# Supplementary material for: RETRACTED ARTICLE: Microbiome analyses of blood and tissues suggest cancerdiagnostic approach
Source: Springer Nature journal article supplement (doi:10.1038/s41586-020-2095-1), 2020-03-11
Supplement: 41586_2020_2095_MOESM3_ESM.xlsx [file 41586_2020_2095_MOESM3_ESM.xlsx]

## Sheet: Fig 1a
	Disease.Type	variable	value
1	LGG	PercentTotal	1.1
2	UCS	PercentTotal	1.1
3	BLCA	PercentTotal	1.6
4	SKCM	PercentTotal	1.8
5	PCPG	PercentTotal	2.1
6	KIRC	PercentTotal	2.6
7	LUSC	PercentTotal	2
8	UCEC	PercentTotal	2.4
9	ACC	PercentTotal	1
10	CHOL	PercentTotal	1.8
11	UVM	PercentTotal	1.8
12	SARC	PercentTotal	2
13	READ	PercentTotal	2.7
14	COAD	PercentTotal	2.8
15	THYM	PercentTotal	3
16	KICH	PercentTotal	3
17	STAD	PercentTotal	3.6
18	THCA	PercentTotal	1.9
19	BRCA	PercentTotal	2.3
20	TGCT	PercentTotal	1.4
21	ESCA	PercentTotal	2.3
22	PRAD	PercentTotal	1.5
23	CESC	PercentTotal	2
24	GBM	PercentTotal	3.6
25	OV	PercentTotal	3.9
26	KIRP	PercentTotal	3
27	LIHC	PercentTotal	3
28	PAAD	PercentTotal	1.9
29	AML	PercentTotal	4.3
30	HNSC	PercentTotal	1.9
31	MESO	PercentTotal	3.3
32	LUAD	PercentTotal	2.3
33	DLBC	PercentTotal	3.6
34	LGG	PercentGenus	0.2
35	UCS	PercentGenus	0.3
36	BLCA	PercentGenus	0.4
37	SKCM	PercentGenus	0.4
38	PCPG	PercentGenus	0.4
39	KIRC	PercentGenus	0.4
40	LUSC	PercentGenus	0.5
41	UCEC	PercentGenus	0.5
42	ACC	PercentGenus	0.6
43	CHOL	PercentGenus	0.6
44	UVM	PercentGenus	0.6
45	SARC	PercentGenus	0.6
46	READ	PercentGenus	0.6
47	COAD	PercentGenus	0.6
48	THYM	PercentGenus	0.6
49	KICH	PercentGenus	0.6
50	STAD	PercentGenus	0.6
51	THCA	PercentGenus	0.7
52	BRCA	PercentGenus	0.7
53	TGCT	PercentGenus	0.8
54	ESCA	PercentGenus	0.8
55	PRAD	PercentGenus	0.9
56	CESC	PercentGenus	0.9
57	GBM	PercentGenus	0.9
58	OV	PercentGenus	0.9
59	KIRP	PercentGenus	1
60	LIHC	PercentGenus	1
61	PAAD	PercentGenus	1.1
62	AML	PercentGenus	1.3
63	HNSC	PercentGenus	1.4
64	MESO	PercentGenus	1.6
65	LUAD	PercentGenus	1.8
66	DLBC	PercentGenus	2.1

## Sheet: Fig 1c
	PC1	PC2	Batch
s17489	-34.9719	60.5476	Canada's Michael Smith Genome Sciences Centre
s17512	-27.6537	46.4346	Canada's Michael Smith Genome Sciences Centre
s17498	-26.1994	55.825	Canada's Michael Smith Genome Sciences Centre
s17528	-6.63697	66.2298	Canada's Michael Smith Genome Sciences Centre
s17535	-16.8206	60.7537	Canada's Michael Smith Genome Sciences Centre
s17482	-94.4187	-1.58176	Broad Institute of MIT and Harvard
s17490	-109.771	4.31322	Baylor College of Medicine
s17541	-19.9716	44.0455	Canada's Michael Smith Genome Sciences Centre
s17499	-14.0889	56.1351	Canada's Michael Smith Genome Sciences Centre
s17500	-5.87253	50.1642	Canada's Michael Smith Genome Sciences Centre
s17545	-22.3535	53.3528	Canada's Michael Smith Genome Sciences Centre
s17516	-37.2333	55.9152	Canada's Michael Smith Genome Sciences Centre
s17480	-95.9507	-1.24952	Broad Institute of MIT and Harvard
s17533	-31.2554	48.7323	Canada's Michael Smith Genome Sciences Centre
s17483	-86.6022	-6.10752	Broad Institute of MIT and Harvard
s17484	-27.6461	47.8859	Canada's Michael Smith Genome Sciences Centre
s17525	-29.9192	53.9112	Canada's Michael Smith Genome Sciences Centre
s17513	-23.7135	48.5384	Canada's Michael Smith Genome Sciences Centre
s17495	-28.7969	65.6861	Canada's Michael Smith Genome Sciences Centre
s17537	-16.044	44.4821	Canada's Michael Smith Genome Sciences Centre
s17493	-48.0077	-34.9698	Baylor College of Medicine
s17511	-21.5735	47.0404	Canada's Michael Smith Genome Sciences Centre
s17520	-24.7817	55.8716	Canada's Michael Smith Genome Sciences Centre
s17486	-22.232	54.1056	Canada's Michael Smith Genome Sciences Centre
s17494	-16.652	49.7913	Canada's Michael Smith Genome Sciences Centre
s17540	-17.2019	43.4635	Canada's Michael Smith Genome Sciences Centre
s17530	-97.7357	2.01564	Baylor College of Medicine
s17543	-17.4249	41.681	Canada's Michael Smith Genome Sciences Centre
s17531	-17.263	55.2294	Canada's Michael Smith Genome Sciences Centre
s17523	-30.5408	52.7946	Canada's Michael Smith Genome Sciences Centre
s17522	-28.8995	54.4439	Canada's Michael Smith Genome Sciences Centre
s17526	-24.4404	52.3059	Canada's Michael Smith Genome Sciences Centre
s17505	-30.3657	42.923	Canada's Michael Smith Genome Sciences Centre
s17502	-15.9372	51.3054	Canada's Michael Smith Genome Sciences Centre
s17496	-20.1811	55.3462	Canada's Michael Smith Genome Sciences Centre
s17501	-19.0836	49.0539	Canada's Michael Smith Genome Sciences Centre
s17497	-29.5517	58.3735	Canada's Michael Smith Genome Sciences Centre
s17527	-23.6717	56.3399	Canada's Michael Smith Genome Sciences Centre
s17492	-24.46	47.9091	Canada's Michael Smith Genome Sciences Centre
s17546	-10.7087	34.2559	Canada's Michael Smith Genome Sciences Centre
s17524	-4.95852	37.2945	Canada's Michael Smith Genome Sciences Centre
s17491	-14.6953	45.6629	Canada's Michael Smith Genome Sciences Centre
s17487	-17.512	56.6294	Canada's Michael Smith Genome Sciences Centre
s17517	-15.0195	55.2385	Canada's Michael Smith Genome Sciences Centre
s17506	-16.7522	47.8044	Canada's Michael Smith Genome Sciences Centre
s17536	-22.2994	66.7875	Canada's Michael Smith Genome Sciences Centre
s17518	-17.0121	44.8552	Canada's Michael Smith Genome Sciences Centre
s17519	-14.4754	52.0713	Canada's Michael Smith Genome Sciences Centre
s17529	-28.8009	52.471	Canada's Michael Smith Genome Sciences Centre
s17507	-38.6191	55.009	Canada's Michael Smith Genome Sciences Centre
s17532	-88.412	-2.85624	Baylor College of Medicine
s17508	-85.8841	-7.98449	Baylor College of Medicine
s17481	-97.7417	-1.25078	Broad Institute of MIT and Harvard
s17514	-11.2701	50.8698	Canada's Michael Smith Genome Sciences Centre
s17478	-97.1952	-0.982757	Washington University School of Medicine
s17485	-17.7768	48.9135	Canada's Michael Smith Genome Sciences Centre
s17479	-106.831	-6.20818	Broad Institute of MIT and Harvard
s17544	-84.3395	-1.97057	Baylor College of Medicine
s17503	-24.473	43.4023	Canada's Michael Smith Genome Sciences Centre
s17542	-29.3074	54.4984	Canada's Michael Smith Genome Sciences Centre
s17538	-103.22	3.80311	Baylor College of Medicine
s17534	-31.2475	56.3196	Canada's Michael Smith Genome Sciences Centre
s17515	-28.9159	57.0312	Canada's Michael Smith Genome Sciences Centre
s17539	-13.4456	38.9131	Canada's Michael Smith Genome Sciences Centre
s17509	-27.6139	48.4222	Canada's Michael Smith Genome Sciences Centre
s17510	-90.2412	-6.73992	Baylor College of Medicine
s17521	-15.0555	46.9662	Canada's Michael Smith Genome Sciences Centre
s17488	-16.4924	50.9552	Canada's Michael Smith Genome Sciences Centre
s17504	-9.53016	51.8775	Canada's Michael Smith Genome Sciences Centre
s17719	-31.1271	54.6335	Canada's Michael Smith Genome Sciences Centre
s17718	-28.6062	42.0352	Canada's Michael Smith Genome Sciences Centre
s17708	-85.1951	-6.57599	Broad Institute of MIT and Harvard
s17717	-23.5556	56.9634	Canada's Michael Smith Genome Sciences Centre
s17716	-107.767	6.32632	Baylor College of Medicine
s17735	-12.2024	37.231	Canada's Michael Smith Genome Sciences Centre
s17712	-23.1811	54.4325	Canada's Michael Smith Genome Sciences Centre
s17707	-89.8264	-7.01235	Broad Institute of MIT and Harvard
s17714	-33.5181	47.8573	Canada's Michael Smith Genome Sciences Centre
s17721	-89.2657	-9.0739	Baylor College of Medicine
s17727	-31.4846	55.0526	Canada's Michael Smith Genome Sciences Centre
s17709	-87.3162	-5.34219	Baylor College of Medicine
s17706	-114.232	4.94581	Broad Institute of MIT and Harvard
s17731	-14.4237	51.259	Canada's Michael Smith Genome Sciences Centre
s17713	-11.7722	41.4642	Canada's Michael Smith Genome Sciences Centre
s17726	-91.0425	-3.30925	Baylor College of Medicine
s17725	-15.0648	37.1774	Canada's Michael Smith Genome Sciences Centre
s17730	-26.0647	54.3314	Canada's Michael Smith Genome Sciences Centre
s17728	-28.1752	60.4104	Canada's Michael Smith Genome Sciences Centre
s17710	-130.624	18.6501	Broad Institute of MIT and Harvard
s17720	-3.40746	53.5455	Canada's Michael Smith Genome Sciences Centre
s17715	-108.272	-2.5447	Washington University School of Medicine
s17724	-11.9106	53.5685	Canada's Michael Smith Genome Sciences Centre
s17722	-24.7621	49.7473	Canada's Michael Smith Genome Sciences Centre
s17734	-22.2165	46.1175	Canada's Michael Smith Genome Sciences Centre
s17732	-93.7863	4.91522	Baylor College of Medicine
s17711	-128.946	5.85491	Broad Institute of MIT and Harvard
s17723	-24.6888	55.546	Canada's Michael Smith Genome Sciences Centre
s17733	-11.8526	51.7022	Canada's Michael Smith Genome Sciences Centre
s17729	-20.4251	41.4893	Canada's Michael Smith Genome Sciences Centre
s17116	-102.292	-2.12796	Broad Institute of MIT and Harvard
s17126	-25.6998	54.6537	Canada's Michael Smith Genome Sciences Centre
s17132	-24.9315	55.9254	Canada's Michael Smith Genome Sciences Centre
s17123	-1.37029	53.4283	Canada's Michael Smith Genome Sciences Centre
s17137	-103.244	6.90508	Baylor College of Medicine
s17125	-63.679	2.50488	Baylor College of Medicine
s17127	-39.1496	60.2632	Canada's Michael Smith Genome Sciences Centre
s17133	-27.5843	48.3004	Canada's Michael Smith Genome Sciences Centre
s17119	-11.3029	39.9625	Canada's Michael Smith Genome Sciences Centre
s17138	-19.0992	47.8555	Canada's Michael Smith Genome Sciences Centre
s17141	-20.7121	40.5269	Canada's Michael Smith Genome Sciences Centre
s17144	-74.2083	-16.9047	Baylor College of Medicine
s17122	-52.9074	-29.8298	Baylor College of Medicine
s17129	-17.9042	47.4876	Canada's Michael Smith Genome Sciences Centre
s17140	-27.7979	44.3256	Canada's Michael Smith Genome Sciences Centre
s17145	-19.3886	46.4802	Canada's Michael Smith Genome Sciences Centre
s17139	-92.5875	-4.40506	Baylor College of Medicine
s17142	-13.8621	50.9511	Canada's Michael Smith Genome Sciences Centre
s17115	-90.0732	-2.19751	Broad Institute of MIT and Harvard
s17131	-15.7523	53.9372	Canada's Michael Smith Genome Sciences Centre
s17135	-17.1454	44.0007	Canada's Michael Smith Genome Sciences Centre
s17134	-27.7871	45.9681	Canada's Michael Smith Genome Sciences Centre
s17120	-48.1622	69.543	Canada's Michael Smith Genome Sciences Centre
s17121	-24.8624	68.9213	Canada's Michael Smith Genome Sciences Centre
s17130	-26.9761	43.5182	Canada's Michael Smith Genome Sciences Centre
s17113	-104.041	-4.11637	Broad Institute of MIT and Harvard
s17112	-82.4216	-0.651453	Washington University School of Medicine
s17118	-42.1801	60.7545	Canada's Michael Smith Genome Sciences Centre
s17146	-7.49367	31.2034	Canada's Michael Smith Genome Sciences Centre
s17114	-82.5903	-7.65824	Broad Institute of MIT and Harvard
s17124	-94.1239	-0.852811	Washington University School of Medicine
s17128	-21.6997	48.0089	Canada's Michael Smith Genome Sciences Centre
s17136	-30.8483	45.2392	Canada's Michael Smith Genome Sciences Centre
s17143	-89.1389	-3.43556	Baylor College of Medicine
s17117	-30.5137	61.7482	Canada's Michael Smith Genome Sciences Centre
s17862	-110.982	2.10572	Broad Institute of MIT and Harvard
s17871	-3.35924	40.2453	Canada's Michael Smith Genome Sciences Centre
s17865	-32.4761	67.8114	Canada's Michael Smith Genome Sciences Centre
s17880	-22.1097	53.0938	Canada's Michael Smith Genome Sciences Centre
s17886	-25.4971	53.497	Canada's Michael Smith Genome Sciences Centre
s17869	-28.1817	61.2345	Canada's Michael Smith Genome Sciences Centre
s17878	-112.319	8.14355	Baylor College of Medicine
s17885	-112.558	0.474256	Baylor College of Medicine
s17876	-21.8727	59.9226	Canada's Michael Smith Genome Sciences Centre
s17874	-17.079	51.3594	Canada's Michael Smith Genome Sciences Centre
s17884	-10.0458	54.8758	Canada's Michael Smith Genome Sciences Centre
s17867	-24.6089	52.1274	Canada's Michael Smith Genome Sciences Centre
s17861	-93.8988	-10.7601	Washington University School of Medicine
s17883	-90.1849	-3.425	Baylor College of Medicine
s17888	-23.681	50.847	Canada's Michael Smith Genome Sciences Centre
s17864	-16.2095	49.8899	Canada's Michael Smith Genome Sciences Centre
s17887	-17.2882	48.2956	Canada's Michael Smith Genome Sciences Centre
s17873	-126.035	12.3425	Broad Institute of MIT and Harvard
s17882	-91.1512	-18.1054	Baylor College of Medicine
s17879	-21.3079	43.0239	Canada's Michael Smith Genome Sciences Centre
s17872	-18.0659	49.7333	Canada's Michael Smith Genome Sciences Centre
s17870	-22.8461	41.9133	Canada's Michael Smith Genome Sciences Centre
s17866	-17.3052	45.9083	Canada's Michael Smith Genome Sciences Centre
s17863	-104.835	2.14685	Broad Institute of MIT and Harvard
s17877	-28.3104	59.5588	Canada's Michael Smith Genome Sciences Centre
s17868	-127.376	36.1788	Washington University School of Medicine
s17881	-20.069	58.2891	Canada's Michael Smith Genome Sciences Centre
s17875	-19.0934	51.3522	Canada's Michael Smith Genome Sciences Centre
s17283	-36.565	50.264	Canada's Michael Smith Genome Sciences Centre
s17312	-24.7953	42.7016	Canada's Michael Smith Genome Sciences Centre
s17289	-118.924	3.25676	Broad Institute of MIT and Harvard
s17295	-20.7877	41.1736	Canada's Michael Smith Genome Sciences Centre
s17286	-33.7849	75.3283	Canada's Michael Smith Genome Sciences Centre
s17318	-5.64741	43.1973	Canada's Michael Smith Genome Sciences Centre
s17322	-13.8424	54.2078	Canada's Michael Smith Genome Sciences Centre
s17290	-26.6876	48.7554	Canada's Michael Smith Genome Sciences Centre
s17314	-25.493	54.7798	Canada's Michael Smith Genome Sciences Centre
s17305	-13.1141	44.7498	Canada's Michael Smith Genome Sciences Centre
s17313	-26.3974	50.9505	Canada's Michael Smith Genome Sciences Centre
s17299	-19.13	48.2175	Canada's Michael Smith Genome Sciences Centre
s17301	-11.6965	34.5726	Canada's Michael Smith Genome Sciences Centre
s17293	-19.5254	50.4095	Canada's Michael Smith Genome Sciences Centre
s17282	-27.096	53.9433	Canada's Michael Smith Genome Sciences Centre
s17288	-31.1401	68.2202	Canada's Michael Smith Genome Sciences Centre
s17280	-106.336	-1.41619	Broad Institute of MIT and Harvard
s17308	-12.8475	43.006	Canada's Michael Smith Genome Sciences Centre
s17296	-23.1198	45.2563	Canada's Michael Smith Genome Sciences Centre
s17287	-37.2378	64.2183	Canada's Michael Smith Genome Sciences Centre
s17319	-22.0405	49.6841	Canada's Michael Smith Genome Sciences Centre
s17309	-18.984	46.3701	Canada's Michael Smith Genome Sciences Centre
s17284	-31.4691	39.8907	Canada's Michael Smith Genome Sciences Centre
s17291	-96.8343	5.79985	Baylor College of Medicine
s17298	-37.9526	57.9252	Canada's Michael Smith Genome Sciences Centre
s17292	-40.6184	64.9834	Canada's Michael Smith Genome Sciences Centre
s17281	-26.9102	42.7869	Canada's Michael Smith Genome Sciences Centre
s17306	-25.227	37.8183	Canada's Michael Smith Genome Sciences Centre
s17316	-74.9038	-17.2385	Baylor College of Medicine
s17307	-18.6736	45.431	Canada's Michael Smith Genome Sciences Centre
s17311	-16.9845	-38.1914	Baylor College of Medicine
s17321	-22.6394	53.5071	Canada's Michael Smith Genome Sciences Centre
s17303	-28.939	58.7702	Canada's Michael Smith Genome Sciences Centre
s17297	-21.315	50.7965	Canada's Michael Smith Genome Sciences Centre
s17317	-28.2882	50.0469	Canada's Michael Smith Genome Sciences Centre
s17300	-111.678	12.9071	Baylor College of Medicine
s17285	-38.5751	63.4333	Canada's Michael Smith Genome Sciences Centre
s17310	-32.477	55.7021	Canada's Michael Smith Genome Sciences Centre
s17320	-20.3479	46.0679	Canada's Michael Smith Genome Sciences Centre
s17315	-37.0668	54.4667	Canada's Michael Smith Genome Sciences Centre
s17304	-24.4695	44.2186	Canada's Michael Smith Genome Sciences Centre
s17302	-27.7533	-35.2348	Baylor College of Medicine
s17294	-32.0591	-32.8968	Baylor College of Medicine
s17741	-19.4241	51.8649	Canada's Michael Smith Genome Sciences Centre
s17749	-16.2158	36.8212	Canada's Michael Smith Genome Sciences Centre
s17755	-22.0343	42.3782	Canada's Michael Smith Genome Sciences Centre
s17744	-11.762	47.9368	Canada's Michael Smith Genome Sciences Centre
s17758	-9.79749	41.0864	Canada's Michael Smith Genome Sciences Centre
s17745	-103.665	-9.47557	Washington University School of Medicine
s17753	-92.5107	-7.33791	Baylor College of Medicine
s17740	-96.5378	-0.493332	Washington University School of Medicine
s17748	-133.309	15.6494	Broad Institute of MIT and Harvard
s17742	-42.1704	63.1679	Canada's Michael Smith Genome Sciences Centre
s17739	-16.9853	43.3922	Canada's Michael Smith Genome Sciences Centre
s17759	-26.0165	42.8189	Canada's Michael Smith Genome Sciences Centre
s17736	-13.9287	39.0677	Canada's Michael Smith Genome Sciences Centre
s17743	-35.1572	54.4725	Canada's Michael Smith Genome Sciences Centre
s17738	-14.1549	58.4046	Canada's Michael Smith Genome Sciences Centre
s17737	-15.6753	61.8456	Canada's Michael Smith Genome Sciences Centre
s17754	-19.4906	58.2196	Canada's Michael Smith Genome Sciences Centre
s17752	-13.9917	56.4563	Canada's Michael Smith Genome Sciences Centre
s17756	-10.3567	44.7226	Canada's Michael Smith Genome Sciences Centre
s17751	-69.0506	-20.6985	Baylor College of Medicine
s17757	-2.14151	43.2701	Canada's Michael Smith Genome Sciences Centre
s17747	-33.1821	43.5218	Canada's Michael Smith Genome Sciences Centre
s17750	-17.629	47.2079	Canada's Michael Smith Genome Sciences Centre
s17746	-31.0215	50.7724	Canada's Michael Smith Genome Sciences Centre
s17154	-23.0096	44.4451	Canada's Michael Smith Genome Sciences Centre
s17157	-35.8204	50.0961	Canada's Michael Smith Genome Sciences Centre
s17149	-127.441	7.2049	Broad Institute of MIT and Harvard
s17160	-33.0709	58.0438	Canada's Michael Smith Genome Sciences Centre
s17163	-96.2091	5.26518	Baylor College of Medicine
s17148	-9.19155	41.821	Canada's Michael Smith Genome Sciences Centre
s17161	-23.8106	54.8263	Canada's Michael Smith Genome Sciences Centre
s17158	-20.0489	60.2375	Canada's Michael Smith Genome Sciences Centre
s17155	-22.5996	57.2662	Canada's Michael Smith Genome Sciences Centre
s17156	-4.98802	41.5553	Canada's Michael Smith Genome Sciences Centre
s17162	-23.165	50.8322	Canada's Michael Smith Genome Sciences Centre
s17153	-4.42817	39.6613	Canada's Michael Smith Genome Sciences Centre
s17147	-97.5803	-3.18273	Washington University School of Medicine
s17152	-22.2741	46.1627	Canada's Michael Smith Genome Sciences Centre
s17151	-15.5615	56.1883	Canada's Michael Smith Genome Sciences Centre
s17159	-96.8763	-8.77958	Baylor College of Medicine
s17150	-33.322	61.3928	Canada's Michael Smith Genome Sciences Centre
s17910	-111.833	12.4264	Baylor College of Medicine
s17920	-21.6421	-36.2198	Baylor College of Medicine
s17940	-26.7051	51.6161	Canada's Michael Smith Genome Sciences Centre
s17976	-13.895	51.1048	Canada's Michael Smith Genome Sciences Centre
s17955	-27.7536	59.1082	Canada's Michael Smith Genome Sciences Centre
s17917	-16.0818	51.3806	Canada's Michael Smith Genome Sciences Centre
s17972	-23.1305	42.6541	Canada's Michael Smith Genome Sciences Centre
s17895	-17.7825	42.4925	Canada's Michael Smith Genome Sciences Centre
s17924	-17.7001	44.704	Canada's Michael Smith Genome Sciences Centre
s17939	-15.5273	38.1267	Canada's Michael Smith Genome Sciences Centre
s17960	-10.5506	44.7167	Canada's Michael Smith Genome Sciences Centre
s17923	-35.0911	54.8367	Canada's Michael Smith Genome Sciences Centre
s17906	-21.0203	40.5873	Canada's Michael Smith Genome Sciences Centre
s17893	-26.7966	53.3473	Canada's Michael Smith Genome Sciences Centre
s17942	-12.9344	54.5555	Canada's Michael Smith Genome Sciences Centre
s17909	-30.8057	64.2348	Canada's Michael Smith Genome Sciences Centre
s17954	-26.51	51.1125	Canada's Michael Smith Genome Sciences Centre
s17941	-14.0146	55.8579	Canada's Michael Smith Genome Sciences Centre
s17949	-22.466	42.2751	Canada's Michael Smith Genome Sciences Centre
s17904	-20.4232	55.7167	Canada's Michael Smith Genome Sciences Centre
s17902	-20.4316	51.4606	Canada's Michael Smith Genome Sciences Centre
s17958	-40.873	57.0302	Canada's Michael Smith Genome Sciences Centre
s17951	-9.42821	46.2747	Canada's Michael Smith Genome Sciences Centre
s17950	-86.6939	-10.12	Baylor College of Medicine
s17916	-14.3095	47.8116	Canada's Michael Smith Genome Sciences Centre
s17969	-21.4217	55.9198	Canada's Michael Smith Genome Sciences Centre
s17956	-24.3861	44.2849	Canada's Michael Smith Genome Sciences Centre
s17925	-28.7743	53.9404	Canada's Michael Smith Genome Sciences Centre
s17933	-34.1399	50.4581	Canada's Michael Smith Genome Sciences Centre
s17961	-96.6447	7.44454	Baylor College of Medicine
s17935	-16.7829	50.1861	Canada's Michael Smith Genome Sciences Centre
s17947	-20.676	49.3487	Canada's Michael Smith Genome Sciences Centre
s17897	-34.5617	47.1981	Canada's Michael Smith Genome Sciences Centre
s17929	-10.8929	49.3764	Canada's Michael Smith Genome Sciences Centre
s17975	-17.5346	56.1733	Canada's Michael Smith Genome Sciences Centre
s17943	-31.4571	49.1602	Canada's Michael Smith Genome Sciences Centre
s17977	-39.3406	46.7548	Canada's Michael Smith Genome Sciences Centre
s17974	-18.1103	46.1099	Canada's Michael Smith Genome Sciences Centre
s17911	-23.6329	62.9742	Canada's Michael Smith Genome Sciences Centre
s17891	-23.1407	50.0116	Canada's Michael Smith Genome Sciences Centre
s17938	-14.2717	50.7374	Canada's Michael Smith Genome Sciences Centre
s17970	-20.843	50.7002	Canada's Michael Smith Genome Sciences Centre
s17953	-15.375	45.8512	Canada's Michael Smith Genome Sciences Centre
s17914	-25.1972	50.89	Canada's Michael Smith Genome Sciences Centre
s17898	-22.2414	49.295	Canada's Michael Smith Genome Sciences Centre
s17965	-15.2264	59.9462	Canada's Michael Smith Genome Sciences Centre
s17912	-12.546	54.0379	Canada's Michael Smith Genome Sciences Centre
s17903	-14.3314	41.6796	Canada's Michael Smith Genome Sciences Centre
s17900	-8.71216	49.3097	Canada's Michael Smith Genome Sciences Centre
s17934	-30.5213	48.7611	Canada's Michael Smith Genome Sciences Centre
s17936	-18.1713	43.6999	Canada's Michael Smith Genome Sciences Centre
s17892	-19.6638	39.3422	Canada's Michael Smith Genome Sciences Centre
s17966	-13.7073	41.0582	Canada's Michael Smith Genome Sciences Centre
s17944	-104.619	2.64563	Baylor College of Medicine
s17889	-106.324	-0.0940331	Broad Institute of MIT and Harvard
s17973	-18.1268	36.3503	Canada's Michael Smith Genome Sciences Centre
s17913	-5.24237	42.2465	Canada's Michael Smith Genome Sciences Centre
s17952	-26.7941	51.7703	Canada's Michael Smith Genome Sciences Centre
s17921	-23.7575	53.6753	Canada's Michael Smith Genome Sciences Centre
s17907	-17.7616	50.4561	Canada's Michael Smith Genome Sciences Centre
s17946	-30.5996	51.6665	Canada's Michael Smith Genome Sciences Centre
s17926	-11.2132	42.7355	Canada's Michael Smith Genome Sciences Centre
s17948	-36.5284	54.5241	Canada's Michael Smith Genome Sciences Centre
s17927	-15.3201	48.5985	Canada's Michael Smith Genome Sciences Centre
s17963	-7.17571	49.8981	Canada's Michael Smith Genome Sciences Centre
s17937	-25.6652	56.5653	Canada's Michael Smith Genome Sciences Centre
s17971	-15.859	49.6736	Canada's Michael Smith Genome Sciences Centre
s17945	-27.3491	48.2787	Canada's Michael Smith Genome Sciences Centre
s17959	-5.6352	70.1292	Canada's Michael Smith Genome Sciences Centre
s17905	-27.474	67.9253	Canada's Michael Smith Genome Sciences Centre
s17928	-28.4857	47.9639	Canada's Michael Smith Genome Sciences Centre
s17896	-34.1417	43.0391	Canada's Michael Smith Genome Sciences Centre
s17967	-22.0416	47.7597	Canada's Michael Smith Genome Sciences Centre
s17890	-23.4032	55.0185	Canada's Michael Smith Genome Sciences Centre
s17908	-13.1647	54.2908	Canada's Michael Smith Genome Sciences Centre
s17968	-26.0887	51.3907	Canada's Michael Smith Genome Sciences Centre
s17894	-30.8885	55.2114	Canada's Michael Smith Genome Sciences Centre
s17918	-22.7189	59.9197	Canada's Michael Smith Genome Sciences Centre
s17931	-14.2217	44.3303	Canada's Michael Smith Genome Sciences Centre
s17932	-28.0046	50.0792	Canada's Michael Smith Genome Sciences Centre
s17915	-31.2542	67.1487	Canada's Michael Smith Genome Sciences Centre
s17899	-85.0425	-6.73214	Baylor College of Medicine
s17922	-11.5211	52.1408	Canada's Michael Smith Genome Sciences Centre
s17962	-16.1622	46.2965	Canada's Michael Smith Genome Sciences Centre
s17901	-25.269	59.3624	Canada's Michael Smith Genome Sciences Centre
s17957	-29.924	54.3191	Canada's Michael Smith Genome Sciences Centre
s17919	-11.9267	57.3916	Canada's Michael Smith Genome Sciences Centre
s17964	-25.2005	47.0676	Canada's Michael Smith Genome Sciences Centre
s17930	-37.6064	45.1373	Canada's Michael Smith Genome Sciences Centre
s17325	-36.4805	49.6258	Canada's Michael Smith Genome Sciences Centre
s17331	-20.2936	57.1941	Canada's Michael Smith Genome Sciences Centre
s17343	-13.45	50.4366	Canada's Michael Smith Genome Sciences Centre
s17328	-1.59581	53.7009	Canada's Michael Smith Genome Sciences Centre
s17341	-19.6768	47.8952	Canada's Michael Smith Genome Sciences Centre
s17342	-18.8501	55.7986	Canada's Michael Smith Genome Sciences Centre
s17345	-96.1342	1.05249	Baylor College of Medicine
s17338	-37.8548	68.4201	Canada's Michael Smith Genome Sciences Centre
s17333	-25.1357	53.082	Canada's Michael Smith Genome Sciences Centre
s17329	-35.126	67.905	Canada's Michael Smith Genome Sciences Centre
s17324	-27.6348	39.8814	Canada's Michael Smith Genome Sciences Centre
s17344	-84.6723	-15.1112	Baylor College of Medicine
s17335	-10.8431	38.1942	Canada's Michael Smith Genome Sciences Centre
s17334	-21.5282	-33.4629	Baylor College of Medicine
s17332	-86.0417	-16.5167	Baylor College of Medicine
s17326	-32.9038	59.7043	Canada's Michael Smith Genome Sciences Centre
s17346	-26.6489	42.9803	Canada's Michael Smith Genome Sciences Centre
s17336	-5.41518	45.881	Canada's Michael Smith Genome Sciences Centre
s17323	-91.9234	-3.20522	Broad Institute of MIT and Harvard
s17340	-25.4126	45.2435	Canada's Michael Smith Genome Sciences Centre
s17347	-28.1999	47.8104	Canada's Michael Smith Genome Sciences Centre
s17557	-3.94617	38.9952	Canada's Michael Smith Genome Sciences Centre
s17547	-112.953	8.7708	Broad Institute of MIT and Harvard
s17570	-20.0098	46.1091	Canada's Michael Smith Genome Sciences Centre
s17581	-14.1513	47.658	Canada's Michael Smith Genome Sciences Centre
s17584	-12.1931	47.9889	Canada's Michael Smith Genome Sciences Centre
s17563	-24.8191	-30.1766	Baylor College of Medicine
s17585	-26.6119	50.2283	Canada's Michael Smith Genome Sciences Centre
s17580	-17.245	41.3784	Canada's Michael Smith Genome Sciences Centre
s17571	-23.4745	44.4801	Canada's Michael Smith Genome Sciences Centre
s17561	-25.197	48.4658	Canada's Michael Smith Genome Sciences Centre
s17554	-20.7724	47.526	Canada's Michael Smith Genome Sciences Centre
s17569	-24.4936	40.3957	Canada's Michael Smith Genome Sciences Centre
s17573	-21.0756	48.8382	Canada's Michael Smith Genome Sciences Centre
s17550	-24.745	54.1561	Canada's Michael Smith Genome Sciences Centre
s17583	-24.2302	54.1841	Canada's Michael Smith Genome Sciences Centre
s17578	-14.1221	49.6911	Canada's Michael Smith Genome Sciences Centre
s17565	-26.4774	52.6903	Canada's Michael Smith Genome Sciences Centre
s17549	-81.8295	-11.0722	Baylor College of Medicine
s17577	-27.8083	60.395	Canada's Michael Smith Genome Sciences Centre
s17562	-27.2361	-34.8161	Baylor College of Medicine
s17551	-86.0937	-9.47822	Baylor College of Medicine
s17567	-18.5237	46.2836	Canada's Michael Smith Genome Sciences Centre
s17576	-25.1275	48.8122	Canada's Michael Smith Genome Sciences Centre
s17579	-94.9864	6.69246	Baylor College of Medicine
s17568	-23.5411	49.8723	Canada's Michael Smith Genome Sciences Centre
s17572	-18.8601	46.5393	Canada's Michael Smith Genome Sciences Centre
s17586	-92.9893	-5.46801	Washington University School of Medicine
s17548	-89.9829	0.263209	Broad Institute of MIT and Harvard
s17560	-20.063	60.5032	Canada's Michael Smith Genome Sciences Centre
s17558	-78.099	-18.884	Baylor College of Medicine
s17556	-19.9294	56.8829	Canada's Michael Smith Genome Sciences Centre
s17574	-24.5129	43.6401	Canada's Michael Smith Genome Sciences Centre
s17575	-16.1312	44.6381	Canada's Michael Smith Genome Sciences Centre
s17564	-6.72906	45.0297	Canada's Michael Smith Genome Sciences Centre
s17582	-15.5258	49.8208	Canada's Michael Smith Genome Sciences Centre
s17552	-27.191	52.5276	Canada's Michael Smith Genome Sciences Centre
s17559	-17.3506	43.2078	Canada's Michael Smith Genome Sciences Centre
s17566	-2.49001	47.5308	Canada's Michael Smith Genome Sciences Centre
s17664	-22.2676	48.0511	Canada's Michael Smith Genome Sciences Centre
s17689	-88.1191	1.12943	Baylor College of Medicine
s17698	-25.3928	58.7918	Canada's Michael Smith Genome Sciences Centre
s17663	-33.16	54.1324	Canada's Michael Smith Genome Sciences Centre
s17670	-28.9325	48.5242	Canada's Michael Smith Genome Sciences Centre
s17672	-115.046	11.4539	Baylor College of Medicine
s17690	-25.5506	49.7601	Canada's Michael Smith Genome Sciences Centre
s17656	-23.1749	48.6976	Canada's Michael Smith Genome Sciences Centre
s17654	-118.691	15.6264	Baylor College of Medicine
s17653	-32.2459	65.1657	Canada's Michael Smith Genome Sciences Centre
s17679	-30.0742	48.2069	Canada's Michael Smith Genome Sciences Centre
s17673	-87.2192	-7.8422	Baylor College of Medicine
s17665	-22.9341	41.2244	Canada's Michael Smith Genome Sciences Centre
s17702	-37.8679	45.3416	Canada's Michael Smith Genome Sciences Centre
s17677	-26.9606	-34.6478	Baylor College of Medicine
s17657	-48.7557	-34.978	Baylor College of Medicine
s17668	-22.6753	67.541	Canada's Michael Smith Genome Sciences Centre
s17678	-27.2992	45.6054	Canada's Michael Smith Genome Sciences Centre
s17675	-24.8467	52.0563	Canada's Michael Smith Genome Sciences Centre
s17682	-26.8481	51.7146	Canada's Michael Smith Genome Sciences Centre
s17691	-18.5247	45.6676	Canada's Michael Smith Genome Sciences Centre
s17661	-121.73	6.69222	Washington University School of Medicine
s17652	-94.8839	-4.74703	Broad Institute of MIT and Harvard
s17674	-33.1483	54.2915	Canada's Michael Smith Genome Sciences Centre
s17686	-20.7374	44.8808	Canada's Michael Smith Genome Sciences Centre
s17659	-10.0228	46.4024	Canada's Michael Smith Genome Sciences Centre
s17692	-7.51675	46.0956	Canada's Michael Smith Genome Sciences Centre
s17687	-25.1774	53.4818	Canada's Michael Smith Genome Sciences Centre
s17685	-17.4466	61.3917	Canada's Michael Smith Genome Sciences Centre
s17671	-8.98601	38.8878	Canada's Michael Smith Genome Sciences Centre
s17666	-20.8327	49.8351	Canada's Michael Smith Genome Sciences Centre
s17700	-10.4511	33.2313	Canada's Michael Smith Genome Sciences Centre
s17669	-11.2695	49.8081	Canada's Michael Smith Genome Sciences Centre
s17704	-24.2544	51.4051	Canada's Michael Smith Genome Sciences Centre
s17660	-25.3302	49.3063	Canada's Michael Smith Genome Sciences Centre
s17688	-9.12454	42.4927	Canada's Michael Smith Genome Sciences Centre
s17693	-10.5928	44.3676	Canada's Michael Smith Genome Sciences Centre
s17701	-78.9471	-10.3983	Baylor College of Medicine
s17683	-21.5809	49.9872	Canada's Michael Smith Genome Sciences Centre
s17676	-30.6531	56.603	Canada's Michael Smith Genome Sciences Centre
s17697	-21.6249	43.2183	Canada's Michael Smith Genome Sciences Centre
s17658	-42.9815	64.2641	Canada's Michael Smith Genome Sciences Centre
s17655	-39.0524	59.1104	Canada's Michael Smith Genome Sciences Centre
s17699	-13.0502	46.2677	Canada's Michael Smith Genome Sciences Centre
s17680	-14.3144	49.6177	Canada's Michael Smith Genome Sciences Centre
s17694	-22.5612	52.5887	Canada's Michael Smith Genome Sciences Centre
s17662	-24.971	58.636	Canada's Michael Smith Genome Sciences Centre
s17695	-18.5004	48.0017	Canada's Michael Smith Genome Sciences Centre
s17667	-7.74578	44.4839	Canada's Michael Smith Genome Sciences Centre
s17684	-34.3488	50.4574	Canada's Michael Smith Genome Sciences Centre
s17703	-11.4856	28.534	Canada's Michael Smith Genome Sciences Centre
s17705	-20.2922	43.8525	Canada's Michael Smith Genome Sciences Centre
s17681	-17.1604	50.376	Canada's Michael Smith Genome Sciences Centre
s17696	-8.25956	43.4266	Canada's Michael Smith Genome Sciences Centre
s18083	-110.913	-3.28385	Broad Institute of MIT and Harvard
s18108	-30.0169	64.8279	Canada's Michael Smith Genome Sciences Centre
s18137	-17.4622	43.9363	Canada's Michael Smith Genome Sciences Centre
s18125	-25.015	54.6192	Canada's Michael Smith Genome Sciences Centre
s18119	-22.0424	52.951	Canada's Michael Smith Genome Sciences Centre
s18130	-15.7699	52.0875	Canada's Michael Smith Genome Sciences Centre
s18116	-86.4465	-6.50825	Baylor College of Medicine
s18086	-85.4173	-5.73697	Baylor College of Medicine
s18111	-25.1646	52.4999	Canada's Michael Smith Genome Sciences Centre
s18114	-27.903	50.1257	Canada's Michael Smith Genome Sciences Centre
s18103	-29.3705	60.6837	Canada's Michael Smith Genome Sciences Centre
s18102	-29.7079	51.2715	Canada's Michael Smith Genome Sciences Centre
s18093	-14.4552	57.1004	Canada's Michael Smith Genome Sciences Centre
s18132	-18.7328	59.1181	Canada's Michael Smith Genome Sciences Centre
s18131	-89.8393	-1.93382	Baylor College of Medicine
s18140	-32.8811	40.9081	Canada's Michael Smith Genome Sciences Centre
s18099	-16.7806	42.8683	Canada's Michael Smith Genome Sciences Centre
s18144	-10.8185	38.4902	Canada's Michael Smith Genome Sciences Centre
s18088	-35.69	72.9006	Canada's Michael Smith Genome Sciences Centre
s18112	-38.4228	61.9184	Canada's Michael Smith Genome Sciences Centre
s18090	-47.136	73.0336	Canada's Michael Smith Genome Sciences Centre
s18136	-11.8889	54.1188	Canada's Michael Smith Genome Sciences Centre
s18107	-32.1372	47.1111	Canada's Michael Smith Genome Sciences Centre
s18129	-28.3081	44.3982	Canada's Michael Smith Genome Sciences Centre
s18084	-7.25121	49.7564	Canada's Michael Smith Genome Sciences Centre
s18139	-29.0788	57.4713	Canada's Michael Smith Genome Sciences Centre
s18123	-18.5464	47.2041	Canada's Michael Smith Genome Sciences Centre
s18138	-11.3043	50.33	Canada's Michael Smith Genome Sciences Centre
s18143	-29.0507	45.309	Canada's Michael Smith Genome Sciences Centre
s18121	-18.6188	49.898	Canada's Michael Smith Genome Sciences Centre
s18091	-21.8467	63.4351	Canada's Michael Smith Genome Sciences Centre
s18128	-12.2366	50.6275	Canada's Michael Smith Genome Sciences Centre
s18127	-23.1677	55.8268	Canada's Michael Smith Genome Sciences Centre
s18122	-25.9517	54.3717	Canada's Michael Smith Genome Sciences Centre
s18135	-7.48107	55.4366	Canada's Michael Smith Genome Sciences Centre
s18126	-31.2631	52.0444	Canada's Michael Smith Genome Sciences Centre
s18118	-28.3635	55.6925	Canada's Michael Smith Genome Sciences Centre
s18145	-19.7862	46.1242	Canada's Michael Smith Genome Sciences Centre
s18101	-32.9932	56.1258	Canada's Michael Smith Genome Sciences Centre
s18113	-23.5131	52.7075	Canada's Michael Smith Genome Sciences Centre
s18104	-28.7729	64.7734	Canada's Michael Smith Genome Sciences Centre
s18133	-24.7344	51.5176	Canada's Michael Smith Genome Sciences Centre
s18142	-16.6155	47.1614	Canada's Michael Smith Genome Sciences Centre
s18124	-27.1735	38.0232	Canada's Michael Smith Genome Sciences Centre
s18094	-11.7505	52.4672	Canada's Michael Smith Genome Sciences Centre
s18134	-26.7626	65.5725	Canada's Michael Smith Genome Sciences Centre
s18106	-10.8113	44.4652	Canada's Michael Smith Genome Sciences Centre
s18110	-34.1726	55.201	Canada's Michael Smith Genome Sciences Centre
s18141	-36.1633	39.8655	Canada's Michael Smith Genome Sciences Centre
s18100	-26.9626	57.9132	Canada's Michael Smith Genome Sciences Centre
s18081	-100.192	-3.19098	Washington University School of Medicine
s18146	-20.3866	39.7339	Canada's Michael Smith Genome Sciences Centre
s18120	-30.6848	60.0506	Canada's Michael Smith Genome Sciences Centre
s18115	-7.26879	57.6209	Canada's Michael Smith Genome Sciences Centre
s18105	-29.6838	56.6399	Canada's Michael Smith Genome Sciences Centre
s18085	-121.034	21.4987	Baylor College of Medicine
s18096	-19.0709	-37.2074	Baylor College of Medicine
s18109	-31.8485	55.1474	Canada's Michael Smith Genome Sciences Centre
s18095	-26.7991	53.4015	Canada's Michael Smith Genome Sciences Centre
s18089	-90.7055	-5.21534	Washington University School of Medicine
s18082	-96.8651	-2.28365	Washington University School of Medicine
s18097	-27.3489	59.0625	Canada's Michael Smith Genome Sciences Centre
s18087	-12.8913	35.5537	Canada's Michael Smith Genome Sciences Centre
s18098	-19.968	56.1236	Canada's Michael Smith Genome Sciences Centre
s18117	-119.549	14.0955	Baylor College of Medicine
s17211	-27.7007	42.5975	Canada's Michael Smith Genome Sciences Centre
s17224	-13.709	45.9696	Canada's Michael Smith Genome Sciences Centre
s17264	-17.7255	51.7001	Canada's Michael Smith Genome Sciences Centre
s17230	-15.6291	62.6722	Canada's Michael Smith Genome Sciences Centre
s17260	-13.2957	55.4927	Canada's Michael Smith Genome Sciences Centre
s17279	-17.0963	53.2535	Canada's Michael Smith Genome Sciences Centre
s17209	-32.5541	46.4268	Canada's Michael Smith Genome Sciences Centre
s17266	-18.7363	50.9936	Canada's Michael Smith Genome Sciences Centre
s17275	-17.6247	45.5963	Canada's Michael Smith Genome Sciences Centre
s17270	-22.7804	44.9921	Canada's Michael Smith Genome Sciences Centre
s17263	-17.1589	41.3845	Canada's Michael Smith Genome Sciences Centre
s17204	-88.9021	-2.5655	Broad Institute of MIT and Harvard
s17267	-20.8768	55.8451	Canada's Michael Smith Genome Sciences Centre
s17248	-6.61061	45.335	Canada's Michael Smith Genome Sciences Centre
s17236	-14.4151	39.3982	Canada's Michael Smith Genome Sciences Centre
s17232	-27.3493	45.6511	Canada's Michael Smith Genome Sciences Centre
s17239	-25.2249	41.1248	Canada's Michael Smith Genome Sciences Centre
s17262	-16.7032	39.1419	Canada's Michael Smith Genome Sciences Centre
s17272	-27.7713	48.9275	Canada's Michael Smith Genome Sciences Centre
s17258	-27.6549	-31.4614	Baylor College of Medicine
s17227	-47.5172	70.668	Canada's Michael Smith Genome Sciences Centre
s17234	-3.2225	34.0079	Canada's Michael Smith Genome Sciences Centre
s17208	-29.469	44.402	Canada's Michael Smith Genome Sciences Centre
s17276	-10.4278	45.5691	Canada's Michael Smith Genome Sciences Centre
s17250	-13.3961	51.1684	Canada's Michael Smith Genome Sciences Centre
s17219	-23.4699	60.8755	Canada's Michael Smith Genome Sciences Centre
s17205	-80.9361	-6.8891	Baylor College of Medicine
s17217	-7.09129	36.1258	Canada's Michael Smith Genome Sciences Centre
s17243	-30.0366	51.5357	Canada's Michael Smith Genome Sciences Centre
s17252	-15.867	49.6389	Canada's Michael Smith Genome Sciences Centre
s17271	-16.3542	48.2237	Canada's Michael Smith Genome Sciences Centre
s17223	-22.2676	59.8672	Canada's Michael Smith Genome Sciences Centre
s17226	-20.6456	49.9686	Canada's Michael Smith Genome Sciences Centre
s17257	-28.7222	49.9242	Canada's Michael Smith Genome Sciences Centre
s17207	-88.9683	-6.63066	Baylor College of Medicine
s17259	-19.4249	48.0517	Canada's Michael Smith Genome Sciences Centre
s17237	-19.2484	47.0001	Canada's Michael Smith Genome Sciences Centre
s17241	-24.3748	48.279	Canada's Michael Smith Genome Sciences Centre
s17240	-11.3028	50.0482	Canada's Michael Smith Genome Sciences Centre
s17242	-17.3297	41.4427	Canada's Michael Smith Genome Sciences Centre
s17216	-14.2687	42.4802	Canada's Michael Smith Genome Sciences Centre
s17249	-19.8998	42.3856	Canada's Michael Smith Genome Sciences Centre
s17233	-13.1486	42.8524	Canada's Michael Smith Genome Sciences Centre
s17255	-32.2346	56.4348	Canada's Michael Smith Genome Sciences Centre
s17213	-23.379	61.8633	Canada's Michael Smith Genome Sciences Centre
s17268	-17.7948	57.0958	Canada's Michael Smith Genome Sciences Centre
s17244	-6.06504	43.5731	Canada's Michael Smith Genome Sciences Centre
s17269	-19.814	45.716	Canada's Michael Smith Genome Sciences Centre
s17254	-16.8016	39.7593	Canada's Michael Smith Genome Sciences Centre
s17212	-19.5522	59.7481	Canada's Michael Smith Genome Sciences Centre
s17206	-19.757	50.7466	Canada's Michael Smith Genome Sciences Centre
s17214	-15.6418	46.9381	Canada's Michael Smith Genome Sciences Centre
s17278	-8.37857	57.8272	Canada's Michael Smith Genome Sciences Centre
s17229	-27.1627	49.9496	Canada's Michael Smith Genome Sciences Centre
s17274	-20.2511	38.8341	Canada's Michael Smith Genome Sciences Centre
s17218	-16.6588	55.9987	Canada's Michael Smith Genome Sciences Centre
s17225	-20.9797	51.7771	Canada's Michael Smith Genome Sciences Centre
s17221	-27.7692	50.0318	Canada's Michael Smith Genome Sciences Centre
s17256	-23.9702	46.6749	Canada's Michael Smith Genome Sciences Centre
s17277	-7.77887	49.3109	Canada's Michael Smith Genome Sciences Centre
s17210	-30.8604	51.7905	Canada's Michael Smith Genome Sciences Centre
s17222	-26.0941	57.0244	Canada's Michael Smith Genome Sciences Centre
s17247	-31.344	47.6079	Canada's Michael Smith Genome Sciences Centre
s17220	-39.6716	70.5648	Canada's Michael Smith Genome Sciences Centre
s17246	3.52349	37.1208	Canada's Michael Smith Genome Sciences Centre
s17265	-76.6311	-18.6751	Baylor College of Medicine
s17235	-2.96261	30.1271	Canada's Michael Smith Genome Sciences Centre
s17231	-14.794	47.9253	Canada's Michael Smith Genome Sciences Centre
s17261	-28.5627	58.7947	Canada's Michael Smith Genome Sciences Centre
s17215	-29.9859	52.5525	Canada's Michael Smith Genome Sciences Centre
s17228	-12.5961	55.8719	Canada's Michael Smith Genome Sciences Centre
s17203	-89.3313	-2.10691	Broad Institute of MIT and Harvard
s17251	-19.3177	51.3158	Canada's Michael Smith Genome Sciences Centre
s17238	-27.6309	41.4838	Canada's Michael Smith Genome Sciences Centre
s17253	-22.6942	44.2732	Canada's Michael Smith Genome Sciences Centre
s17273	-21.1581	44.2615	Canada's Michael Smith Genome Sciences Centre
s17245	-22.8093	42.2545	Canada's Michael Smith Genome Sciences Centre
s17855	-24.4993	51.2968	Canada's Michael Smith Genome Sciences Centre
s17819	-17.0581	52.2272	Canada's Michael Smith Genome Sciences Centre
s17858	-16.5782	44.2479	Canada's Michael Smith Genome Sciences Centre
s17817	-20.2766	-34.4766	Baylor College of Medicine
s17800	-105.675	4.36381	Broad Institute of MIT and Harvard
s17833	-28.3051	60.342	Canada's Michael Smith Genome Sciences Centre
s17840	-29.9896	42.3748	Canada's Michael Smith Genome Sciences Centre
s17853	-13.9128	43.1931	Canada's Michael Smith Genome Sciences Centre
s17850	-10.5954	48.8826	Canada's Michael Smith Genome Sciences Centre
s17828	-35.3922	53.5753	Canada's Michael Smith Genome Sciences Centre
s17845	-16.8628	47.956	Canada's Michael Smith Genome Sciences Centre
s17835	-30.7669	52.8623	Canada's Michael Smith Genome Sciences Centre
s17814	-8.71567	41.9472	Canada's Michael Smith Genome Sciences Centre
s17825	-4.49737	50.1233	Canada's Michael Smith Genome Sciences Centre
s17826	-21.7347	51.1729	Canada's Michael Smith Genome Sciences Centre
s17801	-102.307	-3.27607	Broad Institute of MIT and Harvard
s17812	-21.2124	43.6586	Canada's Michael Smith Genome Sciences Centre
s17821	-11.4996	52.0474	Canada's Michael Smith Genome Sciences Centre
s17816	-22.0898	56.2074	Canada's Michael Smith Genome Sciences Centre
s17808	-27.0395	55.9108	Canada's Michael Smith Genome Sciences Centre
s17822	-62.1461	5.1258	Washington University School of Medicine
s17803	-25.8638	43.0262	Canada's Michael Smith Genome Sciences Centre
s17844	-27.0858	49.6939	Canada's Michael Smith Genome Sciences Centre
s17848	-11.0977	45.9269	Canada's Michael Smith Genome Sciences Centre
s17810	-19.3295	44.1891	Canada's Michael Smith Genome Sciences Centre
s17834	-14.239	40.128	Canada's Michael Smith Genome Sciences Centre
s17837	-11.3708	40.6024	Canada's Michael Smith Genome Sciences Centre
s17854	-4.52612	39.7015	Canada's Michael Smith Genome Sciences Centre
s17852	-87.824	-8.59565	Baylor College of Medicine
s17832	-23.0379	46.0157	Canada's Michael Smith Genome Sciences Centre
s17829	-15.9944	51.103	Canada's Michael Smith Genome Sciences Centre
s17802	-27.8518	56.8444	Canada's Michael Smith Genome Sciences Centre
s17859	-25.0431	63.7929	Canada's Michael Smith Genome Sciences Centre
s17841	-21.6114	48.6993	Canada's Michael Smith Genome Sciences Centre
s17836	-15.8583	-35.1194	Baylor College of Medicine
s17827	-25.4453	44.5662	Canada's Michael Smith Genome Sciences Centre
s17857	-23.0505	37.6048	Canada's Michael Smith Genome Sciences Centre
s17820	-33.1407	50.3095	Canada's Michael Smith Genome Sciences Centre
s17804	-19.5992	53.8608	Canada's Michael Smith Genome Sciences Centre
s17851	-10.0686	42.0724	Canada's Michael Smith Genome Sciences Centre
s17818	-2.77117	59.8502	Canada's Michael Smith Genome Sciences Centre
s17847	-24.493	50.0039	Canada's Michael Smith Genome Sciences Centre
s17849	-17.2329	48.8331	Canada's Michael Smith Genome Sciences Centre
s17830	-18.6686	56.5046	Canada's Michael Smith Genome Sciences Centre
s17807	-25.6591	64.0995	Canada's Michael Smith Genome Sciences Centre
s17843	-21.07	43.064	Canada's Michael Smith Genome Sciences Centre
s17809	-27.9623	50.3806	Canada's Michael Smith Genome Sciences Centre
s17846	-32.2094	59.696	Canada's Michael Smith Genome Sciences Centre
s17815	-16.9685	57.495	Canada's Michael Smith Genome Sciences Centre
s17831	-23.7817	51.1616	Canada's Michael Smith Genome Sciences Centre
s17824	-25.6654	59.6627	Canada's Michael Smith Genome Sciences Centre
s17805	-18.5046	46.3997	Canada's Michael Smith Genome Sciences Centre
s17839	-14.3216	53.3003	Canada's Michael Smith Genome Sciences Centre
s17811	-17.0861	49.3489	Canada's Michael Smith Genome Sciences Centre
s17813	-29.3032	63.8457	Canada's Michael Smith Genome Sciences Centre
s17842	-130.78	14.5965	Broad Institute of MIT and Harvard
s17823	-14.28	48.9385	Canada's Michael Smith Genome Sciences Centre
s17838	-12.1943	47.135	Canada's Michael Smith Genome Sciences Centre
s17856	-25.8121	49.8182	Canada's Michael Smith Genome Sciences Centre
s17806	-24.167	53.168	Canada's Michael Smith Genome Sciences Centre
s17860	-12.3677	47.5996	Canada's Michael Smith Genome Sciences Centre
s17425	-33.9072	54.4415	Canada's Michael Smith Genome Sciences Centre
s17471	-20.7784	45.8472	Canada's Michael Smith Genome Sciences Centre
s17474	-7.33753	53.003	Canada's Michael Smith Genome Sciences Centre
s17413	-27.8952	52.6647	Canada's Michael Smith Genome Sciences Centre
s17455	-15.1451	53.9247	Canada's Michael Smith Genome Sciences Centre
s17445	-26.724	57.2486	Canada's Michael Smith Genome Sciences Centre
s17430	-16.2151	45.5751	Canada's Michael Smith Genome Sciences Centre
s17427	-19.1078	56.4678	Canada's Michael Smith Genome Sciences Centre
s17447	-13.8987	31.9814	Canada's Michael Smith Genome Sciences Centre
s17466	-13.817	45.2032	Canada's Michael Smith Genome Sciences Centre
s17433	-27.4058	54.1584	Canada's Michael Smith Genome Sciences Centre
s17419	-8.13721	45.6966	Canada's Michael Smith Genome Sciences Centre
s17424	-17.4384	61.225	Canada's Michael Smith Genome Sciences Centre
s17408	-90.3022	-3.32389	Broad Institute of MIT and Harvard
s17473	-21.3587	-32.8206	Baylor College of Medicine
s17467	-11.4732	49.6227	Canada's Michael Smith Genome Sciences Centre
s17416	-19.8949	55.2488	Canada's Michael Smith Genome Sciences Centre
s17459	-30.596	50.279	Canada's Michael Smith Genome Sciences Centre
s17428	-25.1543	46.3267	Canada's Michael Smith Genome Sciences Centre
s17420	-19.3437	45.0991	Canada's Michael Smith Genome Sciences Centre
s17469	-22.0109	49.9249	Canada's Michael Smith Genome Sciences Centre
s17453	-23.1908	-34.9567	Baylor College of Medicine
s17462	-19.1814	50.9557	Canada's Michael Smith Genome Sciences Centre
s17457	-12.0698	49.5872	Canada's Michael Smith Genome Sciences Centre
s17477	-20.21	51.0385	Canada's Michael Smith Genome Sciences Centre
s17438	-13.9995	53.1855	Canada's Michael Smith Genome Sciences Centre
s17429	-0.794476	55.6472	Canada's Michael Smith Genome Sciences Centre
s17468	-16.7335	45.9887	Canada's Michael Smith Genome Sciences Centre
s17405	-102.159	-5.56065	Broad Institute of MIT and Harvard
s17449	-17.7371	50.8103	Canada's Michael Smith Genome Sciences Centre
s17475	-13.5262	33.888	Canada's Michael Smith Genome Sciences Centre
s17406	-102.887	-1.28748	Broad Institute of MIT and Harvard
s17421	-20.8112	43.1078	Canada's Michael Smith Genome Sciences Centre
s17434	-18.8862	58.3557	Canada's Michael Smith Genome Sciences Centre
s17465	-43.6029	46.0279	Canada's Michael Smith Genome Sciences Centre
s17443	-32.3743	51.1402	Canada's Michael Smith Genome Sciences Centre
s17476	-15.3139	38.7021	Canada's Michael Smith Genome Sciences Centre
s17410	-93.0182	-2.73622	Broad Institute of MIT and Harvard
s17461	-31.8767	52.5995	Canada's Michael Smith Genome Sciences Centre
s17432	-12.9882	56.0644	Canada's Michael Smith Genome Sciences Centre
s17442	-16.9373	52.6294	Canada's Michael Smith Genome Sciences Centre
s17440	-27.1832	52.152	Canada's Michael Smith Genome Sciences Centre
s17422	-36.2884	51.9945	Canada's Michael Smith Genome Sciences Centre
s17451	-26.1668	48.0559	Canada's Michael Smith Genome Sciences Centre
s17409	-103.252	0.511297	Broad Institute of MIT and Harvard
s17431	-13.4315	52.2343	Canada's Michael Smith Genome Sciences Centre
s17417	-41.4113	63.5093	Canada's Michael Smith Genome Sciences Centre
s17423	-29.4307	62.4372	Canada's Michael Smith Genome Sciences Centre
s17464	-31.2839	43.8263	Canada's Michael Smith Genome Sciences Centre
s17460	-15.5117	52.0421	Canada's Michael Smith Genome Sciences Centre
s17452	-26.7138	54.9336	Canada's Michael Smith Genome Sciences Centre
s17437	-21.1269	50.3648	Canada's Michael Smith Genome Sciences Centre
s17412	-114.256	15.0183	Baylor College of Medicine
s17439	-32.1472	61.4179	Canada's Michael Smith Genome Sciences Centre
s17454	-17.4846	43.5602	Canada's Michael Smith Genome Sciences Centre
s17472	-105.578	-11.3533	Baylor College of Medicine
s17470	-22.5552	51.7875	Canada's Michael Smith Genome Sciences Centre
s17414	-17.9248	54.8063	Canada's Michael Smith Genome Sciences Centre
s17456	-18.1339	51.5609	Canada's Michael Smith Genome Sciences Centre
s17448	-20.9676	49.6656	Canada's Michael Smith Genome Sciences Centre
s17407	-84.5039	-2.65682	Broad Institute of MIT and Harvard
s17435	-27.973	47.0407	Canada's Michael Smith Genome Sciences Centre
s17426	-13.2274	50.0292	Canada's Michael Smith Genome Sciences Centre
s17436	-17.3832	48.4335	Canada's Michael Smith Genome Sciences Centre
s17441	-20.0933	37.0192	Canada's Michael Smith Genome Sciences Centre
s17458	-22.3902	63.1557	Canada's Michael Smith Genome Sciences Centre
s17444	-19.5673	54.465	Canada's Michael Smith Genome Sciences Centre
s17411	-30.0687	48.7524	Canada's Michael Smith Genome Sciences Centre
s17415	-31.205	42.4367	Canada's Michael Smith Genome Sciences Centre
s17418	-19.1579	36.8062	Canada's Michael Smith Genome Sciences Centre
s17446	-30.8778	64.9529	Canada's Michael Smith Genome Sciences Centre
s17450	-20.7268	49.1525	Canada's Michael Smith Genome Sciences Centre
s17463	-118.31	18.0435	Baylor College of Medicine
s17629	-33.8492	50.0414	Canada's Michael Smith Genome Sciences Centre
s17615	-8.69707	38.9307	Canada's Michael Smith Genome Sciences Centre
s17605	-25.5417	58.8907	Canada's Michael Smith Genome Sciences Centre
s17637	-18.4013	42.3797	Canada's Michael Smith Genome Sciences Centre
s17625	-12.9886	46.3555	Canada's Michael Smith Genome Sciences Centre
s17620	-120.596	20.6966	Baylor College of Medicine
s17631	-22.7104	55.1818	Canada's Michael Smith Genome Sciences Centre
s17607	-23.1387	55.0313	Canada's Michael Smith Genome Sciences Centre
s17642	-13.5942	44.2366	Canada's Michael Smith Genome Sciences Centre
s17614	-116.425	-3.57333	Washington University School of Medicine
s17612	-17.6594	45.9858	Canada's Michael Smith Genome Sciences Centre
s17651	-95.0651	7.43356	Washington University School of Medicine
s17617	-32.5461	53.2328	Canada's Michael Smith Genome Sciences Centre
s17610	-14.847	-33.3833	Baylor College of Medicine
s17626	-27.7731	55.984	Canada's Michael Smith Genome Sciences Centre
s17644	-13.6401	48.1471	Canada's Michael Smith Genome Sciences Centre
s17622	-14.6419	36.7208	Canada's Michael Smith Genome Sciences Centre
s17616	-18.2402	46.1183	Canada's Michael Smith Genome Sciences Centre
s17598	-14.0455	56.9912	Canada's Michael Smith Genome Sciences Centre
s17623	-21.0862	32.0987	Canada's Michael Smith Genome Sciences Centre
s17604	-13.3297	48.6868	Canada's Michael Smith Genome Sciences Centre
s17613	-19.5669	70.8173	Canada's Michael Smith Genome Sciences Centre
s17600	-87.6352	-4.89682	Baylor College of Medicine
s17591	-29.7181	58.5826	Canada's Michael Smith Genome Sciences Centre
s17588	-121.328	11.7804	Broad Institute of MIT and Harvard
s17608	-19.1132	48.056	Canada's Michael Smith Genome Sciences Centre
s17609	-30.6512	57.6729	Canada's Michael Smith Genome Sciences Centre
s17635	-11.34	43.9968	Canada's Michael Smith Genome Sciences Centre
s17589	-87.6481	-5.27446	Broad Institute of MIT and Harvard
s17603	-13.2171	49.3742	Canada's Michael Smith Genome Sciences Centre
s17611	-26.2932	49.4414	Canada's Michael Smith Genome Sciences Centre
s17602	-21.7887	49.6678	Canada's Michael Smith Genome Sciences Centre
s17628	-9.61863	46.0624	Canada's Michael Smith Genome Sciences Centre
s17648	-19.9637	57.245	Canada's Michael Smith Genome Sciences Centre
s17634	-17.8873	52.0541	Canada's Michael Smith Genome Sciences Centre
s17640	-7.91708	42.8958	Canada's Michael Smith Genome Sciences Centre
s17636	-14.5861	47.7756	Canada's Michael Smith Genome Sciences Centre
s17645	-20.8239	35.8862	Canada's Michael Smith Genome Sciences Centre
s17606	-35.4865	64.8119	Canada's Michael Smith Genome Sciences Centre
s17599	-19.7033	40.4051	Canada's Michael Smith Genome Sciences Centre
s17597	-36.8792	64.0163	Canada's Michael Smith Genome Sciences Centre
s17595	-23.3714	44.2469	Canada's Michael Smith Genome Sciences Centre
s17630	-20.1229	50.48	Canada's Michael Smith Genome Sciences Centre
s17639	-22.6407	47.2625	Canada's Michael Smith Genome Sciences Centre
s17638	-17.5345	49.4611	Canada's Michael Smith Genome Sciences Centre
s17650	-15.617	38.3062	Canada's Michael Smith Genome Sciences Centre
s17649	-19.0703	50.4248	Canada's Michael Smith Genome Sciences Centre
s17647	-0.114402	42.8739	Canada's Michael Smith Genome Sciences Centre
s17624	-28.0459	53.9627	Canada's Michael Smith Genome Sciences Centre
s17641	-21.8858	41.9848	Canada's Michael Smith Genome Sciences Centre
s17596	-21.0917	53.4473	Canada's Michael Smith Genome Sciences Centre
s17590	-115.102	15.3905	Baylor College of Medicine
s17601	-15.7012	54.1771	Canada's Michael Smith Genome Sciences Centre
s17627	-11.7292	50.5007	Canada's Michael Smith Genome Sciences Centre
s17646	-32.1934	54.9032	Canada's Michael Smith Genome Sciences Centre
s17633	-30.0834	54.8087	Canada's Michael Smith Genome Sciences Centre
s17592	-31.1979	44.3726	Canada's Michael Smith Genome Sciences Centre
s17587	-117.824	8.52835	Broad Institute of MIT and Harvard
s17593	-20.689	45.4291	Canada's Michael Smith Genome Sciences Centre
s17618	-45.0731	67.4188	Canada's Michael Smith Genome Sciences Centre
s17643	-4.97255	40.4215	Canada's Michael Smith Genome Sciences Centre
s17632	-15.1014	56.056	Canada's Michael Smith Genome Sciences Centre
s17621	-31.1467	56.5695	Canada's Michael Smith Genome Sciences Centre
s17619	-22.8263	55.9902	Canada's Michael Smith Genome Sciences Centre
s17594	-31.9841	70.8982	Canada's Michael Smith Genome Sciences Centre
s17764	-21.5678	58.9469	Canada's Michael Smith Genome Sciences Centre
s17793	-17.5454	55.1249	Canada's Michael Smith Genome Sciences Centre
s17787	-18.1676	36.981	Canada's Michael Smith Genome Sciences Centre
s17777	-7.46837	40.4029	Canada's Michael Smith Genome Sciences Centre
s17791	-24.5171	55.5487	Canada's Michael Smith Genome Sciences Centre
s17780	-27.7371	50.1233	Canada's Michael Smith Genome Sciences Centre
s17762	-36.3297	53.6263	Canada's Michael Smith Genome Sciences Centre
s17766	-20.6983	54.1621	Canada's Michael Smith Genome Sciences Centre
s17790	-10.3685	38.7347	Canada's Michael Smith Genome Sciences Centre
s17799	-67.9481	-18.9224	Baylor College of Medicine
s17792	-23.8403	58.261	Canada's Michael Smith Genome Sciences Centre
s17779	-20.1148	52.3503	Canada's Michael Smith Genome Sciences Centre
s17778	-10.0159	45.0308	Canada's Michael Smith Genome Sciences Centre
s17798	-117.673	17.0708	Baylor College of Medicine
s17774	-39.1912	58.8301	Canada's Michael Smith Genome Sciences Centre
s17763	-114.281	20.1615	Baylor College of Medicine
s17781	-20.0429	45.188	Canada's Michael Smith Genome Sciences Centre
s17784	-25.4799	48.4047	Canada's Michael Smith Genome Sciences Centre
s17783	-85.9828	-9.55228	Baylor College of Medicine
s17794	-27.3402	61.9649	Canada's Michael Smith Genome Sciences Centre
s17771	-10.0431	44.0103	Canada's Michael Smith Genome Sciences Centre
s17788	-26.6428	46.7146	Canada's Michael Smith Genome Sciences Centre
s17773	-9.93888	45.6265	Canada's Michael Smith Genome Sciences Centre
s17797	-13.9396	49.7514	Canada's Michael Smith Genome Sciences Centre
s17765	-24.8687	52.8589	Canada's Michael Smith Genome Sciences Centre
s17775	-28.5646	64.7455	Canada's Michael Smith Genome Sciences Centre
s17767	-6.27458	34.339	Canada's Michael Smith Genome Sciences Centre
s17768	-50.3969	60.3829	Canada's Michael Smith Genome Sciences Centre
s17769	-32.6727	65.7095	Canada's Michael Smith Genome Sciences Centre
s17795	-30.8376	48.9234	Canada's Michael Smith Genome Sciences Centre
s17776	-29.6103	-31.5224	Baylor College of Medicine
s17796	-22.5459	-33.1188	Baylor College of Medicine
s17772	-37.1915	72.3615	Canada's Michael Smith Genome Sciences Centre
s17760	-108.03	-0.513834	Broad Institute of MIT and Harvard
s17786	-20.5919	46.9173	Canada's Michael Smith Genome Sciences Centre
s17761	-105.869	1.86007	Broad Institute of MIT and Harvard
s17789	-10.936	49.4564	Canada's Michael Smith Genome Sciences Centre
s17782	-11.9589	41.3691	Canada's Michael Smith Genome Sciences Centre
s17770	-80.2575	-15.7919	Baylor College of Medicine
s17785	-28.7345	53.2979	Canada's Michael Smith Genome Sciences Centre
s18000	-22.0754	51.1887	Canada's Michael Smith Genome Sciences Centre
s17982	-32.3258	63.171	Canada's Michael Smith Genome Sciences Centre
s17978	-126.649	15.0664	Broad Institute of MIT and Harvard
s17989	-25.2287	52.4054	Canada's Michael Smith Genome Sciences Centre
s18011	-4.88492	27.1886	Canada's Michael Smith Genome Sciences Centre
s17993	-22.9456	37.1156	Canada's Michael Smith Genome Sciences Centre
s17985	-15.5828	58.6307	Canada's Michael Smith Genome Sciences Centre
s17980	-132.929	4.94245	Broad Institute of MIT and Harvard
s17987	-47.0303	74.4382	Canada's Michael Smith Genome Sciences Centre
s17979	-48.7976	-29.4364	Baylor College of Medicine
s17990	-25.0065	52.0443	Canada's Michael Smith Genome Sciences Centre
s18012	-16.9894	41.5924	Canada's Michael Smith Genome Sciences Centre
s17996	-3.30166	37.3512	Canada's Michael Smith Genome Sciences Centre
s18002	-26.5893	48.4973	Canada's Michael Smith Genome Sciences Centre
s17994	-26.1654	56.3123	Canada's Michael Smith Genome Sciences Centre
s17983	-23.6758	51.8149	Canada's Michael Smith Genome Sciences Centre
s17998	-15.7376	52.3294	Canada's Michael Smith Genome Sciences Centre
s18005	-92.0167	-14.3393	Baylor College of Medicine
s17984	-13.3645	47.2324	Canada's Michael Smith Genome Sciences Centre
s17992	-27.061	60.9804	Canada's Michael Smith Genome Sciences Centre
s17991	-20.4678	62.6809	Canada's Michael Smith Genome Sciences Centre
s17995	-27.1484	56.0604	Canada's Michael Smith Genome Sciences Centre
s18009	-21.3334	58.7775	Canada's Michael Smith Genome Sciences Centre
s17981	-11.073	54.073	Canada's Michael Smith Genome Sciences Centre
s18004	-103.362	7.16252	Baylor College of Medicine
s17988	-34.9996	51.7385	Canada's Michael Smith Genome Sciences Centre
s18015	-87.6071	-19.5912	Baylor College of Medicine
s17997	-19.4231	55.865	Canada's Michael Smith Genome Sciences Centre
s17999	-24.6615	51.3135	Canada's Michael Smith Genome Sciences Centre
s18016	7.24813	36.5648	Canada's Michael Smith Genome Sciences Centre
s18013	-23.6679	51.5795	Canada's Michael Smith Genome Sciences Centre
s18006	-17.2352	61.8616	Canada's Michael Smith Genome Sciences Centre
s18008	-14.4625	44.8158	Canada's Michael Smith Genome Sciences Centre
s18010	-16.3624	49.9918	Canada's Michael Smith Genome Sciences Centre
s18003	-10.2074	41.1063	Canada's Michael Smith Genome Sciences Centre
s18001	-32.753	47.4382	Canada's Michael Smith Genome Sciences Centre
s17986	-26.7961	72.8871	Canada's Michael Smith Genome Sciences Centre
s18014	-22.4883	37.7769	Canada's Michael Smith Genome Sciences Centre
s18007	-24.8501	44.4918	Canada's Michael Smith Genome Sciences Centre
s18078	-13.6015	42.9472	Canada's Michael Smith Genome Sciences Centre
s18066	-19.7231	52.7134	Canada's Michael Smith Genome Sciences Centre
s18022	-105.963	1.73736	Broad Institute of MIT and Harvard
s18054	-12.1851	45.8298	Canada's Michael Smith Genome Sciences Centre
s18049	-29.5242	49.1702	Canada's Michael Smith Genome Sciences Centre
s18074	-31.2863	53.884	Canada's Michael Smith Genome Sciences Centre
s18029	-31.881	54.9838	Canada's Michael Smith Genome Sciences Centre
s18037	-35.4733	61.6906	Canada's Michael Smith Genome Sciences Centre
s18017	-97.4704	-2.26558	Washington University School of Medicine
s18059	-23.8221	62.7478	Canada's Michael Smith Genome Sciences Centre
s18067	-15.0198	46.1725	Canada's Michael Smith Genome Sciences Centre
s18025	-26.4162	57.3573	Canada's Michael Smith Genome Sciences Centre
s18018	-114.998	7.8361	Broad Institute of MIT and Harvard
s18019	-100.395	-0.968579	Broad Institute of MIT and Harvard
s18021	-106.364	0.36977	Broad Institute of MIT and Harvard
s18050	-30.7178	49.4239	Canada's Michael Smith Genome Sciences Centre
s18044	-7.24627	35.4149	Canada's Michael Smith Genome Sciences Centre
s18051	-20.5545	46.6866	Canada's Michael Smith Genome Sciences Centre
s18040	-5.98154	53.3934	Canada's Michael Smith Genome Sciences Centre
s18077	-21.5116	49.8342	Canada's Michael Smith Genome Sciences Centre
s18062	-29.785	59.1143	Canada's Michael Smith Genome Sciences Centre
s18057	-27.7524	54.9554	Canada's Michael Smith Genome Sciences Centre
s18080	-21.6443	42.4321	Canada's Michael Smith Genome Sciences Centre
s18027	-17.0945	54.6508	Canada's Michael Smith Genome Sciences Centre
s18053	-18.6472	60.7816	Canada's Michael Smith Genome Sciences Centre
s18026	-46.5445	60.6076	Canada's Michael Smith Genome Sciences Centre
s18052	-22.077	51.6578	Canada's Michael Smith Genome Sciences Centre
s18030	-32.3544	49.0353	Canada's Michael Smith Genome Sciences Centre
s18075	-24.6377	54.7356	Canada's Michael Smith Genome Sciences Centre
s18041	-16.0459	44.6486	Canada's Michael Smith Genome Sciences Centre
s18023	-108.291	1.28796	Broad Institute of MIT and Harvard
s18031	-41.5247	59.3868	Canada's Michael Smith Genome Sciences Centre
s18061	-20.3649	-34.0256	Baylor College of Medicine
s18033	-14.8244	44.9177	Canada's Michael Smith Genome Sciences Centre
s18034	-24.9016	-35.0718	Baylor College of Medicine
s18070	-110.349	11.9233	Baylor College of Medicine
s18076	-24.3	52.0925	Canada's Michael Smith Genome Sciences Centre
s18045	-19.5532	52.8029	Canada's Michael Smith Genome Sciences Centre
s18064	-16.143	51.1637	Canada's Michael Smith Genome Sciences Centre
s18024	-20.7892	57.013	Canada's Michael Smith Genome Sciences Centre
s18073	-32.4156	48.9713	Canada's Michael Smith Genome Sciences Centre
s18039	-17.1849	38.6947	Canada's Michael Smith Genome Sciences Centre
s18035	-21.5777	56.9023	Canada's Michael Smith Genome Sciences Centre
s18079	-16.71	48.027	Canada's Michael Smith Genome Sciences Centre
s18063	-18.6609	51.2579	Canada's Michael Smith Genome Sciences Centre
s18020	-89.7289	-6.71777	Broad Institute of MIT and Harvard
s18069	-12.7064	48.2631	Canada's Michael Smith Genome Sciences Centre
s18058	-19.1371	43.5627	Canada's Michael Smith Genome Sciences Centre
s18028	-49.312	65.7595	Canada's Michael Smith Genome Sciences Centre
s18072	-23.1513	57.4651	Canada's Michael Smith Genome Sciences Centre
s18068	-16.5567	46.1617	Canada's Michael Smith Genome Sciences Centre
s18056	-22.7268	53.7428	Canada's Michael Smith Genome Sciences Centre
s18038	-32.045	51.78	Canada's Michael Smith Genome Sciences Centre
s18071	-15.2044	53.197	Canada's Michael Smith Genome Sciences Centre
s18047	-20.0244	58.4367	Canada's Michael Smith Genome Sciences Centre
s18048	-15.9111	38.2345	Canada's Michael Smith Genome Sciences Centre
s18046	-10.6911	38.5987	Canada's Michael Smith Genome Sciences Centre
s18043	-24.4526	56.0803	Canada's Michael Smith Genome Sciences Centre
s18036	-14.6672	-35.7919	Baylor College of Medicine
s18060	-16.0895	47.315	Canada's Michael Smith Genome Sciences Centre
s18042	-25.0089	45.3529	Canada's Michael Smith Genome Sciences Centre
s18055	-83.3125	-6.55947	Baylor College of Medicine
s18032	-35.7415	58.1439	Canada's Michael Smith Genome Sciences Centre
s18065	-16.7948	53.3564	Canada's Michael Smith Genome Sciences Centre
s18149	-5.82292	43.792	Canada's Michael Smith Genome Sciences Centre
s18147	-102.725	-5.378	Washington University School of Medicine
s18150	-109.693	37.381	Washington University School of Medicine
s18148	-23.7896	47.9544	Canada's Michael Smith Genome Sciences Centre
s17182	-15.2148	42.6529	Canada's Michael Smith Genome Sciences Centre
s17196	-78.0623	-1.61361	Baylor College of Medicine
s17197	-23.2948	49.3758	Canada's Michael Smith Genome Sciences Centre
s17185	-34.63	53.372	Canada's Michael Smith Genome Sciences Centre
s17170	-111.366	12.4859	Baylor College of Medicine
s17178	-16.6391	47.1569	Canada's Michael Smith Genome Sciences Centre
s17174	-12.2498	49.228	Canada's Michael Smith Genome Sciences Centre
s17183	-31.978	59.1487	Canada's Michael Smith Genome Sciences Centre
s17176	-31.4797	57.3929	Canada's Michael Smith Genome Sciences Centre
s17202	-19.2855	47.4398	Canada's Michael Smith Genome Sciences Centre
s17192	-3.10538	39.6239	Canada's Michael Smith Genome Sciences Centre
s17167	-110.05	6.09477	Broad Institute of MIT and Harvard
s17189	-20.6237	47.2513	Canada's Michael Smith Genome Sciences Centre
s17190	-16.6365	48.1141	Canada's Michael Smith Genome Sciences Centre
s17175	-91.0099	0.734339	Baylor College of Medicine
s17180	-41.2599	-31.4419	Baylor College of Medicine
s17194	-16.7291	50.5194	Canada's Michael Smith Genome Sciences Centre
s17171	-21.6834	65.2879	Canada's Michael Smith Genome Sciences Centre
s17168	-21.2008	43.5912	Canada's Michael Smith Genome Sciences Centre
s17165	-103.538	0.533194	Broad Institute of MIT and Harvard
s17191	-70.69	-18.9163	Baylor College of Medicine
s17173	-4.25356	58.2231	Canada's Michael Smith Genome Sciences Centre
s17188	-31.1945	51.699	Canada's Michael Smith Genome Sciences Centre
s17201	-23.9419	39.8172	Canada's Michael Smith Genome Sciences Centre
s17177	-26.115	53.061	Canada's Michael Smith Genome Sciences Centre
s17169	-22.6949	49.5526	Canada's Michael Smith Genome Sciences Centre
s17187	-19.1489	43.4377	Canada's Michael Smith Genome Sciences Centre
s17164	-119.502	9.67728	Broad Institute of MIT and Harvard
s17184	-31.5445	48.836	Canada's Michael Smith Genome Sciences Centre
s17186	-21.5794	50.5805	Canada's Michael Smith Genome Sciences Centre
s17199	-24.1262	-35.0902	Baylor College of Medicine
s17181	-6.9887	52.3584	Canada's Michael Smith Genome Sciences Centre
s17179	-17.9188	38.4898	Canada's Michael Smith Genome Sciences Centre
s17198	-18.569	50.8054	Canada's Michael Smith Genome Sciences Centre
s17193	-28.4175	-33.0091	Baylor College of Medicine
s17200	-11.1898	55.021	Canada's Michael Smith Genome Sciences Centre
s17166	-94.4041	-0.519522	Broad Institute of MIT and Harvard
s17195	-79.2131	-18.5156	Baylor College of Medicine
s17384	-12.3604	55.5991	Canada's Michael Smith Genome Sciences Centre
s17392	-29.3618	56.4801	Canada's Michael Smith Genome Sciences Centre
s17357	-17.653	45.7388	Canada's Michael Smith Genome Sciences Centre
s17360	-25.5889	56.6275	Canada's Michael Smith Genome Sciences Centre
s17388	-20.3893	51.6334	Canada's Michael Smith Genome Sciences Centre
s17394	-19.6617	48.8995	Canada's Michael Smith Genome Sciences Centre
s17376	-22.8799	51.0368	Canada's Michael Smith Genome Sciences Centre
s17367	-3.58558	45.1145	Canada's Michael Smith Genome Sciences Centre
s17400	-18.5073	46.1631	Canada's Michael Smith Genome Sciences Centre
s17373	-27.7576	53.8285	Canada's Michael Smith Genome Sciences Centre
s17391	-81.8154	-15.5333	Baylor College of Medicine
s17368	-34.0476	63.8826	Canada's Michael Smith Genome Sciences Centre
s17359	-14.1923	61.9793	Canada's Michael Smith Genome Sciences Centre
s17397	-34.8405	48.8618	Canada's Michael Smith Genome Sciences Centre
s17358	-17.4044	59.5575	Canada's Michael Smith Genome Sciences Centre
s17387	-36.4404	59.9104	Canada's Michael Smith Genome Sciences Centre
s17365	-10.314	44.6892	Canada's Michael Smith Genome Sciences Centre
s17379	-33.9471	58.0654	Canada's Michael Smith Genome Sciences Centre
s17354	-20.0428	58.6619	Canada's Michael Smith Genome Sciences Centre
s17386	-9.92539	50.3669	Canada's Michael Smith Genome Sciences Centre
s17362	-15.3246	41.482	Canada's Michael Smith Genome Sciences Centre
s17395	-89.1666	-8.09022	Baylor College of Medicine
s17401	-13.5323	47.5544	Canada's Michael Smith Genome Sciences Centre
s17348	-89.7034	-8.08588	Broad Institute of MIT and Harvard
s17366	-31.8713	50.055	Canada's Michael Smith Genome Sciences Centre
s17377	-26.6259	52.2297	Canada's Michael Smith Genome Sciences Centre
s17361	-30.2532	57.8158	Canada's Michael Smith Genome Sciences Centre
s17383	-8.82292	42.5744	Canada's Michael Smith Genome Sciences Centre
s17385	-28.9597	63.3536	Canada's Michael Smith Genome Sciences Centre
s17382	-27.7582	51.8367	Canada's Michael Smith Genome Sciences Centre
s17375	-13.366	41.805	Canada's Michael Smith Genome Sciences Centre
s17355	-4.86448	29.0209	Canada's Michael Smith Genome Sciences Centre
s17390	-26.448	-33.3602	Baylor College of Medicine
s17378	-34.218	55.8117	Canada's Michael Smith Genome Sciences Centre
s17389	-82.8785	-5.26558	Baylor College of Medicine
s17371	-15.0494	52.3374	Canada's Michael Smith Genome Sciences Centre
s17372	-12.5512	33.1566	Canada's Michael Smith Genome Sciences Centre
s17369	-27.0789	60.8235	Canada's Michael Smith Genome Sciences Centre
s17404	-15.0529	51.2757	Canada's Michael Smith Genome Sciences Centre
s17350	-101.646	2.23286	Broad Institute of MIT and Harvard
s17352	-9.27897	52.9592	Canada's Michael Smith Genome Sciences Centre
s17364	-20.4795	51.1472	Canada's Michael Smith Genome Sciences Centre
s17403	-30.9402	58.816	Canada's Michael Smith Genome Sciences Centre
s17381	-27.0649	52.4367	Canada's Michael Smith Genome Sciences Centre
s17363	-33.2619	53.6756	Canada's Michael Smith Genome Sciences Centre
s17353	-29.9438	56.9517	Canada's Michael Smith Genome Sciences Centre
s17402	-20.5102	54.8097	Canada's Michael Smith Genome Sciences Centre
s17380	-30.8068	50.1601	Canada's Michael Smith Genome Sciences Centre
s17356	-28.8359	57.7633	Canada's Michael Smith Genome Sciences Centre
s17398	-15.7461	48.5588	Canada's Michael Smith Genome Sciences Centre
s17349	-97.1571	-1.09214	Broad Institute of MIT and Harvard
s17396	-25.3792	50.3445	Canada's Michael Smith Genome Sciences Centre
s17399	-46.1634	50.1437	Canada's Michael Smith Genome Sciences Centre
s17370	-28.5788	56.0195	Canada's Michael Smith Genome Sciences Centre
s17374	-15.1637	48.1693	Canada's Michael Smith Genome Sciences Centre
s17393	-12.0139	46.2601	Canada's Michael Smith Genome Sciences Centre
s17351	-112.514	6.89138	Broad Institute of MIT and Harvard
s16790	-108.81	-4.11847	Baylor College of Medicine
s16818	46.6953	-9.68697	University of North Carolina
s16804	50.7776	-13.6313	University of North Carolina
s16846	41.2323	-5.9914	University of North Carolina
s16788	-107.902	-2.70322	Baylor College of Medicine
s16825	44.0065	-2.32065	University of North Carolina
s16806	48.8129	-8.64033	University of North Carolina
s16773	-91.1953	-6.74179	Baylor College of Medicine
s16785	-92.0304	-7.26559	Baylor College of Medicine
s16791	-106.879	5.08062	Baylor College of Medicine
s16841	35.2224	-0.377051	University of North Carolina
s16779	-95.311	-9.86835	Baylor College of Medicine
s16774	-96.7816	-10.4884	Baylor College of Medicine
s16840	46.7697	-3.54202	University of North Carolina
s16826	24.4697	12.3752	University of North Carolina
s16811	32.0517	-5.46633	University of North Carolina
s16815	38.3676	-6.96766	University of North Carolina
s16776	-112.956	-2.68992	Baylor College of Medicine
s16795	33.3887	-2.08841	University of North Carolina
s16830	45.9173	-8.73822	University of North Carolina
s16798	22.4993	4.21015	University of North Carolina
s16796	59.4842	-22.4883	University of North Carolina
s16834	30.8742	-10.041	University of North Carolina
s16836	54.6739	-16.9243	University of North Carolina
s16837	63.3951	-24.9102	University of North Carolina
s16844	36.2045	-9.42773	University of North Carolina
s16835	45.5054	-0.776408	University of North Carolina
s16783	-109.05	-1.97655	Baylor College of Medicine
s16821	30.8915	0.548101	University of North Carolina
s16797	38.9064	4.08504	University of North Carolina
s16778	-91.0704	-7.7619	Baylor College of Medicine
s16812	36.8458	-8.02283	University of North Carolina
s16813	34.5841	-11.7947	University of North Carolina
s16809	37.7704	-12.6589	University of North Carolina
s16823	38.0042	-7.17171	University of North Carolina
s16789	-124.858	21.3446	Baylor College of Medicine
s16827	27.3839	9.37661	University of North Carolina
s16838	59.6348	-19.439	University of North Carolina
s16845	44.239	-13.5291	University of North Carolina
s16822	36.9687	-1.11772	University of North Carolina
s16780	-93.7137	-8.807	Baylor College of Medicine
s16805	39.9995	-7.59326	University of North Carolina
s16777	-92.4566	-11.9511	Baylor College of Medicine
s16816	26.4591	-5.9641	University of North Carolina
s16781	-112.556	-1.09386	Baylor College of Medicine
s16800	38.4709	-7.57035	University of North Carolina
s16829	38.0129	-0.33453	University of North Carolina
s16828	33.9426	10.2541	University of North Carolina
s16810	28.9927	-4.15904	University of North Carolina
s16786	-110.722	-5.66946	Baylor College of Medicine
s16801	30.2263	5.26181	University of North Carolina
s16843	54.9955	-19.7618	University of North Carolina
s16807	34.7076	-5.59773	University of North Carolina
s16803	38.3828	-9.32609	University of North Carolina
s16819	35.4149	-4.09738	University of North Carolina
s16793	36.3999	3.48411	University of North Carolina
s16794	45.304	-10.611	University of North Carolina
s16808	39.4486	-6.52141	University of North Carolina
s16784	-122.735	17.9464	Baylor College of Medicine
s16820	42.9541	-3.20119	University of North Carolina
s16831	33.3824	-0.632413	University of North Carolina
s16799	22.0025	2.7974	University of North Carolina
s16842	50.3679	-8.90738	University of North Carolina
s16782	-92.9467	-8.67568	Baylor College of Medicine
s16839	41.8527	1.0167	University of North Carolina
s16832	34.3801	-2.89688	University of North Carolina
s16833	23.6715	2.11254	University of North Carolina
s16787	-108.302	-3.40116	Baylor College of Medicine
s16824	20.8063	3.46311	University of North Carolina
s16814	40.7269	-8.97965	University of North Carolina
s16802	44.8107	-9.71856	University of North Carolina
s16775	-92.5226	-10.4277	Baylor College of Medicine
s16792	28.094	-7.00586	University of North Carolina
s16817	48.2576	-13.3813	University of North Carolina
s16772	-105.066	-1.54757	Baylor College of Medicine
s16933	44.6718	-2.19305	University of North Carolina
s16963	47.8124	-12.169	University of North Carolina
s16924	48.3121	-9.65935	University of North Carolina
s16858	-94.7125	-12.1835	Baylor College of Medicine
s16889	31.824	-4.28902	University of North Carolina
s16932	26.1493	8.95884	University of North Carolina
s16860	-88.3999	-10.9597	Baylor College of Medicine
s16923	32.6235	4.74291	University of North Carolina
s16958	49.6603	-10.5727	University of North Carolina
s16946	44.6419	-9.28567	University of North Carolina
s16894	23.9291	6.99629	University of North Carolina
s16918	31.1168	6.05541	University of North Carolina
s16929	46.8003	0.170425	University of North Carolina
s16969	34.9476	-4.86781	University of North Carolina
s16848	-124.819	21.91	Baylor College of Medicine
s16906	29.5037	-6.22532	University of North Carolina
s16899	40.086	-12.6102	University of North Carolina
s16877	47.3756	-9.06303	University of North Carolina
s16902	45.138	-8.83365	University of North Carolina
s16870	34.4209	-5.5914	University of North Carolina
s16920	31.925	-2.87614	University of North Carolina
s16966	31.8361	-4.22985	University of North Carolina
s16917	39.3931	-4.80892	University of North Carolina
s16919	27.9073	7.28424	University of North Carolina
s16930	34.9983	7.34533	University of North Carolina
s16941	46.2864	-8.58913	University of North Carolina
s16849	-93.4237	-6.84988	Baylor College of Medicine
s16868	17.4152	3.80608	University of North Carolina
s16862	-94.5411	-9.00914	Baylor College of Medicine
s16879	32.0337	-2.27704	University of North Carolina
s16900	48.4828	-18.0527	University of North Carolina
s16953	33.1324	-6.95178	University of North Carolina
s16910	43.6348	-13.1611	University of North Carolina
s16943	33.7033	-6.75074	University of North Carolina
s16922	37.79	-2.95732	University of North Carolina
s16874	52.5406	-10.3076	University of North Carolina
s16957	35.2007	-5.12615	University of North Carolina
s16850	-106.007	-6.15009	Baylor College of Medicine
s16925	37.8319	-7.21816	University of North Carolina
s16961	46.7095	-9.99823	University of North Carolina
s16876	36.39	-0.173233	University of North Carolina
s16875	33.1878	-1.04778	University of North Carolina
s16904	46.433	-10.1335	University of North Carolina
s16869	33.1978	2.14317	University of North Carolina
s16856	-113.422	5.2982	Baylor College of Medicine
s16926	45.4371	-1.45842	University of North Carolina
s16881	22.0514	-4.91734	University of North Carolina
s16954	45.7223	-9.19807	University of North Carolina
s16891	24.1744	-3.84941	University of North Carolina
s16967	40.3978	-8.08059	University of North Carolina
s16857	-113.607	0.908725	Baylor College of Medicine
s16892	38.6543	-9.02849	University of North Carolina
s16915	31.6076	-9.07701	University of North Carolina
s16942	26.313	0.672725	University of North Carolina
s16937	46.238	-10.4936	University of North Carolina
s16935	31.8513	-2.30202	University of North Carolina
s16903	0.47287	26.5978	University of North Carolina
s16962	45.375	-7.17751	University of North Carolina
s16847	-97.937	-4.58932	Baylor College of Medicine
s16880	19.1026	-5.89646	University of North Carolina
s16912	16.4242	6.02105	University of North Carolina
s16893	37.1021	-9.29793	University of North Carolina
s16944	37.5417	-7.76984	University of North Carolina
s16863	-93.4519	-8.00353	Baylor College of Medicine
s16940	32.5125	-6.73171	University of North Carolina
s16964	48.7173	-15.7828	University of North Carolina
s16901	39.026	-5.78034	University of North Carolina
s16965	26.6911	8.14068	University of North Carolina
s16897	37.5753	-7.9518	University of North Carolina
s16855	-113.235	1.53375	Baylor College of Medicine
s16871	18.7265	4.77012	University of North Carolina
s16872	22.8013	9.59312	University of North Carolina
s16951	14.8576	6.87923	University of North Carolina
s16852	-110.844	-1.80429	Baylor College of Medicine
s16865	-126.339	23.1527	Baylor College of Medicine
s16886	23.9426	5.70829	University of North Carolina
s16948	54.7844	-11.2413	University of North Carolina
s16907	26.1283	7.90803	University of North Carolina
s16959	42.3122	-5.9843	University of North Carolina
s16960	43.1752	-9.50181	University of North Carolina
s16864	-102.74	-5.99716	Baylor College of Medicine
s16945	49.3152	-15.8485	University of North Carolina
s16861	-122.74	15.478	Baylor College of Medicine
s16887	31.2697	1.47743	University of North Carolina
s16949	57.5965	-17.3805	University of North Carolina
s16908	36.4162	-7.50089	University of North Carolina
s16905	47.5785	-9.60272	University of North Carolina
s16955	42.9202	-4.99338	University of North Carolina
s16890	39.0118	-4.06028	University of North Carolina
s16867	40.6671	-2.10539	University of North Carolina
s16928	44.0113	5.50747	University of North Carolina
s16888	32.3383	-5.51089	University of North Carolina
s16898	44.6039	-17.7819	University of North Carolina
s16916	48.6465	-16.6182	University of North Carolina
s16884	25.7886	-8.48497	University of North Carolina
s16896	34.9826	-6.86735	University of North Carolina
s16956	47.3287	-13.1642	University of North Carolina
s16853	-87.5146	-8.98381	Baylor College of Medicine
s16950	49.5851	-10.6813	University of North Carolina
s16909	38.7242	-8.44263	University of North Carolina
s16927	25.7536	10.1425	University of North Carolina
s16885	28.7176	-2.04769	University of North Carolina
s16914	33.6828	-10.3261	University of North Carolina
s16859	-94.7618	-9.7407	Baylor College of Medicine
s16873	40.6609	-10.3476	University of North Carolina
s16952	35.1798	-9.98345	University of North Carolina
s16866	40.3035	-5.73234	University of North Carolina
s16936	46.8403	-14.035	University of North Carolina
s16913	35.495	-11.7425	University of North Carolina
s16939	39.4509	-10.2893	University of North Carolina
s16911	36.1773	-10.4497	University of North Carolina
s16854	-110.253	-0.0770754	Baylor College of Medicine
s16968	36.5295	-4.26166	University of North Carolina
s16883	40.7698	-8.5879	University of North Carolina
s16931	36.4397	3.8344	University of North Carolina
s16878	28.0382	2.73829	University of North Carolina
s16882	48.1974	-12.4212	University of North Carolina
s16851	-104.723	-4.36289	Baylor College of Medicine
s16947	53.8008	-15.3557	University of North Carolina
s16895	18.1965	1.86821	University of North Carolina
s16655	54.5256	-17.9032	University of North Carolina
s16636	34.7239	0.221872	University of North Carolina
s16584	-93.4256	-6.98497	Baylor College of Medicine
s16635	31.0142	5.19472	University of North Carolina
s16657	47.6078	-11.2558	University of North Carolina
s16622	16.5295	10.5915	University of North Carolina
s16644	49.3839	-4.36888	University of North Carolina
s16593	-106.707	-2.28418	Baylor College of Medicine
s16625	42.8024	0.627933	University of North Carolina
s16606	40.5735	1.62943	University of North Carolina
s16640	40.5118	-1.45148	University of North Carolina
s16628	24.1263	-0.272621	University of North Carolina
s16633	39.8958	-13.8304	University of North Carolina
s16596	-91.011	-8.19185	Baylor College of Medicine
s16602	26.7826	8.7048	University of North Carolina
s16592	-111.297	-3.03246	Baylor College of Medicine
s16634	45.3834	-13.3631	University of North Carolina
s16667	66.515	-22.4987	University of North Carolina
s16654	58.0088	-19.2315	University of North Carolina
s16639	33.3486	7.55539	University of North Carolina
s16641	40.7507	4.40575	University of North Carolina
s16601	17.4572	9.21255	University of North Carolina
s16630	30.5765	-5.81293	University of North Carolina
s16669	54.6048	-16.7376	University of North Carolina
s16580	-112.036	5.25177	Baylor College of Medicine
s16666	41.8583	0.889806	University of North Carolina
s16645	31.4311	-4.18371	University of North Carolina
s16620	43.5316	-5.38612	University of North Carolina
s16618	28.9931	0.6499	University of North Carolina
s16586	-111.809	-2.13631	Baylor College of Medicine
s16587	-89.8923	-3.48325	Baylor College of Medicine
s16608	20.2616	0.506919	University of North Carolina
s16627	46.4971	-15.2689	University of North Carolina
s16595	-90.1007	-6.7742	Baylor College of Medicine
s16638	35.9372	-1.36281	University of North Carolina
s16632	43.5232	-10.1285	University of North Carolina
s16664	39.2758	-8.17919	University of North Carolina
s16653	32.1095	1.47526	University of North Carolina
s16591	-110.258	-4.49984	Baylor College of Medicine
s16615	47.1492	-8.56124	University of North Carolina
s16623	50.636	-10.8605	University of North Carolina
s16612	32.253	3.16935	University of North Carolina
s16585	-109.53	-5.62743	Baylor College of Medicine
s16611	36.4425	3.53609	University of North Carolina
s16647	38.9998	-3.9668	University of North Carolina
s16651	47.2923	-14.1812	University of North Carolina
s16590	-89.1143	-7.75976	Baylor College of Medicine
s16650	41.8343	-11.8925	University of North Carolina
s16619	36.0335	-5.52817	University of North Carolina
s16642	30.9659	1.55475	University of North Carolina
s16600	19.3867	3.37363	University of North Carolina
s16665	40.3982	-7.88523	University of North Carolina
s16610	39.0174	-3.39633	University of North Carolina
s16629	30.3693	-5.01982	University of North Carolina
s16663	34.5279	-0.924795	University of North Carolina
s16617	42.6707	-8.08033	University of North Carolina
s16659	33.7993	-10.2766	University of North Carolina
s16597	-92.6036	-11.3379	Baylor College of Medicine
s16649	34.3901	4.36747	University of North Carolina
s16599	48.2359	-10.2152	University of North Carolina
s16631	38.4251	-11.0262	University of North Carolina
s16607	9.19934	14.2769	University of North Carolina
s16660	30.0374	-1.12327	University of North Carolina
s16668	36.7669	-11.263	University of North Carolina
s16616	35.1032	-4.8326	University of North Carolina
s16609	38.9543	-4.39845	University of North Carolina
s16583	-93.1943	-10.0114	Baylor College of Medicine
s16621	42.1125	-9.41844	University of North Carolina
s16605	49.8311	-18.3036	University of North Carolina
s16582	-107.896	-4.23813	Baylor College of Medicine
s16658	53.5786	-13.9777	University of North Carolina
s16589	-112.496	-4.3825	Baylor College of Medicine
s16662	49.3951	-13.0697	University of North Carolina
s16614	43.7139	-8.68432	University of North Carolina
s16598	-101.344	-0.349263	Baylor College of Medicine
s16643	38.3474	-5.85714	University of North Carolina
s16588	-128.051	22.9726	Baylor College of Medicine
s16637	37.3324	0.0879947	University of North Carolina
s16594	-87.6381	-5.01622	Baylor College of Medicine
s16613	38.0938	-7.30283	University of North Carolina
s16652	31.5385	-10.2947	University of North Carolina
s16581	-104.811	-2.09936	Baylor College of Medicine
s16661	20.9813	2.11263	University of North Carolina
s16603	41.2871	-5.25655	University of North Carolina
s16648	43.4067	-12.0566	University of North Carolina
s16624	38.1542	-6.81831	University of North Carolina
s16626	36.9008	-6.4186	University of North Carolina
s16604	41.8664	-18.4205	University of North Carolina
s16656	56.4632	-15.3286	University of North Carolina
s16771	23.3952	10.6726	University of North Carolina
s16700	42.0922	-0.821797	University of North Carolina
s16687	-93.2027	-12.523	Baylor College of Medicine
s16704	33.6559	-3.60226	University of North Carolina
s16753	25.2761	7.19983	University of North Carolina
s16763	30.0142	-7.04777	University of North Carolina
s16766	51.5738	-8.29595	University of North Carolina
s16702	21.7573	6.93364	University of North Carolina
s16672	-105.592	-4.78802	Baylor College of Medicine
s16729	46.7529	-11.7713	University of North Carolina
s16767	47.5835	-12.0292	University of North Carolina
s16743	23.8443	4.35234	University of North Carolina
s16705	30.5091	1.69446	University of North Carolina
s16693	35.3024	-3.32063	University of North Carolina
s16681	-86.1034	-8.88538	Baylor College of Medicine
s16757	61.4595	-21.5802	University of North Carolina
s16726	42.2181	-9.84591	University of North Carolina
s16751	34.0629	2.77069	University of North Carolina
s16711	24.2708	-0.0775823	University of North Carolina
s16674	-91.7836	-7.09771	Baylor College of Medicine
s16734	50.4276	-13.4209	University of North Carolina
s16765	47.9878	-8.98812	University of North Carolina
s16699	52.3323	-17.3892	University of North Carolina
s16761	51.1844	-11.2344	University of North Carolina
s16739	47.3167	-8.27337	University of North Carolina
s16762	37.7503	-6.56235	University of North Carolina
s16703	27.2352	5.17516	University of North Carolina
s16724	36.1569	-8.44826	University of North Carolina
s16732	50.9399	-8.57354	University of North Carolina
s16675	-107.775	-5.447	Baylor College of Medicine
s16748	42.9242	-1.7515	University of North Carolina
s16738	24.5346	-2.70377	University of North Carolina
s16717	40.7134	-14.8436	University of North Carolina
s16727	35.2826	-10.0805	University of North Carolina
s16770	44.4806	-18.1765	University of North Carolina
s16737	14.3703	9.03819	University of North Carolina
s16696	32.8189	4.0048	University of North Carolina
s16756	37.5585	-3.27897	University of North Carolina
s16746	32.5774	6.3484	University of North Carolina
s16712	41.8572	-8.00486	University of North Carolina
s16670	-107.276	-3.00444	Baylor College of Medicine
s16714	32.7606	-4.22365	University of North Carolina
s16733	49.7082	-13.794	University of North Carolina
s16676	-104.314	-4.29316	Baylor College of Medicine
s16760	46.9495	-14.4177	University of North Carolina
s16677	-89.6244	-9.50082	Baylor College of Medicine
s16716	40.4407	-4.64141	University of North Carolina
s16745	33.3149	2.75539	University of North Carolina
s16685	-119.605	16.36	Baylor College of Medicine
s16749	35.1408	-9.58524	University of North Carolina
s16683	-91.9226	-12.1462	Baylor College of Medicine
s16758	55.928	-15.4239	University of North Carolina
s16754	29.5625	2.71609	University of North Carolina
s16688	-104.818	-5.00942	Baylor College of Medicine
s16671	-94.4606	-8.39104	Baylor College of Medicine
s16718	46.4882	-3.8046	University of North Carolina
s16698	57.6737	-21.1809	University of North Carolina
s16694	32.2025	-3.07948	University of North Carolina
s16713	23.526	-5.25196	University of North Carolina
s16701	28.7594	5.55088	University of North Carolina
s16755	34.2065	-2.34365	University of North Carolina
s16750	35.8143	-1.28555	University of North Carolina
s16686	-109.399	-5.10062	Baylor College of Medicine
s16723	45.9857	-11.5389	University of North Carolina
s16720	44.6093	2.02285	University of North Carolina
s16769	45.1766	-7.3827	University of North Carolina
s16679	-95.4606	-8.52386	Baylor College of Medicine
s16689	-98.1379	2.43171	Baylor College of Medicine
s16697	58.2451	-18.9449	University of North Carolina
s16742	28.6214	4.95266	University of North Carolina
s16678	-92.4849	-8.78751	Baylor College of Medicine
s16690	-110.425	-4.25641	Baylor College of Medicine
s16709	31.283	-1.85191	University of North Carolina
s16735	39.1489	-4.73294	University of North Carolina
s16740	42.9597	-8.36896	University of North Carolina
s16719	40.7783	-3.09748	University of North Carolina
s16684	-92.0126	-8.86704	Baylor College of Medicine
s16715	42.5314	-8.48956	University of North Carolina
s16706	25.9402	-4.02131	University of North Carolina
s16710	31.2839	-2.59604	University of North Carolina
s16768	35.9453	-6.95913	University of North Carolina
s16752	34.0482	-0.633256	University of North Carolina
s16725	53.9206	-15.7299	University of North Carolina
s16691	27.572	-3.33158	University of North Carolina
s16764	41.596	-2.73334	University of North Carolina
s16722	32.8746	-0.559384	University of North Carolina
s16728	45.2925	-12.7031	University of North Carolina
s16695	26.0181	2.16661	University of North Carolina
s16736	46.6621	-8.73485	University of North Carolina
s16682	-122.068	18.593	Baylor College of Medicine
s16673	-93.9445	-4.77096	Baylor College of Medicine
s16721	27.0665	11.684	University of North Carolina
s16680	-92.5787	-12.3864	Baylor College of Medicine
s16692	43.1046	-8.44123	University of North Carolina
s16708	50.7323	-4.48595	University of North Carolina
s16744	31.2403	9.76342	University of North Carolina
s16759	56.0857	-17.8948	University of North Carolina
s16741	26.9969	-4.65005	University of North Carolina
s16707	27.4689	-3.62901	University of North Carolina
s16971	-109.14	4.99517	Baylor College of Medicine
s17012	31.5587	-8.50155	University of North Carolina
s17035	51.9563	-21.0485	University of North Carolina
s17041	43.2484	-4.05442	University of North Carolina
s16977	-115.415	-2.08	Baylor College of Medicine
s17006	48.5352	-4.89995	University of North Carolina
s17033	42.9743	-10.1882	University of North Carolina
s17004	25.954	2.41632	University of North Carolina
s16982	-106.211	-4.08347	Baylor College of Medicine
s17001	32.7759	-8.09217	University of North Carolina
s16985	-88.2618	-9.67381	Baylor College of Medicine
s16999	37.6494	-1.39124	University of North Carolina
s17000	27.5888	-5.95434	University of North Carolina
s17019	48.2287	-13.1751	University of North Carolina
s17011	39.1191	0.193506	University of North Carolina
s17005	38.8734	-5.0148	University of North Carolina
s17029	35.0177	0.748172	University of North Carolina
s16984	-110.135	-2.42309	Baylor College of Medicine
s17025	29.7405	4.70348	University of North Carolina
s16988	-105.588	-4.23653	Baylor College of Medicine
s17047	59.6744	-11.4331	University of North Carolina
s16970	-93.5458	-6.75829	Baylor College of Medicine
s16997	32.9285	-1.60853	University of North Carolina
s17034	39.5047	-8.732	University of North Carolina
s16989	16.927	7.10094	University of North Carolina
s16979	-96.9426	-0.824148	Baylor College of Medicine
s17018	38.7673	-5.51873	University of North Carolina
s17050	65.3224	-17.952	University of North Carolina
s17055	33.7004	-5.93957	University of North Carolina
s17010	28.3434	-2.17399	University of North Carolina
s17020	51.9362	-7.46349	University of North Carolina
s17046	52.1548	-16.2261	University of North Carolina
s16981	-90.4816	-10.1491	Baylor College of Medicine
s16980	-113.069	1.41495	Baylor College of Medicine
s17049	45.3965	-10.5182	University of North Carolina
s16975	-115.885	0.453521	Baylor College of Medicine
s16992	29.4786	13.6588	University of North Carolina
s17051	35.5401	-4.0742	University of North Carolina
s16983	-109.813	-0.201247	Baylor College of Medicine
s17030	27.7638	-6.57954	University of North Carolina
s17028	34.8809	1.33669	University of North Carolina
s16993	13.2031	8.68457	University of North Carolina
s16990	27.0764	6.13928	University of North Carolina
s16996	37.6888	-7.59099	University of North Carolina
s17052	34.6791	-0.844312	University of North Carolina
s16998	29.2259	-0.1567	University of North Carolina
s17027	28.7703	-1.18685	University of North Carolina
s17013	36.877	0.131085	University of North Carolina
s16976	-110.238	1.99044	Baylor College of Medicine
s17048	42.8356	-4.11202	University of North Carolina
s17053	39.6601	-7.01161	University of North Carolina
s17008	36.5333	3.0086	University of North Carolina
s16973	-92.0894	-10.2478	Baylor College of Medicine
s17003	36.4643	-6.44043	University of North Carolina
s17038	22.6085	-3.94822	University of North Carolina
s16994	26.6313	1.18179	University of North Carolina
s17054	53.3019	-11.7108	University of North Carolina
s17032	38.175	-3.41256	University of North Carolina
s17009	32.2402	-1.13263	University of North Carolina
s17014	32.6847	-12.6459	University of North Carolina
s17045	54.5166	-19.6513	University of North Carolina
s17036	37.9712	-8.97693	University of North Carolina
s17026	27.8068	6.71073	University of North Carolina
s17031	34.0745	-6.17988	University of North Carolina
s17015	22.1478	-2.11671	University of North Carolina
s17024	33.2977	5.58981	University of North Carolina
s17042	41.0605	-5.33945	University of North Carolina
s17023	38.2792	-0.682165	University of North Carolina
s17017	40.8959	-15.7762	University of North Carolina
s16986	-135.133	25.3805	Baylor College of Medicine
s16995	24.2507	-1.21907	University of North Carolina
s17022	32.5266	5.64985	University of North Carolina
s17002	37.3242	-6.75085	University of North Carolina
s17016	32.4358	-3.39661	University of North Carolina
s17040	31.159	-1.63071	University of North Carolina
s17037	38.4869	-1.7664	University of North Carolina
s16974	-96.8456	-11.8507	Baylor College of Medicine
s17007	37.0887	-5.60424	University of North Carolina
s16987	-90.0254	-13.2195	Baylor College of Medicine
s17044	47.7698	-15.5665	University of North Carolina
s16991	59.6423	-23.7165	University of North Carolina
s16972	-118.969	11.4072	Baylor College of Medicine
s17043	57.3453	-18.4046	University of North Carolina
s17021	28.799	1.51729	University of North Carolina
s16978	-110.727	-1.55538	Baylor College of Medicine
s17111	24.1129	-3.81341	University of North Carolina
s17091	35.6828	5.04497	University of North Carolina
s17095	42.6658	-8.62764	University of North Carolina
s17076	20.1356	6.57074	University of North Carolina
s17075	28.751	-1.51402	University of North Carolina
s17106	45.0536	-9.3077	University of North Carolina
s17081	38.226	-14.9868	University of North Carolina
s17085	45.7538	-9.58701	University of North Carolina
s17093	30.2911	6.69565	University of North Carolina
s17058	-91.9974	-8.24451	Baylor College of Medicine
s17096	27.6471	-3.32851	University of North Carolina
s17080	43.7723	-10.939	University of North Carolina
s17104	39.1363	2.0063	University of North Carolina
s17064	-127.195	21.4873	Baylor College of Medicine
s17071	26.6173	6.88648	University of North Carolina
s17062	-90.4175	-7.44648	Baylor College of Medicine
s17074	30.7803	-6.0633	University of North Carolina
s17102	29.8951	12.6246	University of North Carolina
s17068	43.466	-17.0899	University of North Carolina
s17101	43.4305	-12.1816	University of North Carolina
s17097	32.8388	3.38981	University of North Carolina
s17086	46.1722	-10.0368	University of North Carolina
s17066	29.4493	1.53705	University of North Carolina
s17100	41.2068	-2.55794	University of North Carolina
s17099	45.253	-4.60186	University of North Carolina
s17082	24.7401	-3.61749	University of North Carolina
s17060	-92.3297	-8.57374	Baylor College of Medicine
s17079	36.1952	-10.3227	University of North Carolina
s17072	39.0046	-6.2447	University of North Carolina
s17088	32.0559	-2.85442	University of North Carolina
s17070	51.8511	-17.8475	University of North Carolina
s17098	38.1333	-10.322	University of North Carolina
s17067	30.6699	4.0356	University of North Carolina
s17090	37.7799	1.63475	University of North Carolina
s17103	38.966	-7.43428	University of North Carolina
s17108	46.6319	-12.6998	University of North Carolina
s17078	41.4917	-7.64004	University of North Carolina
s17105	47.0479	-14.7683	University of North Carolina
s17092	31.051	7.54196	University of North Carolina
s17069	65.4211	-25.1553	University of North Carolina
s17094	41.7393	-1.6775	University of North Carolina
s17073	44.2803	-4.0918	University of North Carolina
s17109	52.6081	-9.92745	University of North Carolina
s17110	50.0581	-12.1455	University of North Carolina
s17084	22.9835	0.859454	University of North Carolina
s17065	-86.7904	-8.85307	Baylor College of Medicine
s17089	35.5652	-5.1614	University of North Carolina
s17107	43.3533	-10.0233	University of North Carolina
s17056	-96.2119	-8.50934	Baylor College of Medicine
s17061	-97.1097	-8.90699	Baylor College of Medicine
s17059	-110.84	-1.71184	Baylor College of Medicine
s17077	38.6385	-5.11486	University of North Carolina
s17057	-109.409	-2.75325	Baylor College of Medicine
s17083	29.865	-3.69379	University of North Carolina
s17063	-86.2265	-12.6493	Baylor College of Medicine
s15697	31.0255	-11.5707	University of North Carolina
s15624	-34.8041	-24.5957	Harvard Medical School
s15741	20.0253	-2.04593	University of North Carolina
s15623	-55.0002	-20.1343	Harvard Medical School
s15629	-24.6499	-24.7499	Harvard Medical School
s15725	33.9057	3.48487	University of North Carolina
s15712	34.0262	-9.90289	University of North Carolina
s15731	29.8982	4.12005	University of North Carolina
s15678	39.6594	-8.21096	University of North Carolina
s15677	37.8505	-8.80181	University of North Carolina
s15604	-68.7621	0.785664	Broad Institute of MIT and Harvard
s15679	24.2854	-9.86399	University of North Carolina
s15664	27.4755	1.32927	University of North Carolina
s15613	-31.3954	-30.5984	Harvard Medical School
s15676	31.8284	-6.40869	University of North Carolina
s15682	29.8129	-4.78488	University of North Carolina
s15642	-37.4994	-20.835	Harvard Medical School
s15724	40.1469	-8.17105	University of North Carolina
s15655	-34.2919	-31.6001	Harvard Medical School
s15609	-31.7563	-27.7234	Harvard Medical School
s15693	23.2812	-0.557423	University of North Carolina
s15680	32.1013	-11.4392	University of North Carolina
s15730	20.8393	1.97745	University of North Carolina
s15611	-33.0422	-29.517	Harvard Medical School
s15652	-20.2728	-36.4152	MD Anderson - Institute for Applied Cancer Science
s15632	-33.3263	-24.9133	Harvard Medical School
s15661	43.1427	-13.6074	University of North Carolina
s15729	17.2106	3.2467	University of North Carolina
s15648	-61.665	-23.6934	Baylor College of Medicine
s15665	22.8278	2.88701	University of North Carolina
s15615	-123.306	19.9136	Baylor College of Medicine
s15736	30.6428	-0.521471	University of North Carolina
s15616	-44.8341	-19.9113	Harvard Medical School
s15626	-35.0423	-31.4064	Harvard Medical School
s15640	-19.7486	-29.9636	Harvard Medical School
s15713	39.931	-13.9616	University of North Carolina
s15603	-63.6177	-15.8776	Broad Institute of MIT and Harvard
s15737	31.9577	-0.865802	University of North Carolina
s15622	-51.6944	-20.725	Harvard Medical School
s15708	34.6726	-7.95886	University of North Carolina
s15705	33.9764	-5.0094	University of North Carolina
s15621	-53.7448	-18.5904	Harvard Medical School
s15732	27.2822	4.757	University of North Carolina
s15639	-99.1089	1.34546	Baylor College of Medicine
s15644	-44.0275	-22.3964	MD Anderson - Institute for Applied Cancer Science
s15637	-30.8494	-33.2742	MD Anderson - Institute for Applied Cancer Science
s15733	31.3756	3.37639	University of North Carolina
s15688	32.1404	-2.74704	University of North Carolina
s15706	34.4375	-5.38844	University of North Carolina
s15643	-88.0724	-16.4391	Baylor College of Medicine
s15650	-48.4144	-27.5486	Harvard Medical School
s15681	24.2351	-3.62843	University of North Carolina
s15704	33.4832	-1.59854	University of North Carolina
s15735	22.2523	7.35143	University of North Carolina
s15635	-101.644	0.182771	Baylor College of Medicine
s15653	-44.758	-11.9018	Harvard Medical School
s15657	-100.316	0.373034	Baylor College of Medicine
s15602	-53.1905	-8.96148	Broad Institute of MIT and Harvard
s15620	-21.6067	-33.9858	Harvard Medical School
s15656	-47.5554	-14.0979	Harvard Medical School
s15673	43.3067	-10.8334	University of North Carolina
s15668	35.9676	-7.8197	University of North Carolina
s15718	27.7879	-1.72579	University of North Carolina
s15610	-33.0552	-20.6461	Harvard Medical School
s15641	-21.8033	-33.9324	Harvard Medical School
s15646	-74.6419	-7.7373	Baylor College of Medicine
s15674	28.4123	5.35113	University of North Carolina
s15690	27.078	-1.34484	University of North Carolina
s15714	15.2396	-2.40345	University of North Carolina
s15719	28.9631	-8.01276	University of North Carolina
s15685	19.3035	2.63619	University of North Carolina
s15649	-69.2553	-4.85209	Baylor College of Medicine
s15625	-35.9497	-21.7889	Harvard Medical School
s15739	27.8109	5.90058	University of North Carolina
s15617	-24.3121	-29.7087	Harvard Medical School
s15614	-88.9897	-11.9046	Baylor College of Medicine
s15703	25.437	-6.60926	University of North Carolina
s15630	-44.1001	-23.3229	Harvard Medical School
s15618	-25.6553	-32.9041	Harvard Medical School
s15695	28.7156	-2.54911	University of North Carolina
s15689	43.015	-11.193	University of North Carolina
s15645	2.94619	-38.795	Harvard Medical School
s15721	28.9891	-7.14642	University of North Carolina
s15619	-51.8979	-22.1743	Harvard Medical School
s15675	34.5906	-5.25333	University of North Carolina
s15669	35.5991	0.438492	University of North Carolina
s15605	-72.4141	-9.33644	Broad Institute of MIT and Harvard
s15663	31.2399	-5.85711	University of North Carolina
s15696	33.6704	-7.22766	University of North Carolina
s15651	-25.0624	-22.8746	MD Anderson - Institute for Applied Cancer Science
s15715	27.7279	-5.34894	University of North Carolina
s15699	33.0269	-8.18107	University of North Carolina
s15720	27.8166	-0.312919	University of North Carolina
s15700	25.5458	-6.23919	University of North Carolina
s15707	32.0141	-7.84329	University of North Carolina
s15631	-44.2069	-26.1553	Harvard Medical School
s15660	36.87	-9.35477	University of North Carolina
s15727	28.8061	0.139696	University of North Carolina
s15686	34.2636	-5.29668	University of North Carolina
s15723	29.4363	-3.45103	University of North Carolina
s15633	-41.3477	-25.3508	Harvard Medical School
s15734	27.1403	2.78359	University of North Carolina
s15628	-38.45	-26.6146	Harvard Medical School
s15684	39.9384	-6.61525	University of North Carolina
s15671	31.794	0.8142	University of North Carolina
s15634	-108.288	1.93219	Baylor College of Medicine
s15701	19.6222	9.89606	University of North Carolina
s15607	-61.4126	-18.4008	Broad Institute of MIT and Harvard
s15709	47.2639	-14.7162	University of North Carolina
s15636	-86.4434	-11.9436	Baylor College of Medicine
s15726	42.7297	-3.19774	University of North Carolina
s15702	13.9491	4.50353	University of North Carolina
s15710	26.5486	-3.87472	University of North Carolina
s15740	32.717	-5.04237	University of North Carolina
s15683	27.6159	-3.98594	University of North Carolina
s15662	29.0742	-2.28833	University of North Carolina
s15627	-102.93	7.91878	Baylor College of Medicine
s15659	31.4656	-2.82209	University of North Carolina
s15608	-22.9847	-33.385	Harvard Medical School
s15711	30.5061	-6.55861	University of North Carolina
s15647	-33.8541	-27.8322	Harvard Medical School
s15717	33.4768	-8.78046	University of North Carolina
s15698	44.483	-10.9863	University of North Carolina
s15694	46.2996	-14.2247	University of North Carolina
s15716	39.2098	-11.3479	University of North Carolina
s15670	48.1857	-15.4205	University of North Carolina
s15691	44.0301	6.69567	University of North Carolina
s15654	-44.6557	-12.0552	Harvard Medical School
s15612	-33.2166	-26.64	Harvard Medical School
s15728	15.8835	0.54589	University of North Carolina
s15658	34.6365	-8.26733	University of North Carolina
s15638	-17.7441	-29.3935	Harvard Medical School
s15722	29.6771	-5.35567	University of North Carolina
s15666	35.7984	-1.07017	University of North Carolina
s15667	25.5816	-10.4159	University of North Carolina
s15738	43.966	-9.52769	University of North Carolina
s15687	35.9793	-6.66254	University of North Carolina
s15692	32.233	-0.89295	University of North Carolina
s15606	-92.061	-2.14344	Broad Institute of MIT and Harvard
s15672	19.3971	1.68073	University of North Carolina
s16230	44.8049	-9.84358	University of North Carolina
s16229	29.0302	-1.50769	University of North Carolina
s16209	-26.545	-32.3191	MD Anderson - Institute for Applied Cancer Science
s16240	16.7302	-2.05331	University of North Carolina
s16296	21.8405	7.02021	University of North Carolina
s16231	27.7537	-2.40175	University of North Carolina
s16217	7.32456	10.0774	University of North Carolina
s16249	38.7594	-11.3705	University of North Carolina
s16166	-69.9764	-12.1391	Broad Institute of MIT and Harvard
s16215	27.0339	1.33416	University of North Carolina
s16238	49.69	-15.3499	University of North Carolina
s16263	40.8806	-7.16648	University of North Carolina
s16295	31.5016	4.11977	University of North Carolina
s16218	14.4107	3.36973	University of North Carolina
s16197	-38.0148	-27.4796	Harvard Medical School
s16308	55.6734	-14.4835	University of North Carolina
s16202	-58.3296	-19.9071	Harvard Medical School
s16183	-52.68	-18.6391	Harvard Medical School
s16174	-17.4953	-29.4428	Harvard Medical School
s16190	-52.8491	-22.1252	Harvard Medical School
s16300	32.2418	6.12286	University of North Carolina
s16267	34.2917	-2.9037	University of North Carolina
s16216	22.2139	4.00871	University of North Carolina
s16235	36.7699	-6.74184	University of North Carolina
s16271	56.7697	3.88663	University of North Carolina
s16224	27.4847	1.78183	University of North Carolina
s16226	36.7185	-7.9254	University of North Carolina
s16207	-24.4713	-26.081	MD Anderson - Institute for Applied Cancer Science
s16204	-25.5477	-32.0705	MD Anderson - Institute for Applied Cancer Science
s16172	-32.9371	-31.7196	Harvard Medical School
s16198	-44.6439	-27.3139	Harvard Medical School
s16282	29.7525	-2.25743	University of North Carolina
s16265	45.6993	-10.9534	University of North Carolina
s16167	-58.8514	-14.9643	Broad Institute of MIT and Harvard
s16219	20.7679	1.24404	University of North Carolina
s16169	-13.4788	-37.6135	Harvard Medical School
s16255	28.1533	-6.23624	University of North Carolina
s16203	-5.29991	-30.3858	Harvard Medical School
s16201	-115.228	15.4052	Baylor College of Medicine
s16189	-43.4454	-27.9735	Harvard Medical School
s16221	18.218	-1.00523	University of North Carolina
s16173	-55.2282	-16.6755	Harvard Medical School
s16176	-33.1767	-26.8411	Harvard Medical School
s16208	-51.025	-15.8461	Harvard Medical School
s16194	-39.1609	-25.8216	Harvard Medical School
s16251	39.617	-5.16204	University of North Carolina
s16184	-35.9808	-23.0366	Harvard Medical School
s16309	31.1818	3.39551	University of North Carolina
s16261	27.1301	1.39289	University of North Carolina
s16191	-89.466	-15.9125	Baylor College of Medicine
s16227	35.4148	-4.93953	University of North Carolina
s16305	39.2357	-3.72995	University of North Carolina
s16213	47.709	-13.8088	University of North Carolina
s16274	31.6861	5.79312	University of North Carolina
s16188	-91.9361	-17.4976	Baylor College of Medicine
s16304	30.6446	0.344671	University of North Carolina
s16171	-89.5145	-13.1782	Baylor College of Medicine
s16266	37.6783	-9.75871	University of North Carolina
s16239	22.1353	8.9886	University of North Carolina
s16307	22.2825	7.0054	University of North Carolina
s16187	-97.7181	-0.301768	Baylor College of Medicine
s16244	41.0568	-1.90729	University of North Carolina
s16195	-34.6008	-24.9194	Harvard Medical School
s16252	19.1313	-0.636776	University of North Carolina
s16245	41.007	-4.39109	University of North Carolina
s16289	29.4573	-4.37739	University of North Carolina
s16294	29.2956	1.16392	University of North Carolina
s16299	29.9182	1.25542	University of North Carolina
s16164	-57.6576	-16.1006	Broad Institute of MIT and Harvard
s16193	-29.9807	-27.8484	Harvard Medical School
s16236	44.2637	-1.69825	University of North Carolina
s16286	25.1844	-3.19896	University of North Carolina
s16242	24.7922	1.11471	University of North Carolina
s16293	24.0724	1.33486	University of North Carolina
s16301	25.3997	-2.76289	University of North Carolina
s16288	27.7139	-4.48037	University of North Carolina
s16297	21.4419	5.3047	University of North Carolina
s16186	-39.821	-26.0817	Harvard Medical School
s16170	-28.2813	-31.6118	Harvard Medical School
s16234	24.2096	-0.66149	University of North Carolina
s16200	-32.422	-20.0239	Harvard Medical School
s16180	-27.9345	-26.9837	Harvard Medical School
s16205	-39.508	-28.5391	Harvard Medical School
s16257	37.6789	-5.70386	University of North Carolina
s16182	-41.3165	-27.5578	Harvard Medical School
s16178	-26.9546	-19.736	Harvard Medical School
s16284	36.8285	-9.88	University of North Carolina
s16269	39.6587	-8.73828	University of North Carolina
s16232	35.9025	-10.4873	University of North Carolina
s16283	36.1913	-8.64192	University of North Carolina
s16262	31.4873	-2.18758	University of North Carolina
s16258	19.351	5.58092	University of North Carolina
s16185	-34.8471	-26.1732	Harvard Medical School
s16225	43.472	-10.0051	University of North Carolina
s16220	26.8507	4.27286	University of North Carolina
s16192	-120.634	16.1891	Baylor College of Medicine
s16248	43.9983	-11.317	University of North Carolina
s16259	19.6488	4.23397	University of North Carolina
s16302	40.9533	-7.65074	University of North Carolina
s16277	19.9296	0.305645	University of North Carolina
s16247	13.3603	-0.207109	University of North Carolina
s16241	34.3389	-10.6805	University of North Carolina
s16276	28.8172	1.58745	University of North Carolina
s16177	-110.478	3.00279	Baylor College of Medicine
s16237	20.1985	-8.36753	University of North Carolina
s16310	35.9025	-14.4434	University of North Carolina
s16281	31.8632	-3.61643	University of North Carolina
s16280	24.2405	-5.12617	University of North Carolina
s16179	-87.698	-13.5569	Baylor College of Medicine
s16292	30.1895	-0.743407	University of North Carolina
s16291	18.18	10.0461	University of North Carolina
s16199	-32.3874	-24.8835	Harvard Medical School
s16228	38.4482	-7.46196	University of North Carolina
s16206	-32.3169	-15.3006	MD Anderson - Institute for Applied Cancer Science
s16260	32.415	-2.47422	University of North Carolina
s16290	30.0616	-3.8079	University of North Carolina
s16264	46.8317	-13.8382	University of North Carolina
s16270	26.7061	-5.1286	University of North Carolina
s16196	-92.4863	-4.10603	Baylor College of Medicine
s16287	34.6913	-5.80775	University of North Carolina
s16285	32.9718	-4.39239	University of North Carolina
s16233	23.1181	0.382145	University of North Carolina
s16250	25.823	4.4449	University of North Carolina
s16222	33.259	-9.3297	University of North Carolina
s16279	32.64	-9.00552	University of North Carolina
s16175	-37.299	-29.5581	Harvard Medical School
s16165	-63.1256	-11.0267	Broad Institute of MIT and Harvard
s16268	34.1242	-8.93111	University of North Carolina
s16210	19.1035	4.7502	University of North Carolina
s16212	37.1404	-13.2783	University of North Carolina
s16256	39.483	-4.87407	University of North Carolina
s16275	29.7827	-7.49204	University of North Carolina
s16253	40.2227	-8.30483	University of North Carolina
s16243	24.5232	-6.08761	University of North Carolina
s16163	-78.0234	-7.04061	Broad Institute of MIT and Harvard
s16246	32.1404	-4.31995	University of North Carolina
s16273	28.7351	5.38699	University of North Carolina
s16254	31.4287	-3.8543	University of North Carolina
s16298	24.6253	5.76214	University of North Carolina
s16223	43.9958	-12.4458	University of North Carolina
s16306	40.7568	-7.19908	University of North Carolina
s16168	-20.0236	-36.095	Harvard Medical School
s16303	31.586	-0.643553	University of North Carolina
s16211	18.6881	6.82672	University of North Carolina
s16272	24.8194	5.14766	University of North Carolina
s16181	-26.1069	-28.7334	Harvard Medical School
s16278	34.092	-2.62578	University of North Carolina
s16214	29.0942	-1.00066	University of North Carolina
s15527	-31.052	-26.0799	MD Anderson - Institute for Applied Cancer Science
s15483	-68.0696	-7.68892	Broad Institute of MIT and Harvard
s15518	-17.982	-0.61062	Harvard Medical School
s15526	-25.0184	-30.8046	MD Anderson - Institute for Applied Cancer Science
s15552	25.9916	-2.14297	University of North Carolina
s15584	30.9264	-10.1411	University of North Carolina
s15571	52.3372	-13.8252	University of North Carolina
s15537	23.3453	5.1383	University of North Carolina
s15557	32.3519	-0.344514	University of North Carolina
s15540	27.9717	1.56497	University of North Carolina
s15509	-26.11	-31.4126	Harvard Medical School
s15484	-61.5315	-6.69677	Broad Institute of MIT and Harvard
s15582	33.6494	-5.99707	University of North Carolina
s15590	29.7407	2.94702	University of North Carolina
s15534	-76.4727	-1.52558	Baylor College of Medicine
s15504	-78.8369	-6.41386	Baylor College of Medicine
s15500	-110.091	4.38337	Baylor College of Medicine
s15493	-15.3121	-35.3826	Harvard Medical School
s15485	-57.649	-10.2547	Broad Institute of MIT and Harvard
s15585	46.6224	-16.8526	University of North Carolina
s15599	16.7464	10.8547	University of North Carolina
s15562	39.1565	-4.52774	University of North Carolina
s15531	-17.5132	-35.1675	Harvard Medical School
s15551	34.8173	-1.61883	University of North Carolina
s15516	-40.7146	-25.2182	Harvard Medical School
s15508	-45.5438	-27.5529	MD Anderson - Institute for Applied Cancer Science
s15587	41.8178	-11.2448	University of North Carolina
s15596	41.0837	-7.99711	University of North Carolina
s15544	40.9337	-8.7232	University of North Carolina
s15572	33.5639	-12.0889	University of North Carolina
s15486	-56.6182	-20.2937	Broad Institute of MIT and Harvard
s15517	-42.4912	-25.2711	MD Anderson - Institute for Applied Cancer Science
s15564	57.1812	-14.0843	University of North Carolina
s15487	-18.3941	-33.7893	Harvard Medical School
s15546	35.8317	-5.34284	University of North Carolina
s15497	-35.7116	-27.795	Harvard Medical School
s15574	26.8839	11.6072	University of North Carolina
s15496	-26.7306	-34.4604	Harvard Medical School
s15600	25.0029	-1.39027	University of North Carolina
s15594	30.0872	4.35762	University of North Carolina
s15567	32.1332	-2.99736	University of North Carolina
s15507	-96.2159	1.45001	Baylor College of Medicine
s15528	-27.8363	-27.9686	MD Anderson - Institute for Applied Cancer Science
s15513	-31.291	-20.5755	Harvard Medical School
s15561	37.7347	-7.37872	University of North Carolina
s15568	38.4036	-3.88253	University of North Carolina
s15525	-100.252	7.65209	Baylor College of Medicine
s15511	-106.916	-9.98546	Baylor College of Medicine
s15543	38.6284	-8.21794	University of North Carolina
s15510	-27.9322	-22.0182	Harvard Medical School
s15601	37.038	-14.3259	University of North Carolina
s15566	49.1407	-10.7274	University of North Carolina
s15502	-43.0038	-21.9838	Harvard Medical School
s15553	42.7556	-7.51288	University of North Carolina
s15560	23.0018	-6.58983	University of North Carolina
s15598	34.1467	-0.39812	University of North Carolina
s15499	-95.6179	0.149738	Baylor College of Medicine
s15498	-21.1815	-30.436	Harvard Medical School
s15501	-29.2821	-32.0972	Harvard Medical School
s15588	70.2722	-4.55505	University of North Carolina
s15575	19.5363	12.8926	University of North Carolina
s15536	26.2114	-2.55518	University of North Carolina
s15592	19.0721	8.98257	University of North Carolina
s15519	-31.7505	-14.8614	Harvard Medical School
s15556	36.4774	-0.577961	University of North Carolina
s15491	-34.6813	-29.2899	Harvard Medical School
s15558	49.808	-14.2802	University of North Carolina
s15541	21.5771	3.53372	University of North Carolina
s15586	27.2065	0.564171	University of North Carolina
s15514	-78.9961	-12.5518	Baylor College of Medicine
s15482	-78.0547	-8.13468	Broad Institute of MIT and Harvard
s15523	-39.5474	-25.1205	MD Anderson - Institute for Applied Cancer Science
s15535	30.2326	-4.88885	University of North Carolina
s15506	-28.2441	-27.4521	MD Anderson - Institute for Applied Cancer Science
s15550	18.3623	0.574858	University of North Carolina
s15489	-44.5973	-18.5408	Harvard Medical School
s15492	-109.121	-1.06265	Baylor College of Medicine
s15579	27.3335	0.598168	University of North Carolina
s15548	35.2011	-10.4411	University of North Carolina
s15569	36.2503	-8.92092	University of North Carolina
s15559	39.6492	-4.82614	University of North Carolina
s15521	-9.03178	-37.4112	Harvard Medical School
s15494	-45.7177	-23.0262	Harvard Medical School
s15580	30.9972	0.329837	University of North Carolina
s15563	36.6378	-7.31029	University of North Carolina
s15539	17.5685	-1.21428	University of North Carolina
s15593	21.7184	2.4931	University of North Carolina
s15595	22.449	4.20253	University of North Carolina
s15505	-52.1145	-14.8526	Harvard Medical School
s15490	-34.7244	-32.0427	Harvard Medical School
s15581	28.3316	-5.61918	University of North Carolina
s15554	25.6382	-2.49289	University of North Carolina
s15529	-19.8476	-33.6196	Harvard Medical School
s15520	-45.0577	-23.9803	MD Anderson - Institute for Applied Cancer Science
s15515	-46.1185	-26.1129	Harvard Medical School
s15545	21.0395	8.7264	University of North Carolina
s15591	34.2242	-6.66984	University of North Carolina
s15524	-99.135	0.361166	Baylor College of Medicine
s15549	28.8818	-8.41054	University of North Carolina
s15538	37.5974	3.60034	University of North Carolina
s15589	36.1014	-10.1181	University of North Carolina
s15512	-36.822	-29.3364	Harvard Medical School
s15578	24.5118	10.4348	University of North Carolina
s15533	-47.3436	-18.2413	Harvard Medical School
s15522	-38.1309	-21.569	MD Anderson - Institute for Applied Cancer Science
s15488	-19.6033	-34.2618	Harvard Medical School
s15577	34.299	0.105468	University of North Carolina
s15532	-37.6324	-28.414	Harvard Medical School
s15570	52.8229	-15.4092	University of North Carolina
s15555	48.1847	-10.1005	University of North Carolina
s15495	-29.0719	-34.5587	Harvard Medical School
s15576	33.6803	0.654018	University of North Carolina
s15530	-59.0797	-17.3577	Harvard Medical School
s15565	32.0457	-3.03137	University of North Carolina
s15597	40.4853	-1.93276	University of North Carolina
s15503	-118.726	17.2021	Baylor College of Medicine
s15573	34.0528	-3.45416	University of North Carolina
s15542	27.5665	6.49467	University of North Carolina
s15547	34.594	-7.45871	University of North Carolina
s16069	22.8651	-3.48578	University of North Carolina
s16045	-14.3972	-24.8199	Harvard Medical School
s16041	-32.1237	-28.1672	Harvard Medical School
s16040	-51.5122	-21.7177	MD Anderson - Institute for Applied Cancer Science
s16018	-74.9814	-6.72588	Broad Institute of MIT and Harvard
s16129	31.7843	-4.63945	University of North Carolina
s16098	30.3924	-1.91065	University of North Carolina
s16088	40.4407	-10.7812	University of North Carolina
s16160	31.4569	-5.97824	University of North Carolina
s16151	37.7895	-4.2663	University of North Carolina
s16034	-44.3052	-15.8517	Harvard Medical School
s16120	36.7756	-12.4303	University of North Carolina
s16146	38.5613	-7.28889	University of North Carolina
s16052	-50.1283	-22.2736	MD Anderson - Institute for Applied Cancer Science
s16043	-91.0332	2.33759	Baylor College of Medicine
s16075	14.6595	-1.53281	University of North Carolina
s16078	30.1605	-1.60869	University of North Carolina
s16044	-57.3022	-18.7202	Harvard Medical School
s16104	49.1313	-13.8855	University of North Carolina
s16092	21.4221	2.40958	University of North Carolina
s16097	25.2019	-2.38277	University of North Carolina
s16066	26.9835	-3.55658	University of North Carolina
s16123	38.1616	-13.9503	University of North Carolina
s16148	25.3283	-0.715005	University of North Carolina
s16130	33.1118	-7.28256	University of North Carolina
s16061	-115.443	17.0819	Baylor College of Medicine
s16136	33.0541	-7.63576	University of North Carolina
s16046	-36.0963	-25.1906	Harvard Medical School
s16074	29.7573	-3.69563	University of North Carolina
s16035	-33.6531	-24.4026	Harvard Medical School
s16089	27.2331	1.25753	University of North Carolina
s16141	43.4245	-12.3593	University of North Carolina
s16022	-59.0172	-17.4745	Broad Institute of MIT and Harvard
s16037	-40.7688	-22.1174	Harvard Medical School
s16025	-102.575	13.3035	Baylor College of Medicine
s16073	24.5376	8.33207	University of North Carolina
s16085	29.1132	-1.8092	University of North Carolina
s16156	24.4409	9.28141	University of North Carolina
[truncated: 15,626 more rows]

## Sheet: Fig 1d
	PC1	PC2	Batch
s17489	-24.3998	-0.482256	Canada's Michael Smith Genome Sciences Centre
s17512	-3.61115	-1.31461	Canada's Michael Smith Genome Sciences Centre
s17498	-7.80019	4.78679	Canada's Michael Smith Genome Sciences Centre
s17528	18.8269	17.72	Canada's Michael Smith Genome Sciences Centre
s17535	0.610976	5.32709	Canada's Michael Smith Genome Sciences Centre
s17482	-1.80693	2.81163	Broad Institute of MIT and Harvard
s17490	-12.1636	4.28541	Baylor College of Medicine
s17541	3.29442	-7.74981	Canada's Michael Smith Genome Sciences Centre
s17499	7.08876	11.4291	Canada's Michael Smith Genome Sciences Centre
s17500	14.0989	2.2751	Canada's Michael Smith Genome Sciences Centre
s17545	-8.35633	0.836171	Canada's Michael Smith Genome Sciences Centre
s17516	-14.9191	0.999911	Canada's Michael Smith Genome Sciences Centre
s17480	-11.7386	-1.85001	Broad Institute of MIT and Harvard
s17533	-12.7192	-11.0952	Canada's Michael Smith Genome Sciences Centre
s17483	0.531989	-3.7508	Broad Institute of MIT and Harvard
s17484	-5.8797	-6.23202	Canada's Michael Smith Genome Sciences Centre
s17525	-20.3307	0.671499	Canada's Michael Smith Genome Sciences Centre
s17513	1.73	2.16505	Canada's Michael Smith Genome Sciences Centre
s17495	-14.0783	8.91322	Canada's Michael Smith Genome Sciences Centre
s17537	2.58757	-11.6309	Canada's Michael Smith Genome Sciences Centre
s17493	3.61332	-4.47652	Baylor College of Medicine
s17511	0.667848	-3.34568	Canada's Michael Smith Genome Sciences Centre
s17520	-11.65	6.8882	Canada's Michael Smith Genome Sciences Centre
s17486	1.4746	3.213	Canada's Michael Smith Genome Sciences Centre
s17494	1.76444	3.85479	Canada's Michael Smith Genome Sciences Centre
s17540	2.993	-4.38498	Canada's Michael Smith Genome Sciences Centre
s17530	-6.18538	-1.55156	Baylor College of Medicine
s17543	1.11181	-8.96551	Canada's Michael Smith Genome Sciences Centre
s17531	0.665133	1.17689	Canada's Michael Smith Genome Sciences Centre
s17523	-17.2326	4.80955	Canada's Michael Smith Genome Sciences Centre
s17522	-17.7116	3.14766	Canada's Michael Smith Genome Sciences Centre
s17526	-7.88091	-8.48365	Canada's Michael Smith Genome Sciences Centre
s17505	-7.72418	-11.5735	Canada's Michael Smith Genome Sciences Centre
s17502	5.58466	6.79856	Canada's Michael Smith Genome Sciences Centre
s17496	2.91351	8.42425	Canada's Michael Smith Genome Sciences Centre
s17501	5.28722	3.63333	Canada's Michael Smith Genome Sciences Centre
s17497	-10.6768	6.27299	Canada's Michael Smith Genome Sciences Centre
s17527	-7.94134	-6.49919	Canada's Michael Smith Genome Sciences Centre
s17492	-7.4449	-6.14283	Canada's Michael Smith Genome Sciences Centre
s17546	5.72786	-16.631	Canada's Michael Smith Genome Sciences Centre
s17524	16.8076	-8.34296	Canada's Michael Smith Genome Sciences Centre
s17491	5.5003	-4.26213	Canada's Michael Smith Genome Sciences Centre
s17487	5.72279	8.53693	Canada's Michael Smith Genome Sciences Centre
s17517	11.8497	15.2698	Canada's Michael Smith Genome Sciences Centre
s17506	-1.24459	-5.18284	Canada's Michael Smith Genome Sciences Centre
s17536	-7.30367	8.68084	Canada's Michael Smith Genome Sciences Centre
s17518	8.72422	-8.4562	Canada's Michael Smith Genome Sciences Centre
s17519	0.0195022	4.99957	Canada's Michael Smith Genome Sciences Centre
s17529	-10.8447	-1.39337	Canada's Michael Smith Genome Sciences Centre
s17507	-17.8535	3.63264	Canada's Michael Smith Genome Sciences Centre
s17532	5.02911	-5.1193	Baylor College of Medicine
s17508	14.8143	-7.44369	Baylor College of Medicine
s17481	-12.8917	0.315308	Broad Institute of MIT and Harvard
s17514	17.8445	13.4053	Canada's Michael Smith Genome Sciences Centre
s17478	-29.4193	1.37879	Washington University School of Medicine
s17485	10.4077	-1.87155	Canada's Michael Smith Genome Sciences Centre
s17479	-43.4037	-15.9155	Broad Institute of MIT and Harvard
s17544	9.81981	1.16125	Baylor College of Medicine
s17503	-6.11649	-20.7673	Canada's Michael Smith Genome Sciences Centre
s17542	-13.7491	-1.83754	Canada's Michael Smith Genome Sciences Centre
s17538	2.62649	11.4875	Baylor College of Medicine
s17534	-17.4404	-9.03342	Canada's Michael Smith Genome Sciences Centre
s17515	-6.22063	2.39969	Canada's Michael Smith Genome Sciences Centre
s17539	6.38226	-5.96014	Canada's Michael Smith Genome Sciences Centre
s17509	-4.49483	-6.75143	Canada's Michael Smith Genome Sciences Centre
s17510	16.8953	-0.566511	Baylor College of Medicine
s17521	-2.98065	-4.26433	Canada's Michael Smith Genome Sciences Centre
s17488	1.449	-6.30069	Canada's Michael Smith Genome Sciences Centre
s17504	10.2444	-9.93798	Canada's Michael Smith Genome Sciences Centre
s17719	-7.11637	4.57634	Canada's Michael Smith Genome Sciences Centre
s17718	-2.41556	-6.55618	Canada's Michael Smith Genome Sciences Centre
s17708	-0.992607	-4.30976	Broad Institute of MIT and Harvard
s17717	-0.673014	7.56617	Canada's Michael Smith Genome Sciences Centre
s17716	-8.45067	5.21733	Baylor College of Medicine
s17735	2.74966	-15.1151	Canada's Michael Smith Genome Sciences Centre
s17712	-6.87722	1.15962	Canada's Michael Smith Genome Sciences Centre
s17707	-3.17389	-8.28935	Broad Institute of MIT and Harvard
s17714	-19.6387	-13.3658	Canada's Michael Smith Genome Sciences Centre
s17721	15.9327	-7.47986	Baylor College of Medicine
s17727	-14.7491	-4.46355	Canada's Michael Smith Genome Sciences Centre
s17709	19.6076	-1.51512	Baylor College of Medicine
s17706	-51.0064	-3.6937	Broad Institute of MIT and Harvard
s17731	2.32271	0.0954058	Canada's Michael Smith Genome Sciences Centre
s17713	16.9321	4.505	Canada's Michael Smith Genome Sciences Centre
s17726	5.66149	-7.67866	Baylor College of Medicine
s17725	-0.991812	-10.9018	Canada's Michael Smith Genome Sciences Centre
s17730	-11.3533	-3.11495	Canada's Michael Smith Genome Sciences Centre
s17728	-13.7247	-1.84531	Canada's Michael Smith Genome Sciences Centre
s17710	-73.5885	-3.45431	Broad Institute of MIT and Harvard
s17720	27.4013	18.97	Canada's Michael Smith Genome Sciences Centre
s17715	-38.1766	-2.342	Washington University School of Medicine
s17724	1.19663	3.18809	Canada's Michael Smith Genome Sciences Centre
s17722	-8.05318	8.44428	Canada's Michael Smith Genome Sciences Centre
s17734	-2.12758	-3.9521	Canada's Michael Smith Genome Sciences Centre
s17732	-1.42171	8.08463	Baylor College of Medicine
s17711	-74.4246	-11.0696	Broad Institute of MIT and Harvard
s17723	-13.7299	5.43397	Canada's Michael Smith Genome Sciences Centre
s17733	6.69291	2.85562	Canada's Michael Smith Genome Sciences Centre
s17729	-0.490633	-2.15411	Canada's Michael Smith Genome Sciences Centre
s17116	-13.8525	0.794592	Broad Institute of MIT and Harvard
s17126	-8.8046	2.65513	Canada's Michael Smith Genome Sciences Centre
s17132	-0.78044	5.56353	Canada's Michael Smith Genome Sciences Centre
s17123	21.4155	18.0424	Canada's Michael Smith Genome Sciences Centre
s17137	-7.34287	12.6557	Baylor College of Medicine
s17125	40.0772	16.2277	Baylor College of Medicine
s17127	-22.3803	4.13381	Canada's Michael Smith Genome Sciences Centre
s17133	-7.36016	-7.58903	Canada's Michael Smith Genome Sciences Centre
s17119	4.3061	-14.1112	Canada's Michael Smith Genome Sciences Centre
s17138	-0.638338	-2.16064	Canada's Michael Smith Genome Sciences Centre
s17141	6.02854	-0.100597	Canada's Michael Smith Genome Sciences Centre
s17144	-21.2843	12.4743	Baylor College of Medicine
s17122	-1.89136	1.03663	Baylor College of Medicine
s17129	-1.78321	-9.0179	Canada's Michael Smith Genome Sciences Centre
s17140	-8.14692	-4.58575	Canada's Michael Smith Genome Sciences Centre
s17145	1.27226	-1.39778	Canada's Michael Smith Genome Sciences Centre
s17139	12.4438	0.931549	Baylor College of Medicine
s17142	1.36304	-4.76258	Canada's Michael Smith Genome Sciences Centre
s17115	-1.47478	2.06093	Broad Institute of MIT and Harvard
s17131	9.76138	4.905	Canada's Michael Smith Genome Sciences Centre
s17135	7.40165	-3.39657	Canada's Michael Smith Genome Sciences Centre
s17134	-6.31649	-7.18687	Canada's Michael Smith Genome Sciences Centre
s17120	-35.8173	13.7221	Canada's Michael Smith Genome Sciences Centre
s17121	-4.50796	20.5468	Canada's Michael Smith Genome Sciences Centre
s17130	-9.76066	-13.3419	Canada's Michael Smith Genome Sciences Centre
s17113	-40.0127	-14.0652	Broad Institute of MIT and Harvard
s17112	-11.7849	1.47057	Washington University School of Medicine
s17118	-26.2196	3.8667	Canada's Michael Smith Genome Sciences Centre
s17146	9.96392	-18.3245	Canada's Michael Smith Genome Sciences Centre
s17114	-0.119008	-1.05919	Broad Institute of MIT and Harvard
s17124	-28.9916	4.69473	Washington University School of Medicine
s17128	-4.45889	-2.14509	Canada's Michael Smith Genome Sciences Centre
s17136	-5.06963	-4.95164	Canada's Michael Smith Genome Sciences Centre
s17143	9.79927	-0.834325	Baylor College of Medicine
s17117	-4.76666	16.6952	Canada's Michael Smith Genome Sciences Centre
s17862	-18.655	7.8195	Broad Institute of MIT and Harvard
s17871	23.7459	5.01297	Canada's Michael Smith Genome Sciences Centre
s17865	-9.40113	13.2558	Canada's Michael Smith Genome Sciences Centre
s17880	-10.5502	2.59426	Canada's Michael Smith Genome Sciences Centre
s17886	-6.41528	2.75183	Canada's Michael Smith Genome Sciences Centre
s17869	-8.61491	12.6308	Canada's Michael Smith Genome Sciences Centre
s17878	-8.30937	11.1167	Baylor College of Medicine
s17885	-66.479	18.9159	Baylor College of Medicine
s17876	-2.69271	4.38536	Canada's Michael Smith Genome Sciences Centre
s17874	7.85058	3.68728	Canada's Michael Smith Genome Sciences Centre
s17884	8.92173	-1.68875	Canada's Michael Smith Genome Sciences Centre
s17867	-9.0932	0.239941	Canada's Michael Smith Genome Sciences Centre
s17861	-20.7517	-4.54175	Washington University School of Medicine
s17883	3.60214	-9.39091	Baylor College of Medicine
s17888	-6.86767	-2.91428	Canada's Michael Smith Genome Sciences Centre
s17864	7.58092	-1.17286	Canada's Michael Smith Genome Sciences Centre
s17887	-0.184707	-1.4593	Canada's Michael Smith Genome Sciences Centre
s17873	-67.7986	-5.65874	Broad Institute of MIT and Harvard
s17882	3.82012	-22.0607	Baylor College of Medicine
s17879	-7.18763	-3.92787	Canada's Michael Smith Genome Sciences Centre
s17872	2.14356	-13.1067	Canada's Michael Smith Genome Sciences Centre
s17870	-3.09773	-8.56494	Canada's Michael Smith Genome Sciences Centre
s17866	-0.491688	-3.8176	Canada's Michael Smith Genome Sciences Centre
s17863	-24.8177	4.62517	Broad Institute of MIT and Harvard
s17877	-3.60801	11.0907	Canada's Michael Smith Genome Sciences Centre
s17868	-61.0769	39.2657	Washington University School of Medicine
s17881	-0.954691	7.77727	Canada's Michael Smith Genome Sciences Centre
s17875	2.58214	-3.31641	Canada's Michael Smith Genome Sciences Centre
s17283	-14.4164	-8.24236	Canada's Michael Smith Genome Sciences Centre
s17312	-12.6966	-8.43269	Canada's Michael Smith Genome Sciences Centre
s17289	-61.6287	-12.8255	Broad Institute of MIT and Harvard
s17295	1.20837	-15.0771	Canada's Michael Smith Genome Sciences Centre
s17286	-18.1881	20.5705	Canada's Michael Smith Genome Sciences Centre
s17318	14.2609	-9.68326	Canada's Michael Smith Genome Sciences Centre
s17322	2.55288	-1.36716	Canada's Michael Smith Genome Sciences Centre
s17290	-0.753449	9.99117	Canada's Michael Smith Genome Sciences Centre
s17314	-11.7916	-5.30954	Canada's Michael Smith Genome Sciences Centre
s17305	-0.824548	-0.427775	Canada's Michael Smith Genome Sciences Centre
s17313	-17.413	0.361523	Canada's Michael Smith Genome Sciences Centre
s17299	4.77001	0.731321	Canada's Michael Smith Genome Sciences Centre
s17301	14.5069	-12.0762	Canada's Michael Smith Genome Sciences Centre
s17293	-3.59422	0.588665	Canada's Michael Smith Genome Sciences Centre
s17282	-3.49497	-0.999245	Canada's Michael Smith Genome Sciences Centre
s17288	-17.2972	10.6506	Canada's Michael Smith Genome Sciences Centre
s17280	-19.42	-0.962531	Broad Institute of MIT and Harvard
s17308	-0.722084	-1.82381	Canada's Michael Smith Genome Sciences Centre
s17296	-6.4443	-9.70205	Canada's Michael Smith Genome Sciences Centre
s17287	-27.5995	-1.75153	Canada's Michael Smith Genome Sciences Centre
s17319	-3.93804	3.68701	Canada's Michael Smith Genome Sciences Centre
s17309	-7.88896	-5.84583	Canada's Michael Smith Genome Sciences Centre
s17284	-17.4912	-17.3774	Canada's Michael Smith Genome Sciences Centre
s17291	-3.94608	7.39928	Baylor College of Medicine
s17298	-14.2114	8.39607	Canada's Michael Smith Genome Sciences Centre
s17292	-25.6496	6.23972	Canada's Michael Smith Genome Sciences Centre
s17281	-1.35834	-10.9136	Canada's Michael Smith Genome Sciences Centre
s17306	-3.03864	-13.9009	Canada's Michael Smith Genome Sciences Centre
s17316	-21.6268	9.24154	Baylor College of Medicine
s17307	5.85596	-4.21626	Canada's Michael Smith Genome Sciences Centre
s17311	30.5702	-12.9905	Baylor College of Medicine
s17321	-5.48598	0.157281	Canada's Michael Smith Genome Sciences Centre
s17303	-8.30238	6.40446	Canada's Michael Smith Genome Sciences Centre
s17297	-5.72989	-0.438094	Canada's Michael Smith Genome Sciences Centre
s17317	-9.56928	-6.88405	Canada's Michael Smith Genome Sciences Centre
s17300	-6.55944	18.8267	Baylor College of Medicine
s17285	-22.1821	5.45738	Canada's Michael Smith Genome Sciences Centre
s17310	-22.1428	5.55747	Canada's Michael Smith Genome Sciences Centre
s17320	-3.68102	-8.41451	Canada's Michael Smith Genome Sciences Centre
s17315	-21.165	-8.07074	Canada's Michael Smith Genome Sciences Centre
s17304	-2.21871	-6.94295	Canada's Michael Smith Genome Sciences Centre
s17302	25.0771	-4.61675	Baylor College of Medicine
s17294	14.3932	-6.41772	Baylor College of Medicine
s17741	1.37109	4.6391	Canada's Michael Smith Genome Sciences Centre
s17749	8.46663	-10.1986	Canada's Michael Smith Genome Sciences Centre
s17755	1.29781	-6.98862	Canada's Michael Smith Genome Sciences Centre
s17744	10.2517	6.55289	Canada's Michael Smith Genome Sciences Centre
s17758	11.4933	-3.21384	Canada's Michael Smith Genome Sciences Centre
s17745	-32.5223	-7.31412	Washington University School of Medicine
s17753	-40.7802	16.8705	Baylor College of Medicine
s17740	-32.6603	1.1753	Washington University School of Medicine
s17748	-88.1413	-3.88655	Broad Institute of MIT and Harvard
s17742	-23.6292	11.5414	Canada's Michael Smith Genome Sciences Centre
s17739	-0.388464	-9.68991	Canada's Michael Smith Genome Sciences Centre
s17759	-11.2565	-12.8423	Canada's Michael Smith Genome Sciences Centre
s17736	0.49364	-15.9799	Canada's Michael Smith Genome Sciences Centre
s17743	-17.0579	-6.8158	Canada's Michael Smith Genome Sciences Centre
s17738	10.6166	9.63936	Canada's Michael Smith Genome Sciences Centre
s17737	3.23203	11.48	Canada's Michael Smith Genome Sciences Centre
s17754	2.70455	10.302	Canada's Michael Smith Genome Sciences Centre
s17752	3.4412	-3.11614	Canada's Michael Smith Genome Sciences Centre
s17756	9.35369	-3.42523	Canada's Michael Smith Genome Sciences Centre
s17751	-15.6858	4.55519	Baylor College of Medicine
s17757	15.5957	-8.19524	Canada's Michael Smith Genome Sciences Centre
s17747	-10.5579	-8.95148	Canada's Michael Smith Genome Sciences Centre
s17750	-8.1831	-5.62628	Canada's Michael Smith Genome Sciences Centre
s17746	-9.76994	-4.59425	Canada's Michael Smith Genome Sciences Centre
s17154	-1.94676	-8.40796	Canada's Michael Smith Genome Sciences Centre
s17157	-12.5455	-2.54692	Canada's Michael Smith Genome Sciences Centre
s17149	-72.3864	-11.7585	Broad Institute of MIT and Harvard
s17160	-19.5133	-1.93581	Canada's Michael Smith Genome Sciences Centre
s17163	-5.33937	7.32688	Baylor College of Medicine
s17148	7.02988	-2.80151	Canada's Michael Smith Genome Sciences Centre
s17161	-1.9586	2.46837	Canada's Michael Smith Genome Sciences Centre
s17158	-6.31805	2.38049	Canada's Michael Smith Genome Sciences Centre
s17155	-1.72532	6.53406	Canada's Michael Smith Genome Sciences Centre
s17156	19.3374	-6.72249	Canada's Michael Smith Genome Sciences Centre
s17162	-7.93854	-5.60638	Canada's Michael Smith Genome Sciences Centre
s17153	15.3038	-20.3319	Canada's Michael Smith Genome Sciences Centre
s17147	-31.0412	2.18361	Washington University School of Medicine
s17152	-1.54133	-12.4931	Canada's Michael Smith Genome Sciences Centre
s17151	1.48304	5.18538	Canada's Michael Smith Genome Sciences Centre
s17159	-46.2922	14.0081	Baylor College of Medicine
s17150	-15.6933	10.9427	Canada's Michael Smith Genome Sciences Centre
s17910	-14.0624	16.2728	Baylor College of Medicine
s17920	26.8768	-7.34912	Baylor College of Medicine
s17940	-2.86381	0.783395	Canada's Michael Smith Genome Sciences Centre
s17976	3.26872	-2.92546	Canada's Michael Smith Genome Sciences Centre
s17955	-12.2561	-0.431494	Canada's Michael Smith Genome Sciences Centre
s17917	2.00715	5.5337	Canada's Michael Smith Genome Sciences Centre
s17972	-5.06759	-5.1805	Canada's Michael Smith Genome Sciences Centre
s17895	-3.63718	-15.6114	Canada's Michael Smith Genome Sciences Centre
s17924	3.43522	-0.786008	Canada's Michael Smith Genome Sciences Centre
s17939	8.95247	-11.4638	Canada's Michael Smith Genome Sciences Centre
s17960	7.3435	-12.3952	Canada's Michael Smith Genome Sciences Centre
s17923	-21.448	-4.31036	Canada's Michael Smith Genome Sciences Centre
s17906	-6.55943	-14.2427	Canada's Michael Smith Genome Sciences Centre
s17893	-0.496832	4.23598	Canada's Michael Smith Genome Sciences Centre
s17942	10.3091	6.83558	Canada's Michael Smith Genome Sciences Centre
s17909	-15.7495	8.66163	Canada's Michael Smith Genome Sciences Centre
s17954	-10.1751	-11.4758	Canada's Michael Smith Genome Sciences Centre
s17941	11.0241	3.43148	Canada's Michael Smith Genome Sciences Centre
s17949	-13.4081	-8.04825	Canada's Michael Smith Genome Sciences Centre
s17904	-4.88234	-4.23037	Canada's Michael Smith Genome Sciences Centre
s17902	-3.32583	-1.79878	Canada's Michael Smith Genome Sciences Centre
s17958	-31.9756	-12.6083	Canada's Michael Smith Genome Sciences Centre
s17951	4.46535	2.07347	Canada's Michael Smith Genome Sciences Centre
s17950	19.332	-6.99675	Baylor College of Medicine
s17916	4.55753	1.59476	Canada's Michael Smith Genome Sciences Centre
s17969	-1.94646	3.26917	Canada's Michael Smith Genome Sciences Centre
s17956	-13.8537	-7.16528	Canada's Michael Smith Genome Sciences Centre
s17925	-9.42496	1.8133	Canada's Michael Smith Genome Sciences Centre
s17933	-11.0261	1.64253	Canada's Michael Smith Genome Sciences Centre
s17961	-4.59597	5.20544	Baylor College of Medicine
s17935	9.70122	3.13002	Canada's Michael Smith Genome Sciences Centre
s17947	4.60577	5.76428	Canada's Michael Smith Genome Sciences Centre
s17897	-22.0496	-9.3926	Canada's Michael Smith Genome Sciences Centre
s17929	9.25432	-4.08845	Canada's Michael Smith Genome Sciences Centre
s17975	-2.23928	5.66526	Canada's Michael Smith Genome Sciences Centre
s17943	-11.1763	-6.81114	Canada's Michael Smith Genome Sciences Centre
s17977	-24.6951	-10.0694	Canada's Michael Smith Genome Sciences Centre
s17974	0.281061	-4.98782	Canada's Michael Smith Genome Sciences Centre
s17911	-3.08183	8.75944	Canada's Michael Smith Genome Sciences Centre
s17891	1.15149	-2.88555	Canada's Michael Smith Genome Sciences Centre
s17938	8.13272	-1.45018	Canada's Michael Smith Genome Sciences Centre
s17970	0.150921	0.743796	Canada's Michael Smith Genome Sciences Centre
s17953	-1.4783	-2.23143	Canada's Michael Smith Genome Sciences Centre
s17914	0.00970492	10.6606	Canada's Michael Smith Genome Sciences Centre
s17898	-5.8737	-7.81867	Canada's Michael Smith Genome Sciences Centre
s17965	2.0031	9.87819	Canada's Michael Smith Genome Sciences Centre
s17912	8.52689	10.9028	Canada's Michael Smith Genome Sciences Centre
s17903	4.4924	-5.58101	Canada's Michael Smith Genome Sciences Centre
s17900	10.0621	-1.43768	Canada's Michael Smith Genome Sciences Centre
s17934	-15.5234	-10.895	Canada's Michael Smith Genome Sciences Centre
s17936	4.15716	-3.48187	Canada's Michael Smith Genome Sciences Centre
s17892	4.11125	-6.05332	Canada's Michael Smith Genome Sciences Centre
s17966	6.20715	-2.65011	Canada's Michael Smith Genome Sciences Centre
s17944	1.81869	6.77374	Baylor College of Medicine
s17889	-13.3043	4.46729	Broad Institute of MIT and Harvard
s17973	2.5494	-8.45438	Canada's Michael Smith Genome Sciences Centre
s17913	17.8353	-4.73808	Canada's Michael Smith Genome Sciences Centre
s17952	-12.286	5.84855	Canada's Michael Smith Genome Sciences Centre
s17921	-1.83629	5.72256	Canada's Michael Smith Genome Sciences Centre
s17907	3.55003	5.63327	Canada's Michael Smith Genome Sciences Centre
s17946	-12.0468	-5.73065	Canada's Michael Smith Genome Sciences Centre
s17926	4.85074	-13.5371	Canada's Michael Smith Genome Sciences Centre
s17948	-15.7594	-0.0342028	Canada's Michael Smith Genome Sciences Centre
s17927	-1.61921	-10.6841	Canada's Michael Smith Genome Sciences Centre
s17963	12.5349	-2.30931	Canada's Michael Smith Genome Sciences Centre
s17937	-5.1264	2.29412	Canada's Michael Smith Genome Sciences Centre
s17971	-1.09772	-1.63592	Canada's Michael Smith Genome Sciences Centre
s17945	-1.70726	0.126952	Canada's Michael Smith Genome Sciences Centre
s17959	19.385	20.0635	Canada's Michael Smith Genome Sciences Centre
s17905	-13.8209	11.5561	Canada's Michael Smith Genome Sciences Centre
s17928	-12.2585	-18.5749	Canada's Michael Smith Genome Sciences Centre
s17896	-20.3083	-11.331	Canada's Michael Smith Genome Sciences Centre
s17967	-5.08791	0.204048	Canada's Michael Smith Genome Sciences Centre
s17890	0.904287	6.66878	Canada's Michael Smith Genome Sciences Centre
s17908	7.28595	3.56377	Canada's Michael Smith Genome Sciences Centre
s17968	-9.44264	6.0514	Canada's Michael Smith Genome Sciences Centre
s17894	-9.73224	0.283819	Canada's Michael Smith Genome Sciences Centre
s17918	-1.4111	10.6486	Canada's Michael Smith Genome Sciences Centre
s17931	2.28316	-4.11742	Canada's Michael Smith Genome Sciences Centre
s17932	-7.92359	-0.205033	Canada's Michael Smith Genome Sciences Centre
s17915	-13.5038	14.6131	Canada's Michael Smith Genome Sciences Centre
s17899	13.629	-8.70389	Baylor College of Medicine
s17922	11.2682	9.70303	Canada's Michael Smith Genome Sciences Centre
s17962	1.4599	-10.6845	Canada's Michael Smith Genome Sciences Centre
s17901	-11.6729	0.444764	Canada's Michael Smith Genome Sciences Centre
s17957	-13.2004	-7.03412	Canada's Michael Smith Genome Sciences Centre
s17919	11.4778	18.4367	Canada's Michael Smith Genome Sciences Centre
s17964	-4.01022	-4.89916	Canada's Michael Smith Genome Sciences Centre
s17930	-23.794	-14.5292	Canada's Michael Smith Genome Sciences Centre
s17325	-14.6007	-7.49783	Canada's Michael Smith Genome Sciences Centre
s17331	1.88446	5.30545	Canada's Michael Smith Genome Sciences Centre
s17343	3.55069	-10.3952	Canada's Michael Smith Genome Sciences Centre
s17328	28.04	21.1002	Canada's Michael Smith Genome Sciences Centre
s17341	2.83908	-4.73913	Canada's Michael Smith Genome Sciences Centre
s17342	-5.4068	6.22774	Canada's Michael Smith Genome Sciences Centre
s17345	0.561697	0.76134	Baylor College of Medicine
s17338	-26.2025	4.16056	Canada's Michael Smith Genome Sciences Centre
s17333	-6.67066	2.92741	Canada's Michael Smith Genome Sciences Centre
s17329	-16.7037	11.853	Canada's Michael Smith Genome Sciences Centre
s17324	-4.10007	-12.4567	Canada's Michael Smith Genome Sciences Centre
s17344	-35.1251	11.3752	Baylor College of Medicine
s17335	19.1808	3.06037	Canada's Michael Smith Genome Sciences Centre
s17334	25.683	-6.30243	Baylor College of Medicine
s17332	-30.1398	14.9965	Baylor College of Medicine
s17326	-9.42876	7.49826	Canada's Michael Smith Genome Sciences Centre
s17346	-8.01701	-9.3554	Canada's Michael Smith Genome Sciences Centre
s17336	20.838	10.5393	Canada's Michael Smith Genome Sciences Centre
s17323	-7.57306	-2.19397	Broad Institute of MIT and Harvard
s17340	-4.52588	-8.83023	Canada's Michael Smith Genome Sciences Centre
s17347	-11.2575	-6.94943	Canada's Michael Smith Genome Sciences Centre
s17557	20.3978	-6.1284	Canada's Michael Smith Genome Sciences Centre
s17547	-48.1277	-0.897568	Broad Institute of MIT and Harvard
s17570	0.129149	-6.89866	Canada's Michael Smith Genome Sciences Centre
s17581	1.26245	-4.29336	Canada's Michael Smith Genome Sciences Centre
s17584	6.58569	-4.87769	Canada's Michael Smith Genome Sciences Centre
s17563	22.5613	-5.0622	Baylor College of Medicine
s17585	-11.6844	-2.52392	Canada's Michael Smith Genome Sciences Centre
s17580	10.4841	0.626658	Canada's Michael Smith Genome Sciences Centre
s17571	3.6738	-3.18863	Canada's Michael Smith Genome Sciences Centre
s17561	-1.78185	4.75407	Canada's Michael Smith Genome Sciences Centre
s17554	-2.69391	-3.4996	Canada's Michael Smith Genome Sciences Centre
s17569	-2.18515	-11.4644	Canada's Michael Smith Genome Sciences Centre
s17573	1.26851	-0.878285	Canada's Michael Smith Genome Sciences Centre
s17550	-2.14528	-1.13441	Canada's Michael Smith Genome Sciences Centre
s17583	-7.89776	1.77438	Canada's Michael Smith Genome Sciences Centre
s17578	-2.32898	2.26522	Canada's Michael Smith Genome Sciences Centre
s17565	-15.2651	-4.4936	Canada's Michael Smith Genome Sciences Centre
s17549	25.9967	-9.27144	Baylor College of Medicine
s17577	-17.0023	12.3504	Canada's Michael Smith Genome Sciences Centre
s17562	19.6946	-6.42571	Baylor College of Medicine
s17551	13.7697	-10.7543	Baylor College of Medicine
s17567	0.484047	-7.40286	Canada's Michael Smith Genome Sciences Centre
s17576	-13.9751	-3.76338	Canada's Michael Smith Genome Sciences Centre
s17579	-1.6824	6.68335	Baylor College of Medicine
s17568	0.0925805	-2.439	Canada's Michael Smith Genome Sciences Centre
s17572	4.57669	-1.0577	Canada's Michael Smith Genome Sciences Centre
s17586	-27.5998	-0.171878	Washington University School of Medicine
s17548	3.99807	5.45973	Broad Institute of MIT and Harvard
s17560	-5.07425	7.30318	Canada's Michael Smith Genome Sciences Centre
s17558	-25.2247	13.4372	Baylor College of Medicine
s17556	4.03666	13.2017	Canada's Michael Smith Genome Sciences Centre
s17574	-1.91432	-6.85919	Canada's Michael Smith Genome Sciences Centre
s17575	11.5204	3.58353	Canada's Michael Smith Genome Sciences Centre
s17564	18.4088	7.29598	Canada's Michael Smith Genome Sciences Centre
s17582	4.47963	-2.93724	Canada's Michael Smith Genome Sciences Centre
s17552	-13.5256	-8.2357	Canada's Michael Smith Genome Sciences Centre
s17559	-0.69044	-6.95027	Canada's Michael Smith Genome Sciences Centre
s17566	23.5091	10.9388	Canada's Michael Smith Genome Sciences Centre
s17664	-0.242197	0.752348	Canada's Michael Smith Genome Sciences Centre
s17689	5.38529	0.981192	Baylor College of Medicine
s17698	-10.129	2.79664	Canada's Michael Smith Genome Sciences Centre
s17663	-13.4413	5.12672	Canada's Michael Smith Genome Sciences Centre
s17670	-11.5901	-4.54624	Canada's Michael Smith Genome Sciences Centre
s17672	-10.6187	15.2452	Baylor College of Medicine
s17690	-6.79899	4.73928	Canada's Michael Smith Genome Sciences Centre
s17656	-0.814284	-1.80673	Canada's Michael Smith Genome Sciences Centre
s17654	-14.742	15.4447	Baylor College of Medicine
s17653	-8.35017	17.7559	Canada's Michael Smith Genome Sciences Centre
s17679	-7.12083	-4.07401	Canada's Michael Smith Genome Sciences Centre
s17673	19.4303	-3.40615	Baylor College of Medicine
s17665	6.766	1.82241	Canada's Michael Smith Genome Sciences Centre
s17702	-19.5567	-5.78159	Canada's Michael Smith Genome Sciences Centre
s17677	25.5086	-4.19715	Baylor College of Medicine
s17657	0.299118	-3.57675	Baylor College of Medicine
s17668	-4.14408	14.1674	Canada's Michael Smith Genome Sciences Centre
s17678	-4.51476	-9.23667	Canada's Michael Smith Genome Sciences Centre
s17675	1.363	5.0136	Canada's Michael Smith Genome Sciences Centre
s17682	-14.063	1.73145	Canada's Michael Smith Genome Sciences Centre
s17691	1.38424	3.13864	Canada's Michael Smith Genome Sciences Centre
s17661	-61.5498	-5.08136	Washington University School of Medicine
s17652	-2.05562	0.151546	Broad Institute of MIT and Harvard
s17674	-9.39372	2.07713	Canada's Michael Smith Genome Sciences Centre
s17686	-12.3777	-8.15858	Canada's Michael Smith Genome Sciences Centre
s17659	4.99081	-0.378415	Canada's Michael Smith Genome Sciences Centre
s17692	15.9575	5.45499	Canada's Michael Smith Genome Sciences Centre
s17687	-7.53889	-5.36204	Canada's Michael Smith Genome Sciences Centre
s17685	-4.75304	11.7297	Canada's Michael Smith Genome Sciences Centre
s17671	14.3267	-11.0706	Canada's Michael Smith Genome Sciences Centre
s17666	-1.89319	1.59954	Canada's Michael Smith Genome Sciences Centre
s17700	7.06818	-13.4849	Canada's Michael Smith Genome Sciences Centre
s17669	19.8961	14.8611	Canada's Michael Smith Genome Sciences Centre
s17704	-6.19948	-1.41408	Canada's Michael Smith Genome Sciences Centre
s17660	-8.39485	-2.91363	Canada's Michael Smith Genome Sciences Centre
s17688	10.3896	-5.91854	Canada's Michael Smith Genome Sciences Centre
s17693	17.7007	5.56237	Canada's Michael Smith Genome Sciences Centre
s17701	-26.5747	17.9522	Baylor College of Medicine
s17683	-12.2211	0.505428	Canada's Michael Smith Genome Sciences Centre
s17676	-8.69094	6.7544	Canada's Michael Smith Genome Sciences Centre
s17697	-1.79657	-5.25492	Canada's Michael Smith Genome Sciences Centre
s17658	-24.8779	11.6193	Canada's Michael Smith Genome Sciences Centre
s17655	-17.0558	7.05323	Canada's Michael Smith Genome Sciences Centre
s17699	6.26593	-0.681385	Canada's Michael Smith Genome Sciences Centre
s17680	0.906596	11.7812	Canada's Michael Smith Genome Sciences Centre
s17694	-1.19931	0.821332	Canada's Michael Smith Genome Sciences Centre
s17662	-10.2608	3.20225	Canada's Michael Smith Genome Sciences Centre
s17695	2.6628	-4.26311	Canada's Michael Smith Genome Sciences Centre
s17667	10.0357	-17.8882	Canada's Michael Smith Genome Sciences Centre
s17684	-25.8894	-6.50696	Canada's Michael Smith Genome Sciences Centre
s17703	8.85328	-18.9486	Canada's Michael Smith Genome Sciences Centre
s17705	-2.45189	-5.63166	Canada's Michael Smith Genome Sciences Centre
s17681	-2.77077	7.19643	Canada's Michael Smith Genome Sciences Centre
s17696	15.1482	-5.79087	Canada's Michael Smith Genome Sciences Centre
s18083	-48.4331	-9.64948	Broad Institute of MIT and Harvard
s18108	-10.6135	12.8788	Canada's Michael Smith Genome Sciences Centre
s18137	2.81054	0.438516	Canada's Michael Smith Genome Sciences Centre
s18125	-17.6303	2.78515	Canada's Michael Smith Genome Sciences Centre
s18119	1.54597	3.40398	Canada's Michael Smith Genome Sciences Centre
s18130	3.12852	0.283608	Canada's Michael Smith Genome Sciences Centre
s18116	20.5435	-0.625605	Baylor College of Medicine
s18086	20.3992	-2.46106	Baylor College of Medicine
s18111	-3.36022	0.301678	Canada's Michael Smith Genome Sciences Centre
s18114	-5.7592	-3.69723	Canada's Michael Smith Genome Sciences Centre
s18103	-14.0901	3.56663	Canada's Michael Smith Genome Sciences Centre
s18102	-8.08689	6.24505	Canada's Michael Smith Genome Sciences Centre
s18093	5.52105	8.64056	Canada's Michael Smith Genome Sciences Centre
s18132	-2.1992	3.04086	Canada's Michael Smith Genome Sciences Centre
s18131	5.06334	-2.32611	Baylor College of Medicine
s18140	-15.1347	-12.8496	Canada's Michael Smith Genome Sciences Centre
s18099	2.7018	-4.79467	Canada's Michael Smith Genome Sciences Centre
s18144	4.66379	-14.5212	Canada's Michael Smith Genome Sciences Centre
s18088	-18.4306	14.6866	Canada's Michael Smith Genome Sciences Centre
s18112	-16.2781	4.87864	Canada's Michael Smith Genome Sciences Centre
s18090	-35.5589	15.4471	Canada's Michael Smith Genome Sciences Centre
s18136	7.3834	6.76948	Canada's Michael Smith Genome Sciences Centre
s18107	-11.1175	-9.69666	Canada's Michael Smith Genome Sciences Centre
s18129	-17.0747	-9.6468	Canada's Michael Smith Genome Sciences Centre
s18084	23.6007	10.2573	Canada's Michael Smith Genome Sciences Centre
s18139	-14.4052	2.48641	Canada's Michael Smith Genome Sciences Centre
s18123	5.35823	-3.48748	Canada's Michael Smith Genome Sciences Centre
s18138	6.9945	2.79957	Canada's Michael Smith Genome Sciences Centre
s18143	-14.9262	-11.1849	Canada's Michael Smith Genome Sciences Centre
s18121	-4.17104	4.34064	Canada's Michael Smith Genome Sciences Centre
s18091	0.119678	17.1317	Canada's Michael Smith Genome Sciences Centre
s18128	-0.312863	-2.21868	Canada's Michael Smith Genome Sciences Centre
s18127	-11.2894	7.49056	Canada's Michael Smith Genome Sciences Centre
s18122	0.617464	8.55292	Canada's Michael Smith Genome Sciences Centre
s18135	11.5701	1.36049	Canada's Michael Smith Genome Sciences Centre
s18126	-15.6429	5.19789	Canada's Michael Smith Genome Sciences Centre
s18118	-8.19768	5.95864	Canada's Michael Smith Genome Sciences Centre
s18145	-3.54034	-8.16961	Canada's Michael Smith Genome Sciences Centre
s18101	-13.5464	8.35189	Canada's Michael Smith Genome Sciences Centre
s18113	2.18421	3.52293	Canada's Michael Smith Genome Sciences Centre
s18104	-14.2979	5.70801	Canada's Michael Smith Genome Sciences Centre
s18133	-7.60884	-5.32663	Canada's Michael Smith Genome Sciences Centre
s18142	0.209751	-2.11604	Canada's Michael Smith Genome Sciences Centre
s18124	-1.48527	-11.5031	Canada's Michael Smith Genome Sciences Centre
s18094	9.81667	9.77761	Canada's Michael Smith Genome Sciences Centre
s18134	-11.4898	9.99002	Canada's Michael Smith Genome Sciences Centre
s18106	9.83159	-1.34322	Canada's Michael Smith Genome Sciences Centre
s18110	-13.8077	-2.96478	Canada's Michael Smith Genome Sciences Centre
s18141	-16.4556	-8.82334	Canada's Michael Smith Genome Sciences Centre
s18100	-3.72593	16.8665	Canada's Michael Smith Genome Sciences Centre
s18081	-33.713	1.7074	Washington University School of Medicine
s18146	-0.54285	3.84104	Canada's Michael Smith Genome Sciences Centre
s18120	-9.80407	8.17264	Canada's Michael Smith Genome Sciences Centre
s18115	21.4001	20.6992	Canada's Michael Smith Genome Sciences Centre
s18105	-15.4387	-1.89608	Canada's Michael Smith Genome Sciences Centre
s18085	-17.9931	24.3823	Baylor College of Medicine
s18096	30.8311	-6.36688	Baylor College of Medicine
s18109	-16.8047	-2.11694	Canada's Michael Smith Genome Sciences Centre
s18095	-7.61352	4.8546	Canada's Michael Smith Genome Sciences Centre
s18089	-25.115	0.398721	Washington University School of Medicine
s18082	-29.9282	4.94993	Washington University School of Medicine
s18097	-8.02724	3.70807	Canada's Michael Smith Genome Sciences Centre
s18087	3.54708	-16.5405	Canada's Michael Smith Genome Sciences Centre
s18098	-0.410356	6.77685	Canada's Michael Smith Genome Sciences Centre
s18117	-15.2368	18.302	Baylor College of Medicine
s17211	-13.8036	-16.2043	Canada's Michael Smith Genome Sciences Centre
s17224	3.10133	-5.63331	Canada's Michael Smith Genome Sciences Centre
s17264	-5.36594	1.25009	Canada's Michael Smith Genome Sciences Centre
s17230	6.25832	3.86168	Canada's Michael Smith Genome Sciences Centre
s17260	5.35593	1.72123	Canada's Michael Smith Genome Sciences Centre
s17279	-1.23742	-2.0884	Canada's Michael Smith Genome Sciences Centre
s17209	-12.988	-15.0043	Canada's Michael Smith Genome Sciences Centre
s17266	-0.23922	4.993	Canada's Michael Smith Genome Sciences Centre
s17275	1.08943	-6.02394	Canada's Michael Smith Genome Sciences Centre
s17270	-3.76944	0.458558	Canada's Michael Smith Genome Sciences Centre
s17263	-2.59241	-6.97104	Canada's Michael Smith Genome Sciences Centre
s17204	5.24849	4.2109	Broad Institute of MIT and Harvard
s17267	-3.79678	-3.40193	Canada's Michael Smith Genome Sciences Centre
s17248	20.9794	1.66225	Canada's Michael Smith Genome Sciences Centre
s17236	10.0944	-5.37401	Canada's Michael Smith Genome Sciences Centre
s17232	-11.4189	-6.97547	Canada's Michael Smith Genome Sciences Centre
s17239	-1.94755	-9.69487	Canada's Michael Smith Genome Sciences Centre
s17262	4.17158	-0.83759	Canada's Michael Smith Genome Sciences Centre
s17272	-8.74694	-5.97874	Canada's Michael Smith Genome Sciences Centre
s17258	18.0081	-11.5013	Baylor College of Medicine
s17227	-32.9964	14.6523	Canada's Michael Smith Genome Sciences Centre
s17234	16.1356	-12.6739	Canada's Michael Smith Genome Sciences Centre
s17208	-7.6992	-10.2451	Canada's Michael Smith Genome Sciences Centre
s17276	6.88093	-7.44673	Canada's Michael Smith Genome Sciences Centre
s17250	11.2135	4.57842	Canada's Michael Smith Genome Sciences Centre
s17219	0.175029	9.60632	Canada's Michael Smith Genome Sciences Centre
s17205	26.5333	-3.75957	Baylor College of Medicine
s17217	13.48	-13.3844	Canada's Michael Smith Genome Sciences Centre
s17243	-7.93054	-2.38205	Canada's Michael Smith Genome Sciences Centre
s17252	-5.43588	1.78227	Canada's Michael Smith Genome Sciences Centre
s17271	0.525928	-5.04851	Canada's Michael Smith Genome Sciences Centre
s17223	-2.96379	8.78255	Canada's Michael Smith Genome Sciences Centre
s17226	0.361752	1.74138	Canada's Michael Smith Genome Sciences Centre
s17257	-15.3353	-16.2315	Canada's Michael Smith Genome Sciences Centre
s17207	17.0491	-4.48508	Baylor College of Medicine
s17259	-5.95161	0.088413	Canada's Michael Smith Genome Sciences Centre
s17237	4.05744	-1.48723	Canada's Michael Smith Genome Sciences Centre
s17241	1.39572	-1.14418	Canada's Michael Smith Genome Sciences Centre
s17240	13.0846	4.14359	Canada's Michael Smith Genome Sciences Centre
s17242	4.7338	-9.15643	Canada's Michael Smith Genome Sciences Centre
s17216	7.92305	2.08137	Canada's Michael Smith Genome Sciences Centre
s17249	3.15367	-8.62652	Canada's Michael Smith Genome Sciences Centre
s17233	4.46101	-7.54566	Canada's Michael Smith Genome Sciences Centre
s17255	-17.984	7.38815	Canada's Michael Smith Genome Sciences Centre
s17213	-1.78903	15.4367	Canada's Michael Smith Genome Sciences Centre
s17268	-0.228178	-0.945366	Canada's Michael Smith Genome Sciences Centre
s17244	18.1957	-2.8998	Canada's Michael Smith Genome Sciences Centre
s17269	-0.557706	0.236537	Canada's Michael Smith Genome Sciences Centre
s17254	-6.39179	-10.843	Canada's Michael Smith Genome Sciences Centre
s17212	-3.27659	3.409	Canada's Michael Smith Genome Sciences Centre
s17206	6.52209	4.64551	Canada's Michael Smith Genome Sciences Centre
s17214	5.30518	4.22596	Canada's Michael Smith Genome Sciences Centre
s17278	8.26913	6.6108	Canada's Michael Smith Genome Sciences Centre
s17229	-12.7835	-7.50629	Canada's Michael Smith Genome Sciences Centre
s17274	0.886424	-7.68684	Canada's Michael Smith Genome Sciences Centre
s17218	6.71188	9.28081	Canada's Michael Smith Genome Sciences Centre
s17225	-0.731713	6.52073	Canada's Michael Smith Genome Sciences Centre
s17221	-7.70512	3.49086	Canada's Michael Smith Genome Sciences Centre
s17256	-9.28003	-0.740503	Canada's Michael Smith Genome Sciences Centre
s17277	12.6501	-0.29758	Canada's Michael Smith Genome Sciences Centre
s17210	-8.69952	-1.33083	Canada's Michael Smith Genome Sciences Centre
s17222	-8.93142	4.76803	Canada's Michael Smith Genome Sciences Centre
s17247	-11.8812	-7.68501	Canada's Michael Smith Genome Sciences Centre
s17220	-25.2331	13.3343	Canada's Michael Smith Genome Sciences Centre
s17246	31.4471	-6.17698	Canada's Michael Smith Genome Sciences Centre
s17265	-24.2886	9.5665	Baylor College of Medicine
s17235	17.5659	-14.4443	Canada's Michael Smith Genome Sciences Centre
s17231	1.48299	-7.75609	Canada's Michael Smith Genome Sciences Centre
s17261	-12.5798	-2.36052	Canada's Michael Smith Genome Sciences Centre
s17215	-9.80517	-2.39416	Canada's Michael Smith Genome Sciences Centre
s17228	4.64323	9.34807	Canada's Michael Smith Genome Sciences Centre
s17203	-6.12053	7.99695	Broad Institute of MIT and Harvard
s17251	3.29203	-1.359	Canada's Michael Smith Genome Sciences Centre
s17238	-3.36074	-8.38142	Canada's Michael Smith Genome Sciences Centre
s17253	-11.6523	-7.18942	Canada's Michael Smith Genome Sciences Centre
s17273	0.226052	-6.12135	Canada's Michael Smith Genome Sciences Centre
s17245	0.509264	-5.87931	Canada's Michael Smith Genome Sciences Centre
s17855	-5.71165	4.36709	Canada's Michael Smith Genome Sciences Centre
s17819	6.50677	10.491	Canada's Michael Smith Genome Sciences Centre
s17858	1.28176	-7.19998	Canada's Michael Smith Genome Sciences Centre
s17817	28.6617	-5.42788	Baylor College of Medicine
s17800	-24.6608	9.94067	Broad Institute of MIT and Harvard
s17833	-5.43251	12.1921	Canada's Michael Smith Genome Sciences Centre
s17840	-4.20138	-6.38121	Canada's Michael Smith Genome Sciences Centre
s17853	4.76017	-3.67279	Canada's Michael Smith Genome Sciences Centre
s17850	6.89615	-6.74858	Canada's Michael Smith Genome Sciences Centre
s17828	-9.88097	6.5368	Canada's Michael Smith Genome Sciences Centre
s17845	2.4976	-10.712	Canada's Michael Smith Genome Sciences Centre
s17835	-11.1646	-4.91789	Canada's Michael Smith Genome Sciences Centre
s17814	12.8752	-1.23636	Canada's Michael Smith Genome Sciences Centre
s17825	26.1397	17.2091	Canada's Michael Smith Genome Sciences Centre
s17826	-0.646235	-1.39272	Canada's Michael Smith Genome Sciences Centre
s17801	-14.1767	-2.07822	Broad Institute of MIT and Harvard
s17812	-5.7611	-5.69507	Canada's Michael Smith Genome Sciences Centre
s17821	7.32789	7.88819	Canada's Michael Smith Genome Sciences Centre
s17816	-1.62267	7.12012	Canada's Michael Smith Genome Sciences Centre
s17808	-13.2086	1.83553	Canada's Michael Smith Genome Sciences Centre
s17822	-1.02811	-9.19364	Washington University School of Medicine
s17803	-2.31837	-8.4449	Canada's Michael Smith Genome Sciences Centre
s17844	-18.444	-4.60838	Canada's Michael Smith Genome Sciences Centre
s17848	3.99527	-12.4603	Canada's Michael Smith Genome Sciences Centre
s17810	-7.38109	-13.428	Canada's Michael Smith Genome Sciences Centre
s17834	13.4942	-10.7181	Canada's Michael Smith Genome Sciences Centre
s17837	15.2235	-4.07844	Canada's Michael Smith Genome Sciences Centre
s17854	17.7156	-5.90894	Canada's Michael Smith Genome Sciences Centre
s17852	17.669	-2.99449	Baylor College of Medicine
s17832	2.03061	-5.18744	Canada's Michael Smith Genome Sciences Centre
s17829	8.07058	2.15276	Canada's Michael Smith Genome Sciences Centre
s17802	-3.5368	2.58689	Canada's Michael Smith Genome Sciences Centre
s17859	-9.68456	13.8799	Canada's Michael Smith Genome Sciences Centre
s17841	-9.43343	-1.50941	Canada's Michael Smith Genome Sciences Centre
s17836	40.148	-4.40898	Baylor College of Medicine
s17827	-1.57854	-6.99119	Canada's Michael Smith Genome Sciences Centre
s17857	-6.31563	-15.4618	Canada's Michael Smith Genome Sciences Centre
s17820	-13.1384	-8.47619	Canada's Michael Smith Genome Sciences Centre
s17804	3.80432	7.20581	Canada's Michael Smith Genome Sciences Centre
s17851	7.27801	-7.52564	Canada's Michael Smith Genome Sciences Centre
s17818	23.2164	22.3838	Canada's Michael Smith Genome Sciences Centre
s17847	-13.1272	-0.507846	Canada's Michael Smith Genome Sciences Centre
s17849	-0.189698	-9.53334	Canada's Michael Smith Genome Sciences Centre
s17830	3.70579	5.1888	Canada's Michael Smith Genome Sciences Centre
s17807	-10.3567	9.94037	Canada's Michael Smith Genome Sciences Centre
s17843	-7.67714	-6.79656	Canada's Michael Smith Genome Sciences Centre
s17809	-13.3683	-2.42319	Canada's Michael Smith Genome Sciences Centre
s17846	-23.0856	5.87489	Canada's Michael Smith Genome Sciences Centre
s17815	1.73518	11.9701	Canada's Michael Smith Genome Sciences Centre
s17831	-0.767896	-1.36459	Canada's Michael Smith Genome Sciences Centre
s17824	-1.57499	5.34158	Canada's Michael Smith Genome Sciences Centre
s17805	-5.37102	-13.5625	Canada's Michael Smith Genome Sciences Centre
s17839	-0.233586	8.39209	Canada's Michael Smith Genome Sciences Centre
s17811	1.60196	-2.49262	Canada's Michael Smith Genome Sciences Centre
s17813	-10.9419	9.9226	Canada's Michael Smith Genome Sciences Centre
s17842	-84.9344	-3.35101	Broad Institute of MIT and Harvard
s17823	4.00055	0.41946	Canada's Michael Smith Genome Sciences Centre
s17838	11.0177	-2.95227	Canada's Michael Smith Genome Sciences Centre
s17856	-7.99686	-4.06781	Canada's Michael Smith Genome Sciences Centre
s17806	-7.09875	0.743056	Canada's Michael Smith Genome Sciences Centre
s17860	5.9466	-5.0139	Canada's Michael Smith Genome Sciences Centre
s17425	-13.8507	7.71562	Canada's Michael Smith Genome Sciences Centre
s17471	-2.13431	-5.52956	Canada's Michael Smith Genome Sciences Centre
s17474	10.7276	4.18752	Canada's Michael Smith Genome Sciences Centre
s17413	-2.32575	4.59944	Canada's Michael Smith Genome Sciences Centre
s17455	1.07585	-1.04631	Canada's Michael Smith Genome Sciences Centre
s17445	-2.00631	7.9289	Canada's Michael Smith Genome Sciences Centre
s17430	5.71178	-14.8747	Canada's Michael Smith Genome Sciences Centre
s17427	0.89691	9.81053	Canada's Michael Smith Genome Sciences Centre
s17447	12.5141	-12.8912	Canada's Michael Smith Genome Sciences Centre
s17466	-4.03106	11.9214	Canada's Michael Smith Genome Sciences Centre
s17433	-8.55827	1.49287	Canada's Michael Smith Genome Sciences Centre
s17419	12.1548	-2.79915	Canada's Michael Smith Genome Sciences Centre
s17424	4.66918	12.0611	Canada's Michael Smith Genome Sciences Centre
s17408	-1.35199	0.451527	Broad Institute of MIT and Harvard
s17473	25.6795	-4.69508	Baylor College of Medicine
s17467	2.53367	-5.10973	Canada's Michael Smith Genome Sciences Centre
s17416	9.15011	14.6389	Canada's Michael Smith Genome Sciences Centre
s17459	-13.4802	-7.34559	Canada's Michael Smith Genome Sciences Centre
s17428	-7.21485	-6.56263	Canada's Michael Smith Genome Sciences Centre
s17420	-1.1656	-9.94216	Canada's Michael Smith Genome Sciences Centre
s17469	-6.89052	-4.48544	Canada's Michael Smith Genome Sciences Centre
s17453	23.9612	-10.3019	Baylor College of Medicine
s17462	-3.67864	-2.33693	Canada's Michael Smith Genome Sciences Centre
s17457	7.13249	-5.18249	Canada's Michael Smith Genome Sciences Centre
s17477	-0.937659	0.73455	Canada's Michael Smith Genome Sciences Centre
s17438	8.42491	0.886735	Canada's Michael Smith Genome Sciences Centre
s17429	26.9845	20.6253	Canada's Michael Smith Genome Sciences Centre
s17468	0.738175	-8.62321	Canada's Michael Smith Genome Sciences Centre
s17405	-37.8039	-11.1781	Broad Institute of MIT and Harvard
s17449	-3.12908	5.2985	Canada's Michael Smith Genome Sciences Centre
s17475	3.10149	-15.6652	Canada's Michael Smith Genome Sciences Centre
s17406	-21.2064	5.86881	Broad Institute of MIT and Harvard
s17421	-1.35718	-6.0727	Canada's Michael Smith Genome Sciences Centre
s17434	8.04477	11.6144	Canada's Michael Smith Genome Sciences Centre
s17465	-19.199	-1.04512	Canada's Michael Smith Genome Sciences Centre
s17443	-12.2519	-6.55939	Canada's Michael Smith Genome Sciences Centre
s17476	-0.299651	-13.3183	Canada's Michael Smith Genome Sciences Centre
s17410	-5.10772	1.58199	Broad Institute of MIT and Harvard
s17461	-14.1533	-4.18545	Canada's Michael Smith Genome Sciences Centre
s17432	5.11378	-7.79549	Canada's Michael Smith Genome Sciences Centre
s17442	3.97023	-0.178208	Canada's Michael Smith Genome Sciences Centre
s17440	-7.88734	-5.67071	Canada's Michael Smith Genome Sciences Centre
s17422	-16.6129	-2.15994	Canada's Michael Smith Genome Sciences Centre
s17451	-14.4833	-2.42154	Canada's Michael Smith Genome Sciences Centre
s17409	-17.2479	2.64898	Broad Institute of MIT and Harvard
s17431	6.71148	8.27893	Canada's Michael Smith Genome Sciences Centre
s17417	-21.257	9.04774	Canada's Michael Smith Genome Sciences Centre
s17423	-13.7551	7.6101	Canada's Michael Smith Genome Sciences Centre
s17464	-8.44639	-5.82304	Canada's Michael Smith Genome Sciences Centre
s17460	5.36625	8.20809	Canada's Michael Smith Genome Sciences Centre
s17452	-16.9774	1.99618	Canada's Michael Smith Genome Sciences Centre
s17437	6.6484	6.13833	Canada's Michael Smith Genome Sciences Centre
s17412	-10.1014	16.966	Baylor College of Medicine
s17439	-11.5921	10.4562	Canada's Michael Smith Genome Sciences Centre
s17454	-4.92862	-3.72366	Canada's Michael Smith Genome Sciences Centre
s17472	-13.1003	-14.6686	Baylor College of Medicine
s17470	-6.6076	-2.23376	Canada's Michael Smith Genome Sciences Centre
s17414	4.34371	1.44528	Canada's Michael Smith Genome Sciences Centre
s17456	-0.150102	-7.51012	Canada's Michael Smith Genome Sciences Centre
s17448	1.90145	-2.18645	Canada's Michael Smith Genome Sciences Centre
s17407	10.1783	6.55192	Broad Institute of MIT and Harvard
s17435	-8.53666	-5.09945	Canada's Michael Smith Genome Sciences Centre
s17426	9.65524	6.8016	Canada's Michael Smith Genome Sciences Centre
s17436	8.21965	2.11819	Canada's Michael Smith Genome Sciences Centre
s17441	5.29204	-8.51299	Canada's Michael Smith Genome Sciences Centre
s17458	-2.24552	12.5402	Canada's Michael Smith Genome Sciences Centre
s17444	4.92957	3.4196	Canada's Michael Smith Genome Sciences Centre
s17411	-8.01534	-11.0246	Canada's Michael Smith Genome Sciences Centre
s17415	-10.1103	-16.8526	Canada's Michael Smith Genome Sciences Centre
s17418	-3.05949	-15.9812	Canada's Michael Smith Genome Sciences Centre
s17446	-9.82944	14.2506	Canada's Michael Smith Genome Sciences Centre
s17450	-7.70705	-15.6479	Canada's Michael Smith Genome Sciences Centre
s17463	-15.6831	25.7667	Baylor College of Medicine
s17629	-25.5708	-4.7888	Canada's Michael Smith Genome Sciences Centre
s17615	10.3749	-6.77873	Canada's Michael Smith Genome Sciences Centre
s17605	-8.04872	8.38997	Canada's Michael Smith Genome Sciences Centre
s17637	0.865633	-2.57353	Canada's Michael Smith Genome Sciences Centre
s17625	3.92432	10.5644	Canada's Michael Smith Genome Sciences Centre
s17620	-17.3945	25.8452	Baylor College of Medicine
s17631	-8.65671	-9.26895	Canada's Michael Smith Genome Sciences Centre
s17607	-3.88408	6.69172	Canada's Michael Smith Genome Sciences Centre
s17642	5.90671	-6.67042	Canada's Michael Smith Genome Sciences Centre
s17614	-44.8679	-2.10742	Washington University School of Medicine
s17612	-2.81868	-7.85042	Canada's Michael Smith Genome Sciences Centre
s17651	-25.778	4.43684	Washington University School of Medicine
s17617	-17.2916	-2.34267	Canada's Michael Smith Genome Sciences Centre
s17610	34.4071	-5.11609	Baylor College of Medicine
s17626	-15.8622	10.3423	Canada's Michael Smith Genome Sciences Centre
s17644	5.54979	1.27415	Canada's Michael Smith Genome Sciences Centre
s17622	10.9227	-11.7354	Canada's Michael Smith Genome Sciences Centre
s17616	-0.614371	-2.62846	Canada's Michael Smith Genome Sciences Centre
s17598	8.40599	11.1459	Canada's Michael Smith Genome Sciences Centre
s17623	3.16858	-16.8999	Canada's Michael Smith Genome Sciences Centre
s17604	6.6561	5.99165	Canada's Michael Smith Genome Sciences Centre
s17613	-1.02751	16.0908	Canada's Michael Smith Genome Sciences Centre
s17600	10.9205	-2.58811	Baylor College of Medicine
s17591	-8.15969	1.11726	Canada's Michael Smith Genome Sciences Centre
s17588	-59.9203	-2.03083	Broad Institute of MIT and Harvard
s17608	2.66269	4.69934	Canada's Michael Smith Genome Sciences Centre
s17609	-10.7858	8.76628	Canada's Michael Smith Genome Sciences Centre
s17635	7.64547	-5.9443	Canada's Michael Smith Genome Sciences Centre
s17589	-4.85359	1.90885	Broad Institute of MIT and Harvard
s17603	8.42033	8.07444	Canada's Michael Smith Genome Sciences Centre
s17611	-4.92704	-0.229501	Canada's Michael Smith Genome Sciences Centre
s17602	-2.83757	0.126278	Canada's Michael Smith Genome Sciences Centre
s17628	8.89137	4.80122	Canada's Michael Smith Genome Sciences Centre
s17648	-5.63229	0.124526	Canada's Michael Smith Genome Sciences Centre
s17634	1.93066	0.946808	Canada's Michael Smith Genome Sciences Centre
s17640	10.2153	-4.95853	Canada's Michael Smith Genome Sciences Centre
s17636	7.09864	-1.20242	Canada's Michael Smith Genome Sciences Centre
s17645	-4.25522	-15.1811	Canada's Michael Smith Genome Sciences Centre
s17606	-19.617	6.4566	Canada's Michael Smith Genome Sciences Centre
s17599	-2.81018	-6.94679	Canada's Michael Smith Genome Sciences Centre
s17597	-27.6457	1.11687	Canada's Michael Smith Genome Sciences Centre
s17595	-6.71568	-5.61869	Canada's Michael Smith Genome Sciences Centre
s17630	-4.09167	-11.5508	Canada's Michael Smith Genome Sciences Centre
s17639	-6.78721	-6.21178	Canada's Michael Smith Genome Sciences Centre
s17638	1.15687	0.862018	Canada's Michael Smith Genome Sciences Centre
s17650	3.26792	-8.93082	Canada's Michael Smith Genome Sciences Centre
s17649	-3.8476	-5.95441	Canada's Michael Smith Genome Sciences Centre
s17647	21.0296	-5.06878	Canada's Michael Smith Genome Sciences Centre
s17624	-13.4034	10.2146	Canada's Michael Smith Genome Sciences Centre
s17641	-0.565584	-5.9987	Canada's Michael Smith Genome Sciences Centre
s17596	-5.34159	-2.94596	Canada's Michael Smith Genome Sciences Centre
s17590	-11.7617	17.7409	Baylor College of Medicine
s17601	6.91802	8.37579	Canada's Michael Smith Genome Sciences Centre
s17627	0.482322	4.03646	Canada's Michael Smith Genome Sciences Centre
s17646	-18.3843	-4.0921	Canada's Michael Smith Genome Sciences Centre
s17633	-13.9063	6.97292	Canada's Michael Smith Genome Sciences Centre
s17592	-6.39836	-11.2568	Canada's Michael Smith Genome Sciences Centre
s17587	-66.0656	-1.87612	Broad Institute of MIT and Harvard
s17593	2.81459	-6.27088	Canada's Michael Smith Genome Sciences Centre
s17618	-26.0064	7.52802	Canada's Michael Smith Genome Sciences Centre
s17643	15.4731	-3.81493	Canada's Michael Smith Genome Sciences Centre
s17632	3.98382	1.41787	Canada's Michael Smith Genome Sciences Centre
s17621	-9.6761	3.0553	Canada's Michael Smith Genome Sciences Centre
s17619	2.73329	5.41842	Canada's Michael Smith Genome Sciences Centre
s17594	-15.053	18.2624	Canada's Michael Smith Genome Sciences Centre
s17764	5.629	8.20584	Canada's Michael Smith Genome Sciences Centre
s17793	0.283233	7.07331	Canada's Michael Smith Genome Sciences Centre
s17787	-6.95917	-10.635	Canada's Michael Smith Genome Sciences Centre
s17777	15.1416	-0.594999	Canada's Michael Smith Genome Sciences Centre
s17791	-7.89981	-4.14398	Canada's Michael Smith Genome Sciences Centre
s17780	-4.76521	0.271212	Canada's Michael Smith Genome Sciences Centre
s17762	-17.1617	-8.88147	Canada's Michael Smith Genome Sciences Centre
s17766	-2.09277	14.6191	Canada's Michael Smith Genome Sciences Centre
s17790	3.63751	-3.62785	Canada's Michael Smith Genome Sciences Centre
s17799	-13.9276	13.2436	Baylor College of Medicine
s17792	-8.29902	3.35824	Canada's Michael Smith Genome Sciences Centre
s17779	-5.62825	-6.29028	Canada's Michael Smith Genome Sciences Centre
s17778	22.4881	12.5899	Canada's Michael Smith Genome Sciences Centre
s17798	-20.7536	21.1173	Baylor College of Medicine
s17774	-22.5372	0.930964	Canada's Michael Smith Genome Sciences Centre
s17763	-9.753	23.0841	Baylor College of Medicine
s17781	5.72625	-4.76976	Canada's Michael Smith Genome Sciences Centre
s17784	-0.108652	-1.5813	Canada's Michael Smith Genome Sciences Centre
s17783	21.2529	-3.24513	Baylor College of Medicine
s17794	-10.9509	8.54041	Canada's Michael Smith Genome Sciences Centre
s17771	11.5311	1.247	Canada's Michael Smith Genome Sciences Centre
s17788	-2.89032	-7.01148	Canada's Michael Smith Genome Sciences Centre
s17773	10.957	2.69763	Canada's Michael Smith Genome Sciences Centre
s17797	3.5626	-3.70833	Canada's Michael Smith Genome Sciences Centre
s17765	-3.90161	0.128568	Canada's Michael Smith Genome Sciences Centre
s17775	-10.2717	14.1046	Canada's Michael Smith Genome Sciences Centre
s17767	11.8206	-16.9177	Canada's Michael Smith Genome Sciences Centre
s17768	-35.8676	2.23861	Canada's Michael Smith Genome Sciences Centre
s17769	-12.8368	12.2578	Canada's Michael Smith Genome Sciences Centre
s17795	-13.1735	-2.5768	Canada's Michael Smith Genome Sciences Centre
s17776	16.597	-3.73726	Baylor College of Medicine
s17796	25.857	-4.71168	Baylor College of Medicine
s17772	-22.2159	17.0963	Canada's Michael Smith Genome Sciences Centre
s17760	-20.6144	2.5438	Broad Institute of MIT and Harvard
s17786	2.07045	-5.77077	Canada's Michael Smith Genome Sciences Centre
s17761	-13.1279	5.29864	Broad Institute of MIT and Harvard
s17789	3.6521	1.332	Canada's Michael Smith Genome Sciences Centre
s17782	14.4783	-4.10229	Canada's Michael Smith Genome Sciences Centre
s17770	-26.8939	14.4531	Baylor College of Medicine
s17785	-9.56665	-2.57047	Canada's Michael Smith Genome Sciences Centre
s18000	-9.30033	3.45209	Canada's Michael Smith Genome Sciences Centre
s17982	-11.8749	19.0715	Canada's Michael Smith Genome Sciences Centre
s17978	-69.3122	-8.43905	Broad Institute of MIT and Harvard
s17989	-9.24606	-6.93411	Canada's Michael Smith Genome Sciences Centre
s18011	15.2808	-16.4703	Canada's Michael Smith Genome Sciences Centre
s17993	5.9465	-8.80858	Canada's Michael Smith Genome Sciences Centre
s17985	7.23145	1.69344	Canada's Michael Smith Genome Sciences Centre
s17980	-79.1444	-14.5991	Broad Institute of MIT and Harvard
s17987	-33.5776	16.3273	Canada's Michael Smith Genome Sciences Centre
s17979	-3.29796	1.03613	Baylor College of Medicine
s17990	-8.96323	-4.45246	Canada's Michael Smith Genome Sciences Centre
s18012	0.628238	-10.0474	Canada's Michael Smith Genome Sciences Centre
s17996	22.353	-8.83468	Canada's Michael Smith Genome Sciences Centre
s18002	-15.0918	-1.19747	Canada's Michael Smith Genome Sciences Centre
s17994	-3.02933	7.99889	Canada's Michael Smith Genome Sciences Centre
s17983	-0.731029	5.8567	Canada's Michael Smith Genome Sciences Centre
s17998	9.71308	1.54681	Canada's Michael Smith Genome Sciences Centre
s18005	2.82333	-17.2053	Baylor College of Medicine
s17984	12.366	8.33193	Canada's Michael Smith Genome Sciences Centre
s17992	-6.21034	9.40752	Canada's Michael Smith Genome Sciences Centre
s17991	5.03262	13.8777	Canada's Michael Smith Genome Sciences Centre
s17995	-6.03084	1.12929	Canada's Michael Smith Genome Sciences Centre
s18009	-3.7537	11.5908	Canada's Michael Smith Genome Sciences Centre
s17981	13.8095	17.3015	Canada's Michael Smith Genome Sciences Centre
s18004	-13.6125	1.85451	Baylor College of Medicine
s17988	-22.3669	-4.08061	Canada's Michael Smith Genome Sciences Centre
s18015	9.23555	-17.2264	Baylor College of Medicine
s17997	0.482325	1.13256	Canada's Michael Smith Genome Sciences Centre
s17999	0.387663	-0.565016	Canada's Michael Smith Genome Sciences Centre
s18016	31.7202	-8.02014	Canada's Michael Smith Genome Sciences Centre
s18013	-7.87047	-3.14265	Canada's Michael Smith Genome Sciences Centre
s18006	0.287037	4.91088	Canada's Michael Smith Genome Sciences Centre
s18008	6.12661	-1.3645	Canada's Michael Smith Genome Sciences Centre
s18010	0.122192	-6.68857	Canada's Michael Smith Genome Sciences Centre
s18003	2.34602	-8.78793	Canada's Michael Smith Genome Sciences Centre
s18001	-8.85082	-3.90167	Canada's Michael Smith Genome Sciences Centre
s17986	-11.1317	18.6457	Canada's Michael Smith Genome Sciences Centre
s18014	-0.148089	-7.98812	Canada's Michael Smith Genome Sciences Centre
s18007	-5.01992	-10.3225	Canada's Michael Smith Genome Sciences Centre
s18078	5.88517	-3.99958	Canada's Michael Smith Genome Sciences Centre
s18066	-4.48995	-2.59099	Canada's Michael Smith Genome Sciences Centre
s18022	-12.6536	4.70478	Broad Institute of MIT and Harvard
s18054	1.19935	0.430062	Canada's Michael Smith Genome Sciences Centre
s18049	-9.55115	-4.15757	Canada's Michael Smith Genome Sciences Centre
s18074	-14.3406	-3.43349	Canada's Michael Smith Genome Sciences Centre
s18029	-17.9161	-2.26129	Canada's Michael Smith Genome Sciences Centre
s18037	-23.8271	0.611829	Canada's Michael Smith Genome Sciences Centre
s18017	-33.0237	0.493427	Washington University School of Medicine
s18059	-6.77884	9.81866	Canada's Michael Smith Genome Sciences Centre
s18067	9.58686	-2.42162	Canada's Michael Smith Genome Sciences Centre
s18025	-10.9968	2.68814	Canada's Michael Smith Genome Sciences Centre
s18018	-63.0743	-0.583433	Broad Institute of MIT and Harvard
s18019	-8.12595	0.58572	Broad Institute of MIT and Harvard
s18021	-20.5423	-1.12383	Broad Institute of MIT and Harvard
s18050	-16.2299	3.43758	Canada's Michael Smith Genome Sciences Centre
s18044	17.5526	-9.67023	Canada's Michael Smith Genome Sciences Centre
s18051	-3.16122	3.37379	Canada's Michael Smith Genome Sciences Centre
s18040	23.2464	18.4626	Canada's Michael Smith Genome Sciences Centre
s18077	-3.40514	-0.400716	Canada's Michael Smith Genome Sciences Centre
s18062	-16.4331	-3.70589	Canada's Michael Smith Genome Sciences Centre
s18057	-17.5588	-12.4966	Canada's Michael Smith Genome Sciences Centre
s18080	7.23314	2.81385	Canada's Michael Smith Genome Sciences Centre
s18027	7.7544	7.52454	Canada's Michael Smith Genome Sciences Centre
s18053	-6.08489	9.14002	Canada's Michael Smith Genome Sciences Centre
s18026	-26.9364	11.853	Canada's Michael Smith Genome Sciences Centre
s18052	-12.8776	-2.90082	Canada's Michael Smith Genome Sciences Centre
s18030	-12.2645	0.330716	Canada's Michael Smith Genome Sciences Centre
s18075	-6.97018	5.94825	Canada's Michael Smith Genome Sciences Centre
s18041	4.4567	-8.04506	Canada's Michael Smith Genome Sciences Centre
s18023	-20.114	4.9316	Broad Institute of MIT and Harvard
s18031	-21.5904	9.86881	Canada's Michael Smith Genome Sciences Centre
s18061	25.4042	-10.7214	Baylor College of Medicine
s18033	3.25932	-2.30452	Canada's Michael Smith Genome Sciences Centre
s18034	23.6477	-5.84636	Baylor College of Medicine
s18070	-4.7907	19.591	Baylor College of Medicine
s18076	-7.17313	-0.329587	Canada's Michael Smith Genome Sciences Centre
s18045	5.35161	7.33397	Canada's Michael Smith Genome Sciences Centre
s18064	2.91698	-4.35403	Canada's Michael Smith Genome Sciences Centre
s18024	2.74159	4.92012	Canada's Michael Smith Genome Sciences Centre
s18073	-13.6875	-5.96035	Canada's Michael Smith Genome Sciences Centre
s18039	7.74421	-9.14459	Canada's Michael Smith Genome Sciences Centre
s18035	-2.72284	9.45265	Canada's Michael Smith Genome Sciences Centre
s18079	3.18916	-1.0618	Canada's Michael Smith Genome Sciences Centre
s18063	0.297764	-5.538	Canada's Michael Smith Genome Sciences Centre
s18020	-1.38056	-3.6273	Broad Institute of MIT and Harvard
s18069	13.8573	7.22305	Canada's Michael Smith Genome Sciences Centre
s18058	-0.0299138	1.22883	Canada's Michael Smith Genome Sciences Centre
s18028	-31.7131	14.4016	Canada's Michael Smith Genome Sciences Centre
s18072	-4.58094	4.66254	Canada's Michael Smith Genome Sciences Centre
s18068	1.48146	-0.00228316	Canada's Michael Smith Genome Sciences Centre
s18056	-6.13734	-7.81812	Canada's Michael Smith Genome Sciences Centre
s18038	-16.1042	-3.68282	Canada's Michael Smith Genome Sciences Centre
s18071	4.80966	9.19067	Canada's Michael Smith Genome Sciences Centre
s18047	3.44893	5.47436	Canada's Michael Smith Genome Sciences Centre
s18048	10.1722	-9.68023	Canada's Michael Smith Genome Sciences Centre
s18046	14.5919	-10.1525	Canada's Michael Smith Genome Sciences Centre
s18043	1.33863	9.21601	Canada's Michael Smith Genome Sciences Centre
s18036	35.1158	-5.93061	Baylor College of Medicine
s18060	1.24815	-11.9027	Canada's Michael Smith Genome Sciences Centre
s18042	-1.0346	-7.19117	Canada's Michael Smith Genome Sciences Centre
s18055	13.6516	0.435544	Baylor College of Medicine
s18032	-17.5515	7.1249	Canada's Michael Smith Genome Sciences Centre
s18065	1.02612	-4.49875	Canada's Michael Smith Genome Sciences Centre
s18149	13.5207	-2.34371	Canada's Michael Smith Genome Sciences Centre
s18147	-29.6963	0.0624845	Washington University School of Medicine
s18150	-37.1715	50.1438	Washington University School of Medicine
s18148	-6.34991	-9.1935	Canada's Michael Smith Genome Sciences Centre
s17182	10.9288	-1.93559	Canada's Michael Smith Genome Sciences Centre
s17196	12.1042	-6.06294	Baylor College of Medicine
s17197	-6.71977	-5.4904	Canada's Michael Smith Genome Sciences Centre
s17185	-14.2903	-3.80974	Canada's Michael Smith Genome Sciences Centre
s17170	-14.5398	10.6225	Baylor College of Medicine
s17178	3.3547	5.52062	Canada's Michael Smith Genome Sciences Centre
s17174	12.4335	6.01519	Canada's Michael Smith Genome Sciences Centre
s17183	-9.93862	6.72816	Canada's Michael Smith Genome Sciences Centre
s17176	-12.0636	9.24758	Canada's Michael Smith Genome Sciences Centre
s17202	12.4551	12.2485	Canada's Michael Smith Genome Sciences Centre
s17192	15.2597	-15.8279	Canada's Michael Smith Genome Sciences Centre
s17167	-23.4351	8.83977	Broad Institute of MIT and Harvard
s17189	-8.38564	-4.15052	Canada's Michael Smith Genome Sciences Centre
s17190	1.02197	-8.43126	Canada's Michael Smith Genome Sciences Centre
s17175	5.52976	2.05907	Baylor College of Medicine
s17180	3.93796	-3.33598	Baylor College of Medicine
s17194	-1.58528	-9.24687	Canada's Michael Smith Genome Sciences Centre
s17171	-7.0068	6.50345	Canada's Michael Smith Genome Sciences Centre
s17168	1.09153	-3.86863	Canada's Michael Smith Genome Sciences Centre
s17165	-17.5448	5.23467	Broad Institute of MIT and Harvard
s17191	-15.3953	8.91362	Baylor College of Medicine
s17173	23.484	23.0326	Canada's Michael Smith Genome Sciences Centre
s17188	-19.2124	3.93273	Canada's Michael Smith Genome Sciences Centre
s17201	-7.31525	-14.0608	Canada's Michael Smith Genome Sciences Centre
s17177	-5.11202	3.57211	Canada's Michael Smith Genome Sciences Centre
s17169	-0.891355	-4.1936	Canada's Michael Smith Genome Sciences Centre
s17187	-5.37161	-4.42366	Canada's Michael Smith Genome Sciences Centre
s17164	-58.6984	-7.42246	Broad Institute of MIT and Harvard
s17184	-8.26197	-2.87835	Canada's Michael Smith Genome Sciences Centre
s17186	-6.45014	4.21752	Canada's Michael Smith Genome Sciences Centre
s17199	20.763	-7.29377	Baylor College of Medicine
s17181	13.1773	-2.75801	Canada's Michael Smith Genome Sciences Centre
s17179	-0.156976	-15.556	Canada's Michael Smith Genome Sciences Centre
s17198	-2.2988	-2.68425	Canada's Michael Smith Genome Sciences Centre
s17193	17.1699	-9.23248	Baylor College of Medicine
s17200	7.42304	3.08527	Canada's Michael Smith Genome Sciences Centre
s17166	-6.53149	3.04141	Broad Institute of MIT and Harvard
s17195	-26.9134	7.23763	Baylor College of Medicine
s17384	2.44501	8.29012	Canada's Michael Smith Genome Sciences Centre
s17392	-12.3468	0.594595	Canada's Michael Smith Genome Sciences Centre
s17357	-0.04205	-11.6879	Canada's Michael Smith Genome Sciences Centre
s17360	-7.49936	8.79614	Canada's Michael Smith Genome Sciences Centre
s17388	-5.05134	-8.04149	Canada's Michael Smith Genome Sciences Centre
s17394	3.93481	5.98206	Canada's Michael Smith Genome Sciences Centre
s17376	2.92826	3.21039	Canada's Michael Smith Genome Sciences Centre
s17367	17.6994	-0.588381	Canada's Michael Smith Genome Sciences Centre
s17400	-2.46317	-7.80482	Canada's Michael Smith Genome Sciences Centre
s17373	-4.61893	4.65861	Canada's Michael Smith Genome Sciences Centre
s17391	-30.717	7.53828	Baylor College of Medicine
s17368	-20.1768	2.14486	Canada's Michael Smith Genome Sciences Centre
s17359	7.54465	14.2426	Canada's Michael Smith Genome Sciences Centre
s17397	-14.236	-3.42351	Canada's Michael Smith Genome Sciences Centre
s17358	1.19554	6.64179	Canada's Michael Smith Genome Sciences Centre
s17387	-22.6677	-4.37063	Canada's Michael Smith Genome Sciences Centre
s17365	10.4038	1.39269	Canada's Michael Smith Genome Sciences Centre
s17379	-11.4338	3.86633	Canada's Michael Smith Genome Sciences Centre
s17354	7.73407	16.0431	Canada's Michael Smith Genome Sciences Centre
s17386	10.8505	-0.770643	Canada's Michael Smith Genome Sciences Centre
s17362	2.17165	-14.2264	Canada's Michael Smith Genome Sciences Centre
s17395	15.9276	-2.12202	Baylor College of Medicine
s17401	4.74044	-1.39195	Canada's Michael Smith Genome Sciences Centre
s17348	-2.13017	-6.47996	Broad Institute of MIT and Harvard
s17366	-16.4772	-7.03356	Canada's Michael Smith Genome Sciences Centre
s17377	-2.71525	0.495568	Canada's Michael Smith Genome Sciences Centre
s17361	-7.60429	7.63247	Canada's Michael Smith Genome Sciences Centre
s17383	11.0752	3.41268	Canada's Michael Smith Genome Sciences Centre
s17385	-14.8388	1.64699	Canada's Michael Smith Genome Sciences Centre
s17382	-5.39674	-2.3338	Canada's Michael Smith Genome Sciences Centre
s17375	8.99082	-5.91628	Canada's Michael Smith Genome Sciences Centre
s17355	14.9316	-19.8121	Canada's Michael Smith Genome Sciences Centre
s17390	22.9831	-6.63531	Baylor College of Medicine
s17378	-14.6476	-0.567072	Canada's Michael Smith Genome Sciences Centre
s17389	12.0869	-7.04471	Baylor College of Medicine
s17371	-0.0563124	-5.62864	Canada's Michael Smith Genome Sciences Centre
s17372	14.8535	-11.6986	Canada's Michael Smith Genome Sciences Centre
s17369	-5.87281	10.9794	Canada's Michael Smith Genome Sciences Centre
s17404	4.19126	0.346522	Canada's Michael Smith Genome Sciences Centre
s17350	-7.55913	6.50496	Broad Institute of MIT and Harvard
s17352	20.14	11.612	Canada's Michael Smith Genome Sciences Centre
s17364	0.816214	2.07546	Canada's Michael Smith Genome Sciences Centre
s17403	-17.8354	-2.11734	Canada's Michael Smith Genome Sciences Centre
s17381	-2.35117	2.29502	Canada's Michael Smith Genome Sciences Centre
s17363	-14.6509	2.16987	Canada's Michael Smith Genome Sciences Centre
s17353	-6.29816	6.2233	Canada's Michael Smith Genome Sciences Centre
s17402	-5.81687	-0.593449	Canada's Michael Smith Genome Sciences Centre
s17380	-5.9717	-2.24109	Canada's Michael Smith Genome Sciences Centre
s17356	-15.7297	-4.97196	Canada's Michael Smith Genome Sciences Centre
s17398	9.41263	-0.863961	Canada's Michael Smith Genome Sciences Centre
s17349	-4.12998	2.08574	Broad Institute of MIT and Harvard
s17396	-8.2848	3.10096	Canada's Michael Smith Genome Sciences Centre
s17399	-23.3977	0.965136	Canada's Michael Smith Genome Sciences Centre
s17370	-4.31178	3.40894	Canada's Michael Smith Genome Sciences Centre
s17374	11.9531	5.10196	Canada's Michael Smith Genome Sciences Centre
s17393	10.9176	5.17199	Canada's Michael Smith Genome Sciences Centre
s17351	-30.7409	4.57157	Broad Institute of MIT and Harvard
s16790	-10.7344	-1.68155	Baylor College of Medicine
s16818	23.7713	-11.6429	University of North Carolina
s16804	26.0487	-7.1672	University of North Carolina
s16846	23.0186	6.93252	University of North Carolina
s16788	-14.3673	-2.18589	Baylor College of Medicine
s16825	16.0872	7.69917	University of North Carolina
s16806	25.595	-0.767149	University of North Carolina
s16773	7.14758	-4.50655	Baylor College of Medicine
s16785	9.93006	-0.632744	Baylor College of Medicine
s16791	-10.9948	9.92658	Baylor College of Medicine
s16841	6.53801	7.42809	University of North Carolina
s16779	-1.69104	-7.4733	Baylor College of Medicine
s16774	-3.71973	-8.96637	Baylor College of Medicine
s16840	21.5805	9.95963	University of North Carolina
s16826	2.7347	24.1127	University of North Carolina
s16811	0.0256656	-7.2476	University of North Carolina
s16815	11.7216	-8.13557	University of North Carolina
s16776	-18.8152	-0.848683	Baylor College of Medicine
s16795	6.28061	-3.07176	University of North Carolina
s16830	23.715	5.15604	University of North Carolina
s16798	-5.25678	2.61911	University of North Carolina
s16796	37.232	-13.6458	University of North Carolina
s16834	-10.9088	-9.9726	University of North Carolina
s16836	29.077	-8.38439	University of North Carolina
s16837	40.7134	-16.161	University of North Carolina
s16844	3.42463	-7.34	University of North Carolina
s16835	23.1548	14.442	University of North Carolina
s16783	-13.2666	3.16204	Baylor College of Medicine
s16821	3.18136	-0.560188	University of North Carolina
s16797	11.9159	13.2637	University of North Carolina
s16778	3.13475	-3.92169	Baylor College of Medicine
s16812	11.8686	-8.03298	University of North Carolina
s16813	5.80104	-11.1942	University of North Carolina
s16809	7.93021	-14.3818	University of North Carolina
s16823	16.1095	2.21229	University of North Carolina
s16789	-29.6517	33.6828	Baylor College of Medicine
s16827	9.9807	26.192	University of North Carolina
s16838	35.511	-10.681	University of North Carolina
s16845	16.1534	-12.1617	University of North Carolina
s16822	11.4939	-0.214839	University of North Carolina
s16780	0.79145	-6.13535	Baylor College of Medicine
s16805	19.4704	-2.38267	University of North Carolina
s16777	1.8953	-10.2903	Baylor College of Medicine
s16816	3.6453	-8.84155	University of North Carolina
s16781	-15.1385	0.905955	Baylor College of Medicine
s16800	11.018	-2.48706	University of North Carolina
s16829	7.82742	6.83999	University of North Carolina
s16828	12.7922	23.1077	University of North Carolina
s16810	1.6955	-4.86971	University of North Carolina
s16786	-10.2086	-3.68544	Baylor College of Medicine
s16801	7.04687	12.4026	University of North Carolina
s16843	30.3485	-16.761	University of North Carolina
s16807	14.3921	0.536406	University of North Carolina
s16803	13.5556	-4.87399	University of North Carolina
s16819	3.33878	-3.18631	University of North Carolina
s16793	11.7463	11.0863	University of North Carolina
s16794	21.2992	-5.35066	University of North Carolina
s16808	11.2544	-3.19023	University of North Carolina
s16784	-22.0804	22.1684	Baylor College of Medicine
s16820	16.5927	4.06509	University of North Carolina
s16831	7.35962	11.219	University of North Carolina
s16799	-9.07985	-1.42798	University of North Carolina
s16842	23.8282	-2.28464	University of North Carolina
s16782	4.81255	-4.52321	Baylor College of Medicine
s16839	22.1834	24.7464	University of North Carolina
s16832	3.44509	4.38848	University of North Carolina
s16833	-11.5784	5.90956	University of North Carolina
s16787	-3.86784	3.3098	Baylor College of Medicine
s16824	-12.2006	9.59674	University of North Carolina
s16814	17.1995	-8.09122	University of North Carolina
s16802	18.4365	-2.16339	University of North Carolina
s16775	1.74562	-9.10732	Baylor College of Medicine
s16792	-3.8103	-10.3684	University of North Carolina
s16817	20.5715	-12.8935	University of North Carolina
s16772	-8.23055	-3.34073	Baylor College of Medicine
s16933	9.73094	7.44044	University of North Carolina
s16963	19.3415	-16.5937	University of North Carolina
s16924	21.5567	-11.3017	University of North Carolina
s16858	2.61886	-9.42876	Baylor College of Medicine
s16889	2.37362	-0.820907	University of North Carolina
s16932	1.85793	18.2859	University of North Carolina
s16860	14.8789	-5.21464	Baylor College of Medicine
s16923	6.98116	9.08857	University of North Carolina
s16958	26.0888	-1.00819	University of North Carolina
s16946	15.5964	-5.44892	University of North Carolina
s16894	-6.53928	-0.994362	University of North Carolina
s16918	4.358	15.9324	University of North Carolina
s16929	19.8043	8.84314	University of North Carolina
s16969	6.70085	2.99997	University of North Carolina
s16848	-29.0389	22.9773	Baylor College of Medicine
s16906	-0.40647	-5.4978	University of North Carolina
s16899	18.5883	-9.93065	University of North Carolina
s16877	23.0586	-2.90997	University of North Carolina
s16902	22.7725	-2.34676	University of North Carolina
s16870	7.67358	-5.71043	University of North Carolina
s16920	6.30164	-1.718	University of North Carolina
s16966	0.466105	-4.9807	University of North Carolina
s16917	11.7359	-2.81635	University of North Carolina
s16919	3.46937	11.8805	University of North Carolina
s16930	14.4366	18.7064	University of North Carolina
s16941	14.9905	-2.47555	University of North Carolina
s16849	5.06476	-7.57929	Baylor College of Medicine
s16868	-8.33634	4.2005	University of North Carolina
s16862	8.35978	-3.75055	Baylor College of Medicine
s16879	4.19849	-0.421236	University of North Carolina
s16900	19.992	-17.9776	University of North Carolina
s16953	0.655385	-6.96397	University of North Carolina
s16910	15.1263	-13.635	University of North Carolina
s16943	-8.06219	1.37381	University of North Carolina
s16922	14.4261	-2.79216	University of North Carolina
s16874	36.4127	-1.69708	University of North Carolina
s16957	7.43952	2.43964	University of North Carolina
s16850	-7.14758	-5.07203	Baylor College of Medicine
s16925	13.1218	-7.17618	University of North Carolina
s16961	21.2472	-2.53408	University of North Carolina
s16876	11.9786	-1.60992	University of North Carolina
s16875	4.23415	5.11207	University of North Carolina
s16904	27.7006	-3.89312	University of North Carolina
s16869	5.37263	10.0775	University of North Carolina
s16856	-18.7199	10.0492	Baylor College of Medicine
s16926	18.2494	9.78307	University of North Carolina
s16881	-9.34871	-9.63836	University of North Carolina
s16954	16.7752	-3.79827	University of North Carolina
s16891	-5.53248	-6.3757	University of North Carolina
s16967	12.4259	-3.25101	University of North Carolina
s16857	-20.0399	3.59068	Baylor College of Medicine
s16892	14.3373	-8.736	University of North Carolina
s16915	0.749272	-9.65462	University of North Carolina
s16942	-4.25568	-1.43822	University of North Carolina
s16937	15.8881	-5.49828	University of North Carolina
s16935	-4.34989	-3.73763	University of North Carolina
s16903	-19.8565	41.8558	University of North Carolina
s16962	19.8999	3.10804	University of North Carolina
s16847	-0.110103	-3.18946	Baylor College of Medicine
s16880	-12.6914	-10.2775	University of North Carolina
s16912	-10.747	2.74631	University of North Carolina
s16893	9.85746	-10.3833	University of North Carolina
s16944	6.04652	-2.98237	University of North Carolina
s16863	-1.89112	-10.3555	Baylor College of Medicine
s16940	1.21369	-3.7499	University of North Carolina
s16964	24.0706	-8.29171	University of North Carolina
s16901	13.175	2.06819	University of North Carolina
s16965	-0.118341	24.7848	University of North Carolina
s16897	6.41554	-9.50522	University of North Carolina
s16855	-18.1568	7.06753	Baylor College of Medicine
s16871	-10.3627	0.207606	University of North Carolina
s16872	-3.539	6.53664	University of North Carolina
s16951	-19.1016	8.36703	University of North Carolina
s16852	-17.4067	-0.660044	Baylor College of Medicine
s16865	-31.0227	25.2037	Baylor College of Medicine
s16886	-2.86226	1.47169	University of North Carolina
s16948	32.5707	4.31442	University of North Carolina
s16907	5.74658	18.9076	University of North Carolina
s16959	15.0088	1.14478	University of North Carolina
s16960	15.8408	-5.92565	University of North Carolina
s16864	-4.08888	2.86927	Baylor College of Medicine
s16945	21.2612	-11.4088	University of North Carolina
s16861	-22.2946	21.7931	Baylor College of Medicine
s16887	3.30199	8.02152	University of North Carolina
s16949	32.7724	-8.14615	University of North Carolina
s16908	13.9497	-5.99212	University of North Carolina
s16905	26.6184	1.40911	University of North Carolina
s16955	14.0177	-1.4041	University of North Carolina
s16890	22.0309	5.93639	University of North Carolina
s16867	11.4827	-2.87048	University of North Carolina
s16928	23.519	25.2115	University of North Carolina
s16888	8.22909	-6.65645	University of North Carolina
s16898	16.7679	-16.148	University of North Carolina
s16916	26.6057	-18.6165	University of North Carolina
s16884	3.69948	-7.65348	University of North Carolina
s16896	7.69843	-2.66189	University of North Carolina
s16956	18.5642	-8.32097	University of North Carolina
s16853	10.098	2.80492	Baylor College of Medicine
s16950	13.1412	-3.58251	University of North Carolina
s16909	16.3468	-4.79518	University of North Carolina
s16927	-8.04438	6.53298	University of North Carolina
s16885	-0.852619	0.573205	University of North Carolina
s16914	2.07992	-13.2876	University of North Carolina
s16859	0.294829	-4.54532	Baylor College of Medicine
s16873	19.4661	-7.78951	University of North Carolina
s16952	6.39197	-2.35432	University of North Carolina
s16866	12.2822	-3.13425	University of North Carolina
s16936	27.4409	-9.57378	University of North Carolina
s16913	11.2644	-9.90628	University of North Carolina
s16939	4.96861	-10.4836	University of North Carolina
s16911	3.64733	-13.6884	University of North Carolina
s16854	-16.1742	1.07469	Baylor College of Medicine
s16968	12.7576	10.4894	University of North Carolina
s16883	22.4074	-4.67239	University of North Carolina
s16931	9.25553	7.04614	University of North Carolina
s16878	4.4832	4.03035	University of North Carolina
s16882	24.6836	-5.41369	University of North Carolina
s16851	-4.76598	-3.55189	Baylor College of Medicine
s16947	27.7368	-6.61674	University of North Carolina
s16895	-9.82284	0.369997	University of North Carolina
s16655	28.3675	-8.49425	University of North Carolina
s16636	7.47295	-3.11403	University of North Carolina
s16584	0.562099	-4.16755	Baylor College of Medicine
s16635	3.93664	13.5992	University of North Carolina
s16657	24.2518	2.06052	University of North Carolina
s16622	-6.78133	22.154	University of North Carolina
s16644	10.2524	-0.52029	University of North Carolina
s16593	-3.41972	1.48613	Baylor College of Medicine
s16625	20.0784	10.4479	University of North Carolina
s16606	13.3852	9.08901	University of North Carolina
s16640	11.3362	6.00218	University of North Carolina
s16628	-3.03303	-5.18461	University of North Carolina
s16633	4.49021	-18.7413	University of North Carolina
s16596	2.71242	-4.46561	Baylor College of Medicine
s16602	-4.64442	11.7655	University of North Carolina
s16592	-8.9479	1.76734	Baylor College of Medicine
s16634	22.0953	-10.6868	University of North Carolina
s16667	44.1183	-16.2451	University of North Carolina
s16654	32.3455	-12.6509	University of North Carolina
s16639	11.2849	19.4022	University of North Carolina
s16641	4.73087	15.0611	University of North Carolina
s16601	-10.2881	7.12514	University of North Carolina
s16630	-1.97173	-8.90804	University of North Carolina
s16669	28.715	-16.3554	University of North Carolina
s16580	-12.6117	2.26821	Baylor College of Medicine
s16666	17.6048	16.9064	University of North Carolina
s16645	9.72393	3.55401	University of North Carolina
s16620	17.4349	2.3053	University of North Carolina
s16618	8.5652	5.01939	University of North Carolina
s16586	-16.3503	1.05656	Baylor College of Medicine
s16587	6.95333	0.515543	Baylor College of Medicine
s16608	-8.96933	-2.76133	University of North Carolina
s16627	25.0489	-16.2325	University of North Carolina
s16595	2.27234	-6.94997	Baylor College of Medicine
s16638	9.73037	7.96132	University of North Carolina
s16632	18.7218	-9.62265	University of North Carolina
s16664	12.1702	-1.15479	University of North Carolina
s16653	6.66738	0.498572	University of North Carolina
s16591	-7.72777	-1.04745	Baylor College of Medicine
s16615	30.926	0.630855	University of North Carolina
s16623	28.9408	-0.902863	University of North Carolina
s16612	1.61387	8.32695	University of North Carolina
s16585	-13.8705	-2.15092	Baylor College of Medicine
s16611	7.42262	8.32912	University of North Carolina
s16647	5.21625	-2.88246	University of North Carolina
s16651	16.436	-11.472	University of North Carolina
s16590	9.3351	-2.75484	Baylor College of Medicine
s16650	8.43418	-10.3285	University of North Carolina
s16619	5.08435	-6.67867	University of North Carolina
s16642	8.65131	12.5297	University of North Carolina
s16600	-7.51844	6.72342	University of North Carolina
s16665	11.2004	-4.11337	University of North Carolina
s16610	9.57495	0.586003	University of North Carolina
s16629	3.53244	-10.4685	University of North Carolina
s16663	5.51448	7.47271	University of North Carolina
s16617	23.8476	-4.79238	University of North Carolina
s16659	3.51106	-8.01308	University of North Carolina
s16597	1.55906	-6.29107	Baylor College of Medicine
s16649	10.8819	9.215	University of North Carolina
s16599	22.431	-6.24887	University of North Carolina
s16631	9.22206	-11.9787	University of North Carolina
s16607	-21.4601	13.4583	University of North Carolina
s16660	-0.871913	7.05563	University of North Carolina
s16668	7.32643	-9.01561	University of North Carolina
s16616	9.49175	-3.09594	University of North Carolina
s16609	10.636	1.54316	University of North Carolina
s16583	6.06538	-9.27068	Baylor College of Medicine
s16621	20.3734	-8.74398	University of North Carolina
s16605	24.8633	-14.0739	University of North Carolina
s16582	-7.89934	-3.31332	Baylor College of Medicine
s16658	27.7871	-5.61019	University of North Carolina
s16589	-11.3064	0.605476	Baylor College of Medicine
s16662	23.0374	-6.4637	University of North Carolina
s16614	26.6099	-0.525336	University of North Carolina
s16598	-6.14271	7.83053	Baylor College of Medicine
s16643	15.6252	8.07353	University of North Carolina
s16588	-37.3751	26.2535	Baylor College of Medicine
s16637	7.02975	5.9752	University of North Carolina
s16594	6.80152	-0.0329435	Baylor College of Medicine
s16613	17.3508	-3.90076	University of North Carolina
s16652	-9.92055	-9.78375	University of North Carolina
s16581	-4.04716	0.951233	Baylor College of Medicine
s16661	-8.96475	12.2979	University of North Carolina
s16603	20.4024	-0.331405	University of North Carolina
s16648	9.67444	-12.9663	University of North Carolina
s16624	12.2891	-1.26874	University of North Carolina
s16626	13.9273	-3.50305	University of North Carolina
s16604	14.1578	-17.3794	University of North Carolina
s16656	30.9317	-8.35567	University of North Carolina
s16771	-7.42677	17.7336	University of North Carolina
s16700	20.2065	-0.761657	University of North Carolina
s16687	9.36001	-7.89963	Baylor College of Medicine
s16704	7.22548	-4.73015	University of North Carolina
s16753	-0.788506	16.4017	University of North Carolina
s16763	-2.13327	-5.06876	University of North Carolina
s16766	27.5989	3.35525	University of North Carolina
s16702	-8.43632	10.4957	University of North Carolina
s16672	-8.36759	-4.19593	Baylor College of Medicine
s16729	19.6218	-8.97871	University of North Carolina
s16767	22.8257	-2.5031	University of North Carolina
s16743	-8.4505	10.4578	University of North Carolina
s16705	-0.913789	3.34014	University of North Carolina
s16693	6.19646	-1.07994	University of North Carolina
s16681	16.0981	-2.73361	Baylor College of Medicine
s16757	39.3195	-10.5837	University of North Carolina
s16726	17.5115	-13.6591	University of North Carolina
s16751	4.96788	7.52509	University of North Carolina
s16711	-3.1608	2.08057	University of North Carolina
s16674	2.88918	-3.94563	Baylor College of Medicine
s16734	29.2391	-13.7884	University of North Carolina
s16765	21.2383	-0.810597	University of North Carolina
s16699	26.7492	-12.0035	University of North Carolina
s16761	23.0415	-5.74416	University of North Carolina
s16739	19.7032	-1.84539	University of North Carolina
s16762	6.20111	-6.29506	University of North Carolina
s16703	0.152759	0.720998	University of North Carolina
s16724	6.5981	-7.13109	University of North Carolina
s16732	31.0231	-5.02591	University of North Carolina
s16675	-12.3457	-0.834757	Baylor College of Medicine
s16748	12.0022	8.65598	University of North Carolina
s16738	-7.56306	-0.421829	University of North Carolina
s16717	10.5079	-16.7412	University of North Carolina
s16727	8.68678	-8.46707	University of North Carolina
s16770	17.5999	-15.2491	University of North Carolina
s16737	-14.7652	7.74231	University of North Carolina
s16696	13.6293	8.52443	University of North Carolina
s16756	8.22291	-8.05552	University of North Carolina
s16746	5.38668	20.8373	University of North Carolina
s16712	15.926	-6.45408	University of North Carolina
s16670	-8.01623	-0.196805	Baylor College of Medicine
s16714	3.19598	-3.32771	University of North Carolina
s16733	23.6217	-9.28723	University of North Carolina
s16676	-5.70584	2.91706	Baylor College of Medicine
s16760	20.1213	-7.06059	University of North Carolina
s16677	5.92512	-6.8014	Baylor College of Medicine
s16716	13.6214	-0.558615	University of North Carolina
s16745	14.3996	11.4702	University of North Carolina
s16685	-16.7472	24.8807	Baylor College of Medicine
s16749	13.6114	0.281708	University of North Carolina
s16683	9.97311	-9.0879	Baylor College of Medicine
s16758	32.7328	-3.45921	University of North Carolina
s16754	-3.08919	7.93103	University of North Carolina
s16688	-9.60617	-3.06528	Baylor College of Medicine
s16671	1.95152	-8.63474	Baylor College of Medicine
s16718	23.8357	5.96739	University of North Carolina
s16698	35.2165	-18.8864	University of North Carolina
s16694	7.06817	-3.12884	University of North Carolina
s16713	-6.20739	-8.32409	University of North Carolina
s16701	0.782703	13.7694	University of North Carolina
s16755	14.9021	7.12547	University of North Carolina
s16750	4.47131	8.68748	University of North Carolina
s16686	-18.0908	-4.96756	Baylor College of Medicine
s16723	15.2281	-15.9083	University of North Carolina
s16720	27.7901	18.8204	University of North Carolina
s16769	20.0114	2.26729	University of North Carolina
s16679	0.234214	-1.40766	Baylor College of Medicine
s16689	-4.73363	5.14567	Baylor College of Medicine
s16697	35.212	-10.7261	University of North Carolina
s16742	6.7847	17.1188	University of North Carolina
s16678	0.314572	-7.76272	Baylor College of Medicine
s16690	-18.1232	-3.21542	Baylor College of Medicine
s16709	-1.53525	-1.58948	University of North Carolina
s16735	16.8127	-1.79429	University of North Carolina
s16740	22.8952	1.67346	University of North Carolina
s16719	16.7433	-5.09619	University of North Carolina
s16684	12.1851	-1.57865	Baylor College of Medicine
s16715	18.9111	-4.59809	University of North Carolina
s16706	-2.64994	-7.55948	University of North Carolina
s16710	-0.233237	-4.09049	University of North Carolina
s16768	6.46263	-3.25724	University of North Carolina
s16752	2.58158	4.56373	University of North Carolina
s16725	31.7995	-12.1111	University of North Carolina
s16691	-4.6168	-3.45504	University of North Carolina
s16764	16.4495	9.8907	University of North Carolina
s16722	6.1307	8.59752	University of North Carolina
s16728	16.5951	-12.3705	University of North Carolina
s16695	-0.527671	-0.139256	University of North Carolina
s16736	23.0193	-11.1285	University of North Carolina
s16682	-26.7703	23.4098	Baylor College of Medicine
s16673	-1.42569	-1.67753	Baylor College of Medicine
s16721	7.12953	28.6573	University of North Carolina
s16680	1.23732	-10.3553	Baylor College of Medicine
s16692	17.1628	-3.33258	University of North Carolina
s16708	28.8159	4.7262	University of North Carolina
s16744	-8.97348	16.0088	University of North Carolina
s16759	30.3325	-11.3872	University of North Carolina
s16741	-0.215382	-8.47566	University of North Carolina
s16707	-0.540551	-0.927465	University of North Carolina
s16971	-12.6948	6.27823	Baylor College of Medicine
s17012	1.69019	-7.75874	University of North Carolina
s17035	32.9524	-18.8606	University of North Carolina
s17041	18.0459	-2.93742	University of North Carolina
s16977	-23.1965	-1.76616	Baylor College of Medicine
s17006	28.9977	4.99117	University of North Carolina
s17033	19.7596	-10.3159	University of North Carolina
s17004	-3.41595	5.67661	University of North Carolina
s16982	-7.86598	-2.69653	Baylor College of Medicine
s17001	1.07677	-10.2771	University of North Carolina
s16985	9.62379	-0.326275	Baylor College of Medicine
s16999	6.95194	2.88882	University of North Carolina
s17000	-1.32202	-6.28035	University of North Carolina
s17019	21.1087	-10.1307	University of North Carolina
s17011	10.2025	5.9965	University of North Carolina
s17005	19.2169	-0.199201	University of North Carolina
s17029	13.9929	10.9651	University of North Carolina
s16984	-15.077	-0.142227	Baylor College of Medicine
s17025	-2.86306	2.43336	University of North Carolina
s16988	-8.43108	0.61087	Baylor College of Medicine
s17047	36.7898	-0.172158	University of North Carolina
s16970	4.66205	-5.449	Baylor College of Medicine
s16997	0.607287	-4.25752	University of North Carolina
s17034	11.6448	-3.85523	University of North Carolina
s16989	-12.8654	2.99686	University of North Carolina
s16979	-2.23839	7.44506	Baylor College of Medicine
s17018	12.5784	1.60112	University of North Carolina
s17050	46.9204	-3.57485	University of North Carolina
s17055	4.92858	-1.36779	University of North Carolina
s17010	-2.85	-2.43294	University of North Carolina
s17020	32.0162	-8.13894	University of North Carolina
s17046	25.685	-12.1426	University of North Carolina
s16981	10.4087	-3.98104	Baylor College of Medicine
s16980	-12.609	6.16277	Baylor College of Medicine
s17049	17.8485	-5.56441	University of North Carolina
s16975	-22.2832	4.35132	Baylor College of Medicine
s16992	0.381682	19.2261	University of North Carolina
s17051	9.71461	8.91485	University of North Carolina
s16983	-11.8611	0.945826	Baylor College of Medicine
s17030	3.04546	-1.67789	University of North Carolina
s17028	13.6851	6.64462	University of North Carolina
s16993	-23.0458	1.65657	University of North Carolina
s16990	1.29129	3.88485	University of North Carolina
s16996	9.55329	-1.26819	University of North Carolina
s17052	7.57205	11.714	University of North Carolina
s16998	-2.43604	2.45825	University of North Carolina
s17027	3.35056	3.47876	University of North Carolina
s17013	15.6838	4.8961	University of North Carolina
s16976	-15.336	5.54313	Baylor College of Medicine
s17048	15.7171	7.69085	University of North Carolina
s17053	13.501	2.51053	University of North Carolina
s17008	9.66409	11.1994	University of North Carolina
s16973	6.72474	-12.0076	Baylor College of Medicine
s17003	3.69361	-8.29801	University of North Carolina
s17038	-0.0788834	4.4383	University of North Carolina
s16994	-1.41836	-1.34901	University of North Carolina
s17054	27.9986	-5.47034	University of North Carolina
s17032	11.0619	3.57255	University of North Carolina
s17009	3.4454	2.25972	University of North Carolina
s17014	1.61632	-15.3759	University of North Carolina
s17045	30.0921	-9.6601	University of North Carolina
s17036	7.62721	-7.62074	University of North Carolina
s17026	7.06968	22.9195	University of North Carolina
s17031	3.6652	2.53276	University of North Carolina
s17015	-3.48064	1.88345	University of North Carolina
s17024	8.71123	13.0965	University of North Carolina
s17042	-0.548551	0.0216219	University of North Carolina
s17023	8.54298	-1.08596	University of North Carolina
s17017	11.322	-19.6343	University of North Carolina
s16986	-35.6124	32.9049	Baylor College of Medicine
s16995	-4.11997	-3.5785	University of North Carolina
s17022	6.59299	19.7314	University of North Carolina
s17002	9.92236	-3.23446	University of North Carolina
s17016	2.26722	-1.74278	University of North Carolina
s17040	6.57975	2.75216	University of North Carolina
s17037	7.57922	4.20385	University of North Carolina
s16974	-3.93142	-10.9797	Baylor College of Medicine
s17007	12.3438	-1.75839	University of North Carolina
s16987	11.3287	-10.1428	Baylor College of Medicine
s17044	20.0578	-9.89099	University of North Carolina
s16991	37.0473	-17.8634	University of North Carolina
s16972	-22.0338	12.2623	Baylor College of Medicine
s17043	21.7335	-13.0098	University of North Carolina
s17021	-1.74676	5.88778	University of North Carolina
s16978	-16.1755	2.23598	Baylor College of Medicine
s17111	-5.84334	2.26026	University of North Carolina
s17091	13.2772	12.1822	University of North Carolina
s17095	21.8419	-4.87251	University of North Carolina
s17076	-11.8093	7.22134	University of North Carolina
s17075	-3.77875	-4.48646	University of North Carolina
s17106	17.4407	-4.10697	University of North Carolina
s17081	9.77566	-13.2333	University of North Carolina
s17085	20.0928	-9.14822	University of North Carolina
s17093	5.74007	11.3858	University of North Carolina
s17058	3.70359	-2.89258	Baylor College of Medicine
s17096	1.82883	-4.07522	University of North Carolina
s17080	23.6386	-7.97944	University of North Carolina
s17104	8.27449	5.8418	University of North Carolina
s17064	-38.1747	25.2594	Baylor College of Medicine
s17071	4.52741	9.69731	University of North Carolina
s17062	12.0006	-2.42345	Baylor College of Medicine
s17074	0.552239	-8.96608	University of North Carolina
s17102	4.29912	30.9879	University of North Carolina
s17068	17.0482	-13.1606	University of North Carolina
s17101	22.3217	-9.48791	University of North Carolina
s17097	5.93919	10.0444	University of North Carolina
s17086	3.6081	-10.2242	University of North Carolina
s17066	-1.72298	2.54134	University of North Carolina
s17100	13.7589	9.98459	University of North Carolina
s17099	17.7246	-1.95808	University of North Carolina
s17082	-7.79966	-2.90622	University of North Carolina
s17060	5.33659	-7.53766	Baylor College of Medicine
s17079	9.28015	-6.4689	University of North Carolina
s17072	8.94546	-3.51843	University of North Carolina
s17088	7.1554	-1.84751	University of North Carolina
s17070	27.2996	-10.9044	University of North Carolina
s17098	5.52602	2.26867	University of North Carolina
s17067	6.50662	15.1037	University of North Carolina
s17090	3.87738	-6.33406	University of North Carolina
s17103	18.6677	-2.4772	University of North Carolina
s17108	20.3836	-6.0349	University of North Carolina
s17078	19.2163	1.7468	University of North Carolina
s17105	20.3413	-6.9348	University of North Carolina
s17092	8.61983	21.4638	University of North Carolina
s17069	43.8668	-18.2936	University of North Carolina
s17094	20.9424	0.758368	University of North Carolina
s17073	22.151	3.3097	University of North Carolina
s17109	25.1048	-4.68238	University of North Carolina
s17110	26.0947	-2.44807	University of North Carolina
s17084	-9.93649	-3.04608	University of North Carolina
s17065	12.7259	-4.61321	Baylor College of Medicine
s17089	9.18425	-8.49643	University of North Carolina
s17107	14.3485	-6.063	University of North Carolina
s17056	0.0470882	-7.84754	Baylor College of Medicine
s17061	5.36262	-2.8511	Baylor College of Medicine
s17059	-16.7015	2.59985	Baylor College of Medicine
s17077	10.9256	1.76136	University of North Carolina
s17057	-11.3067	0.602983	Baylor College of Medicine
s17083	3.08617	-6.08297	University of North Carolina
s17063	10.9934	-6.30561	Baylor College of Medicine
s15697	4.49347	-11.8529	University of North Carolina
s15624	-2.89116	3.30532	Harvard Medical School
s15741	-5.51951	0.643003	University of North Carolina
s15623	-24.902	6.20334	Harvard Medical School
s15629	7.71167	2.98215	Harvard Medical School
s15725	18.8141	16.5148	University of North Carolina
s15712	12.0994	-9.70378	University of North Carolina
s15731	6.14659	12.9238	University of North Carolina
s15678	10.0604	-8.97893	University of North Carolina
s15677	11.6335	-9.52904	University of North Carolina
s15604	20.7489	11.6324	Broad Institute of MIT and Harvard
s15679	-0.774719	-7.5875	University of North Carolina
s15664	-0.857139	-2.87691	University of North Carolina
s15613	-0.890667	-1.98463	Harvard Medical School
s15676	9.46467	-6.56713	University of North Carolina
s15682	5.36281	-6.12235	University of North Carolina
s15642	-6.30689	6.00851	Harvard Medical School
s15724	18.0223	0.193011	University of North Carolina
s15655	0.647292	-5.25226	Harvard Medical School
s15609	-0.213359	1.18987	Harvard Medical School
s15693	-3.31171	-1.46291	University of North Carolina
s15680	-3.88249	-6.83191	University of North Carolina
s15730	-8.18444	-2.70127	University of North Carolina
s15611	-3.17757	-2.46036	Harvard Medical School
s15652	10.5876	-8.76573	MD Anderson - Institute for Applied Cancer Science
s15632	-6.14112	6.99343	Harvard Medical School
s15661	14.5605	-14.8918	University of North Carolina
s15729	-6.8172	5.66959	University of North Carolina
s15648	43.2437	-22.531	Baylor College of Medicine
s15665	-12.669	-1.90755	University of North Carolina
s15615	-26.5488	25.1859	Baylor College of Medicine
s15736	-5.76058	4.48436	University of North Carolina
s15616	-11.0055	7.85034	Harvard Medical School
s15626	-4.16908	-7.10807	Harvard Medical School
s15640	8.64653	3.36505	Harvard Medical School
s15713	15.2467	-11.046	University of North Carolina
s15603	13.4187	-5.70791	Broad Institute of MIT and Harvard
s15737	3.86379	-5.86924	University of North Carolina
s15622	-23.3532	4.11794	Harvard Medical School
s15708	12.1576	-4.17419	University of North Carolina
s15705	14.7828	3.66447	University of North Carolina
s15621	-23.0536	6.12391	Harvard Medical School
s15732	-9.67167	7.78149	University of North Carolina
s15639	-10.3037	10.991	Baylor College of Medicine
s15644	-17.5582	9.5844	MD Anderson - Institute for Applied Cancer Science
s15637	-8.13888	-0.750068	MD Anderson - Institute for Applied Cancer Science
s15733	6.702	7.47701	University of North Carolina
s15688	5.56069	-5.22226	University of North Carolina
s15706	4.1559	0.425565	University of North Carolina
s15643	12.3458	-11.7224	Baylor College of Medicine
s15650	-22.2766	-7.76822	Harvard Medical School
s15681	-13.3666	2.44913	University of North Carolina
s15704	5.44122	-3.16957	University of North Carolina
s15735	-0.0706814	20.2869	University of North Carolina
s15635	-12.4273	7.82047	Baylor College of Medicine
s15653	-9.61041	20.649	Harvard Medical School
s15657	0.817993	1.4394	Baylor College of Medicine
s15602	28.6931	8.53104	Broad Institute of MIT and Harvard
s15620	13.1627	-8.7637	Harvard Medical School
s15656	-12.288	16.4643	Harvard Medical School
s15673	20.3848	-10.7651	University of North Carolina
s15668	10.3428	-10.1033	University of North Carolina
s15718	3.31903	-0.723117	University of North Carolina
s15610	2.03193	9.91127	Harvard Medical School
s15641	12.6088	-8.38159	Harvard Medical School
s15646	31.9321	6.2384	Baylor College of Medicine
s15674	1.34617	8.73015	University of North Carolina
s15690	-12.1576	1.12109	University of North Carolina
s15714	-12.9669	-2.26471	University of North Carolina
s15719	-4.20222	-7.39743	University of North Carolina
s15685	-20.7239	2.18176	University of North Carolina
s15649	34.4199	11.912	Baylor College of Medicine
s15625	-3.52258	4.81172	Harvard Medical School
s15739	-2.18447	-0.113716	University of North Carolina
s15617	10.0406	-3.88256	Harvard Medical School
s15614	10.1609	-4.62508	Baylor College of Medicine
s15703	-4.61167	-12.6101	University of North Carolina
s15630	-18.538	7.77321	Harvard Medical School
s15618	5.44865	-3.03284	Harvard Medical School
s15695	2.40293	-1.73349	University of North Carolina
s15689	7.8524	-4.56924	University of North Carolina
s15645	36.6527	-10.8483	Harvard Medical School
s15721	2.29885	-9.62407	University of North Carolina
s15619	-23.2787	1.54384	Harvard Medical School
s15675	-5.15694	-2.29332	University of North Carolina
s15669	8.95078	-1.71368	University of North Carolina
s15605	3.45971	2.13193	Broad Institute of MIT and Harvard
s15663	4.0125	-10.925	University of North Carolina
s15696	9.06679	-3.60869	University of North Carolina
s15651	3.04793	14.1132	MD Anderson - Institute for Applied Cancer Science
s15715	0.681289	-5.94115	University of North Carolina
s15699	7.12609	-10.5218	University of North Carolina
s15720	0.467556	-0.376712	University of North Carolina
s15700	-6.84033	-4.97808	University of North Carolina
s15707	0.692785	-3.1938	University of North Carolina
s15631	-20.4846	2.52411	Harvard Medical School
s15660	15.9007	-13.1067	University of North Carolina
s15727	6.18847	4.07028	University of North Carolina
s15686	9.09399	-5.84803	University of North Carolina
s15723	-4.72382	-3.04987	University of North Carolina
s15633	-15.4777	4.63217	Harvard Medical School
s15734	0.76719	4.86145	University of North Carolina
s15628	-8.44463	-1.2244	Harvard Medical School
s15684	14.3041	-5.86428	University of North Carolina
s15671	5.63883	-1.35725	University of North Carolina
s15634	-13.4319	6.04201	Baylor College of Medicine
s15701	-2.64188	23.7043	University of North Carolina
s15607	8.85915	-11.3268	Broad Institute of MIT and Harvard
s15709	30.419	-8.67364	University of North Carolina
s15636	4.03807	3.90862	Baylor College of Medicine
s15726	19.57	-2.70419	University of North Carolina
s15702	-12.4147	4.59122	University of North Carolina
s15710	0.652752	-0.495406	University of North Carolina
s15740	6.6506	-0.513181	University of North Carolina
s15683	-1.11309	-11.4796	University of North Carolina
s15662	0.687508	-11.877	University of North Carolina
s15627	-4.74819	8.08775	Baylor College of Medicine
s15659	4.09907	0.0947741	University of North Carolina
s15608	7.59776	-4.22211	Harvard Medical School
s15711	3.19164	-7.50942	University of North Carolina
s15647	-1.50427	-3.71953	Harvard Medical School
s15717	5.32964	-9.99971	University of North Carolina
s15698	21.7087	-10.9705	University of North Carolina
s15694	22.5265	-14.0114	University of North Carolina
s15716	19.4745	-5.28481	University of North Carolina
s15670	30.0892	-13.723	University of North Carolina
s15691	33.6937	28.7267	University of North Carolina
s15654	-8.69905	22.8497	Harvard Medical School
s15612	-5.85507	3.40188	Harvard Medical School
s15728	-18.3117	1.8119	University of North Carolina
s15658	7.22466	-12.1395	University of North Carolina
s15638	9.76989	2.56745	Harvard Medical School
s15722	4.02509	-8.81142	University of North Carolina
s15666	7.30897	-9.04173	University of North Carolina
s15667	-1.65481	-15.5639	University of North Carolina
s15738	9.57164	-4.65595	University of North Carolina
s15687	9.87814	-11.3328	University of North Carolina
s15692	-6.19008	3.18918	University of North Carolina
s15606	-17.847	6.13406	Broad Institute of MIT and Harvard
s15672	-8.14689	-1.19084	University of North Carolina
s16230	10.7739	-5.39861	University of North Carolina
s16229	1.00752	-2.61434	University of North Carolina
s16209	3.20544	0.4259	MD Anderson - Institute for Applied Cancer Science
s16240	-10.9199	-6.27152	University of North Carolina
s16296	-15.7792	11.3187	University of North Carolina
s16231	-12.4465	-0.436853	University of North Carolina
s16217	-21.8044	-1.75261	University of North Carolina
s16249	11.5855	-16.8939	University of North Carolina
s16166	7.93687	-0.533464	Broad Institute of MIT and Harvard
s16215	1.36689	0.740515	University of North Carolina
s16238	28.8241	-12.0162	University of North Carolina
s16263	17.1322	-6.49565	University of North Carolina
s16295	6.22828	13.0513	University of North Carolina
s16218	-15.3354	-5.18539	University of North Carolina
s16197	-5.97323	-2.61735	Harvard Medical School
s16308	25.9782	-5.25296	University of North Carolina
s16202	-28.9675	4.0098	Harvard Medical School
s16183	-22.5058	6.68446	Harvard Medical School
s16174	12.8088	-2.50367	Harvard Medical School
s16190	-29.775	6.44956	Harvard Medical School
s16300	-0.111804	18.6384	University of North Carolina
s16267	-2.39653	1.87657	University of North Carolina
s16216	-10.8315	-11.6867	University of North Carolina
s16235	17.4991	-5.43479	University of North Carolina
s16271	50.235	27.1034	University of North Carolina
s16224	0.855097	-0.50381	University of North Carolina
s16226	0.295589	-1.61065	University of North Carolina
s16207	5.20745	13.1716	MD Anderson - Institute for Applied Cancer Science
s16204	1.01305	-2.05194	MD Anderson - Institute for Applied Cancer Science
s16172	-3.97298	-4.58732	Harvard Medical School
s16198	-15.0598	-4.48599	Harvard Medical School
s16282	1.44306	2.04505	University of North Carolina
s16265	17.1728	-5.81926	University of North Carolina
s16167	25.2058	-12.9442	Broad Institute of MIT and Harvard
s16219	-8.18279	-4.32414	University of North Carolina
s16169	21.2317	-11.5326	Harvard Medical School
s16255	1.9507	-9.61799	University of North Carolina
s16203	33.3368	-5.68537	Harvard Medical School
s16201	-16.7786	19.3348	Baylor College of Medicine
s16189	-19.3482	2.1299	Harvard Medical School
s16221	-12.3892	-6.81883	University of North Carolina
s16173	-25.4124	9.27513	Harvard Medical School
s16176	-1.27211	1.39369	Harvard Medical School
s16208	-24.2691	12.6813	Harvard Medical School
s16194	-9.00559	0.752675	Harvard Medical School
s16251	15.1759	-5.84142	University of North Carolina
s16184	-2.97855	5.56124	Harvard Medical School
s16309	3.71116	2.99327	University of North Carolina
s16261	-0.00169776	-4.53397	University of North Carolina
s16191	8.75004	-13.4115	Baylor College of Medicine
s16227	8.31473	-10.711	University of North Carolina
s16305	15.9278	-2.33217	University of North Carolina
s16213	24.6669	-13.8623	University of North Carolina
s16274	12.3322	7.97021	University of North Carolina
s16188	-4.41238	-5.86972	Baylor College of Medicine
s16304	0.542789	-6.90948	University of North Carolina
s16171	10.3681	-11.1867	Baylor College of Medicine
s16266	13.8382	-9.17725	University of North Carolina
s16239	-5.31722	5.44498	University of North Carolina
s16307	-15.1767	13.7812	University of North Carolina
s16187	-4.14351	6.67421	Baylor College of Medicine
s16244	17.1728	0.304942	University of North Carolina
s16195	-3.277	1.86108	Harvard Medical School
s16252	-8.74387	-1.79079	University of North Carolina
s16245	18.9352	-2.22918	University of North Carolina
s16289	3.13204	-4.70562	University of North Carolina
s16294	8.58739	13.1709	University of North Carolina
s16299	-9.35341	1.97725	University of North Carolina
s16164	21.822	-0.289182	Broad Institute of MIT and Harvard
s16193	4.48388	-2.03556	Harvard Medical School
s16236	19.3176	-3.94143	University of North Carolina
s16286	-7.01066	-11.2551	University of North Carolina
s16242	-2.70463	-2.78915	University of North Carolina
s16293	0.122114	-1.66385	University of North Carolina
s16301	-14.7633	-6.82851	University of North Carolina
s16288	1.66248	-7.46334	University of North Carolina
s16297	-17.7795	9.02393	University of North Carolina
s16186	-16.1811	1.60785	Harvard Medical School
s16170	1.30413	-3.03872	Harvard Medical School
s16234	-1.24063	-2.91313	University of North Carolina
s16200	0.00170812	8.74755	Harvard Medical School
s16180	6.41628	-1.82743	Harvard Medical School
s16205	-9.56369	-2.95027	Harvard Medical School
s16257	0.861976	-1.11842	University of North Carolina
s16182	-11.2171	-2.93522	Harvard Medical School
s16178	6.55356	7.35929	Harvard Medical School
s16284	16.5605	-4.61127	University of North Carolina
s16269	9.49473	-7.05876	University of North Carolina
s16232	-1.40419	-6.47102	University of North Carolina
s16283	11.1606	-11.4294	University of North Carolina
s16262	2.61688	3.65742	University of North Carolina
s16258	-9.56254	6.80716	University of North Carolina
s16185	-1.4344	3.53201	Harvard Medical School
s16225	18.9304	-13.4418	University of North Carolina
s16220	-3.57538	-2.96362	University of North Carolina
s16192	-24.5496	17.2098	Baylor College of Medicine
s16248	9.50218	-2.4595	University of North Carolina
s16259	-10.205	3.4323	University of North Carolina
s16302	6.37301	-1.46534	University of North Carolina
s16277	-7.66405	-1.46712	University of North Carolina
s16247	-15.8804	-2.77766	University of North Carolina
s16241	-3.31401	-6.55565	University of North Carolina
s16276	5.35732	7.67353	University of North Carolina
s16177	-10.6666	3.02453	Baylor College of Medicine
s16237	-7.52908	-11.6827	University of North Carolina
s16310	10.5497	-14.1328	University of North Carolina
s16281	0.907639	1.69152	University of North Carolina
s16280	-5.323	-12.1842	University of North Carolina
s16179	11.6394	-11.3942	Baylor College of Medicine
s16292	13.0265	10.8933	University of North Carolina
s16291	-7.69131	16.711	University of North Carolina
s16199	2.87168	1.91502	Harvard Medical School
s16228	0.973175	-2.99294	University of North Carolina
s16206	-1.86901	25.163	MD Anderson - Institute for Applied Cancer Science
s16260	6.27639	-4.1698	University of North Carolina
s16290	5.41341	-6.71188	University of North Carolina
s16264	19.9749	-6.27195	University of North Carolina
s16270	-8.04896	-7.1044	University of North Carolina
s16196	8.988	-3.94256	Baylor College of Medicine
s16287	8.60527	-8.01289	University of North Carolina
s16285	9.5845	4.52075	University of North Carolina
s16233	-7.01702	-2.77456	University of North Carolina
s16250	-4.94646	-3.2721	University of North Carolina
s16222	6.22145	-14.996	University of North Carolina
s16279	7.15466	-9.86733	University of North Carolina
s16175	-6.33235	-3.02561	Harvard Medical School
s16165	27.2819	-7.26311	Broad Institute of MIT and Harvard
s16268	9.51004	-8.62971	University of North Carolina
s16210	-10.9284	0.422035	University of North Carolina
s16212	15.086	-19.3148	University of North Carolina
s16256	16.9861	-2.19059	University of North Carolina
s16275	-0.727217	-19.6174	University of North Carolina
s16253	14.9715	-9.05253	University of North Carolina
s16243	-8.11959	-9.36054	University of North Carolina
s16163	7.61574	-4.2273	Broad Institute of MIT and Harvard
s16246	-4.75445	0.988637	University of North Carolina
s16273	9.08553	14.0862	University of North Carolina
s16254	2.84103	-8.40422	University of North Carolina
s16298	-3.20986	2.58657	University of North Carolina
s16223	19.9666	-14.269	University of North Carolina
s16306	8.44847	-1.5597	University of North Carolina
s16168	14.2161	-6.83963	Harvard Medical School
s16303	4.84439	-2.24807	University of North Carolina
s16211	-10.7075	6.23101	University of North Carolina
s16272	-4.36848	5.14572	University of North Carolina
s16181	5.11255	-2.04245	Harvard Medical School
s16278	8.01615	-2.15375	University of North Carolina
s16214	-4.65405	-4.02161	University of North Carolina
s15527	-5.02676	3.33265	MD Anderson - Institute for Applied Cancer Science
s15483	20.0289	0.80664	Broad Institute of MIT and Harvard
s15518	20.9591	47.5167	Harvard Medical School
s15526	4.57174	-3.73068	MD Anderson - Institute for Applied Cancer Science
s15552	-12.2947	1.54222	University of North Carolina
s15584	6.65797	-8.37745	University of North Carolina
s15571	35.4711	-7.16038	University of North Carolina
s15537	-9.50653	-6.12337	University of North Carolina
s15557	4.50342	0.413812	University of North Carolina
s15540	-1.17858	-3.76628	University of North Carolina
s15509	8.78746	-5.82157	Harvard Medical School
s15484	25.4986	-1.38264	Broad Institute of MIT and Harvard
s15582	9.30698	-9.03471	University of North Carolina
s15590	4.27277	1.90568	University of North Carolina
s15534	29.5055	2.18805	Baylor College of Medicine
s15504	13.1069	-0.139102	Baylor College of Medicine
s15500	-8.45869	7.63535	Baylor College of Medicine
s15493	17.6149	-5.64918	Harvard Medical School
s15485	32.2551	-1.44504	Broad Institute of MIT and Harvard
s15585	28.1277	-15.143	University of North Carolina
s15599	-13.8938	8.12197	University of North Carolina
s15562	14.7782	-5.8234	University of North Carolina
s15531	21.9866	-6.24143	Harvard Medical School
s15551	9.69304	1.21146	University of North Carolina
s15516	-13.0665	-2.82968	Harvard Medical School
s15508	-22.2537	-3.75306	MD Anderson - Institute for Applied Cancer Science
s15587	14.3684	-2.59547	University of North Carolina
s15596	7.67113	-3.43652	University of North Carolina
s15544	16.6374	-10.9134	University of North Carolina
s15572	9.7903	-11.5302	University of North Carolina
s15486	24.3606	-21.6321	Broad Institute of MIT and Harvard
s15517	-18.0362	2.76535	MD Anderson - Institute for Applied Cancer Science
s15564	32.4155	-6.99759	University of North Carolina
s15487	13.3159	-4.14607	Harvard Medical School
s15546	-0.681042	0.0187557	University of North Carolina
s15497	-2.90961	-0.275707	Harvard Medical School
s15574	15.4104	30.6948	University of North Carolina
s15496	7.24628	-9.5643	Harvard Medical School
s15600	-0.601444	0.354558	University of North Carolina
s15594	4.15089	3.81112	University of North Carolina
s15567	-5.94981	0.388651	University of North Carolina
s15507	-1.19159	10.2359	Baylor College of Medicine
s15528	-2.95783	2.85934	MD Anderson - Institute for Applied Cancer Science
s15513	-1.60313	3.22303	Harvard Medical School
s15561	2.63907	0.1464	University of North Carolina
s15568	1.41431	3.97311	University of North Carolina
s15525	-0.904998	13.0624	Baylor College of Medicine
s15511	-7.68291	-8.8901	Baylor College of Medicine
s15543	12.563	-11.4449	University of North Carolina
s15510	6.8883	4.11969	Harvard Medical School
s15601	12.246	-12.233	University of North Carolina
s15566	20.5214	-3.98778	University of North Carolina
s15502	-12.8003	4.61466	Harvard Medical School
s15553	20.6112	-6.45377	University of North Carolina
s15560	-5.35741	-11.2523	University of North Carolina
s15598	7.95428	-0.847618	University of North Carolina
s15499	3.34436	-0.480417	Baylor College of Medicine
s15498	14.9961	-3.07676	Harvard Medical School
s15501	2.92099	-7.13863	Harvard Medical School
s15588	67.2644	18.2356	University of North Carolina
s15575	-0.977967	25.3764	University of North Carolina
s15536	-1.58711	-5.72992	University of North Carolina
s15592	-6.57598	9.83716	University of North Carolina
s15519	2.34453	20.6664	Harvard Medical School
s15556	15.2764	9.2007	University of North Carolina
s15491	-4.59674	-2.32745	Harvard Medical School
s15558	25.972	-16.5194	University of North Carolina
s15541	-9.7935	-7.4698	University of North Carolina
s15586	-0.632313	-5.46199	University of North Carolina
s15514	23.7903	-1.7443	Baylor College of Medicine
s15482	8.70178	-6.94352	Broad Institute of MIT and Harvard
s15523	-15.9452	3.06404	MD Anderson - Institute for Applied Cancer Science
s15535	9.33673	-6.6188	University of North Carolina
s15506	-4.48169	6.1674	MD Anderson - Institute for Applied Cancer Science
s15550	-8.9354	-1.92464	University of North Carolina
s15489	-18.2108	11.6515	Harvard Medical School
s15492	-14.857	-5.25406	Baylor College of Medicine
s15579	1.10511	4.15847	University of North Carolina
s15548	7.95028	-16.4756	University of North Carolina
s15569	0.284566	-0.909208	University of North Carolina
s15559	24.0462	1.47134	University of North Carolina
s15521	24.0391	-9.34991	Harvard Medical School
s15494	-14.555	3.77617	Harvard Medical School
s15580	1.69073	10.9864	University of North Carolina
s15563	8.81847	-11.5533	University of North Carolina
s15539	-12.8058	-2.19278	University of North Carolina
s15593	-6.45739	4.88162	University of North Carolina
s15595	0.166278	11.6593	University of North Carolina
s15505	-20.646	10.3898	Harvard Medical School
s15490	-7.90462	-7.85802	Harvard Medical School
s15581	3.50217	-5.60134	University of North Carolina
s15554	-2.94946	-4.95037	University of North Carolina
s15529	16.6667	-4.20334	Harvard Medical School
s15520	-20.963	4.0727	MD Anderson - Institute for Applied Cancer Science
s15515	-18.8929	-4.95397	Harvard Medical School
s15545	-8.22234	8.07891	University of North Carolina
s15591	7.16049	-8.94747	University of North Carolina
s15524	3.16002	6.31003	Baylor College of Medicine
s15549	5.80053	-8.75383	University of North Carolina
s15538	17.2219	6.09549	University of North Carolina
s15589	7.49757	-4.62329	University of North Carolina
s15512	-6.2237	-4.61731	Harvard Medical School
s15578	-2.35452	12.1587	University of North Carolina
s15533	0.644174	1.58956	Harvard Medical School
s15522	-13.1823	10.9882	MD Anderson - Institute for Applied Cancer Science
s15488	13.1705	-5.24873	Harvard Medical School
s15577	6.7482	-3.02052	University of North Carolina
s15532	-8.49186	2.0935	Harvard Medical School
s15570	26.6747	-7.38948	University of North Carolina
s15555	14.653	-1.636	University of North Carolina
s15495	4.36462	-8.27359	Harvard Medical School
s15576	7.06368	1.23771	University of North Carolina
s15530	-30.415	7.01174	Harvard Medical School
s15565	2.19307	-1.53228	University of North Carolina
s15597	3.65864	1.49344	University of North Carolina
s15503	-26.7372	22.4981	Baylor College of Medicine
s15573	4.72882	-3.28442	University of North Carolina
s15542	-0.752597	0.44184	University of North Carolina
s15547	-2.17326	-0.177938	University of North Carolina
s16069	0.200982	-9.00502	University of North Carolina
s16045	24.3423	4.06512	Harvard Medical School
s16041	0.372416	-0.557871	Harvard Medical School
s16040	-33.5869	10.7825	MD Anderson - Institute for Applied Cancer Science
s16018	2.22071	8.00133	Broad Institute of MIT and Harvard
s16129	7.95737	-7.33411	University of North Carolina
s16098	4.68837	-3.85973	University of North Carolina
s16088	14.9949	-15.5485	University of North Carolina
s16160	2.60836	-5.32447	University of North Carolina
s16151	1.66616	1.24606	University of North Carolina
s16034	-12.2404	9.64939	Harvard Medical School
s16120	11.3466	-14.2419	University of North Carolina
s16146	15.2064	-7.24664	University of North Carolina
s16052	-27.7011	4.72256	MD Anderson - Institute for Applied Cancer Science
s16043	8.4048	7.25006	Baylor College of Medicine
s16075	-14.6543	-6.99351	University of North Carolina
s16078	3.94846	-3.44182	University of North Carolina
s16044	-30.4212	5.13951	Harvard Medical School
s16104	28.0252	-11.3874	University of North Carolina
s16092	-3.94868	1.13884	University of North Carolina
s16097	-2.37671	-5.8566	University of North Carolina
s16066	-0.113681	-6.44854	University of North Carolina
s16123	12.9871	-16.1482	University of North Carolina
s16148	-5.11309	-5.83321	University of North Carolina
s16130	2.85206	-20.8408	University of North Carolina
s16061	-20.0533	22.5461	Baylor College of Medicine
s16136	6.31148	-9.13757	University of North Carolina
s16046	-5.35171	-1.23555	Harvard Medical School
s16074	3.98373	-4.72487	University of North Carolina
s16035	1.67128	6.09974	Harvard Medical School
s16089	3.25116	2.84527	University of North Carolina
s16141	26.7775	-5.97694	University of North Carolina
s16022	11.7255	-10.9361	Broad Institute of MIT and Harvard
s16037	-14.4116	6.80383	Harvard Medical School
s16025	-6.5956	16.1232	Baylor College of Medicine
s16073	-5.18869	6.78476	University of North Carolina
s16085	0.209761	-8.17613	University of North Carolina
s16156	-10.2299	17.9897	University of North Carolina
[truncated: 15,626 more rows]

## Sheet: Fig 1e
	group	variable	value
1	Raw Counts	sample_type	0.00155926
2	Voom	sample_type	0.00304882
3	Voom-SNM	sample_type	0.0102104
4	Raw Counts	disease_type	0.00253446
5	Voom	disease_type	0.0290528
6	Voom-SNM	disease_type	0.0505709
7	Raw Counts	data_submitting_center_label	0.342116
8	Voom	data_submitting_center_label	0.137796
9	Voom-SNM	data_submitting_center_label	0.018126
10	Raw Counts	platform	0.254989
11	Voom	platform	0.221617
12	Voom-SNM	platform	0.0314821
13	Raw Counts	experimental_strategy	0.362044
14	Voom	experimental_strategy	0.249728
15	Voom-SNM	experimental_strategy	0.0255936
16	Raw Counts	tissue_source_site_label	0.00421756
17	Voom	tissue_source_site_label	0.0191585
18	Voom-SNM	tissue_source_site_label	0.0117165
19	Raw Counts	portion_is_ffpe	6.33775e-06
20	Voom	portion_is_ffpe	0.0945597
21	Voom-SNM	portion_is_ffpe	0.000931293
22	Raw Counts	resid	0.032533
23	Voom	resid	0.245039
24	Voom-SNM	resid	0.851369

## Sheet: Figs 1f-h
	aucroc_fullData.x	aupr_fullData.x	aucroc_fullData.y	aupr_fullData.y	aucroc_fullData	aupr_fullData
ACC	0.999969	0.994518	NA	NA	NA	NA
BLCA	0.925438	0.474854	0.874251	0.986572	NA	NA
BRCA	0.953934	0.808679	0.96574	0.995026	0.539683	0.0928526
CESC	0.977747	0.785353	NA	NA	NA	NA
CHOL	0.823953	0.459902	NA	NA	NA	NA
COAD	0.989397	0.890546	0.96337	0.996879	0.804813	0.809206
DLBC	0.87717	0.361838	NA	NA	NA	NA
ESCA	0.994793	0.907193	0.867879	0.978141	NA	NA
GBM	0.997152	0.965169	NA	NA	NA	NA
HNSC	0.982008	0.879462	0.906832	0.987102	0.657546	0.954009
KICH	0.998718	0.940555	0.979876	0.987621	NA	NA
KIRC	0.991566	0.952374	0.986773	0.998598	0.884837	0.741962
KIRP	0.977162	0.734855	0.836458	0.966786	NA	NA
LGG	0.989597	0.90415	NA	NA	NA	NA
LIHC	0.991301	0.940399	0.983103	0.997229	NA	NA
LUAD	0.9718	0.737	0.864461	0.951188	0.478732	0.109629
LUSC	0.964708	0.76562	0.963251	0.994516	NA	NA
MESO	0.958025	0.654108	NA	NA	NA	NA
OV	0.995648	0.966332	NA	NA	NA	NA
PAAD	0.982426	0.831206	NA	NA	NA	NA
PCPG	0.983152	0.733265	NA	NA	NA	NA
PRAD	0.980667	0.880002	0.903385	0.987634	NA	NA
READ	0.996716	0.930222	NA	NA	0.75	0.748102
SARC	0.985298	0.880277	NA	NA	NA	NA
SKCM	0.959235	0.585531	NA	NA	NA	NA
STAD	0.987374	0.908962	0.932145	0.990367	0.85986	0.749826
TGCT	0.992683	0.911972	NA	NA	NA	NA
THCA	0.97212	0.813313	0.852263	0.976444	0.606061	0.201819
THYM	0.978188	0.610404	NA	NA	NA	NA
UCEC	0.97787	0.888403	0.994589	0.999841	NA	NA
UCS	0.983489	0.802254	NA	NA	NA	NA
UVM	0.989625	0.834692	NA	NA	NA	NA
