# Supplementary material for: RETRACTED ARTICLE: Microbiome analyses of blood and tissues suggest cancerdiagnostic approach
Source: Springer Nature journal article supplement (doi:10.1038/s41586-020-2095-1), 2020-03-11
Supplement: 41586_2020_2095_MOESM4_ESM.xlsx [file 41586_2020_2095_MOESM4_ESM.xlsx]

## Sheet: Fig 3a
	Anterior nares	Buccal mucosa	L_Retroauricular crease	Posterior fornix	R_Retroauricular crease	Stool	Supragingival plaque	Tongue dorsum	Unknown
Mean Value	0.0188071	0.0116629	0.00122286	0.00120571	0.00143429	0.201717	0.00473	0.00939714	0.749823
SE	0.00169711	0.00164935	6.48033e-05	0.00011417	8.3725e-05	0.0254593	0.000185224	0.000499967	0.025076
SampleID	Anterior nares	Buccal mucosa	L_Retroauricular crease	Posterior fornix	R_Retroauricular crease	Stool	Supragingival plaque	Tongue dorsum	Unknown
s13385	0.0158	0.0099	0.0006	0.0005	0.0012	0.2175	0.0049	0.0115	0.7381
s13382	0.009	0.0083	0.001	0.0021	0.0008	0.6844	0.0049	0.0089	0.2806
s13031	0.0269	0.0249	0.0013	0.0003	0.0012	0.1626	0.0065	0.0136	0.7627
s13590	0.0177	0.003	0.001	0.0002	0.0027	0.0299	0.0051	0.0058	0.9346
s13687	0.0066	0.0055	0.0006	0.0004	0.0006	0.1998	0.0031	0.0044	0.779
s13127	0.0099	0.005	0.0007	0.0005	0.0009	0.1197	0.0041	0.0094	0.8498
s13129	0.0122	0.0062	0.0013	0.0005	0.0007	0.0863	0.0034	0.0052	0.8842
s13623	0.0074	0.0048	0.001	0.0008	0.0016	0.0499	0.0049	0.0041	0.9255
s12866	0.0261	0.0232	0.0017	0.0005	0.0021	0.2188	0.006	0.021	0.7006
s13282	0.0108	0.0082	0.001	0.0009	0.0011	0.1096	0.0055	0.0102	0.8527
s13305	0.0113	0.0035	0.001	0.0002	0.0019	0.0935	0.004	0.0051	0.8795
s13131	0.0149	0.005	0.0014	0.0006	0.0013	0.1064	0.003	0.0077	0.8597
s13103	0.0216	0.0352	0.0013	0.0039	0.0008	0.0875	0.0054	0.0151	0.8292
s13751	0.0044	0.0027	0.0001	0.0009	0.0005	0.0953	0.0035	0.0051	0.8875
s13510	0.0038	0.0017	0.0009	0.0015	0.0015	0.8513	0.0038	0.0125	0.123
s12885	0.0275	0.0377	0.0018	0.0017	0.0011	0.4134	0.0062	0.0094	0.5012
s13261	0.0398	0.0127	0.0021	0.0018	0.0019	0.0864	0.0048	0.0115	0.839
s13841	0.0189	0.028	0.001	0.0024	0.0016	0.3842	0.0059	0.0131	0.5449
s13295	0.0073	0.0031	0.0008	0.0004	0.0008	0.0654	0.003	0.0075	0.9117
s13077	0.0321	0.0067	0.0012	0.0025	0.0022	0.1159	0.004	0.0103	0.8251
s13128	0.0139	0.0061	0.0017	0.0003	0.0015	0.0674	0.0036	0.007	0.8985
s13622	0.0319	0.004	0.0017	0.0021	0.0022	0.0671	0.0033	0.0058	0.8819
s13463	0.098	0.0162	0.0011	0.0037	0.0033	0.093	0.0066	0.0121	0.766
s13464	0.0093	0.0048	0.0007	0.0006	0.0015	0.0513	0.0023	0.0068	0.9227
s13591	0.026	0.0062	0.0019	0.0029	0.0013	0.069	0.004	0.0081	0.8806
s13790	0.0177	0.0053	0.0014	0.0012	0.0012	0.2678	0.0052	0.0086	0.6916
s13352	0.0045	0.0122	0.0008	0.0014	0.0007	0.807	0.0035	0.0059	0.164
s13383	0.0017	0.0004	0.0003	0.0002	0.0001	0.2349	0.0008	0.0016	0.76
s13384	0.0184	0.0183	0.0009	0.0008	0.0018	0.1524	0.0068	0.0192	0.7814
s13601	0.0277	0.0055	0.0021	0.0006	0.0028	0.1496	0.0045	0.0063	0.8009
s12883	0.0014	0.0007	0	0.0001	0.0001	0.3207	0.0005	0.0003	0.6762
s13082	0.0236	0.0045	0.001	0.0018	0.0014	0.1212	0.0074	0.0098	0.8293
s12971	0.0144	0.0058	0.0006	0.0007	0.0012	0.1351	0.0041	0.0092	0.8289
s13608	0.0164	0.0133	0.0013	0.0019	0.0019	0.1063	0.005	0.0156	0.8383
s12972	0.0288	0.0056	0.0009	0.0004	0.0024	0.0525	0.0043	0.0073	0.8978
s13512	0.009	0.007	0.0011	0.0019	0.0006	0.7896	0.005	0.0044	0.1814
s13838	0.0145	0.0076	0.0017	0.0011	0.0018	0.7185	0.0086	0.0084	0.2378
s13443	0.0197	0.0085	0.0014	0.0026	0.0019	0.1676	0.0039	0.0083	0.7861
s13134	0.0053	0.0067	0.0007	0.0007	0.0008	0.1333	0.0048	0.0078	0.8399
s13529	0.0413	0.0112	0.0015	0.0027	0.0025	0.0998	0.0053	0.0108	0.8249
s13017	0.0046	0.0035	0.0004	0.0003	0.0007	0.8599	0.0027	0.0036	0.1243
s13133	0.0065	0.0041	0.0004	0.0005	0.0006	0.0537	0.004	0.0056	0.9246
s13280	0.0157	0.006	0.0011	0.0024	0.0014	0.0989	0.0054	0.0076	0.8615
s13860	0.0089	0.0023	0.001	0.0016	0.002	0.0703	0.0034	0.0056	0.9049
s12875	0.0496	0.0097	0.0024	0.0002	0.0025	0.0902	0.0034	0.0092	0.8328
s13531	0.0225	0.0148	0.0022	0.0027	0.0017	0.0817	0.005	0.0082	0.8612
s13653	0.0076	0.0041	0.0009	0.0007	0.0009	0.7403	0.0052	0.0121	0.2282
s13110	0.0109	0.0091	0.001	0.0002	0.001	0.0962	0.003	0.0072	0.8714
s13033	0.0242	0.0157	0.0016	0.0009	0.0017	0.1468	0.0058	0.012	0.7913
s13661	0.0153	0.0122	0.0012	0.0007	0.0006	0.417	0.0045	0.0119	0.5366
s13380	0.0196	0.0212	0.0017	0.0027	0.0021	0.0903	0.0066	0.012	0.8438
s13503	0.0324	0.0389	0.0013	0.0015	0.0014	0.0761	0.0061	0.0182	0.8241
s13275	0.0174	0.0111	0.0013	0.0006	0.002	0.1219	0.0033	0.0107	0.8317
s13614	0.0361	0.004	0.0019	0.0013	0.0023	0.0906	0.0048	0.0064	0.8526
s13526	0.0295	0.018	0.0022	0.0027	0.0021	0.115	0.0069	0.0113	0.8123
s13308	0.0085	0.0048	0.0007	0.0002	0.0006	0.1596	0.0048	0.0049	0.8159
s12865	0.0211	0.0121	0.0009	0.0008	0.0011	0.1664	0.0062	0.0132	0.7782
s13760	0.0238	0.0103	0.0014	0.0005	0.0017	0.0484	0.0046	0.0094	0.8999
s13477	0.0062	0.0082	0.0008	0.0005	0.0004	0.1242	0.0027	0.0087	0.8483
s13528	0.0174	0.0747	0.002	0.0013	0.0012	0.0464	0.0057	0.0154	0.8359
s12934	0.0425	0.0038	0.0017	0.0014	0.0031	0.0948	0.0046	0.0049	0.8432
s13306	0.0086	0.0026	0.0005	0.0004	0.0008	0.0779	0.0025	0.0034	0.9033
s13470	0.0066	0.0099	0.0012	0.0004	0.0011	0.1562	0.0041	0.0096	0.8109
s13445	0.0121	0.0043	0.0007	0.0005	0.0013	0.0856	0.005	0.0086	0.8819
s13262	0.023	0.0098	0.0015	0.0008	0.0013	0.137	0.0068	0.0125	0.8073
s12974	0.0185	0.0073	0.0023	0.0005	0.0025	0.1671	0.0069	0.0147	0.7802
s12973	0.0214	0.0065	0.002	0.0009	0.0011	0.0706	0.0046	0.0084	0.8845
s13208	0.021	0.0775	0.0015	0.0014	0.001	0.307	0.0064	0.0176	0.5666
s13180	0.0195	0.0166	0.0014	0.0036	0.0014	0.1702	0.0084	0.0155	0.7634
s12874	0.018	0.0081	0.0018	0.0019	0.0013	0.378	0.0062	0.0147	0.57

## Sheet: Fig 3b
	sample_type	Fuso	disease_type
1	Primary Tumor	6.86013	Stomach Adenocarcinoma
2	Primary Tumor	6.5318	Stomach Adenocarcinoma
3	Primary Tumor	4.9089	Stomach Adenocarcinoma
4	Primary Tumor	6.88602	Stomach Adenocarcinoma
5	Primary Tumor	11.061	Stomach Adenocarcinoma
6	Primary Tumor	5.53806	Stomach Adenocarcinoma
7	Primary Tumor	5.67453	Stomach Adenocarcinoma
8	Primary Tumor	5.64408	Stomach Adenocarcinoma
9	Primary Tumor	5.62874	Stomach Adenocarcinoma
10	Solid Tissue Normal	5.97833	Stomach Adenocarcinoma
11	Primary Tumor	7.04153	Stomach Adenocarcinoma
12	Primary Tumor	6.41015	Stomach Adenocarcinoma
13	Primary Tumor	13.6303	Stomach Adenocarcinoma
14	Primary Tumor	5.49881	Stomach Adenocarcinoma
15	Primary Tumor	7.6426	Stomach Adenocarcinoma
16	Primary Tumor	5.33844	Stomach Adenocarcinoma
17	Primary Tumor	5.31879	Stomach Adenocarcinoma
18	Primary Tumor	5.80421	Stomach Adenocarcinoma
19	Primary Tumor	7.16532	Stomach Adenocarcinoma
20	Solid Tissue Normal	4.14392	Stomach Adenocarcinoma
21	Primary Tumor	5.34169	Stomach Adenocarcinoma
22	Primary Tumor	8.37485	Stomach Adenocarcinoma
23	Blood Derived Normal	5.46767	Stomach Adenocarcinoma
24	Primary Tumor	5.56245	Stomach Adenocarcinoma
25	Primary Tumor	5.2947	Stomach Adenocarcinoma
26	Primary Tumor	5.23518	Stomach Adenocarcinoma
27	Primary Tumor	5.52957	Stomach Adenocarcinoma
28	Primary Tumor	6.33671	Stomach Adenocarcinoma
29	Primary Tumor	5.46682	Stomach Adenocarcinoma
30	Primary Tumor	7.02971	Stomach Adenocarcinoma
31	Primary Tumor	6.6335	Stomach Adenocarcinoma
32	Primary Tumor	7.00303	Stomach Adenocarcinoma
33	Primary Tumor	3.03066	Stomach Adenocarcinoma
34	Primary Tumor	6.10048	Stomach Adenocarcinoma
35	Primary Tumor	6.03357	Stomach Adenocarcinoma
36	Primary Tumor	6.28746	Stomach Adenocarcinoma
37	Blood Derived Normal	3.86977	Stomach Adenocarcinoma
38	Primary Tumor	5.72581	Stomach Adenocarcinoma
39	Primary Tumor	5.68285	Stomach Adenocarcinoma
40	Primary Tumor	1.90904	Stomach Adenocarcinoma
41	Primary Tumor	6.3207	Stomach Adenocarcinoma
42	Blood Derived Normal	4.65989	Stomach Adenocarcinoma
43	Primary Tumor	5.85027	Stomach Adenocarcinoma
44	Primary Tumor	4.75783	Stomach Adenocarcinoma
45	Primary Tumor	3.43929	Stomach Adenocarcinoma
46	Blood Derived Normal	4.9114	Stomach Adenocarcinoma
47	Solid Tissue Normal	5.04639	Stomach Adenocarcinoma
48	Primary Tumor	5.76202	Stomach Adenocarcinoma
49	Primary Tumor	7.2275	Stomach Adenocarcinoma
50	Primary Tumor	7.23585	Stomach Adenocarcinoma
51	Primary Tumor	4.87436	Stomach Adenocarcinoma
52	Primary Tumor	8.94457	Stomach Adenocarcinoma
53	Primary Tumor	5.5009	Stomach Adenocarcinoma
54	Primary Tumor	7.43069	Stomach Adenocarcinoma
55	Primary Tumor	5.57197	Stomach Adenocarcinoma
56	Primary Tumor	7.42203	Stomach Adenocarcinoma
57	Primary Tumor	5.59818	Stomach Adenocarcinoma
58	Primary Tumor	5.5363	Stomach Adenocarcinoma
59	Primary Tumor	5.0233	Stomach Adenocarcinoma
60	Primary Tumor	5.592	Stomach Adenocarcinoma
61	Primary Tumor	5.56284	Stomach Adenocarcinoma
62	Primary Tumor	6.07525	Stomach Adenocarcinoma
63	Primary Tumor	6.27092	Stomach Adenocarcinoma
64	Primary Tumor	5.2264	Stomach Adenocarcinoma
65	Primary Tumor	3.43756	Stomach Adenocarcinoma
66	Blood Derived Normal	5.73161	Stomach Adenocarcinoma
67	Primary Tumor	6.00536	Stomach Adenocarcinoma
68	Solid Tissue Normal	5.75228	Stomach Adenocarcinoma
69	Primary Tumor	7.16977	Stomach Adenocarcinoma
70	Primary Tumor	6.52923	Stomach Adenocarcinoma
71	Primary Tumor	7.56067	Stomach Adenocarcinoma
72	Primary Tumor	6.2149	Stomach Adenocarcinoma
73	Primary Tumor	5.88635	Stomach Adenocarcinoma
74	Primary Tumor	11.423	Stomach Adenocarcinoma
75	Primary Tumor	5.10696	Stomach Adenocarcinoma
76	Primary Tumor	5.50652	Stomach Adenocarcinoma
77	Primary Tumor	6.0944	Stomach Adenocarcinoma
78	Primary Tumor	9.42391	Stomach Adenocarcinoma
79	Primary Tumor	6.41655	Stomach Adenocarcinoma
80	Primary Tumor	6.56522	Stomach Adenocarcinoma
81	Solid Tissue Normal	5.53287	Stomach Adenocarcinoma
82	Primary Tumor	6.1512	Stomach Adenocarcinoma
83	Blood Derived Normal	5.42258	Stomach Adenocarcinoma
84	Primary Tumor	10.9416	Stomach Adenocarcinoma
85	Primary Tumor	9.43607	Stomach Adenocarcinoma
86	Primary Tumor	5.02727	Stomach Adenocarcinoma
87	Primary Tumor	6.75814	Stomach Adenocarcinoma
88	Blood Derived Normal	5.58276	Stomach Adenocarcinoma
89	Primary Tumor	8.09078	Stomach Adenocarcinoma
90	Primary Tumor	5.63487	Stomach Adenocarcinoma
91	Primary Tumor	1.90904	Stomach Adenocarcinoma
92	Primary Tumor	3.83219	Stomach Adenocarcinoma
93	Primary Tumor	5.58077	Stomach Adenocarcinoma
94	Primary Tumor	4.70706	Stomach Adenocarcinoma
95	Solid Tissue Normal	5.10655	Stomach Adenocarcinoma
96	Primary Tumor	5.84268	Stomach Adenocarcinoma
97	Primary Tumor	5.27527	Stomach Adenocarcinoma
98	Primary Tumor	9.42462	Stomach Adenocarcinoma
99	Blood Derived Normal	5.20192	Stomach Adenocarcinoma
100	Blood Derived Normal	5.18987	Stomach Adenocarcinoma
101	Primary Tumor	5.7258	Stomach Adenocarcinoma
102	Primary Tumor	13.964	Stomach Adenocarcinoma
103	Primary Tumor	9.01134	Stomach Adenocarcinoma
104	Primary Tumor	9.01135	Stomach Adenocarcinoma
105	Primary Tumor	6.20419	Stomach Adenocarcinoma
106	Primary Tumor	7.81618	Stomach Adenocarcinoma
107	Primary Tumor	5.4616	Stomach Adenocarcinoma
108	Primary Tumor	5.80337	Stomach Adenocarcinoma
109	Primary Tumor	5.83537	Stomach Adenocarcinoma
110	Blood Derived Normal	4.94659	Stomach Adenocarcinoma
111	Primary Tumor	5.10687	Stomach Adenocarcinoma
112	Primary Tumor	10.2044	Stomach Adenocarcinoma
113	Solid Tissue Normal	6.89613	Stomach Adenocarcinoma
114	Primary Tumor	6.65789	Stomach Adenocarcinoma
115	Primary Tumor	11.2338	Stomach Adenocarcinoma
116	Primary Tumor	6.80443	Stomach Adenocarcinoma
117	Primary Tumor	7.21285	Stomach Adenocarcinoma
118	Primary Tumor	4.44935	Stomach Adenocarcinoma
119	Primary Tumor	8.61596	Stomach Adenocarcinoma
120	Primary Tumor	6.18828	Stomach Adenocarcinoma
121	Blood Derived Normal	7.54773	Stomach Adenocarcinoma
122	Primary Tumor	8.55563	Stomach Adenocarcinoma
123	Blood Derived Normal	4.64593	Stomach Adenocarcinoma
124	Primary Tumor	3.42815	Stomach Adenocarcinoma
125	Primary Tumor	8.25857	Stomach Adenocarcinoma
126	Primary Tumor	9.76994	Stomach Adenocarcinoma
127	Primary Tumor	4.75248	Stomach Adenocarcinoma
128	Primary Tumor	5.39033	Stomach Adenocarcinoma
129	Primary Tumor	6.20107	Stomach Adenocarcinoma
130	Primary Tumor	6.00517	Stomach Adenocarcinoma
131	Primary Tumor	8.82732	Stomach Adenocarcinoma
132	Solid Tissue Normal	5.78107	Stomach Adenocarcinoma
133	Primary Tumor	5.58172	Stomach Adenocarcinoma
134	Primary Tumor	5.23351	Stomach Adenocarcinoma
135	Primary Tumor	5.39035	Stomach Adenocarcinoma
136	Primary Tumor	5.45112	Stomach Adenocarcinoma
137	Primary Tumor	6.28848	Stomach Adenocarcinoma
138	Primary Tumor	3.67032	Stomach Adenocarcinoma
139	Primary Tumor	6.51389	Stomach Adenocarcinoma
140	Primary Tumor	13.3262	Stomach Adenocarcinoma
141	Primary Tumor	6.52886	Stomach Adenocarcinoma
142	Primary Tumor	2.77744	Stomach Adenocarcinoma
143	Primary Tumor	6.2568	Stomach Adenocarcinoma
144	Primary Tumor	6.62892	Stomach Adenocarcinoma
145	Solid Tissue Normal	6.93445	Stomach Adenocarcinoma
146	Primary Tumor	2.5881	Stomach Adenocarcinoma
147	Primary Tumor	5.30362	Stomach Adenocarcinoma
148	Primary Tumor	6.40094	Stomach Adenocarcinoma
149	Primary Tumor	6.90347	Stomach Adenocarcinoma
150	Primary Tumor	5.44112	Stomach Adenocarcinoma
151	Primary Tumor	6.65167	Stomach Adenocarcinoma
152	Primary Tumor	6.88753	Stomach Adenocarcinoma
153	Primary Tumor	7.83602	Stomach Adenocarcinoma
154	Primary Tumor	6.02895	Stomach Adenocarcinoma
155	Primary Tumor	14.1212	Stomach Adenocarcinoma
156	Blood Derived Normal	5.50805	Stomach Adenocarcinoma
157	Primary Tumor	6.7408	Stomach Adenocarcinoma
158	Primary Tumor	3.73642	Stomach Adenocarcinoma
159	Solid Tissue Normal	10.3784	Stomach Adenocarcinoma
160	Primary Tumor	6.5877	Stomach Adenocarcinoma
161	Primary Tumor	5.17207	Stomach Adenocarcinoma
162	Blood Derived Normal	4.86082	Stomach Adenocarcinoma
163	Blood Derived Normal	5.91154	Stomach Adenocarcinoma
164	Primary Tumor	7.16083	Stomach Adenocarcinoma
165	Primary Tumor	6.73408	Stomach Adenocarcinoma
166	Primary Tumor	5.09248	Stomach Adenocarcinoma
167	Primary Tumor	6.43464	Stomach Adenocarcinoma
168	Primary Tumor	3.41856	Stomach Adenocarcinoma
169	Primary Tumor	5.79664	Stomach Adenocarcinoma
170	Primary Tumor	3.33504	Stomach Adenocarcinoma
171	Primary Tumor	6.17602	Stomach Adenocarcinoma
172	Primary Tumor	5.36157	Stomach Adenocarcinoma
173	Primary Tumor	5.49881	Stomach Adenocarcinoma
174	Solid Tissue Normal	4.96591	Stomach Adenocarcinoma
175	Primary Tumor	9.08035	Stomach Adenocarcinoma
176	Primary Tumor	6.22633	Stomach Adenocarcinoma
177	Primary Tumor	6.57994	Stomach Adenocarcinoma
178	Primary Tumor	6.53926	Stomach Adenocarcinoma
179	Primary Tumor	4.53696	Stomach Adenocarcinoma
180	Primary Tumor	4.76154	Stomach Adenocarcinoma
181	Primary Tumor	8.43368	Stomach Adenocarcinoma
182	Primary Tumor	7.12348	Stomach Adenocarcinoma
183	Primary Tumor	5.45112	Stomach Adenocarcinoma
184	Primary Tumor	10.6491	Stomach Adenocarcinoma
185	Blood Derived Normal	4.74123	Stomach Adenocarcinoma
186	Primary Tumor	4.87434	Stomach Adenocarcinoma
187	Primary Tumor	4.69867	Stomach Adenocarcinoma
188	Primary Tumor	9.01777	Stomach Adenocarcinoma
189	Solid Tissue Normal	6.63751	Stomach Adenocarcinoma
190	Primary Tumor	6.13046	Stomach Adenocarcinoma
191	Primary Tumor	5.57515	Stomach Adenocarcinoma
192	Primary Tumor	7.17197	Stomach Adenocarcinoma
193	Solid Tissue Normal	5.24479	Stomach Adenocarcinoma
194	Primary Tumor	5.67661	Stomach Adenocarcinoma
195	Primary Tumor	5.11051	Stomach Adenocarcinoma
196	Primary Tumor	7.76018	Stomach Adenocarcinoma
197	Primary Tumor	5.00451	Stomach Adenocarcinoma
198	Primary Tumor	3.97747	Stomach Adenocarcinoma
199	Solid Tissue Normal	5.04494	Stomach Adenocarcinoma
200	Primary Tumor	6.86017	Stomach Adenocarcinoma
201	Primary Tumor	13.3901	Stomach Adenocarcinoma
202	Primary Tumor	16.9959	Stomach Adenocarcinoma
203	Primary Tumor	4.64029	Stomach Adenocarcinoma
204	Primary Tumor	5.58445	Stomach Adenocarcinoma
205	Primary Tumor	5.73842	Stomach Adenocarcinoma
206	Primary Tumor	6.00304	Stomach Adenocarcinoma
207	Primary Tumor	4.77683	Stomach Adenocarcinoma
208	Primary Tumor	8.05359	Stomach Adenocarcinoma
209	Primary Tumor	5.57502	Stomach Adenocarcinoma
210	Primary Tumor	4.38734	Stomach Adenocarcinoma
211	Blood Derived Normal	5.10626	Stomach Adenocarcinoma
212	Primary Tumor	5.74648	Stomach Adenocarcinoma
213	Primary Tumor	14.0901	Stomach Adenocarcinoma
214	Primary Tumor	5.65231	Stomach Adenocarcinoma
215	Primary Tumor	6.90347	Stomach Adenocarcinoma
216	Primary Tumor	5.2858	Stomach Adenocarcinoma
217	Blood Derived Normal	5.59724	Stomach Adenocarcinoma
218	Primary Tumor	5.52867	Stomach Adenocarcinoma
219	Primary Tumor	6.30611	Stomach Adenocarcinoma
220	Primary Tumor	6.0243	Stomach Adenocarcinoma
221	Blood Derived Normal	4.84754	Stomach Adenocarcinoma
222	Primary Tumor	6.62308	Stomach Adenocarcinoma
223	Primary Tumor	5.28584	Stomach Adenocarcinoma
224	Primary Tumor	5.80788	Stomach Adenocarcinoma
225	Primary Tumor	7.27136	Stomach Adenocarcinoma
226	Primary Tumor	5.04218	Stomach Adenocarcinoma
227	Solid Tissue Normal	6.62158	Stomach Adenocarcinoma
228	Primary Tumor	7.27489	Stomach Adenocarcinoma
229	Primary Tumor	8.37423	Stomach Adenocarcinoma
230	Blood Derived Normal	4.07307	Stomach Adenocarcinoma
231	Primary Tumor	7.69839	Stomach Adenocarcinoma
232	Primary Tumor	4.66029	Stomach Adenocarcinoma
233	Primary Tumor	7.03346	Stomach Adenocarcinoma
234	Primary Tumor	5.80423	Stomach Adenocarcinoma
235	Primary Tumor	6.89512	Stomach Adenocarcinoma
236	Primary Tumor	7.23587	Stomach Adenocarcinoma
237	Primary Tumor	5.45465	Stomach Adenocarcinoma
238	Primary Tumor	10.5564	Stomach Adenocarcinoma
239	Primary Tumor	6.21185	Stomach Adenocarcinoma
240	Primary Tumor	4.70285	Stomach Adenocarcinoma
241	Blood Derived Normal	5.18458	Stomach Adenocarcinoma
242	Primary Tumor	5.86997	Stomach Adenocarcinoma
243	Solid Tissue Normal	7.13402	Stomach Adenocarcinoma
244	Primary Tumor	6.17935	Stomach Adenocarcinoma
245	Solid Tissue Normal	7.68583	Stomach Adenocarcinoma
246	Primary Tumor	6.38314	Stomach Adenocarcinoma
247	Primary Tumor	5.64837	Stomach Adenocarcinoma
248	Blood Derived Normal	5.63198	Stomach Adenocarcinoma
249	Primary Tumor	6.89512	Stomach Adenocarcinoma
250	Primary Tumor	14.3172	Stomach Adenocarcinoma
251	Primary Tumor	5.76066	Stomach Adenocarcinoma
252	Primary Tumor	7.99807	Stomach Adenocarcinoma
253	Primary Tumor	7.045	Stomach Adenocarcinoma
254	Solid Tissue Normal	5.99901	Stomach Adenocarcinoma
255	Solid Tissue Normal	5.89807	Stomach Adenocarcinoma
256	Primary Tumor	6.52579	Stomach Adenocarcinoma
257	Primary Tumor	6.41366	Stomach Adenocarcinoma
258	Primary Tumor	7.46028	Stomach Adenocarcinoma
259	Primary Tumor	7.26161	Stomach Adenocarcinoma
260	Primary Tumor	6.90539	Stomach Adenocarcinoma
261	Solid Tissue Normal	5.65806	Stomach Adenocarcinoma
262	Primary Tumor	5.88796	Stomach Adenocarcinoma
263	Solid Tissue Normal	4.90709	Stomach Adenocarcinoma
264	Primary Tumor	8.41078	Stomach Adenocarcinoma
265	Primary Tumor	6.00413	Stomach Adenocarcinoma
266	Blood Derived Normal	6.08703	Stomach Adenocarcinoma
267	Primary Tumor	6.75101	Stomach Adenocarcinoma
268	Primary Tumor	10.7118	Stomach Adenocarcinoma
269	Primary Tumor	6.33752	Stomach Adenocarcinoma
270	Primary Tumor	3.55235	Stomach Adenocarcinoma
271	Blood Derived Normal	4.83281	Stomach Adenocarcinoma
272	Primary Tumor	7.8749	Stomach Adenocarcinoma
273	Primary Tumor	9.54516	Stomach Adenocarcinoma
274	Primary Tumor	5.55834	Stomach Adenocarcinoma
275	Solid Tissue Normal	7.79023	Stomach Adenocarcinoma
276	Primary Tumor	5.46011	Stomach Adenocarcinoma
277	Solid Tissue Normal	5.90922	Stomach Adenocarcinoma
278	Primary Tumor	6.42355	Stomach Adenocarcinoma
279	Blood Derived Normal	5.35869	Stomach Adenocarcinoma
280	Primary Tumor	7.27134	Stomach Adenocarcinoma
281	Primary Tumor	5.79558	Stomach Adenocarcinoma
282	Blood Derived Normal	5.4183	Stomach Adenocarcinoma
283	Primary Tumor	5.54332	Stomach Adenocarcinoma
284	Primary Tumor	6.84019	Stomach Adenocarcinoma
285	Primary Tumor	6.20923	Stomach Adenocarcinoma
286	Solid Tissue Normal	5.97556	Stomach Adenocarcinoma
287	Primary Tumor	4.77503	Stomach Adenocarcinoma
288	Primary Tumor	6.82543	Stomach Adenocarcinoma
289	Primary Tumor	14.314	Stomach Adenocarcinoma
290	Primary Tumor	5.31339	Stomach Adenocarcinoma
291	Primary Tumor	6.80443	Stomach Adenocarcinoma
292	Primary Tumor	4.57999	Stomach Adenocarcinoma
293	Primary Tumor	3.71838	Stomach Adenocarcinoma
294	Primary Tumor	6.21345	Stomach Adenocarcinoma
295	Blood Derived Normal	5.16203	Stomach Adenocarcinoma
296	Primary Tumor	6.03346	Stomach Adenocarcinoma
297	Primary Tumor	8.65854	Stomach Adenocarcinoma
298	Primary Tumor	5.45883	Stomach Adenocarcinoma
299	Primary Tumor	3.97758	Stomach Adenocarcinoma
300	Primary Tumor	6.02734	Stomach Adenocarcinoma
301	Blood Derived Normal	4.70409	Stomach Adenocarcinoma
302	Primary Tumor	11.4637	Stomach Adenocarcinoma
303	Primary Tumor	5.53841	Stomach Adenocarcinoma
304	Solid Tissue Normal	5.53287	Stomach Adenocarcinoma
305	Blood Derived Normal	5.26852	Stomach Adenocarcinoma
306	Blood Derived Normal	5.08594	Stomach Adenocarcinoma
307	Primary Tumor	5.66806	Stomach Adenocarcinoma
308	Primary Tumor	3.89596	Stomach Adenocarcinoma
309	Blood Derived Normal	5.02938	Stomach Adenocarcinoma
310	Primary Tumor	6.36498	Stomach Adenocarcinoma
311	Primary Tumor	7.69848	Stomach Adenocarcinoma
312	Primary Tumor	6.34235	Stomach Adenocarcinoma
313	Primary Tumor	12.1045	Stomach Adenocarcinoma
314	Primary Tumor	5.64847	Stomach Adenocarcinoma
315	Primary Tumor	6.00215	Stomach Adenocarcinoma
316	Primary Tumor	5.95923	Stomach Adenocarcinoma
317	Primary Tumor	6.16518	Stomach Adenocarcinoma
318	Primary Tumor	5.40842	Stomach Adenocarcinoma
319	Primary Tumor	5.64101	Stomach Adenocarcinoma
320	Solid Tissue Normal	4.62063	Stomach Adenocarcinoma
321	Primary Tumor	5.54113	Stomach Adenocarcinoma
322	Primary Tumor	5.93816	Stomach Adenocarcinoma
323	Blood Derived Normal	8.81033	Stomach Adenocarcinoma
324	Primary Tumor	5.63193	Stomach Adenocarcinoma
325	Primary Tumor	6.22789	Stomach Adenocarcinoma
326	Primary Tumor	5.69739	Stomach Adenocarcinoma
327	Primary Tumor	5.9721	Stomach Adenocarcinoma
328	Primary Tumor	7.65739	Stomach Adenocarcinoma
329	Solid Tissue Normal	4.38553	Stomach Adenocarcinoma
330	Primary Tumor	8.06332	Stomach Adenocarcinoma
331	Primary Tumor	5.89953	Stomach Adenocarcinoma
332	Solid Tissue Normal	4.97826	Stomach Adenocarcinoma
333	Primary Tumor	6.06742	Stomach Adenocarcinoma
334	Solid Tissue Normal	7.96932	Stomach Adenocarcinoma
335	Blood Derived Normal	5.65773	Stomach Adenocarcinoma
336	Primary Tumor	6.74253	Stomach Adenocarcinoma
337	Primary Tumor	5.58242	Stomach Adenocarcinoma
338	Primary Tumor	7.7273	Stomach Adenocarcinoma
339	Primary Tumor	6.84167	Stomach Adenocarcinoma
340	Solid Tissue Normal	4.08226	Stomach Adenocarcinoma
341	Primary Tumor	16.1738	Stomach Adenocarcinoma
342	Primary Tumor	7.54817	Stomach Adenocarcinoma
343	Primary Tumor	9.43607	Stomach Adenocarcinoma
344	Primary Tumor	5.65569	Stomach Adenocarcinoma
345	Primary Tumor	4.7907	Stomach Adenocarcinoma
346	Primary Tumor	6.90945	Stomach Adenocarcinoma
347	Primary Tumor	5.48562	Stomach Adenocarcinoma
348	Blood Derived Normal	6.18965	Stomach Adenocarcinoma
349	Solid Tissue Normal	5.20352	Stomach Adenocarcinoma
350	Primary Tumor	5.74694	Stomach Adenocarcinoma
351	Solid Tissue Normal	6.66617	Stomach Adenocarcinoma
352	Primary Tumor	6.40015	Stomach Adenocarcinoma
353	Blood Derived Normal	4.84146	Stomach Adenocarcinoma
354	Primary Tumor	4.61441	Stomach Adenocarcinoma
355	Solid Tissue Normal	5.05701	Stomach Adenocarcinoma
356	Primary Tumor	6.28743	Stomach Adenocarcinoma
357	Primary Tumor	6.0944	Stomach Adenocarcinoma
358	Primary Tumor	3.38102	Stomach Adenocarcinoma
359	Blood Derived Normal	5.28719	Stomach Adenocarcinoma
360	Solid Tissue Normal	4.99451	Stomach Adenocarcinoma
361	Primary Tumor	5.4616	Stomach Adenocarcinoma
362	Primary Tumor	4.03193	Stomach Adenocarcinoma
363	Primary Tumor	5.82638	Stomach Adenocarcinoma
364	Primary Tumor	9.00555	Stomach Adenocarcinoma
365	Primary Tumor	5.71512	Stomach Adenocarcinoma
366	Primary Tumor	7.42951	Stomach Adenocarcinoma
367	Solid Tissue Normal	5.04514	Stomach Adenocarcinoma
368	Solid Tissue Normal	6.83135	Stomach Adenocarcinoma
369	Primary Tumor	4.44143	Stomach Adenocarcinoma
370	Primary Tumor	5.02675	Stomach Adenocarcinoma
371	Blood Derived Normal	5.61944	Stomach Adenocarcinoma
372	Solid Tissue Normal	7.45623	Stomach Adenocarcinoma
373	Primary Tumor	5.83904	Stomach Adenocarcinoma
374	Blood Derived Normal	3.91341	Stomach Adenocarcinoma
375	Primary Tumor	6.38661	Stomach Adenocarcinoma
376	Primary Tumor	5.50454	Stomach Adenocarcinoma
377	Primary Tumor	7.27236	Stomach Adenocarcinoma
378	Primary Tumor	5.93868	Stomach Adenocarcinoma
379	Solid Tissue Normal	5.24479	Stomach Adenocarcinoma
380	Primary Tumor	7.63272	Stomach Adenocarcinoma
381	Primary Tumor	6.33701	Stomach Adenocarcinoma
382	Primary Tumor	6.39035	Stomach Adenocarcinoma
383	Primary Tumor	7.16908	Stomach Adenocarcinoma
384	Blood Derived Normal	4.41735	Stomach Adenocarcinoma
385	Primary Tumor	6.70606	Stomach Adenocarcinoma
386	Primary Tumor	10.5564	Stomach Adenocarcinoma
387	Primary Tumor	7.26619	Stomach Adenocarcinoma
388	Blood Derived Normal	4.74123	Stomach Adenocarcinoma
389	Primary Tumor	5.79915	Stomach Adenocarcinoma
390	Primary Tumor	6.03346	Stomach Adenocarcinoma
391	Primary Tumor	8.01739	Stomach Adenocarcinoma
392	Primary Tumor	5.673	Stomach Adenocarcinoma
393	Primary Tumor	9.14518	Stomach Adenocarcinoma
394	Primary Tumor	4.51072	Stomach Adenocarcinoma
395	Primary Tumor	6.82699	Stomach Adenocarcinoma
396	Primary Tumor	5.84355	Stomach Adenocarcinoma
397	Solid Tissue Normal	5.61625	Stomach Adenocarcinoma
398	Primary Tumor	9.71157	Stomach Adenocarcinoma
399	Primary Tumor	4.79839	Stomach Adenocarcinoma
400	Primary Tumor	6.36466	Stomach Adenocarcinoma
401	Primary Tumor	7.6621	Stomach Adenocarcinoma
402	Blood Derived Normal	5.86334	Stomach Adenocarcinoma
403	Primary Tumor	2.6453	Stomach Adenocarcinoma
404	Primary Tumor	7.70376	Stomach Adenocarcinoma
405	Primary Tumor	5.83569	Stomach Adenocarcinoma
406	Solid Tissue Normal	5.24525	Stomach Adenocarcinoma
407	Blood Derived Normal	5.88313	Stomach Adenocarcinoma
408	Solid Tissue Normal	6.97374	Stomach Adenocarcinoma
409	Primary Tumor	6.1123	Stomach Adenocarcinoma
410	Solid Tissue Normal	10.6603	Stomach Adenocarcinoma
411	Blood Derived Normal	5.16943	Stomach Adenocarcinoma
412	Solid Tissue Normal	5.72111	Stomach Adenocarcinoma
413	Primary Tumor	5.88337	Stomach Adenocarcinoma
414	Primary Tumor	4.41174	Stomach Adenocarcinoma
415	Blood Derived Normal	5.59765	Stomach Adenocarcinoma
416	Primary Tumor	6.94122	Stomach Adenocarcinoma
417	Primary Tumor	5.27848	Stomach Adenocarcinoma
418	Primary Tumor	7.76037	Stomach Adenocarcinoma
419	Primary Tumor	7.13231	Stomach Adenocarcinoma
420	Primary Tumor	5.81893	Stomach Adenocarcinoma
421	Blood Derived Normal	6.10194	Stomach Adenocarcinoma
422	Primary Tumor	6.15226	Stomach Adenocarcinoma
423	Primary Tumor	13.7066	Stomach Adenocarcinoma
424	Primary Tumor	4.6948	Stomach Adenocarcinoma
425	Blood Derived Normal	5.36112	Stomach Adenocarcinoma
426	Solid Tissue Normal	5.12475	Stomach Adenocarcinoma
427	Solid Tissue Normal	5.24522	Stomach Adenocarcinoma
428	Primary Tumor	7.4046	Stomach Adenocarcinoma
429	Solid Tissue Normal	6.25104	Stomach Adenocarcinoma
430	Solid Tissue Normal	3.83343	Stomach Adenocarcinoma
431	Primary Tumor	5.8793	Stomach Adenocarcinoma
432	Primary Tumor	5.88635	Stomach Adenocarcinoma
433	Blood Derived Normal	5.76145	Stomach Adenocarcinoma
434	Primary Tumor	5.568	Stomach Adenocarcinoma
435	Primary Tumor	5.64408	Stomach Adenocarcinoma
436	Primary Tumor	7.04971	Stomach Adenocarcinoma
437	Blood Derived Normal	12.1295	Stomach Adenocarcinoma
438	Blood Derived Normal	5.53196	Stomach Adenocarcinoma
439	Primary Tumor	11.4904	Stomach Adenocarcinoma
440	Primary Tumor	2.6454	Stomach Adenocarcinoma
441	Primary Tumor	3.83282	Stomach Adenocarcinoma
442	Solid Tissue Normal	6.10122	Stomach Adenocarcinoma
443	Primary Tumor	6.05636	Stomach Adenocarcinoma
444	Primary Tumor	5.65225	Stomach Adenocarcinoma
445	Solid Tissue Normal	5.05836	Stomach Adenocarcinoma
446	Solid Tissue Normal	5.62058	Stomach Adenocarcinoma
447	Primary Tumor	5.8453	Stomach Adenocarcinoma
448	Primary Tumor	6.99215	Stomach Adenocarcinoma
449	Primary Tumor	4.87084	Stomach Adenocarcinoma
450	Primary Tumor	5.92669	Stomach Adenocarcinoma
451	Primary Tumor	5.13344	Stomach Adenocarcinoma
452	Primary Tumor	7.0062	Stomach Adenocarcinoma
453	Primary Tumor	9.68543	Stomach Adenocarcinoma
454	Primary Tumor	8.04774	Stomach Adenocarcinoma
455	Primary Tumor	7.04395	Stomach Adenocarcinoma
456	Primary Tumor	8.05755	Stomach Adenocarcinoma
457	Primary Tumor	5.63367	Stomach Adenocarcinoma
458	Solid Tissue Normal	6.62941	Stomach Adenocarcinoma
459	Primary Tumor	5.43949	Stomach Adenocarcinoma
460	Primary Tumor	4.49345	Stomach Adenocarcinoma
461	Primary Tumor	5.46681	Stomach Adenocarcinoma
462	Primary Tumor	6.22745	Stomach Adenocarcinoma
463	Primary Tumor	5.51259	Stomach Adenocarcinoma
464	Primary Tumor	6.43357	Stomach Adenocarcinoma
465	Primary Tumor	6.73903	Stomach Adenocarcinoma
466	Primary Tumor	8.05621	Stomach Adenocarcinoma
467	Primary Tumor	5.6746	Stomach Adenocarcinoma
468	Primary Tumor	6.41201	Stomach Adenocarcinoma
469	Solid Tissue Normal	5.34645	Stomach Adenocarcinoma
470	Primary Tumor	7.16534	Stomach Adenocarcinoma
471	Primary Tumor	14.1753	Stomach Adenocarcinoma
472	Primary Tumor	13.4649	Stomach Adenocarcinoma
473	Solid Tissue Normal	5.04514	Stomach Adenocarcinoma
474	Blood Derived Normal	4.89608	Stomach Adenocarcinoma
475	Primary Tumor	6.66139	Stomach Adenocarcinoma
476	Primary Tumor	5.87236	Stomach Adenocarcinoma
477	Primary Tumor	8.16237	Stomach Adenocarcinoma
478	Primary Tumor	3.38102	Stomach Adenocarcinoma
479	Primary Tumor	8.05621	Stomach Adenocarcinoma
480	Primary Tumor	6.33752	Stomach Adenocarcinoma
481	Primary Tumor	6.18828	Stomach Adenocarcinoma
482	Primary Tumor	7.016	Stomach Adenocarcinoma
483	Primary Tumor	8.80317	Stomach Adenocarcinoma
484	Blood Derived Normal	5.83995	Stomach Adenocarcinoma
485	Solid Tissue Normal	5.48258	Stomach Adenocarcinoma
486	Primary Tumor	6.74302	Stomach Adenocarcinoma
487	Primary Tumor	5.96833	Stomach Adenocarcinoma
488	Solid Tissue Normal	4.90709	Stomach Adenocarcinoma
489	Primary Tumor	4.1028	Stomach Adenocarcinoma
490	Primary Tumor	7.01508	Stomach Adenocarcinoma
491	Primary Tumor	6.56885	Stomach Adenocarcinoma
492	Primary Tumor	5.63153	Stomach Adenocarcinoma
493	Primary Tumor	8.71001	Stomach Adenocarcinoma
494	Primary Tumor	5.36146	Stomach Adenocarcinoma
495	Primary Tumor	5.86762	Stomach Adenocarcinoma
496	Primary Tumor	5.43759	Stomach Adenocarcinoma
497	Primary Tumor	5.74395	Stomach Adenocarcinoma
498	Primary Tumor	7.28077	Stomach Adenocarcinoma
499	Solid Tissue Normal	7.13247	Stomach Adenocarcinoma
500	Primary Tumor	5.10456	Stomach Adenocarcinoma
501	Primary Tumor	6.60034	Stomach Adenocarcinoma
502	Primary Tumor	6.39012	Stomach Adenocarcinoma
503	Primary Tumor	6.20923	Stomach Adenocarcinoma
504	Primary Tumor	5.62425	Stomach Adenocarcinoma
505	Primary Tumor	8.49728	Stomach Adenocarcinoma
506	Solid Tissue Normal	6.6607	Stomach Adenocarcinoma
507	Primary Tumor	7.5498	Stomach Adenocarcinoma
508	Blood Derived Normal	5.6986	Stomach Adenocarcinoma
509	Solid Tissue Normal	6.25264	Stomach Adenocarcinoma
510	Primary Tumor	6.33064	Stomach Adenocarcinoma
511	Primary Tumor	7.43067	Stomach Adenocarcinoma
512	Primary Tumor	2.5881	Stomach Adenocarcinoma
513	Primary Tumor	5.31337	Stomach Adenocarcinoma
514	Solid Tissue Normal	4.27039	Stomach Adenocarcinoma
515	Primary Tumor	6.88753	Stomach Adenocarcinoma
516	Primary Tumor	5.29515	Stomach Adenocarcinoma
517	Primary Tumor	7.81585	Stomach Adenocarcinoma
518	Solid Tissue Normal	4.81064	Stomach Adenocarcinoma
519	Primary Tumor	3.6537	Stomach Adenocarcinoma
520	Primary Tumor	6.08061	Stomach Adenocarcinoma
521	Primary Tumor	3.55235	Stomach Adenocarcinoma
522	Primary Tumor	5.75999	Stomach Adenocarcinoma
523	Primary Tumor	5.73711	Stomach Adenocarcinoma
524	Primary Tumor	3.73862	Stomach Adenocarcinoma
525	Primary Tumor	6.4101	Stomach Adenocarcinoma
526	Primary Tumor	9.85081	Stomach Adenocarcinoma
527	Primary Tumor	5.48733	Stomach Adenocarcinoma
528	Blood Derived Normal	3.69855	Stomach Adenocarcinoma
529	Primary Tumor	5.57119	Stomach Adenocarcinoma
530	Blood Derived Normal	6.33218	Stomach Adenocarcinoma
531	Primary Tumor	6.03286	Stomach Adenocarcinoma
532	Primary Tumor	6.41728	Stomach Adenocarcinoma
533	Primary Tumor	5.95163	Stomach Adenocarcinoma
534	Primary Tumor	4.99213	Stomach Adenocarcinoma
535	Solid Tissue Normal	4.78658	Stomach Adenocarcinoma
536	Blood Derived Normal	5.64646	Stomach Adenocarcinoma
537	Primary Tumor	7.92381	Stomach Adenocarcinoma
538	Primary Tumor	5.13344	Stomach Adenocarcinoma
539	Primary Tumor	5.18678	Stomach Adenocarcinoma
540	Primary Tumor	6.08748	Stomach Adenocarcinoma
541	Primary Tumor	4.64029	Stomach Adenocarcinoma
542	Blood Derived Normal	4.73169	Stomach Adenocarcinoma
543	Primary Tumor	6.48296	Stomach Adenocarcinoma
544	Primary Tumor	7.56103	Stomach Adenocarcinoma
545	Primary Tumor	6.32692	Stomach Adenocarcinoma
546	Primary Tumor	5.48785	Stomach Adenocarcinoma
547	Primary Tumor	6.00993	Stomach Adenocarcinoma
548	Primary Tumor	5.50459	Stomach Adenocarcinoma
549	Primary Tumor	5.14074	Stomach Adenocarcinoma
550	Primary Tumor	7.21281	Stomach Adenocarcinoma
551	Primary Tumor	7.25943	Stomach Adenocarcinoma
552	Primary Tumor	5.10456	Stomach Adenocarcinoma
553	Solid Tissue Normal	6.41546	Stomach Adenocarcinoma
554	Primary Tumor	7.12282	Stomach Adenocarcinoma
555	Primary Tumor	7.05602	Stomach Adenocarcinoma
556	Primary Tumor	4.10295	Stomach Adenocarcinoma
557	Primary Tumor	6.6952	Stomach Adenocarcinoma
558	Primary Tumor	5.46284	Stomach Adenocarcinoma
559	Primary Tumor	5.54695	Stomach Adenocarcinoma
560	Primary Tumor	6.65167	Stomach Adenocarcinoma
561	Primary Tumor	4.66962	Stomach Adenocarcinoma
562	Solid Tissue Normal	4.9298	Stomach Adenocarcinoma
563	Primary Tumor	2.23045	Stomach Adenocarcinoma
564	Primary Tumor	11.8441	Stomach Adenocarcinoma
565	Solid Tissue Normal	6.30322	Stomach Adenocarcinoma
566	Solid Tissue Normal	5.10655	Stomach Adenocarcinoma
567	Primary Tumor	7.5834	Stomach Adenocarcinoma
568	Primary Tumor	5.57381	Stomach Adenocarcinoma
569	Blood Derived Normal	5.49655	Stomach Adenocarcinoma
570	Primary Tumor	6.58845	Stomach Adenocarcinoma
571	Primary Tumor	5.75452	Stomach Adenocarcinoma
572	Primary Tumor	5.82142	Stomach Adenocarcinoma
573	Blood Derived Normal	5.06873	Stomach Adenocarcinoma
574	Primary Tumor	6.21187	Stomach Adenocarcinoma
575	Solid Tissue Normal	6.15921	Stomach Adenocarcinoma
576	Primary Tumor	7.67943	Stomach Adenocarcinoma
577	Primary Tumor	8.53506	Stomach Adenocarcinoma
578	Primary Tumor	4.10295	Stomach Adenocarcinoma
579	Primary Tumor	6.11233	Stomach Adenocarcinoma
580	Primary Tumor	6.54097	Stomach Adenocarcinoma
581	Primary Tumor	6.23232	Stomach Adenocarcinoma
582	Primary Tumor	6.0806	Stomach Adenocarcinoma
583	Primary Tumor	8.82726	Stomach Adenocarcinoma
584	Solid Tissue Normal	7.44001	Stomach Adenocarcinoma
585	Primary Tumor	5.70404	Stomach Adenocarcinoma
586	Primary Tumor	4.97524	Stomach Adenocarcinoma
587	Primary Tumor	6.9412	Stomach Adenocarcinoma
588	Blood Derived Normal	4.93253	Stomach Adenocarcinoma
589	Primary Tumor	7.54817	Stomach Adenocarcinoma
590	Primary Tumor	7.11593	Stomach Adenocarcinoma
591	Primary Tumor	5.92493	Stomach Adenocarcinoma
592	Primary Tumor	6.38658	Stomach Adenocarcinoma
593	Primary Tumor	5.29603	Stomach Adenocarcinoma
594	Primary Tumor	5.74622	Stomach Adenocarcinoma
595	Primary Tumor	6.71853	Stomach Adenocarcinoma
596	Solid Tissue Normal	5.19035	Stomach Adenocarcinoma
597	Primary Tumor	5.59731	Stomach Adenocarcinoma
598	Primary Tumor	5.91887	Stomach Adenocarcinoma
599	Primary Tumor	5.34796	Stomach Adenocarcinoma
600	Primary Tumor	7.42202	Stomach Adenocarcinoma
601	Blood Derived Normal	5.50456	Stomach Adenocarcinoma
602	Primary Tumor	5.44651	Stomach Adenocarcinoma
603	Primary Tumor	5.76421	Stomach Adenocarcinoma
604	Primary Tumor	6.3155	Stomach Adenocarcinoma
605	Primary Tumor	6.91878	Stomach Adenocarcinoma
606	Solid Tissue Normal	6.11646	Stomach Adenocarcinoma
607	Primary Tumor	11.1445	Stomach Adenocarcinoma
608	Primary Tumor	4.86324	Stomach Adenocarcinoma
609	Solid Tissue Normal	6.31927	Stomach Adenocarcinoma
610	Blood Derived Normal	6.08299	Stomach Adenocarcinoma
611	Solid Tissue Normal	9.9348	Stomach Adenocarcinoma
612	Primary Tumor	6.62191	Stomach Adenocarcinoma
613	Primary Tumor	5.67544	Stomach Adenocarcinoma
614	Primary Tumor	11.4234	Stomach Adenocarcinoma
615	Primary Tumor	5.84837	Stomach Adenocarcinoma
616	Solid Tissue Normal	7.10054	Stomach Adenocarcinoma
617	Solid Tissue Normal	5.14433	Stomach Adenocarcinoma
618	Primary Tumor	8.36213	Stomach Adenocarcinoma
619	Primary Tumor	8.61596	Stomach Adenocarcinoma
620	Primary Tumor	13.3263	Stomach Adenocarcinoma
621	Blood Derived Normal	4.64593	Stomach Adenocarcinoma
622	Primary Tumor	5.9953	Stomach Adenocarcinoma
623	Solid Tissue Normal	4.15607	Stomach Adenocarcinoma
624	Primary Tumor	6.39497	Stomach Adenocarcinoma
625	Blood Derived Normal	4.89719	Stomach Adenocarcinoma
626	Primary Tumor	5.04004	Stomach Adenocarcinoma
627	Primary Tumor	6.22512	Stomach Adenocarcinoma
628	Primary Tumor	5.25788	Stomach Adenocarcinoma
629	Solid Tissue Normal	8.37763	Stomach Adenocarcinoma
630	Solid Tissue Normal	7.03767	Stomach Adenocarcinoma
631	Primary Tumor	7.89935	Stomach Adenocarcinoma
632	Primary Tumor	5.04216	Stomach Adenocarcinoma
633	Solid Tissue Normal	5.14804	Stomach Adenocarcinoma
634	Solid Tissue Normal	5.20309	Stomach Adenocarcinoma
635	Primary Tumor	7.27392	Stomach Adenocarcinoma
636	Primary Tumor	6.00371	Stomach Adenocarcinoma
637	Primary Tumor	6.00536	Stomach Adenocarcinoma
638	Primary Tumor	4.66227	Stomach Adenocarcinoma
639	Blood Derived Normal	5.26736	Stomach Adenocarcinoma
640	Primary Tumor	5.84449	Stomach Adenocarcinoma
641	Primary Tumor	5.13643	Stomach Adenocarcinoma
642	Primary Tumor	8.28549	Stomach Adenocarcinoma
643	Primary Tumor	7.67258	Stomach Adenocarcinoma
644	Primary Tumor	5.84266	Stomach Adenocarcinoma
645	Primary Tumor	5.60528	Stomach Adenocarcinoma
646	Primary Tumor	10.9381	Stomach Adenocarcinoma
647	Blood Derived Normal	5.25445	Stomach Adenocarcinoma
648	Primary Tumor	7.39881	Stomach Adenocarcinoma
649	Primary Tumor	6.40973	Stomach Adenocarcinoma
650	Solid Tissue Normal	6.42231	Stomach Adenocarcinoma
651	Primary Tumor	7.21443	Stomach Adenocarcinoma
652	Primary Tumor	5.65116	Stomach Adenocarcinoma
653	Primary Tumor	6.64622	Stomach Adenocarcinoma
654	Primary Tumor	10.0556	Stomach Adenocarcinoma
655	Blood Derived Normal	5.67642	Stomach Adenocarcinoma
656	Primary Tumor	5.41726	Stomach Adenocarcinoma
657	Primary Tumor	10.2982	Stomach Adenocarcinoma
658	Primary Tumor	6.41522	Stomach Adenocarcinoma
659	Primary Tumor	5.76277	Stomach Adenocarcinoma
660	Blood Derived Normal	5.75003	Stomach Adenocarcinoma
661	Primary Tumor	6.00997	Stomach Adenocarcinoma
662	Primary Tumor	6.16752	Stomach Adenocarcinoma
663	Primary Tumor	4.10407	Stomach Adenocarcinoma
664	Primary Tumor	12.1515	Stomach Adenocarcinoma
665	Primary Tumor	4.79586	Stomach Adenocarcinoma
666	Primary Tumor	6.60165	Stomach Adenocarcinoma
667	Primary Tumor	6.48926	Stomach Adenocarcinoma
668	Primary Tumor	6.00596	Stomach Adenocarcinoma
669	Primary Tumor	7.16082	Stomach Adenocarcinoma
670	Primary Tumor	7.66222	Stomach Adenocarcinoma
671	Blood Derived Normal	6.2944	Stomach Adenocarcinoma
672	Primary Tumor	5.57957	Stomach Adenocarcinoma
673	Primary Tumor	6.03576	Stomach Adenocarcinoma
674	Primary Tumor	4.31129	Stomach Adenocarcinoma
675	Primary Tumor	5.48734	Stomach Adenocarcinoma
676	Primary Tumor	5.57731	Stomach Adenocarcinoma
677	Primary Tumor	7.97989	Stomach Adenocarcinoma
678	Primary Tumor	5.65532	Stomach Adenocarcinoma
679	Solid Tissue Normal	9.47754	Stomach Adenocarcinoma
680	Primary Tumor	6.25363	Stomach Adenocarcinoma
681	Primary Tumor	6.01639	Stomach Adenocarcinoma
682	Primary Tumor	7.02129	Stomach Adenocarcinoma
683	Primary Tumor	5.58328	Stomach Adenocarcinoma
684	Primary Tumor	6.66142	Stomach Adenocarcinoma
685	Solid Tissue Normal	6.10122	Stomach Adenocarcinoma
686	Blood Derived Normal	5.22371	Stomach Adenocarcinoma
687	Solid Tissue Normal	6.11642	Stomach Adenocarcinoma
688	Primary Tumor	5.06973	Stomach Adenocarcinoma
689	Primary Tumor	8.35065	Stomach Adenocarcinoma
690	Primary Tumor	4.69988	Stomach Adenocarcinoma
691	Primary Tumor	5.2264	Stomach Adenocarcinoma
692	Primary Tumor	5.58907	Stomach Adenocarcinoma
693	Blood Derived Normal	4.52369	Stomach Adenocarcinoma
694	Solid Tissue Normal	6.31892	Stomach Adenocarcinoma
695	Blood Derived Normal	4.8975	Stomach Adenocarcinoma
696	Primary Tumor	10.3142	Stomach Adenocarcinoma
697	Primary Tumor	8.16115	Stomach Adenocarcinoma
698	Primary Tumor	9.76937	Stomach Adenocarcinoma
699	Primary Tumor	5.63675	Stomach Adenocarcinoma
700	Primary Tumor	7.46028	Stomach Adenocarcinoma
701	Solid Tissue Normal	8.80532	Stomach Adenocarcinoma
702	Primary Tumor	7.23852	Stomach Adenocarcinoma
703	Blood Derived Normal	5.94326	Stomach Adenocarcinoma
704	Primary Tumor	7.04409	Stomach Adenocarcinoma
705	Primary Tumor	6.41286	Stomach Adenocarcinoma
706	Solid Tissue Normal	5.78107	Stomach Adenocarcinoma
707	Primary Tumor	6.1147	Stomach Adenocarcinoma
708	Primary Tumor	5.75452	Stomach Adenocarcinoma
709	Blood Derived Normal	5.0847	Stomach Adenocarcinoma
710	Primary Tumor	6.19022	Stomach Adenocarcinoma
711	Primary Tumor	8.45164	Stomach Adenocarcinoma
712	Primary Tumor	6.81682	Stomach Adenocarcinoma
713	Blood Derived Normal	6.03381	Stomach Adenocarcinoma
714	Primary Tumor	4.7907	Stomach Adenocarcinoma
715	Primary Tumor	5.71216	Stomach Adenocarcinoma
716	Blood Derived Normal	4.80327	Stomach Adenocarcinoma
717	Primary Tumor	5.89316	Stomach Adenocarcinoma
718	Primary Tumor	6.20424	Stomach Adenocarcinoma
719	Primary Tumor	6.86038	Stomach Adenocarcinoma
720	Primary Tumor	7.48282	Stomach Adenocarcinoma
721	Primary Tumor	5.30362	Stomach Adenocarcinoma
722	Primary Tumor	4.3096	Stomach Adenocarcinoma
723	Primary Tumor	3.6537	Stomach Adenocarcinoma
724	Solid Tissue Normal	9.6475	Stomach Adenocarcinoma
725	Primary Tumor	6.64875	Stomach Adenocarcinoma
726	Primary Tumor	5.68468	Stomach Adenocarcinoma
727	Primary Tumor	8.52468	Stomach Adenocarcinoma
728	Primary Tumor	7.21636	Stomach Adenocarcinoma
729	Blood Derived Normal	4.84967	Stomach Adenocarcinoma
730	Primary Tumor	5.45127	Stomach Adenocarcinoma
731	Solid Tissue Normal	8.91807	Stomach Adenocarcinoma
732	Primary Tumor	6.84021	Stomach Adenocarcinoma
733	Primary Tumor	6.88536	Stomach Adenocarcinoma
734	Primary Tumor	5.2947	Stomach Adenocarcinoma
735	Blood Derived Normal	5.21075	Stomach Adenocarcinoma
736	Primary Tumor	5.92498	Stomach Adenocarcinoma
737	Primary Tumor	6.39567	Stomach Adenocarcinoma
738	Primary Tumor	10.7054	Stomach Adenocarcinoma
739	Primary Tumor	6.26252	Stomach Adenocarcinoma
740	Primary Tumor	5.67875	Stomach Adenocarcinoma
741	Primary Tumor	5.96099	Stomach Adenocarcinoma
742	Primary Tumor	6.19501	Stomach Adenocarcinoma
743	Blood Derived Normal	4.11619	Stomach Adenocarcinoma
744	Solid Tissue Normal	4.17314	Stomach Adenocarcinoma
745	Blood Derived Normal	5.62169	Stomach Adenocarcinoma
746	Primary Tumor	7.67874	Stomach Adenocarcinoma
747	Primary Tumor	4.41402	Stomach Adenocarcinoma
748	Primary Tumor	6.21318	Stomach Adenocarcinoma
749	Primary Tumor	4.38734	Stomach Adenocarcinoma
750	Primary Tumor	4.90896	Stomach Adenocarcinoma
751	Primary Tumor	6.43471	Stomach Adenocarcinoma
752	Blood Derived Normal	5.10179	Stomach Adenocarcinoma
753	Blood Derived Normal	5.12871	Stomach Adenocarcinoma
754	Primary Tumor	5.63082	Stomach Adenocarcinoma
755	Primary Tumor	6.28994	Stomach Adenocarcinoma
756	Primary Tumor	6.1136	Stomach Adenocarcinoma
757	Primary Tumor	7.72349	Stomach Adenocarcinoma
758	Solid Tissue Normal	7.10054	Stomach Adenocarcinoma
759	Primary Tumor	5.6557	Stomach Adenocarcinoma
760	Primary Tumor	6.41009	Stomach Adenocarcinoma
761	Primary Tumor	18.2725	Stomach Adenocarcinoma
762	Primary Tumor	7.42968	Stomach Adenocarcinoma
763	Primary Tumor	5.83749	Stomach Adenocarcinoma
764	Blood Derived Normal	3.30049	Stomach Adenocarcinoma
765	Primary Tumor	7.16539	Stomach Adenocarcinoma
766	Primary Tumor	7.65366	Stomach Adenocarcinoma
767	Primary Tumor	8.28556	Stomach Adenocarcinoma
768	Primary Tumor	6.23118	Stomach Adenocarcinoma
769	Primary Tumor	10.2044	Stomach Adenocarcinoma
770	Primary Tumor	6.41778	Stomach Adenocarcinoma
771	Primary Tumor	5.58064	Stomach Adenocarcinoma
772	Solid Tissue Normal	3.82519	Stomach Adenocarcinoma
773	Primary Tumor	5.66093	Stomach Adenocarcinoma
774	Primary Tumor	6.25251	Stomach Adenocarcinoma
775	Primary Tumor	5.74694	Stomach Adenocarcinoma
776	Primary Tumor	5.64843	Stomach Adenocarcinoma
777	Primary Tumor	5.83571	Stomach Adenocarcinoma
778	Blood Derived Normal	8.40742	Stomach Adenocarcinoma
779	Primary Tumor	8.94461	Stomach Adenocarcinoma
780	Primary Tumor	4.96841	Stomach Adenocarcinoma
781	Primary Tumor	6.86016	Stomach Adenocarcinoma
782	Primary Tumor	7.89769	Stomach Adenocarcinoma
783	Primary Tumor	6.55327	Stomach Adenocarcinoma
784	Solid Tissue Normal	6.45535	Stomach Adenocarcinoma
785	Primary Tumor	7.82619	Stomach Adenocarcinoma
786	Solid Tissue Normal	5.0644	Stomach Adenocarcinoma
787	Primary Tumor	6.99235	Stomach Adenocarcinoma
788	Primary Tumor	11.2417	Stomach Adenocarcinoma
789	Primary Tumor	9.68539	Stomach Adenocarcinoma
790	Blood Derived Normal	4.12722	Stomach Adenocarcinoma
791	Blood Derived Normal	4.84146	Stomach Adenocarcinoma
792	Primary Tumor	6.82451	Stomach Adenocarcinoma
793	Primary Tumor	5.50543	Stomach Adenocarcinoma
794	Primary Tumor	5.59287	Stomach Adenocarcinoma
795	Primary Tumor	6.11735	Stomach Adenocarcinoma
796	Primary Tumor	8.55511	Stomach Adenocarcinoma
797	Primary Tumor	5.47832	Stomach Adenocarcinoma
798	Solid Tissue Normal	4.076	Stomach Adenocarcinoma
799	Primary Tumor	5.51429	Stomach Adenocarcinoma
800	Blood Derived Normal	5.70972	Stomach Adenocarcinoma
801	Primary Tumor	7.23941	Stomach Adenocarcinoma
802	Primary Tumor	8.43497	Stomach Adenocarcinoma
803	Primary Tumor	7.83682	Stomach Adenocarcinoma
804	Primary Tumor	6.27818	Stomach Adenocarcinoma
805	Primary Tumor	6.90467	Stomach Adenocarcinoma
806	Blood Derived Normal	5.52979	Stomach Adenocarcinoma
807	Primary Tumor	9.09418	Stomach Adenocarcinoma
808	Primary Tumor	5.68464	Stomach Adenocarcinoma
809	Primary Tumor	9.37813	Stomach Adenocarcinoma
810	Primary Tumor	5.59974	Stomach Adenocarcinoma
811	Blood Derived Normal	4.16266	Stomach Adenocarcinoma
812	Primary Tumor	2.77647	Stomach Adenocarcinoma
813	Blood Derived Normal	5.3212	Stomach Adenocarcinoma
814	Primary Tumor	10.7118	Stomach Adenocarcinoma
815	Solid Tissue Normal	6.41543	Stomach Adenocarcinoma
816	Primary Tumor	8.6585	Stomach Adenocarcinoma
817	Primary Tumor	5.6609	Stomach Adenocarcinoma
818	Primary Tumor	4.46044	Stomach Adenocarcinoma
819	Primary Tumor	7.54108	Stomach Adenocarcinoma
820	Blood Derived Normal	4.84967	Stomach Adenocarcinoma
821	Primary Tumor	6.90467	Stomach Adenocarcinoma
822	Solid Tissue Normal	6.4558	Stomach Adenocarcinoma
823	Primary Tumor	5.04245	Stomach Adenocarcinoma
824	Primary Tumor	5.21703	Stomach Adenocarcinoma
825	Primary Tumor	7.01015	Stomach Adenocarcinoma
826	Primary Tumor	6.73962	Stomach Adenocarcinoma
827	Primary Tumor	8.0484	Stomach Adenocarcinoma
828	Primary Tumor	10.2982	Stomach Adenocarcinoma
829	Primary Tumor	5.00453	Stomach Adenocarcinoma
830	Primary Tumor	5.31289	Stomach Adenocarcinoma
831	Primary Tumor	6.28327	Stomach Adenocarcinoma
832	Primary Tumor	6.38794	Stomach Adenocarcinoma
833	Primary Tumor	6.57864	Stomach Adenocarcinoma
834	Primary Tumor	5.34173	Stomach Adenocarcinoma
835	Primary Tumor	3.51039	Stomach Adenocarcinoma
836	Primary Tumor	5.84417	Stomach Adenocarcinoma
837	Primary Tumor	6.29537	Stomach Adenocarcinoma
838	Primary Tumor	3.42806	Stomach Adenocarcinoma
839	Primary Tumor	5.77498	Stomach Adenocarcinoma
840	Primary Tumor	4.84587	Stomach Adenocarcinoma
841	Primary Tumor	5.28285	Stomach Adenocarcinoma
842	Primary Tumor	6.16517	Stomach Adenocarcinoma
843	Primary Tumor	8.75179	Stomach Adenocarcinoma
844	Primary Tumor	6.28327	Stomach Adenocarcinoma
845	Primary Tumor	5.73181	Stomach Adenocarcinoma
846	Primary Tumor	6.8159	Stomach Adenocarcinoma
847	Blood Derived Normal	5.64633	Stomach Adenocarcinoma
848	Primary Tumor	5.97698	Stomach Adenocarcinoma
849	Primary Tumor	6.15059	Stomach Adenocarcinoma
850	Primary Tumor	3.33496	Stomach Adenocarcinoma
851	Primary Tumor	7.49532	Stomach Adenocarcinoma
852	Primary Tumor	5.71017	Stomach Adenocarcinoma
853	Primary Tumor	6.87973	Stomach Adenocarcinoma
854	Primary Tumor	5.56334	Stomach Adenocarcinoma
855	Primary Tumor	5.71512	Stomach Adenocarcinoma
856	Primary Tumor	5.75238	Stomach Adenocarcinoma
857	Solid Tissue Normal	4.17243	Stomach Adenocarcinoma
858	Primary Tumor	14.5793	Stomach Adenocarcinoma
859	Primary Tumor	5.34937	Stomach Adenocarcinoma
860	Blood Derived Normal	4.12722	Stomach Adenocarcinoma
861	Primary Tumor	6.75355	Stomach Adenocarcinoma
862	Primary Tumor	5.00093	Stomach Adenocarcinoma
863	Solid Tissue Normal	6.55632	Stomach Adenocarcinoma
864	Primary Tumor	5.95978	Stomach Adenocarcinoma
865	Primary Tumor	6.6284	Stomach Adenocarcinoma
866	Primary Tumor	7.48282	Stomach Adenocarcinoma
867	Blood Derived Normal	5.49812	Stomach Adenocarcinoma
868	Blood Derived Normal	4.97411	Stomach Adenocarcinoma
869	Primary Tumor	4.43718	Stomach Adenocarcinoma
870	Primary Tumor	7.26619	Stomach Adenocarcinoma
871	Primary Tumor	5.63598	Stomach Adenocarcinoma
872	Primary Tumor	5.65048	Stomach Adenocarcinoma
873	Primary Tumor	8.05313	Stomach Adenocarcinoma
874	Primary Tumor	5.48793	Stomach Adenocarcinoma
875	Primary Tumor	4.03518	Stomach Adenocarcinoma
876	Solid Tissue Normal	4.97845	Stomach Adenocarcinoma
877	Primary Tumor	5.75201	Stomach Adenocarcinoma
878	Primary Tumor	5.4856	Stomach Adenocarcinoma
879	Primary Tumor	3.71838	Stomach Adenocarcinoma
880	Primary Tumor	5.45732	Stomach Adenocarcinoma
881	Blood Derived Normal	5.51776	Stomach Adenocarcinoma
882	Primary Tumor	3.87987	Stomach Adenocarcinoma
883	Primary Tumor	6.19561	Stomach Adenocarcinoma
884	Primary Tumor	6.38306	Stomach Adenocarcinoma
885	Primary Tumor	6.06741	Stomach Adenocarcinoma
886	Primary Tumor	5.31555	Stomach Adenocarcinoma
887	Primary Tumor	14.0909	Stomach Adenocarcinoma
888	Primary Tumor	7.87413	Stomach Adenocarcinoma
889	Primary Tumor	6.25876	Stomach Adenocarcinoma
890	Primary Tumor	10.5605	Stomach Adenocarcinoma
891	Primary Tumor	5.63366	Stomach Adenocarcinoma
892	Solid Tissue Normal	6.50974	Stomach Adenocarcinoma
893	Primary Tumor	6.11052	Stomach Adenocarcinoma
894	Primary Tumor	12.6445	Stomach Adenocarcinoma
895	Blood Derived Normal	4.64599	Stomach Adenocarcinoma
896	Primary Tumor	5.64979	Stomach Adenocarcinoma
897	Primary Tumor	5.82088	Stomach Adenocarcinoma
898	Primary Tumor	6.2494	Stomach Adenocarcinoma
899	Blood Derived Normal	4.94659	Stomach Adenocarcinoma
900	Blood Derived Normal	4.89384	Stomach Adenocarcinoma
901	Blood Derived Normal	3.97566	Stomach Adenocarcinoma
902	Primary Tumor	3.51666	Stomach Adenocarcinoma
903	Primary Tumor	7.2275	Stomach Adenocarcinoma
904	Primary Tumor	5.49151	Stomach Adenocarcinoma
905	Primary Tumor	6.28994	Stomach Adenocarcinoma
906	Primary Tumor	3.81838	Stomach Adenocarcinoma
907	Blood Derived Normal	5.99755	Stomach Adenocarcinoma
908	Blood Derived Normal	5.12871	Stomach Adenocarcinoma
909	Primary Tumor	6.82575	Stomach Adenocarcinoma
910	Primary Tumor	5.72784	Stomach Adenocarcinoma
911	Primary Tumor	6.69577	Stomach Adenocarcinoma
912	Primary Tumor	4.66962	Stomach Adenocarcinoma
913	Primary Tumor	5.43949	Stomach Adenocarcinoma
914	Primary Tumor	5.31836	Stomach Adenocarcinoma
915	Blood Derived Normal	5.61694	Stomach Adenocarcinoma
916	Primary Tumor	8.75179	Stomach Adenocarcinoma
917	Primary Tumor	7.02181	Stomach Adenocarcinoma
918	Primary Tumor	4.5371	Stomach Adenocarcinoma
919	Blood Derived Normal	5.17585	Stomach Adenocarcinoma
920	Primary Tumor	5.71348	Stomach Adenocarcinoma
921	Primary Tumor	4.99215	Stomach Adenocarcinoma
922	Primary Tumor	5.42084	Stomach Adenocarcinoma
923	Primary Tumor	6.22781	Stomach Adenocarcinoma
924	Primary Tumor	7.70376	Stomach Adenocarcinoma
925	Primary Tumor	5.48578	Stomach Adenocarcinoma
926	Primary Tumor	5.55056	Stomach Adenocarcinoma
927	Primary Tumor	3.43417	Stomach Adenocarcinoma
928	Blood Derived Normal	5.40147	Stomach Adenocarcinoma
929	Solid Tissue Normal	7.45626	Stomach Adenocarcinoma
930	Primary Tumor	5.37656	Stomach Adenocarcinoma
931	Primary Tumor	12.6433	Stomach Adenocarcinoma
932	Primary Tumor	6.14182	Stomach Adenocarcinoma
933	Primary Tumor	5.79913	Stomach Adenocarcinoma
934	Primary Tumor	6.71728	Stomach Adenocarcinoma
935	Primary Tumor	5.8464	Stomach Adenocarcinoma
936	Primary Tumor	5.74027	Stomach Adenocarcinoma
937	Primary Tumor	9.11172	Stomach Adenocarcinoma
938	Primary Tumor	8.25471	Stomach Adenocarcinoma
939	Primary Tumor	6.28353	Stomach Adenocarcinoma
940	Primary Tumor	6.39045	Stomach Adenocarcinoma
941	Solid Tissue Normal	5.89807	Stomach Adenocarcinoma
942	Primary Tumor	6.43471	Stomach Adenocarcinoma
943	Primary Tumor	5.92294	Stomach Adenocarcinoma
944	Primary Tumor	4.83828	Stomach Adenocarcinoma
945	Primary Tumor	8.25471	Stomach Adenocarcinoma
946	Primary Tumor	5.55832	Stomach Adenocarcinoma
947	Blood Derived Normal	5.57887	Stomach Adenocarcinoma
948	Primary Tumor	8.23637	Stomach Adenocarcinoma
949	Primary Tumor	5.41247	Stomach Adenocarcinoma
950	Primary Tumor	6.90539	Stomach Adenocarcinoma
951	Primary Tumor	3.43417	Stomach Adenocarcinoma
952	Primary Tumor	6.36469	Stomach Adenocarcinoma
953	Primary Tumor	6.08185	Stomach Adenocarcinoma
954	Primary Tumor	5.42686	Stomach Adenocarcinoma
955	Primary Tumor	7.34521	Stomach Adenocarcinoma
956	Solid Tissue Normal	5.63634	Stomach Adenocarcinoma
957	Primary Tumor	8.05872	Stomach Adenocarcinoma
958	Primary Tumor	9.01413	Stomach Adenocarcinoma
959	Primary Tumor	7.16485	Stomach Adenocarcinoma
960	Primary Tumor	5.89001	Stomach Adenocarcinoma
961	Primary Tumor	5.91566	Stomach Adenocarcinoma
962	Solid Tissue Normal	5.61625	Stomach Adenocarcinoma
963	Primary Tumor	5.44649	Stomach Adenocarcinoma
964	Primary Tumor	6.83841	Stomach Adenocarcinoma
965	Primary Tumor	6.5318	Stomach Adenocarcinoma
966	Primary Tumor	13.6307	Stomach Adenocarcinoma
967	Primary Tumor	5.24971	Stomach Adenocarcinoma
968	Primary Tumor	4.84037	Stomach Adenocarcinoma
969	Primary Tumor	7.97987	Stomach Adenocarcinoma
970	Primary Tumor	5.75201	Stomach Adenocarcinoma
971	Primary Tumor	5.95836	Stomach Adenocarcinoma
972	Primary Tumor	5.80748	Stomach Adenocarcinoma
973	Primary Tumor	5.71018	Stomach Adenocarcinoma
974	Solid Tissue Normal	5.97192	Stomach Adenocarcinoma
975	Blood Derived Normal	5.33681	Stomach Adenocarcinoma
976	Primary Tumor	7.79237	Stomach Adenocarcinoma
977	Blood Derived Normal	4.86279	Stomach Adenocarcinoma
978	Primary Tumor	6.56629	Stomach Adenocarcinoma
979	Primary Tumor	7.03278	Stomach Adenocarcinoma
980	Primary Tumor	7.21635	Stomach Adenocarcinoma
981	Primary Tumor	7.04382	Stomach Adenocarcinoma
982	Primary Tumor	6.29058	Stomach Adenocarcinoma
983	Blood Derived Normal	5.04181	Stomach Adenocarcinoma
984	Primary Tumor	3.48533	Stomach Adenocarcinoma
985	Primary Tumor	13.7067	Stomach Adenocarcinoma
986	Primary Tumor	9.01859	Stomach Adenocarcinoma
987	Primary Tumor	7.54107	Stomach Adenocarcinoma
988	Blood Derived Normal	5.04978	Stomach Adenocarcinoma
989	Primary Tumor	5.37708	Stomach Adenocarcinoma
990	Primary Tumor	6.55529	Stomach Adenocarcinoma
991	Primary Tumor	6.01946	Stomach Adenocarcinoma
992	Primary Tumor	5.88675	Stomach Adenocarcinoma
993	Primary Tumor	6.69071	Stomach Adenocarcinoma
994	Primary Tumor	6.00288	Stomach Adenocarcinoma
995	Primary Tumor	6.6907	Stomach Adenocarcinoma
996	Primary Tumor	6.25676	Stomach Adenocarcinoma
997	Solid Tissue Normal	5.81637	Stomach Adenocarcinoma
998	Primary Tumor	7.12704	Stomach Adenocarcinoma
999	Primary Tumor	5.70828	Stomach Adenocarcinoma
1000	Primary Tumor	5.41828	Stomach Adenocarcinoma
1001	Primary Tumor	5.62852	Stomach Adenocarcinoma
1002	Primary Tumor	11.1445	Stomach Adenocarcinoma
1003	Primary Tumor	5.88996	Stomach Adenocarcinoma
1004	Primary Tumor	6.42269	Stomach Adenocarcinoma
1005	Blood Derived Normal	5.7024	Stomach Adenocarcinoma
1006	Primary Tumor	6.43685	Stomach Adenocarcinoma
1007	Blood Derived Normal	4.65989	Stomach Adenocarcinoma
1008	Primary Tumor	7.13179	Stomach Adenocarcinoma
1009	Primary Tumor	5.92395	Stomach Adenocarcinoma
1010	Primary Tumor	5.82302	Stomach Adenocarcinoma
1011	Primary Tumor	5.87179	Stomach Adenocarcinoma
1012	Primary Tumor	5.57736	Stomach Adenocarcinoma
1013	Primary Tumor	8.35103	Stomach Adenocarcinoma
1014	Primary Tumor	5.78086	Stomach Adenocarcinoma
1015	Blood Derived Normal	5.93707	Stomach Adenocarcinoma
1016	Primary Tumor	5.83263	Stomach Adenocarcinoma
1017	Solid Tissue Normal	5.34584	Stomach Adenocarcinoma
1018	Primary Tumor	11.0605	Stomach Adenocarcinoma
1019	Primary Tumor	6.64619	Stomach Adenocarcinoma
1020	Primary Tumor	7.72899	Stomach Adenocarcinoma
1021	Primary Tumor	6.0891	Stomach Adenocarcinoma
1022	Blood Derived Normal	4.4873	Stomach Adenocarcinoma
1023	Primary Tumor	4.73622	Stomach Adenocarcinoma
1024	Primary Tumor	5.40762	Stomach Adenocarcinoma
1025	Solid Tissue Normal	6.38079	Stomach Adenocarcinoma
1026	Primary Tumor	8.05824	Stomach Adenocarcinoma
1027	Primary Tumor	11.8441	Stomach Adenocarcinoma
1028	Primary Tumor	7.554	Stomach Adenocarcinoma
1029	Primary Tumor	5.51467	Stomach Adenocarcinoma
1030	Primary Tumor	15.1717	Stomach Adenocarcinoma
1031	Primary Tumor	13.3837	Stomach Adenocarcinoma
1032	Primary Tumor	14.3372	Stomach Adenocarcinoma
1033	Primary Tumor	5.87483	Stomach Adenocarcinoma
1034	Primary Tumor	5.40763	Stomach Adenocarcinoma
1035	Primary Tumor	3.42806	Stomach Adenocarcinoma
1036	Primary Tumor	6.01674	Stomach Adenocarcinoma
1037	Primary Tumor	7.04972	Stomach Adenocarcinoma
1038	Primary Tumor	4.97536	Stomach Adenocarcinoma
1039	Solid Tissue Normal	7.78839	Stomach Adenocarcinoma
1040	Solid Tissue Normal	6.86624	Stomach Adenocarcinoma
1041	Primary Tumor	6.17842	Stomach Adenocarcinoma
1042	Primary Tumor	8.02914	Stomach Adenocarcinoma
1043	Primary Tumor	5.57771	Stomach Adenocarcinoma
1044	Primary Tumor	6.83841	Stomach Adenocarcinoma
1045	Solid Tissue Normal	5.59663	Stomach Adenocarcinoma
1046	Primary Tumor	8.3627	Stomach Adenocarcinoma
1047	Blood Derived Normal	5.87587	Stomach Adenocarcinoma
1048	Primary Tumor	5.11002	Stomach Adenocarcinoma
1049	Primary Tumor	3.48533	Stomach Adenocarcinoma
1050	Primary Tumor	3.40774	Stomach Adenocarcinoma
1051	Primary Tumor	6.50676	Stomach Adenocarcinoma
1052	Primary Tumor	5.77761	Stomach Adenocarcinoma
1053	Primary Tumor	5.64491	Stomach Adenocarcinoma
1054	Primary Tumor	5.89316	Stomach Adenocarcinoma
1055	Primary Tumor	5.64014	Stomach Adenocarcinoma
1056	Primary Tumor	5.9446	Stomach Adenocarcinoma
1057	Solid Tissue Normal	4.96587	Stomach Adenocarcinoma
1058	Primary Tumor	5.53196	Stomach Adenocarcinoma
1059	Primary Tumor	5.6895	Stomach Adenocarcinoma
1060	Solid Tissue Normal	6.00406	Stomach Adenocarcinoma
1061	Primary Tumor	6.99221	Stomach Adenocarcinoma
1062	Primary Tumor	6.52507	Stomach Adenocarcinoma
1063	Primary Tumor	2.23045	Stomach Adenocarcinoma
1064	Primary Tumor	4.69465	Stomach Adenocarcinoma
1065	Primary Tumor	6.27459	Stomach Adenocarcinoma
1066	Primary Tumor	7.52637	Stomach Adenocarcinoma
1067	Solid Tissue Normal	5.1044	Stomach Adenocarcinoma
1068	Primary Tumor	6.32074	Stomach Adenocarcinoma
1069	Primary Tumor	6.33286	Stomach Adenocarcinoma
1070	Primary Tumor	7.12274	Stomach Adenocarcinoma
1071	Primary Tumor	7.58335	Stomach Adenocarcinoma
1072	Primary Tumor	5.92666	Stomach Adenocarcinoma
1073	Primary Tumor	6.27313	Stomach Adenocarcinoma
1074	Primary Tumor	5.33846	Stomach Adenocarcinoma
1075	Primary Tumor	6.83878	Stomach Adenocarcinoma
1076	Primary Tumor	5.6355	Stomach Adenocarcinoma
1077	Primary Tumor	8.45361	Stomach Adenocarcinoma
1078	Primary Tumor	7.00951	Stomach Adenocarcinoma
1079	Blood Derived Normal	5.91868	Stomach Adenocarcinoma
1080	Primary Tumor	5.62301	Colon Adenocarcinoma
1081	Primary Tumor	5.43054	Colon Adenocarcinoma
1082	Primary Tumor	7.2657	Colon Adenocarcinoma
1083	Primary Tumor	11.644	Colon Adenocarcinoma
1084	Primary Tumor	9.10367	Colon Adenocarcinoma
1085	Primary Tumor	6.1799	Colon Adenocarcinoma
1086	Primary Tumor	8.42666	Colon Adenocarcinoma
1087	Primary Tumor	5.28438	Colon Adenocarcinoma
1088	Primary Tumor	7.95019	Colon Adenocarcinoma
1089	Blood Derived Normal	6.19319	Colon Adenocarcinoma
1090	Primary Tumor	13.205	Colon Adenocarcinoma
1091	Primary Tumor	6.71608	Colon Adenocarcinoma
1092	Solid Tissue Normal	15.1162	Colon Adenocarcinoma
1093	Primary Tumor	7.14328	Colon Adenocarcinoma
1094	Primary Tumor	5.70617	Colon Adenocarcinoma
1095	Blood Derived Normal	4.57409	Colon Adenocarcinoma
1096	Primary Tumor	9.1482	Colon Adenocarcinoma
1097	Primary Tumor	9.62729	Colon Adenocarcinoma
1098	Primary Tumor	5.66672	Colon Adenocarcinoma
1099	Primary Tumor	6.69607	Colon Adenocarcinoma
1100	Primary Tumor	11.2432	Colon Adenocarcinoma
1101	Blood Derived Normal	4.95145	Colon Adenocarcinoma
1102	Primary Tumor	5.27575	Colon Adenocarcinoma
1103	Primary Tumor	10.1422	Colon Adenocarcinoma
1104	Solid Tissue Normal	6.41313	Colon Adenocarcinoma
1105	Primary Tumor	16.884	Colon Adenocarcinoma
1106	Primary Tumor	10.184	Colon Adenocarcinoma
1107	Primary Tumor	6.25332	Colon Adenocarcinoma
1108	Primary Tumor	8.47324	Colon Adenocarcinoma
1109	Primary Tumor	6.55586	Colon Adenocarcinoma
1110	Blood Derived Normal	5.16743	Colon Adenocarcinoma
1111	Primary Tumor	6.55924	Colon Adenocarcinoma
1112	Primary Tumor	5.18104	Colon Adenocarcinoma
1113	Primary Tumor	5.74053	Colon Adenocarcinoma
1114	Primary Tumor	6.73763	Colon Adenocarcinoma
1115	Primary Tumor	8.17122	Colon Adenocarcinoma
1116	Primary Tumor	4.478	Colon Adenocarcinoma
1117	Primary Tumor	6.48087	Colon Adenocarcinoma
1118	Primary Tumor	10.2351	Colon Adenocarcinoma
1119	Primary Tumor	4.95949	Colon Adenocarcinoma
1120	Primary Tumor	8.39698	Colon Adenocarcinoma
1121	Primary Tumor	7.58647	Colon Adenocarcinoma
1122	Primary Tumor	7.07235	Colon Adenocarcinoma
1123	Blood Derived Normal	5.06654	Colon Adenocarcinoma
1124	Primary Tumor	7.33966	Colon Adenocarcinoma
1125	Blood Derived Normal	3.11533	Colon Adenocarcinoma
1126	Primary Tumor	11.4182	Colon Adenocarcinoma
1127	Primary Tumor	7.84993	Colon Adenocarcinoma
1128	Primary Tumor	13.47	Colon Adenocarcinoma
1129	Primary Tumor	3.20787	Colon Adenocarcinoma
1130	Primary Tumor	6.1307	Colon Adenocarcinoma
1131	Primary Tumor	6.64573	Colon Adenocarcinoma
1132	Primary Tumor	6.62924	Colon Adenocarcinoma
1133	Solid Tissue Normal	5.19969	Colon Adenocarcinoma
1134	Blood Derived Normal	6.90589	Colon Adenocarcinoma
1135	Primary Tumor	7.06287	Colon Adenocarcinoma
1136	Primary Tumor	5.24184	Colon Adenocarcinoma
1137	Blood Derived Normal	5.4465	Colon Adenocarcinoma
1138	Primary Tumor	7.55659	Colon Adenocarcinoma
1139	Primary Tumor	7.35821	Colon Adenocarcinoma
1140	Solid Tissue Normal	7.20383	Colon Adenocarcinoma
1141	Primary Tumor	7.5897	Colon Adenocarcinoma
1142	Primary Tumor	5.8239	Colon Adenocarcinoma
1143	Primary Tumor	10.7353	Colon Adenocarcinoma
1144	Primary Tumor	5.15779	Colon Adenocarcinoma
1145	Primary Tumor	11.9076	Colon Adenocarcinoma
1146	Primary Tumor	7.96323	Colon Adenocarcinoma
1147	Primary Tumor	5.77309	Colon Adenocarcinoma
1148	Primary Tumor	4.85298	Colon Adenocarcinoma
1149	Primary Tumor	9.41042	Colon Adenocarcinoma
1150	Primary Tumor	15.0194	Colon Adenocarcinoma
1151	Blood Derived Normal	4.80997	Colon Adenocarcinoma
1152	Primary Tumor	5.80547	Colon Adenocarcinoma
1153	Primary Tumor	17.9578	Colon Adenocarcinoma
1154	Primary Tumor	7.38086	Colon Adenocarcinoma
1155	Primary Tumor	5.63978	Colon Adenocarcinoma
1156	Solid Tissue Normal	5.84969	Colon Adenocarcinoma
1157	Primary Tumor	7.51129	Colon Adenocarcinoma
1158	Primary Tumor	10.5531	Colon Adenocarcinoma
1159	Primary Tumor	2.55115	Colon Adenocarcinoma
1160	Primary Tumor	7.92984	Colon Adenocarcinoma
1161	Primary Tumor	5.44597	Colon Adenocarcinoma
1162	Primary Tumor	7.42953	Colon Adenocarcinoma
1163	Primary Tumor	6.18532	Colon Adenocarcinoma
1164	Primary Tumor	9.38206	Colon Adenocarcinoma
1165	Primary Tumor	6.46813	Colon Adenocarcinoma
1166	Primary Tumor	12.9534	Colon Adenocarcinoma
1167	Primary Tumor	6.32118	Colon Adenocarcinoma
1168	Primary Tumor	5.99685	Colon Adenocarcinoma
1169	Primary Tumor	9.19159	Colon Adenocarcinoma
1170	Primary Tumor	12.2533	Colon Adenocarcinoma
1171	Primary Tumor	11.7222	Colon Adenocarcinoma
1172	Primary Tumor	8.06131	Colon Adenocarcinoma
1173	Solid Tissue Normal	15.1562	Colon Adenocarcinoma
1174	Primary Tumor	11.6632	Colon Adenocarcinoma
1175	Primary Tumor	5.9483	Colon Adenocarcinoma
1176	Primary Tumor	6.29409	Colon Adenocarcinoma
1177	Primary Tumor	6.52831	Colon Adenocarcinoma
1178	Solid Tissue Normal	12.8108	Colon Adenocarcinoma
1179	Primary Tumor	4.54663	Colon Adenocarcinoma
1180	Solid Tissue Normal	3.82558	Colon Adenocarcinoma
1181	Primary Tumor	5.69586	Colon Adenocarcinoma
1182	Primary Tumor	5.88025	Colon Adenocarcinoma
1183	Primary Tumor	6.63999	Colon Adenocarcinoma
1184	Primary Tumor	11.4691	Colon Adenocarcinoma
1185	Primary Tumor	6.50127	Colon Adenocarcinoma
1186	Primary Tumor	6.55081	Colon Adenocarcinoma
1187	Primary Tumor	6.10252	Colon Adenocarcinoma
1188	Primary Tumor	5.32615	Colon Adenocarcinoma
1189	Primary Tumor	8.14482	Colon Adenocarcinoma
1190	Primary Tumor	6.93365	Colon Adenocarcinoma
1191	Primary Tumor	6.43654	Colon Adenocarcinoma
1192	Primary Tumor	5.58376	Colon Adenocarcinoma
1193	Primary Tumor	7.72475	Colon Adenocarcinoma
1194	Primary Tumor	5.82697	Colon Adenocarcinoma
1195	Solid Tissue Normal	4.94181	Colon Adenocarcinoma
1196	Primary Tumor	10.8854	Colon Adenocarcinoma
1197	Primary Tumor	6.03916	Colon Adenocarcinoma
1198	Blood Derived Normal	7.19662	Colon Adenocarcinoma
1199	Primary Tumor	9.91968	Colon Adenocarcinoma
1200	Blood Derived Normal	5.98043	Colon Adenocarcinoma
1201	Primary Tumor	4.14396	Colon Adenocarcinoma
1202	Primary Tumor	11.4317	Colon Adenocarcinoma
1203	Primary Tumor	12.3937	Colon Adenocarcinoma
1204	Blood Derived Normal	5.56529	Colon Adenocarcinoma
1205	Blood Derived Normal	5.69454	Colon Adenocarcinoma
1206	Primary Tumor	9.80665	Colon Adenocarcinoma
1207	Primary Tumor	6.25572	Colon Adenocarcinoma
1208	Primary Tumor	6.15204	Colon Adenocarcinoma
1209	Primary Tumor	5.8155	Colon Adenocarcinoma
1210	Primary Tumor	7.05419	Colon Adenocarcinoma
1211	Primary Tumor	6.20988	Colon Adenocarcinoma
1212	Blood Derived Normal	6.34761	Colon Adenocarcinoma
1213	Primary Tumor	6.04371	Colon Adenocarcinoma
1214	Primary Tumor	6.17672	Colon Adenocarcinoma
1215	Primary Tumor	5.90206	Colon Adenocarcinoma
1216	Primary Tumor	9.3501	Colon Adenocarcinoma
1217	Primary Tumor	10.3003	Colon Adenocarcinoma
1218	Solid Tissue Normal	8.14518	Colon Adenocarcinoma
1219	Primary Tumor	6.16135	Colon Adenocarcinoma
1220	Primary Tumor	11.0748	Colon Adenocarcinoma
1221	Primary Tumor	9.28397	Colon Adenocarcinoma
1222	Primary Tumor	5.67198	Colon Adenocarcinoma
1223	Primary Tumor	8.79445	Colon Adenocarcinoma
1224	Primary Tumor	5.74984	Colon Adenocarcinoma
1225	Primary Tumor	17.4783	Colon Adenocarcinoma
1226	Primary Tumor	11.8749	Colon Adenocarcinoma
1227	Blood Derived Normal	5.70364	Colon Adenocarcinoma
1228	Primary Tumor	7.71228	Colon Adenocarcinoma
1229	Primary Tumor	10.9164	Colon Adenocarcinoma
1230	Primary Tumor	8.01358	Colon Adenocarcinoma
1231	Primary Tumor	3.69916	Colon Adenocarcinoma
1232	Primary Tumor	5.0643	Colon Adenocarcinoma
1233	Primary Tumor	4.96148	Colon Adenocarcinoma
1234	Primary Tumor	7.84157	Colon Adenocarcinoma
1235	Solid Tissue Normal	4.31066	Colon Adenocarcinoma
1236	Primary Tumor	5.91949	Colon Adenocarcinoma
1237	Primary Tumor	4.89725	Colon Adenocarcinoma
1238	Blood Derived Normal	4.7007	Colon Adenocarcinoma
1239	Primary Tumor	6.79203	Colon Adenocarcinoma
1240	Primary Tumor	7.80422	Colon Adenocarcinoma
1241	Primary Tumor	8.92423	Colon Adenocarcinoma
1242	Primary Tumor	8.91078	Colon Adenocarcinoma
1243	Primary Tumor	12.65	Colon Adenocarcinoma
1244	Primary Tumor	5.21693	Colon Adenocarcinoma
1245	Blood Derived Normal	6.07085	Colon Adenocarcinoma
1246	Primary Tumor	10.5085	Colon Adenocarcinoma
1247	Primary Tumor	10.5452	Colon Adenocarcinoma
1248	Primary Tumor	6.26857	Colon Adenocarcinoma
1249	Primary Tumor	6.36685	Colon Adenocarcinoma
1250	Primary Tumor	13.4641	Colon Adenocarcinoma
1251	Primary Tumor	4.76184	Colon Adenocarcinoma
1252	Primary Tumor	6.08405	Colon Adenocarcinoma
1253	Primary Tumor	9.65879	Colon Adenocarcinoma
1254	Primary Tumor	8.94393	Colon Adenocarcinoma
1255	Primary Tumor	7.40547	Colon Adenocarcinoma
1256	Primary Tumor	5.62157	Colon Adenocarcinoma
1257	Primary Tumor	5.48794	Colon Adenocarcinoma
1258	Primary Tumor	10.8129	Colon Adenocarcinoma
1259	Primary Tumor	7.07816	Colon Adenocarcinoma
1260	Primary Tumor	5.77617	Colon Adenocarcinoma
1261	Primary Tumor	5.3804	Colon Adenocarcinoma
1262	Primary Tumor	7.42251	Colon Adenocarcinoma
1263	Primary Tumor	6.48262	Colon Adenocarcinoma
1264	Primary Tumor	8.36998	Colon Adenocarcinoma
1265	Primary Tumor	6.10166	Colon Adenocarcinoma
1266	Primary Tumor	6.77141	Colon Adenocarcinoma
1267	Primary Tumor	6.7952	Colon Adenocarcinoma
1268	Primary Tumor	15.8274	Colon Adenocarcinoma
1269	Primary Tumor	6.01533	Colon Adenocarcinoma
1270	Primary Tumor	5.88079	Colon Adenocarcinoma
1271	Primary Tumor	4.4817	Colon Adenocarcinoma
1272	Primary Tumor	6.78497	Colon Adenocarcinoma
1273	Primary Tumor	8.45093	Colon Adenocarcinoma
1274	Primary Tumor	5.25026	Colon Adenocarcinoma
1275	Primary Tumor	15.5473	Colon Adenocarcinoma
1276	Primary Tumor	6.56125	Colon Adenocarcinoma
1277	Primary Tumor	11.2919	Colon Adenocarcinoma
1278	Primary Tumor	20.9347	Colon Adenocarcinoma
1279	Primary Tumor	9.36186	Colon Adenocarcinoma
1280	Primary Tumor	7.59346	Colon Adenocarcinoma
1281	Primary Tumor	11.4835	Colon Adenocarcinoma
1282	Primary Tumor	5.38526	Colon Adenocarcinoma
1283	Primary Tumor	5.75234	Colon Adenocarcinoma
1284	Primary Tumor	7.28622	Colon Adenocarcinoma
1285	Primary Tumor	5.7731	Colon Adenocarcinoma
1286	Solid Tissue Normal	5.8699	Colon Adenocarcinoma
1287	Primary Tumor	9.14541	Colon Adenocarcinoma
1288	Primary Tumor	9.74051	Colon Adenocarcinoma
1289	Solid Tissue Normal	4.39581	Colon Adenocarcinoma
1290	Primary Tumor	8.20253	Colon Adenocarcinoma
1291	Primary Tumor	6.86504	Colon Adenocarcinoma
1292	Primary Tumor	5.20631	Colon Adenocarcinoma
1293	Solid Tissue Normal	5.19537	Colon Adenocarcinoma
1294	Primary Tumor	6.65086	Colon Adenocarcinoma
1295	Primary Tumor	3.32804	Colon Adenocarcinoma
1296	Primary Tumor	9.14991	Colon Adenocarcinoma
1297	Primary Tumor	11.3703	Colon Adenocarcinoma
1298	Primary Tumor	6.70988	Colon Adenocarcinoma
1299	Primary Tumor	6.09899	Colon Adenocarcinoma
1300	Primary Tumor	5.08453	Colon Adenocarcinoma
1301	Primary Tumor	7.52477	Colon Adenocarcinoma
1302	Primary Tumor	9.42868	Colon Adenocarcinoma
1303	Primary Tumor	7.57462	Colon Adenocarcinoma
1304	Solid Tissue Normal	6.53012	Colon Adenocarcinoma
1305	Primary Tumor	5.48071	Colon Adenocarcinoma
1306	Primary Tumor	7.81766	Colon Adenocarcinoma
1307	Primary Tumor	6.51697	Colon Adenocarcinoma
1308	Primary Tumor	6.12033	Colon Adenocarcinoma
1309	Primary Tumor	9.54191	Colon Adenocarcinoma
1310	Primary Tumor	7.07359	Colon Adenocarcinoma
1311	Primary Tumor	4.70464	Colon Adenocarcinoma
1312	Primary Tumor	5.98448	Colon Adenocarcinoma
1313	Solid Tissue Normal	4.56617	Colon Adenocarcinoma
1314	Blood Derived Normal	5.52465	Colon Adenocarcinoma
1315	Primary Tumor	14.2569	Colon Adenocarcinoma
1316	Primary Tumor	11.1705	Colon Adenocarcinoma
1317	Blood Derived Normal	4.79781	Colon Adenocarcinoma
1318	Blood Derived Normal	5.61605	Colon Adenocarcinoma
1319	Blood Derived Normal	4.56264	Colon Adenocarcinoma
1320	Primary Tumor	10.1832	Colon Adenocarcinoma
1321	Primary Tumor	10.2871	Colon Adenocarcinoma
1322	Primary Tumor	11.2986	Colon Adenocarcinoma
1323	Primary Tumor	17.1118	Colon Adenocarcinoma
1324	Blood Derived Normal	7.32511	Colon Adenocarcinoma
1325	Primary Tumor	10.2164	Colon Adenocarcinoma
1326	Primary Tumor	7.09334	Colon Adenocarcinoma
1327	Primary Tumor	7.19738	Colon Adenocarcinoma
1328	Primary Tumor	8.72347	Colon Adenocarcinoma
1329	Solid Tissue Normal	6.60631	Colon Adenocarcinoma
1330	Primary Tumor	9.03663	Colon Adenocarcinoma
1331	Blood Derived Normal	5.53934	Colon Adenocarcinoma
1332	Solid Tissue Normal	3.37019	Colon Adenocarcinoma
1333	Primary Tumor	6.95368	Colon Adenocarcinoma
1334	Primary Tumor	6.06513	Colon Adenocarcinoma
1335	Primary Tumor	6.16256	Colon Adenocarcinoma
1336	Primary Tumor	7.23706	Colon Adenocarcinoma
1337	Primary Tumor	3.61012	Colon Adenocarcinoma
1338	Primary Tumor	7.4395	Colon Adenocarcinoma
1339	Solid Tissue Normal	6.19228	Colon Adenocarcinoma
1340	Blood Derived Normal	4.38395	Colon Adenocarcinoma
1341	Primary Tumor	11.3737	Colon Adenocarcinoma
1342	Primary Tumor	5.57845	Colon Adenocarcinoma
1343	Solid Tissue Normal	7.02172	Colon Adenocarcinoma
1344	Primary Tumor	6.57687	Colon Adenocarcinoma
1345	Primary Tumor	10.7972	Colon Adenocarcinoma
1346	Solid Tissue Normal	10.214	Colon Adenocarcinoma
1347	Primary Tumor	5.59995	Colon Adenocarcinoma
1348	Primary Tumor	4.89223	Colon Adenocarcinoma
1349	Primary Tumor	5.09193	Colon Adenocarcinoma
1350	Primary Tumor	10.1592	Colon Adenocarcinoma
1351	Primary Tumor	5.48633	Colon Adenocarcinoma
1352	Primary Tumor	7.13425	Colon Adenocarcinoma
1353	Primary Tumor	6.66505	Colon Adenocarcinoma
1354	Primary Tumor	6.07256	Colon Adenocarcinoma
1355	Primary Tumor	9.3472	Colon Adenocarcinoma
1356	Primary Tumor	5.92572	Colon Adenocarcinoma
1357	Primary Tumor	10.6327	Colon Adenocarcinoma
1358	Primary Tumor	5.73337	Colon Adenocarcinoma
1359	Primary Tumor	4.59938	Colon Adenocarcinoma
1360	Primary Tumor	5.01007	Colon Adenocarcinoma
1361	Solid Tissue Normal	7.08801	Colon Adenocarcinoma
1362	Primary Tumor	5.38935	Colon Adenocarcinoma
1363	Primary Tumor	5.46563	Colon Adenocarcinoma
1364	Primary Tumor	5.94636	Colon Adenocarcinoma
1365	Solid Tissue Normal	9.03206	Colon Adenocarcinoma
1366	Blood Derived Normal	6.79034	Colon Adenocarcinoma
1367	Primary Tumor	7.59229	Colon Adenocarcinoma
1368	Primary Tumor	5.28354	Colon Adenocarcinoma
1369	Primary Tumor	6.01016	Colon Adenocarcinoma
1370	Primary Tumor	6.76294	Colon Adenocarcinoma
1371	Primary Tumor	5.56376	Colon Adenocarcinoma
1372	Primary Tumor	15.7815	Colon Adenocarcinoma
1373	Primary Tumor	4.53849	Colon Adenocarcinoma
1374	Primary Tumor	4.97456	Colon Adenocarcinoma
1375	Primary Tumor	5.62254	Colon Adenocarcinoma
1376	Primary Tumor	8.11951	Colon Adenocarcinoma
1377	Primary Tumor	9.28773	Colon Adenocarcinoma
1378	Primary Tumor	2.72308	Colon Adenocarcinoma
1379	Primary Tumor	4.10742	Colon Adenocarcinoma
1380	Primary Tumor	7.44839	Colon Adenocarcinoma
1381	Primary Tumor	5.65607	Colon Adenocarcinoma
1382	Primary Tumor	6.35263	Colon Adenocarcinoma
1383	Primary Tumor	7.89649	Colon Adenocarcinoma
1384	Primary Tumor	5.57838	Colon Adenocarcinoma
1385	Primary Tumor	6.80002	Colon Adenocarcinoma
1386	Solid Tissue Normal	4.49809	Colon Adenocarcinoma
1387	Primary Tumor	11.121	Colon Adenocarcinoma
1388	Primary Tumor	4.92735	Colon Adenocarcinoma
1389	Primary Tumor	10.3894	Colon Adenocarcinoma
1390	Primary Tumor	7.60408	Colon Adenocarcinoma
1391	Primary Tumor	8.5384	Colon Adenocarcinoma
1392	Primary Tumor	12.7585	Colon Adenocarcinoma
1393	Blood Derived Normal	5.72871	Colon Adenocarcinoma
1394	Primary Tumor	15.5408	Colon Adenocarcinoma
1395	Primary Tumor	9.1075	Colon Adenocarcinoma
1396	Solid Tissue Normal	7.87702	Colon Adenocarcinoma
1397	Primary Tumor	5.4466	Colon Adenocarcinoma
1398	Primary Tumor	5.53454	Colon Adenocarcinoma
1399	Primary Tumor	6.67865	Colon Adenocarcinoma
1400	Primary Tumor	5.62971	Colon Adenocarcinoma
1401	Primary Tumor	10.9716	Colon Adenocarcinoma
1402	Primary Tumor	10.2095	Colon Adenocarcinoma
1403	Primary Tumor	5.09578	Colon Adenocarcinoma
1404	Primary Tumor	8.57066	Colon Adenocarcinoma
1405	Primary Tumor	7.15941	Colon Adenocarcinoma
1406	Primary Tumor	8.46622	Colon Adenocarcinoma
1407	Primary Tumor	5.09606	Colon Adenocarcinoma
1408	Primary Tumor	11.2434	Colon Adenocarcinoma
1409	Primary Tumor	12.2013	Colon Adenocarcinoma
1410	Primary Tumor	5.08073	Colon Adenocarcinoma
1411	Primary Tumor	7.86955	Colon Adenocarcinoma
1412	Primary Tumor	4.75415	Colon Adenocarcinoma
1413	Primary Tumor	6.1676	Colon Adenocarcinoma
1414	Primary Tumor	7.38321	Colon Adenocarcinoma
1415	Primary Tumor	6.59356	Colon Adenocarcinoma
1416	Primary Tumor	4.90764	Colon Adenocarcinoma
1417	Primary Tumor	10.7809	Colon Adenocarcinoma
1418	Primary Tumor	10.3044	Colon Adenocarcinoma
1419	Primary Tumor	4.98824	Colon Adenocarcinoma
1420	Primary Tumor	7.96101	Colon Adenocarcinoma
1421	Primary Tumor	3.79767	Colon Adenocarcinoma
1422	Primary Tumor	7.7172	Colon Adenocarcinoma
1423	Solid Tissue Normal	6.30238	Colon Adenocarcinoma
1424	Blood Derived Normal	5.28449	Colon Adenocarcinoma
1425	Primary Tumor	4.58316	Colon Adenocarcinoma
1426	Solid Tissue Normal	3.07971	Colon Adenocarcinoma
1427	Primary Tumor	11.385	Colon Adenocarcinoma
1428	Primary Tumor	14.1792	Colon Adenocarcinoma
1429	Primary Tumor	9.5758	Colon Adenocarcinoma
1430	Primary Tumor	6.63669	Colon Adenocarcinoma
1431	Primary Tumor	6.71825	Colon Adenocarcinoma
1432	Primary Tumor	5.90747	Colon Adenocarcinoma
1433	Primary Tumor	6.51462	Colon Adenocarcinoma
1434	Primary Tumor	5.63056	Colon Adenocarcinoma
1435	Primary Tumor	5.27278	Colon Adenocarcinoma
1436	Primary Tumor	5.32736	Colon Adenocarcinoma
1437	Primary Tumor	10.0564	Colon Adenocarcinoma
1438	Primary Tumor	10.1397	Colon Adenocarcinoma
1439	Primary Tumor	6.28099	Colon Adenocarcinoma
1440	Primary Tumor	12.0944	Colon Adenocarcinoma
1441	Primary Tumor	10.7007	Colon Adenocarcinoma
1442	Solid Tissue Normal	5.48054	Colon Adenocarcinoma
1443	Primary Tumor	9.25827	Colon Adenocarcinoma
1444	Primary Tumor	6.88609	Colon Adenocarcinoma
1445	Primary Tumor	10.6704	Colon Adenocarcinoma
1446	Primary Tumor	11.2909	Colon Adenocarcinoma
1447	Blood Derived Normal	5.49162	Colon Adenocarcinoma
1448	Primary Tumor	4.92427	Colon Adenocarcinoma
1449	Primary Tumor	13.1516	Colon Adenocarcinoma
1450	Primary Tumor	6.07776	Colon Adenocarcinoma
1451	Primary Tumor	6.98215	Colon Adenocarcinoma
1452	Blood Derived Normal	4.05188	Colon Adenocarcinoma
1453	Primary Tumor	6.95151	Colon Adenocarcinoma
1454	Primary Tumor	6.51694	Colon Adenocarcinoma
1455	Blood Derived Normal	3.92043	Colon Adenocarcinoma
1456	Solid Tissue Normal	5.56293	Colon Adenocarcinoma
1457	Primary Tumor	7.62241	Colon Adenocarcinoma
1458	Primary Tumor	7.12027	Colon Adenocarcinoma
1459	Primary Tumor	7.22308	Colon Adenocarcinoma
1460	Primary Tumor	5.28196	Colon Adenocarcinoma
1461	Primary Tumor	9.11829	Colon Adenocarcinoma
1462	Primary Tumor	7.25541	Colon Adenocarcinoma
1463	Primary Tumor	6.37711	Colon Adenocarcinoma
1464	Primary Tumor	6.184	Colon Adenocarcinoma
1465	Primary Tumor	6.22933	Colon Adenocarcinoma
1466	Primary Tumor	5.31361	Colon Adenocarcinoma
1467	Primary Tumor	8.74992	Colon Adenocarcinoma
1468	Primary Tumor	14.0158	Colon Adenocarcinoma
1469	Primary Tumor	7.33081	Colon Adenocarcinoma
1470	Primary Tumor	9.53713	Colon Adenocarcinoma
1471	Primary Tumor	5.94034	Colon Adenocarcinoma
1472	Primary Tumor	10.1415	Colon Adenocarcinoma
1473	Blood Derived Normal	6.23936	Colon Adenocarcinoma
1474	Blood Derived Normal	4.62861	Colon Adenocarcinoma
1475	Primary Tumor	4.27051	Colon Adenocarcinoma
1476	Blood Derived Normal	5.4029	Colon Adenocarcinoma
1477	Primary Tumor	7.09651	Colon Adenocarcinoma
1478	Blood Derived Normal	7.25134	Colon Adenocarcinoma
1479	Solid Tissue Normal	5.95699	Colon Adenocarcinoma
1480	Primary Tumor	5.67689	Colon Adenocarcinoma
1481	Primary Tumor	9.36945	Colon Adenocarcinoma
1482	Primary Tumor	6.77278	Colon Adenocarcinoma
1483	Primary Tumor	6.27253	Colon Adenocarcinoma
1484	Primary Tumor	13.7227	Colon Adenocarcinoma
1485	Primary Tumor	7.62259	Colon Adenocarcinoma
1486	Blood Derived Normal	6.84388	Colon Adenocarcinoma
1487	Primary Tumor	8.55623	Colon Adenocarcinoma
1488	Primary Tumor	8.5463	Colon Adenocarcinoma
1489	Blood Derived Normal	4.93399	Colon Adenocarcinoma
1490	Blood Derived Normal	5.76675	Colon Adenocarcinoma
1491	Primary Tumor	4.99564	Colon Adenocarcinoma
1492	Primary Tumor	6.70181	Colon Adenocarcinoma
1493	Primary Tumor	5.01668	Colon Adenocarcinoma
1494	Primary Tumor	5.81184	Colon Adenocarcinoma
1495	Primary Tumor	5.97863	Colon Adenocarcinoma
1496	Primary Tumor	7.27605	Colon Adenocarcinoma
1497	Primary Tumor	9.42684	Colon Adenocarcinoma
1498	Primary Tumor	6.11515	Colon Adenocarcinoma
1499	Primary Tumor	7.07452	Colon Adenocarcinoma
1500	Primary Tumor	6.53109	Colon Adenocarcinoma
1501	Primary Tumor	5.65159	Colon Adenocarcinoma
1502	Primary Tumor	4.46011	Colon Adenocarcinoma
1503	Primary Tumor	10.6493	Colon Adenocarcinoma
1504	Primary Tumor	11.361	Colon Adenocarcinoma
1505	Primary Tumor	6.03314	Colon Adenocarcinoma
1506	Primary Tumor	9.55612	Colon Adenocarcinoma
1507	Solid Tissue Normal	4.79601	Colon Adenocarcinoma
1508	Solid Tissue Normal	5.58758	Colon Adenocarcinoma
1509	Primary Tumor	4.43934	Colon Adenocarcinoma
1510	Primary Tumor	4.37577	Colon Adenocarcinoma
1511	Blood Derived Normal	4.9623	Colon Adenocarcinoma
1512	Solid Tissue Normal	6.27492	Colon Adenocarcinoma
1513	Primary Tumor	8.60759	Colon Adenocarcinoma
1514	Blood Derived Normal	4.60958	Colon Adenocarcinoma
1515	Primary Tumor	6.2375	Colon Adenocarcinoma
1516	Primary Tumor	6.56512	Colon Adenocarcinoma
1517	Blood Derived Normal	4.55675	Colon Adenocarcinoma
1518	Primary Tumor	6.06916	Colon Adenocarcinoma
1519	Primary Tumor	5.90615	Colon Adenocarcinoma
1520	Primary Tumor	10.185	Colon Adenocarcinoma
1521	Primary Tumor	6.37401	Colon Adenocarcinoma
1522	Primary Tumor	4.82123	Colon Adenocarcinoma
1523	Primary Tumor	7.49596	Colon Adenocarcinoma
1524	Blood Derived Normal	7.0058	Colon Adenocarcinoma
1525	Primary Tumor	8.32203	Colon Adenocarcinoma
1526	Primary Tumor	11.9394	Colon Adenocarcinoma
1527	Primary Tumor	3.7952	Colon Adenocarcinoma
1528	Primary Tumor	8.55207	Colon Adenocarcinoma
1529	Solid Tissue Normal	7.01326	Colon Adenocarcinoma
1530	Primary Tumor	4.95289	Colon Adenocarcinoma
1531	Primary Tumor	6.77194	Colon Adenocarcinoma
1532	Solid Tissue Normal	5.78119	Colon Adenocarcinoma
1533	Primary Tumor	6.16466	Colon Adenocarcinoma
1534	Primary Tumor	4.89905	Colon Adenocarcinoma
1535	Blood Derived Normal	5.01699	Colon Adenocarcinoma
1536	Primary Tumor	10.6378	Colon Adenocarcinoma
1537	Primary Tumor	6.99146	Colon Adenocarcinoma
1538	Primary Tumor	6.95845	Colon Adenocarcinoma
1539	Primary Tumor	6.10056	Colon Adenocarcinoma
1540	Primary Tumor	4.99303	Colon Adenocarcinoma
1541	Primary Tumor	10.3604	Colon Adenocarcinoma
1542	Primary Tumor	12.6483	Colon Adenocarcinoma
1543	Blood Derived Normal	5.7263	Colon Adenocarcinoma
1544	Primary Tumor	5.91262	Colon Adenocarcinoma
1545	Primary Tumor	5.86437	Colon Adenocarcinoma
1546	Primary Tumor	5.89774	Colon Adenocarcinoma
1547	Primary Tumor	6.85694	Colon Adenocarcinoma
1548	Primary Tumor	12.7472	Colon Adenocarcinoma
1549	Primary Tumor	6.7667	Colon Adenocarcinoma
1550	Primary Tumor	5.30346	Colon Adenocarcinoma
1551	Primary Tumor	5.8204	Colon Adenocarcinoma
1552	Primary Tumor	6.12258	Colon Adenocarcinoma
1553	Primary Tumor	8.75544	Colon Adenocarcinoma
1554	Blood Derived Normal	5.64634	Colon Adenocarcinoma
1555	Primary Tumor	5.11851	Colon Adenocarcinoma
1556	Blood Derived Normal	4.67827	Colon Adenocarcinoma
1557	Primary Tumor	6.28258	Colon Adenocarcinoma
1558	Primary Tumor	8.22163	Colon Adenocarcinoma
1559	Primary Tumor	9.15408	Colon Adenocarcinoma
1560	Primary Tumor	5.26731	Colon Adenocarcinoma
1561	Primary Tumor	12.2654	Colon Adenocarcinoma
1562	Primary Tumor	6.47662	Colon Adenocarcinoma
1563	Primary Tumor	10.2818	Colon Adenocarcinoma
1564	Primary Tumor	7.91859	Colon Adenocarcinoma
1565	Primary Tumor	5.13	Colon Adenocarcinoma
1566	Primary Tumor	7.34821	Colon Adenocarcinoma
1567	Primary Tumor	5.52776	Colon Adenocarcinoma
1568	Primary Tumor	6.20735	Colon Adenocarcinoma
1569	Primary Tumor	10.7011	Colon Adenocarcinoma
1570	Primary Tumor	7.25704	Colon Adenocarcinoma
1571	Blood Derived Normal	4.86185	Colon Adenocarcinoma
1572	Primary Tumor	10.859	Colon Adenocarcinoma
1573	Primary Tumor	5.85251	Colon Adenocarcinoma
1574	Primary Tumor	12.8352	Colon Adenocarcinoma
1575	Primary Tumor	10.1045	Colon Adenocarcinoma
1576	Primary Tumor	5.82444	Colon Adenocarcinoma
1577	Primary Tumor	6.7361	Colon Adenocarcinoma
1578	Primary Tumor	6.68949	Colon Adenocarcinoma
1579	Blood Derived Normal	5.72315	Colon Adenocarcinoma
1580	Blood Derived Normal	4.50062	Colon Adenocarcinoma
1581	Primary Tumor	6.38406	Colon Adenocarcinoma
1582	Primary Tumor	5.70784	Colon Adenocarcinoma
1583	Blood Derived Normal	4.10241	Colon Adenocarcinoma
1584	Blood Derived Normal	5.43539	Colon Adenocarcinoma
1585	Primary Tumor	4.93264	Colon Adenocarcinoma
1586	Primary Tumor	5.39731	Colon Adenocarcinoma
1587	Primary Tumor	10.2851	Colon Adenocarcinoma
1588	Primary Tumor	8.35888	Colon Adenocarcinoma
1589	Primary Tumor	6.72693	Colon Adenocarcinoma
1590	Primary Tumor	10.7573	Colon Adenocarcinoma
1591	Primary Tumor	6.17648	Colon Adenocarcinoma
1592	Primary Tumor	5.62242	Colon Adenocarcinoma
1593	Primary Tumor	9.41769	Colon Adenocarcinoma
1594	Primary Tumor	6.00369	Colon Adenocarcinoma
1595	Blood Derived Normal	3.88526	Colon Adenocarcinoma
1596	Solid Tissue Normal	7.32354	Colon Adenocarcinoma
1597	Blood Derived Normal	4.76856	Colon Adenocarcinoma
1598	Blood Derived Normal	6.08322	Colon Adenocarcinoma
1599	Primary Tumor	5.28739	Colon Adenocarcinoma
1600	Primary Tumor	8.87557	Colon Adenocarcinoma
1601	Primary Tumor	5.71186	Colon Adenocarcinoma
1602	Primary Tumor	5.97309	Colon Adenocarcinoma
1603	Primary Tumor	10.8755	Colon Adenocarcinoma
1604	Primary Tumor	8.03849	Colon Adenocarcinoma
1605	Blood Derived Normal	7.50673	Colon Adenocarcinoma
1606	Primary Tumor	4.38455	Colon Adenocarcinoma
1607	Primary Tumor	6.61625	Colon Adenocarcinoma
1608	Primary Tumor	8.75358	Colon Adenocarcinoma
1609	Primary Tumor	6.31367	Colon Adenocarcinoma
1610	Primary Tumor	6.89798	Colon Adenocarcinoma
1611	Primary Tumor	10.0219	Colon Adenocarcinoma
1612	Primary Tumor	7.50017	Colon Adenocarcinoma
1613	Primary Tumor	12.9761	Colon Adenocarcinoma
1614	Primary Tumor	6.8819	Colon Adenocarcinoma
1615	Primary Tumor	10.694	Colon Adenocarcinoma
1616	Primary Tumor	12.4143	Colon Adenocarcinoma
1617	Primary Tumor	5.51147	Colon Adenocarcinoma
1618	Solid Tissue Normal	5.84501	Colon Adenocarcinoma
1619	Primary Tumor	9.58559	Colon Adenocarcinoma
1620	Primary Tumor	7.30722	Colon Adenocarcinoma
1621	Primary Tumor	9.66647	Colon Adenocarcinoma
1622	Primary Tumor	5.73861	Colon Adenocarcinoma
1623	Blood Derived Normal	7.10148	Colon Adenocarcinoma
1624	Primary Tumor	5.32679	Colon Adenocarcinoma
1625	Primary Tumor	8.8859	Colon Adenocarcinoma
1626	Solid Tissue Normal	5.55452	Colon Adenocarcinoma
1627	Solid Tissue Normal	7.12796	Colon Adenocarcinoma
1628	Primary Tumor	8.42209	Colon Adenocarcinoma
1629	Blood Derived Normal	3.35248	Colon Adenocarcinoma
1630	Primary Tumor	10.081	Colon Adenocarcinoma
1631	Primary Tumor	11.4162	Colon Adenocarcinoma
1632	Blood Derived Normal	7.89155	Colon Adenocarcinoma
1633	Primary Tumor	8.03337	Colon Adenocarcinoma
1634	Primary Tumor	8.15169	Colon Adenocarcinoma
1635	Primary Tumor	11.3443	Colon Adenocarcinoma
1636	Solid Tissue Normal	13.2793	Colon Adenocarcinoma
1637	Primary Tumor	9.25364	Colon Adenocarcinoma
1638	Solid Tissue Normal	10.7553	Colon Adenocarcinoma
1639	Primary Tumor	16.3234	Colon Adenocarcinoma
1640	Primary Tumor	8.82355	Colon Adenocarcinoma
1641	Blood Derived Normal	4.66996	Colon Adenocarcinoma
1642	Primary Tumor	5.344	Colon Adenocarcinoma
1643	Blood Derived Normal	5.09056	Colon Adenocarcinoma
1644	Blood Derived Normal	5.47791	Colon Adenocarcinoma
1645	Primary Tumor	7.06191	Colon Adenocarcinoma
1646	Primary Tumor	5.27202	Colon Adenocarcinoma
1647	Primary Tumor	6.55115	Colon Adenocarcinoma
1648	Primary Tumor	7.89311	Colon Adenocarcinoma
1649	Primary Tumor	5.91874	Colon Adenocarcinoma
1650	Primary Tumor	9.96021	Colon Adenocarcinoma
1651	Primary Tumor	9.88896	Colon Adenocarcinoma
1652	Primary Tumor	8.0126	Colon Adenocarcinoma
1653	Primary Tumor	6.28305	Colon Adenocarcinoma
1654	Primary Tumor	8.25711	Colon Adenocarcinoma
1655	Primary Tumor	3.97318	Colon Adenocarcinoma
1656	Primary Tumor	10.9894	Colon Adenocarcinoma
1657	Solid Tissue Normal	8.47691	Colon Adenocarcinoma
1658	Blood Derived Normal	4.48189	Colon Adenocarcinoma
1659	Primary Tumor	6.68028	Colon Adenocarcinoma
1660	Primary Tumor	5.91556	Colon Adenocarcinoma
1661	Solid Tissue Normal	15.2549	Colon Adenocarcinoma
1662	Primary Tumor	7.83172	Colon Adenocarcinoma
1663	Primary Tumor	9.34777	Colon Adenocarcinoma
1664	Primary Tumor	12.5846	Colon Adenocarcinoma
1665	Primary Tumor	6.03435	Colon Adenocarcinoma
1666	Primary Tumor	5.42671	Colon Adenocarcinoma
1667	Primary Tumor	6.9418	Colon Adenocarcinoma
1668	Primary Tumor	6.67109	Colon Adenocarcinoma
1669	Primary Tumor	5.40606	Colon Adenocarcinoma
1670	Primary Tumor	5.84813	Colon Adenocarcinoma
1671	Primary Tumor	7.10083	Colon Adenocarcinoma
1672	Primary Tumor	8.40403	Colon Adenocarcinoma
1673	Primary Tumor	4.8212	Colon Adenocarcinoma
1674	Blood Derived Normal	9.60649	Colon Adenocarcinoma
1675	Primary Tumor	11.9825	Colon Adenocarcinoma
1676	Primary Tumor	5.66666	Colon Adenocarcinoma
1677	Primary Tumor	8.8925	Colon Adenocarcinoma
1678	Blood Derived Normal	4.94839	Colon Adenocarcinoma
1679	Primary Tumor	11.4406	Colon Adenocarcinoma
1680	Primary Tumor	5.32847	Colon Adenocarcinoma
1681	Primary Tumor	8.74767	Colon Adenocarcinoma
1682	Primary Tumor	9.97329	Colon Adenocarcinoma
1683	Primary Tumor	6.30407	Colon Adenocarcinoma
1684	Primary Tumor	8.6794	Colon Adenocarcinoma
1685	Solid Tissue Normal	5.41462	Colon Adenocarcinoma
1686	Primary Tumor	4.69682	Colon Adenocarcinoma
1687	Primary Tumor	12.3724	Colon Adenocarcinoma
1688	Primary Tumor	5.19812	Colon Adenocarcinoma
1689	Primary Tumor	4.66993	Colon Adenocarcinoma
1690	Primary Tumor	13.1733	Colon Adenocarcinoma
1691	Solid Tissue Normal	5.9077	Colon Adenocarcinoma
1692	Primary Tumor	6.8472	Colon Adenocarcinoma
1693	Primary Tumor	6.01807	Colon Adenocarcinoma
1694	Primary Tumor	6.00043	Colon Adenocarcinoma
1695	Blood Derived Normal	4.4282	Colon Adenocarcinoma
1696	Primary Tumor	5.23285	Colon Adenocarcinoma
1697	Blood Derived Normal	5.71793	Colon Adenocarcinoma
1698	Primary Tumor	6.04752	Colon Adenocarcinoma
1699	Primary Tumor	6.13242	Colon Adenocarcinoma
1700	Primary Tumor	9.60769	Colon Adenocarcinoma
1701	Primary Tumor	11.5559	Colon Adenocarcinoma
1702	Primary Tumor	5.43898	Colon Adenocarcinoma
1703	Solid Tissue Normal	5.73961	Colon Adenocarcinoma
1704	Primary Tumor	7.29639	Colon Adenocarcinoma
1705	Solid Tissue Normal	5.1883	Colon Adenocarcinoma
1706	Primary Tumor	8.2497	Colon Adenocarcinoma
1707	Primary Tumor	10.9152	Colon Adenocarcinoma
1708	Primary Tumor	4.98538	Colon Adenocarcinoma
1709	Primary Tumor	12.4398	Colon Adenocarcinoma
1710	Primary Tumor	6.26592	Colon Adenocarcinoma
1711	Primary Tumor	13.2833	Colon Adenocarcinoma
1712	Blood Derived Normal	6.30528	Colon Adenocarcinoma
1713	Primary Tumor	10.0296	Colon Adenocarcinoma
1714	Primary Tumor	9.21238	Colon Adenocarcinoma
1715	Primary Tumor	5.56985	Colon Adenocarcinoma
1716	Primary Tumor	9.23384	Colon Adenocarcinoma
1717	Primary Tumor	8.13852	Colon Adenocarcinoma
1718	Blood Derived Normal	5.34545	Colon Adenocarcinoma
1719	Primary Tumor	4.73118	Colon Adenocarcinoma
1720	Primary Tumor	7.40426	Colon Adenocarcinoma
1721	Primary Tumor	10.878	Colon Adenocarcinoma
1722	Solid Tissue Normal	15.7718	Colon Adenocarcinoma
1723	Primary Tumor	9.75952	Colon Adenocarcinoma
1724	Primary Tumor	5.28966	Colon Adenocarcinoma
1725	Blood Derived Normal	5.75259	Colon Adenocarcinoma
1726	Primary Tumor	12.1228	Colon Adenocarcinoma
1727	Primary Tumor	12.4065	Colon Adenocarcinoma
1728	Primary Tumor	13.038	Colon Adenocarcinoma
1729	Primary Tumor	7.07204	Colon Adenocarcinoma
1730	Primary Tumor	8.33367	Colon Adenocarcinoma
1731	Primary Tumor	8.68174	Colon Adenocarcinoma
1732	Primary Tumor	5.77045	Colon Adenocarcinoma
1733	Primary Tumor	5.88807	Colon Adenocarcinoma
1734	Primary Tumor	6.59363	Colon Adenocarcinoma
1735	Primary Tumor	5.85325	Colon Adenocarcinoma
1736	Blood Derived Normal	5.02415	Colon Adenocarcinoma
1737	Primary Tumor	11.4061	Colon Adenocarcinoma
1738	Primary Tumor	7.32036	Colon Adenocarcinoma
1739	Blood Derived Normal	5.95772	Colon Adenocarcinoma
1740	Primary Tumor	6.5533	Colon Adenocarcinoma
1741	Primary Tumor	3.96068	Colon Adenocarcinoma
1742	Solid Tissue Normal	4.67376	Colon Adenocarcinoma
1743	Primary Tumor	12.9702	Colon Adenocarcinoma
1744	Primary Tumor	12.203	Colon Adenocarcinoma
1745	Primary Tumor	6.91599	Colon Adenocarcinoma
1746	Primary Tumor	4.21484	Colon Adenocarcinoma
1747	Primary Tumor	8.16748	Colon Adenocarcinoma
1748	Primary Tumor	5.60623	Colon Adenocarcinoma
1749	Primary Tumor	7.14734	Colon Adenocarcinoma
1750	Primary Tumor	4.98998	Colon Adenocarcinoma
1751	Solid Tissue Normal	5.83068	Colon Adenocarcinoma
1752	Primary Tumor	9.63484	Colon Adenocarcinoma
1753	Primary Tumor	6.18829	Colon Adenocarcinoma
1754	Primary Tumor	6.21067	Colon Adenocarcinoma
1755	Blood Derived Normal	6.50347	Colon Adenocarcinoma
1756	Blood Derived Normal	6.02815	Colon Adenocarcinoma
1757	Primary Tumor	3.82074	Colon Adenocarcinoma
1758	Blood Derived Normal	4.86766	Colon Adenocarcinoma
1759	Primary Tumor	4.98875	Colon Adenocarcinoma
1760	Primary Tumor	7.04222	Colon Adenocarcinoma
1761	Primary Tumor	5.93562	Colon Adenocarcinoma
1762	Primary Tumor	10.4085	Colon Adenocarcinoma
1763	Primary Tumor	7.18429	Colon Adenocarcinoma
1764	Solid Tissue Normal	6.27646	Colon Adenocarcinoma
1765	Primary Tumor	10.5897	Colon Adenocarcinoma
1766	Primary Tumor	11.6804	Colon Adenocarcinoma
1767	Primary Tumor	5.1629	Colon Adenocarcinoma
1768	Primary Tumor	4.76746	Colon Adenocarcinoma
1769	Primary Tumor	5.81834	Colon Adenocarcinoma
1770	Primary Tumor	6.09193	Colon Adenocarcinoma
1771	Blood Derived Normal	3.9762	Colon Adenocarcinoma
1772	Primary Tumor	6.15143	Colon Adenocarcinoma
1773	Primary Tumor	5.85191	Colon Adenocarcinoma
1774	Primary Tumor	11.7841	Colon Adenocarcinoma
1775	Primary Tumor	6.06694	Colon Adenocarcinoma
1776	Blood Derived Normal	4.4578	Colon Adenocarcinoma
1777	Primary Tumor	9.07868	Colon Adenocarcinoma
1778	Primary Tumor	6.9706	Colon Adenocarcinoma
1779	Blood Derived Normal	5.50356	Colon Adenocarcinoma
1780	Blood Derived Normal	5.68813	Colon Adenocarcinoma
1781	Primary Tumor	5.13167	Colon Adenocarcinoma
1782	Primary Tumor	5.50553	Colon Adenocarcinoma
1783	Solid Tissue Normal	5.67286	Colon Adenocarcinoma
1784	Solid Tissue Normal	6.0084	Colon Adenocarcinoma
1785	Primary Tumor	7.0863	Colon Adenocarcinoma
1786	Solid Tissue Normal	5.4863	Colon Adenocarcinoma
1787	Primary Tumor	7.49982	Colon Adenocarcinoma
1788	Primary Tumor	12.1627	Colon Adenocarcinoma
1789	Primary Tumor	11.9237	Colon Adenocarcinoma
1790	Primary Tumor	5.92931	Colon Adenocarcinoma
1791	Primary Tumor	12.7393	Colon Adenocarcinoma
1792	Primary Tumor	12.552	Colon Adenocarcinoma
1793	Primary Tumor	6.52035	Colon Adenocarcinoma
1794	Primary Tumor	12.1117	Colon Adenocarcinoma
1795	Primary Tumor	8.35036	Colon Adenocarcinoma
1796	Primary Tumor	7.80627	Colon Adenocarcinoma
1797	Primary Tumor	9.23123	Colon Adenocarcinoma
1798	Primary Tumor	8.97707	Colon Adenocarcinoma
1799	Primary Tumor	6.32804	Colon Adenocarcinoma
1800	Primary Tumor	11.1361	Colon Adenocarcinoma
1801	Primary Tumor	6.10667	Colon Adenocarcinoma
1802	Primary Tumor	6.43832	Colon Adenocarcinoma
1803	Primary Tumor	5.4188	Colon Adenocarcinoma
1804	Primary Tumor	6.2907	Colon Adenocarcinoma
1805	Solid Tissue Normal	6.47383	Colon Adenocarcinoma
1806	Primary Tumor	9.0482	Colon Adenocarcinoma
1807	Primary Tumor	7.08391	Colon Adenocarcinoma
1808	Blood Derived Normal	6.41179	Colon Adenocarcinoma
1809	Primary Tumor	4.64016	Colon Adenocarcinoma
1810	Primary Tumor	4.23754	Colon Adenocarcinoma
1811	Primary Tumor	6.50302	Colon Adenocarcinoma
1812	Primary Tumor	10.9075	Colon Adenocarcinoma
1813	Primary Tumor	5.60098	Colon Adenocarcinoma
1814	Blood Derived Normal	5.38615	Colon Adenocarcinoma
1815	Primary Tumor	12.1595	Colon Adenocarcinoma
1816	Solid Tissue Normal	5.91844	Colon Adenocarcinoma
1817	Primary Tumor	6.28344	Colon Adenocarcinoma
1818	Solid Tissue Normal	5.67425	Colon Adenocarcinoma
1819	Primary Tumor	13.5573	Colon Adenocarcinoma
1820	Primary Tumor	4.11174	Colon Adenocarcinoma
1821	Primary Tumor	4.95206	Colon Adenocarcinoma
1822	Primary Tumor	6.56411	Colon Adenocarcinoma
1823	Primary Tumor	6.57942	Colon Adenocarcinoma
1824	Primary Tumor	8.27519	Colon Adenocarcinoma
1825	Primary Tumor	10.258	Colon Adenocarcinoma
1826	Primary Tumor	5.50221	Colon Adenocarcinoma
1827	Primary Tumor	6.47738	Colon Adenocarcinoma
1828	Blood Derived Normal	5.61538	Colon Adenocarcinoma
1829	Primary Tumor	13.1617	Colon Adenocarcinoma
1830	Solid Tissue Normal	11.2532	Colon Adenocarcinoma
1831	Primary Tumor	6.14753	Colon Adenocarcinoma
1832	Primary Tumor	8.94297	Colon Adenocarcinoma
1833	Solid Tissue Normal	7.87869	Colon Adenocarcinoma
1834	Primary Tumor	5.69964	Colon Adenocarcinoma
1835	Primary Tumor	8.66179	Colon Adenocarcinoma
1836	Primary Tumor	11.6929	Colon Adenocarcinoma
1837	Primary Tumor	8.93961	Colon Adenocarcinoma
1838	Blood Derived Normal	6.03502	Colon Adenocarcinoma
1839	Primary Tumor	11.0176	Colon Adenocarcinoma
1840	Blood Derived Normal	4.05064	Colon Adenocarcinoma
1841	Primary Tumor	6.8014	Colon Adenocarcinoma
1842	Primary Tumor	6.47739	Colon Adenocarcinoma
1843	Blood Derived Normal	4.94684	Colon Adenocarcinoma
1844	Primary Tumor	5.79858	Colon Adenocarcinoma
1845	Blood Derived Normal	6.72692	Colon Adenocarcinoma
1846	Solid Tissue Normal	4.81766	Colon Adenocarcinoma
1847	Solid Tissue Normal	5.57626	Colon Adenocarcinoma
1848	Primary Tumor	6.14799	Colon Adenocarcinoma
1849	Primary Tumor	6.89426	Colon Adenocarcinoma
1850	Primary Tumor	6.77908	Colon Adenocarcinoma
1851	Primary Tumor	5.53457	Colon Adenocarcinoma
1852	Primary Tumor	11.8733	Colon Adenocarcinoma
1853	Primary Tumor	8.40464	Colon Adenocarcinoma
1854	Primary Tumor	5.43738	Colon Adenocarcinoma
1855	Primary Tumor	5.15407	Colon Adenocarcinoma
1856	Primary Tumor	6.1595	Colon Adenocarcinoma
1857	Blood Derived Normal	5.28911	Colon Adenocarcinoma
1858	Primary Tumor	3.19278	Colon Adenocarcinoma
1859	Primary Tumor	6.69792	Colon Adenocarcinoma
1860	Primary Tumor	6.2886	Colon Adenocarcinoma
1861	Primary Tumor	5.31784	Colon Adenocarcinoma
1862	Primary Tumor	6.88936	Colon Adenocarcinoma
1863	Primary Tumor	8.94143	Colon Adenocarcinoma
1864	Primary Tumor	5.14714	Colon Adenocarcinoma
1865	Primary Tumor	5.78037	Colon Adenocarcinoma
1866	Primary Tumor	17.9249	Colon Adenocarcinoma
1867	Primary Tumor	10.302	Colon Adenocarcinoma
1868	Solid Tissue Normal	6.49792	Colon Adenocarcinoma
1869	Primary Tumor	5.68209	Colon Adenocarcinoma
1870	Primary Tumor	14.8039	Colon Adenocarcinoma
1871	Primary Tumor	7.51935	Colon Adenocarcinoma
1872	Primary Tumor	4.62699	Colon Adenocarcinoma
1873	Primary Tumor	6.2799	Colon Adenocarcinoma
1874	Primary Tumor	5.65407	Colon Adenocarcinoma
1875	Primary Tumor	6.13007	Colon Adenocarcinoma
1876	Solid Tissue Normal	10.648	Colon Adenocarcinoma
1877	Primary Tumor	11.6981	Colon Adenocarcinoma
1878	Primary Tumor	6.51112	Colon Adenocarcinoma
1879	Primary Tumor	8.26362	Colon Adenocarcinoma
1880	Primary Tumor	9.63849	Colon Adenocarcinoma
1881	Primary Tumor	10.7696	Colon Adenocarcinoma
1882	Primary Tumor	7.35252	Colon Adenocarcinoma
1883	Primary Tumor	5.86239	Colon Adenocarcinoma
1884	Blood Derived Normal	4.6255	Colon Adenocarcinoma
1885	Primary Tumor	6.16009	Colon Adenocarcinoma
1886	Blood Derived Normal	4.50888	Colon Adenocarcinoma
1887	Primary Tumor	5.07883	Colon Adenocarcinoma
1888	Primary Tumor	6.27495	Colon Adenocarcinoma
1889	Blood Derived Normal	5.21126	Colon Adenocarcinoma
1890	Primary Tumor	6.25176	Colon Adenocarcinoma
1891	Primary Tumor	13.2886	Colon Adenocarcinoma
1892	Primary Tumor	9.76375	Colon Adenocarcinoma
1893	Primary Tumor	4.93968	Colon Adenocarcinoma
1894	Primary Tumor	10.8925	Colon Adenocarcinoma
1895	Blood Derived Normal	5.6975	Colon Adenocarcinoma
1896	Primary Tumor	5.72807	Colon Adenocarcinoma
1897	Primary Tumor	7.22937	Colon Adenocarcinoma
1898	Primary Tumor	5.62114	Colon Adenocarcinoma
1899	Primary Tumor	7.62471	Colon Adenocarcinoma
1900	Blood Derived Normal	7.13076	Colon Adenocarcinoma
1901	Primary Tumor	10.4178	Colon Adenocarcinoma
1902	Primary Tumor	4.8073	Colon Adenocarcinoma
1903	Primary Tumor	13.2778	Colon Adenocarcinoma
1904	Primary Tumor	7.701	Colon Adenocarcinoma
1905	Primary Tumor	5.4191	Colon Adenocarcinoma
1906	Primary Tumor	7.07447	Colon Adenocarcinoma
1907	Primary Tumor	8.53345	Colon Adenocarcinoma
1908	Primary Tumor	16.4819	Colon Adenocarcinoma
1909	Primary Tumor	4.66678	Colon Adenocarcinoma
1910	Primary Tumor	7.86704	Colon Adenocarcinoma
1911	Primary Tumor	6.91397	Colon Adenocarcinoma
1912	Primary Tumor	9.54288	Colon Adenocarcinoma
1913	Primary Tumor	7.51542	Colon Adenocarcinoma
1914	Blood Derived Normal	5.7423	Colon Adenocarcinoma
1915	Primary Tumor	4.57566	Colon Adenocarcinoma
1916	Primary Tumor	4.7925	Colon Adenocarcinoma
1917	Primary Tumor	5.50252	Colon Adenocarcinoma
1918	Primary Tumor	5.15607	Colon Adenocarcinoma
1919	Primary Tumor	6.5889	Colon Adenocarcinoma
1920	Primary Tumor	10.2477	Colon Adenocarcinoma
1921	Primary Tumor	7.41959	Colon Adenocarcinoma
1922	Primary Tumor	5.82558	Colon Adenocarcinoma
1923	Primary Tumor	15.4807	Colon Adenocarcinoma
1924	Primary Tumor	6.95899	Colon Adenocarcinoma
1925	Primary Tumor	5.83735	Colon Adenocarcinoma
1926	Primary Tumor	13.1501	Colon Adenocarcinoma
1927	Primary Tumor	9.04005	Colon Adenocarcinoma
1928	Primary Tumor	6.16415	Colon Adenocarcinoma
1929	Primary Tumor	5.50157	Colon Adenocarcinoma
1930	Primary Tumor	7.536	Colon Adenocarcinoma
1931	Primary Tumor	5.78228	Colon Adenocarcinoma
1932	Primary Tumor	3.80291	Colon Adenocarcinoma
1933	Primary Tumor	6.0571	Colon Adenocarcinoma
1934	Primary Tumor	6.12673	Colon Adenocarcinoma
1935	Solid Tissue Normal	7.82822	Colon Adenocarcinoma
1936	Primary Tumor	5.89904	Colon Adenocarcinoma
1937	Primary Tumor	6.88181	Colon Adenocarcinoma
1938	Primary Tumor	5.8723	Colon Adenocarcinoma
1939	Primary Tumor	8.16749	Colon Adenocarcinoma
1940	Primary Tumor	6.15002	Colon Adenocarcinoma
1941	Primary Tumor	6.21625	Colon Adenocarcinoma
1942	Primary Tumor	5.51248	Colon Adenocarcinoma
1943	Primary Tumor	6.16411	Colon Adenocarcinoma
1944	Primary Tumor	8.1885	Colon Adenocarcinoma
1945	Primary Tumor	6.01496	Colon Adenocarcinoma
1946	Primary Tumor	4.36619	Colon Adenocarcinoma
1947	Primary Tumor	12.8489	Colon Adenocarcinoma
1948	Primary Tumor	12.0544	Colon Adenocarcinoma
1949	Primary Tumor	7.49304	Colon Adenocarcinoma
1950	Primary Tumor	5.42383	Colon Adenocarcinoma
1951	Solid Tissue Normal	7.27994	Colon Adenocarcinoma
1952	Blood Derived Normal	5.86549	Colon Adenocarcinoma
1953	Primary Tumor	10.7539	Colon Adenocarcinoma
1954	Primary Tumor	5.24825	Colon Adenocarcinoma
1955	Primary Tumor	10.0655	Colon Adenocarcinoma
1956	Primary Tumor	9.57344	Colon Adenocarcinoma
1957	Primary Tumor	4.1391	Colon Adenocarcinoma
1958	Primary Tumor	20.4562	Colon Adenocarcinoma
1959	Primary Tumor	11.7059	Colon Adenocarcinoma
1960	Primary Tumor	12.7881	Colon Adenocarcinoma
1961	Primary Tumor	11.673	Colon Adenocarcinoma
1962	Primary Tumor	5.74016	Colon Adenocarcinoma
1963	Primary Tumor	10.8277	Colon Adenocarcinoma
1964	Primary Tumor	4.05626	Colon Adenocarcinoma
1965	Primary Tumor	8.38463	Colon Adenocarcinoma
1966	Primary Tumor	12.4077	Colon Adenocarcinoma
1967	Primary Tumor	11.3496	Colon Adenocarcinoma
1968	Blood Derived Normal	5.07405	Colon Adenocarcinoma
1969	Primary Tumor	5.59186	Colon Adenocarcinoma
1970	Blood Derived Normal	4.89226	Colon Adenocarcinoma
1971	Primary Tumor	7.70587	Colon Adenocarcinoma
1972	Primary Tumor	8.96265	Colon Adenocarcinoma
1973	Primary Tumor	4.42935	Colon Adenocarcinoma
1974	Primary Tumor	4.87771	Colon Adenocarcinoma
1975	Primary Tumor	4.26566	Colon Adenocarcinoma
1976	Primary Tumor	5.59603	Colon Adenocarcinoma
1977	Primary Tumor	6.30123	Colon Adenocarcinoma
1978	Primary Tumor	8.70473	Colon Adenocarcinoma
1979	Primary Tumor	8.91153	Colon Adenocarcinoma
1980	Primary Tumor	7.84244	Colon Adenocarcinoma
1981	Primary Tumor	12.4409	Colon Adenocarcinoma
1982	Primary Tumor	5.4429	Colon Adenocarcinoma
1983	Primary Tumor	7.38785	Colon Adenocarcinoma
1984	Primary Tumor	17.1955	Colon Adenocarcinoma
1985	Blood Derived Normal	4.42689	Colon Adenocarcinoma
1986	Primary Tumor	10.386	Colon Adenocarcinoma
1987	Primary Tumor	6.95268	Colon Adenocarcinoma
1988	Primary Tumor	6.53431	Colon Adenocarcinoma
1989	Primary Tumor	4.98254	Colon Adenocarcinoma
1990	Primary Tumor	8.64627	Colon Adenocarcinoma
1991	Primary Tumor	7.74616	Colon Adenocarcinoma
1992	Solid Tissue Normal	6.90352	Colon Adenocarcinoma
1993	Blood Derived Normal	5.44321	Colon Adenocarcinoma
1994	Blood Derived Normal	6.7826	Colon Adenocarcinoma
1995	Primary Tumor	5.9098	Colon Adenocarcinoma
1996	Primary Tumor	7.40728	Colon Adenocarcinoma
1997	Primary Tumor	5.01302	Colon Adenocarcinoma
1998	Blood Derived Normal	5.12234	Colon Adenocarcinoma
1999	Primary Tumor	8.75039	Colon Adenocarcinoma
[truncated: 793 more rows]

## Sheet: Fig 3c
	GIBoolean	Fuso	sample_type
1	Non-GI-Tract Cancer	7.07404	Primary Tumor
2	Non-GI-Tract Cancer	6.53033	Primary Tumor
3	Non-GI-Tract Cancer	5.72472	Primary Tumor
4	Non-GI-Tract Cancer	5.7366	Primary Tumor
5	Non-GI-Tract Cancer	5.64707	Primary Tumor
6	Non-GI-Tract Cancer	6.39438	Primary Tumor
7	Non-GI-Tract Cancer	5.32537	Primary Tumor
8	Non-GI-Tract Cancer	6.73966	Primary Tumor
9	Non-GI-Tract Cancer	5.43355	Primary Tumor
10	Non-GI-Tract Cancer	6.7045	Primary Tumor
11	Non-GI-Tract Cancer	6.34455	Primary Tumor
12	Non-GI-Tract Cancer	7.02661	Primary Tumor
13	Non-GI-Tract Cancer	6.22828	Primary Tumor
14	Non-GI-Tract Cancer	6.67875	Primary Tumor
15	Non-GI-Tract Cancer	6.24747	Primary Tumor
16	Non-GI-Tract Cancer	7.01773	Primary Tumor
17	Non-GI-Tract Cancer	6.36963	Primary Tumor
18	Non-GI-Tract Cancer	6.02601	Primary Tumor
19	Non-GI-Tract Cancer	6.30774	Primary Tumor
20	Non-GI-Tract Cancer	7.33283	Primary Tumor
21	Non-GI-Tract Cancer	5.85781	Primary Tumor
22	Non-GI-Tract Cancer	6.40966	Primary Tumor
23	Non-GI-Tract Cancer	6.35908	Primary Tumor
24	Non-GI-Tract Cancer	6.75632	Primary Tumor
25	Non-GI-Tract Cancer	6.41111	Primary Tumor
26	Non-GI-Tract Cancer	7.10592	Primary Tumor
27	Non-GI-Tract Cancer	6.84111	Primary Tumor
28	Non-GI-Tract Cancer	7.39042	Primary Tumor
29	Non-GI-Tract Cancer	7.75153	Primary Tumor
30	Non-GI-Tract Cancer	7.9084	Primary Tumor
31	Non-GI-Tract Cancer	6.20785	Primary Tumor
32	Non-GI-Tract Cancer	6.79464	Primary Tumor
33	Non-GI-Tract Cancer	6.77262	Primary Tumor
34	Non-GI-Tract Cancer	5.91815	Primary Tumor
35	Non-GI-Tract Cancer	7.65044	Primary Tumor
36	Non-GI-Tract Cancer	7.04611	Primary Tumor
37	Non-GI-Tract Cancer	5.39556	Primary Tumor
38	Non-GI-Tract Cancer	5.84868	Primary Tumor
39	Non-GI-Tract Cancer	6.37218	Primary Tumor
40	Non-GI-Tract Cancer	5.42089	Primary Tumor
41	Non-GI-Tract Cancer	7.24476	Primary Tumor
42	Non-GI-Tract Cancer	6.2464	Primary Tumor
43	Non-GI-Tract Cancer	6.1995	Primary Tumor
44	Non-GI-Tract Cancer	4.75192	Primary Tumor
45	Non-GI-Tract Cancer	6.06866	Primary Tumor
46	Non-GI-Tract Cancer	5.19759	Primary Tumor
47	Non-GI-Tract Cancer	6.56232	Primary Tumor
48	Non-GI-Tract Cancer	6.88158	Primary Tumor
49	Non-GI-Tract Cancer	6.00204	Primary Tumor
50	Non-GI-Tract Cancer	5.92287	Primary Tumor
51	Non-GI-Tract Cancer	6.90788	Primary Tumor
52	Non-GI-Tract Cancer	6.68863	Primary Tumor
53	Non-GI-Tract Cancer	6.53282	Primary Tumor
54	Non-GI-Tract Cancer	7.38443	Primary Tumor
55	Non-GI-Tract Cancer	7.06388	Primary Tumor
56	Non-GI-Tract Cancer	7.27919	Primary Tumor
57	Non-GI-Tract Cancer	6.20061	Primary Tumor
58	Non-GI-Tract Cancer	6.43666	Primary Tumor
59	Non-GI-Tract Cancer	11.6711	Primary Tumor
60	Non-GI-Tract Cancer	4.82743	Solid Tissue Normal
61	Non-GI-Tract Cancer	6.45116	Primary Tumor
62	Non-GI-Tract Cancer	5.9179	Primary Tumor
63	Non-GI-Tract Cancer	5.88877	Primary Tumor
64	Non-GI-Tract Cancer	7.71724	Primary Tumor
65	Non-GI-Tract Cancer	7.50164	Primary Tumor
66	Non-GI-Tract Cancer	6.24013	Solid Tissue Normal
67	Non-GI-Tract Cancer	6.44812	Primary Tumor
68	Non-GI-Tract Cancer	5.15449	Primary Tumor
69	Non-GI-Tract Cancer	4.95033	Primary Tumor
70	Non-GI-Tract Cancer	6.14098	Primary Tumor
71	Non-GI-Tract Cancer	7.49677	Primary Tumor
72	Non-GI-Tract Cancer	6.19597	Primary Tumor
73	Non-GI-Tract Cancer	6.04889	Primary Tumor
74	Non-GI-Tract Cancer	5.20693	Solid Tissue Normal
75	Non-GI-Tract Cancer	6.10811	Primary Tumor
76	Non-GI-Tract Cancer	5.28105	Primary Tumor
77	Non-GI-Tract Cancer	6.57931	Primary Tumor
78	Non-GI-Tract Cancer	6.90289	Primary Tumor
79	Non-GI-Tract Cancer	6.19896	Primary Tumor
80	Non-GI-Tract Cancer	5.99601	Solid Tissue Normal
81	Non-GI-Tract Cancer	6.34302	Primary Tumor
82	Non-GI-Tract Cancer	6.07144	Primary Tumor
83	Non-GI-Tract Cancer	6.71029	Primary Tumor
84	Non-GI-Tract Cancer	6.29959	Primary Tumor
85	Non-GI-Tract Cancer	5.91164	Primary Tumor
86	Non-GI-Tract Cancer	6.06971	Primary Tumor
87	Non-GI-Tract Cancer	5.63237	Primary Tumor
88	Non-GI-Tract Cancer	6.29589	Primary Tumor
89	Non-GI-Tract Cancer	7.04002	Primary Tumor
90	Non-GI-Tract Cancer	7.00425	Primary Tumor
91	Non-GI-Tract Cancer	5.78583	Primary Tumor
92	Non-GI-Tract Cancer	5.69914	Primary Tumor
93	Non-GI-Tract Cancer	5.55251	Primary Tumor
94	Non-GI-Tract Cancer	6.71036	Primary Tumor
95	Non-GI-Tract Cancer	6.49378	Primary Tumor
96	Non-GI-Tract Cancer	6.16894	Primary Tumor
97	Non-GI-Tract Cancer	5.73065	Primary Tumor
98	Non-GI-Tract Cancer	6.48122	Primary Tumor
99	Non-GI-Tract Cancer	5.4963	Primary Tumor
100	Non-GI-Tract Cancer	6.63216	Primary Tumor
101	Non-GI-Tract Cancer	6.15809	Primary Tumor
102	Non-GI-Tract Cancer	5.26917	Primary Tumor
103	Non-GI-Tract Cancer	6.7619	Primary Tumor
104	Non-GI-Tract Cancer	5.51489	Primary Tumor
105	Non-GI-Tract Cancer	6.74038	Primary Tumor
106	Non-GI-Tract Cancer	6.17294	Primary Tumor
107	Non-GI-Tract Cancer	4.02442	Primary Tumor
108	Non-GI-Tract Cancer	6.87515	Primary Tumor
109	Non-GI-Tract Cancer	6.65133	Primary Tumor
110	Non-GI-Tract Cancer	5.52938	Solid Tissue Normal
111	Non-GI-Tract Cancer	6.61955	Primary Tumor
112	Non-GI-Tract Cancer	6.47996	Primary Tumor
113	Non-GI-Tract Cancer	6.20753	Primary Tumor
114	Non-GI-Tract Cancer	6.58737	Primary Tumor
115	Non-GI-Tract Cancer	6.49422	Primary Tumor
116	Non-GI-Tract Cancer	5.61622	Primary Tumor
117	Non-GI-Tract Cancer	6.1998	Primary Tumor
118	Non-GI-Tract Cancer	6.05232	Primary Tumor
119	Non-GI-Tract Cancer	6.1613	Primary Tumor
120	Non-GI-Tract Cancer	6.75975	Primary Tumor
121	Non-GI-Tract Cancer	6.30531	Primary Tumor
122	Non-GI-Tract Cancer	6.27861	Primary Tumor
123	Non-GI-Tract Cancer	5.81833	Primary Tumor
124	Non-GI-Tract Cancer	5.061	Primary Tumor
125	Non-GI-Tract Cancer	5.52711	Primary Tumor
126	Non-GI-Tract Cancer	6.76632	Primary Tumor
127	Non-GI-Tract Cancer	5.27358	Primary Tumor
128	Non-GI-Tract Cancer	5.41798	Primary Tumor
129	Non-GI-Tract Cancer	6.41848	Primary Tumor
130	Non-GI-Tract Cancer	6.9397	Primary Tumor
131	Non-GI-Tract Cancer	5.96613	Primary Tumor
132	Non-GI-Tract Cancer	7.14012	Primary Tumor
133	Non-GI-Tract Cancer	6.27369	Primary Tumor
134	Non-GI-Tract Cancer	6.62131	Primary Tumor
135	Non-GI-Tract Cancer	6.25839	Primary Tumor
136	Non-GI-Tract Cancer	6.14553	Primary Tumor
137	Non-GI-Tract Cancer	7.13307	Primary Tumor
138	Non-GI-Tract Cancer	6.93122	Primary Tumor
139	Non-GI-Tract Cancer	7.68657	Primary Tumor
140	Non-GI-Tract Cancer	5.40467	Primary Tumor
141	Non-GI-Tract Cancer	6.44501	Primary Tumor
142	Non-GI-Tract Cancer	5.24289	Primary Tumor
143	Non-GI-Tract Cancer	6.56123	Primary Tumor
144	Non-GI-Tract Cancer	5.6189	Primary Tumor
145	Non-GI-Tract Cancer	9.95139	Primary Tumor
146	Non-GI-Tract Cancer	6.1047	Primary Tumor
147	Non-GI-Tract Cancer	6.26703	Primary Tumor
148	Non-GI-Tract Cancer	6.42828	Primary Tumor
149	Non-GI-Tract Cancer	6.65198	Primary Tumor
150	Non-GI-Tract Cancer	6.39917	Primary Tumor
151	Non-GI-Tract Cancer	5.48099	Primary Tumor
152	Non-GI-Tract Cancer	6.66909	Primary Tumor
153	Non-GI-Tract Cancer	5.79133	Primary Tumor
154	Non-GI-Tract Cancer	6.2964	Primary Tumor
155	Non-GI-Tract Cancer	5.98192	Primary Tumor
156	Non-GI-Tract Cancer	5.7196	Primary Tumor
157	Non-GI-Tract Cancer	7.29166	Primary Tumor
158	Non-GI-Tract Cancer	6.27475	Primary Tumor
159	Non-GI-Tract Cancer	7.78553	Primary Tumor
160	Non-GI-Tract Cancer	7.15947	Primary Tumor
161	Non-GI-Tract Cancer	6.5461	Primary Tumor
162	Non-GI-Tract Cancer	6.32749	Primary Tumor
163	Non-GI-Tract Cancer	6.88944	Primary Tumor
164	Non-GI-Tract Cancer	7.69336	Primary Tumor
165	Non-GI-Tract Cancer	6.55504	Primary Tumor
166	Non-GI-Tract Cancer	6.05762	Primary Tumor
167	Non-GI-Tract Cancer	5.7308	Primary Tumor
168	Non-GI-Tract Cancer	5.95199	Primary Tumor
169	Non-GI-Tract Cancer	5.90824	Primary Tumor
170	Non-GI-Tract Cancer	6.65546	Primary Tumor
171	Non-GI-Tract Cancer	5.94019	Primary Tumor
172	Non-GI-Tract Cancer	6.80929	Primary Tumor
173	Non-GI-Tract Cancer	6.12571	Primary Tumor
174	Non-GI-Tract Cancer	5.87347	Primary Tumor
175	Non-GI-Tract Cancer	6.71937	Primary Tumor
176	Non-GI-Tract Cancer	5.71308	Primary Tumor
177	Non-GI-Tract Cancer	6.30048	Primary Tumor
178	Non-GI-Tract Cancer	6.7122	Primary Tumor
179	Non-GI-Tract Cancer	6.98059	Primary Tumor
180	Non-GI-Tract Cancer	6.73507	Primary Tumor
181	Non-GI-Tract Cancer	5.7241	Primary Tumor
182	Non-GI-Tract Cancer	5.50638	Primary Tumor
183	Non-GI-Tract Cancer	6.37543	Primary Tumor
184	Non-GI-Tract Cancer	5.81832	Primary Tumor
185	Non-GI-Tract Cancer	6.3332	Primary Tumor
186	Non-GI-Tract Cancer	6.9535	Primary Tumor
187	Non-GI-Tract Cancer	6.81163	Primary Tumor
188	Non-GI-Tract Cancer	6.50196	Primary Tumor
189	Non-GI-Tract Cancer	6.53001	Primary Tumor
190	Non-GI-Tract Cancer	5.59366	Primary Tumor
191	Non-GI-Tract Cancer	6.40489	Primary Tumor
192	Non-GI-Tract Cancer	5.92674	Primary Tumor
193	Non-GI-Tract Cancer	6.47899	Primary Tumor
194	Non-GI-Tract Cancer	6.45831	Primary Tumor
195	Non-GI-Tract Cancer	7.1219	Primary Tumor
196	Non-GI-Tract Cancer	6.93113	Primary Tumor
197	Non-GI-Tract Cancer	6.73533	Primary Tumor
198	Non-GI-Tract Cancer	6.3833	Primary Tumor
199	Non-GI-Tract Cancer	5.14181	Primary Tumor
200	Non-GI-Tract Cancer	6.1473	Primary Tumor
201	Non-GI-Tract Cancer	6.04583	Primary Tumor
202	Non-GI-Tract Cancer	4.43315	Primary Tumor
203	Non-GI-Tract Cancer	6.0352	Primary Tumor
204	Non-GI-Tract Cancer	6.40424	Primary Tumor
205	Non-GI-Tract Cancer	6.05757	Primary Tumor
206	Non-GI-Tract Cancer	6.30181	Primary Tumor
207	Non-GI-Tract Cancer	5.69011	Primary Tumor
208	Non-GI-Tract Cancer	7.63183	Primary Tumor
209	Non-GI-Tract Cancer	4.46962	Primary Tumor
210	Non-GI-Tract Cancer	6.30825	Primary Tumor
211	Non-GI-Tract Cancer	6.88374	Primary Tumor
212	Non-GI-Tract Cancer	6.1332	Primary Tumor
213	Non-GI-Tract Cancer	4.45402	Primary Tumor
214	Non-GI-Tract Cancer	5.36365	Primary Tumor
215	Non-GI-Tract Cancer	7.1999	Primary Tumor
216	Non-GI-Tract Cancer	6.38913	Primary Tumor
217	Non-GI-Tract Cancer	6.13363	Primary Tumor
218	Non-GI-Tract Cancer	5.62606	Primary Tumor
219	Non-GI-Tract Cancer	5.48699	Primary Tumor
220	Non-GI-Tract Cancer	7.03613	Primary Tumor
221	Non-GI-Tract Cancer	6.19353	Primary Tumor
222	Non-GI-Tract Cancer	7.12325	Primary Tumor
223	Non-GI-Tract Cancer	6.85866	Primary Tumor
224	Non-GI-Tract Cancer	7.11544	Primary Tumor
225	Non-GI-Tract Cancer	6.2318	Primary Tumor
226	Non-GI-Tract Cancer	6.33976	Primary Tumor
227	Non-GI-Tract Cancer	5.7846	Primary Tumor
228	Non-GI-Tract Cancer	5.89008	Primary Tumor
229	Non-GI-Tract Cancer	7.17443	Primary Tumor
230	Non-GI-Tract Cancer	6.53197	Primary Tumor
231	Non-GI-Tract Cancer	6.10684	Primary Tumor
232	Non-GI-Tract Cancer	7.0353	Primary Tumor
233	Non-GI-Tract Cancer	6.07813	Primary Tumor
234	Non-GI-Tract Cancer	7.02567	Primary Tumor
235	Non-GI-Tract Cancer	6.33426	Primary Tumor
236	Non-GI-Tract Cancer	6.33502	Primary Tumor
237	Non-GI-Tract Cancer	6.37307	Primary Tumor
238	Non-GI-Tract Cancer	7.04672	Primary Tumor
239	Non-GI-Tract Cancer	6.21734	Primary Tumor
240	Non-GI-Tract Cancer	6.44684	Primary Tumor
241	Non-GI-Tract Cancer	6.53028	Primary Tumor
242	Non-GI-Tract Cancer	5.70776	Primary Tumor
243	Non-GI-Tract Cancer	6.31137	Primary Tumor
244	Non-GI-Tract Cancer	5.37719	Primary Tumor
245	Non-GI-Tract Cancer	5.09133	Primary Tumor
246	Non-GI-Tract Cancer	6.65786	Primary Tumor
247	Non-GI-Tract Cancer	5.84908	Primary Tumor
248	Non-GI-Tract Cancer	6.13836	Primary Tumor
249	Non-GI-Tract Cancer	6.88564	Primary Tumor
250	Non-GI-Tract Cancer	6.37952	Primary Tumor
251	Non-GI-Tract Cancer	7.13376	Primary Tumor
252	Non-GI-Tract Cancer	6.50364	Primary Tumor
253	Non-GI-Tract Cancer	6.48309	Primary Tumor
254	Non-GI-Tract Cancer	9.95227	Primary Tumor
255	Non-GI-Tract Cancer	7.50459	Primary Tumor
256	Non-GI-Tract Cancer	5.18344	Primary Tumor
257	Non-GI-Tract Cancer	5.59097	Primary Tumor
258	Non-GI-Tract Cancer	6.45977	Primary Tumor
259	Non-GI-Tract Cancer	5.729	Primary Tumor
260	Non-GI-Tract Cancer	6.52527	Primary Tumor
261	Non-GI-Tract Cancer	6.25776	Primary Tumor
262	Non-GI-Tract Cancer	5.9933	Primary Tumor
263	Non-GI-Tract Cancer	6.61673	Primary Tumor
264	Non-GI-Tract Cancer	5.96755	Primary Tumor
265	Non-GI-Tract Cancer	6.32065	Primary Tumor
266	Non-GI-Tract Cancer	5.78531	Primary Tumor
267	Non-GI-Tract Cancer	7.60501	Primary Tumor
268	Non-GI-Tract Cancer	6.05062	Primary Tumor
269	Non-GI-Tract Cancer	7.64936	Primary Tumor
270	Non-GI-Tract Cancer	6.9739	Primary Tumor
271	Non-GI-Tract Cancer	7.00081	Primary Tumor
272	Non-GI-Tract Cancer	6.78378	Primary Tumor
273	Non-GI-Tract Cancer	6.21304	Primary Tumor
274	Non-GI-Tract Cancer	6.52564	Primary Tumor
275	Non-GI-Tract Cancer	5.56304	Primary Tumor
276	Non-GI-Tract Cancer	6.31078	Primary Tumor
277	Non-GI-Tract Cancer	5.10397	Primary Tumor
278	Non-GI-Tract Cancer	6.01264	Primary Tumor
279	Non-GI-Tract Cancer	6.18703	Primary Tumor
280	Non-GI-Tract Cancer	6.64875	Primary Tumor
281	Non-GI-Tract Cancer	6.40294	Primary Tumor
282	Non-GI-Tract Cancer	6.52637	Primary Tumor
283	Non-GI-Tract Cancer	7.01607	Primary Tumor
284	Non-GI-Tract Cancer	6.38012	Primary Tumor
285	Non-GI-Tract Cancer	5.7109	Primary Tumor
286	Non-GI-Tract Cancer	6.35416	Primary Tumor
287	Non-GI-Tract Cancer	7.56721	Primary Tumor
288	Non-GI-Tract Cancer	5.87268	Primary Tumor
289	Non-GI-Tract Cancer	6.57889	Primary Tumor
290	Non-GI-Tract Cancer	6.56747	Primary Tumor
291	Non-GI-Tract Cancer	5.97826	Solid Tissue Normal
292	Non-GI-Tract Cancer	5.48336	Primary Tumor
293	Non-GI-Tract Cancer	6.50397	Primary Tumor
294	Non-GI-Tract Cancer	6.13658	Primary Tumor
295	Non-GI-Tract Cancer	6.78008	Primary Tumor
296	Non-GI-Tract Cancer	6.7595	Primary Tumor
297	Non-GI-Tract Cancer	6.77462	Primary Tumor
298	Non-GI-Tract Cancer	7.41494	Primary Tumor
299	Non-GI-Tract Cancer	7.23947	Primary Tumor
300	Non-GI-Tract Cancer	7.10575	Primary Tumor
301	Non-GI-Tract Cancer	6.44453	Primary Tumor
302	Non-GI-Tract Cancer	6.69902	Primary Tumor
303	Non-GI-Tract Cancer	7.1941	Primary Tumor
304	Non-GI-Tract Cancer	7.30006	Primary Tumor
305	Non-GI-Tract Cancer	7.06245	Primary Tumor
306	Non-GI-Tract Cancer	5.74887	Primary Tumor
307	Non-GI-Tract Cancer	7.17963	Primary Tumor
308	Non-GI-Tract Cancer	6.72815	Primary Tumor
309	Non-GI-Tract Cancer	6.2431	Primary Tumor
310	Non-GI-Tract Cancer	7.20837	Primary Tumor
311	Non-GI-Tract Cancer	6.0069	Primary Tumor
312	Non-GI-Tract Cancer	6.13433	Primary Tumor
313	Non-GI-Tract Cancer	6.54941	Primary Tumor
314	Non-GI-Tract Cancer	4.96987	Solid Tissue Normal
315	Non-GI-Tract Cancer	6.92488	Primary Tumor
316	Non-GI-Tract Cancer	5.97484	Primary Tumor
317	Non-GI-Tract Cancer	7.71066	Primary Tumor
318	Non-GI-Tract Cancer	6.44101	Primary Tumor
319	Non-GI-Tract Cancer	5.51935	Primary Tumor
320	Non-GI-Tract Cancer	6.12475	Primary Tumor
321	Non-GI-Tract Cancer	5.37025	Primary Tumor
322	Non-GI-Tract Cancer	6.29004	Primary Tumor
323	Non-GI-Tract Cancer	6.35742	Primary Tumor
324	Non-GI-Tract Cancer	6.27268	Primary Tumor
325	Non-GI-Tract Cancer	6.14392	Primary Tumor
326	Non-GI-Tract Cancer	7.05205	Primary Tumor
327	Non-GI-Tract Cancer	5.26972	Primary Tumor
328	Non-GI-Tract Cancer	6.22921	Primary Tumor
329	Non-GI-Tract Cancer	5.50899	Primary Tumor
330	Non-GI-Tract Cancer	7.48634	Primary Tumor
331	Non-GI-Tract Cancer	6.04851	Primary Tumor
332	Non-GI-Tract Cancer	6.76603	Primary Tumor
333	Non-GI-Tract Cancer	6.89686	Primary Tumor
334	Non-GI-Tract Cancer	6.53969	Primary Tumor
335	Non-GI-Tract Cancer	7.40607	Primary Tumor
336	Non-GI-Tract Cancer	5.76811	Primary Tumor
337	Non-GI-Tract Cancer	6.65286	Primary Tumor
338	Non-GI-Tract Cancer	6.64775	Primary Tumor
339	Non-GI-Tract Cancer	6.27205	Primary Tumor
340	Non-GI-Tract Cancer	5.95631	Primary Tumor
341	Non-GI-Tract Cancer	6.00733	Primary Tumor
342	Non-GI-Tract Cancer	7.15566	Primary Tumor
343	Non-GI-Tract Cancer	6.41022	Primary Tumor
344	Non-GI-Tract Cancer	6.29464	Primary Tumor
345	Non-GI-Tract Cancer	6.6182	Primary Tumor
346	Non-GI-Tract Cancer	6.22347	Primary Tumor
347	Non-GI-Tract Cancer	5.5265	Primary Tumor
348	Non-GI-Tract Cancer	6.55087	Primary Tumor
349	Non-GI-Tract Cancer	6.1172	Primary Tumor
350	Non-GI-Tract Cancer	5.80372	Primary Tumor
351	Non-GI-Tract Cancer	6.46305	Primary Tumor
352	Non-GI-Tract Cancer	7.34696	Primary Tumor
353	Non-GI-Tract Cancer	5.8478	Primary Tumor
354	Non-GI-Tract Cancer	6.48334	Primary Tumor
355	Non-GI-Tract Cancer	6.59838	Primary Tumor
356	Non-GI-Tract Cancer	5.95655	Primary Tumor
357	Non-GI-Tract Cancer	6.37172	Primary Tumor
358	Non-GI-Tract Cancer	5.85593	Primary Tumor
359	Non-GI-Tract Cancer	7.18853	Primary Tumor
360	Non-GI-Tract Cancer	7.42593	Primary Tumor
361	Non-GI-Tract Cancer	6.02959	Primary Tumor
362	Non-GI-Tract Cancer	6.49881	Primary Tumor
363	Non-GI-Tract Cancer	6.07817	Primary Tumor
364	Non-GI-Tract Cancer	5.391	Primary Tumor
365	Non-GI-Tract Cancer	6.5304	Primary Tumor
366	Non-GI-Tract Cancer	6.39565	Primary Tumor
367	Non-GI-Tract Cancer	4.31992	Primary Tumor
368	Non-GI-Tract Cancer	5.77612	Primary Tumor
369	Non-GI-Tract Cancer	6.49113	Primary Tumor
370	Non-GI-Tract Cancer	5.70648	Primary Tumor
371	Non-GI-Tract Cancer	6.01049	Primary Tumor
372	Non-GI-Tract Cancer	5.9841	Primary Tumor
373	Non-GI-Tract Cancer	5.66097	Primary Tumor
374	Non-GI-Tract Cancer	6.63354	Primary Tumor
375	Non-GI-Tract Cancer	6.01295	Primary Tumor
376	Non-GI-Tract Cancer	6.65593	Primary Tumor
377	Non-GI-Tract Cancer	7.41657	Primary Tumor
378	Non-GI-Tract Cancer	7.01702	Primary Tumor
379	Non-GI-Tract Cancer	7.13126	Solid Tissue Normal
380	Non-GI-Tract Cancer	6.8054	Primary Tumor
381	Non-GI-Tract Cancer	6.21285	Primary Tumor
382	Non-GI-Tract Cancer	6.1877	Primary Tumor
383	Non-GI-Tract Cancer	7.1664	Primary Tumor
384	Non-GI-Tract Cancer	6.21981	Primary Tumor
385	Non-GI-Tract Cancer	5.5077	Primary Tumor
386	Non-GI-Tract Cancer	5.69814	Primary Tumor
387	Non-GI-Tract Cancer	5.54527	Primary Tumor
388	Non-GI-Tract Cancer	7.57431	Primary Tumor
389	Non-GI-Tract Cancer	6.79991	Primary Tumor
390	Non-GI-Tract Cancer	7.43226	Primary Tumor
391	Non-GI-Tract Cancer	6.75256	Primary Tumor
392	Non-GI-Tract Cancer	5.71382	Primary Tumor
393	Non-GI-Tract Cancer	6.00092	Primary Tumor
394	Non-GI-Tract Cancer	7.53312	Primary Tumor
395	Non-GI-Tract Cancer	7.39843	Primary Tumor
396	Non-GI-Tract Cancer	6.54019	Primary Tumor
397	Non-GI-Tract Cancer	6.59194	Primary Tumor
398	Non-GI-Tract Cancer	6.27883	Primary Tumor
399	Non-GI-Tract Cancer	7.42234	Primary Tumor
400	Non-GI-Tract Cancer	6.40942	Primary Tumor
401	Non-GI-Tract Cancer	8.20186	Primary Tumor
402	Non-GI-Tract Cancer	6.68608	Primary Tumor
403	Non-GI-Tract Cancer	6.66215	Primary Tumor
404	Non-GI-Tract Cancer	6.62955	Primary Tumor
405	Non-GI-Tract Cancer	6.1975	Primary Tumor
406	Non-GI-Tract Cancer	7.14319	Primary Tumor
407	Non-GI-Tract Cancer	5.84047	Primary Tumor
408	Non-GI-Tract Cancer	7.05677	Primary Tumor
409	Non-GI-Tract Cancer	7.64484	Primary Tumor
410	Non-GI-Tract Cancer	6.11625	Primary Tumor
411	Non-GI-Tract Cancer	5.40691	Primary Tumor
412	Non-GI-Tract Cancer	7.24856	Primary Tumor
413	Non-GI-Tract Cancer	7.08025	Primary Tumor
414	Non-GI-Tract Cancer	5.49458	Primary Tumor
415	Non-GI-Tract Cancer	5.57161	Primary Tumor
416	Non-GI-Tract Cancer	6.48701	Primary Tumor
417	Non-GI-Tract Cancer	5.42105	Primary Tumor
418	Non-GI-Tract Cancer	6.27057	Primary Tumor
419	Non-GI-Tract Cancer	6.15482	Primary Tumor
420	Non-GI-Tract Cancer	5.47595	Primary Tumor
421	Non-GI-Tract Cancer	7.09035	Primary Tumor
422	Non-GI-Tract Cancer	6.13967	Primary Tumor
423	Non-GI-Tract Cancer	6.44489	Primary Tumor
424	Non-GI-Tract Cancer	5.44816	Primary Tumor
425	Non-GI-Tract Cancer	6.7515	Primary Tumor
426	Non-GI-Tract Cancer	5.89808	Primary Tumor
427	Non-GI-Tract Cancer	5.64048	Primary Tumor
428	Non-GI-Tract Cancer	6.47463	Primary Tumor
429	Non-GI-Tract Cancer	6.45627	Primary Tumor
430	Non-GI-Tract Cancer	6.55706	Primary Tumor
431	Non-GI-Tract Cancer	5.74864	Primary Tumor
432	Non-GI-Tract Cancer	6.77494	Primary Tumor
433	Non-GI-Tract Cancer	6.24182	Primary Tumor
434	Non-GI-Tract Cancer	5.47764	Primary Tumor
435	Non-GI-Tract Cancer	7.37395	Primary Tumor
436	Non-GI-Tract Cancer	7.03401	Primary Tumor
437	Non-GI-Tract Cancer	6.5442	Primary Tumor
438	Non-GI-Tract Cancer	6.57457	Primary Tumor
439	Non-GI-Tract Cancer	4.53871	Primary Tumor
440	Non-GI-Tract Cancer	6.33347	Primary Tumor
441	Non-GI-Tract Cancer	6.1352	Primary Tumor
442	Non-GI-Tract Cancer	5.89595	Primary Tumor
443	Non-GI-Tract Cancer	7.2556	Primary Tumor
444	Non-GI-Tract Cancer	5.45188	Primary Tumor
445	Non-GI-Tract Cancer	5.09948	Primary Tumor
446	Non-GI-Tract Cancer	6.27225	Primary Tumor
447	Non-GI-Tract Cancer	6.28065	Primary Tumor
448	Non-GI-Tract Cancer	4.01268	Primary Tumor
449	Non-GI-Tract Cancer	7.65381	Primary Tumor
450	Non-GI-Tract Cancer	6.61792	Primary Tumor
451	Non-GI-Tract Cancer	6.19735	Primary Tumor
452	Non-GI-Tract Cancer	5.64381	Primary Tumor
453	Non-GI-Tract Cancer	7.22987	Primary Tumor
454	Non-GI-Tract Cancer	6.36299	Primary Tumor
455	Non-GI-Tract Cancer	6.28217	Primary Tumor
456	Non-GI-Tract Cancer	5.9467	Primary Tumor
457	Non-GI-Tract Cancer	6.95129	Primary Tumor
458	Non-GI-Tract Cancer	6.09102	Primary Tumor
459	Non-GI-Tract Cancer	7.12878	Primary Tumor
460	Non-GI-Tract Cancer	5.06716	Primary Tumor
461	Non-GI-Tract Cancer	6.24673	Primary Tumor
462	Non-GI-Tract Cancer	6.96629	Primary Tumor
463	Non-GI-Tract Cancer	6.84996	Primary Tumor
464	Non-GI-Tract Cancer	6.6011	Primary Tumor
465	Non-GI-Tract Cancer	6.09925	Primary Tumor
466	Non-GI-Tract Cancer	6.47463	Primary Tumor
467	Non-GI-Tract Cancer	6.57645	Primary Tumor
468	Non-GI-Tract Cancer	6.8273	Primary Tumor
469	Non-GI-Tract Cancer	11.3667	Primary Tumor
470	Non-GI-Tract Cancer	6.71195	Primary Tumor
471	Non-GI-Tract Cancer	6.21641	Primary Tumor
472	Non-GI-Tract Cancer	6.95048	Primary Tumor
473	Non-GI-Tract Cancer	6.68405	Primary Tumor
474	Non-GI-Tract Cancer	6.56187	Primary Tumor
475	Non-GI-Tract Cancer	5.95398	Primary Tumor
476	Non-GI-Tract Cancer	5.75292	Primary Tumor
477	Non-GI-Tract Cancer	6.75357	Primary Tumor
478	Non-GI-Tract Cancer	5.72971	Solid Tissue Normal
479	Non-GI-Tract Cancer	6.29117	Primary Tumor
480	Non-GI-Tract Cancer	7.14747	Primary Tumor
481	Non-GI-Tract Cancer	6.07703	Primary Tumor
482	Non-GI-Tract Cancer	5.98781	Primary Tumor
483	Non-GI-Tract Cancer	5.8382	Primary Tumor
484	Non-GI-Tract Cancer	6.02715	Primary Tumor
485	Non-GI-Tract Cancer	7.57407	Primary Tumor
486	Non-GI-Tract Cancer	5.45559	Solid Tissue Normal
487	Non-GI-Tract Cancer	6.68625	Primary Tumor
488	Non-GI-Tract Cancer	6.10506	Primary Tumor
489	Non-GI-Tract Cancer	6.79253	Primary Tumor
490	Non-GI-Tract Cancer	5.92598	Primary Tumor
491	Non-GI-Tract Cancer	6.63001	Primary Tumor
492	Non-GI-Tract Cancer	5.40825	Primary Tumor
493	Non-GI-Tract Cancer	5.87395	Primary Tumor
494	Non-GI-Tract Cancer	6.59721	Primary Tumor
495	Non-GI-Tract Cancer	6.62118	Primary Tumor
496	Non-GI-Tract Cancer	6.42545	Primary Tumor
497	Non-GI-Tract Cancer	6.73322	Primary Tumor
498	Non-GI-Tract Cancer	6.02941	Primary Tumor
499	Non-GI-Tract Cancer	6.65211	Primary Tumor
500	Non-GI-Tract Cancer	6.62182	Primary Tumor
501	Non-GI-Tract Cancer	6.24201	Primary Tumor
502	Non-GI-Tract Cancer	7.22998	Primary Tumor
503	Non-GI-Tract Cancer	5.27583	Primary Tumor
504	Non-GI-Tract Cancer	5.22657	Primary Tumor
505	Non-GI-Tract Cancer	5.48518	Primary Tumor
506	Non-GI-Tract Cancer	6.32327	Primary Tumor
507	Non-GI-Tract Cancer	7.46493	Primary Tumor
508	Non-GI-Tract Cancer	5.69873	Primary Tumor
509	Non-GI-Tract Cancer	6.31854	Primary Tumor
510	Non-GI-Tract Cancer	6.70119	Primary Tumor
511	Non-GI-Tract Cancer	5.36764	Primary Tumor
512	Non-GI-Tract Cancer	6.43352	Primary Tumor
513	Non-GI-Tract Cancer	5.63663	Primary Tumor
514	Non-GI-Tract Cancer	7.05141	Primary Tumor
515	Non-GI-Tract Cancer	6.70554	Primary Tumor
516	Non-GI-Tract Cancer	6.47463	Primary Tumor
517	Non-GI-Tract Cancer	6.76379	Primary Tumor
518	Non-GI-Tract Cancer	6.52854	Primary Tumor
519	Non-GI-Tract Cancer	6.27755	Primary Tumor
520	Non-GI-Tract Cancer	7.44493	Primary Tumor
521	Non-GI-Tract Cancer	6.89935	Primary Tumor
522	Non-GI-Tract Cancer	6.38672	Primary Tumor
523	Non-GI-Tract Cancer	6.53635	Primary Tumor
524	Non-GI-Tract Cancer	7.35894	Primary Tumor
525	Non-GI-Tract Cancer	6.78409	Primary Tumor
526	Non-GI-Tract Cancer	5.95189	Primary Tumor
527	Non-GI-Tract Cancer	5.78073	Primary Tumor
528	Non-GI-Tract Cancer	5.979	Primary Tumor
529	Non-GI-Tract Cancer	5.93244	Primary Tumor
530	Non-GI-Tract Cancer	6.66421	Primary Tumor
531	Non-GI-Tract Cancer	6.05224	Primary Tumor
532	Non-GI-Tract Cancer	7.26398	Primary Tumor
533	Non-GI-Tract Cancer	6.44159	Primary Tumor
534	Non-GI-Tract Cancer	6.27876	Primary Tumor
535	Non-GI-Tract Cancer	6.50299	Primary Tumor
536	Non-GI-Tract Cancer	6.98847	Primary Tumor
537	Non-GI-Tract Cancer	6.61526	Primary Tumor
538	Non-GI-Tract Cancer	6.63608	Primary Tumor
539	Non-GI-Tract Cancer	7.18473	Primary Tumor
540	Non-GI-Tract Cancer	6.29165	Primary Tumor
541	Non-GI-Tract Cancer	6.36644	Primary Tumor
542	Non-GI-Tract Cancer	6.03652	Primary Tumor
543	Non-GI-Tract Cancer	7.01069	Primary Tumor
544	Non-GI-Tract Cancer	5.92415	Primary Tumor
545	Non-GI-Tract Cancer	5.65278	Primary Tumor
546	Non-GI-Tract Cancer	5.70526	Primary Tumor
547	Non-GI-Tract Cancer	6.50016	Primary Tumor
548	Non-GI-Tract Cancer	7.10955	Primary Tumor
549	Non-GI-Tract Cancer	6.66913	Primary Tumor
550	Non-GI-Tract Cancer	6.66782	Primary Tumor
551	Non-GI-Tract Cancer	7.43665	Primary Tumor
552	Non-GI-Tract Cancer	6.1484	Primary Tumor
553	Non-GI-Tract Cancer	6.22326	Primary Tumor
554	Non-GI-Tract Cancer	7.49507	Primary Tumor
555	Non-GI-Tract Cancer	6.15885	Primary Tumor
556	Non-GI-Tract Cancer	6.06412	Primary Tumor
557	Non-GI-Tract Cancer	6.00998	Primary Tumor
558	Non-GI-Tract Cancer	6.10096	Primary Tumor
559	Non-GI-Tract Cancer	6.54129	Primary Tumor
560	Non-GI-Tract Cancer	6.5391	Primary Tumor
561	Non-GI-Tract Cancer	6.96879	Primary Tumor
562	Non-GI-Tract Cancer	5.37312	Primary Tumor
563	Non-GI-Tract Cancer	5.76057	Primary Tumor
564	Non-GI-Tract Cancer	5.98993	Primary Tumor
565	Non-GI-Tract Cancer	6.39071	Primary Tumor
566	Non-GI-Tract Cancer	6.12009	Primary Tumor
567	Non-GI-Tract Cancer	5.96126	Primary Tumor
568	Non-GI-Tract Cancer	6.32965	Primary Tumor
569	Non-GI-Tract Cancer	6.79744	Primary Tumor
570	Non-GI-Tract Cancer	6.32438	Primary Tumor
571	Non-GI-Tract Cancer	6.88767	Primary Tumor
572	Non-GI-Tract Cancer	5.95551	Primary Tumor
573	Non-GI-Tract Cancer	6.87218	Primary Tumor
574	Non-GI-Tract Cancer	7.70645	Primary Tumor
575	Non-GI-Tract Cancer	6.93385	Primary Tumor
576	Non-GI-Tract Cancer	6.02984	Primary Tumor
577	Non-GI-Tract Cancer	6.90007	Primary Tumor
578	Non-GI-Tract Cancer	7.19583	Primary Tumor
579	Non-GI-Tract Cancer	7.16337	Primary Tumor
580	Non-GI-Tract Cancer	8.36597	Primary Tumor
581	Non-GI-Tract Cancer	6.22858	Primary Tumor
582	Non-GI-Tract Cancer	6.60674	Primary Tumor
583	Non-GI-Tract Cancer	6.36395	Primary Tumor
584	Non-GI-Tract Cancer	5.85947	Primary Tumor
585	Non-GI-Tract Cancer	5.73058	Primary Tumor
586	Non-GI-Tract Cancer	5.3578	Primary Tumor
587	Non-GI-Tract Cancer	7.0727	Primary Tumor
588	Non-GI-Tract Cancer	6.69307	Primary Tumor
589	Non-GI-Tract Cancer	5.86431	Primary Tumor
590	Non-GI-Tract Cancer	6.11315	Primary Tumor
591	Non-GI-Tract Cancer	5.87855	Primary Tumor
592	Non-GI-Tract Cancer	6.88139	Primary Tumor
593	Non-GI-Tract Cancer	6.4691	Primary Tumor
594	Non-GI-Tract Cancer	6.50859	Primary Tumor
595	Non-GI-Tract Cancer	5.82231	Primary Tumor
596	Non-GI-Tract Cancer	7.32635	Primary Tumor
597	Non-GI-Tract Cancer	6.03798	Primary Tumor
598	Non-GI-Tract Cancer	6.87689	Primary Tumor
599	Non-GI-Tract Cancer	6.97239	Primary Tumor
600	Non-GI-Tract Cancer	7.6897	Primary Tumor
601	Non-GI-Tract Cancer	5.6339	Primary Tumor
602	Non-GI-Tract Cancer	6.66523	Primary Tumor
603	Non-GI-Tract Cancer	6.3106	Primary Tumor
604	Non-GI-Tract Cancer	6.04472	Primary Tumor
605	Non-GI-Tract Cancer	7.15517	Primary Tumor
606	Non-GI-Tract Cancer	6.14183	Primary Tumor
607	Non-GI-Tract Cancer	6.44499	Primary Tumor
608	Non-GI-Tract Cancer	5.01912	Primary Tumor
609	Non-GI-Tract Cancer	6.4269	Primary Tumor
610	Non-GI-Tract Cancer	5.55391	Primary Tumor
611	Non-GI-Tract Cancer	6.68147	Primary Tumor
612	Non-GI-Tract Cancer	6.93072	Primary Tumor
613	Non-GI-Tract Cancer	6.38783	Primary Tumor
614	Non-GI-Tract Cancer	6.49971	Primary Tumor
615	Non-GI-Tract Cancer	7.13425	Primary Tumor
616	Non-GI-Tract Cancer	5.39943	Primary Tumor
617	Non-GI-Tract Cancer	6.65256	Primary Tumor
618	Non-GI-Tract Cancer	6.00015	Primary Tumor
619	Non-GI-Tract Cancer	8.0967	Primary Tumor
620	Non-GI-Tract Cancer	6.93447	Primary Tumor
621	Non-GI-Tract Cancer	7.00206	Primary Tumor
622	Non-GI-Tract Cancer	7.2708	Primary Tumor
623	Non-GI-Tract Cancer	6.08706	Primary Tumor
624	Non-GI-Tract Cancer	6.5903	Primary Tumor
625	Non-GI-Tract Cancer	6.04609	Primary Tumor
626	Non-GI-Tract Cancer	6.72583	Primary Tumor
627	Non-GI-Tract Cancer	6.69959	Primary Tumor
628	Non-GI-Tract Cancer	5.68657	Primary Tumor
629	Non-GI-Tract Cancer	6.22221	Primary Tumor
630	Non-GI-Tract Cancer	6.14441	Primary Tumor
631	Non-GI-Tract Cancer	6.30217	Primary Tumor
632	Non-GI-Tract Cancer	5.47442	Primary Tumor
633	Non-GI-Tract Cancer	6.87547	Primary Tumor
634	Non-GI-Tract Cancer	6.11547	Primary Tumor
635	Non-GI-Tract Cancer	5.87915	Primary Tumor
636	Non-GI-Tract Cancer	6.60975	Primary Tumor
637	Non-GI-Tract Cancer	7.54242	Primary Tumor
638	Non-GI-Tract Cancer	5.89846	Primary Tumor
639	Non-GI-Tract Cancer	6.56848	Primary Tumor
640	Non-GI-Tract Cancer	6.20897	Primary Tumor
641	Non-GI-Tract Cancer	6.35576	Primary Tumor
642	Non-GI-Tract Cancer	6.14044	Primary Tumor
643	Non-GI-Tract Cancer	5.39475	Primary Tumor
644	Non-GI-Tract Cancer	6.8727	Primary Tumor
645	Non-GI-Tract Cancer	7.24263	Primary Tumor
646	Non-GI-Tract Cancer	7.26015	Primary Tumor
647	Non-GI-Tract Cancer	6.37708	Primary Tumor
648	Non-GI-Tract Cancer	5.86951	Primary Tumor
649	Non-GI-Tract Cancer	7.18165	Primary Tumor
650	Non-GI-Tract Cancer	5.61532	Primary Tumor
651	Non-GI-Tract Cancer	7.22651	Primary Tumor
652	Non-GI-Tract Cancer	6.15632	Primary Tumor
653	Non-GI-Tract Cancer	5.65138	Primary Tumor
654	Non-GI-Tract Cancer	6.75873	Primary Tumor
655	Non-GI-Tract Cancer	5.81533	Primary Tumor
656	Non-GI-Tract Cancer	5.65091	Primary Tumor
657	Non-GI-Tract Cancer	6.97664	Primary Tumor
658	Non-GI-Tract Cancer	5.8068	Primary Tumor
659	Non-GI-Tract Cancer	6.15997	Primary Tumor
660	Non-GI-Tract Cancer	6.49091	Primary Tumor
661	Non-GI-Tract Cancer	5.89278	Primary Tumor
662	Non-GI-Tract Cancer	5.88001	Primary Tumor
663	Non-GI-Tract Cancer	6.85207	Primary Tumor
664	Non-GI-Tract Cancer	6.0756	Primary Tumor
665	Non-GI-Tract Cancer	6.16225	Primary Tumor
666	Non-GI-Tract Cancer	6.10939	Primary Tumor
667	Non-GI-Tract Cancer	6.07939	Primary Tumor
668	Non-GI-Tract Cancer	6.8052	Primary Tumor
669	Non-GI-Tract Cancer	7.22456	Primary Tumor
670	Non-GI-Tract Cancer	4.61036	Solid Tissue Normal
671	Non-GI-Tract Cancer	6.48165	Primary Tumor
672	Non-GI-Tract Cancer	5.04392	Solid Tissue Normal
673	Non-GI-Tract Cancer	5.83724	Primary Tumor
674	Non-GI-Tract Cancer	6.50231	Primary Tumor
675	Non-GI-Tract Cancer	7.068	Primary Tumor
676	Non-GI-Tract Cancer	5.65028	Primary Tumor
677	Non-GI-Tract Cancer	6.40752	Primary Tumor
678	Non-GI-Tract Cancer	6.1432	Primary Tumor
679	Non-GI-Tract Cancer	6.95219	Primary Tumor
680	Non-GI-Tract Cancer	6.05982	Primary Tumor
681	Non-GI-Tract Cancer	5.95026	Primary Tumor
682	Non-GI-Tract Cancer	5.4985	Primary Tumor
683	Non-GI-Tract Cancer	6.14572	Primary Tumor
684	Non-GI-Tract Cancer	7.25457	Primary Tumor
685	Non-GI-Tract Cancer	6.15365	Primary Tumor
686	Non-GI-Tract Cancer	6.9356	Primary Tumor
687	Non-GI-Tract Cancer	6.59097	Primary Tumor
688	Non-GI-Tract Cancer	7.1691	Primary Tumor
689	Non-GI-Tract Cancer	6.07003	Primary Tumor
690	Non-GI-Tract Cancer	5.89645	Primary Tumor
691	Non-GI-Tract Cancer	6.32901	Primary Tumor
692	Non-GI-Tract Cancer	5.57401	Primary Tumor
693	Non-GI-Tract Cancer	6.26189	Primary Tumor
694	Non-GI-Tract Cancer	6.69832	Primary Tumor
695	Non-GI-Tract Cancer	6.51505	Primary Tumor
696	Non-GI-Tract Cancer	6.3929	Primary Tumor
697	Non-GI-Tract Cancer	5.89198	Primary Tumor
698	Non-GI-Tract Cancer	6.87375	Primary Tumor
699	Non-GI-Tract Cancer	6.1629	Primary Tumor
700	Non-GI-Tract Cancer	5.97184	Primary Tumor
701	Non-GI-Tract Cancer	6.20195	Primary Tumor
702	Non-GI-Tract Cancer	7.2331	Primary Tumor
703	Non-GI-Tract Cancer	5.62365	Primary Tumor
704	Non-GI-Tract Cancer	6.69957	Primary Tumor
705	Non-GI-Tract Cancer	7.28938	Primary Tumor
706	Non-GI-Tract Cancer	6.34261	Primary Tumor
707	Non-GI-Tract Cancer	6.50141	Primary Tumor
708	Non-GI-Tract Cancer	6.93953	Primary Tumor
709	Non-GI-Tract Cancer	6.6822	Primary Tumor
710	Non-GI-Tract Cancer	5.39375	Primary Tumor
711	Non-GI-Tract Cancer	7.12973	Primary Tumor
712	Non-GI-Tract Cancer	5.02443	Primary Tumor
713	Non-GI-Tract Cancer	6.35592	Primary Tumor
714	Non-GI-Tract Cancer	6.33733	Primary Tumor
715	Non-GI-Tract Cancer	6.27971	Primary Tumor
716	Non-GI-Tract Cancer	6.45262	Primary Tumor
717	Non-GI-Tract Cancer	6.91495	Primary Tumor
718	Non-GI-Tract Cancer	5.55048	Primary Tumor
719	Non-GI-Tract Cancer	6.15378	Primary Tumor
720	Non-GI-Tract Cancer	7.53666	Primary Tumor
721	Non-GI-Tract Cancer	7.02748	Primary Tumor
722	Non-GI-Tract Cancer	6.53564	Primary Tumor
723	Non-GI-Tract Cancer	6.76689	Primary Tumor
724	Non-GI-Tract Cancer	4.83274	Primary Tumor
725	Non-GI-Tract Cancer	7.00502	Primary Tumor
726	Non-GI-Tract Cancer	5.92431	Primary Tumor
727	Non-GI-Tract Cancer	7.61641	Primary Tumor
728	Non-GI-Tract Cancer	6.21473	Primary Tumor
729	Non-GI-Tract Cancer	5.54235	Primary Tumor
730	Non-GI-Tract Cancer	7.66843	Primary Tumor
731	Non-GI-Tract Cancer	7.39322	Primary Tumor
732	Non-GI-Tract Cancer	5.94873	Primary Tumor
733	Non-GI-Tract Cancer	5.70044	Primary Tumor
734	Non-GI-Tract Cancer	7.2163	Primary Tumor
735	Non-GI-Tract Cancer	6.10706	Primary Tumor
736	Non-GI-Tract Cancer	6.04118	Primary Tumor
737	Non-GI-Tract Cancer	6.348	Primary Tumor
738	Non-GI-Tract Cancer	7.48147	Primary Tumor
739	Non-GI-Tract Cancer	6.29986	Primary Tumor
740	Non-GI-Tract Cancer	5.65677	Primary Tumor
741	Non-GI-Tract Cancer	5.55116	Solid Tissue Normal
742	Non-GI-Tract Cancer	6.25926	Primary Tumor
743	Non-GI-Tract Cancer	6.33041	Primary Tumor
744	Non-GI-Tract Cancer	7.56601	Primary Tumor
745	Non-GI-Tract Cancer	6.4702	Primary Tumor
746	Non-GI-Tract Cancer	6.68465	Primary Tumor
747	Non-GI-Tract Cancer	6.45126	Primary Tumor
748	Non-GI-Tract Cancer	7.15221	Primary Tumor
749	Non-GI-Tract Cancer	6.52758	Primary Tumor
750	Non-GI-Tract Cancer	6.28113	Primary Tumor
751	Non-GI-Tract Cancer	5.51633	Primary Tumor
752	Non-GI-Tract Cancer	6.1122	Primary Tumor
753	Non-GI-Tract Cancer	5.95974	Primary Tumor
754	Non-GI-Tract Cancer	11.9671	Primary Tumor
755	Non-GI-Tract Cancer	6.0162	Primary Tumor
756	Non-GI-Tract Cancer	6.88743	Primary Tumor
757	Non-GI-Tract Cancer	4.74888	Solid Tissue Normal
758	Non-GI-Tract Cancer	6.5603	Primary Tumor
759	Non-GI-Tract Cancer	7.16204	Primary Tumor
760	Non-GI-Tract Cancer	6.43074	Primary Tumor
761	Non-GI-Tract Cancer	6.64865	Primary Tumor
762	Non-GI-Tract Cancer	5.77833	Primary Tumor
763	Non-GI-Tract Cancer	6.85593	Primary Tumor
764	Non-GI-Tract Cancer	6.54	Primary Tumor
765	Non-GI-Tract Cancer	6.19838	Primary Tumor
766	Non-GI-Tract Cancer	6.24797	Primary Tumor
767	Non-GI-Tract Cancer	6.23664	Primary Tumor
768	Non-GI-Tract Cancer	6.66262	Primary Tumor
769	Non-GI-Tract Cancer	6.24101	Primary Tumor
770	Non-GI-Tract Cancer	6.86315	Primary Tumor
771	Non-GI-Tract Cancer	6.57801	Primary Tumor
772	Non-GI-Tract Cancer	6.20657	Primary Tumor
773	Non-GI-Tract Cancer	5.50396	Solid Tissue Normal
774	Non-GI-Tract Cancer	6.85551	Primary Tumor
775	Non-GI-Tract Cancer	6.9554	Primary Tumor
776	Non-GI-Tract Cancer	6.64094	Primary Tumor
777	Non-GI-Tract Cancer	5.91632	Primary Tumor
778	Non-GI-Tract Cancer	6.311	Primary Tumor
779	Non-GI-Tract Cancer	6.09791	Primary Tumor
780	Non-GI-Tract Cancer	6.38475	Primary Tumor
781	Non-GI-Tract Cancer	7.48662	Primary Tumor
782	Non-GI-Tract Cancer	7.07042	Primary Tumor
783	Non-GI-Tract Cancer	6.2554	Primary Tumor
784	Non-GI-Tract Cancer	6.57871	Primary Tumor
785	Non-GI-Tract Cancer	5.51269	Primary Tumor
786	Non-GI-Tract Cancer	5.78116	Primary Tumor
787	Non-GI-Tract Cancer	6.56519	Primary Tumor
788	Non-GI-Tract Cancer	7.63431	Primary Tumor
789	Non-GI-Tract Cancer	5.9984	Primary Tumor
790	Non-GI-Tract Cancer	6.48212	Primary Tumor
791	Non-GI-Tract Cancer	6.38438	Primary Tumor
792	Non-GI-Tract Cancer	6.95843	Primary Tumor
793	Non-GI-Tract Cancer	5.92921	Primary Tumor
794	Non-GI-Tract Cancer	5.93049	Primary Tumor
795	Non-GI-Tract Cancer	6.45174	Primary Tumor
796	Non-GI-Tract Cancer	6.36051	Primary Tumor
797	Non-GI-Tract Cancer	6.34048	Primary Tumor
798	Non-GI-Tract Cancer	6.47822	Primary Tumor
799	Non-GI-Tract Cancer	6.23953	Primary Tumor
800	Non-GI-Tract Cancer	6.35959	Primary Tumor
801	Non-GI-Tract Cancer	7.07431	Primary Tumor
802	Non-GI-Tract Cancer	5.69097	Primary Tumor
803	Non-GI-Tract Cancer	6.99471	Primary Tumor
804	Non-GI-Tract Cancer	6.83306	Primary Tumor
805	Non-GI-Tract Cancer	6.31887	Primary Tumor
806	Non-GI-Tract Cancer	6.47532	Primary Tumor
807	Non-GI-Tract Cancer	7.19981	Primary Tumor
808	Non-GI-Tract Cancer	6.44624	Primary Tumor
809	Non-GI-Tract Cancer	7.57179	Primary Tumor
810	Non-GI-Tract Cancer	6.17112	Primary Tumor
811	Non-GI-Tract Cancer	5.71076	Primary Tumor
812	Non-GI-Tract Cancer	5.68301	Primary Tumor
813	Non-GI-Tract Cancer	6.29648	Primary Tumor
814	Non-GI-Tract Cancer	6.48442	Primary Tumor
815	Non-GI-Tract Cancer	5.73859	Primary Tumor
816	Non-GI-Tract Cancer	5.90541	Primary Tumor
817	Non-GI-Tract Cancer	5.8391	Primary Tumor
818	Non-GI-Tract Cancer	5.78747	Primary Tumor
819	Non-GI-Tract Cancer	6.91015	Primary Tumor
820	Non-GI-Tract Cancer	6.31057	Primary Tumor
821	Non-GI-Tract Cancer	6.71088	Primary Tumor
822	Non-GI-Tract Cancer	6.87555	Primary Tumor
823	Non-GI-Tract Cancer	5.63448	Primary Tumor
824	Non-GI-Tract Cancer	6.77796	Primary Tumor
825	Non-GI-Tract Cancer	6.86836	Primary Tumor
826	Non-GI-Tract Cancer	11.19	Primary Tumor
827	Non-GI-Tract Cancer	6.24505	Primary Tumor
828	Non-GI-Tract Cancer	5.61574	Primary Tumor
829	Non-GI-Tract Cancer	6.42043	Primary Tumor
830	Non-GI-Tract Cancer	6.67359	Primary Tumor
831	Non-GI-Tract Cancer	6.33268	Primary Tumor
832	Non-GI-Tract Cancer	5.37142	Primary Tumor
833	Non-GI-Tract Cancer	6.77565	Primary Tumor
834	Non-GI-Tract Cancer	7.13695	Primary Tumor
835	Non-GI-Tract Cancer	6.34658	Primary Tumor
836	Non-GI-Tract Cancer	5.92472	Primary Tumor
837	Non-GI-Tract Cancer	6.41534	Primary Tumor
838	Non-GI-Tract Cancer	7.24779	Primary Tumor
839	Non-GI-Tract Cancer	6.38945	Primary Tumor
840	Non-GI-Tract Cancer	6.3698	Primary Tumor
841	Non-GI-Tract Cancer	6.24985	Primary Tumor
842	Non-GI-Tract Cancer	6.24659	Primary Tumor
843	Non-GI-Tract Cancer	6.89064	Primary Tumor
844	Non-GI-Tract Cancer	6.25908	Primary Tumor
845	Non-GI-Tract Cancer	6.38795	Primary Tumor
846	Non-GI-Tract Cancer	6.99043	Primary Tumor
847	Non-GI-Tract Cancer	5.75451	Primary Tumor
848	Non-GI-Tract Cancer	7.08964	Primary Tumor
849	Non-GI-Tract Cancer	6.02459	Primary Tumor
850	Non-GI-Tract Cancer	6.28182	Primary Tumor
851	Non-GI-Tract Cancer	6.07189	Primary Tumor
852	Non-GI-Tract Cancer	7.05961	Primary Tumor
853	Non-GI-Tract Cancer	6.00053	Primary Tumor
854	Non-GI-Tract Cancer	6.61136	Primary Tumor
855	Non-GI-Tract Cancer	6.55021	Primary Tumor
856	Non-GI-Tract Cancer	5.29723	Primary Tumor
857	Non-GI-Tract Cancer	6.53311	Primary Tumor
858	Non-GI-Tract Cancer	6.0649	Primary Tumor
859	Non-GI-Tract Cancer	5.86482	Primary Tumor
860	Non-GI-Tract Cancer	4.97001	Primary Tumor
861	Non-GI-Tract Cancer	7.54577	Primary Tumor
862	Non-GI-Tract Cancer	6.51745	Primary Tumor
863	Non-GI-Tract Cancer	6.25574	Primary Tumor
864	Non-GI-Tract Cancer	6.55719	Primary Tumor
865	Non-GI-Tract Cancer	6.44282	Primary Tumor
866	Non-GI-Tract Cancer	6.54733	Primary Tumor
867	Non-GI-Tract Cancer	6.28427	Primary Tumor
868	Non-GI-Tract Cancer	5.32766	Primary Tumor
869	Non-GI-Tract Cancer	6.49638	Primary Tumor
870	Non-GI-Tract Cancer	6.24564	Primary Tumor
871	Non-GI-Tract Cancer	5.1693	Primary Tumor
872	Non-GI-Tract Cancer	5.45171	Primary Tumor
873	Non-GI-Tract Cancer	7.21064	Primary Tumor
874	Non-GI-Tract Cancer	6.09787	Primary Tumor
875	Non-GI-Tract Cancer	5.92178	Primary Tumor
876	Non-GI-Tract Cancer	5.14709	Primary Tumor
877	Non-GI-Tract Cancer	7.59794	Primary Tumor
878	Non-GI-Tract Cancer	5.98262	Primary Tumor
879	Non-GI-Tract Cancer	6.87878	Primary Tumor
880	Non-GI-Tract Cancer	6.58878	Primary Tumor
881	Non-GI-Tract Cancer	6.26619	Primary Tumor
882	Non-GI-Tract Cancer	6.88388	Primary Tumor
883	Non-GI-Tract Cancer	6.24087	Primary Tumor
884	Non-GI-Tract Cancer	6.89689	Primary Tumor
885	Non-GI-Tract Cancer	7.0274	Primary Tumor
886	Non-GI-Tract Cancer	5.98074	Primary Tumor
887	Non-GI-Tract Cancer	7.29147	Primary Tumor
888	Non-GI-Tract Cancer	5.97454	Primary Tumor
889	Non-GI-Tract Cancer	6.47647	Primary Tumor
890	Non-GI-Tract Cancer	6.12848	Primary Tumor
891	Non-GI-Tract Cancer	6.45019	Primary Tumor
892	Non-GI-Tract Cancer	6.15602	Primary Tumor
893	Non-GI-Tract Cancer	6.42601	Primary Tumor
894	Non-GI-Tract Cancer	6.80231	Primary Tumor
895	Non-GI-Tract Cancer	7.17106	Primary Tumor
896	Non-GI-Tract Cancer	7.24617	Primary Tumor
897	Non-GI-Tract Cancer	5.06274	Primary Tumor
898	Non-GI-Tract Cancer	7.31477	Primary Tumor
899	Non-GI-Tract Cancer	6.63619	Primary Tumor
900	Non-GI-Tract Cancer	6.5886	Primary Tumor
901	Non-GI-Tract Cancer	7.05638	Primary Tumor
902	Non-GI-Tract Cancer	6.01201	Primary Tumor
903	Non-GI-Tract Cancer	6.60332	Primary Tumor
904	Non-GI-Tract Cancer	5.91486	Primary Tumor
905	Non-GI-Tract Cancer	7.00871	Primary Tumor
906	Non-GI-Tract Cancer	7.87777	Primary Tumor
907	Non-GI-Tract Cancer	6.48731	Primary Tumor
908	Non-GI-Tract Cancer	6.42911	Primary Tumor
909	Non-GI-Tract Cancer	7.14302	Primary Tumor
910	Non-GI-Tract Cancer	7.57709	Primary Tumor
911	Non-GI-Tract Cancer	5.62002	Primary Tumor
912	Non-GI-Tract Cancer	6.73883	Primary Tumor
913	Non-GI-Tract Cancer	5.36058	Primary Tumor
914	Non-GI-Tract Cancer	6.21462	Primary Tumor
915	Non-GI-Tract Cancer	5.93028	Primary Tumor
916	Non-GI-Tract Cancer	5.92777	Primary Tumor
917	Non-GI-Tract Cancer	6.03667	Primary Tumor
918	Non-GI-Tract Cancer	6.91411	Primary Tumor
919	Non-GI-Tract Cancer	5.9478	Primary Tumor
920	Non-GI-Tract Cancer	7.03925	Primary Tumor
921	Non-GI-Tract Cancer	7.70778	Primary Tumor
922	Non-GI-Tract Cancer	6.43828	Primary Tumor
923	Non-GI-Tract Cancer	6.77079	Primary Tumor
924	Non-GI-Tract Cancer	6.32425	Primary Tumor
925	Non-GI-Tract Cancer	7.67921	Primary Tumor
926	Non-GI-Tract Cancer	6.03125	Primary Tumor
927	Non-GI-Tract Cancer	5.92192	Primary Tumor
928	Non-GI-Tract Cancer	5.86565	Primary Tumor
929	GI-Tract Cancer	5.24525	Primary Tumor
930	GI-Tract Cancer	5.8641	Primary Tumor
931	GI-Tract Cancer	5.47352	Primary Tumor
932	GI-Tract Cancer	5.64074	Primary Tumor
933	GI-Tract Cancer	6.6431	Primary Tumor
934	GI-Tract Cancer	5.72216	Primary Tumor
935	GI-Tract Cancer	7.15075	Primary Tumor
936	GI-Tract Cancer	5.8623	Solid Tissue Normal
937	GI-Tract Cancer	5.62145	Primary Tumor
938	GI-Tract Cancer	6.55633	Solid Tissue Normal
939	GI-Tract Cancer	6.51734	Solid Tissue Normal
940	GI-Tract Cancer	5.59096	Primary Tumor
941	GI-Tract Cancer	4.97739	Primary Tumor
942	GI-Tract Cancer	6.49274	Primary Tumor
943	GI-Tract Cancer	5.57369	Primary Tumor
944	GI-Tract Cancer	6.26199	Primary Tumor
945	GI-Tract Cancer	5.76101	Solid Tissue Normal
946	GI-Tract Cancer	5.53378	Primary Tumor
947	GI-Tract Cancer	5.25036	Primary Tumor
948	GI-Tract Cancer	5.84964	Solid Tissue Normal
949	GI-Tract Cancer	3.29593	Primary Tumor
950	GI-Tract Cancer	5.24725	Primary Tumor
951	GI-Tract Cancer	5.62177	Primary Tumor
952	GI-Tract Cancer	6.7172	Primary Tumor
953	GI-Tract Cancer	6.53956	Primary Tumor
954	GI-Tract Cancer	6.23811	Primary Tumor
955	GI-Tract Cancer	6.24908	Solid Tissue Normal
956	GI-Tract Cancer	6.59229	Solid Tissue Normal
957	GI-Tract Cancer	6.25922	Primary Tumor
958	GI-Tract Cancer	6.01585	Primary Tumor
959	GI-Tract Cancer	5.73947	Primary Tumor
960	GI-Tract Cancer	5.84996	Primary Tumor
961	GI-Tract Cancer	5.81295	Primary Tumor
962	GI-Tract Cancer	5.31658	Primary Tumor
963	GI-Tract Cancer	5.79614	Primary Tumor
964	GI-Tract Cancer	7.00519	Primary Tumor
965	GI-Tract Cancer	6.05354	Primary Tumor
966	GI-Tract Cancer	6.54819	Solid Tissue Normal
967	GI-Tract Cancer	5.8741	Primary Tumor
968	GI-Tract Cancer	6.79339	Solid Tissue Normal
969	GI-Tract Cancer	6.27115	Primary Tumor
970	GI-Tract Cancer	5.70789	Primary Tumor
971	GI-Tract Cancer	5.88492	Solid Tissue Normal
972	GI-Tract Cancer	5.77997	Primary Tumor
973	GI-Tract Cancer	4.93602	Primary Tumor
974	GI-Tract Cancer	5.72985	Primary Tumor
975	GI-Tract Cancer	6.11399	Primary Tumor
976	GI-Tract Cancer	5.89241	Primary Tumor
977	GI-Tract Cancer	5.7162	Primary Tumor
978	GI-Tract Cancer	6.07782	Primary Tumor
979	GI-Tract Cancer	6.01038	Primary Tumor
980	GI-Tract Cancer	5.46803	Primary Tumor
981	GI-Tract Cancer	8.06792	Primary Tumor
982	GI-Tract Cancer	6.14041	Solid Tissue Normal
983	GI-Tract Cancer	7.45299	Primary Tumor
984	GI-Tract Cancer	6.15017	Primary Tumor
985	GI-Tract Cancer	5.04364	Primary Tumor
986	GI-Tract Cancer	9.54137	Primary Tumor
987	GI-Tract Cancer	5.44478	Primary Tumor
988	GI-Tract Cancer	5.37971	Primary Tumor
989	GI-Tract Cancer	5.71411	Primary Tumor
990	GI-Tract Cancer	4.97457	Primary Tumor
991	GI-Tract Cancer	5.96443	Primary Tumor
992	GI-Tract Cancer	5.91858	Primary Tumor
993	GI-Tract Cancer	5.64461	Primary Tumor
994	GI-Tract Cancer	4.6649	Primary Tumor
995	GI-Tract Cancer	6.98393	Solid Tissue Normal
996	GI-Tract Cancer	6.87718	Solid Tissue Normal
997	GI-Tract Cancer	5.6452	Primary Tumor
998	GI-Tract Cancer	6.69661	Primary Tumor
999	GI-Tract Cancer	5.93227	Primary Tumor
1000	GI-Tract Cancer	8.50794	Primary Tumor
1001	GI-Tract Cancer	5.54018	Primary Tumor
1002	GI-Tract Cancer	5.27944	Primary Tumor
1003	GI-Tract Cancer	5.14165	Primary Tumor
1004	GI-Tract Cancer	6.21963	Primary Tumor
1005	GI-Tract Cancer	4.69249	Primary Tumor
1006	GI-Tract Cancer	5.61829	Primary Tumor
1007	GI-Tract Cancer	5.85903	Primary Tumor
1008	GI-Tract Cancer	4.78102	Primary Tumor
1009	GI-Tract Cancer	5.4203	Primary Tumor
1010	GI-Tract Cancer	7.23695	Primary Tumor
1011	GI-Tract Cancer	6.08101	Primary Tumor
1012	GI-Tract Cancer	6.10497	Primary Tumor
1013	GI-Tract Cancer	5.71205	Primary Tumor
1014	GI-Tract Cancer	5.66286	Solid Tissue Normal
1015	GI-Tract Cancer	6.17206	Primary Tumor
1016	GI-Tract Cancer	6.03445	Primary Tumor
1017	GI-Tract Cancer	5.63457	Primary Tumor
1018	GI-Tract Cancer	6.55689	Primary Tumor
1019	GI-Tract Cancer	5.65988	Primary Tumor
1020	GI-Tract Cancer	4.58338	Primary Tumor
1021	GI-Tract Cancer	7.9902	Primary Tumor
1022	GI-Tract Cancer	4.09826	Primary Tumor
1023	GI-Tract Cancer	5.5822	Primary Tumor
1024	GI-Tract Cancer	6.14664	Solid Tissue Normal
1025	GI-Tract Cancer	5.06318	Primary Tumor
1026	GI-Tract Cancer	6.44773	Primary Tumor
1027	GI-Tract Cancer	5.55706	Primary Tumor
1028	GI-Tract Cancer	5.6065	Primary Tumor
1029	GI-Tract Cancer	5.28239	Primary Tumor
1030	GI-Tract Cancer	6.64871	Primary Tumor
1031	GI-Tract Cancer	4.66919	Primary Tumor
1032	GI-Tract Cancer	5.91986	Primary Tumor
1033	GI-Tract Cancer	5.13047	Primary Tumor
1034	GI-Tract Cancer	4.49598	Primary Tumor
1035	GI-Tract Cancer	5.82919	Primary Tumor
1036	GI-Tract Cancer	7.33499	Solid Tissue Normal
1037	GI-Tract Cancer	5.52863	Solid Tissue Normal
1038	GI-Tract Cancer	6.25523	Primary Tumor
1039	GI-Tract Cancer	6.61563	Primary Tumor
1040	GI-Tract Cancer	4.97918	Primary Tumor
1041	GI-Tract Cancer	5.27712	Primary Tumor
1042	GI-Tract Cancer	5.64576	Primary Tumor
1043	GI-Tract Cancer	4.6165	Primary Tumor
1044	GI-Tract Cancer	5.76288	Primary Tumor
1045	GI-Tract Cancer	6.54724	Primary Tumor
1046	GI-Tract Cancer	6.30086	Primary Tumor
1047	GI-Tract Cancer	3.95236	Primary Tumor
1048	GI-Tract Cancer	6.93285	Primary Tumor
1049	GI-Tract Cancer	6.03238	Primary Tumor
1050	GI-Tract Cancer	5.26646	Primary Tumor
1051	GI-Tract Cancer	7.35158	Primary Tumor
1052	GI-Tract Cancer	5.5469	Primary Tumor
1053	GI-Tract Cancer	5.20528	Primary Tumor
1054	GI-Tract Cancer	6.17018	Primary Tumor
1055	GI-Tract Cancer	5.77293	Primary Tumor
1056	GI-Tract Cancer	6.80796	Primary Tumor
1057	GI-Tract Cancer	6.18232	Primary Tumor
1058	GI-Tract Cancer	5.42304	Primary Tumor
1059	GI-Tract Cancer	6.29522	Primary Tumor
1060	GI-Tract Cancer	3.72629	Primary Tumor
1061	GI-Tract Cancer	6.31322	Primary Tumor
1062	GI-Tract Cancer	6.50199	Primary Tumor
1063	GI-Tract Cancer	5.31155	Primary Tumor
1064	GI-Tract Cancer	6.24326	Primary Tumor
1065	GI-Tract Cancer	5.55547	Primary Tumor
1066	GI-Tract Cancer	6.86852	Primary Tumor
1067	GI-Tract Cancer	5.6723	Primary Tumor
1068	GI-Tract Cancer	6.12471	Solid Tissue Normal
1069	GI-Tract Cancer	5.60272	Primary Tumor
1070	GI-Tract Cancer	6.36851	Primary Tumor
1071	GI-Tract Cancer	5.92898	Primary Tumor
1072	GI-Tract Cancer	5.1613	Primary Tumor
1073	GI-Tract Cancer	6.07206	Primary Tumor
1074	GI-Tract Cancer	6.26001	Primary Tumor
1075	GI-Tract Cancer	6.00584	Primary Tumor
1076	GI-Tract Cancer	5.92898	Primary Tumor
1077	GI-Tract Cancer	6.54227	Primary Tumor
1078	GI-Tract Cancer	5.75644	Primary Tumor
1079	GI-Tract Cancer	5.89927	Solid Tissue Normal
1080	GI-Tract Cancer	4.60731	Solid Tissue Normal
1081	GI-Tract Cancer	6.87219	Solid Tissue Normal
1082	GI-Tract Cancer	7.26173	Primary Tumor
1083	GI-Tract Cancer	4.62832	Primary Tumor
1084	GI-Tract Cancer	6.93497	Primary Tumor
1085	GI-Tract Cancer	5.60299	Primary Tumor
1086	GI-Tract Cancer	5.45245	Primary Tumor
1087	GI-Tract Cancer	6.57359	Solid Tissue Normal
1088	GI-Tract Cancer	4.5415	Primary Tumor
1089	GI-Tract Cancer	6.05997	Primary Tumor
1090	GI-Tract Cancer	4.60003	Primary Tumor
1091	GI-Tract Cancer	6.42111	Primary Tumor
1092	GI-Tract Cancer	7.10465	Primary Tumor
1093	GI-Tract Cancer	6.72388	Primary Tumor
1094	GI-Tract Cancer	6.09462	Solid Tissue Normal
1095	GI-Tract Cancer	4.43753	Primary Tumor
1096	GI-Tract Cancer	6.04715	Primary Tumor
1097	GI-Tract Cancer	5.69232	Solid Tissue Normal
1098	GI-Tract Cancer	6.7105	Primary Tumor
1099	GI-Tract Cancer	3.36625	Primary Tumor
1100	GI-Tract Cancer	5.89258	Primary Tumor
1101	GI-Tract Cancer	6.61896	Primary Tumor
1102	GI-Tract Cancer	6.83113	Primary Tumor
1103	GI-Tract Cancer	6.37657	Primary Tumor
1104	GI-Tract Cancer	5.69256	Solid Tissue Normal
1105	GI-Tract Cancer	5.76335	Primary Tumor
1106	GI-Tract Cancer	9.4921	Solid Tissue Normal
1107	GI-Tract Cancer	6.60639	Primary Tumor
1108	GI-Tract Cancer	5.95477	Primary Tumor
1109	GI-Tract Cancer	4.83954	Primary Tumor
1110	GI-Tract Cancer	4.7771	Primary Tumor
1111	GI-Tract Cancer	3.28714	Primary Tumor
1112	GI-Tract Cancer	5.37306	Primary Tumor
1113	GI-Tract Cancer	6.50657	Solid Tissue Normal
1114	GI-Tract Cancer	5.96247	Primary Tumor
1115	GI-Tract Cancer	5.67261	Primary Tumor
1116	GI-Tract Cancer	6.5003	Primary Tumor
1117	GI-Tract Cancer	6.84113	Primary Tumor
1118	GI-Tract Cancer	6.34205	Primary Tumor
1119	GI-Tract Cancer	6.35485	Primary Tumor
1120	GI-Tract Cancer	6.04021	Primary Tumor
1121	GI-Tract Cancer	5.8508	Primary Tumor
1122	GI-Tract Cancer	6.48162	Primary Tumor
1123	GI-Tract Cancer	6.12187	Primary Tumor
1124	GI-Tract Cancer	6.46421	Solid Tissue Normal
1125	GI-Tract Cancer	7.03017	Primary Tumor
1126	GI-Tract Cancer	5.96714	Primary Tumor
1127	GI-Tract Cancer	6.29799	Primary Tumor
1128	GI-Tract Cancer	6.54963	Primary Tumor
1129	GI-Tract Cancer	6.20009	Primary Tumor
1130	GI-Tract Cancer	4.11852	Primary Tumor
1131	GI-Tract Cancer	5.76648	Primary Tumor
1132	GI-Tract Cancer	4.26849	Primary Tumor
1133	GI-Tract Cancer	2.21433	Primary Tumor
1134	GI-Tract Cancer	6.70879	Primary Tumor
1135	GI-Tract Cancer	6.63458	Primary Tumor
1136	GI-Tract Cancer	4.31632	Primary Tumor
1137	GI-Tract Cancer	6.02949	Primary Tumor
1138	GI-Tract Cancer	6.00981	Primary Tumor
1139	GI-Tract Cancer	7.98403	Primary Tumor
1140	GI-Tract Cancer	6.58161	Primary Tumor
1141	GI-Tract Cancer	6.56773	Primary Tumor
1142	GI-Tract Cancer	5.5904	Primary Tumor
1143	GI-Tract Cancer	6.73516	Primary Tumor
1144	GI-Tract Cancer	4.14804	Primary Tumor
1145	GI-Tract Cancer	5.27279	Primary Tumor
1146	GI-Tract Cancer	5.87618	Primary Tumor
1147	GI-Tract Cancer	9.9785	Primary Tumor
1148	GI-Tract Cancer	6.18958	Primary Tumor
1149	GI-Tract Cancer	5.38524	Solid Tissue Normal
1150	GI-Tract Cancer	5.16076	Solid Tissue Normal
1151	GI-Tract Cancer	5.49784	Solid Tissue Normal
1152	GI-Tract Cancer	6.72422	Primary Tumor
1153	GI-Tract Cancer	7.11429	Primary Tumor
1154	GI-Tract Cancer	6.06921	Primary Tumor
1155	GI-Tract Cancer	6.43181	Primary Tumor
1156	GI-Tract Cancer	4.12933	Primary Tumor
1157	GI-Tract Cancer	6.12973	Solid Tissue Normal
1158	GI-Tract Cancer	4.60129	Primary Tumor
1159	GI-Tract Cancer	4.60553	Primary Tumor
1160	GI-Tract Cancer	5.50835	Primary Tumor
1161	GI-Tract Cancer	6.29678	Primary Tumor
1162	GI-Tract Cancer	5.88096	Primary Tumor
1163	GI-Tract Cancer	6.12919	Primary Tumor
1164	GI-Tract Cancer	5.28896	Primary Tumor
1165	GI-Tract Cancer	6.74573	Primary Tumor
1166	GI-Tract Cancer	6.40548	Primary Tumor
1167	GI-Tract Cancer	6.63933	Solid Tissue Normal
1168	GI-Tract Cancer	5.47151	Primary Tumor
1169	GI-Tract Cancer	3.97865	Primary Tumor
1170	GI-Tract Cancer	6.12332	Primary Tumor
1171	GI-Tract Cancer	4.98849	Primary Tumor
1172	GI-Tract Cancer	5.83713	Solid Tissue Normal
1173	GI-Tract Cancer	7.37838	Primary Tumor
1174	GI-Tract Cancer	6.13034	Solid Tissue Normal
1175	GI-Tract Cancer	7.03757	Primary Tumor
1176	GI-Tract Cancer	5.98192	Primary Tumor
1177	GI-Tract Cancer	5.51125	Primary Tumor
1178	GI-Tract Cancer	5.97842	Primary Tumor
1179	GI-Tract Cancer	4.67119	Primary Tumor
1180	GI-Tract Cancer	5.94229	Solid Tissue Normal
1181	GI-Tract Cancer	5.10319	Primary Tumor
1182	GI-Tract Cancer	6.26114	Primary Tumor
1183	GI-Tract Cancer	6.68232	Primary Tumor
1184	GI-Tract Cancer	3.52769	Primary Tumor
1185	GI-Tract Cancer	6.54214	Primary Tumor
1186	GI-Tract Cancer	5.9216	Primary Tumor
1187	GI-Tract Cancer	5.29218	Primary Tumor
1188	GI-Tract Cancer	7.22318	Solid Tissue Normal
1189	GI-Tract Cancer	6.26257	Primary Tumor
1190	GI-Tract Cancer	6.55871	Primary Tumor
1191	GI-Tract Cancer	5.31582	Primary Tumor
1192	GI-Tract Cancer	6.59134	Primary Tumor
1193	GI-Tract Cancer	6.51157	Primary Tumor
1194	GI-Tract Cancer	5.07582	Primary Tumor
1195	GI-Tract Cancer	10.7869	Primary Tumor
1196	GI-Tract Cancer	5.51607	Solid Tissue Normal
1197	GI-Tract Cancer	7.13098	Primary Tumor
1198	GI-Tract Cancer	5.9923	Primary Tumor
1199	GI-Tract Cancer	6.5125	Primary Tumor
1200	GI-Tract Cancer	7.00575	Solid Tissue Normal
1201	GI-Tract Cancer	5.2887	Primary Tumor
1202	GI-Tract Cancer	5.68315	Primary Tumor
1203	GI-Tract Cancer	6.18852	Primary Tumor
1204	GI-Tract Cancer	5.86769	Primary Tumor
1205	GI-Tract Cancer	6.30588	Primary Tumor
1206	GI-Tract Cancer	6.37902	Primary Tumor
1207	GI-Tract Cancer	3.58651	Primary Tumor
1208	GI-Tract Cancer	6.53023	Primary Tumor
1209	GI-Tract Cancer	5.1193	Primary Tumor
1210	GI-Tract Cancer	4.80219	Solid Tissue Normal
1211	GI-Tract Cancer	6.62044	Solid Tissue Normal
1212	GI-Tract Cancer	6.05825	Primary Tumor
1213	GI-Tract Cancer	4.48232	Primary Tumor
1214	GI-Tract Cancer	6.04442	Primary Tumor
1215	GI-Tract Cancer	5.39996	Primary Tumor
1216	GI-Tract Cancer	6.27579	Primary Tumor
1217	GI-Tract Cancer	5.72036	Primary Tumor
1218	GI-Tract Cancer	5.06003	Primary Tumor
1219	GI-Tract Cancer	6.60321	Primary Tumor
1220	GI-Tract Cancer	4.85554	Primary Tumor
1221	GI-Tract Cancer	6.37368	Primary Tumor
1222	GI-Tract Cancer	5.48984	Primary Tumor
1223	GI-Tract Cancer	6.61868	Primary Tumor
1224	GI-Tract Cancer	4.92595	Primary Tumor
1225	GI-Tract Cancer	5.6288	Primary Tumor
1226	GI-Tract Cancer	2.97892	Primary Tumor
1227	GI-Tract Cancer	5.44268	Primary Tumor
1228	GI-Tract Cancer	7.34859	Solid Tissue Normal
1229	GI-Tract Cancer	6.02791	Primary Tumor
1230	GI-Tract Cancer	5.76604	Primary Tumor
1231	GI-Tract Cancer	5.14813	Solid Tissue Normal
1232	GI-Tract Cancer	5.44664	Primary Tumor
1233	GI-Tract Cancer	6.85394	Primary Tumor
1234	GI-Tract Cancer	5.89804	Primary Tumor
1235	GI-Tract Cancer	6.32716	Primary Tumor
1236	GI-Tract Cancer	5.31449	Primary Tumor
1237	GI-Tract Cancer	6.44394	Solid Tissue Normal
1238	GI-Tract Cancer	6.53322	Primary Tumor
1239	GI-Tract Cancer	5.86207	Primary Tumor
1240	GI-Tract Cancer	7.24868	Primary Tumor
1241	GI-Tract Cancer	6.54344	Primary Tumor
1242	GI-Tract Cancer	4.77585	Primary Tumor
1243	GI-Tract Cancer	6.7994	Primary Tumor
1244	GI-Tract Cancer	6.19181	Solid Tissue Normal
1245	GI-Tract Cancer	5.54262	Solid Tissue Normal
1246	GI-Tract Cancer	5.36397	Solid Tissue Normal
1247	GI-Tract Cancer	4.72161	Primary Tumor
1248	GI-Tract Cancer	6.62565	Primary Tumor
1249	GI-Tract Cancer	6.23838	Primary Tumor
1250	GI-Tract Cancer	6.60875	Primary Tumor
1251	GI-Tract Cancer	6.40454	Primary Tumor
1252	GI-Tract Cancer	6.8272	Primary Tumor
1253	GI-Tract Cancer	6.94142	Solid Tissue Normal
1254	GI-Tract Cancer	5.9934	Primary Tumor
1255	GI-Tract Cancer	6.12228	Solid Tissue Normal
1256	GI-Tract Cancer	5.6555	Solid Tissue Normal
1257	GI-Tract Cancer	5.41649	Primary Tumor
1258	GI-Tract Cancer	6.55203	Solid Tissue Normal
1259	GI-Tract Cancer	6.53579	Primary Tumor
1260	GI-Tract Cancer	5.63771	Primary Tumor
1261	GI-Tract Cancer	5.16919	Primary Tumor
1262	GI-Tract Cancer	5.65862	Primary Tumor
1263	GI-Tract Cancer	4.69738	Primary Tumor
1264	GI-Tract Cancer	5.88522	Primary Tumor
1265	GI-Tract Cancer	5.46592	Primary Tumor
1266	GI-Tract Cancer	6.87601	Primary Tumor
1267	GI-Tract Cancer	6.4267	Primary Tumor
1268	GI-Tract Cancer	8.29209	Primary Tumor
1269	GI-Tract Cancer	5.4825	Primary Tumor
1270	GI-Tract Cancer	5.3525	Primary Tumor
1271	GI-Tract Cancer	7.15781	Primary Tumor
1272	GI-Tract Cancer	5.76212	Primary Tumor
1273	GI-Tract Cancer	6.54818	Primary Tumor
1274	GI-Tract Cancer	7.2682	Primary Tumor
1275	GI-Tract Cancer	5.16093	Primary Tumor
1276	GI-Tract Cancer	5.13262	Primary Tumor
1277	GI-Tract Cancer	6.54524	Solid Tissue Normal
1278	GI-Tract Cancer	6.35441	Primary Tumor
1279	GI-Tract Cancer	6.65391	Solid Tissue Normal
1280	GI-Tract Cancer	6.8112	Primary Tumor
1281	GI-Tract Cancer	8.03673	Primary Tumor
1282	GI-Tract Cancer	5.64146	Primary Tumor
1283	GI-Tract Cancer	4.91192	Primary Tumor
1284	GI-Tract Cancer	6.379	Primary Tumor
1285	GI-Tract Cancer	4.92654	Primary Tumor
1286	GI-Tract Cancer	6.94648	Primary Tumor
1287	GI-Tract Cancer	6.28351	Primary Tumor
1288	GI-Tract Cancer	5.63019	Primary Tumor
1289	GI-Tract Cancer	6.58617	Primary Tumor
1290	GI-Tract Cancer	4.44453	Solid Tissue Normal
1291	GI-Tract Cancer	5.7657	Primary Tumor
1292	GI-Tract Cancer	7.42185	Solid Tissue Normal
1293	GI-Tract Cancer	5.71326	Primary Tumor
1294	GI-Tract Cancer	6.51953	Primary Tumor
1295	GI-Tract Cancer	6.04428	Solid Tissue Normal
1296	GI-Tract Cancer	6.28081	Primary Tumor
1297	GI-Tract Cancer	5.85166	Primary Tumor
1298	GI-Tract Cancer	4.56299	Primary Tumor
1299	GI-Tract Cancer	5.94221	Primary Tumor
1300	GI-Tract Cancer	5.99967	Primary Tumor
1301	GI-Tract Cancer	6.19016	Primary Tumor
1302	GI-Tract Cancer	6.58785	Primary Tumor
1303	GI-Tract Cancer	6.315	Primary Tumor
1304	GI-Tract Cancer	6.34113	Primary Tumor
1305	GI-Tract Cancer	4.86984	Primary Tumor
1306	GI-Tract Cancer	5.33843	Solid Tissue Normal
1307	GI-Tract Cancer	6.26305	Primary Tumor
1308	GI-Tract Cancer	6.09316	Primary Tumor
1309	GI-Tract Cancer	6.30267	Primary Tumor
1310	GI-Tract Cancer	6.03141	Solid Tissue Normal
1311	GI-Tract Cancer	6.44011	Solid Tissue Normal
1312	GI-Tract Cancer	5.72739	Primary Tumor
1313	GI-Tract Cancer	2.43868	Primary Tumor
1314	GI-Tract Cancer	5.8564	Primary Tumor
1315	GI-Tract Cancer	6.00263	Primary Tumor
1316	GI-Tract Cancer	6.33556	Primary Tumor
1317	GI-Tract Cancer	5.79771	Primary Tumor
1318	GI-Tract Cancer	6.31153	Primary Tumor
1319	GI-Tract Cancer	6.34203	Primary Tumor
1320	GI-Tract Cancer	5.30922	Primary Tumor
1321	GI-Tract Cancer	5.71728	Primary Tumor
1322	GI-Tract Cancer	5.78422	Primary Tumor
1323	GI-Tract Cancer	5.54656	Primary Tumor
1324	GI-Tract Cancer	5.5774	Primary Tumor
1325	GI-Tract Cancer	6.65859	Primary Tumor
1326	GI-Tract Cancer	5.4094	Primary Tumor
1327	GI-Tract Cancer	5.50268	Solid Tissue Normal
1328	GI-Tract Cancer	5.61821	Primary Tumor
1329	GI-Tract Cancer	6.49222	Primary Tumor
1330	GI-Tract Cancer	3.18384	Primary Tumor
1331	GI-Tract Cancer	6.02852	Primary Tumor
1332	GI-Tract Cancer	6.9242	Primary Tumor
1333	GI-Tract Cancer	4.27472	Primary Tumor
1334	GI-Tract Cancer	7.34016	Primary Tumor
1335	GI-Tract Cancer	6.71426	Solid Tissue Normal
1336	GI-Tract Cancer	7.3513	Primary Tumor
1337	GI-Tract Cancer	5.96608	Primary Tumor
1338	GI-Tract Cancer	5.68837	Primary Tumor
1339	GI-Tract Cancer	6.36608	Primary Tumor
1340	GI-Tract Cancer	6.64678	Primary Tumor
1341	GI-Tract Cancer	6.901	Primary Tumor
1342	GI-Tract Cancer	5.93962	Primary Tumor
1343	GI-Tract Cancer	5.64409	Primary Tumor
1344	GI-Tract Cancer	6.15382	Primary Tumor
1345	GI-Tract Cancer	4.88906	Primary Tumor
1346	GI-Tract Cancer	5.43494	Primary Tumor
1347	GI-Tract Cancer	6.08795	Primary Tumor
1348	GI-Tract Cancer	5.27251	Primary Tumor
1349	GI-Tract Cancer	6.50001	Primary Tumor
1350	GI-Tract Cancer	5.59886	Primary Tumor
1351	GI-Tract Cancer	6.50768	Primary Tumor
1352	GI-Tract Cancer	5.69318	Primary Tumor
1353	GI-Tract Cancer	6.00072	Primary Tumor
1354	GI-Tract Cancer	6.08019	Primary Tumor
1355	GI-Tract Cancer	6.66545	Solid Tissue Normal
1356	GI-Tract Cancer	6.74809	Primary Tumor
1357	GI-Tract Cancer	5.33308	Primary Tumor
1358	GI-Tract Cancer	4.48916	Primary Tumor
1359	GI-Tract Cancer	4.53999	Primary Tumor
1360	GI-Tract Cancer	3.0372	Primary Tumor
1361	GI-Tract Cancer	7.20379	Solid Tissue Normal
1362	GI-Tract Cancer	6.19546	Primary Tumor
1363	GI-Tract Cancer	5.86601	Primary Tumor
1364	GI-Tract Cancer	4.80702	Primary Tumor
1365	GI-Tract Cancer	6.43175	Primary Tumor
1366	GI-Tract Cancer	6.57355	Primary Tumor
1367	GI-Tract Cancer	5.11436	Primary Tumor
1368	GI-Tract Cancer	5.90719	Primary Tumor
1369	GI-Tract Cancer	6.90418	Primary Tumor
1370	GI-Tract Cancer	6.64579	Primary Tumor
1371	GI-Tract Cancer	6.54135	Primary Tumor
1372	GI-Tract Cancer	5.53011	Primary Tumor
1373	GI-Tract Cancer	4.2657	Primary Tumor
1374	GI-Tract Cancer	6.01462	Primary Tumor
1375	GI-Tract Cancer	6.65507	Solid Tissue Normal
1376	GI-Tract Cancer	6.09681	Primary Tumor
1377	GI-Tract Cancer	5.65891	Primary Tumor
1378	GI-Tract Cancer	5.27609	Primary Tumor
1379	GI-Tract Cancer	6.16518	Primary Tumor
1380	GI-Tract Cancer	6.22357	Solid Tissue Normal
1381	GI-Tract Cancer	6.08624	Solid Tissue Normal
1382	GI-Tract Cancer	4.07935	Primary Tumor
1383	GI-Tract Cancer	9.75236	Primary Tumor
1384	GI-Tract Cancer	6.13711	Primary Tumor
1385	GI-Tract Cancer	4.5694	Primary Tumor
1386	GI-Tract Cancer	7.15591	Primary Tumor
1387	GI-Tract Cancer	6.50505	Primary Tumor
1388	GI-Tract Cancer	7.5706	Primary Tumor
1389	GI-Tract Cancer	8.36912	Primary Tumor
1390	GI-Tract Cancer	4.47749	Primary Tumor
1391	GI-Tract Cancer	4.91308	Primary Tumor
1392	GI-Tract Cancer	2.57761	Primary Tumor
1393	GI-Tract Cancer	6.04576	Solid Tissue Normal
1394	GI-Tract Cancer	6.55755	Primary Tumor
1395	GI-Tract Cancer	6.95268	Primary Tumor
1396	GI-Tract Cancer	4.36974	Primary Tumor
1397	GI-Tract Cancer	6.47987	Solid Tissue Normal
1398	GI-Tract Cancer	7.23223	Primary Tumor
1399	GI-Tract Cancer	6.94328	Primary Tumor
1400	GI-Tract Cancer	4.54897	Primary Tumor
1401	GI-Tract Cancer	5.62325	Primary Tumor
1402	GI-Tract Cancer	6.19567	Primary Tumor
1403	GI-Tract Cancer	5.69461	Primary Tumor
1404	GI-Tract Cancer	5.33108	Solid Tissue Normal
1405	GI-Tract Cancer	3.89604	Primary Tumor
1406	GI-Tract Cancer	5.21412	Solid Tissue Normal
1407	GI-Tract Cancer	5.86185	Primary Tumor
1408	GI-Tract Cancer	6.74891	Primary Tumor
1409	GI-Tract Cancer	6.85046	Primary Tumor
1410	GI-Tract Cancer	6.27141	Primary Tumor
1411	GI-Tract Cancer	5.16515	Primary Tumor
1412	GI-Tract Cancer	5.30346	Solid Tissue Normal
1413	GI-Tract Cancer	6.48292	Primary Tumor
1414	GI-Tract Cancer	6.32966	Solid Tissue Normal
1415	GI-Tract Cancer	5.45697	Primary Tumor
1416	GI-Tract Cancer	6.22347	Primary Tumor
1417	GI-Tract Cancer	6.35037	Primary Tumor
1418	GI-Tract Cancer	5.12827	Primary Tumor
1419	GI-Tract Cancer	8.39834	Primary Tumor
1420	GI-Tract Cancer	8.31874	Solid Tissue Normal
1421	GI-Tract Cancer	6.71604	Primary Tumor
1422	GI-Tract Cancer	6.0702	Primary Tumor
1423	GI-Tract Cancer	9.92387	Primary Tumor
1424	GI-Tract Cancer	4.99128	Primary Tumor
1425	GI-Tract Cancer	4.71296	Primary Tumor
1426	GI-Tract Cancer	6.55805	Primary Tumor
1427	GI-Tract Cancer	8.83845	Primary Tumor
1428	GI-Tract Cancer	6.02166	Primary Tumor
1429	GI-Tract Cancer	8.8035	Primary Tumor
1430	GI-Tract Cancer	5.08235	Solid Tissue Normal
1431	GI-Tract Cancer	6.73585	Primary Tumor
1432	GI-Tract Cancer	6.12899	Primary Tumor
1433	GI-Tract Cancer	7.23891	Primary Tumor
1434	GI-Tract Cancer	4.9538	Primary Tumor
1435	GI-Tract Cancer	10.3845	Primary Tumor
1436	GI-Tract Cancer	10.9286	Primary Tumor
1437	GI-Tract Cancer	18.2371	Primary Tumor
1438	GI-Tract Cancer	4.1752	Primary Tumor
1439	GI-Tract Cancer	7.57447	Primary Tumor
1440	GI-Tract Cancer	7.13687	Primary Tumor
1441	GI-Tract Cancer	15.3862	Primary Tumor
1442	GI-Tract Cancer	7.73933	Primary Tumor
1443	GI-Tract Cancer	6.20546	Primary Tumor
1444	GI-Tract Cancer	7.03395	Primary Tumor
1445	GI-Tract Cancer	11.3656	Primary Tumor
1446	GI-Tract Cancer	6.39645	Primary Tumor
1447	GI-Tract Cancer	11.5414	Primary Tumor
1448	GI-Tract Cancer	5.48195	Primary Tumor
1449	GI-Tract Cancer	7.82909	Primary Tumor
1450	GI-Tract Cancer	6.99198	Primary Tumor
1451	GI-Tract Cancer	6.30451	Primary Tumor
1452	GI-Tract Cancer	6.41655	Primary Tumor
1453	GI-Tract Cancer	14.6624	Primary Tumor
1454	GI-Tract Cancer	5.93147	Primary Tumor
1455	GI-Tract Cancer	6.14565	Primary Tumor
1456	GI-Tract Cancer	4.84285	Primary Tumor
1457	GI-Tract Cancer	11.5733	Solid Tissue Normal
1458	GI-Tract Cancer	4.40775	Primary Tumor
1459	GI-Tract Cancer	4.94088	Primary Tumor
1460	GI-Tract Cancer	4.41665	Primary Tumor
1461	GI-Tract Cancer	5.48795	Primary Tumor
1462	GI-Tract Cancer	6.8582	Primary Tumor
1463	GI-Tract Cancer	17.1198	Primary Tumor
1464	GI-Tract Cancer	5.53167	Solid Tissue Normal
1465	GI-Tract Cancer	5.48818	Primary Tumor
1466	GI-Tract Cancer	6.05348	Primary Tumor
1467	GI-Tract Cancer	13.1539	Primary Tumor
1468	GI-Tract Cancer	17.8982	Primary Tumor
1469	GI-Tract Cancer	15.0836	Primary Tumor
1470	GI-Tract Cancer	5.91689	Primary Tumor
1471	GI-Tract Cancer	6.39193	Primary Tumor
1472	GI-Tract Cancer	9.3287	Primary Tumor
1473	GI-Tract Cancer	10.8042	Primary Tumor
1474	GI-Tract Cancer	5.30695	Primary Tumor
1475	GI-Tract Cancer	7.20248	Primary Tumor
1476	GI-Tract Cancer	16.112	Primary Tumor
1477	GI-Tract Cancer	9.83813	Primary Tumor
1478	GI-Tract Cancer	5.78567	Primary Tumor
1479	GI-Tract Cancer	5.54453	Primary Tumor
1480	GI-Tract Cancer	10.7931	Solid Tissue Normal
1481	GI-Tract Cancer	6.82477	Primary Tumor
1482	GI-Tract Cancer	5.96006	Primary Tumor
1483	GI-Tract Cancer	7.50768	Primary Tumor
1484	GI-Tract Cancer	6.52776	Primary Tumor
1485	GI-Tract Cancer	6.4955	Primary Tumor
1486	GI-Tract Cancer	6.9128	Primary Tumor
1487	GI-Tract Cancer	9.47606	Primary Tumor
1488	GI-Tract Cancer	6.05902	Primary Tumor
1489	GI-Tract Cancer	5.77292	Primary Tumor
1490	GI-Tract Cancer	5.06046	Primary Tumor
1491	GI-Tract Cancer	8.39667	Primary Tumor
1492	GI-Tract Cancer	7.08811	Primary Tumor
1493	GI-Tract Cancer	7.41147	Primary Tumor
1494	GI-Tract Cancer	9.04945	Primary Tumor
1495	GI-Tract Cancer	11.2628	Primary Tumor
1496	GI-Tract Cancer	9.51281	Primary Tumor
1497	GI-Tract Cancer	6.18436	Primary Tumor
1498	GI-Tract Cancer	6.54354	Primary Tumor
1499	GI-Tract Cancer	6.59473	Solid Tissue Normal
1500	GI-Tract Cancer	10.0104	Primary Tumor
1501	GI-Tract Cancer	5.40816	Primary Tumor
1502	GI-Tract Cancer	7.65646	Primary Tumor
1503	GI-Tract Cancer	6.30903	Primary Tumor
1504	GI-Tract Cancer	6.83632	Solid Tissue Normal
1505	GI-Tract Cancer	7.19176	Primary Tumor
1506	GI-Tract Cancer	5.95614	Primary Tumor
1507	GI-Tract Cancer	5.9747	Primary Tumor
1508	GI-Tract Cancer	4.99736	Primary Tumor
1509	GI-Tract Cancer	6.23801	Primary Tumor
1510	GI-Tract Cancer	11.4836	Primary Tumor
1511	GI-Tract Cancer	5.56679	Primary Tumor
1512	GI-Tract Cancer	14.0929	Primary Tumor
1513	GI-Tract Cancer	16.131	Primary Tumor
1514	GI-Tract Cancer	5.99238	Primary Tumor
1515	GI-Tract Cancer	15.3441	Primary Tumor
1516	GI-Tract Cancer	7.5412	Primary Tumor
1517	GI-Tract Cancer	6.21647	Primary Tumor
1518	GI-Tract Cancer	6.48332	Primary Tumor
1519	GI-Tract Cancer	3.98347	Solid Tissue Normal
1520	GI-Tract Cancer	4.88342	Primary Tumor
1521	GI-Tract Cancer	6.08723	Solid Tissue Normal
1522	GI-Tract Cancer	10.7078	Primary Tumor
1523	GI-Tract Cancer	8.84561	Primary Tumor
1524	GI-Tract Cancer	6.54691	Solid Tissue Normal
1525	GI-Tract Cancer	6.13724	Primary Tumor
1526	GI-Tract Cancer	5.89305	Primary Tumor
1527	GI-Tract Cancer	7.30715	Primary Tumor
1528	GI-Tract Cancer	4.98975	Primary Tumor
1529	GI-Tract Cancer	5.64351	Primary Tumor
1530	GI-Tract Cancer	10.9746	Primary Tumor
1531	GI-Tract Cancer	12.6746	Primary Tumor
1532	GI-Tract Cancer	6.88945	Primary Tumor
1533	GI-Tract Cancer	11.8414	Primary Tumor
1534	GI-Tract Cancer	5.74116	Primary Tumor
1535	GI-Tract Cancer	5.24954	Primary Tumor
1536	GI-Tract Cancer	5.39862	Primary Tumor
1537	GI-Tract Cancer	7.11646	Primary Tumor
1538	GI-Tract Cancer	5.30208	Primary Tumor
1539	GI-Tract Cancer	5.19868	Primary Tumor
1540	GI-Tract Cancer	7.89376	Primary Tumor
1541	GI-Tract Cancer	5.89556	Primary Tumor
1542	GI-Tract Cancer	5.74802	Primary Tumor
1543	GI-Tract Cancer	11.5392	Primary Tumor
1544	GI-Tract Cancer	5.2235	Primary Tumor
1545	GI-Tract Cancer	15.3955	Primary Tumor
1546	GI-Tract Cancer	6.46537	Primary Tumor
1547	GI-Tract Cancer	6.30611	Primary Tumor
1548	GI-Tract Cancer	7.93421	Primary Tumor
1549	GI-Tract Cancer	7.69665	Primary Tumor
1550	GI-Tract Cancer	7.78239	Primary Tumor
1551	GI-Tract Cancer	7.27336	Primary Tumor
1552	GI-Tract Cancer	5.79901	Primary Tumor
1553	GI-Tract Cancer	5.13306	Primary Tumor
1554	GI-Tract Cancer	12.8937	Primary Tumor
1555	GI-Tract Cancer	7.17543	Solid Tissue Normal
1556	GI-Tract Cancer	5.2742	Primary Tumor
1557	GI-Tract Cancer	7.66892	Primary Tumor
1558	GI-Tract Cancer	5.51009	Primary Tumor
1559	GI-Tract Cancer	12.8752	Primary Tumor
1560	GI-Tract Cancer	5.31422	Primary Tumor
1561	GI-Tract Cancer	16.9437	Solid Tissue Normal
1562	GI-Tract Cancer	4.42315	Primary Tumor
1563	GI-Tract Cancer	7.08468	Primary Tumor
1564	GI-Tract Cancer	9.9489	Primary Tumor
1565	GI-Tract Cancer	4.74236	Primary Tumor
1566	GI-Tract Cancer	6.59481	Primary Tumor
1567	GI-Tract Cancer	6.87931	Primary Tumor
1568	GI-Tract Cancer	6.23614	Primary Tumor
1569	GI-Tract Cancer	12.4509	Primary Tumor
1570	GI-Tract Cancer	6.70163	Solid Tissue Normal
1571	GI-Tract Cancer	6.2659	Primary Tumor
1572	GI-Tract Cancer	6.50998	Primary Tumor
1573	GI-Tract Cancer	7.73175	Solid Tissue Normal
1574	GI-Tract Cancer	8.10937	Primary Tumor
1575	GI-Tract Cancer	17.0453	Primary Tumor
1576	GI-Tract Cancer	7.40321	Primary Tumor
1577	GI-Tract Cancer	4.77495	Primary Tumor
1578	GI-Tract Cancer	5.80978	Primary Tumor
1579	GI-Tract Cancer	5.87099	Solid Tissue Normal
1580	GI-Tract Cancer	7.52216	Primary Tumor
1581	GI-Tract Cancer	8.32312	Solid Tissue Normal
1582	GI-Tract Cancer	5.56385	Primary Tumor
1583	GI-Tract Cancer	5.02497	Primary Tumor
1584	GI-Tract Cancer	6.4651	Primary Tumor
1585	GI-Tract Cancer	16.1185	Primary Tumor
1586	GI-Tract Cancer	6.05092	Solid Tissue Normal
1587	GI-Tract Cancer	5.48335	Primary Tumor
1588	GI-Tract Cancer	8.45895	Solid Tissue Normal
1589	GI-Tract Cancer	8.17563	Primary Tumor
1590	GI-Tract Cancer	5.56103	Primary Tumor
1591	GI-Tract Cancer	11.2711	Primary Tumor
1592	GI-Tract Cancer	6.69095	Primary Tumor
1593	GI-Tract Cancer	3.2945	Primary Tumor
1594	GI-Tract Cancer	6.58475	Primary Tumor
1595	GI-Tract Cancer	12.4614	Primary Tumor
1596	GI-Tract Cancer	4.65027	Solid Tissue Normal
1597	GI-Tract Cancer	5.64224	Primary Tumor
1598	GI-Tract Cancer	7.77925	Primary Tumor
1599	GI-Tract Cancer	10.6783	Primary Tumor
1600	GI-Tract Cancer	4.53791	Primary Tumor
1601	GI-Tract Cancer	4.38315	Primary Tumor
1602	GI-Tract Cancer	6.60659	Primary Tumor
1603	GI-Tract Cancer	7.85059	Primary Tumor
1604	GI-Tract Cancer	6.97088	Primary Tumor
1605	GI-Tract Cancer	13.3395	Primary Tumor
1606	GI-Tract Cancer	7.03416	Primary Tumor
1607	GI-Tract Cancer	4.63216	Primary Tumor
1608	GI-Tract Cancer	4.53204	Primary Tumor
1609	GI-Tract Cancer	5.65011	Primary Tumor
1610	GI-Tract Cancer	6.71179	Primary Tumor
1611	GI-Tract Cancer	5.93016	Primary Tumor
1612	GI-Tract Cancer	5.59633	Primary Tumor
1613	GI-Tract Cancer	5.10737	Primary Tumor
1614	GI-Tract Cancer	6.4949	Primary Tumor
1615	GI-Tract Cancer	5.53079	Primary Tumor
1616	GI-Tract Cancer	5.68571	Primary Tumor
1617	GI-Tract Cancer	5.06746	Primary Tumor
1618	GI-Tract Cancer	7.71472	Primary Tumor
1619	GI-Tract Cancer	9.19872	Primary Tumor
1620	GI-Tract Cancer	9.79983	Primary Tumor
1621	GI-Tract Cancer	5.20587	Primary Tumor
1622	GI-Tract Cancer	13.6233	Solid Tissue Normal
1623	GI-Tract Cancer	5.17061	Primary Tumor
1624	GI-Tract Cancer	6.64318	Primary Tumor
1625	GI-Tract Cancer	6.11952	Primary Tumor
1626	GI-Tract Cancer	8.00473	Primary Tumor
1627	GI-Tract Cancer	5.95145	Primary Tumor
1628	GI-Tract Cancer	13.2846	Primary Tumor
1629	GI-Tract Cancer	5.8786	Primary Tumor
1630	GI-Tract Cancer	6.18526	Primary Tumor
1631	GI-Tract Cancer	6.44982	Solid Tissue Normal
1632	GI-Tract Cancer	6.59955	Solid Tissue Normal
1633	GI-Tract Cancer	6.02061	Primary Tumor
1634	GI-Tract Cancer	7.01963	Primary Tumor
1635	GI-Tract Cancer	6.92269	Primary Tumor
1636	GI-Tract Cancer	6.59852	Primary Tumor
1637	GI-Tract Cancer	6.9101	Primary Tumor
1638	GI-Tract Cancer	4.97778	Primary Tumor
1639	GI-Tract Cancer	5.76357	Primary Tumor
1640	GI-Tract Cancer	4.4363	Primary Tumor
1641	GI-Tract Cancer	10.3432	Primary Tumor
1642	GI-Tract Cancer	6.5464	Primary Tumor
1643	GI-Tract Cancer	6.726	Primary Tumor
1644	GI-Tract Cancer	6.02145	Primary Tumor
1645	GI-Tract Cancer	5.77593	Solid Tissue Normal
1646	GI-Tract Cancer	4.6333	Primary Tumor
1647	GI-Tract Cancer	9.63286	Primary Tumor
1648	GI-Tract Cancer	7.68024	Primary Tumor
1649	GI-Tract Cancer	14.2109	Primary Tumor
1650	GI-Tract Cancer	9.01988	Primary Tumor
1651	GI-Tract Cancer	7.6248	Primary Tumor
1652	GI-Tract Cancer	7.46734	Primary Tumor
1653	GI-Tract Cancer	7.44097	Primary Tumor
1654	GI-Tract Cancer	7.58125	Primary Tumor
1655	GI-Tract Cancer	4.94618	Primary Tumor
1656	GI-Tract Cancer	16.1685	Primary Tumor
1657	GI-Tract Cancer	10.7191	Primary Tumor
1658	GI-Tract Cancer	5.46579	Primary Tumor
1659	GI-Tract Cancer	6.20597	Primary Tumor
1660	GI-Tract Cancer	6.35177	Primary Tumor
1661	GI-Tract Cancer	6.62902	Solid Tissue Normal
1662	GI-Tract Cancer	8.89991	Primary Tumor
1663	GI-Tract Cancer	18.373	Primary Tumor
1664	GI-Tract Cancer	7.49044	Primary Tumor
1665	GI-Tract Cancer	12.3124	Primary Tumor
1666	GI-Tract Cancer	7.3909	Solid Tissue Normal
1667	GI-Tract Cancer	16.351	Primary Tumor
1668	GI-Tract Cancer	14.9712	Primary Tumor
1669	GI-Tract Cancer	8.10554	Primary Tumor
1670	GI-Tract Cancer	14.0416	Primary Tumor
1671	GI-Tract Cancer	7.232	Primary Tumor
1672	GI-Tract Cancer	6.23666	Primary Tumor
1673	GI-Tract Cancer	5.64769	Solid Tissue Normal
1674	GI-Tract Cancer	15.7108	Primary Tumor
1675	GI-Tract Cancer	5.44758	Solid Tissue Normal
1676	GI-Tract Cancer	6.34371	Primary Tumor
1677	GI-Tract Cancer	5.58079	Primary Tumor
1678	GI-Tract Cancer	6.40395	Primary Tumor
1679	GI-Tract Cancer	6.3476	Primary Tumor
1680	GI-Tract Cancer	7.08047	Primary Tumor
1681	GI-Tract Cancer	5.99616	Primary Tumor
1682	GI-Tract Cancer	6.50974	Primary Tumor
1683	GI-Tract Cancer	6.58854	Primary Tumor
1684	GI-Tract Cancer	12.9468	Primary Tumor
1685	GI-Tract Cancer	8.16917	Solid Tissue Normal
1686	GI-Tract Cancer	17.973	Primary Tumor
1687	GI-Tract Cancer	4.36624	Primary Tumor
1688	GI-Tract Cancer	5.73989	Primary Tumor
1689	GI-Tract Cancer	7.6906	Primary Tumor
1690	GI-Tract Cancer	5.73215	Primary Tumor
1691	GI-Tract Cancer	5.17483	Solid Tissue Normal
1692	GI-Tract Cancer	10.7096	Primary Tumor
1693	GI-Tract Cancer	4.6444	Primary Tumor
1694	GI-Tract Cancer	9.75579	Primary Tumor
1695	GI-Tract Cancer	7.35916	Primary Tumor
1696	GI-Tract Cancer	14.094	Solid Tissue Normal
1697	GI-Tract Cancer	13.4875	Primary Tumor
1698	GI-Tract Cancer	4.74999	Primary Tumor
1699	GI-Tract Cancer	13.0126	Primary Tumor
1700	GI-Tract Cancer	8.05133	Primary Tumor
1701	GI-Tract Cancer	13.7173	Primary Tumor
1702	GI-Tract Cancer	17.8001	Primary Tumor
1703	GI-Tract Cancer	13.8892	Primary Tumor
1704	GI-Tract Cancer	7.09169	Primary Tumor
1705	GI-Tract Cancer	6.73609	Primary Tumor
1706	GI-Tract Cancer	11.2423	Primary Tumor
1707	GI-Tract Cancer	7.80563	Primary Tumor
1708	GI-Tract Cancer	4.78322	Primary Tumor
1709	GI-Tract Cancer	5.39097	Primary Tumor
1710	GI-Tract Cancer	6.94772	Primary Tumor
1711	GI-Tract Cancer	7.37273	Primary Tumor
1712	GI-Tract Cancer	13.497	Solid Tissue Normal
1713	GI-Tract Cancer	5.53891	Primary Tumor
1714	GI-Tract Cancer	16.6143	Primary Tumor
1715	GI-Tract Cancer	12.2555	Primary Tumor
1716	GI-Tract Cancer	6.76094	Primary Tumor
1717	GI-Tract Cancer	4.8264	Primary Tumor
1718	GI-Tract Cancer	5.16183	Primary Tumor
1719	GI-Tract Cancer	4.68628	Primary Tumor
1720	GI-Tract Cancer	8.37192	Primary Tumor
1721	GI-Tract Cancer	13.5675	Solid Tissue Normal
1722	GI-Tract Cancer	6.50692	Primary Tumor
1723	GI-Tract Cancer	10.0025	Primary Tumor
1724	GI-Tract Cancer	6.40286	Primary Tumor
1725	GI-Tract Cancer	7.23389	Primary Tumor
1726	GI-Tract Cancer	4.49761	Primary Tumor
1727	GI-Tract Cancer	7.07027	Primary Tumor
1728	GI-Tract Cancer	7.05702	Primary Tumor
1729	GI-Tract Cancer	7.90949	Primary Tumor
1730	GI-Tract Cancer	10.7029	Primary Tumor
1731	GI-Tract Cancer	11.3132	Primary Tumor
1732	GI-Tract Cancer	5.28506	Primary Tumor
1733	GI-Tract Cancer	4.62043	Primary Tumor
1734	GI-Tract Cancer	7.82507	Primary Tumor
1735	GI-Tract Cancer	7.8899	Primary Tumor
1736	GI-Tract Cancer	6.78749	Primary Tumor
1737	GI-Tract Cancer	5.99072	Primary Tumor
1738	GI-Tract Cancer	9.37745	Solid Tissue Normal
1739	GI-Tract Cancer	9.02128	Primary Tumor
1740	GI-Tract Cancer	15.8462	Primary Tumor
1741	GI-Tract Cancer	9.55496	Primary Tumor
1742	GI-Tract Cancer	14.0568	Primary Tumor
1743	GI-Tract Cancer	9.58919	Primary Tumor
1744	GI-Tract Cancer	5.82872	Primary Tumor
1745	GI-Tract Cancer	10.4326	Primary Tumor
1746	GI-Tract Cancer	7.44642	Primary Tumor
1747	GI-Tract Cancer	13.4693	Primary Tumor
1748	GI-Tract Cancer	6.05003	Solid Tissue Normal
1749	GI-Tract Cancer	3.31657	Primary Tumor
1750	GI-Tract Cancer	14.2855	Primary Tumor
1751	GI-Tract Cancer	11.4128	Solid Tissue Normal
1752	GI-Tract Cancer	3.93274	Primary Tumor
1753	GI-Tract Cancer	10.5611	Primary Tumor
1754	GI-Tract Cancer	13.9572	Solid Tissue Normal
1755	GI-Tract Cancer	8.29715	Primary Tumor
1756	GI-Tract Cancer	7.34484	Primary Tumor
1757	GI-Tract Cancer	9.4827	Primary Tumor
1758	GI-Tract Cancer	5.38304	Primary Tumor
1759	GI-Tract Cancer	10.9835	Primary Tumor
1760	GI-Tract Cancer	6.54186	Primary Tumor
1761	GI-Tract Cancer	7.01469	Primary Tumor
1762	GI-Tract Cancer	6.2201	Primary Tumor
1763	GI-Tract Cancer	13.7393	Primary Tumor
1764	GI-Tract Cancer	5.74906	Primary Tumor
1765	GI-Tract Cancer	5.42546	Primary Tumor
1766	GI-Tract Cancer	7.26337	Primary Tumor
1767	GI-Tract Cancer	4.42075	Solid Tissue Normal
1768	GI-Tract Cancer	12.3111	Solid Tissue Normal
1769	GI-Tract Cancer	6.73329	Primary Tumor
1770	GI-Tract Cancer	4.10336	Primary Tumor
1771	GI-Tract Cancer	6.01038	Primary Tumor
1772	GI-Tract Cancer	8.69993	Primary Tumor
1773	GI-Tract Cancer	7.48184	Primary Tumor
1774	GI-Tract Cancer	13.7547	Primary Tumor
1775	GI-Tract Cancer	13.5537	Primary Tumor
1776	GI-Tract Cancer	8.64024	Primary Tumor
1777	GI-Tract Cancer	9.04226	Solid Tissue Normal
1778	GI-Tract Cancer	10.7988	Primary Tumor
1779	GI-Tract Cancer	18.4167	Primary Tumor
1780	GI-Tract Cancer	8.79493	Primary Tumor
1781	GI-Tract Cancer	9.15406	Primary Tumor
1782	GI-Tract Cancer	5.9708	Primary Tumor
1783	GI-Tract Cancer	12.4141	Primary Tumor
1784	GI-Tract Cancer	8.30856	Primary Tumor
1785	GI-Tract Cancer	5.01143	Primary Tumor
1786	GI-Tract Cancer	6.72938	Primary Tumor
1787	GI-Tract Cancer	6.75362	Primary Tumor
1788	GI-Tract Cancer	4.92295	Primary Tumor
1789	GI-Tract Cancer	5.54396	Primary Tumor
1790	GI-Tract Cancer	5.06675	Primary Tumor
1791	GI-Tract Cancer	5.46873	Solid Tissue Normal
1792	GI-Tract Cancer	6.07304	Primary Tumor
1793	GI-Tract Cancer	6.67512	Primary Tumor
1794	GI-Tract Cancer	5.52755	Primary Tumor
1795	GI-Tract Cancer	13.5588	Primary Tumor
1796	GI-Tract Cancer	5.84699	Primary Tumor
1797	GI-Tract Cancer	13.4939	Primary Tumor
1798	GI-Tract Cancer	7.90042	Primary Tumor
1799	GI-Tract Cancer	7.84668	Primary Tumor
1800	GI-Tract Cancer	4.90208	Primary Tumor
1801	GI-Tract Cancer	6.31153	Primary Tumor
1802	GI-Tract Cancer	5.79708	Primary Tumor
1803	GI-Tract Cancer	5.57017	Primary Tumor
1804	GI-Tract Cancer	13.1075	Primary Tumor
1805	GI-Tract Cancer	4.11569	Primary Tumor
1806	GI-Tract Cancer	8.45874	Primary Tumor
1807	GI-Tract Cancer	5.55249	Solid Tissue Normal
1808	GI-Tract Cancer	6.68585	Primary Tumor
1809	GI-Tract Cancer	6.63704	Solid Tissue Normal
1810	GI-Tract Cancer	3.60106	Primary Tumor
1811	GI-Tract Cancer	6.18929	Primary Tumor
1812	GI-Tract Cancer	3.92809	Primary Tumor
1813	GI-Tract Cancer	8.02677	Primary Tumor
1814	GI-Tract Cancer	7.37177	Primary Tumor
1815	GI-Tract Cancer	10.6833	Primary Tumor
1816	GI-Tract Cancer	13.5132	Primary Tumor
1817	GI-Tract Cancer	10.1193	Primary Tumor
1818	GI-Tract Cancer	10.8875	Primary Tumor
1819	GI-Tract Cancer	6.24261	Primary Tumor
1820	GI-Tract Cancer	7.28309	Primary Tumor
1821	GI-Tract Cancer	6.6735	Primary Tumor
1822	GI-Tract Cancer	7.78115	Primary Tumor
1823	GI-Tract Cancer	10.1677	Solid Tissue Normal
1824	GI-Tract Cancer	10.9571	Primary Tumor
1825	GI-Tract Cancer	10.1981	Primary Tumor
1826	GI-Tract Cancer	11.0134	Primary Tumor
1827	GI-Tract Cancer	5.82597	Primary Tumor
1828	GI-Tract Cancer	9.19444	Primary Tumor
1829	GI-Tract Cancer	11.048	Primary Tumor
1830	GI-Tract Cancer	8.94592	Primary Tumor
1831	GI-Tract Cancer	4.40183	Primary Tumor
1832	GI-Tract Cancer	7.15563	Solid Tissue Normal
1833	GI-Tract Cancer	4.98966	Primary Tumor
1834	GI-Tract Cancer	10.8771	Primary Tumor
1835	GI-Tract Cancer	6.36952	Primary Tumor
1836	GI-Tract Cancer	6.25416	Primary Tumor
1837	GI-Tract Cancer	12.5315	Primary Tumor
1838	GI-Tract Cancer	8.03732	Primary Tumor
1839	GI-Tract Cancer	8.32142	Primary Tumor
1840	GI-Tract Cancer	4.30722	Primary Tumor
1841	GI-Tract Cancer	16.4268	Primary Tumor
1842	GI-Tract Cancer	9.37672	Primary Tumor
1843	GI-Tract Cancer	10.3925	Primary Tumor
1844	GI-Tract Cancer	7.21309	Primary Tumor
1845	GI-Tract Cancer	7.24199	Solid Tissue Normal
1846	GI-Tract Cancer	14.1185	Primary Tumor
1847	GI-Tract Cancer	13.2506	Primary Tumor
1848	GI-Tract Cancer	16.6848	Primary Tumor
1849	GI-Tract Cancer	10.0213	Primary Tumor
1850	GI-Tract Cancer	9.2968	Primary Tumor
1851	GI-Tract Cancer	5.23887	Primary Tumor
1852	GI-Tract Cancer	7.66508	Primary Tumor
1853	GI-Tract Cancer	15.902	Primary Tumor
1854	GI-Tract Cancer	14.5871	Primary Tumor
1855	GI-Tract Cancer	6.86128	Primary Tumor
1856	GI-Tract Cancer	7.11807	Primary Tumor
1857	GI-Tract Cancer	10.1405	Primary Tumor
1858	GI-Tract Cancer	13.6203	Primary Tumor
1859	GI-Tract Cancer	3.85673	Primary Tumor
1860	GI-Tract Cancer	5.25935	Primary Tumor
1861	GI-Tract Cancer	7.5584	Primary Tumor
1862	GI-Tract Cancer	12.239	Primary Tumor
1863	GI-Tract Cancer	5.16329	Primary Tumor
1864	GI-Tract Cancer	8.48122	Primary Tumor
1865	GI-Tract Cancer	5.8494	Primary Tumor
1866	GI-Tract Cancer	7.48083	Primary Tumor
1867	GI-Tract Cancer	7.88586	Primary Tumor
1868	GI-Tract Cancer	11.6858	Primary Tumor
1869	GI-Tract Cancer	6.44593	Primary Tumor
1870	GI-Tract Cancer	4.3078	Primary Tumor
1871	GI-Tract Cancer	6.38224	Primary Tumor
1872	GI-Tract Cancer	13.3856	Primary Tumor
1873	GI-Tract Cancer	11.2832	Primary Tumor
1874	GI-Tract Cancer	10.8447	Primary Tumor
1875	GI-Tract Cancer	9.49243	Primary Tumor
1876	GI-Tract Cancer	4.25902	Primary Tumor
1877	GI-Tract Cancer	4.78747	Primary Tumor
1878	GI-Tract Cancer	6.94521	Primary Tumor
1879	GI-Tract Cancer	7.14974	Primary Tumor
1880	GI-Tract Cancer	5.38837	Primary Tumor
1881	GI-Tract Cancer	8.40468	Primary Tumor
1882	GI-Tract Cancer	13.2791	Primary Tumor
1883	GI-Tract Cancer	8.56138	Primary Tumor
1884	GI-Tract Cancer	8.77372	Primary Tumor
1885	GI-Tract Cancer	19.0229	Primary Tumor
1886	GI-Tract Cancer	5.85502	Primary Tumor
1887	GI-Tract Cancer	5.78899	Primary Tumor
1888	GI-Tract Cancer	3.8458	Primary Tumor
1889	GI-Tract Cancer	4.98251	Primary Tumor
1890	GI-Tract Cancer	7.20342	Primary Tumor
1891	GI-Tract Cancer	6.46613	Primary Tumor
1892	GI-Tract Cancer	7.57551	Primary Tumor
1893	GI-Tract Cancer	14.7613	Primary Tumor
1894	GI-Tract Cancer	4.91729	Primary Tumor
1895	GI-Tract Cancer	17.5285	Primary Tumor
1896	GI-Tract Cancer	7.17371	Primary Tumor
1897	GI-Tract Cancer	7.41955	Primary Tumor
1898	GI-Tract Cancer	15.2786	Primary Tumor
1899	GI-Tract Cancer	6.21452	Primary Tumor
1900	GI-Tract Cancer	5.59273	Primary Tumor
1901	GI-Tract Cancer	9.05748	Solid Tissue Normal
1902	GI-Tract Cancer	11.2765	Primary Tumor
1903	GI-Tract Cancer	8.70767	Solid Tissue Normal
1904	GI-Tract Cancer	9.21461	Primary Tumor
1905	GI-Tract Cancer	7.62624	Primary Tumor
1906	GI-Tract Cancer	5.37128	Primary Tumor
1907	GI-Tract Cancer	3.9585	Primary Tumor
1908	GI-Tract Cancer	5.22104	Primary Tumor
1909	GI-Tract Cancer	7.37002	Solid Tissue Normal
1910	GI-Tract Cancer	8.39228	Primary Tumor
1911	GI-Tract Cancer	10.2867	Primary Tumor
1912	GI-Tract Cancer	4.73547	Solid Tissue Normal
1913	GI-Tract Cancer	19.2316	Primary Tumor
1914	GI-Tract Cancer	7.49246	Primary Tumor
1915	GI-Tract Cancer	5.63679	Primary Tumor
1916	GI-Tract Cancer	8.07341	Primary Tumor
1917	GI-Tract Cancer	4.18662	Primary Tumor
1918	GI-Tract Cancer	14.952	Primary Tumor
1919	GI-Tract Cancer	7.72735	Primary Tumor
1920	GI-Tract Cancer	6.22499	Primary Tumor
1921	GI-Tract Cancer	6.85365	Primary Tumor
1922	GI-Tract Cancer	6.13339	Primary Tumor
1923	GI-Tract Cancer	8.93793	Primary Tumor
1924	GI-Tract Cancer	5.89887	Primary Tumor
1925	GI-Tract Cancer	6.98647	Primary Tumor
1926	GI-Tract Cancer	6.44611	Primary Tumor
1927	GI-Tract Cancer	6.05241	Primary Tumor
1928	GI-Tract Cancer	4.05092	Primary Tumor
1929	GI-Tract Cancer	10.1026	Primary Tumor
1930	GI-Tract Cancer	10.0732	Primary Tumor
1931	GI-Tract Cancer	6.7001	Primary Tumor
1932	GI-Tract Cancer	6.05848	Primary Tumor
1933	GI-Tract Cancer	4.25561	Primary Tumor
1934	GI-Tract Cancer	4.38799	Primary Tumor
1935	GI-Tract Cancer	6.32175	Primary Tumor
1936	GI-Tract Cancer	7.20645	Primary Tumor
1937	GI-Tract Cancer	14.741	Primary Tumor
1938	GI-Tract Cancer	6.4238	Primary Tumor
1939	GI-Tract Cancer	15.9672	Primary Tumor
1940	GI-Tract Cancer	11.7275	Primary Tumor
1941	GI-Tract Cancer	5.67252	Primary Tumor
1942	GI-Tract Cancer	7.76388	Primary Tumor
1943	GI-Tract Cancer	10.7338	Primary Tumor
1944	GI-Tract Cancer	5.03421	Solid Tissue Normal
1945	GI-Tract Cancer	6.49223	Primary Tumor
1946	GI-Tract Cancer	7.73852	Primary Tumor
1947	GI-Tract Cancer	8.53687	Solid Tissue Normal
1948	GI-Tract Cancer	8.33124	Primary Tumor
1949	GI-Tract Cancer	6.91126	Primary Tumor
1950	GI-Tract Cancer	11.5319	Primary Tumor
1951	GI-Tract Cancer	12.3692	Primary Tumor
1952	GI-Tract Cancer	10.6466	Primary Tumor
1953	GI-Tract Cancer	5.46861	Primary Tumor
1954	GI-Tract Cancer	5.1986	Primary Tumor
1955	GI-Tract Cancer	4.70292	Solid Tissue Normal
1956	GI-Tract Cancer	5.79087	Primary Tumor
1957	GI-Tract Cancer	5.50679	Primary Tumor
1958	GI-Tract Cancer	6.44243	Primary Tumor
1959	GI-Tract Cancer	6.07559	Primary Tumor
1960	GI-Tract Cancer	4.63635	Primary Tumor
1961	GI-Tract Cancer	9.09526	Primary Tumor
1962	GI-Tract Cancer	14.6916	Primary Tumor
1963	GI-Tract Cancer	5.43215	Primary Tumor
1964	GI-Tract Cancer	5.98691	Primary Tumor
1965	GI-Tract Cancer	8.01889	Primary Tumor
1966	GI-Tract Cancer	7.10273	Primary Tumor
1967	GI-Tract Cancer	6.40345	Primary Tumor
1968	GI-Tract Cancer	5.59825	Primary Tumor
1969	GI-Tract Cancer	11.1282	Primary Tumor
1970	GI-Tract Cancer	6.58401	Solid Tissue Normal
1971	GI-Tract Cancer	5.06974	Primary Tumor
1972	GI-Tract Cancer	5.71661	Primary Tumor
1973	GI-Tract Cancer	5.40895	Solid Tissue Normal
1974	GI-Tract Cancer	11.1197	Primary Tumor
1975	GI-Tract Cancer	7.0611	Primary Tumor
1976	GI-Tract Cancer	5.23369	Primary Tumor
1977	GI-Tract Cancer	7.89591	Primary Tumor
1978	GI-Tract Cancer	6.69755	Primary Tumor
1979	GI-Tract Cancer	13.8901	Primary Tumor
1980	GI-Tract Cancer	6.81038	Primary Tumor
1981	GI-Tract Cancer	10.2814	Solid Tissue Normal
1982	GI-Tract Cancer	5.30406	Primary Tumor
1983	GI-Tract Cancer	6.43359	Primary Tumor
1984	GI-Tract Cancer	9.22308	Primary Tumor
1985	GI-Tract Cancer	15.0576	Primary Tumor
1986	GI-Tract Cancer	4.70671	Primary Tumor
1987	GI-Tract Cancer	5.26149	Primary Tumor
1988	GI-Tract Cancer	9.08154	Primary Tumor
1989	GI-Tract Cancer	12.9833	Primary Tumor
1990	GI-Tract Cancer	8.24969	Primary Tumor
1991	GI-Tract Cancer	11.1866	Primary Tumor
1992	GI-Tract Cancer	8.76682	Primary Tumor
1993	GI-Tract Cancer	15.8178	Primary Tumor
1994	GI-Tract Cancer	3.85168	Primary Tumor
1995	GI-Tract Cancer	7.33882	Primary Tumor
1996	GI-Tract Cancer	6.16422	Primary Tumor
1997	GI-Tract Cancer	8.95746	Primary Tumor
1998	GI-Tract Cancer	5.85303	Primary Tumor
1999	GI-Tract Cancer	4.40794	Primary Tumor
[truncated: 13,090 more rows]

## Sheet: Fig 3d
	hpvInteract	HPV	sample_type
1	TCGA-CESC Positive	10.0143	Primary Tumor
2	TCGA-CESC Positive	11.1591	Primary Tumor
3	TCGA-CESC Positive	13.2779	Primary Tumor
4	TCGA-CESC Negative	-0.641254	Blood Derived Normal
5	TCGA-CESC Positive	7.24161	Primary Tumor
6	TCGA-CESC Positive	9.22725	Primary Tumor
7	TCGA-CESC Positive	4.38231	Primary Tumor
8	TCGA-CESC Positive	12.0748	Primary Tumor
9	TCGA-CESC Positive	6.13665	Primary Tumor
10	TCGA-CESC Positive	7.87046	Primary Tumor
11	TCGA-CESC Positive	-6.0356	Blood Derived Normal
12	TCGA-CESC Positive	8.76303	Primary Tumor
13	TCGA-CESC Positive	7.07218	Primary Tumor
14	TCGA-CESC Positive	14.7905	Primary Tumor
15	TCGA-CESC Positive	4.34429	Primary Tumor
16	TCGA-CESC Positive	5.62187	Primary Tumor
17	TCGA-CESC Positive	3.79529	Primary Tumor
18	TCGA-CESC Positive	7.93052	Primary Tumor
19	TCGA-CESC Positive	2.73628	Blood Derived Normal
20	TCGA-CESC Positive	7.48002	Primary Tumor
21	TCGA-CESC Positive	8.07747	Primary Tumor
22	TCGA-CESC Positive	12.7531	Primary Tumor
23	TCGA-CESC Positive	13.0764	Primary Tumor
24	TCGA-CESC Positive	-2.81665	Primary Tumor
25	TCGA-CESC Positive	9.93076	Primary Tumor
26	TCGA-CESC Positive	2.18954	Primary Tumor
27	TCGA-CESC Positive	9.62545	Primary Tumor
28	TCGA-CESC Positive	6.7728	Primary Tumor
29	TCGA-CESC Positive	4.13105	Primary Tumor
30	TCGA-CESC Positive	4.6314	Primary Tumor
31	TCGA-CESC Positive	2.78881	Primary Tumor
32	TCGA-CESC Positive	16.5156	Primary Tumor
33	TCGA-CESC Positive	1.75216	Primary Tumor
34	TCGA-CESC Positive	2.85162	Blood Derived Normal
35	TCGA-CESC Positive	12.9271	Primary Tumor
36	TCGA-CESC Positive	0.313741	Primary Tumor
37	TCGA-CESC Positive	-6.42927	Primary Tumor
38	TCGA-CESC Positive	5.94769	Primary Tumor
39	TCGA-CESC Positive	-5.18409	Blood Derived Normal
40	TCGA-CESC Positive	14.6292	Primary Tumor
41	TCGA-CESC Negative	9.68258	Primary Tumor
42	TCGA-CESC Positive	2.49988	Blood Derived Normal
43	TCGA-CESC Negative	0.53878	Primary Tumor
44	TCGA-CESC Positive	0.331235	Primary Tumor
45	TCGA-CESC Positive	9.86029	Primary Tumor
46	TCGA-CESC Negative	-0.491587	Blood Derived Normal
47	TCGA-CESC Positive	-0.881578	Blood Derived Normal
48	TCGA-CESC Positive	8.86882	Primary Tumor
49	TCGA-CESC Positive	14.101	Primary Tumor
50	TCGA-CESC Positive	13.0312	Primary Tumor
51	TCGA-CESC Positive	14.3072	Primary Tumor
52	TCGA-CESC Positive	13.8082	Primary Tumor
53	TCGA-CESC Positive	-1.19141	Blood Derived Normal
54	TCGA-CESC Positive	9.44246	Primary Tumor
55	TCGA-CESC Positive	8.0924	Primary Tumor
56	TCGA-CESC Positive	-3.12153	Blood Derived Normal
57	TCGA-CESC Positive	6.93913	Primary Tumor
58	TCGA-CESC Positive	5.7391	Primary Tumor
59	TCGA-CESC Positive	-6.58357	Blood Derived Normal
60	TCGA-CESC Positive	2.57201	Primary Tumor
61	TCGA-CESC Positive	1.52959	Blood Derived Normal
62	TCGA-CESC Positive	9.92005	Primary Tumor
63	TCGA-CESC Positive	10.6035	Primary Tumor
64	TCGA-CESC Positive	14.2372	Primary Tumor
65	TCGA-CESC Positive	1.73519	Blood Derived Normal
66	TCGA-CESC Positive	16.5541	Primary Tumor
67	TCGA-CESC Positive	17.3197	Primary Tumor
68	TCGA-CESC Positive	9.31381	Primary Tumor
69	TCGA-CESC Positive	-6.24818	Primary Tumor
70	TCGA-CESC Positive	-4.01363	Primary Tumor
71	TCGA-CESC Positive	7.37578	Primary Tumor
72	TCGA-CESC Positive	6.20364	Primary Tumor
73	TCGA-CESC Positive	0.465843	Blood Derived Normal
74	TCGA-CESC Positive	9.16044	Primary Tumor
75	TCGA-CESC Negative	-3.92892	Primary Tumor
76	TCGA-CESC Positive	-3.68291	Blood Derived Normal
77	TCGA-CESC Positive	0.551799	Primary Tumor
78	TCGA-CESC Positive	10.0868	Primary Tumor
79	TCGA-CESC Positive	0.0180621	Blood Derived Normal
80	TCGA-CESC Positive	13.091	Primary Tumor
81	TCGA-CESC Positive	2.77952	Primary Tumor
82	TCGA-CESC Positive	10.284	Primary Tumor
83	TCGA-CESC Positive	16.3634	Primary Tumor
84	TCGA-CESC Positive	0.109377	Blood Derived Normal
85	TCGA-CESC Positive	11.9149	Primary Tumor
86	TCGA-CESC Negative	0.63868	Primary Tumor
87	TCGA-CESC Positive	-1.98775	Primary Tumor
88	TCGA-CESC Positive	7.53767	Primary Tumor
89	TCGA-CESC Positive	9.30295	Primary Tumor
90	TCGA-CESC Positive	8.54797	Primary Tumor
91	TCGA-CESC Positive	-6.60904	Blood Derived Normal
92	TCGA-CESC Positive	-3.79919	Blood Derived Normal
93	TCGA-CESC Positive	9.75173	Primary Tumor
94	TCGA-CESC Positive	3.27947	Primary Tumor
95	TCGA-CESC Positive	14.0328	Primary Tumor
96	TCGA-CESC Positive	-0.390037	Blood Derived Normal
97	TCGA-CESC Positive	5.96322	Primary Tumor
98	TCGA-CESC Positive	14.5943	Primary Tumor
99	TCGA-CESC Positive	13.6609	Primary Tumor
100	TCGA-CESC Positive	-6.57234	Blood Derived Normal
101	TCGA-CESC Positive	0.608648	Primary Tumor
102	TCGA-CESC Positive	-2.42154	Primary Tumor
103	TCGA-CESC Positive	0.835657	Primary Tumor
104	TCGA-CESC Positive	-1.13663	Blood Derived Normal
105	TCGA-CESC Positive	10.7972	Primary Tumor
106	TCGA-CESC Positive	12.911	Primary Tumor
107	TCGA-CESC Positive	3.827	Primary Tumor
108	TCGA-CESC Positive	5.88559	Primary Tumor
109	TCGA-CESC Negative	1.41444	Primary Tumor
110	TCGA-CESC Positive	14.534	Primary Tumor
111	TCGA-CESC Positive	-6.84932	Blood Derived Normal
112	TCGA-CESC Positive	12.9533	Primary Tumor
113	TCGA-CESC Positive	10.4912	Primary Tumor
114	TCGA-CESC Positive	7.14807	Primary Tumor
115	TCGA-CESC Positive	10.8454	Primary Tumor
116	TCGA-CESC Positive	15.1232	Primary Tumor
117	TCGA-CESC Positive	8.98577	Primary Tumor
118	TCGA-CESC Positive	7.80894	Primary Tumor
119	TCGA-CESC Positive	2.99578	Primary Tumor
120	TCGA-CESC Positive	4.01862	Primary Tumor
121	TCGA-CESC Positive	13.6012	Primary Tumor
122	TCGA-CESC Positive	4.92269	Primary Tumor
123	TCGA-CESC Positive	8.28861	Primary Tumor
124	TCGA-CESC Positive	5.49491	Primary Tumor
125	TCGA-CESC Positive	4.70401	Primary Tumor
126	TCGA-CESC Positive	5.63553	Primary Tumor
127	TCGA-CESC Positive	-6.19335	Blood Derived Normal
128	TCGA-CESC Positive	6.28761	Primary Tumor
129	TCGA-CESC Positive	-3.10408	Blood Derived Normal
130	TCGA-CESC Negative	-0.565312	Primary Tumor
131	TCGA-CESC Positive	13.8209	Primary Tumor
132	TCGA-CESC Positive	7.63587	Primary Tumor
133	TCGA-CESC Positive	6.33302	Primary Tumor
134	TCGA-CESC Positive	-1.0877	Primary Tumor
135	TCGA-CESC Positive	7.78839	Primary Tumor
136	TCGA-CESC Negative	9.79956	Primary Tumor
137	TCGA-CESC Positive	0.109346	Primary Tumor
138	TCGA-CESC Positive	14.4962	Primary Tumor
139	TCGA-CESC Positive	1.01604	Primary Tumor
140	TCGA-CESC Positive	-0.188612	Blood Derived Normal
141	TCGA-CESC Positive	1.47418	Blood Derived Normal
142	TCGA-CESC Positive	14.0197	Primary Tumor
143	TCGA-CESC Positive	13.1845	Primary Tumor
144	TCGA-CESC Positive	9.69413	Primary Tumor
145	TCGA-CESC Positive	9.75695	Primary Tumor
146	TCGA-CESC Positive	2.04391	Primary Tumor
147	TCGA-CESC Positive	1.74209	Blood Derived Normal
148	TCGA-CESC Positive	9.31526	Primary Tumor
149	TCGA-CESC Positive	11.3113	Primary Tumor
150	TCGA-CESC Positive	1.39325	Primary Tumor
151	TCGA-CESC Positive	15.8005	Primary Tumor
152	TCGA-CESC Positive	9.20408	Primary Tumor
153	TCGA-CESC Positive	10.6089	Primary Tumor
154	TCGA-CESC Positive	9.82162	Primary Tumor
155	TCGA-CESC Positive	11.0543	Primary Tumor
156	TCGA-CESC Positive	-2.86957	Primary Tumor
157	TCGA-CESC Positive	14.5233	Primary Tumor
158	TCGA-CESC Positive	7.46853	Primary Tumor
159	TCGA-CESC Positive	7.42348	Primary Tumor
160	TCGA-CESC Positive	14.8916	Primary Tumor
161	TCGA-CESC Negative	-0.902605	Primary Tumor
162	TCGA-CESC Positive	13.7822	Primary Tumor
163	TCGA-CESC Positive	8.83787	Primary Tumor
164	TCGA-CESC Positive	14.4495	Primary Tumor
165	TCGA-CESC Positive	14.5652	Primary Tumor
166	TCGA-CESC Positive	1.68311	Primary Tumor
167	TCGA-CESC Positive	10.0757	Primary Tumor
168	TCGA-CESC Positive	-0.282746	Blood Derived Normal
169	TCGA-CESC Positive	2.20117	Primary Tumor
170	TCGA-CESC Positive	6.738	Primary Tumor
171	TCGA-CESC Positive	3.85814	Primary Tumor
172	TCGA-CESC Positive	12.4602	Primary Tumor
173	TCGA-CESC Positive	-1.11888	Primary Tumor
174	TCGA-CESC Positive	2.10425	Primary Tumor
175	TCGA-CESC Positive	7.00536	Primary Tumor
176	TCGA-CESC Positive	2.32125	Blood Derived Normal
177	TCGA-CESC Positive	9.68138	Primary Tumor
178	TCGA-CESC Negative	0.640709	Primary Tumor
179	TCGA-CESC Positive	9.62445	Primary Tumor
180	TCGA-CESC Positive	1.58956	Blood Derived Normal
181	TCGA-CESC Positive	9.86619	Primary Tumor
182	TCGA-CESC Positive	7.869	Primary Tumor
183	TCGA-CESC Positive	6.16886	Primary Tumor
184	TCGA-CESC Positive	0.719433	Blood Derived Normal
185	TCGA-CESC Positive	13.7438	Primary Tumor
186	TCGA-CESC Positive	3.55703	Primary Tumor
187	TCGA-CESC Positive	10.3904	Primary Tumor
188	TCGA-CESC Positive	13.2824	Primary Tumor
189	TCGA-CESC Positive	3.21399	Primary Tumor
190	TCGA-CESC Positive	14.5994	Primary Tumor
191	TCGA-CESC Negative	4.54567	Primary Tumor
192	TCGA-CESC Positive	-5.15086	Blood Derived Normal
193	TCGA-CESC Positive	0.449486	Primary Tumor
194	TCGA-CESC Positive	10.1443	Primary Tumor
195	TCGA-CESC Positive	6.50276	Primary Tumor
196	TCGA-CESC Positive	-1.14301	Blood Derived Normal
197	TCGA-CESC Positive	-6.39193	Blood Derived Normal
198	TCGA-CESC Positive	13.2583	Primary Tumor
199	TCGA-CESC Positive	11.3517	Primary Tumor
200	TCGA-CESC Positive	-6.56606	Blood Derived Normal
201	TCGA-CESC Positive	9.17845	Primary Tumor
202	TCGA-CESC Positive	14.2889	Primary Tumor
203	TCGA-CESC Positive	12.1802	Primary Tumor
204	TCGA-CESC Positive	2.75119	Primary Tumor
205	TCGA-CESC Positive	12.9088	Primary Tumor
206	TCGA-CESC Positive	8.98099	Primary Tumor
207	TCGA-CESC Positive	8.54936	Primary Tumor
208	TCGA-CESC Positive	10.2617	Primary Tumor
209	TCGA-CESC Positive	13.7377	Primary Tumor
210	TCGA-CESC Positive	0.640522	Blood Derived Normal
211	TCGA-CESC Positive	10.6034	Primary Tumor
212	TCGA-CESC Positive	-0.552733	Primary Tumor
213	TCGA-CESC Positive	11.8665	Primary Tumor
214	TCGA-CESC Negative	4.22105	Primary Tumor
215	TCGA-CESC Positive	15.4128	Primary Tumor
216	TCGA-CESC Positive	8.26353	Primary Tumor
217	TCGA-CESC Positive	14.5996	Primary Tumor
218	TCGA-CESC Positive	13.2751	Primary Tumor
219	TCGA-CESC Positive	0.19529	Blood Derived Normal
220	TCGA-CESC Positive	10.1002	Primary Tumor
221	TCGA-CESC Positive	0.382698	Blood Derived Normal
222	TCGA-CESC Positive	11.3488	Primary Tumor
223	TCGA-CESC Positive	1.61923	Primary Tumor
224	TCGA-CESC Positive	7.53396	Primary Tumor
225	TCGA-CESC Positive	5.98691	Primary Tumor
226	TCGA-CESC Positive	7.7898	Primary Tumor
227	TCGA-CESC Negative	-3.29265	Primary Tumor
228	TCGA-CESC Positive	11.9521	Primary Tumor
229	TCGA-CESC Positive	14.3632	Primary Tumor
230	TCGA-CESC Positive	15.7834	Primary Tumor
231	TCGA-CESC Positive	13.1908	Primary Tumor
232	TCGA-CESC Positive	6.89209	Primary Tumor
233	TCGA-CESC Positive	14.4778	Primary Tumor
234	TCGA-CESC Positive	12.2327	Primary Tumor
235	TCGA-CESC Positive	7.07116	Primary Tumor
236	TCGA-CESC Negative	0.721579	Primary Tumor
237	TCGA-CESC Positive	13.2463	Primary Tumor
238	TCGA-CESC Positive	13.1323	Primary Tumor
239	TCGA-CESC Positive	7.84818	Primary Tumor
240	TCGA-CESC Positive	10.994	Primary Tumor
241	TCGA-CESC Positive	14.076	Primary Tumor
242	TCGA-CESC Negative	3.88543	Primary Tumor
243	TCGA-CESC Positive	0.87103	Blood Derived Normal
244	TCGA-CESC Positive	3.90039	Primary Tumor
245	TCGA-CESC Positive	11.3923	Primary Tumor
246	TCGA-CESC Positive	11.871	Primary Tumor
247	TCGA-CESC Positive	5.33177	Primary Tumor
248	TCGA-CESC Positive	12.588	Primary Tumor
249	TCGA-CESC Positive	3.59868	Primary Tumor
250	TCGA-CESC Negative	2.34704	Primary Tumor
251	TCGA-CESC Positive	8.87937	Primary Tumor
252	TCGA-CESC Positive	13.5162	Primary Tumor
253	TCGA-CESC Positive	8.2497	Primary Tumor
254	TCGA-CESC Positive	8.39227	Primary Tumor
255	TCGA-CESC Positive	7.64713	Primary Tumor
256	TCGA-CESC Positive	11.6299	Primary Tumor
257	TCGA-CESC Positive	3.06585	Primary Tumor
258	TCGA-CESC Positive	4.97244	Primary Tumor
259	TCGA-CESC Positive	0.856333	Primary Tumor
260	TCGA-CESC Positive	8.80236	Primary Tumor
261	TCGA-CESC Positive	14.4044	Primary Tumor
262	TCGA-CESC Negative	-0.587927	Primary Tumor
263	TCGA-CESC Positive	6.58767	Primary Tumor
264	TCGA-CESC Positive	14.5374	Primary Tumor
265	TCGA-CESC Positive	2.50779	Primary Tumor
266	TCGA-CESC Positive	3.74068	Primary Tumor
267	TCGA-CESC Positive	-2.924	Primary Tumor
268	TCGA-CESC Positive	3.9511	Blood Derived Normal
269	TCGA-CESC Positive	14.6293	Primary Tumor
270	TCGA-CESC Positive	-3.11941	Primary Tumor
271	TCGA-CESC Positive	8.60742	Primary Tumor
272	TCGA-CESC Positive	3.06053	Primary Tumor
273	TCGA-CESC Positive	-1.43004	Primary Tumor
274	TCGA-CESC Positive	15.706	Primary Tumor
275	TCGA-CESC Positive	12.9287	Primary Tumor
276	TCGA-CESC Positive	5.17226	Primary Tumor
277	TCGA-CESC Positive	3.21022	Primary Tumor
278	TCGA-CESC Positive	2.57783	Primary Tumor
279	TCGA-CESC Positive	5.6928	Primary Tumor
280	TCGA-CESC Positive	-0.535904	Blood Derived Normal
281	TCGA-CESC Positive	6.59054	Primary Tumor
282	TCGA-CESC Positive	13.4082	Primary Tumor
283	TCGA-CESC Positive	12.728	Primary Tumor
284	TCGA-CESC Positive	-0.0640527	Blood Derived Normal
285	TCGA-CESC Positive	8.60961	Primary Tumor
286	TCGA-CESC Positive	2.65946	Primary Tumor
287	TCGA-CESC Positive	13.6045	Primary Tumor
288	TCGA-CESC Positive	5.37019	Primary Tumor
289	TCGA-CESC Positive	10.5767	Primary Tumor
290	TCGA-CESC Positive	2.50691	Primary Tumor
291	TCGA-CESC Positive	5.86087	Primary Tumor
292	TCGA-CESC Positive	14.2971	Primary Tumor
293	TCGA-CESC Positive	11.7322	Primary Tumor
294	TCGA-CESC Positive	4.01243	Primary Tumor
295	TCGA-CESC Positive	3.45149	Primary Tumor
296	TCGA-CESC Negative	-2.27588	Primary Tumor
297	TCGA-CESC Positive	12.9834	Primary Tumor
298	TCGA-CESC Positive	14.0901	Primary Tumor
299	TCGA-CESC Positive	5.94052	Primary Tumor
300	TCGA-CESC Positive	-7.41713	Blood Derived Normal
301	TCGA-CESC Positive	7.12954	Primary Tumor
302	TCGA-CESC Positive	11.4715	Primary Tumor
303	TCGA-CESC Positive	-1.37054	Primary Tumor
304	TCGA-CESC Positive	12.0965	Primary Tumor
305	TCGA-CESC Positive	3.85482	Primary Tumor
306	TCGA-CESC Positive	14.3649	Primary Tumor
307	TCGA-CESC Positive	6.97162	Primary Tumor
308	TCGA-CESC Positive	3.16755	Primary Tumor
309	TCGA-CESC Positive	6.38033	Primary Tumor
310	TCGA-CESC Positive	0.0536485	Primary Tumor
311	TCGA-CESC Positive	7.15477	Primary Tumor
312	TCGA-CESC Positive	4.14991	Primary Tumor
313	TCGA-CESC Positive	8.92698	Primary Tumor
314	TCGA-CESC Positive	14.4615	Primary Tumor
315	TCGA-CESC Positive	11.5342	Primary Tumor
316	TCGA-CESC Positive	4.79889	Primary Tumor
317	TCGA-CESC Positive	6.43545	Primary Tumor
318	TCGA-CESC Positive	0.963268	Primary Tumor
319	TCGA-CESC Positive	1.92867	Primary Tumor
320	TCGA-CESC Positive	10.441	Primary Tumor
321	TCGA-CESC Positive	15.6313	Primary Tumor
322	TCGA-CESC Positive	0.496841	Blood Derived Normal
323	TCGA-CESC Positive	6.57759	Primary Tumor
324	TCGA-CESC Positive	4.25906	Primary Tumor
325	TCGA-CESC Positive	8.01017	Primary Tumor
326	TCGA-CESC Positive	-7.62379	Blood Derived Normal
327	TCGA-CESC Positive	7.33733	Primary Tumor
328	TCGA-CESC Negative	-0.646602	Primary Tumor
329	TCGA-CESC Positive	-3.42799	Blood Derived Normal
330	TCGA-CESC Positive	6.59786	Primary Tumor
331	TCGA-CESC Positive	9.38629	Primary Tumor
332	TCGA-CESC Positive	12.4121	Primary Tumor
333	TCGA-CESC Positive	14.7517	Primary Tumor
334	TCGA-CESC Positive	-0.253456	Blood Derived Normal
335	TCGA-CESC Positive	2.9437	Primary Tumor
336	TCGA-CESC Positive	7.88358	Primary Tumor
337	TCGA-CESC Positive	-0.271469	Blood Derived Normal
338	TCGA-CESC Positive	16.0053	Primary Tumor
339	TCGA-CESC Positive	-0.316597	Blood Derived Normal
340	TCGA-CESC Positive	-5.81614	Blood Derived Normal
341	TCGA-CESC Positive	14.9026	Primary Tumor
342	TCGA-CESC Positive	13.1924	Primary Tumor
343	TCGA-CESC Positive	5.53054	Primary Tumor
344	TCGA-CESC Positive	1.8155	Blood Derived Normal
345	TCGA-CESC Positive	3.53864	Primary Tumor
346	TCGA-CESC Positive	-0.473807	Blood Derived Normal
347	TCGA-CESC Negative	12.7877	Primary Tumor
348	TCGA-CESC Positive	13.6439	Primary Tumor
349	TCGA-CESC Positive	10.0263	Primary Tumor
350	TCGA-CESC Negative	3.58842	Primary Tumor
351	TCGA-CESC Positive	1.97937	Primary Tumor
352	TCGA-CESC Positive	-3.71178	Blood Derived Normal
353	TCGA-CESC Negative	-3.27834	Blood Derived Normal
354	TCGA-CESC Positive	5.55612	Primary Tumor
355	TCGA-CESC Positive	6.4435	Primary Tumor
356	TCGA-CESC Positive	7.69063	Primary Tumor
357	TCGA-CESC Positive	15.9491	Primary Tumor
358	TCGA-CESC Negative	2.73074	Blood Derived Normal
359	TCGA-CESC Positive	3.04863	Primary Tumor
360	TCGA-CESC Positive	7.28338	Primary Tumor
361	TCGA-CESC Positive	2.01023	Primary Tumor
362	TCGA-CESC Positive	-4.02121	Primary Tumor
363	TCGA-CESC Positive	6.63526	Primary Tumor
364	TCGA-CESC Positive	2.24183	Primary Tumor
365	TCGA-CESC Positive	11.4663	Primary Tumor
366	TCGA-CESC Positive	14.9631	Primary Tumor
367	TCGA-CESC Positive	12.6531	Primary Tumor
368	TCGA-CESC Positive	14.217	Primary Tumor
369	TCGA-CESC Positive	6.16218	Primary Tumor
370	TCGA-CESC Negative	4.77617	Primary Tumor
371	TCGA-CESC Positive	11.2728	Primary Tumor
372	TCGA-CESC Positive	1.64985	Blood Derived Normal
373	TCGA-CESC Positive	2.82343	Blood Derived Normal
374	TCGA-CESC Positive	11.1551	Primary Tumor
375	TCGA-CESC Positive	6.78393	Primary Tumor
376	TCGA-CESC Positive	3.47574	Primary Tumor
377	TCGA-CESC Positive	2.4468	Blood Derived Normal
378	TCGA-CESC Positive	6.28671	Primary Tumor
379	TCGA-CESC Positive	7.39658	Primary Tumor
380	TCGA-CESC Positive	3.87669	Primary Tumor
381	TCGA-CESC Positive	10.1572	Primary Tumor
382	TCGA-CESC Positive	13.1267	Primary Tumor
383	TCGA-CESC Positive	9.90038	Primary Tumor
384	TCGA-CESC Positive	2.42648	Blood Derived Normal
385	TCGA-CESC Positive	13.943	Primary Tumor
386	TCGA-CESC Positive	9.81442	Primary Tumor
387	TCGA-CESC Positive	-3.72388	Blood Derived Normal
388	TCGA-CESC Positive	0.174801	Blood Derived Normal
389	TCGA-CESC Positive	12.5786	Primary Tumor
390	TCGA-CESC Positive	12.1845	Primary Tumor
391	TCGA-CESC Positive	6.08877	Primary Tumor
392	TCGA-CESC Positive	-1.74074	Primary Tumor
393	TCGA-CESC Positive	9.24884	Primary Tumor
394	TCGA-CESC Positive	3.32926	Blood Derived Normal
395	TCGA-CESC Negative	0.428776	Primary Tumor
396	TCGA-CESC Positive	7.47251	Primary Tumor
397	TCGA-CESC Positive	8.5943	Primary Tumor
398	TCGA-CESC Positive	-0.467135	Blood Derived Normal
399	TCGA-CESC Positive	9.24009	Primary Tumor
400	TCGA-CESC Positive	5.02469	Primary Tumor
401	TCGA-CESC Positive	9.45965	Primary Tumor
402	TCGA-CESC Positive	-0.28113	Blood Derived Normal
403	TCGA-CESC Positive	13.8879	Primary Tumor
404	TCGA-CESC Negative	1.38929	Primary Tumor
405	TCGA-CESC Positive	12.0496	Primary Tumor
406	TCGA-CESC Positive	7.90301	Primary Tumor
407	TCGA-CESC Positive	-5.10688	Primary Tumor
408	TCGA-CESC Positive	4.22316	Primary Tumor
409	TCGA-CESC Positive	13.3696	Primary Tumor
410	TCGA-CESC Positive	0.0437379	Blood Derived Normal
411	TCGA-CESC Positive	12.4402	Primary Tumor
412	TCGA-CESC Positive	-0.476328	Blood Derived Normal
413	TCGA-CESC Positive	7.16768	Primary Tumor
414	TCGA-CESC Positive	14.7122	Primary Tumor
415	TCGA-CESC Negative	-2.33191	Primary Tumor
416	TCGA-CESC Positive	10.5902	Primary Tumor
417	TCGA-CESC Positive	12.4537	Primary Tumor
418	TCGA-CESC Positive	4.90336	Primary Tumor
419	TCGA-CESC Positive	9.34506	Primary Tumor
420	TCGA-CESC Positive	4.18005	Primary Tumor
421	TCGA-CESC Positive	7.59302	Primary Tumor
422	TCGA-CESC Positive	5.54752	Primary Tumor
423	TCGA-CESC Positive	7.77458	Primary Tumor
424	TCGA-CESC Positive	15.0617	Primary Tumor
425	TCGA-CESC Positive	14.4551	Primary Tumor
426	TCGA-CESC Negative	-4.80883	Primary Tumor
427	TCGA-CESC Positive	-6.92515	Blood Derived Normal
428	TCGA-CESC Positive	4.93195	Primary Tumor
429	TCGA-CESC Positive	16.3236	Primary Tumor
430	TCGA-CESC Positive	15.4285	Primary Tumor
431	TCGA-CESC Positive	3.7582	Primary Tumor
432	TCGA-CESC Positive	14.3149	Primary Tumor
433	TCGA-CESC Positive	-1.83909	Primary Tumor
434	TCGA-CESC Positive	12.1279	Primary Tumor
435	TCGA-CESC Positive	-2.24092	Blood Derived Normal
436	TCGA-CESC Negative	-3.51159	Primary Tumor
437	TCGA-CESC Positive	10.6488	Primary Tumor
438	TCGA-CESC Positive	1.90205	Primary Tumor
439	TCGA-CESC Positive	14.0003	Primary Tumor
440	TCGA-CESC Positive	-0.0665846	Blood Derived Normal
441	TCGA-CESC Positive	10.6325	Primary Tumor
442	TCGA-CESC Positive	12.6811	Primary Tumor

## Sheet: Fig 3e
	testValue	HPV	testType
1	Negative	0.756641	p16 Testing
2	Positive	13.2561	p16 Testing
3	Negative	1.36642	p16 Testing
4	Negative	-3.03403	p16 Testing
5	Positive	10.5493	p16 Testing
6	Negative	4.27901	p16 Testing
7	Negative	1.96799	p16 Testing
8	Negative	2.09338	p16 Testing
9	Positive	14.4681	p16 Testing
10	Positive	2.8805	p16 Testing
11	Negative	2.75845	p16 Testing
12	Negative	6.05333	p16 Testing
13	Positive	9.60617	p16 Testing
14	Positive	9.38775	p16 Testing
15	Positive	9.50254	p16 Testing
16	Negative	1.54445	p16 Testing
17	Negative	-1.52176	p16 Testing
18	Positive	13.7924	p16 Testing
19	Negative	2.86855	p16 Testing
20	Positive	12.3713	p16 Testing
21	Positive	15.1307	p16 Testing
22	Negative	4.12038	p16 Testing
23	Negative	0.684518	p16 Testing
24	Negative	-0.0767264	p16 Testing
25	Negative	2.17529	p16 Testing
26	Positive	10.5701	p16 Testing
27	Negative	1.76635	p16 Testing
28	Negative	4.97781	p16 Testing
29	Negative	-0.459324	p16 Testing
30	Negative	0.762906	p16 Testing
31	Negative	0.831931	p16 Testing
32	Negative	-1.57041	p16 Testing
33	Negative	3.30226	p16 Testing
34	Negative	0.0505714	p16 Testing
35	Negative	-0.787957	p16 Testing
36	Negative	3.06714	p16 Testing
37	Negative	-0.923483	p16 Testing
38	Negative	0.888545	p16 Testing
39	Negative	-1.80798	p16 Testing
40	Negative	3.56526	p16 Testing
41	Negative	1.99248	p16 Testing
42	Negative	-0.66357	p16 Testing
43	Negative	-1.21503	p16 Testing
44	Negative	0.654422	p16 Testing
45	Negative	2.6506	p16 Testing
46	Positive	10.6976	p16 Testing
47	Negative	1.77324	p16 Testing
48	Negative	3.70086	p16 Testing
49	Negative	1.50172	p16 Testing
50	Negative	1.87222	p16 Testing
51	Negative	0.723578	p16 Testing
52	Positive	9.20926	p16 Testing
53	Negative	-1.41638	p16 Testing
54	Negative	4.44381	p16 Testing
55	Negative	-2.3527	p16 Testing
56	Negative	1.47308	p16 Testing
57	Negative	3.10343	p16 Testing
58	Negative	0.718396	p16 Testing
59	Negative	3.80488	p16 Testing
60	Negative	3.10615	p16 Testing
61	Positive	14.0589	p16 Testing
62	Positive	4.93494	p16 Testing
63	Negative	2.15185	p16 Testing
64	Positive	9.33382	p16 Testing
65	Positive	11.0291	p16 Testing
66	Positive	4.12525	p16 Testing
67	Negative	0.694747	p16 Testing
68	Positive	15.4212	p16 Testing
69	Negative	-0.654744	p16 Testing
70	Negative	2.82577	p16 Testing
71	Positive	8.98557	p16 Testing
72	Negative	0.672345	p16 Testing
73	Positive	13.0619	p16 Testing
74	Negative	1.54735	p16 Testing
75	Positive	9.89969	p16 Testing
76	Positive	12.7469	p16 Testing
77	Negative	0.599618	p16 Testing
78	Negative	1.25456	p16 Testing
79	Negative	-2.19761	p16 Testing
80	Negative	2.17979	p16 Testing
81	Negative	2.09494	p16 Testing
82	Negative	-1.70975	p16 Testing
83	Negative	-1.92703	p16 Testing
84	Positive	12.2072	p16 Testing
85	Negative	5.2994	p16 Testing
86	Negative	-2.22875	p16 Testing
87	Negative	3.75346	p16 Testing
88	Negative	4.0042	p16 Testing
89	Negative	6.9182	p16 Testing
90	Positive	8.19647	p16 Testing
91	Negative	-1.78376	p16 Testing
92	Negative	3.52399	p16 Testing
93	Positive	13.1788	p16 Testing
94	Negative	-3.11809	p16 Testing
95	Negative	3.10569	p16 Testing
96	Negative	-1.89364	p16 Testing
97	Negative	5.15502	p16 Testing
98	Negative	2.78685	p16 Testing
99	Negative	-0.0349386	p16 Testing
100	Negative	2.91776	p16 Testing
101	Negative	0.756641	ISH Testing
102	Positive	13.2561	ISH Testing
103	Negative	1.36642	ISH Testing
104	Negative	-3.03403	ISH Testing
105	Positive	10.5493	ISH Testing
106	Negative	4.27901	ISH Testing
107	Negative	1.96799	ISH Testing
108	Negative	2.09338	ISH Testing
109	Positive	14.4681	ISH Testing
110	Negative	2.8805	ISH Testing
111	Negative	2.75845	ISH Testing
112	Negative	6.05333	ISH Testing
113	Positive	9.60617	ISH Testing
114	Positive	9.38775	ISH Testing
115	Positive	9.50254	ISH Testing
116	Negative	1.54445	ISH Testing
117	Negative	-1.52176	ISH Testing
118	Positive	13.7924	ISH Testing
119	Negative	2.86855	ISH Testing
120	Positive	12.3713	ISH Testing
121	Positive	15.1307	ISH Testing
122	Negative	4.12038	ISH Testing
123	Negative	0.684518	ISH Testing
124	Negative	-0.0767264	ISH Testing
125	Negative	2.17529	ISH Testing
126	Positive	10.5701	ISH Testing
127	Negative	1.76635	ISH Testing
128	Negative	4.97781	ISH Testing
129	Negative	-0.459324	ISH Testing
130	Negative	0.762906	ISH Testing
131	Negative	0.831931	ISH Testing
132	Negative	-1.57041	ISH Testing
133	Negative	3.30226	ISH Testing
134	Negative	0.0505714	ISH Testing
135	Negative	-0.787957	ISH Testing
136	Negative	3.06714	ISH Testing
137	Negative	-0.923483	ISH Testing
138	Negative	0.888545	ISH Testing
139	Negative	-1.80798	ISH Testing
140	Negative	3.56526	ISH Testing
141	Negative	1.99248	ISH Testing
142	Negative	-0.66357	ISH Testing
143	Negative	-1.21503	ISH Testing
144	Negative	0.654422	ISH Testing
145	Negative	2.6506	ISH Testing
146	Positive	10.6976	ISH Testing
147	Negative	1.77324	ISH Testing
148	Negative	3.70086	ISH Testing
149	Negative	1.50172	ISH Testing
150	Negative	1.87222	ISH Testing
151	Negative	0.723578	ISH Testing
152	Positive	9.20926	ISH Testing
153	Negative	-1.41638	ISH Testing
154	Negative	4.44381	ISH Testing
155	Negative	-2.3527	ISH Testing
156	Negative	1.47308	ISH Testing
157	Negative	3.10343	ISH Testing
158	Negative	0.718396	ISH Testing
159	Negative	3.80488	ISH Testing
160	Negative	3.10615	ISH Testing
161	Positive	14.0589	ISH Testing
162	Positive	4.93494	ISH Testing
163	Negative	2.15185	ISH Testing
164	Positive	9.33382	ISH Testing
165	Positive	11.0291	ISH Testing
166	Negative	4.12525	ISH Testing
167	Negative	0.694747	ISH Testing
168	Positive	15.4212	ISH Testing
169	Negative	-0.654744	ISH Testing
170	Negative	2.82577	ISH Testing
171	Positive	8.98557	ISH Testing
172	Negative	0.672345	ISH Testing
173	Positive	13.0619	ISH Testing
174	Negative	1.54735	ISH Testing
175	Positive	9.89969	ISH Testing
176	Positive	12.7469	ISH Testing
177	Negative	0.599618	ISH Testing
178	Negative	1.25456	ISH Testing
179	Negative	-2.19761	ISH Testing
180	Negative	2.17979	ISH Testing
181	Negative	2.09494	ISH Testing
182	Negative	-1.70975	ISH Testing
183	Negative	-1.92703	ISH Testing
184	Positive	12.2072	ISH Testing
185	Negative	5.2994	ISH Testing
186	Negative	-2.22875	ISH Testing
187	Negative	3.75346	ISH Testing
188	Negative	4.0042	ISH Testing
189	Negative	6.9182	ISH Testing
190	Positive	8.19647	ISH Testing
191	Negative	-1.78376	ISH Testing
192	Negative	3.52399	ISH Testing
193	Positive	13.1788	ISH Testing
194	Negative	-3.11809	ISH Testing
195	Negative	3.10569	ISH Testing
196	Negative	-1.89364	ISH Testing
197	Negative	5.15502	ISH Testing
198	Negative	2.78685	ISH Testing
199	Negative	-0.0349386	ISH Testing
200	Negative	2.91776	ISH Testing

## Sheet: Fig 3f
	history_hepato_carcinoma_risk_factors	k__Viruses.f__Hepadnaviridae.g__Orthohepadnavirus	sample_type
1	Hepatitis_B	12.5086	Primary Tumor
2	Hepatitis_B	15.5347	Primary Tumor
3	Alcohol_consumption	-1.36039	Primary Tumor
4	Alcohol_consumption	0.686041	Primary Tumor
5	Hepatitis_B	-2.68089	Primary Tumor
6	Alcohol_consumption	-0.102959	Primary Tumor
7	Hepatitis_C	1.51832	Solid Tissue Normal
8	Hepatitis_B	17.8192	Primary Tumor
9	Alcohol_consumption	7.76153	Primary Tumor
10	Alcohol_consumption	0.639131	Primary Tumor
11	Alcohol_consumption	-1.7749	Primary Tumor
12	Hepatitis_C	-1.76178	Primary Tumor
13	Alcohol_consumption	0.425319	Primary Tumor
14	Hepatitis_B	13.35	Primary Tumor
15	Hepatitis_B	16.4114	Primary Tumor
16	Alcohol_consumption	13.2576	Primary Tumor
17	Hepatitis_B	6.20634	Solid Tissue Normal
18	Hepatitis_B	18.579	Primary Tumor
19	Hepatitis_B	16.5665	Solid Tissue Normal
20	Alcohol_consumption	0.422266	Primary Tumor
21	Alcohol_consumption	-0.480266	Primary Tumor
22	Hepatitis_C	0.0940523	Primary Tumor
23	Hepatitis_B	14.1886	Primary Tumor
24	Alcohol_consumption	-1.3071	Primary Tumor
25	Hepatitis_B	10.2792	Primary Tumor
26	Hepatitis_B	17.8126	Primary Tumor
27	Hepatitis_B	1.89639	Primary Tumor
28	Alcohol_consumption	0.268941	Primary Tumor
29	Alcohol_consumption	-0.181765	Primary Tumor
30	Alcohol_consumption	0.76101	Primary Tumor
31	Alcohol_consumption	-1.68442	Solid Tissue Normal
32	Hepatitis_C	1.21787	Primary Tumor
33	Alcohol_consumption	1.0461	Blood Derived Normal
34	Hepatitis_B	5.83523	Primary Tumor
35	Alcohol_consumption	17.4653	Primary Tumor
36	Hepatitis_B	1.64954	Primary Tumor
37	Alcohol_consumption	9.70842	Primary Tumor
38	Hepatitis_C	1.08868	Primary Tumor
39	Alcohol_consumption	0.494721	Primary Tumor
40	Alcohol_consumption	-0.518676	Primary Tumor
41	Hepatitis_B	12.417	Primary Tumor
42	Alcohol_consumption	13.7068	Primary Tumor
43	Hepatitis_C	-0.616901	Primary Tumor
44	Hepatitis_B	5.23573	Primary Tumor
45	Alcohol_consumption	-1.53218	Primary Tumor
46	Hepatitis_B	0.078456	Primary Tumor
47	Hepatitis_C	0.855792	Primary Tumor
48	Alcohol_consumption	15.6368	Primary Tumor
49	Hepatitis_B	17.2248	Primary Tumor
50	Alcohol_consumption	-2.76335	Primary Tumor
51	Alcohol_consumption	-0.94795	Primary Tumor
52	Alcohol_consumption	13.0097	Primary Tumor
53	Alcohol_consumption	0.214272	Primary Tumor
54	Hepatitis_B	-1.73837	Primary Tumor
55	Hepatitis_B	-4.96703	Primary Tumor
56	Alcohol_consumption	0.674674	Primary Tumor
57	Alcohol_consumption	-1.21099	Primary Tumor
58	Hepatitis_B	16.6941	Primary Tumor
59	Hepatitis_B	0.00970162	Blood Derived Normal
60	Alcohol_consumption	0.0660934	Primary Tumor
61	Alcohol_consumption	0.0088326	Primary Tumor
62	Alcohol_consumption	0.925484	Primary Tumor
63	Hepatitis_C	-1.14223	Blood Derived Normal
64	Hepatitis_B	8.90024	Primary Tumor
65	Hepatitis_B	10.4602	Primary Tumor
66	Alcohol_consumption	-0.182814	Primary Tumor
67	Hepatitis_B	14.7462	Primary Tumor
68	Hepatitis_B	-1.05053	Primary Tumor
69	Hepatitis_C	0.335554	Primary Tumor
70	Hepatitis_B	12.5173	Primary Tumor
71	Hepatitis_B	-1.57345	Primary Tumor
72	Hepatitis_B	15.5085	Primary Tumor
73	Alcohol_consumption	-0.57399	Primary Tumor
74	Hepatitis_B	9.26141	Primary Tumor
75	Alcohol_consumption	10.9075	Primary Tumor
76	Hepatitis_B	16.1418	Primary Tumor
77	Alcohol_consumption	11.952	Primary Tumor
78	Hepatitis_C	0.67325	Primary Tumor
79	Hepatitis_B	2.52584	Blood Derived Normal
80	Hepatitis_C	-7.27987	Primary Tumor
81	Alcohol_consumption	-1.45475	Primary Tumor
82	Hepatitis_B	13.6797	Solid Tissue Normal
83	Hepatitis_C	1.15438	Solid Tissue Normal
84	Hepatitis_B	16.1543	Solid Tissue Normal
85	Hepatitis_B	2.09318	Primary Tumor
86	Alcohol_consumption	6.29048	Primary Tumor
87	Hepatitis_C	2.12574	Primary Tumor
88	Alcohol_consumption	16.9165	Primary Tumor
89	Alcohol_consumption	-1.21383	Primary Tumor
90	Hepatitis_B	16.0193	Primary Tumor
91	Hepatitis_C	0.227	Primary Tumor
92	Hepatitis_B	12.4831	Primary Tumor
93	Hepatitis_B	-1.08196	Primary Tumor
94	Hepatitis_C	-0.879717	Primary Tumor
95	Alcohol_consumption	13.1641	Primary Tumor
96	Hepatitis_B	15.3765	Primary Tumor
97	Hepatitis_C	0.481923	Primary Tumor
98	Alcohol_consumption	-1.013	Blood Derived Normal
99	Alcohol_consumption	0.870567	Primary Tumor
100	Hepatitis_C	0.201564	Primary Tumor
101	Hepatitis_B	1.63462	Primary Tumor
102	Alcohol_consumption	0.470504	Primary Tumor
103	Alcohol_consumption	0.646093	Primary Tumor
104	Hepatitis_B	16.0824	Primary Tumor
105	Hepatitis_C	11.5906	Primary Tumor
106	Hepatitis_B	-1.90257	Primary Tumor
107	Hepatitis_B	14.5024	Primary Tumor
108	Hepatitis_B	-0.873002	Blood Derived Normal
109	Hepatitis_B	14.7518	Solid Tissue Normal
110	Hepatitis_B	1.97257	Primary Tumor
111	Hepatitis_B	10.4623	Primary Tumor
112	Alcohol_consumption	0.586909	Solid Tissue Normal
113	Hepatitis_B	7.47639	Primary Tumor
114	Hepatitis_B	-1.24509	Primary Tumor
115	Alcohol_consumption	1.16309	Solid Tissue Normal
116	Alcohol_consumption	-1.3152	Primary Tumor
117	Alcohol_consumption	-0.806451	Blood Derived Normal
118	Alcohol_consumption	0.863975	Primary Tumor
119	Hepatitis_B	14.1906	Primary Tumor
120	Alcohol_consumption	0.663858	Primary Tumor
121	Hepatitis_B	7.44078	Primary Tumor
122	Alcohol_consumption	1.13421	Blood Derived Normal
123	Alcohol_consumption	0.783314	Solid Tissue Normal
124	Hepatitis_B	5.70395	Primary Tumor
125	Hepatitis_B	13.6253	Solid Tissue Normal
126	Hepatitis_B	14.8867	Primary Tumor
127	Hepatitis_B	6.62152	Primary Tumor
128	Hepatitis_C	1.44975	Primary Tumor
129	Hepatitis_C	-1.09425	Primary Tumor
130	Alcohol_consumption	-0.788844	Primary Tumor
131	Hepatitis_B	17.3076	Primary Tumor
132	Hepatitis_C	-1.63038	Primary Tumor
133	Hepatitis_C	-1.00118	Primary Tumor
134	Hepatitis_B	9.67066	Primary Tumor
135	Alcohol_consumption	12.523	Primary Tumor
136	Alcohol_consumption	-1.24063	Primary Tumor
137	Hepatitis_B	11.1411	Primary Tumor
138	Hepatitis_B	7.54693	Primary Tumor
139	Alcohol_consumption	16.6639	Primary Tumor
140	Hepatitis_C	1.08756	Blood Derived Normal
141	Alcohol_consumption	-1.86804	Primary Tumor
142	Alcohol_consumption	0.722122	Blood Derived Normal
143	Alcohol_consumption	0.345076	Solid Tissue Normal
144	Alcohol_consumption	0.138811	Primary Tumor
145	Alcohol_consumption	-1.84275	Primary Tumor
146	Hepatitis_C	-0.865466	Primary Tumor
147	Alcohol_consumption	-1.75406	Solid Tissue Normal
148	Alcohol_consumption	-1.65616	Blood Derived Normal
149	Hepatitis_C	-1.92756	Primary Tumor
150	Hepatitis_B	16.5404	Primary Tumor
151	Alcohol_consumption	6.22864	Primary Tumor
152	Alcohol_consumption	15.1797	Primary Tumor
153	Hepatitis_C	4.99165	Primary Tumor
154	Hepatitis_B	10.9577	Primary Tumor
155	Alcohol_consumption	1.28672	Primary Tumor
156	Hepatitis_C	-2.14874	Primary Tumor
157	Hepatitis_B	13.7517	Primary Tumor
158	Hepatitis_B	15.0925	Primary Tumor
159	Alcohol_consumption	-0.609142	Primary Tumor
160	Hepatitis_B	13.8916	Primary Tumor
161	Alcohol_consumption	0.626573	Primary Tumor
162	Hepatitis_C	-0.544166	Blood Derived Normal
163	Alcohol_consumption	1.03766	Solid Tissue Normal
164	Hepatitis_B	1.23316	Primary Tumor
165	Alcohol_consumption	0.211673	Primary Tumor
166	Hepatitis_B	16.782	Primary Tumor
167	Alcohol_consumption	-1.23128	Primary Tumor
168	Hepatitis_C	-1.35329	Primary Tumor
169	Alcohol_consumption	0.833452	Primary Tumor
170	Alcohol_consumption	9.44588	Primary Tumor
171	Hepatitis_B	9.17298	Primary Tumor
172	Hepatitis_B	10.1687	Primary Tumor
173	Hepatitis_B	16.7002	Primary Tumor
174	Hepatitis_B	-1.21248	Primary Tumor
175	Hepatitis_B	17.4193	Solid Tissue Normal
176	Hepatitis_B	13.8103	Primary Tumor
177	Alcohol_consumption	18.0343	Primary Tumor
178	Hepatitis_C	1.39413	Primary Tumor
179	Hepatitis_B	-1.16569	Primary Tumor
180	Hepatitis_B	16.2975	Primary Tumor
181	Hepatitis_B	11.6376	Primary Tumor
182	Hepatitis_C	0.701836	Primary Tumor
183	Hepatitis_B	8.80896	Primary Tumor
184	Hepatitis_B	13.5427	Primary Tumor
185	Alcohol_consumption	0.114656	Primary Tumor
186	Hepatitis_B	11.8363	Primary Tumor
187	Alcohol_consumption	-2.88722	Primary Tumor
188	Hepatitis_C	0.417095	Primary Tumor
189	Hepatitis_C	-3.57856	Primary Tumor
190	Alcohol_consumption	-1.06547	Primary Tumor
191	Alcohol_consumption	0.419964	Primary Tumor
192	Hepatitis_C	0.358413	Primary Tumor
193	Alcohol_consumption	0.268965	Primary Tumor
194	Alcohol_consumption	0.770545	Primary Tumor
195	Hepatitis_C	1.18895	Blood Derived Normal
196	Hepatitis_B	12.9815	Primary Tumor
197	Hepatitis_B	9.4051	Primary Tumor
198	Alcohol_consumption	-2.60912	Primary Tumor
199	Hepatitis_B	4.29114	Primary Tumor
200	Hepatitis_C	7.34564	Primary Tumor
201	Hepatitis_C	0.373586	Primary Tumor
202	Hepatitis_C	0.607327	Primary Tumor
203	Alcohol_consumption	-2.88035	Primary Tumor
204	Alcohol_consumption	-0.2025	Solid Tissue Normal
205	Hepatitis_C	1.11536	Solid Tissue Normal
206	Alcohol_consumption	1.25981	Primary Tumor
207	Hepatitis_B	-2.25257	Primary Tumor
208	Hepatitis_B	15.2123	Primary Tumor
209	Alcohol_consumption	1.02146	Blood Derived Normal
210	Hepatitis_C	-2.49531	Solid Tissue Normal
211	Hepatitis_B	8.73795	Primary Tumor
212	Hepatitis_B	5.89007	Primary Tumor
213	Alcohol_consumption	0.402152	Primary Tumor
214	Alcohol_consumption	1.15517	Solid Tissue Normal
215	Hepatitis_B	7.28159	Primary Tumor
216	Alcohol_consumption	0.927281	Blood Derived Normal
217	Alcohol_consumption	-0.0778467	Primary Tumor
218	Alcohol_consumption	15.0112	Primary Tumor
219	Hepatitis_B	7.33183	Blood Derived Normal

## Sheet: Fig 3g
	Molecular.Subtype	LCV	sample_type
1	CIN	-0.0593839	Primary Tumor
2	GS	-3.28702	Primary Tumor
3	EBV	11.7772	Primary Tumor
4	MSI	-0.902947	Primary Tumor
5	CIN	-1.12224	Primary Tumor
6	MSI	-0.488704	Primary Tumor
7	CIN	-2.30892	Primary Tumor
8	CIN	3.50931	Primary Tumor
9	CIN	-2.2129	Primary Tumor
10	CIN	1.67914	Solid Tissue Normal
11	CIN	8.33747	Primary Tumor
12	CIN	-1.75493	Primary Tumor
13	MSI	-0.0751442	Primary Tumor
14	CIN	1.94605	Primary Tumor
15	MSI	3.41993	Primary Tumor
16	GS	0.789801	Primary Tumor
17	MSI	3.54151	Primary Tumor
18	CIN	-2.20381	Primary Tumor
19	MSI	-2.37166	Solid Tissue Normal
20	EBV	12.6092	Primary Tumor
21	MSI	3.21729	Primary Tumor
22	EBV	-0.643628	Blood Derived Normal
23	CIN	5.57477	Primary Tumor
24	CIN	4.39313	Primary Tumor
25	CIN	-0.00272651	Primary Tumor
26	CIN	3.53527	Primary Tumor
27	CIN	-0.663252	Primary Tumor
28	EBV	13.8297	Primary Tumor
29	GS	-2.28631	Primary Tumor
30	CIN	-0.978454	Blood Derived Normal
31	MSI	-4.33487	Primary Tumor
32	EBV	11.0787	Primary Tumor
33	CIN	-0.599176	Primary Tumor
34	CIN	3.14535	Primary Tumor
35	CIN	-1.27797	Blood Derived Normal
36	CIN	2.23294	Primary Tumor
37	GS	-1.06481	Primary Tumor
38	GS	0.093326	Primary Tumor
39	CIN	-2.00215	Primary Tumor
40	CIN	-2.87359	Primary Tumor
41	GS	-1.60557	Primary Tumor
42	CIN	2.94376	Primary Tumor
43	MSI	-0.345294	Primary Tumor
44	CIN	-4.35718	Primary Tumor
45	EBV	14.0286	Primary Tumor
46	EBV	13.3893	Primary Tumor
47	EBV	12.96	Primary Tumor
48	CIN	2.38748	Primary Tumor
49	GS	-0.086619	Primary Tumor
50	CIN	-0.0549559	Primary Tumor
51	MSI	-3.56898	Primary Tumor
52	GS	-1.06653	Primary Tumor
53	CIN	0.72294	Blood Derived Normal
54	MSI	-2.5297	Primary Tumor
55	MSI	-1.37024	Solid Tissue Normal
56	EBV	14.7027	Primary Tumor
57	EBV	12.9056	Primary Tumor
58	MSI	1.44103	Primary Tumor
59	GS	-2.9703	Primary Tumor
60	EBV	7.81452	Primary Tumor
61	GS	-2.19711	Primary Tumor
62	CIN	-2.55837	Primary Tumor
63	CIN	2.4118	Primary Tumor
64	CIN	-2.37678	Primary Tumor
65	CIN	-2.72143	Primary Tumor
66	GS	-2.74406	Primary Tumor
67	MSI	-1.76418	Solid Tissue Normal
68	GS	-1.52428	Primary Tumor
69	MSI	-1.2716	Blood Derived Normal
70	CIN	-0.337126	Primary Tumor
71	MSI	-1.56803	Primary Tumor
72	GS	1.86108	Primary Tumor
73	CIN	4.09226	Primary Tumor
74	CIN	0.776418	Blood Derived Normal
75	CIN	-2.20677	Primary Tumor
76	CIN	-0.599176	Primary Tumor
77	CIN	-0.616411	Primary Tumor
78	GS	0.143889	Primary Tumor
79	MSI	1.90794	Primary Tumor
80	GS	-2.86607	Solid Tissue Normal
81	MSI	0.157857	Primary Tumor
82	CIN	-2.37607	Primary Tumor
83	CIN	-1.30261	Blood Derived Normal
84	CIN	-0.883986	Blood Derived Normal
85	MSI	-4.33488	Primary Tumor
86	EBV	10.7344	Primary Tumor
87	CIN	3.65384	Primary Tumor
88	CIN	-0.331373	Primary Tumor
89	CIN	4.25794	Primary Tumor
90	EBV	13.4375	Primary Tumor
91	CIN	5.65925	Primary Tumor
92	CIN	-0.452218	Primary Tumor
93	CIN	0.173385	Primary Tumor
94	GS	-1.09197	Blood Derived Normal
95	GS	-2.1972	Primary Tumor
96	MSI	-0.333533	Primary Tumor
97	GS	-0.989592	Solid Tissue Normal
98	CIN	0.48798	Primary Tumor
99	MSI	-0.130663	Primary Tumor
100	EBV	14.4508	Primary Tumor
101	CIN	4.0964	Primary Tumor
102	MSI	-3.37927	Primary Tumor
103	GS	-3.07216	Primary Tumor
104	CIN	0.456773	Blood Derived Normal
105	CIN	-1.85268	Primary Tumor
106	MSI	-1.39262	Blood Derived Normal
107	CIN	1.35603	Primary Tumor
108	MSI	5.07334	Primary Tumor
109	MSI	-3.29528	Primary Tumor
110	CIN	-2.44574	Primary Tumor
111	MSI	4.13958	Primary Tumor
112	CIN	-2.20955	Solid Tissue Normal
113	CIN	0.188879	Primary Tumor
114	CIN	4.39146	Primary Tumor
115	MSI	-3.29525	Primary Tumor
116	MSI	1.74262	Primary Tumor
117	CIN	1.98461	Primary Tumor
118	CIN	4.68598	Primary Tumor
119	CIN	-0.153371	Primary Tumor
120	MSI	-0.699076	Primary Tumor
121	MSI	2.86798	Primary Tumor
122	CIN	3.41411	Primary Tumor
123	MSI	-1.50203	Solid Tissue Normal
124	GS	-0.254544	Primary Tumor
125	GS	0.0128781	Primary Tumor
126	EBV	13.4768	Primary Tumor
127	MSI	0.629989	Primary Tumor
128	GS	-0.180218	Primary Tumor
129	MSI	-1.20864	Primary Tumor
130	MSI	4.82627	Primary Tumor
131	CIN	5.18465	Primary Tumor
132	MSI	5.89269	Primary Tumor
133	CIN	-0.861433	Primary Tumor
134	CIN	-1.42	Blood Derived Normal
135	GS	5.90366	Primary Tumor
136	CIN	-3.9927	Solid Tissue Normal
137	EBV	13.3698	Primary Tumor
138	CIN	-0.0402505	Primary Tumor
139	GS	-1.10823	Blood Derived Normal
140	CIN	-1.04452	Blood Derived Normal
141	GS	-4.47573	Primary Tumor
142	GS	-0.619414	Primary Tumor
143	CIN	1.34644	Primary Tumor
144	EBV	13.6714	Primary Tumor
145	CIN	-0.570417	Primary Tumor
146	CIN	0.0226291	Primary Tumor
147	CIN	1.94605	Primary Tumor
148	CIN	-2.0938	Solid Tissue Normal
149	CIN	5.45783	Primary Tumor
150	CIN	0.0285969	Primary Tumor
151	CIN	2.23665	Primary Tumor
152	MSI	1.25663	Primary Tumor
153	MSI	1.74262	Primary Tumor
154	MSI	1.02536	Primary Tumor
155	CIN	0.732151	Blood Derived Normal
156	GS	-1.60558	Primary Tumor
157	CIN	-0.0800419	Primary Tumor
158	CIN	-2.55007	Primary Tumor
159	MSI	-1.54338	Solid Tissue Normal
160	GS	0.765392	Primary Tumor
161	CIN	-0.713751	Primary Tumor
162	CIN	-4.21842	Solid Tissue Normal
163	CIN	0.562317	Primary Tumor
164	MSI	-2.19356	Primary Tumor
165	CIN	3.15187	Primary Tumor
166	GS	3.19737	Primary Tumor
167	MSI	3.31148	Primary Tumor
168	CIN	5.07932	Primary Tumor
169	MSI	0.000334796	Primary Tumor
170	MSI	-0.53295	Primary Tumor
171	CIN	1.33331	Primary Tumor
172	CIN	-0.397273	Primary Tumor
173	CIN	0.309841	Primary Tumor
174	MSI	-1.30849	Primary Tumor
175	GS	0.765254	Primary Tumor
176	CIN	-1.15276	Primary Tumor
177	CIN	-1.5907	Blood Derived Normal
178	CIN	-2.44443	Primary Tumor
179	MSI	4.86725	Primary Tumor
180	MSI	2.36593	Primary Tumor
181	MSI	0.629989	Primary Tumor
182	CIN	-0.0624155	Primary Tumor
183	EBV	-1.02388	Blood Derived Normal
184	GS	-0.137569	Primary Tumor
185	EBV	0.405743	Blood Derived Normal
186	CIN	-0.0623731	Primary Tumor
187	GS	-2.33849	Primary Tumor
188	CIN	-3.28096	Primary Tumor
189	EBV	10.4526	Primary Tumor
190	GS	-2.43241	Primary Tumor
191	MSI	3.21667	Primary Tumor
192	CIN	-1.55584	Blood Derived Normal
193	CIN	1.99637	Primary Tumor
194	MSI	-0.961378	Primary Tumor
195	GS	1.96071	Primary Tumor
196	MSI	3.54153	Primary Tumor
197	CIN	-2.58579	Primary Tumor
198	CIN	-2.87357	Primary Tumor
199	GS	4.57476	Primary Tumor
200	MSI	-3.59122	Primary Tumor
201	EBV	14.9394	Primary Tumor
202	CIN	0.154833	Primary Tumor
203	CIN	-1.0524	Blood Derived Normal
204	EBV	13.9447	Primary Tumor
205	MSI	3.76286	Solid Tissue Normal
206	MSI	-0.718357	Solid Tissue Normal
207	EBV	13.3088	Primary Tumor
208	CIN	0.357288	Blood Derived Normal
209	CIN	-2.58579	Primary Tumor
210	CIN	-0.133158	Primary Tumor
211	CIN	-2.43025	Primary Tumor
212	EBV	11.5083	Primary Tumor
213	CIN	1.37642	Solid Tissue Normal
214	CIN	-0.156443	Primary Tumor
215	GS	-0.994329	Primary Tumor
216	CIN	-1.91119	Primary Tumor
217	GS	0.857466	Solid Tissue Normal
218	CIN	-0.203	Primary Tumor
219	CIN	2.98813	Solid Tissue Normal
220	CIN	1.82987	Blood Derived Normal
221	CIN	-2.39677	Primary Tumor
222	CIN	1.07806	Primary Tumor
223	GS	-3.09711	Primary Tumor
224	CIN	-0.540835	Primary Tumor
225	CIN	-1.91908	Blood Derived Normal
226	MSI	-1.02247	Primary Tumor
227	MSI	4.07859	Primary Tumor
228	CIN	-0.993468	Solid Tissue Normal
229	CIN	-1.01497	Solid Tissue Normal
230	MSI	3.41037	Primary Tumor
231	CIN	-1.84066	Blood Derived Normal
232	CIN	-3.28099	Primary Tumor
233	CIN	-2.14362	Blood Derived Normal
234	CIN	-1.38087	Primary Tumor
235	GS	0.961422	Primary Tumor
236	GS	-3.03972	Primary Tumor
237	MSI	-2.16978	Solid Tissue Normal
238	GS	3.84124	Primary Tumor
239	CIN	-0.136373	Primary Tumor
240	CIN	-0.453022	Primary Tumor
241	MSI	-0.130663	Primary Tumor
242	CIN	1.46262	Primary Tumor
243	CIN	-1.08646	Primary Tumor
244	GS	-0.935306	Primary Tumor
245	CIN	1.52158	Blood Derived Normal
246	EBV	14.7947	Primary Tumor
247	MSI	4.68785	Primary Tumor
248	MSI	3.31158	Primary Tumor
249	MSI	5.89109	Primary Tumor
250	GS	0.838794	Blood Derived Normal
251	MSI	-1.76418	Solid Tissue Normal
252	CIN	1.56368	Blood Derived Normal
253	CIN	-1.1351	Blood Derived Normal
254	GS	4.86845	Primary Tumor
255	GS	-0.800231	Blood Derived Normal
256	CIN	1.99645	Primary Tumor
257	CIN	0.0029171	Primary Tumor
258	MSI	1.57802	Primary Tumor
259	GS	-0.895695	Primary Tumor
260	CIN	6.12077	Primary Tumor
261	EBV	12.4995	Primary Tumor
262	CIN	-1.53967	Primary Tumor
263	EBV	13.36	Primary Tumor
264	MSI	-0.614612	Solid Tissue Normal
265	CIN	-3.2685	Primary Tumor
266	MSI	7.33425	Primary Tumor
267	CIN	0.284667	Blood Derived Normal
268	MSI	-2.5036	Primary Tumor
269	GS	0.781088	Primary Tumor
270	GS	-3.7877	Primary Tumor
271	CIN	-0.386744	Solid Tissue Normal
272	GS	1.45266	Primary Tumor
273	MSI	1.0623	Solid Tissue Normal
274	CIN	-2.50973	Primary Tumor
275	CIN	-1.02526	Solid Tissue Normal
276	CIN	-0.47309	Blood Derived Normal
277	EBV	13.1702	Primary Tumor
278	CIN	4.01856	Primary Tumor
279	GS	-1.69761	Primary Tumor
280	GS	-1.78123	Solid Tissue Normal
281	MSI	-2.24127	Primary Tumor
282	CIN	-0.825224	Primary Tumor
283	MSI	-1.56803	Primary Tumor
284	MSI	-2.06023	Primary Tumor
285	GS	-1.03316	Primary Tumor
286	MSI	-0.366844	Primary Tumor
287	CIN	-1.30668	Blood Derived Normal
288	EBV	-0.402913	Solid Tissue Normal
289	MSI	-0.995788	Primary Tumor
290	MSI	-1.26559	Solid Tissue Normal
291	GS	-1.24881	Primary Tumor
292	CIN	-1.37957	Blood Derived Normal
293	CIN	1.09368	Primary Tumor
294	CIN	-2.07524	Solid Tissue Normal
295	GS	-2.28633	Primary Tumor
296	CIN	2.4118	Primary Tumor
297	CIN	-0.753384	Primary Tumor
298	EBV	0.757952	Blood Derived Normal
299	CIN	0.796189	Solid Tissue Normal
300	CIN	5.65925	Primary Tumor
301	CIN	-1.28341	Primary Tumor
302	CIN	-0.337174	Primary Tumor
303	GS	4.01318	Primary Tumor
304	CIN	-1.61192	Primary Tumor
305	CIN	0.74412	Solid Tissue Normal
306	MSI	-0.662537	Solid Tissue Normal
307	CIN	6.12015	Primary Tumor
308	GS	1.86056	Primary Tumor
309	CIN	-1.6296	Blood Derived Normal
310	CIN	-1.47429	Solid Tissue Normal
311	MSI	-0.465242	Primary Tumor
312	CIN	-0.0727245	Blood Derived Normal
313	CIN	6.97117	Primary Tumor
314	MSI	3.54451	Primary Tumor
315	GS	-2.43494	Primary Tumor
316	MSI	7.33477	Primary Tumor
317	CIN	-4.21842	Solid Tissue Normal
318	CIN	2.27806	Primary Tumor
319	CIN	0.222787	Primary Tumor
320	EBV	14.702	Primary Tumor
321	CIN	1.09953	Blood Derived Normal
322	CIN	1.34406	Primary Tumor
323	MSI	-3.59117	Primary Tumor
324	CIN	0.661917	Primary Tumor
325	CIN	0.732151	Blood Derived Normal
326	EBV	14.7947	Primary Tumor
327	CIN	2.3848	Primary Tumor
328	MSI	-3.05552	Primary Tumor
329	CIN	-0.691831	Primary Tumor
330	CIN	-0.127491	Primary Tumor
331	GS	3.8428	Primary Tumor
332	CIN	0.348191	Primary Tumor
333	CIN	2.55778	Solid Tissue Normal
334	EBV	13.5839	Primary Tumor
335	EBV	13.2561	Primary Tumor
336	MSI	3.14185	Primary Tumor
337	GS	-1.57099	Primary Tumor
338	GS	-2.00547	Blood Derived Normal
339	CIN	-0.83121	Primary Tumor
340	GS	-3.06276	Primary Tumor
341	CIN	-3.02048	Primary Tumor
342	GS	0.331785	Solid Tissue Normal
343	MSI	-1.47134	Blood Derived Normal
344	CIN	-3.20566	Solid Tissue Normal
345	MSI	-2.74387	Primary Tumor
346	CIN	-0.766277	Solid Tissue Normal
347	CIN	-0.733242	Blood Derived Normal
348	CIN	-0.125079	Solid Tissue Normal
349	CIN	-2.00476	Primary Tumor
350	EBV	-1.00672	Blood Derived Normal
351	CIN	5.40034	Primary Tumor
352	GS	1.04921	Primary Tumor
353	CIN	3.15206	Primary Tumor
354	CIN	4.85641	Primary Tumor
355	CIN	-0.804283	Primary Tumor
356	EBV	0.70672	Blood Derived Normal
357	CIN	0.661786	Primary Tumor
358	CIN	1.18806	Primary Tumor
359	CIN	4.31936	Primary Tumor
360	CIN	1.05487	Blood Derived Normal
361	GS	1.86149	Solid Tissue Normal
362	GS	0.331763	Solid Tissue Normal
363	GS	4.25744	Primary Tumor
364	CIN	-1.86719	Solid Tissue Normal
365	MSI	-2.59195	Solid Tissue Normal
366	GS	-2.9703	Primary Tumor
367	CIN	-0.0707801	Blood Derived Normal
368	MSI	0.53883	Primary Tumor
369	CIN	3.50931	Primary Tumor
370	CIN	2.41613	Primary Tumor
371	CIN	-0.157651	Blood Derived Normal
372	CIN	-1.77332	Blood Derived Normal
373	GS	-1.29364	Primary Tumor
374	CIN	-0.831114	Primary Tumor
375	CIN	-0.615782	Primary Tumor
376	CIN	-1.66452	Solid Tissue Normal
377	MSI	2.36586	Primary Tumor
378	CIN	-2.07388	Solid Tissue Normal
379	GS	-3.13076	Solid Tissue Normal
380	GS	-0.837955	Primary Tumor
381	CIN	-3.18583	Primary Tumor
382	CIN	-0.214833	Primary Tumor
383	CIN	-2.56482	Primary Tumor
384	CIN	1.05466	Primary Tumor
385	GS	-2.6915	Primary Tumor
386	CIN	8.33988	Primary Tumor
387	MSI	-1.96437	Primary Tumor
388	CIN	2.48034	Primary Tumor
389	CIN	5.68019	Primary Tumor
390	CIN	-0.426922	Primary Tumor
391	CIN	3.53525	Primary Tumor
392	GS	0.780651	Primary Tumor
393	GS	-2.52093	Primary Tumor
394	EBV	13.1667	Primary Tumor
395	CIN	-2.30885	Primary Tumor
396	CIN	-1.80022	Primary Tumor
397	MSI	-3.00795	Solid Tissue Normal
398	CIN	-2.20379	Primary Tumor
399	MSI	2.04772	Primary Tumor
400	MSI	2.08558	Primary Tumor
401	CIN	0.744112	Solid Tissue Normal
402	CIN	-1.07296	Blood Derived Normal
403	GS	-2.96412	Primary Tumor
404	EBV	11.321	Primary Tumor
405	CIN	-2.26322	Primary Tumor
406	CIN	-0.753384	Primary Tumor
407	GS	-3.09711	Primary Tumor
408	GS	-3.07216	Primary Tumor
409	MSI	3.37283	Primary Tumor
410	CIN	-2.16086	Blood Derived Normal
411	MSI	-0.486467	Solid Tissue Normal
412	CIN	-2.40476	Primary Tumor
413	CIN	2.98813	Solid Tissue Normal
414	EBV	11.7272	Primary Tumor
415	CIN	-0.94968	Primary Tumor
416	GS	-2.65354	Primary Tumor
417	CIN	-1.58663	Primary Tumor
418	CIN	3.09162	Primary Tumor
419	MSI	-2.36667	Primary Tumor
420	MSI	3.76131	Solid Tissue Normal
421	CIN	1.9702	Primary Tumor
422	EBV	13.466	Primary Tumor
423	GS	-3.03972	Primary Tumor
424	CIN	-1.47155	Primary Tumor
425	CIN	-1.38713	Solid Tissue Normal
426	GS	-0.906625	Blood Derived Normal
427	CIN	-1.86559	Solid Tissue Normal
428	MSI	1.34545	Primary Tumor
429	CIN	-4.3572	Primary Tumor
430	GS	-0.254544	Primary Tumor
431	CIN	-0.453049	Primary Tumor
432	MSI	-0.907137	Solid Tissue Normal
433	MSI	4.82627	Primary Tumor
434	CIN	5.42811	Primary Tumor
435	EBV	13.4371	Primary Tumor
436	EBV	2.80304	Solid Tissue Normal
437	CIN	8.80074	Primary Tumor
438	CIN	4.63878	Primary Tumor
439	CIN	-0.540835	Primary Tumor
440	GS	2.28	Primary Tumor
441	GS	5.90586	Primary Tumor
442	MSI	4.2235	Primary Tumor
443	CIN	-0.487599	Primary Tumor
444	MSI	7.31162	Primary Tumor
445	CIN	-0.256589	Blood Derived Normal
446	EBV	14.0278	Primary Tumor
447	CIN	-0.555505	Blood Derived Normal
448	EBV	13.8289	Primary Tumor
449	GS	-2.50239	Primary Tumor
450	GS	0.394738	Primary Tumor
451	GS	1.35587	Solid Tissue Normal
452	EBV	-1.47062	Blood Derived Normal
453	GS	-1.05623	Primary Tumor
454	EBV	12.497	Primary Tumor
455	CIN	0.118625	Primary Tumor
456	CIN	1.33331	Primary Tumor
457	GS	-1.29507	Blood Derived Normal
458	CIN	1.33237	Primary Tumor
459	EBV	12.906	Primary Tumor
460	EBV	12.6445	Primary Tumor
461	CIN	6.24805	Primary Tumor
462	MSI	3.54456	Primary Tumor
463	EBV	14.4508	Primary Tumor
464	CIN	0.0675734	Primary Tumor
465	CIN	1.9702	Primary Tumor
466	MSI	-2.44715	Solid Tissue Normal
467	CIN	-2.59534	Primary Tumor
468	CIN	-1.13644	Primary Tumor
469	CIN	2.3385	Primary Tumor
470	MSI	0.626847	Primary Tumor
471	CIN	-3.26268	Primary Tumor
472	MSI	-1.20864	Primary Tumor
473	CIN	2.20384	Primary Tumor
474	GS	-0.465909	Solid Tissue Normal
475	CIN	5.22376	Primary Tumor
476	EBV	15.3854	Primary Tumor
477	MSI	0.950213	Solid Tissue Normal
478	GS	-2.86607	Solid Tissue Normal
479	CIN	-0.644252	Primary Tumor
480	CIN	4.67586	Primary Tumor
481	EBV	-0.741459	Blood Derived Normal
482	EBV	13.3705	Primary Tumor
483	CIN	-4.75422	Primary Tumor
484	GS	-2.03224	Primary Tumor
485	CIN	-1.64519	Blood Derived Normal
486	EBV	14.9394	Primary Tumor
487	MSI	-0.437034	Solid Tissue Normal
488	EBV	13.6921	Primary Tumor
489	CIN	-0.362308	Primary Tumor
490	CIN	2.3385	Primary Tumor
491	MSI	-2.74384	Primary Tumor
492	CIN	2.74631	Primary Tumor
493	CIN	4.63877	Primary Tumor
494	MSI	4.13952	Primary Tumor
495	MSI	0.0713896	Solid Tissue Normal
496	CIN	-2.25616	Primary Tumor
497	CIN	5.40032	Primary Tumor
498	EBV	0.278305	Blood Derived Normal
499	CIN	-0.825224	Primary Tumor
500	EBV	11.8402	Primary Tumor
501	CIN	6.97114	Primary Tumor
502	CIN	5.42899	Primary Tumor
503	MSI	-2.3644	Primary Tumor
504	CIN	-2.21898	Primary Tumor
505	MSI	-0.522214	Solid Tissue Normal
506	GS	1.88169	Primary Tumor
507	EBV	13.3893	Primary Tumor
508	GS	1.1892	Blood Derived Normal
509	CIN	-2.67914	Primary Tumor
510	CIN	1.85134	Primary Tumor
511	CIN	1.40898	Solid Tissue Normal
512	CIN	4.26845	Primary Tumor
513	MSI	-0.427498	Primary Tumor
514	CIN	-1.28609	Solid Tissue Normal
515	CIN	-1.52564	Blood Derived Normal
516	MSI	3.8569	Solid Tissue Normal
517	EBV	7.81487	Primary Tumor
518	CIN	-0.597928	Solid Tissue Normal
519	GS	3.25006	Primary Tumor
520	MSI	-3.37927	Primary Tumor
521	CIN	4.68611	Primary Tumor
522	MSI	-1.39262	Blood Derived Normal
523	GS	2.50437	Primary Tumor
524	MSI	-2.3595	Solid Tissue Normal
525	CIN	1.78291	Primary Tumor
526	CIN	-1.8547	Blood Derived Normal
527	GS	-0.998514	Primary Tumor
528	CIN	-2.71846	Primary Tumor
529	CIN	-3.09242	Primary Tumor
530	GS	-0.294124	Solid Tissue Normal
531	CIN	-1.37736	Solid Tissue Normal
532	GS	-2.70231	Primary Tumor
533	CIN	-2.29197	Primary Tumor
534	CIN	-1.80946	Solid Tissue Normal
535	CIN	0.310508	Primary Tumor
536	MSI	-2.5297	Primary Tumor
537	MSI	-0.959394	Primary Tumor
538	CIN	0.474831	Blood Derived Normal
539	CIN	0.349137	Primary Tumor
540	CIN	0.987112	Primary Tumor
541	EBV	12.0655	Primary Tumor
542	EBV	11.8756	Primary Tumor
543	CIN	-0.340609	Primary Tumor
544	CIN	0.377029	Blood Derived Normal
545	GS	4.25164	Primary Tumor
546	MSI	4.22312	Primary Tumor
547	CIN	-0.461929	Solid Tissue Normal
548	MSI	-3.07736	Primary Tumor
549	CIN	-1.07953	Primary Tumor
550	GS	-0.418949	Primary Tumor
551	CIN	-1.08243	Blood Derived Normal
552	MSI	-0.897103	Primary Tumor
553	CIN	-1.79701	Primary Tumor
554	GS	0.0940852	Primary Tumor
555	GS	1.25935	Blood Derived Normal
556	CIN	6.24809	Primary Tumor
557	CIN	3.72786	Primary Tumor
558	EBV	11.7284	Primary Tumor
559	EBV	13.2536	Primary Tumor
560	GS	2.83841	Primary Tumor
561	GS	-4.47574	Primary Tumor
562	GS	-1.57087	Primary Tumor
563	GS	0.894382	Blood Derived Normal
564	GS	-1.352	Primary Tumor
565	CIN	-0.972684	Primary Tumor
566	MSI	7.31163	Primary Tumor
567	CIN	4.67936	Primary Tumor
568	CIN	-2.56729	Primary Tumor
569	CIN	-1.51919	Primary Tumor
570	MSI	-0.631209	Solid Tissue Normal
571	CIN	-1.73811	Primary Tumor
572	GS	-2.96409	Primary Tumor
573	CIN	-1.66452	Solid Tissue Normal
574	MSI	0.633871	Blood Derived Normal
575	CIN	1.40894	Solid Tissue Normal
576	CIN	-0.609984	Primary Tumor
577	CIN	-0.0788337	Primary Tumor
578	MSI	-3.56898	Primary Tumor
579	CIN	0.855932	Primary Tumor
580	CIN	-1.26795	Blood Derived Normal
581	CIN	-1.28643	Solid Tissue Normal
582	MSI	1.71018	Blood Derived Normal
583	CIN	0.311894	Primary Tumor
584	CIN	-2.26444	Primary Tumor
585	MSI	5.07277	Primary Tumor
586	GS	3.44974	Primary Tumor
587	GS	-0.994329	Primary Tumor
588	CIN	-0.520716	Solid Tissue Normal
589	MSI	-0.744672	Primary Tumor
590	CIN	-0.460902	Blood Derived Normal
591	MSI	6.15678	Primary Tumor
592	CIN	-2.72512	Primary Tumor
593	CIN	-2.20955	Solid Tissue Normal
594	MSI	1.89737	Primary Tumor
595	CIN	-4.75422	Primary Tumor
596	EBV	0.544492	Blood Derived Normal
597	MSI	-2.83935	Primary Tumor
598	CIN	0.74139	Primary Tumor
599	CIN	-0.491307	Blood Derived Normal
600	GS	-1.03316	Primary Tumor
601	CIN	-1.62971	Primary Tumor
602	EBV	-1.03939	Blood Derived Normal
603	EBV	11.638	Primary Tumor
604	CIN	4.25799	Primary Tumor
605	CIN	5.07953	Primary Tumor
606	CIN	2.05264	Primary Tumor
607	GS	0.0128781	Primary Tumor
608	CIN	-0.974376	Primary Tumor
609	CIN	8.80074	Primary Tumor
610	MSI	-0.483273	Solid Tissue Normal
611	MSI	5.56412	Primary Tumor
612	CIN	2.74278	Primary Tumor
613	CIN	3.79571	Primary Tumor
614	CIN	0.922281	Blood Derived Normal
615	CIN	1.19915	Primary Tumor
616	CIN	-1.18949	Solid Tissue Normal
617	GS	0.961448	Primary Tumor
618	CIN	5.57477	Primary Tumor
619	MSI	-1.19756	Blood Derived Normal
620	CIN	-2.32413	Primary Tumor
621	CIN	1.78361	Primary Tumor
622	CIN	-1.53291	Primary Tumor
623	CIN	1.03966	Primary Tumor
624	MSI	5.55819	Primary Tumor
625	CIN	-2.79833	Primary Tumor
626	GS	-1.4476	Blood Derived Normal
627	EBV	0.716463	Solid Tissue Normal
628	CIN	-0.702467	Blood Derived Normal
629	EBV	13.6915	Primary Tumor
630	CIN	-2.00248	Primary Tumor
631	MSI	0.0415662	Primary Tumor
632	CIN	-1.15276	Primary Tumor
633	EBV	11.7773	Primary Tumor
634	GS	-2.68348	Primary Tumor
635	EBV	-0.0122595	Blood Derived Normal
636	GS	0.469966	Blood Derived Normal
637	MSI	-2.50471	Primary Tumor
638	CIN	1.37864	Primary Tumor
639	MSI	1.89627	Primary Tumor
640	CIN	2.36883	Primary Tumor
641	CIN	-0.597928	Solid Tissue Normal
642	MSI	-2.06022	Primary Tumor
643	CIN	-1.75499	Primary Tumor
644	MSI	-1.18339	Primary Tumor
645	CIN	-1.61175	Primary Tumor
646	GS	-0.891913	Primary Tumor
647	CIN	-0.349788	Blood Derived Normal
648	GS	-3.99694	Primary Tumor
649	GS	-3.79143	Primary Tumor
650	CIN	0.987188	Primary Tumor
651	CIN	-2.71241	Primary Tumor
652	MSI	-0.333533	Primary Tumor
653	CIN	-0.444356	Primary Tumor
654	GS	0.143755	Primary Tumor
655	MSI	-2.60018	Solid Tissue Normal
656	CIN	1.57657	Primary Tumor
657	CIN	-1.73924	Primary Tumor
658	MSI	-0.995788	Primary Tumor
659	GS	0.0376819	Primary Tumor
660	CIN	-3.02046	Primary Tumor
661	GS	-1.76243	Blood Derived Normal
662	CIN	2.9438	Primary Tumor
663	CIN	-3.4233	Primary Tumor
664	CIN	-0.0593535	Primary Tumor
665	GS	-2.70397	Primary Tumor
666	GS	-4.18045	Solid Tissue Normal
667	MSI	2.50735	Primary Tumor
668	CIN	2.0191	Solid Tissue Normal
669	MSI	2.15652	Primary Tumor
670	CIN	1.05462	Primary Tumor
671	CIN	-1.50169	Blood Derived Normal
672	CIN	-1.37957	Blood Derived Normal
673	CIN	-2.55946	Primary Tumor
674	EBV	11.0867	Primary Tumor
675	CIN	0.183181	Primary Tumor
676	CIN	-1.85319	Primary Tumor
677	GS	-1.7875	Solid Tissue Normal
678	GS	-2.51924	Primary Tumor
679	MSI	0.235464	Blood Derived Normal
680	MSI	-0.743782	Primary Tumor
681	MSI	1.25792	Primary Tumor
682	CIN	5.18545	Primary Tumor
683	MSI	-3.14329	Primary Tumor
684	GS	-1.30029	Blood Derived Normal
685	CIN	-0.394259	Primary Tumor
686	CIN	-1.15215	Primary Tumor
687	CIN	-0.685559	Blood Derived Normal
688	MSI	-0.700046	Primary Tumor
689	MSI	-0.242595	Blood Derived Normal
690	CIN	1.07804	Primary Tumor
691	MSI	-2.44718	Solid Tissue Normal
692	MSI	4.68782	Primary Tumor
693	CIN	1.57655	Primary Tumor
694	CIN	4.10749	Primary Tumor
695	CIN	-3.05701	Primary Tumor
696	CIN	0.922281	Blood Derived Normal
697	MSI	-3.14329	Primary Tumor
698	GS	-4.17999	Solid Tissue Normal
699	CIN	-2.29167	Primary Tumor
700	EBV	10.187	Primary Tumor
701	CIN	4.73929	Primary Tumor
702	GS	-2.69084	Primary Tumor
703	MSI	-0.897103	Primary Tumor
704	GS	3.19739	Primary Tumor
705	GS	-2.19093	Primary Tumor
706	CIN	1.81813	Primary Tumor
707	CIN	0.027305	Primary Tumor
708	CIN	-0.907589	Primary Tumor
709	CIN	4.36014	Primary Tumor
710	CIN	-3.05925	Primary Tumor
711	MSI	-0.665119	Primary Tumor
712	CIN	-0.101026	Primary Tumor
713	CIN	-2.38554	Primary Tumor
714	CIN	-1.31078	Primary Tumor
715	EBV	12.4995	Primary Tumor
716	MSI	4.72777	Primary Tumor
717	CIN	1.81813	Primary Tumor
718	CIN	3.57384	Primary Tumor
719	CIN	0.740472	Primary Tumor
720	MSI	2.30418	Blood Derived Normal
721	GS	-0.977266	Primary Tumor
722	GS	-1.52488	Primary Tumor
723	CIN	-0.570503	Primary Tumor
724	CIN	-1.13445	Primary Tumor
725	CIN	-2.23895	Primary Tumor
726	CIN	2.38799	Primary Tumor
727	GS	4.01318	Primary Tumor
728	EBV	0.715753	Solid Tissue Normal
729	GS	1.88309	Primary Tumor
730	CIN	-1.50169	Blood Derived Normal
731	CIN	4.08767	Primary Tumor
732	CIN	-0.971283	Primary Tumor
733	CIN	6.12133	Primary Tumor
734	CIN	3.41359	Primary Tumor
735	CIN	2.05264	Primary Tumor
736	EBV	-2.31955	Blood Derived Normal
737	MSI	-1.48876	Blood Derived Normal
738	CIN	6.1159	Primary Tumor
739	CIN	0.661917	Primary Tumor
740	CIN	-0.784445	Primary Tumor
741	MSI	-1.30895	Primary Tumor
742	CIN	-1.28016	Primary Tumor
743	MSI	1.06249	Solid Tissue Normal
744	CIN	2.26208	Primary Tumor
745	MSI	-0.366858	Primary Tumor
746	CIN	-1.08646	Primary Tumor
747	GS	4.57742	Primary Tumor
748	CIN	-3.93984	Blood Derived Normal
749	GS	4.85237	Primary Tumor
750	CIN	-2.79772	Primary Tumor
751	EBV	13.3087	Primary Tumor
752	CIN	-2.50975	Primary Tumor
753	GS	-2.18827	Primary Tumor
754	MSI	4.86805	Primary Tumor
755	CIN	-2.52436	Primary Tumor
756	CIN	-0.670799	Primary Tumor
757	CIN	2.48033	Primary Tumor
758	CIN	-1.3915	Solid Tissue Normal
759	CIN	-0.23141	Primary Tumor
760	MSI	-0.694344	Primary Tumor
761	CIN	0.0979722	Blood Derived Normal
762	GS	0.0390367	Primary Tumor
763	GS	-2.03278	Primary Tumor
764	CIN	-2.53372	Primary Tumor
765	GS	-1.09197	Blood Derived Normal
766	CIN	-1.7458	Blood Derived Normal
767	CIN	-0.262021	Blood Derived Normal
768	CIN	4.36641	Primary Tumor
769	CIN	-2.00215	Primary Tumor
770	EBV	12.349	Primary Tumor
771	CIN	1.37864	Primary Tumor
772	CIN	-0.13543	Blood Derived Normal
773	GS	0.469966	Blood Derived Normal
774	CIN	1.51251	Primary Tumor
775	CIN	-0.628597	Primary Tumor
776	CIN	2.20384	Primary Tumor
777	CIN	5.68019	Primary Tumor
778	GS	0.789369	Primary Tumor
779	CIN	1.3084	Blood Derived Normal
780	MSI	4.72777	Primary Tumor
781	GS	-3.80964	Blood Derived Normal
782	CIN	-0.143931	Primary Tumor
783	GS	0.394757	Primary Tumor
784	GS	4.11558	Primary Tumor
785	CIN	5.45931	Primary Tumor
786	GS	-3.06276	Primary Tumor
787	CIN	0.537469	Primary Tumor
788	EBV	12.9452	Primary Tumor
789	MSI	1.8888	Primary Tumor
790	MSI	-0.930151	Blood Derived Normal
791	CIN	-1.47426	Solid Tissue Normal
792	CIN	-1.41233	Primary Tumor
793	MSI	-0.695504	Primary Tumor
794	EBV	12.9913	Primary Tumor
795	CIN	-2.22023	Primary Tumor
796	CIN	-1.26806	Primary Tumor
797	CIN	-1.22057	Primary Tumor
798	GS	-1.4002	Primary Tumor
799	CIN	-1.95402	Primary Tumor
800	MSI	-1.2041	Primary Tumor
801	CIN	0.222883	Primary Tumor
802	GS	-2.68348	Primary Tumor
803	CIN	-2.32617	Primary Tumor
804	CIN	-2.39313	Primary Tumor
805	CIN	-1.95402	Primary Tumor
806	MSI	4.07858	Primary Tumor
807	CIN	-0.51537	Blood Derived Normal
808	CIN	-1.08479	Primary Tumor
809	CIN	-1.91119	Primary Tumor
810	MSI	1.8888	Primary Tumor
811	MSI	3.14189	Primary Tumor
812	MSI	-0.599899	Primary Tumor
813	GS	-3.115	Solid Tissue Normal
814	MSI	-1.96319	Primary Tumor
815	CIN	3.65663	Primary Tumor
816	GS	-3.99747	Primary Tumor
817	MSI	-2.33611	Primary Tumor
818	CIN	2.55778	Solid Tissue Normal
819	CIN	-2.67915	Primary Tumor
820	GS	-3.19907	Primary Tumor
821	GS	-3.28702	Primary Tumor
822	MSI	-0.0747369	Primary Tumor
823	CIN	-0.23733	Primary Tumor
824	CIN	-0.91227	Primary Tumor
825	CIN	-2.5673	Primary Tumor
826	CIN	2.26208	Primary Tumor
827	GS	-2.3389	Primary Tumor
828	CIN	-2.23894	Primary Tumor
829	MSI	-2.17342	Solid Tissue Normal
830	MSI	1.11433	Blood Derived Normal
831	MSI	3.35057	Primary Tumor
832	MSI	-1.23918	Blood Derived Normal
833	GS	-2.74299	Primary Tumor
834	GS	1.96003	Primary Tumor
835	CIN	3.79569	Primary Tumor
836	MSI	6.1565	Primary Tumor
837	CIN	-3.06405	Primary Tumor
838	CIN	-1.28919	Blood Derived Normal
839	CIN	-1.00713	Primary Tumor
840	CIN	1.18812	Primary Tumor
841	CIN	-2.54925	Primary Tumor
842	CIN	-3.05702	Primary Tumor
843	CIN	-1.3834	Blood Derived Normal
844	MSI	3.94448	Primary Tumor
845	CIN	-0.204214	Primary Tumor
846	CIN	1.28668	Primary Tumor
847	CIN	-2.44804	Primary Tumor
848	CIN	1.28667	Primary Tumor
849	MSI	2.86794	Primary Tumor
850	CIN	-1.27239	Primary Tumor
851	GS	4.11302	Primary Tumor
852	GS	-2.65655	Primary Tumor
853	CIN	4.26845	Primary Tumor
854	MSI	-2.33615	Primary Tumor
855	MSI	3.40952	Primary Tumor
856	CIN	1.40466	Blood Derived Normal
857	CIN	-1.27797	Blood Derived Normal
858	CIN	4.85589	Primary Tumor
859	EBV	13.7987	Primary Tumor
860	EBV	11.3204	Primary Tumor
861	MSI	2.50566	Primary Tumor
862	CIN	-0.609612	Primary Tumor
863	CIN	-0.456121	Primary Tumor
864	CIN	0.626489	Blood Derived Normal
865	MSI	-3.00856	Solid Tissue Normal
866	CIN	3.78194	Primary Tumor
867	CIN	-1.07956	Primary Tumor
868	CIN	4.02026	Primary Tumor
869	CIN	-2.92348	Primary Tumor
870	CIN	0.0355037	Blood Derived Normal
871	CIN	-0.318457	Primary Tumor
872	CIN	-3.27124	Primary Tumor
873	EBV	15.3854	Primary Tumor
874	MSI	-0.548531	Primary Tumor
875	CIN	-1.54851	Primary Tumor
876	MSI	-0.0060235	Primary Tumor
877	MSI	1.22758	Primary Tumor
878	GS	-1.13772	Primary Tumor
879	CIN	-3.27123	Primary Tumor
880	MSI	-0.665119	Primary Tumor
881	CIN	2.41614	Primary Tumor
882	CIN	-2.25605	Primary Tumor
883	CIN	-0.995306	Solid Tissue Normal
884	EBV	-1.72172	Solid Tissue Normal
885	CIN	2.13661	Primary Tumor
886	MSI	2.50601	Primary Tumor
887	GS	-3.19907	Primary Tumor
888	CIN	-1.81299	Solid Tissue Normal
889	GS	3.25063	Primary Tumor
890	CIN	-3.68438	Blood Derived Normal
891	MSI	-2.19405	Primary Tumor
892	CIN	-1.00713	Primary Tumor
893	GS	-2.98283	Primary Tumor
894	CIN	-0.186855	Primary Tumor
895	EBV	13.3639	Primary Tumor
896	EBV	11.638	Primary Tumor
897	CIN	-0.980986	Primary Tumor
898	GS	-2.50941	Primary Tumor
899	CIN	-2.09384	Solid Tissue Normal
900	CIN	1.25224	Primary Tumor
901	CIN	1.38147	Solid Tissue Normal
902	CIN	-3.18577	Primary Tumor
903	CIN	5.22376	Primary Tumor
904	CIN	4.31921	Primary Tumor
905	GS	-3.13582	Primary Tumor
906	GS	1.25707	Solid Tissue Normal
907	CIN	3.14538	Primary Tumor
908	EBV	12.6504	Primary Tumor
909	CIN	-2.59541	Primary Tumor
910	CIN	-0.644305	Primary Tumor
911	CIN	-2.56485	Primary Tumor
912	GS	-3.13728	Primary Tumor
913	MSI	3.41994	Primary Tumor
914	GS	-1.70051	Primary Tumor
915	GS	3.44849	Primary Tumor
916	MSI	-2.83737	Primary Tumor
917	CIN	4.73865	Primary Tumor
918	CIN	-0.634782	Blood Derived Normal
