# Supplementary material for: RETRACTED ARTICLE: Microbiome analyses of blood and tissues suggest cancerdiagnostic approach
Source: Springer Nature journal article supplement (doi:10.1038/s41586-020-2095-1), 2020-03-11
Supplement: 41586_2020_2095_MOESM5_ESM.xlsx [file 41586_2020_2095_MOESM5_ESM.xlsx]

## Sheet: Fig 5a
	auroc_fullData	aupr_fullData	auroc_likelyContam	aupr_likelyContam	auroc_allPutative	aupr_allPutative	auroc_plateCenter	aupr_plateCenter	auroc_mostStringent	aupr_mostStringent
BLCA	0.90701	0.462058	0.874288	0.439152	0.879725	0.452686	0.860982	0.481826	0.871855	0.506449
LGG	0.996449	0.966094	0.998051	0.97042	0.996032	0.955121	0.975216	0.906902	0.995684	0.929314
BRCA	0.987607	0.874391	0.988378	0.794314	0.988496	0.825809	0.981143	0.744371	0.986599	0.881158
CESC	0.955921	0.772285	0.943884	0.764541	0.939016	0.744108	0.964418	0.751794	0.975571	0.604988
COAD	0.995315	0.939163	0.988971	0.860759	0.993003	0.927773	0.980254	0.913662	0.982626	0.651692
ESCA	0.998689	0.9696	0.97654	0.907952	0.998952	0.963464	0.992005	0.861211	0.99502	0.792946
GBM	0.97088	0.779943	0.986546	0.741388	0.980528	0.82728	0.950699	0.844764	0.997522	0.948796
HNSC	0.928756	0.745421	0.921927	0.700538	0.910022	0.677223	0.898164	0.656135	0.962025	0.746193
KIRP	0.995628	0.808956	0.984517	0.580543	0.973588	0.620451	0.985064	0.446123	0.99235	0.668751
LIHC	0.998586	0.888717	0.987273	0.738682	0.987475	0.781461	0.998182	0.908953	0.991313	0.567857
LUAD	0.981773	0.850104	0.989911	0.877677	0.973029	0.821785	0.975921	0.806622	0.933683	0.584408
OV	0.997866	0.948349	0.996382	0.90928	0.991002	0.815869	0.999165	0.978949	0.996011	0.947344
PRAD	0.994583	0.933363	0.987412	0.871222	0.984704	0.851419	0.990705	0.903863	0.995379	0.928611
READ	0.991426	0.846205	0.9911	0.91537	0.994573	0.910095	0.993054	0.876581	0.973301	0.554289
SARC	0.973588	0.8517	0.979417	0.888821	0.902368	0.901741	0.975956	0.906713	0.985246	0.793927
SKCM	0.911112	0.479957	0.89449	0.351213	0.889628	0.468206	0.88061	0.439431	0.980801	0.897257
STAD	0.934454	0.639423	0.92084	0.663236	0.947283	0.660219	0.917479	0.632917	0.962745	0.649539
THCA	0.96285	0.843694	0.935681	0.706617	0.933139	0.650921	0.953433	0.80934	0.971749	0.834167
UCEC	0.954093	0.843109	0.946062	0.796954	0.939661	0.827487	0.942596	0.797491	0.975253	0.756631
UVM	1	1	1	1	1	1	1	1	1	1

## Sheet: Fig 5b
	auroc_fullData	aupr_fullData	auroc_likelyContam	aupr_likelyContam	auroc_allPutative	aupr_allPutative	auroc_plateCenter	aupr_plateCenter	auroc_mostStringent	aupr_mostStringent
BLCA	0.797326	0.285264	0.874866	0.369124	0.806417	0.340498	0.902674	0.540638	0.881818	0.564651
BRCA	0.98025	0.957649	0.997351	0.985788	0.993015	0.964477	0.999277	0.994958	0.996869	0.981512
COAD	0.98699	0.889336	0.979302	0.866256	0.967475	0.825962	0.97398	0.843837	0.917209	0.37316
ESCA	0.995297	0.899116	0.997061	0.943072	0.972957	0.732642	0.987654	0.828638	0.998824	0.97882
HNSC	0.947991	0.594472	0.944444	0.512455	0.849882	0.473603	0.922577	0.620109	0.976359	0.745247
LIHC	0.986911	0.647073	0.937173	0.423747	0.977312	0.459921	0.975567	0.700185	0.989529	0.718654
LUAD	0.948588	0.814934	0.969492	0.840109	0.936723	0.835387	0.966667	0.86984	0.94322	0.731288
READ	0.968085	0.855443	0.977541	0.84355	0.985225	0.838146	0.97695	0.871858	0.954492	0.510149
SKCM	0.848052	0.455963	0.865974	0.574214	0.826494	0.517478	0.903896	0.677721	0.978442	0.916158
STAD	0.97605	0.859959	0.945594	0.82018	0.940568	0.801367	0.953873	0.799313	0.993791	0.930904
THCA	0.923302	0.762365	0.935223	0.737587	0.950517	0.811465	0.960189	0.850952	0.95614	0.814806
UVM	0.999127	0.974308	0.999127	0.974308	0.99651	0.92976	1	1	1	1

## Sheet: Fig 5c
	auroc_fullData	aupr_fullData	auroc_likelyContam	aupr_likelyContam	auroc_allPutative	aupr_allPutative	auroc_plateCenter	aupr_plateCenter	auroc_mostStringent	aupr_mostStringent
BRCA	0.884454	0.6132	0.981092	0.860244	0.981092	0.682723	0.987395	0.811847	0.988445	0.65142
CESC	0.900926	0.622632	0.884259	0.683461	0.87963	0.653708	0.865741	0.59093	0.986111	0.855518
COAD	0.975373	0.812654	0.966418	0.74768	0.969403	0.661614	0.983582	0.811062	0.942537	0.452841
GBM	0.933665	0.81925	0.989221	0.921859	0.91791	0.778256	0.914594	0.802906	0.999171	0.988293
HNSC	0.592284	0.194697	0.642336	0.317059	0.826903	0.364421	0.703858	0.236821	0.649635	0.374369
KIRP	0.990546	0.841774	0.992647	0.852275	0.988445	0.819719	0.968487	0.552151	0.996849	0.932857
OV	0.983333	0.789222	0.986111	0.840218	0.917593	0.500255	0.994444	0.927049	0.962963	0.751649
PRAD	0.988203	0.951529	0.958863	0.863739	0.974894	0.888109	0.993043	0.973914	0.99758	0.992442
READ	0.98913	0.896511	0.995169	0.858784	0.981884	0.849929	0.98913	0.870802	0.980676	0.629921
SARC	1	1	1	1	1	1	1	1	1	1
STAD	0.822732	0.458078	0.899896	0.473706	0.912409	0.648306	0.831074	0.562932	0.899896	0.572042
THCA	0.955556	0.790899	0.946253	0.65068	0.897158	0.455717	0.94677	0.591002	0.944703	0.813911

## Sheet: Fig 5d
	auroc_fullData	aupr_fullData	auroc_likelyContam	aupr_likelyContam	auroc_allPutative	aupr_allPutative	auroc_plateCenter	aupr_plateCenter	auroc_mostStringent	aupr_mostStringent
CESC	0.891026	0.721166	0.833333	0.57946	0.912393	0.610466	0.916667	0.630146	0.976496	0.802661
COAD	0.962171	0.688728	0.981908	0.838887	0.935855	0.738381	0.965461	0.739471	0.976974	0.722904
KIRP	0.934066	0.492304	0.923077	0.36752	0.886447	0.453568	0.913919	0.322737	1	1
PRAD	0.976644	0.916785	0.976644	0.871484	0.966263	0.857853	0.981834	0.917507	0.991349	0.971055
THCA	0.953704	0.728909	0.944444	0.790922	0.922454	0.700416	0.962963	0.791899	0.958333	0.81845
