# Supplementary material for: RETRACTED ARTICLE: Microbiome analyses of blood and tissues suggest cancerdiagnostic approach
Source: Springer Nature journal article supplement (doi:10.1038/s41586-020-2095-1), 2020-03-11
Supplement: 41586_2020_2095_MOESM9_ESM.xlsx [file 41586_2020_2095_MOESM9_ESM.xlsx]

## Sheet: EDF 3a
	AUROC_5050	AUPR_5050	AUROC_S1	AUPR_S1	AUROC_S2	AUPR_S2
ACC	0.9846	0.9063	0.9927	0.7186	0.9845	0.5721
BLCA	0.9113	0.4464	0.8335	0.2435	0.8194	0.2309
LGG	0.9833	0.8818	0.9222	0.6545	0.9076	0.6614
BRCA	0.9486	0.7899	0.9353	0.7458	0.8747	0.6241
CESC	0.9676	0.7769	0.9734	0.7127	0.9464	0.6955
CHOL	0.8529	0.1757	0.6863	0.0305	0.8594	0.08
COAD	0.9849	0.8597	0.9644	0.7291	0.958	0.7718
ESCA	0.9821	0.8827	0.9502	0.7489	0.9689	0.7827
GBM	0.9866	0.9448	0.9822	0.7377	0.9583	0.8071
HNSC	0.9801	0.8827	0.9763	0.7913	0.954	0.7937
KICH	0.9941	0.861	0.9884	0.7049	0.9355	0.5918
KIRC	0.9928	0.9542	0.9822	0.9258	0.9831	0.9116
KIRP	0.959	0.6666	0.9512	0.5548	0.8832	0.3835
LIHC	0.9928	0.9339	0.9916	0.9084	0.974	0.8714
LUAD	0.9495	0.666	0.8838	0.4334	0.8171	0.3313
LUSC	0.9605	0.7546	0.9265	0.5806	0.9126	0.5658
DLBC	0.8641	0.3447	0.8246	0.1313	0.8198	0.2357
MESO	0.9487	0.5473	0.8739	0.1741	0.8621	0.2055
OV	0.9953	0.9648	0.9846	0.9286	0.9843	0.9117
PAAD	0.9734	0.7497	0.9445	0.4068	0.9179	0.3161
PCPG	0.9612	0.6536	0.9337	0.4909	0.8923	0.4721
PRAD	0.9705	0.8596	0.9403	0.6824	0.8785	0.5533
READ	0.9955	0.9138	0.9773	0.778	0.9756	0.7239
SARC	0.9623	0.8308	0.9618	0.7057	0.9426	0.7078
SKCM	0.9462	0.592	0.8849	0.2552	0.8994	0.3281
STAD	0.9833	0.8726	0.971	0.8134	0.9723	0.8247
TGCT	0.9696	0.8398	0.9215	0.3177	0.9491	0.5004
THYM	0.9424	0.4616	0.8536	0.267	0.9622	0.2927
THCA	0.9583	0.7855	0.9007	0.5884	0.9042	0.6101
UCS	0.9837	0.7303	0.9811	0.5804	0.9469	0.3821
UCEC	0.9656	0.8477	0.9141	0.6943	0.9209	0.7096
UVM	0.9855	0.785	0.7895	0.2286	0.9363	0.4592

## Sheet: EDF 3b
	Original	Val
ACC	0.999969	0.9999
BLCA	0.925438	0.9159
LGG	0.989597	0.9864
BRCA	0.953934	0.9727
CESC	0.977747	0.9916
CHOL	0.823953	0.8568
COAD	0.989397	0.9928
ESCA	0.994793	0.9986
GBM	0.997152	0.9998
HNSC	0.982008	0.9947
KICH	0.998718	0.9994
KIRC	0.991566	0.9924
KIRP	0.977162	0.9447
LIHC	0.991301	0.9918
LUAD	0.9718	0.9685
LUSC	0.964708	0.9689
DLBC	0.87717	0.8362
MESO	0.958025	0.9557
OV	0.995648	0.9999
PAAD	0.982426	0.9922
PCPG	0.983152	0.9854
PRAD	0.980667	0.9851
READ	0.996716	0.9995
SARC	0.985298	0.9864
SKCM	0.959235	0.9832
STAD	0.987374	0.9939
TGCT	0.992683	0.9908
THYM	0.978188	0.9832
THCA	0.97212	0.9964
UCS	0.983489	0.9863
UCEC	0.97787	0.9761
UVM	0.989625	0.9854

## Sheet: EDF 3c
	Original	Val
ACC	0.994518	0.9889
BLCA	0.474854	0.473
LGG	0.90415	0.9264
BRCA	0.808679	0.8856
CESC	0.785353	0.8729
CHOL	0.459902	0.4499
COAD	0.890546	0.93
ESCA	0.907193	0.9193
GBM	0.965169	0.9938
HNSC	0.879462	0.9629
KICH	0.940555	0.9649
KIRC	0.952374	0.9596
KIRP	0.734855	0.7186
LIHC	0.940399	0.945
LUAD	0.737	0.7667
LUSC	0.76562	0.8193
DLBC	0.361838	0.5748
MESO	0.654108	0.7255
OV	0.966332	0.9982
PAAD	0.831206	0.8651
PCPG	0.733265	0.7946
PRAD	0.880002	0.9197
READ	0.930222	0.9775
SARC	0.880277	0.9018
SKCM	0.585531	0.7073
STAD	0.908962	0.9752
TGCT	0.911972	0.9166
THYM	0.610404	0.5827
THCA	0.813313	0.9645
UCS	0.802254	0.8245
UCEC	0.888403	0.8945
UVM	0.834692	0.8472

## Sheet: EDF 3d
	Original	Val
ACC	0.999969	NA
BLCA	0.925438	0.9037
LGG	0.989597	0.9968
BRCA	0.953934	0.9717
CESC	0.977747	0.9915
CHOL	0.823953	NA
COAD	0.989397	0.9899
ESCA	0.994793	0.9727
GBM	0.997152	0.9915
HNSC	0.982008	0.9772
KICH	0.998718	0.9998
KIRC	0.991566	0.9454
KIRP	0.977162	0.9938
LIHC	0.991301	0.9945
LUAD	0.9718	0.9738
LUSC	0.964708	0.9965
DLBC	0.87717	NA
MESO	0.958025	NA
OV	0.995648	0.9846
PAAD	0.982426	NA
PCPG	0.983152	NA
PRAD	0.980667	0.9926
READ	0.996716	0.9998
SARC	0.985298	0.9981
SKCM	0.959235	NA
STAD	0.987374	0.9772
TGCT	0.992683	NA
THYM	0.978188	NA
THCA	0.97212	0.9444
UCS	0.983489	NA
UCEC	0.97787	0.99
UVM	0.989625	1

## Sheet: EDF 3e
	Original	Val
ACC	0.994518	NA
BLCA	0.474854	0.7076
LGG	0.90415	0.9698
BRCA	0.808679	0.9041
CESC	0.785353	0.8796
CHOL	0.459902	NA
COAD	0.890546	0.8694
ESCA	0.907193	0.7106
GBM	0.965169	0.886
HNSC	0.879462	0.8538
KICH	0.940555	0.9911
KIRC	0.952374	0.8418
KIRP	0.734855	0.6446
LIHC	0.940399	0.8059
LUAD	0.737	0.9054
LUSC	0.76562	0.8743
DLBC	0.361838	NA
MESO	0.654108	NA
OV	0.966332	0.8486
PAAD	0.831206	NA
PCPG	0.733265	NA
PRAD	0.880002	0.9051
READ	0.930222	0.9943
SARC	0.880277	0.938
SKCM	0.585531	NA
STAD	0.908962	0.8424
TGCT	0.911972	NA
THYM	0.610404	NA
THCA	0.813313	0.7819
UCS	0.802254	NA
UCEC	0.888403	0.9205
UVM	0.834692	1

## Sheet: EDF 3f
	Original	Val
ACC	0.999969	0.9999
BLCA	0.925438	0.9048
LGG	0.989597	0.9872
BRCA	0.953934	0.973
CESC	0.977747	0.9929
CHOL	0.823953	0.8257
COAD	0.989397	0.9905
ESCA	0.994793	NA
GBM	0.997152	NA
HNSC	0.982008	0.9941
KICH	0.998718	0.9996
KIRC	0.991566	0.9927
KIRP	0.977162	0.9394
LIHC	0.991301	0.9932
LUAD	0.9718	0.9746
LUSC	0.964708	0.9662
DLBC	0.87717	0.8483
MESO	0.958025	0.9464
OV	0.995648	NA
PAAD	0.982426	0.9854
PCPG	0.983152	0.9919
PRAD	0.980667	0.9862
READ	0.996716	0.9977
SARC	0.985298	0.991
SKCM	0.959235	0.9809
STAD	0.987374	NA
TGCT	0.992683	0.9877
THYM	0.978188	0.9791
THCA	0.97212	0.9949
UCS	0.983489	0.9822
UCEC	0.97787	0.9776
UVM	0.989625	0.9835

## Sheet: EDF 3g
	Original	Val
ACC	0.994518	0.9854
BLCA	0.474854	0.5134
LGG	0.90415	0.9355
BRCA	0.808679	0.9119
CESC	0.785353	0.8971
CHOL	0.459902	0.2511
COAD	0.890546	0.9312
ESCA	0.907193	NA
GBM	0.965169	NA
HNSC	0.879462	0.9526
KICH	0.940555	0.9703
KIRC	0.952374	0.9657
KIRP	0.734855	0.7248
LIHC	0.940399	0.9555
LUAD	0.737	0.7992
LUSC	0.76562	0.8271
DLBC	0.361838	0.4789
MESO	0.654108	0.6569
OV	0.966332	NA
PAAD	0.831206	0.863
PCPG	0.733265	0.8342
PRAD	0.880002	0.9196
READ	0.930222	0.9366
SARC	0.880277	0.9141
SKCM	0.585531	0.7295
STAD	0.908962	NA
TGCT	0.911972	0.9115
THYM	0.610404	0.6272
THCA	0.813313	0.9601
UCS	0.802254	0.7938
UCEC	0.888403	0.9112
UVM	0.834692	0.825

## Sheet: EDF 3h
	Original	Val
ACC	0.999969	NA
BLCA	0.925438	0.9037
LGG	0.989597	0.9968
BRCA	0.953934	NA
CESC	0.977747	NA
CHOL	0.823953	NA
COAD	0.989397	0.9935
ESCA	0.994793	NA
GBM	0.997152	NA
HNSC	0.982008	0.9438
KICH	0.998718	NA
KIRC	0.991566	NA
KIRP	0.977162	NA
LIHC	0.991301	NA
LUAD	0.9718	0.98
LUSC	0.964708	NA
DLBC	0.87717	NA
MESO	0.958025	NA
OV	0.995648	NA
PAAD	0.982426	NA
PCPG	0.983152	NA
PRAD	0.980667	0.9928
READ	0.996716	0.9946
SARC	0.985298	NA
SKCM	0.959235	NA
STAD	0.987374	0.9849
TGCT	0.992683	NA
THYM	0.978188	NA
THCA	0.97212	0.9433
UCS	0.983489	NA
UCEC	0.97787	0.9766
UVM	0.989625	NA

## Sheet: EDF 3i
	Original	Val
ACC	0.994518	NA
BLCA	0.474854	0.7076
LGG	0.90415	0.9698
BRCA	0.808679	NA
CESC	0.785353	NA
CHOL	0.459902	NA
COAD	0.890546	0.9507
ESCA	0.907193	NA
GBM	0.965169	NA
HNSC	0.879462	0.8085
KICH	0.940555	NA
KIRC	0.952374	NA
KIRP	0.734855	NA
LIHC	0.940399	NA
LUAD	0.737	0.9325
LUSC	0.76562	NA
DLBC	0.361838	NA
MESO	0.654108	NA
OV	0.966332	NA
PAAD	0.831206	NA
PCPG	0.733265	NA
PRAD	0.880002	0.9594
READ	0.930222	0.9301
SARC	0.880277	NA
SKCM	0.585531	NA
STAD	0.908962	0.9179
TGCT	0.911972	NA
THYM	0.610404	NA
THCA	0.813313	0.8064
UCS	0.802254	NA
UCEC	0.888403	0.9137
UVM	0.834692	NA
