# Supplementary material for: RETRACTED ARTICLE: Microbiome analyses of blood and tissues suggest cancerdiagnostic approach
Source: Springer Nature journal article supplement (doi:10.1038/s41586-020-2095-1), 2020-03-11
Supplement: 41586_2020_2095_MOESM10_ESM.xlsx [file 41586_2020_2095_MOESM10_ESM.xlsx]

## Sheet: EDF 4a
	Disease.Type	variable	value
1	CESC	DNA.BWA.ROCAUC	0.934857
2	LUAD	DNA.BWA.ROCAUC	0.950355
3	OV	DNA.BWA.ROCAUC	0.967287
4	STAD	DNA.BWA.ROCAUC	0.970576
5	CESC	RNA.BWA.ROCAUC	0.980858
6	LUAD	RNA.BWA.ROCAUC	0.995788
7	OV	RNA.BWA.ROCAUC	0.995967
8	STAD	RNA.BWA.ROCAUC	0.99281
9	CESC	DNA.Full.ROCAUC	0.944
10	LUAD	DNA.Full.ROCAUC	0.940133
11	OV	DNA.Full.ROCAUC	0.969353
12	STAD	DNA.Full.ROCAUC	0.954897
13	CESC	RNA.Full.ROCAUC	0.987292
14	LUAD	RNA.Full.ROCAUC	0.992253
15	OV	RNA.Full.ROCAUC	0.993889
16	STAD	RNA.Full.ROCAUC	0.993741

## Sheet: EDF 4b
	Disease.Type	variable	value
1	CESC	BWA.DNA.PRAUC	0.822598
2	LUAD	BWA.DNA.PRAUC	0.929543
3	OV	BWA.DNA.PRAUC	0.821304
4	STAD	BWA.DNA.PRAUC	0.960028
5	CESC	RNA.BWA.PRAUC	0.945574
6	LUAD	RNA.BWA.PRAUC	0.986102
7	OV	RNA.BWA.PRAUC	0.994849
8	STAD	RNA.BWA.PRAUC	0.98753
9	CESC	DNA.Full.PRAUC	0.874837
10	LUAD	DNA.Full.PRAUC	0.922524
11	OV	DNA.Full.PRAUC	0.825608
12	STAD	DNA.Full.PRAUC	0.950405
13	CESC	RNA.Full.PRAUC	0.951575
14	LUAD	RNA.Full.PRAUC	0.972179
15	OV	RNA.Full.PRAUC	0.991905
16	STAD	RNA.Full.PRAUC	0.993741

## Sheet: EDF 4c
	Disease.Type	variable	value
1	LUAD	DNA.BWA.ROCAUC	0.707665
2	STAD	DNA.BWA.ROCAUC	0.791667
3	LUAD	RNA.BWA.ROCAUC	0.986482
4	STAD	RNA.BWA.ROCAUC	0.997732
5	LUAD	DNA.Full.ROCAUC	0.704991
6	STAD	DNA.Full.ROCAUC	0.826389
7	LUAD	RNA.Full.ROCAUC	0.983924
8	STAD	RNA.Full.ROCAUC	0.996372

## Sheet: EDF 4d
	Disease.Type	variable	value
1	LUAD	BWA.DNA.PRAUC	0.789255
2	STAD	BWA.DNA.PRAUC	0.932806
3	LUAD	RNA.BWA.PRAUC	0.99859
4	STAD	RNA.BWA.PRAUC	0.999773
5	LUAD	DNA.Full.PRAUC	0.819351
6	STAD	DNA.Full.PRAUC	0.946506
7	LUAD	RNA.Full.PRAUC	0.99834
8	STAD	RNA.Full.PRAUC	0.999641

## Sheet: EDF 4e
	Disease.Type	variable	value
1	LUAD	DNA.BWA.ROCAUC	NA
2	STAD	DNA.BWA.ROCAUC	0.597222
3	LUAD	RNA.BWA.ROCAUC	0.483146
4	STAD	RNA.BWA.ROCAUC	0.962069
5	LUAD	DNA.Full.ROCAUC	NA
6	STAD	DNA.Full.ROCAUC	0.583333
7	LUAD	RNA.Full.ROCAUC	0.521067
8	STAD	RNA.Full.ROCAUC	0.896552

## Sheet: EDF 4f
	Disease.Type	variable	value
1	LUAD	BWA.DNA.PRAUC	NA
2	STAD	BWA.DNA.PRAUC	0.674876
3	LUAD	RNA.BWA.PRAUC	0.0797184
4	STAD	RNA.BWA.PRAUC	0.953244
5	LUAD	DNA.Full.PRAUC	NA
6	STAD	DNA.Full.PRAUC	0.523991
7	LUAD	RNA.Full.PRAUC	0.0780614
8	STAD	RNA.Full.PRAUC	0.891788

## Sheet: EDF 4g
	Disease.Type	variable	value
1	CESC	DNA.BWA.ROCAUC	0.9701
2	LUAD	DNA.BWA.ROCAUC	0.952688
3	OV	DNA.BWA.ROCAUC	0.971839
4	STAD	DNA.BWA.ROCAUC	0.942402
5	CESC	DNA.Full.ROCAUC	0.953488
6	LUAD	DNA.Full.ROCAUC	0.928602
7	OV	DNA.Full.ROCAUC	0.995977
8	STAD	DNA.Full.ROCAUC	0.944036

## Sheet: EDF 4h
	Disease.Type	variable	value
1	CESC	BWA.DNA.PRAUC	0.93664
2	LUAD	BWA.DNA.PRAUC	0.931758
3	OV	BWA.DNA.PRAUC	0.885659
4	STAD	BWA.DNA.PRAUC	0.916529
5	CESC	DNA.Full.PRAUC	0.829072
6	LUAD	DNA.Full.PRAUC	0.916921
7	OV	DNA.Full.PRAUC	0.983651
8	STAD	DNA.Full.PRAUC	0.930228

## Sheet: EDF 4i
Kraken Taxa	BWA Filtered Taxa
k__Viruses.f__Phycodnaviridae.g__Prasinovirus	k__Bacteria.p__Chrysiogenetes.c__Chrysiogenetes.o__Chrysiogenales.f__Chrysiogenaceae.g__Desulfurispirillum
k__Viruses.o__Caudovirales.f__Siphoviridae.g__Sfi1unalikevirus	k__Bacteria.p__Actinobacteria.c__Actinobacteria.o__Micrococcales.f__Dermatophilaceae.g__Kineosphaera
k__Viruses.o__Herpesvirales.f__Herpesviridae.g__Simplexvirus	k__Archaea.p__Euryarchaeota.c__Thermoplasmata.o__Methanomassiliicoccales.f__Methanomassiliicoccaceae.g__Candidatus_Methanomethylophilus
k__Viruses.o__Caudovirales.f__Siphoviridae.g__C2likevirus	k__Bacteria.p__Proteobacteria.c__Gammaproteobacteria.o__Thiotrichales.f__Thiotrichaceae.g__Beggiatoa
k__Viruses.f__Poxviridae.g__Parapoxvirus	k__Bacteria.p__Bacteroidetes.c__Flavobacteriia.o__Flavobacteriales.f__Flavobacteriaceae.g__Robiginitalea
k__Viruses.f__Papillomaviridae.g__Dyolambdapapillomavirus	k__Bacteria.p__Proteobacteria.c__Betaproteobacteria.o__Neisseriales.f__Neisseriaceae.g__Amantichitinum
k__Viruses.o__Caudovirales.f__Siphoviridae.g__Bignuzlikevirus	k__Bacteria.p__Firmicutes.c__Clostridia.o__Clostridiales.f__Lachnospiraceae.g__Oribacterium
k__Viruses.o__Mononegavirales.f__Bornaviridae.g__Bornavirus	k__Bacteria.p__Firmicutes.c__Clostridia.o__Clostridiales.f__Lachnospiraceae.g__Pseudobutyrivibrio
k__Viruses.f__Bicaudaviridae.g__Bicaudavirus	k__Bacteria.p__Bacteroidetes.c__Flavobacteriia.o__Flavobacteriales.f__Flavobacteriaceae.g__Ulvibacter
k__Viruses.o__Picornavirales.f__Picornaviridae.g__Aquamavirus	k__Bacteria.p__Proteobacteria.c__Betaproteobacteria.o__Burkholderiales.f__Sutterellaceae.g__Sutterella
k__Viruses.o__Herpesvirales.f__Herpesviridae.g__Scutavirus	k__Bacteria.p__Actinobacteria.c__Actinobacteria.o__Micrococcales.f__Dermabacteraceae.g__Helcobacillus
k__Viruses.o__Herpesvirales.f__Herpesviridae.g__Mardivirus	k__Bacteria.p__Proteobacteria.c__Betaproteobacteria.o__Burkholderiales.f__Oxalobacteraceae.g__Pseudoduganella
k__Viruses.f__Baculoviridae.g__Deltabaculovirus	k__Bacteria.p__Bacteroidetes.c__Flavobacteriia.o__Flavobacteriales.f__Schleiferiaceae.g__Schleiferia
k__Viruses.f__Papillomaviridae.g__Taupapillomavirus	k__Bacteria.p__Bacteroidetes.c__Flavobacteriia.o__Flavobacteriales.f__Flavobacteriaceae.g__Altibacter
k__Viruses.o__Caudovirales.f__Myoviridae.g__I3likevirus	k__Bacteria.p__Proteobacteria.c__Gammaproteobacteria.o__Enterobacteriales.f__Enterobacteriaceae.g__Candidatus_Regiella
k__Viruses.f__Virgaviridae.g__Furovirus	k__Bacteria.p__Bacteroidetes.c__Bacteroidia.o__Bacteroidales.f__Porphyromonadaceae.g__Paludibacter
k__Viruses.o__Herpesvirales.f__Herpesviridae.g__Proboscivirus	k__Bacteria.p__Actinobacteria.c__Actinobacteria.o__Pseudonocardiales.f__Pseudonocardiaceae.g__Amycolatopsis
k__Viruses.o__Herpesvirales.f__Alloherpesviridae.g__Ictalurivirus	k__Archaea.p__Euryarchaeota.c__Methanomicrobia.o__Methanomicrobiales.f__Methanomicrobiaceae.g__Methanoculleus
k__Viruses.f__Inoviridae.g__Inovirus	k__Bacteria.p__Firmicutes.c__Negativicutes.o__Selenomonadales.f__Sporomusaceae.g__Acetonema
k__Viruses.f__Marseilleviridae.g__Marseillevirus	k__Bacteria.p__Cyanobacteria.o__Pleurocapsales.g__Chroococcidiopsis
k__Viruses.o__Nidovirales.f__Coronaviridae.g__Gammacoronavirus	k__Bacteria.p__Actinobacteria.c__Coriobacteriia.o__Eggerthellales.f__Eggerthellaceae.g__Denitrobacterium
k__Viruses.f__Anelloviridae.g__Thetatorquevirus	k__Bacteria.p__Proteobacteria.c__Gammaproteobacteria.o__Alteromonadales.f__Alteromonadaceae.g__Salinimonas
k__Viruses.f__Ascoviridae.g__Ascovirus	k__Bacteria.p__Firmicutes.c__Negativicutes.o__Selenomonadales.f__Sporomusaceae.g__Anaeroarcus
k__Viruses.o__Tymovirales.f__Tymoviridae.g__Maculavirus	k__Bacteria.p__Proteobacteria.c__Alphaproteobacteria.o__Rhodobacterales.f__Rhodobacteraceae.g__Ahrensia
k__Viruses.g__Negevirus	k__Bacteria.p__Proteobacteria.c__Gammaproteobacteria.o__Enterobacteriales.f__Enterobacteriaceae.g__Edwardsiella
k__Viruses.o__Caudovirales.f__Myoviridae.g__Spo1virus	k__Bacteria.p__Firmicutes.c__Clostridia.o__Thermoanaerobacterales.f__Thermoanaerobacterales_Family_III._Incertae_Sedis.g__Thermosediminibacter
k__Viruses.f__Circoviridae.g__Gyrovirus	k__Bacteria.p__Proteobacteria.c__Betaproteobacteria.o__Neisseriales.f__Neisseriaceae.g__Neisseria
k__Viruses.o__Mononegavirales.f__Rhabdoviridae.g__Novirhabdovirus	k__Bacteria.p__Proteobacteria.c__Alphaproteobacteria.o__Caulobacterales.f__Caulobacteraceae.g__Phenylobacterium
k__Viruses.o__Picornavirales.f__Picornaviridae.g__Sicinivirus	k__Bacteria.p__Proteobacteria.c__Alphaproteobacteria.o__Rhizobiales.g__Methyloceanibacter
k__Viruses.o__Mononegavirales.g__Pneumovirus	k__Bacteria.p__Proteobacteria.c__Gammaproteobacteria.o__Chromatiales.f__Halothiobacillaceae.g__Halothiobacillus
k__Viruses.o__Picornavirales.f__Picornaviridae.g__Dicipivirus	k__Bacteria.p__Firmicutes.c__Clostridia.o__Clostridiales.f__Eubacteriaceae.g__Acetobacterium
k__Viruses.f__Poxviridae.g__Molluscipoxvirus	k__Bacteria.p__Proteobacteria.c__Deltaproteobacteria.o__Desulfobacterales.f__Desulfobulbaceae.g__Desulfotalea
k__Viruses.o__Tymovirales.f__Tymoviridae.g__Tymovirus	k__Bacteria.p__Proteobacteria.c__Alphaproteobacteria.o__Rhodobacterales.f__Rhodobacteraceae.g__Nereida
k__Viruses.f__Arenaviridae.g__Mammarenavirus	k__Bacteria.p__Nitrospinae.c__Nitrospinia.o__Nitrospinales.f__Nitrospinaceae.g__Nitrospina
k__Viruses.f__Totiviridae.g__Victorivirus	k__Bacteria.p__Proteobacteria.c__Gammaproteobacteria.o__Alteromonadales.f__Alteromonadaceae.g__Catenovulum
k__Viruses.f__Flaviviridae.g__Hepacivirus	k__Bacteria.p__Actinobacteria.c__Actinobacteria.o__Actinomycetales.f__Actinomycetaceae.g__Varibaculum
k__Viruses.f__Poxviridae.g__Alphaentomopoxvirus	k__Bacteria.p__Proteobacteria.c__Betaproteobacteria.o__Neisseriales.f__Chromobacteriaceae.g__Andreprevotia
k__Viruses.f__Anelloviridae.g__Gammatorquevirus	k__Bacteria.p__Proteobacteria.c__Gammaproteobacteria.o__Enterobacteriales.f__Enterobacteriaceae.g__Escherichia
k__Viruses.o__Tymovirales.f__Gammaflexiviridae.g__Mycoflexivirus	k__Bacteria.p__Proteobacteria.c__Gammaproteobacteria.o__Oceanospirillales.f__Oceanospirillaceae.g__Amphritea
k__Viruses.g__Tenuivirus	k__Bacteria.p__Bacteroidetes.c__Flavobacteriia.o__Flavobacteriales.f__Flavobacteriaceae.g__Chryseobacterium
k__Viruses.f__Hepeviridae.g__Piscihepevirus	k__Bacteria.p__Verrucomicrobia.o__Methylacidiphilales.f__Methylacidiphilaceae.g__Methylacidiphilum
k__Viruses.f__Virgaviridae.g__Pomovirus	k__Bacteria.p__Proteobacteria.c__Deltaproteobacteria.o__Syntrophobacterales.f__Syntrophaceae.g__Desulfobacca
k__Viruses.f__Caulimoviridae.g__Badnavirus	k__Bacteria.p__Proteobacteria.c__Gammaproteobacteria.o__Methylococcales.f__Methylococcaceae.g__Methylocaldum
k__Viruses.f__Polydnaviridae.g__Ichnovirus	k__Bacteria.p__Bacteroidetes.c__Flavobacteriia.o__Flavobacteriales.f__Flavobacteriaceae.g__Jejuia
k__Viruses.o__Herpesvirales.f__Herpesviridae.g__Percavirus	k__Bacteria.p__Cyanobacteria.o__Nostocales.f__Nostocaceae.g__Cylindrospermopsis
k__Viruses.f__Papillomaviridae.g__Betapapillomavirus	k__Bacteria.p__Cyanobacteria.o__Chroococcales.g__Geminocystis
k__Viruses.f__Togaviridae.g__Alphavirus	k__Bacteria.p__Firmicutes.c__Bacilli.o__Bacillales.f__Paenibacillaceae.g__Paenibacillus
k__Viruses.o__Tymovirales.f__Betaflexiviridae.g__Trichovirus	k__Bacteria.p__Actinobacteria.c__Coriobacteriia.o__Coriobacteriales.f__Coriobacteriaceae.g__Senegalimassilia
k__Viruses.o__Caudovirales.f__Podoviridae.g__Bcep22likevirus	k__Bacteria.p__Actinobacteria.c__Actinobacteria.o__Micrococcales.f__Microbacteriaceae.g__Plantibacter
k__Viruses.o__Tymovirales.f__Alphaflexiviridae.g__Sclerodarnavirus	k__Bacteria.p__Proteobacteria.c__Gammaproteobacteria.o__Xanthomonadales.f__Rhodanobacteraceae.g__Oleiagrimonas
k__Viruses.f__Phycodnaviridae.g__Coccolithovirus	k__Archaea.p__Euryarchaeota.c__Methanococci.o__Methanococcales.f__Methanococcaceae.g__Methanococcus
k__Viruses.o__Ligamenvirales.f__Lipothrixviridae.g__Deltalipothrixvirus	k__Bacteria.p__Proteobacteria.c__Deltaproteobacteria.o__Desulfobacterales.f__Desulfobulbaceae.g__Desulfurivibrio
k__Viruses.f__Papillomaviridae.g__Omikronpapillomavirus	k__Bacteria.p__Actinobacteria.c__Actinobacteria.o__Actinomycetales.f__Actinomycetaceae.g__Mobiluncus
k__Viruses.f__Retroviridae.g__Alpharetrovirus	k__Bacteria.p__Actinobacteria.c__Coriobacteriia.o__Coriobacteriales.f__Coriobacteriaceae.g__Enorma
k__Viruses.o__Caudovirales.f__Siphoviridae.g__Jerseylikevirus	k__Bacteria.p__Proteobacteria.c__Gammaproteobacteria.o__Enterobacteriales.f__Enterobacteriaceae.g__Obesumbacterium
k__Viruses.f__Poxviridae.g__Capripoxvirus	k__Bacteria.p__Cyanobacteria.o__Pleurocapsales.g__Aliterella
k__Viruses.f__Poxviridae.g__Cervidpoxvirus	k__Bacteria.p__Firmicutes.c__Bacilli.o__Bacillales.f__Bacillaceae.g__Psychrobacillus
k__Viruses.g__Higrevirus	k__Bacteria.p__Proteobacteria.c__Betaproteobacteria.o__Neisseriales.f__Neisseriaceae.g__Eikenella
k__Viruses.f__Potyviridae.g__Bymovirus	k__Bacteria.p__Proteobacteria.c__Deltaproteobacteria.o__Myxococcales.f__Polyangiaceae.g__Chondromyces
k__Viruses.o__Caudovirales.f__Podoviridae.g__Phikmvlikevirus	k__Bacteria.p__Actinobacteria.c__Actinobacteria.o__Propionibacteriales.f__Nocardioidaceae.g__Pimelobacter
k__Viruses.o__Picornavirales.f__Picornaviridae.g__Tremovirus	k__Bacteria.p__Proteobacteria.c__Gammaproteobacteria.o__Legionellales.f__Coxiellaceae.g__Rickettsiella
k__Viruses.o__Picornavirales.f__Secoviridae.g__Torradovirus	k__Bacteria.p__Acidobacteria.c__Acidobacteriia.o__Acidobacteriales.f__Acidobacteriaceae.g__Acidobacterium
k__Viruses.o__Caudovirales.f__Siphoviridae.g__T5likevirus	k__Bacteria.p__Bacteroidetes.c__Cytophagia.o__Cytophagales.f__Flammeovirgaceae.g__Roseivirga
k__Viruses.o__Nidovirales.f__Coronaviridae.g__Bafinivirus	k__Bacteria.p__Firmicutes.c__Bacilli.o__Bacillales.f__Planococcaceae.g__Bhargavaea
k__Viruses.f__Baculoviridae.g__Alphabaculovirus	k__Bacteria.p__Proteobacteria.c__Gammaproteobacteria.o__Chromatiales.f__Ectothiorhodospiraceae.g__Spiribacter
k__Viruses.f__Papillomaviridae.g__Mupapillomavirus	k__Bacteria.p__Actinobacteria.c__Actinobacteria.o__Corynebacteriales.g__Lawsonella
k__Viruses.o__Caudovirales.f__Siphoviridae.g__Lambdalikevirus	k__Bacteria.p__Proteobacteria.c__Epsilonproteobacteria.o__Campylobacterales.f__Campylobacteraceae.g__Sulfurospirillum
k__Viruses.o__Caudovirales.f__Myoviridae.g__Felixounalikevirus	k__Bacteria.p__Actinobacteria.c__Actinobacteria.o__Micrococcales.f__Microbacteriaceae.g__Frondihabitans
k__Viruses.f__Papillomaviridae.g__Phipapillomavirus	k__Bacteria.p__Proteobacteria.c__Gammaproteobacteria.g__Ignatzschineria
k__Viruses.f__Papillomaviridae.g__Omegapapillomavirus	k__Bacteria.p__Proteobacteria.c__Gammaproteobacteria.o__Enterobacteriales.f__Enterobacteriaceae.g__Brenneria
k__Viruses.o__Nidovirales.f__Coronaviridae.g__Betacoronavirus	k__Bacteria.p__Proteobacteria.c__Gammaproteobacteria.o__Pasteurellales.f__Pasteurellaceae.g__Haemophilus
k__Viruses.f__Luteoviridae.g__Enamovirus	k__Bacteria.p__Proteobacteria.c__Gammaproteobacteria.o__Chromatiales.f__Chromatiaceae.g__Thioflavicoccus
k__Viruses.f__Phycodnaviridae.g__Chlorovirus	k__Bacteria.p__Proteobacteria.c__Gammaproteobacteria.o__Alteromonadales.f__Alteromonadaceae.g__Paraglaciecola
k__Viruses.f__Hypoviridae.g__Hypovirus	k__Bacteria.p__Proteobacteria.c__Gammaproteobacteria.o__Alteromonadales.f__Alteromonadaceae.g__Aliagarivorans
k__Viruses.f__Anelloviridae.g__Alphatorquevirus	k__Bacteria.p__Chloroflexi.c__Thermomicrobia.g__Thermorudis
k__Viruses.o__Picornavirales.f__Dicistroviridae.g__Aparavirus	k__Bacteria.p__Firmicutes.c__Bacilli.o__Lactobacillales.f__Streptococcaceae.g__Lactococcus
k__Viruses.g__Pithovirus	k__Bacteria.p__Firmicutes.c__Clostridia.o__Clostridiales.f__Clostridiaceae.g__Butyricicoccus
k__Viruses.f__Phycodnaviridae.g__Phaeovirus	k__Bacteria.p__Proteobacteria.c__Deltaproteobacteria.o__Desulfobacterales.f__Desulfobacteraceae.g__Desulfococcus
k__Viruses.o__Picornavirales.f__Picornaviridae.g__Hepatovirus	k__Archaea.p__Thaumarchaeota.o__Nitrosopumilales.f__Nitrosopumilaceae.g__Candidatus_Nitrosoarchaeum
k__Viruses.f__Virgaviridae.g__Tobamovirus	k__Bacteria.p__Firmicutes.c__Bacilli.o__Bacillales.f__Bacillaceae.g__Salsuginibacillus
k__Viruses.o__Caudovirales.f__Siphoviridae.g__Barnyardlikevirus	k__Bacteria.p__Proteobacteria.c__Alphaproteobacteria.o__Rhodobacterales.f__Rhodobacteraceae.g__Marinovum
k__Viruses.f__Baculoviridae.g__Betabaculovirus	k__Archaea.p__Euryarchaeota.c__Halobacteria.o__Natrialbales.f__Natrialbaceae.g__Natronolimnobius
k__Viruses.f__Arenaviridae.g__Arenavirus	k__Bacteria.p__Actinobacteria.c__Actinobacteria.o__Propionibacteriales.f__Propionibacteriaceae.g__Propionimicrobium
k__Viruses.o__Picornavirales.f__Marnaviridae.g__Marnavirus	k__Bacteria.p__Cyanobacteria.o__Chroococcales.g__Rubidibacter
k__Viruses.o__Caudovirales.f__Myoviridae.g__P100virus	k__Bacteria.p__Proteobacteria.c__Alphaproteobacteria.g__Polymorphum
k__Viruses.o__Caudovirales.f__Myoviridae.g__Spounalikevirus	k__Bacteria.p__Firmicutes.c__Bacilli.o__Bacillales.f__Bacillales_Family_X._Incertae_Sedis.g__Thermicanus
k__Viruses.f__Partitiviridae.g__Betapartitivirus	k__Bacteria.p__Bacteroidetes.c__Bacteroidia.o__Bacteroidales.f__Porphyromonadaceae.g__Dysgonomonas
k__Viruses.f__Reoviridae.g__Cypovirus	k__Bacteria.p__Bacteroidetes.c__Cytophagia.o__Cytophagales.f__Cyclobacteriaceae.g__Mariniradius
k__Viruses.o__Tymovirales.f__Betaflexiviridae.g__Carlavirus	k__Bacteria.p__Proteobacteria.c__Gammaproteobacteria.o__Enterobacteriales.f__Enterobacteriaceae.g__Yersinia
k__Viruses.o__Nidovirales.f__Coronaviridae.g__Alphacoronavirus	k__Bacteria.p__Planctomycetes.c__Planctomycetia.o__Planctomycetales.f__Planctomycetaceae.g__Rhodopirellula
k__Viruses.o__Mononegavirales.f__Paramyxoviridae.g__Avulavirus	k__Bacteria.p__Proteobacteria.c__Betaproteobacteria.o__Rhodocyclales.f__Rhodocyclaceae.g__Dechloromonas
k__Viruses.o__Herpesvirales.f__Herpesviridae.g__Iltovirus	k__Bacteria.p__Actinobacteria.c__Actinobacteria.o__Micrococcales.f__Ruaniaceae.g__Ruania
k__Viruses.f__Bromoviridae.g__Bromovirus	k__Bacteria.p__Proteobacteria.c__Betaproteobacteria.o__Neisseriales.f__Neisseriaceae.g__Alysiella
k__Viruses.f__Bunyaviridae.g__Phlebovirus	k__Bacteria.p__Actinobacteria.c__Actinobacteria.o__Propionibacteriales.f__Nocardioidaceae.g__Kribbella
k__Viruses.f__Closteroviridae.g__Closterovirus	k__Bacteria.p__Proteobacteria.c__Betaproteobacteria.o__Burkholderiales.f__Alcaligenaceae.g__Advenella
k__Viruses.o__Caudovirales.f__Myoviridae.g__Viunalikevirus	k__Bacteria.p__Acidobacteria.c__Solibacteres.o__Solibacterales.f__Solibacteraceae.g__Candidatus_Solibacter
k__Viruses.o__Caudovirales.f__Siphoviridae.g__Phicbklikevirus	k__Bacteria.p__Actinobacteria.c__Actinobacteria.o__Pseudonocardiales.f__Pseudonocardiaceae.g__Saccharopolyspora
k__Viruses.f__Fuselloviridae.g__Alphafusellovirus	k__Bacteria.p__Proteobacteria.c__Deltaproteobacteria.o__Myxococcales.f__Sandaracinaceae.g__Sandaracinus
k__Viruses.f__Bunyaviridae.g__Orthobunyavirus	k__Archaea.p__Euryarchaeota.c__Thermoplasmata.o__Thermoplasmatales.f__Picrophilaceae.g__Picrophilus
k__Viruses.o__Picornavirales.f__Picornaviridae.g__Sapelovirus	k__Bacteria.p__Proteobacteria.c__Gammaproteobacteria.o__Legionellales.f__Coxiellaceae.g__Coxiella
k__Viruses.f__Bunyaviridae.g__Tospovirus	k__Bacteria.p__Proteobacteria.c__Alphaproteobacteria.o__Rhodobacterales.f__Rhodobacteraceae.g__Sulfitobacter
k__Viruses.f__Mimiviridae.g__Cafeteriavirus	k__Bacteria.p__Chloroflexi.c__Chloroflexia.o__Chloroflexales.f__Chloroflexaceae.g__Chloroflexus
k__Viruses.f__Poxviridae.g__Suipoxvirus	k__Bacteria.p__Bacteroidetes.c__Cytophagia.o__Cytophagales.f__Cyclobacteriaceae.g__Nitritalea
k__Viruses.f__Potyviridae.g__Potyvirus	k__Bacteria.p__Firmicutes.c__Bacilli.o__Lactobacillales.f__Carnobacteriaceae.g__Alloiococcus
k__Viruses.o__Herpesvirales.f__Herpesviridae.g__Muromegalovirus	k__Archaea.p__Crenarchaeota.c__Thermoprotei.o__Thermoproteales.f__Thermoproteaceae.g__Vulcanisaeta
k__Viruses.o__Picornavirales.f__Picornaviridae.g__Salivirus	k__Bacteria.p__Firmicutes.c__Clostridia.o__Clostridiales.f__Clostridiales_Family_XIII._Incertae_Sedis.g__Casaltella
k__Viruses.o__Caudovirales.f__Podoviridae.g__N4likevirus	k__Bacteria.p__Proteobacteria.c__Alphaproteobacteria.o__Rhodospirillales.f__Rhodospirillaceae.g__Thalassobaculum
k__Viruses.f__Retroviridae.g__Lentivirus	k__Bacteria.p__Proteobacteria.c__Acidithiobacillia.o__Acidithiobacillales.f__Thermithiobacillaceae.g__Thermithiobacillus
k__Viruses.o__Picornavirales.f__Secoviridae.g__Fabavirus	k__Bacteria.p__Proteobacteria.c__Deltaproteobacteria.o__Myxococcales.f__Labilitrichaceae.g__Labilithrix
k__Viruses.f__Polydnaviridae.g__Bracovirus	k__Bacteria.p__Proteobacteria.c__Deltaproteobacteria.o__Myxococcales.f__Cystobacteraceae.g__Cystobacter
k__Viruses.o__Herpesvirales.f__Herpesviridae.g__Rhadinovirus	k__Bacteria.p__Actinobacteria.c__Actinobacteria.o__Micrococcales.f__Intrasporangiaceae.g__Phycicoccus
k__Viruses.f__Luteoviridae.g__Polerovirus	k__Bacteria.p__Firmicutes.c__Bacilli.o__Lactobacillales.f__Lactobacillaceae.g__Sharpea
k__Viruses.f__Flaviviridae.g__Pestivirus	k__Bacteria.p__Firmicutes.c__Bacilli.o__Bacillales.f__Bacillaceae.g__Salinibacillus
k__Viruses.f__Poxviridae.g__Betaentomopoxvirus	k__Bacteria.p__Chloroflexi.c__Dehalococcoidia.g__Dehalogenimonas
k__Viruses.f__Geminiviridae.g__Begomovirus	k__Bacteria.p__Bacteroidetes.c__Flavobacteriia.o__Flavobacteriales.f__Flavobacteriaceae.g__Salegentibacter
k__Viruses.o__Herpesvirales.f__Alloherpesviridae.g__Cyprinivirus	k__Bacteria.p__Firmicutes.c__Clostridia.o__Clostridiales.f__Peptococcaceae.g__Desulfosporosinus
k__Viruses.o__Mononegavirales.f__Nyamiviridae.g__Nyavirus	k__Bacteria.p__Bacteroidetes.c__Bacteroidia.o__Bacteroidales.f__Lentimicrobiaceae.g__Lentimicrobium
k__Viruses.f__Potyviridae.g__Rymovirus	k__Bacteria.p__Proteobacteria.c__Alphaproteobacteria.o__Rhodobacterales.f__Rhodobacteraceae.g__Puniceibacterium
k__Viruses.f__Retroviridae.g__Betaretrovirus	k__Bacteria.p__Proteobacteria.c__Alphaproteobacteria.o__Rhodobacterales.f__Rhodobacteraceae.g__Aestuariivita
k__Viruses.f__Microviridae.g__Microvirus	k__Bacteria.p__Proteobacteria.c__Betaproteobacteria.g__Candidatus_Profftella
k__Viruses.o__Caudovirales.f__Siphoviridae.g__Andromedalikevirus	k__Bacteria.p__Firmicutes.c__Clostridia.o__Clostridiales.f__Ruminococcaceae.g__Candidatus_Soleaferrea
k__Viruses.f__Iridoviridae.g__Chloriridovirus	k__Bacteria.p__Thermotogae.c__Thermotogae.o__Thermotogales.f__Fervidobacteriaceae.g__Fervidobacterium
k__Viruses.o__Picornavirales.f__Picornaviridae.g__Aphthovirus	k__Bacteria.p__Proteobacteria.c__Gammaproteobacteria.o__Xanthomonadales.f__Rhodanobacteraceae.g__Dokdonella
k__Viruses.f__Iridoviridae.g__Lymphocystivirus	k__Bacteria.p__Proteobacteria.c__Gammaproteobacteria.o__Pasteurellales.f__Pasteurellaceae.g__Chelonobacter
k__Viruses.o__Tymovirales.f__Alphaflexiviridae.g__Lolavirus	k__Bacteria.p__Proteobacteria.c__Gammaproteobacteria.o__Legionellales.f__Legionellaceae.g__Tatlockia
k__Viruses.o__Caudovirales.f__Myoviridae.g__Silviavirus	k__Bacteria.p__Proteobacteria.c__Gammaproteobacteria.o__Aeromonadales.f__Aeromonadaceae.g__Oceanimonas
k__Viruses.f__Caliciviridae.g__Vesivirus	k__Bacteria.p__Proteobacteria.c__Alphaproteobacteria.o__Rhodobacterales.f__Rhodobacteraceae.g__Pseudorhodobacter
k__Viruses.f__Poxviridae.g__Avipoxvirus	k__Bacteria.p__Proteobacteria.c__Alphaproteobacteria.o__Rhizobiales.f__Methylocystaceae.g__Methylosinus
k__Viruses.g__Cilevirus	k__Bacteria.p__Cyanobacteria.o__Chroococcales.g__Neosynechococcus
k__Viruses.o__Mononegavirales.f__Paramyxoviridae.g__Rubulavirus	k__Bacteria.p__Bacteroidetes.c__Flavobacteriia.o__Flavobacteriales.f__Flavobacteriaceae.g__Galbibacter
k__Viruses.f__Chrysoviridae.g__Chrysovirus	k__Bacteria.p__Proteobacteria.c__Alphaproteobacteria.o__Rhodospirillales.f__Acetobacteraceae.g__Acetobacter
k__Viruses.o__Caudovirales.f__Myoviridae.g__Twortlikevirus	k__Bacteria.p__Proteobacteria.c__Gammaproteobacteria.o__Pasteurellales.f__Pasteurellaceae.g__Aggregatibacter
k__Viruses.g__Emaravirus	k__Bacteria.p__Proteobacteria.c__Deltaproteobacteria.o__Syntrophobacterales.f__Syntrophorhabdaceae.g__Syntrophorhabdus
k__Viruses.f__Astroviridae.g__Avastrovirus	k__Bacteria.p__Actinobacteria.c__Acidimicrobiia.o__Acidimicrobiales.f__Acidimicrobiaceae.g__Ferrimicrobium
k__Viruses.o__Picornavirales.f__Secoviridae.g__Cheravirus	k__Bacteria.p__Proteobacteria.c__Epsilonproteobacteria.g__Nitratiruptor
k__Viruses.o__Ligamenvirales.f__Rudiviridae.g__Rudivirus	k__Bacteria.p__Proteobacteria.c__Gammaproteobacteria.o__Legionellales.f__Legionellaceae.g__Fluoribacter
k__Viruses.o__Herpesvirales.f__Herpesviridae.g__Varicellovirus	k__Archaea.p__Euryarchaeota.c__Halobacteria.o__Halobacteriales.f__Halobacteriaceae.g__Halorhabdus
k__Viruses.f__Polyomaviridae.g__Polyomavirus	k__Bacteria.p__Bacteroidetes.c__Flavobacteriia.o__Flavobacteriales.g__Candidatus_Sulcia
k__Viruses.o__Herpesvirales.f__Alloherpesviridae.g__Batrachovirus	k__Archaea.p__Crenarchaeota.c__Thermoprotei.o__Desulfurococcales.f__Desulfurococcaceae.g__Staphylothermus
k__Viruses.o__Picornavirales.f__Picornaviridae.g__Enterovirus	k__Bacteria.p__Chloroflexi.c__Dehalococcoidia.o__Dehalococcoidales.f__Dehalococcoidaceae.g__Dehalococcoides
k__Viruses.o__Picornavirales.f__Secoviridae.g__Waikavirus	k__Bacteria.p__Aquificae.c__Aquificae.o__Aquificales.f__Aquificaceae.g__Hydrogenivirga
k__Viruses.o__Caudovirales.f__Myoviridae.g__T4likevirus	k__Bacteria.p__Proteobacteria.c__Gammaproteobacteria.o__Pseudomonadales.f__Moraxellaceae.g__Acinetobacter
k__Viruses.f__Poxviridae.g__Yatapoxvirus	k__Bacteria.p__Proteobacteria.c__Betaproteobacteria.o__Burkholderiales.f__Burkholderiaceae.g__Paraburkholderia
k__Viruses.f__Adenoviridae.g__Mastadenovirus	k__Bacteria.p__Aquificae.c__Aquificae.o__Aquificales.g__Thermosulfidibacter
k__Viruses.o__Herpesvirales.f__Herpesviridae.g__Cytomegalovirus	k__Bacteria.p__Firmicutes.c__Bacilli.o__Bacillales.f__Bacillaceae.g__Lentibacillus
k__Viruses.o__Picornavirales.f__Picornaviridae.g__Kobuvirus	k__Bacteria.p__Aquificae.c__Aquificae.o__Aquificales.f__Aquificaceae.g__Thermocrinis
k__Viruses.o__Caudovirales.f__Podoviridae.g__T7likevirus	k__Bacteria.p__Proteobacteria.c__Betaproteobacteria.o__Neisseriales.f__Neisseriaceae.g__Conchiformibius
k__Viruses.o__Herpesvirales.f__Herpesviridae.g__Roseolovirus	k__Bacteria.p__Firmicutes.c__Clostridia.o__Clostridiales.f__Eubacteriaceae.g__Pseudoramibacter
k__Viruses.f__Adenoviridae.g__Aviadenovirus	k__Bacteria.p__Proteobacteria.c__Alphaproteobacteria.o__Rhizobiales.f__Methylocystaceae.g__Pleomorphomonas
k__Viruses.o__Ligamenvirales.f__Lipothrixviridae.g__Betalipothrixvirus	k__Bacteria.p__Chloroflexi.c__Anaerolineae.o__Anaerolineales.f__Anaerolineaceae.g__Longilinea
k__Viruses.f__Iridoviridae.g__Ranavirus	k__Archaea.p__Euryarchaeota.c__Halobacteria.o__Halobacteriales.f__Halobacteriaceae.g__Halococcus
k__Viruses.f__Closteroviridae.g__Ampelovirus	k__Bacteria.p__Thermodesulfobacteria.c__Thermodesulfobacteria.o__Thermodesulfobacteriales.f__Thermodesulfobacteriaceae.g__Caldimicrobium
k__Viruses.o__Caudovirales.f__Siphoviridae.g__Phietalikevirus	k__Bacteria.p__Actinobacteria.c__Actinobacteria.o__Propionibacteriales.f__Nocardioidaceae.g__Marmoricola
k__Viruses.o__Caudovirales.f__Siphoviridae.g__Pgonelikevirus	k__Bacteria.p__Firmicutes.c__Clostridia.o__Clostridiales.f__Ruminococcaceae.g__Subdoligranulum
k__Viruses.f__Orthomyxoviridae.g__Isavirus	k__Bacteria.p__Proteobacteria.c__Alphaproteobacteria.o__Kordiimonadales.f__Kordiimonadaceae.g__Kordiimonas
k__Viruses.f__Poxviridae.g__Orthopoxvirus	k__Bacteria.p__Bacteroidetes.c__Flavobacteriia.o__Flavobacteriales.f__Blattabacteriaceae.g__Blattabacterium
k__Viruses.f__Papillomaviridae.g__Gammapapillomavirus	k__Bacteria.p__Firmicutes.c__Clostridia.o__Clostridiales.f__Ruminococcaceae.g__Anaerotruncus
k__Viruses.f__Phycodnaviridae.g__Prymnesiovirus	k__Bacteria.p__Proteobacteria.c__Alphaproteobacteria.o__Rickettsiales.f__Candidatus_Paracaedibacteraceae.g__Candidatus_Odyssella
k__Viruses.f__Bunyaviridae.g__Hantavirus	k__Bacteria.p__Proteobacteria.c__Gammaproteobacteria.o__Thiotrichales.f__Thiotrichaceae.g__Leucothrix
k__Viruses.o__Picornavirales.f__Picornaviridae.g__Senecavirus	k__Bacteria.p__Proteobacteria.c__Betaproteobacteria.o__Neisseriales.f__Chromobacteriaceae.g__Leeia
k__Viruses.o__Caudovirales.f__Siphoviridae.g__L5likevirus	k__Bacteria.p__Firmicutes.c__Clostridia.o__Thermoanaerobacterales.f__Thermoanaerobacteraceae.g__Moorella
k__Viruses.o__Picornavirales.f__Dicistroviridae.g__Cripavirus	k__Bacteria.p__Proteobacteria.c__Gammaproteobacteria.o__Xanthomonadales.f__Rhodanobacteraceae.g__Mizugakiibacter
k__Viruses.o__Caudovirales.f__Siphoviridae.g__Tunalikevirus	k__Bacteria.p__Proteobacteria.c__Betaproteobacteria.o__Burkholderiales.f__Oxalobacteraceae.g__Herbaspirillum
k__Viruses.f__Hytrosaviridae.g__Muscavirus	k__Bacteria.p__Firmicutes.c__Bacilli.o__Bacillales.f__Staphylococcaceae.g__Salinicoccus
k__Viruses.o__Herpesvirales.f__Herpesviridae.g__Macavirus	k__Bacteria.p__Proteobacteria.c__Alphaproteobacteria.o__Kiloniellales.f__Kiloniellaceae.g__Kiloniella
k__Viruses.f__Bromoviridae.g__Oleavirus	k__Bacteria.p__Tenericutes.c__Mollicutes.o__Entomoplasmatales.f__Entomoplasmataceae.g__Entomoplasma
k__Viruses.f__Closteroviridae.g__Crinivirus	k__Bacteria.p__Proteobacteria.c__Gammaproteobacteria.o__Orbales.f__Orbaceae.g__Gilliamella
k__Viruses.f__Papillomaviridae.g__Lambdapapillomavirus	k__Bacteria.p__Proteobacteria.c__Gammaproteobacteria.o__Pasteurellales.f__Pasteurellaceae.g__Necropsobacter
k__Viruses.f__Papillomaviridae.g__Alphapapillomavirus	k__Bacteria.p__Proteobacteria.c__Betaproteobacteria.o__Burkholderiales.f__Comamonadaceae.g__Verminephrobacter
k__Viruses.f__Partitiviridae.g__Alphapartitivirus	k__Bacteria.p__Proteobacteria.c__Deltaproteobacteria.o__Desulfobacterales.f__Desulfobacteraceae.g__Desulfatibacillum
k__Viruses.f__Mimiviridae.g__Mimivirus	k__Bacteria.p__Firmicutes.c__Negativicutes.o__Selenomonadales.f__Sporomusaceae.g__Pelosinus
k__Viruses.o__Herpesvirales.f__Malacoherpesviridae.g__Ostreavirus	k__Bacteria.p__Proteobacteria.c__Gammaproteobacteria.o__Alteromonadales.f__Colwelliaceae.g__Colwellia
k__Viruses.o__Mononegavirales.g__Metapneumovirus	k__Bacteria.p__Proteobacteria.c__Betaproteobacteria.o__Burkholderiales.f__Oxalobacteraceae.g__Duganella
k__Viruses.o__Tymovirales.f__Alphaflexiviridae.g__Potexvirus	k__Bacteria.p__Actinobacteria.c__Actinobacteria.o__Actinomycetales.f__Actinomycetaceae.g__Actinobaculum
k__Viruses.o__Caudovirales.f__Siphoviridae.g__Sfi21dtunalikevirus	k__Bacteria.p__Proteobacteria.c__Alphaproteobacteria.o__Rhodospirillales.f__Acetobacteraceae.g__Tanticharoenia
k__Viruses.f__Retroviridae.g__Gammaretrovirus	k__Bacteria.p__Proteobacteria.c__Alphaproteobacteria.o__Rhodobacterales.f__Rhodobacteraceae.g__Paenirhodobacter
k__Viruses.f__Circoviridae.g__Circovirus	k__Bacteria.p__Firmicutes.c__Clostridia.o__Clostridiales.f__Peptococcaceae.g__Dehalobacter
k__Viruses.o__Tymovirales.f__Betaflexiviridae.g__Foveavirus	k__Bacteria.p__Actinobacteria.c__Actinobacteria.o__Micrococcales.f__Micrococcaceae.g__Acaricomes
k__Viruses.o__Picornavirales.f__Secoviridae.g__Nepovirus	k__Bacteria.p__Actinobacteria.c__Actinobacteria.o__Micrococcales.f__Microbacteriaceae.g__Candidatus_Aquiluna
k__Viruses.o__Picornavirales.f__Iflaviridae.g__Iflavirus	k__Bacteria.p__Proteobacteria.c__Alphaproteobacteria.o__Rhodobacterales.f__Rhodobacteraceae.g__Rubellimicrobium
k__Viruses.f__Iridoviridae.g__Iridovirus	k__Bacteria.p__Proteobacteria.c__Gammaproteobacteria.o__Enterobacteriales.f__Enterobacteriaceae.g__Cronobacter
k__Viruses.f__Flaviviridae.g__Flavivirus	k__Bacteria.p__Actinobacteria.c__Actinobacteria.o__Micrococcales.f__Dermatophilaceae.g__Dermatophilus
k__Viruses.f__Astroviridae.g__Mamastrovirus	k__Bacteria.p__Bacteroidetes.c__Flavobacteriia.o__Flavobacteriales.f__Flavobacteriaceae.g__Flavobacterium
k__Viruses.f__Virgaviridae.g__Pecluvirus	k__Bacteria.p__Actinobacteria.c__Actinobacteria.o__Geodermatophilales.f__Geodermatophilaceae.g__Modestobacter
k__Viruses.o__Nidovirales.f__Roniviridae.g__Okavirus	k__Bacteria.p__Bacteroidetes.c__Flavobacteriia.o__Flavobacteriales.f__Flavobacteriaceae.g__Salinimicrobium
k__Viruses.g__Bacilladnavirus	k__Bacteria.p__Proteobacteria.c__Betaproteobacteria.o__Burkholderiales.f__Comamonadaceae.g__Simplicispira
k__Viruses.f__Bromoviridae.g__Cucumovirus	k__Bacteria.p__Proteobacteria.c__Alphaproteobacteria.o__Rhizobiales.f__Hyphomicrobiaceae.g__Cucumibacter
k__Viruses.o__Herpesvirales.f__Herpesviridae.g__Lymphocryptovirus	k__Bacteria.p__Bacteroidetes.c__Sphingobacteriia.o__Sphingobacteriales.f__Sphingobacteriaceae.g__Sphingobacterium
k__Viruses.f__Nimaviridae.g__Whispovirus	k__Bacteria.p__Proteobacteria.c__Deltaproteobacteria.o__Desulfobacterales.f__Desulfobacteraceae.g__Desulforegula
k__Viruses.f__Hytrosaviridae.g__Glossinavirus	k__Bacteria.p__Proteobacteria.c__Gammaproteobacteria.o__Pseudomonadales.f__Ventosimonadaceae.g__Ventosimonas
k__Viruses.f__Virgaviridae.g__Hordeivirus	k__Bacteria.p__Deferribacteres.c__Deferribacteres.o__Deferribacterales.f__Deferribacteraceae.g__Denitrovibrio
k__Viruses.o__Caudovirales.f__Siphoviridae.g__Skunalikevirus	k__Bacteria.p__Proteobacteria.c__Betaproteobacteria.o__Burkholderiales.f__Comamonadaceae.g__Curvibacter
k__Viruses.o__Caudovirales.f__Myoviridae.g__Cp220likevirus	k__Bacteria.p__Cyanobacteria.o__Chroococcales.g__Halothece
k__Viruses.o__Tymovirales.f__Tymoviridae.g__Marafivirus	k__Bacteria.p__Bacteroidetes.c__Flavobacteriia.o__Flavobacteriales.f__Flavobacteriaceae.g__Imtechella
k__Viruses.o__Caudovirales.f__Myoviridae.g__Phikzlikevirus	k__Bacteria.p__Bacteroidetes.c__Bacteroidia.o__Bacteroidales.f__Porphyromonadaceae.g__Porphyromonas
k__Viruses.o__Caudovirales.f__Myoviridae.g__Cp8unalikevirus	k__Bacteria.p__Firmicutes.c__Bacilli.o__Bacillales.f__Bacillaceae.g__Virgibacillus
k__Viruses.o__Caudovirales.f__Myoviridae.g__PhiCD119likevirus	k__Bacteria.p__Firmicutes.c__Bacilli.o__Bacillales.f__Planococcaceae.g__Sporosarcina
k__Viruses.f__Papillomaviridae.g__Pipapillomavirus	k__Bacteria.p__Proteobacteria.c__Betaproteobacteria.o__Burkholderiales.f__Comamonadaceae.g__Delftia
k__Viruses.o__Picornavirales.f__Picornaviridae.g__Megrivirus	k__Bacteria.p__Aquificae.c__Aquificae.o__Desulfurobacteriales.f__Desulfurobacteriaceae.g__Thermovibrio
k__Viruses.o__Caudovirales.f__Myoviridae.g__Kayvirus	k__Bacteria.p__Acidobacteria.c__Holophagae.o__Holophagales.f__Holophagaceae.g__Holophaga
k__Viruses.o__Caudovirales.f__Siphoviridae.g__C5likevirus	k__Bacteria.p__Gemmatimonadetes.c__Gemmatimonadetes.o__Gemmatimonadales.f__Gemmatimonadaceae.g__Gemmatirosa
k__Viruses.f__Endornaviridae.g__Endornavirus	k__Bacteria.p__Deferribacteres.c__Deferribacteres.o__Deferribacterales.f__Deferribacteraceae.g__Mucispirillum
k__Viruses.f__Reoviridae.g__Orbivirus	k__Bacteria.p__Proteobacteria.c__Gammaproteobacteria.o__Vibrionales.f__Vibrionaceae.g__Aliivibrio
k__Viruses.f__Adenoviridae.g__Atadenovirus	k__Bacteria.p__Firmicutes.c__Clostridia.o__Clostridiales.f__Peptococcaceae.g__Candidatus_Desulforudis
k__Viruses.f__Orthomyxoviridae.g__Influenzavirus_C	k__Bacteria.p__Firmicutes.c__Erysipelotrichia.o__Erysipelotrichales.f__Erysipelotrichaceae.g__Erysipelothrix
k__Viruses.o__Tymovirales.f__Alphaflexiviridae.g__Botrexvirus	k__Bacteria.p__Bacteroidetes.c__Chitinophagia.o__Chitinophagales.f__Saprospiraceae.g__Haliscomenobacter
k__Viruses.f__Poxviridae.g__Leporipoxvirus	k__Bacteria.p__Bacteroidetes.c__Chitinophagia.o__Chitinophagales.f__Chitinophagaceae.g__Sediminibacterium
k__Viruses.o__Caudovirales.f__Podoviridae.g__Phi29likevirus	k__Bacteria.p__Chlamydiae.c__Chlamydiia.o__Chlamydiales.f__Waddliaceae.g__Waddlia
k__Viruses.f__Parvoviridae.g__Erythroparvovirus	k__Bacteria.p__Proteobacteria.c__Betaproteobacteria.o__Neisseriales.f__Chromobacteriaceae.g__Laribacter
k__Viruses.o__Caudovirales.f__Myoviridae.g__Schizot4likevirus	k__Bacteria.p__Proteobacteria.c__Gammaproteobacteria.o__Enterobacteriales.f__Enterobacteriaceae.g__Siccibacter
k__Viruses.f__Baculoviridae.g__Gammabaculovirus	k__Bacteria.p__Proteobacteria.c__Gammaproteobacteria.o__Pasteurellales.f__Pasteurellaceae.g__Basfia
k__Viruses.o__Caudovirales.f__Siphoviridae.g__Yualikevirus	k__Bacteria.p__Proteobacteria.c__Alphaproteobacteria.o__Sphingomonadales.f__Sphingomonadaceae.g__Sphingorhabdus
k__Viruses.o__Picornavirales.f__Picornaviridae.g__Cosavirus	k__Bacteria.p__Planctomycetes.c__Planctomycetia.o__Planctomycetales.f__Isosphaeraceae.g__Isosphaera
k__Viruses.f__Ampullaviridae.g__Ampullavirus	k__Bacteria.p__Actinobacteria.c__Actinobacteria.o__Micrococcales.f__Micrococcaceae.g__Glutamicibacter
k__Viruses.f__Tectiviridae.g__Tectivirus	k__Bacteria.p__Actinobacteria.c__Actinobacteria.o__Micrococcales.f__Microbacteriaceae.g__Gulosibacter
k__Viruses.f__Caulimoviridae.g__Cavemovirus	k__Bacteria.p__Proteobacteria.c__Betaproteobacteria.o__Nitrosomonadales.f__Nitrosomonadaceae.g__Nitrosospira
k__Viruses.f__Anelloviridae.g__Epsilontorquevirus	k__Bacteria.p__Proteobacteria.c__Gammaproteobacteria.o__Oceanospirillales.f__Oceanospirillaceae.g__Oleispira
k__Viruses.f__Papillomaviridae.g__Deltapapillomavirus	k__Archaea.p__Euryarchaeota.c__Methanomicrobia.o__Methanosarcinales.f__Methanosarcinaceae.g__Methanococcoides
k__Viruses.f__Parvoviridae.g__Iteradensovirus	k__Bacteria.p__Firmicutes.c__Negativicutes.o__Selenomonadales.f__Sporomusaceae.g__Sporomusa
k__Viruses.o__Mononegavirales.f__Rhabdoviridae.g__Ephemerovirus	k__Bacteria.p__Cyanobacteria.o__Oscillatoriales.g__Planktothricoides
k__Viruses.f__Poxviridae.g__Crocodylidpoxvirus	k__Bacteria.p__Cyanobacteria.o__Oscillatoriales.g__Arthrospira
k__Viruses.f__Anelloviridae.g__Betatorquevirus	k__Bacteria.p__Verrucomicrobia.c__Spartobacteria.g__Candidatus_Xiphinematobacter
k__Viruses.f__Turriviridae.g__Alphaturrivirus	k__Bacteria.p__Proteobacteria.c__Deltaproteobacteria.o__Desulfovibrionales.f__Desulfovibrionaceae.g__Lawsonia
k__Viruses.f__Caulimoviridae.g__Caulimovirus	k__Bacteria.p__Proteobacteria.c__Deltaproteobacteria.o__Desulfuromonadales.f__Geobacteraceae.g__Geopsychrobacter
k__Viruses.o__Caudovirales.f__Siphoviridae.g__P23likevirus	k__Bacteria.p__Proteobacteria.c__Betaproteobacteria.o__Burkholderiales.f__Comamonadaceae.g__Ramlibacter
k__Viruses.o__Caudovirales.f__Myoviridae.g__Pbunalikevirus	k__Bacteria.p__Proteobacteria.c__Gammaproteobacteria.o__Xanthomonadales.f__Rhodanobacteraceae.g__Rudaea
k__Viruses.f__Globuloviridae.g__Globulovirus	k__Bacteria.p__Firmicutes.c__Clostridia.o__Thermoanaerobacterales.f__Thermoanaerobacteraceae.g__Caldanaerobacter
k__Viruses.f__Reoviridae.g__Fijivirus	k__Bacteria.p__Actinobacteria.c__Actinobacteria.o__Kineosporiales.f__Kineosporiaceae.g__Kineococcus
k__Viruses.f__Reoviridae.g__Phytoreovirus	k__Bacteria.p__Bacteroidetes.c__Flavobacteriia.o__Flavobacteriales.f__Flavobacteriaceae.g__Sediminicola
k__Viruses.f__Benyviridae.g__Benyvirus	k__Bacteria.p__Firmicutes.c__Erysipelotrichia.o__Erysipelotrichales.f__Erysipelotrichaceae.g__Candidatus_Stoquefichus
k__Viruses.f__Parvoviridae.g__Protoparvovirus	k__Bacteria.p__Proteobacteria.c__Deltaproteobacteria.o__Desulfovibrionales.f__Desulfohalobiaceae.g__Desulfovermiculus
k__Viruses.f__Asfarviridae.g__Asfivirus	k__Bacteria.p__Proteobacteria.c__Alphaproteobacteria.o__Rhodobacterales.f__Hyphomonadaceae.g__Hyphomonas
k__Viruses.f__Luteoviridae.g__Luteovirus	k__Bacteria.p__Chloroflexi.c__Anaerolineae.o__Anaerolineales.f__Anaerolineaceae.g__Ornatilinea
k__Viruses.o__Mononegavirales.f__Paramyxoviridae.g__Respirovirus	k__Archaea.p__Euryarchaeota.c__Thermococci.o__Thermococcales.f__Thermococcaceae.g__Pyrococcus
k__Viruses.o__Mononegavirales.f__Filoviridae.g__Marburgvirus	k__Bacteria.p__Proteobacteria.c__Alphaproteobacteria.o__Rhodobacterales.f__Rhodobacteraceae.g__Roseivivax
k__Viruses.f__Fuselloviridae.g__Betafusellovirus	k__Bacteria.p__Proteobacteria.c__Epsilonproteobacteria.o__Campylobacterales.f__Campylobacteraceae.g__Campylobacter
k__Viruses.o__Picornavirales.f__Picornaviridae.g__Pasivirus	k__Bacteria.p__Actinobacteria.c__Actinobacteria.o__Streptomycetales.f__Streptomycetaceae.g__Streptomyces
k__Viruses.f__Bromoviridae.g__Alfamovirus	k__Bacteria.p__Actinobacteria.c__Actinobacteria.o__Pseudonocardiales.f__Pseudonocardiaceae.g__Actinoalloteichus
k__Viruses.o__Caudovirales.f__Podoviridae.g__Sp6likevirus	k__Bacteria.p__Bacteroidetes.c__Cytophagia.o__Cytophagales.f__Cyclobacteriaceae.g__Algoriphagus
k__Viruses.o__Nidovirales.f__Coronaviridae.g__Deltacoronavirus	k__Archaea.p__Crenarchaeota.c__Thermoprotei.o__Acidilobales.f__Acidilobaceae.g__Acidilobus
k__Viruses.f__Inoviridae.g__Plectrovirus	k__Bacteria.p__Proteobacteria.c__Gammaproteobacteria.o__Xanthomonadales.f__Xanthomonadaceae.g__Lysobacter
k__Viruses.o__Picornavirales.f__Secoviridae.g__Sadwavirus	k__Bacteria.p__Proteobacteria.c__Gammaproteobacteria.o__Enterobacteriales.f__Enterobacteriaceae.g__Mangrovibacter
k__Viruses.o__Mononegavirales.f__Paramyxoviridae.g__Morbillivirus	k__Bacteria.p__Bacteroidetes.c__Chitinophagia.o__Chitinophagales.f__Chitinophagaceae.g__Segetibacter
k__Viruses.o__Mononegavirales.g__Orthopneumovirus	k__Bacteria.p__Proteobacteria.c__Deltaproteobacteria.o__Desulfovibrionales.f__Desulfovibrionaceae.g__Desulfovibrio
k__Viruses.o__Caudovirales.f__Siphoviridae.g__3alikevirus	k__Bacteria.p__Proteobacteria.c__Alphaproteobacteria.o__Rhodobacterales.f__Rhodobacteraceae.g__Confluentimicrobium
k__Viruses.o__Tymovirales.f__Alphaflexiviridae.g__Mandarivirus	k__Bacteria.p__Proteobacteria.c__Gammaproteobacteria.o__Alteromonadales.f__Alteromonadaceae.g__Glaciecola
k__Viruses.f__Togaviridae.g__Rubivirus	k__Bacteria.p__Firmicutes.c__Bacilli.o__Lactobacillales.f__Enterococcaceae.g__Catellicoccus
k__Viruses.o__Tymovirales.f__Betaflexiviridae.g__Vitivirus	k__Bacteria.p__Firmicutes.c__Clostridia.o__Clostridiales.f__Symbiobacteriaceae.g__Symbiobacterium
k__Viruses.o__Caudovirales.f__Siphoviridae.g__Xp10likevirus	k__Bacteria.p__Chloroflexi.c__Chloroflexia.o__Chloroflexales.f__Oscillochloridaceae.g__Oscillochloris
k__Viruses.f__Sphaerolipoviridae.g__Alphasphaerolipovirus	k__Bacteria.p__Firmicutes.c__Bacilli.o__Lactobacillales.f__Aerococcaceae.g__Facklamia
k__Viruses.o__Caudovirales.f__Myoviridae.g__Hpunalikevirus	k__Bacteria.p__Synergistetes.c__Synergistia.o__Synergistales.f__Synergistaceae.g__Anaerobaculum
k__Viruses.f__Parvoviridae.g__Brevidensovirus	k__Archaea.p__Euryarchaeota.c__Halobacteria.o__Haloferacales.f__Haloferacaceae.g__Haloferax
k__Viruses.f__Papillomaviridae.g__Dyoetapapillomavirus	k__Bacteria.p__Proteobacteria.c__Gammaproteobacteria.o__Pasteurellales.f__Pasteurellaceae.g__Mannheimia
k__Viruses.o__Caudovirales.f__Siphoviridae.g__Sap6likevirus	k__Bacteria.p__Bacteroidetes.c__Cytophagia.o__Cytophagales.f__Cytophagaceae.g__Fibrisoma
k__Viruses.o__Caudovirales.f__Siphoviridae.g__Che9clikevirus	k__Bacteria.p__Actinobacteria.c__Actinobacteria.o__Streptosporangiales.f__Streptosporangiaceae.g__Microbispora
k__Viruses.f__Caulimoviridae.g__Rosadnavirus	k__Bacteria.p__Firmicutes.c__Clostridia.o__Clostridiales.f__Clostridiaceae.g__Oxobacter
k__Viruses.f__Caulimoviridae.g__Solendovirus	k__Bacteria.p__Proteobacteria.c__Gammaproteobacteria.o__Enterobacteriales.f__Enterobacteriaceae.g__Candidatus_Ishikawaella
k__Viruses.f__Sphaerolipoviridae.g__Gammasphaerolipovirus	k__Bacteria.p__Proteobacteria.c__Gammaproteobacteria.o__Chromatiales.f__Ectothiorhodospiraceae.g__Alkalilimnicola
k__Viruses.o__Caudovirales.f__Siphoviridae.g__Phijlunalikevirus	k__Bacteria.p__Actinobacteria.c__Actinobacteria.o__Corynebacteriales.f__Tsukamurellaceae.g__Tsukamurella
k__Viruses.o__Caudovirales.f__Myoviridae.g__P2likevirus	k__Bacteria.p__Firmicutes.c__Clostridia.o__Natranaerobiales.f__Natranaerobiaceae.g__Natranaerobius
k__Viruses.f__Flaviviridae.g__Pegivirus	k__Bacteria.p__Cyanobacteria.o__Stigonematales.g__Chlorogloeopsis
k__Viruses.f__Adenoviridae.g__Siadenovirus	k__Bacteria.p__Proteobacteria.c__Alphaproteobacteria.o__Rhodobacterales.f__Rhodobacteraceae.g__Pseudophaeobacter
k__Viruses.f__Parvoviridae.g__Copiparvovirus	k__Bacteria.p__Firmicutes.c__Negativicutes.o__Selenomonadales.f__Selenomonadaceae.g__Megamonas
k__Viruses.f__Anelloviridae.g__Iotatorquevirus	k__Bacteria.p__Cyanobacteria.o__Chroococcales.g__Cyanobium
k__Viruses.o__Caudovirales.f__Myoviridae.g__Hapunalikevirus	k__Bacteria.p__Proteobacteria.c__Gammaproteobacteria.o__Pseudomonadales.f__Pseudomonadaceae.g__Pseudomonas
k__Viruses.o__Caudovirales.f__Siphoviridae.g__N15likevirus	k__Bacteria.p__Proteobacteria.c__Gammaproteobacteria.o__Vibrionales.f__Vibrionaceae.g__Grimontia
k__Viruses.f__Retroviridae.g__Epsilonretrovirus	k__Bacteria.p__Proteobacteria.c__Alphaproteobacteria.o__Rhizobiales.f__Brucellaceae.g__Ochrobactrum
k__Viruses.o__Mononegavirales.f__Paramyxoviridae.g__Henipavirus	k__Bacteria.p__Actinobacteria.c__Actinobacteria.o__Micrococcales.f__Dermabacteraceae.g__Dermabacter
k__Viruses.f__Reoviridae.g__Rotavirus	k__Bacteria.p__Firmicutes.c__Bacilli.o__Bacillales.f__Bacillaceae.g__Amphibacillus
k__Viruses.o__Ligamenvirales.f__Lipothrixviridae.g__Gammalipothrixvirus	k__Bacteria.p__Fibrobacteres.c__Chitinispirillia.o__Chitinispirillales.f__Chitinispirillaceae.g__Chitinispirillum
k__Viruses.f__Reoviridae.g__Mimoreovirus	k__Bacteria.p__Proteobacteria.c__Betaproteobacteria.o__Burkholderiales.f__Comamonadaceae.g__Candidatus_Symbiobacter
k__Viruses.o__Mononegavirales.f__Rhabdoviridae.g__Vesiculovirus	k__Bacteria.p__Actinobacteria.c__Actinobacteria.o__Micromonosporales.f__Micromonosporaceae.g__Longispora
k__Viruses.o__Mononegavirales.f__Rhabdoviridae.g__Lyssavirus	k__Bacteria.p__Bacteroidetes.c__Sphingobacteriia.o__Sphingobacteriales.f__Sphingobacteriaceae.g__Solitalea
k__Viruses.f__Hepadnaviridae.g__Orthohepadnavirus	k__Archaea.p__Euryarchaeota.c__Methanomicrobia.o__Methanomicrobiales.f__Methanomicrobiaceae.g__Methanomicrobium
k__Viruses.f__Parvoviridae.g__Dependoparvovirus	k__Bacteria.p__Firmicutes.c__Bacilli.o__Bacillales.g__Acidibacillus
k__Viruses.o__Tymovirales.f__Alphaflexiviridae.g__Allexivirus	k__Bacteria.p__Cyanobacteria.o__Nostocales.f__Nostocaceae.g__Anabaena
k__Viruses.o__Picornavirales.f__Picornaviridae.g__Parechovirus	k__Archaea.p__Euryarchaeota.c__Halobacteria.o__Natrialbales.f__Natrialbaceae.g__Natronorubrum
k__Viruses.o__Nidovirales.f__Mesoniviridae.g__Alphamesonivirus	k__Bacteria.p__Actinobacteria.c__Actinobacteria.o__Geodermatophilales.f__Geodermatophilaceae.g__Geodermatophilus
k__Viruses.o__Caudovirales.f__Siphoviridae.g__Corndoglikevirus	k__Bacteria.p__Proteobacteria.c__Deltaproteobacteria.o__Syntrophobacterales.f__Syntrophaceae.g__Syntrophus
k__Viruses.f__Tombusviridae.g__Carmovirus	k__Bacteria.p__Chloroflexi.c__Anaerolineae.o__Anaerolineales.f__Anaerolineaceae.g__Anaerolinea
k__Viruses.f__Parvoviridae.g__Ambidensovirus	k__Bacteria.p__Cyanobacteria.o__Oscillatoriales.g__Spirulina
k__Viruses.g__Sobemovirus	k__Bacteria.p__Proteobacteria.c__Deltaproteobacteria.o__Desulfarculales.f__Desulfarculaceae.g__Desulfocarbo
k__Viruses.o__Picornavirales.f__Secoviridae.g__Comovirus	k__Bacteria.p__Proteobacteria.c__Alphaproteobacteria.o__Rhodospirillales.f__Rhodospirillaceae.g__Magnetospirillum
k__Viruses.o__Mononegavirales.f__Filoviridae.g__Ebolavirus	k__Bacteria.p__Actinobacteria.c__Actinobacteria.o__Actinomycetales.f__Actinomycetaceae.g__Arcanobacterium
k__Viruses.f__Geminiviridae.g__Mastrevirus	k__Bacteria.p__Ignavibacteriae.c__Ignavibacteria.o__Ignavibacteriales.f__Melioribacteraceae.g__Melioribacter
k__Viruses.g__Polemovirus	k__Bacteria.p__Proteobacteria.c__Gammaproteobacteria.o__Thiotrichales.f__Piscirickettsiaceae.g__Thiomicrospira
k__Viruses.o__Picornavirales.f__Picornaviridae.g__Passerivirus	k__Bacteria.p__Actinobacteria.c__Actinobacteria.o__Micromonosporales.f__Micromonosporaceae.g__Salinispora
k__Viruses.f__Leviviridae.g__Levivirus	k__Bacteria.p__Proteobacteria.c__Betaproteobacteria.o__Gallionellales.f__Gallionellaceae.g__Ferriphaselus
k__Viruses.o__Picornavirales.f__Picornaviridae.g__Rosavirus	k__Bacteria.p__Proteobacteria.c__Gammaproteobacteria.o__Cellvibrionales.f__Cellvibrionaceae.g__Teredinibacter
k__Viruses.f__Retroviridae.g__Deltaretrovirus	k__Bacteria.p__Proteobacteria.c__Gammaproteobacteria.o__Pseudomonadales.f__Moraxellaceae.g__Alkanindiges
k__Viruses.o__Mononegavirales.f__Paramyxoviridae.g__Aquaparamyxovirus	k__Bacteria.p__Proteobacteria.c__Alphaproteobacteria.o__Rhodobacterales.f__Rhodobacteraceae.g__Gemmobacter
k__Viruses.f__Parvoviridae.g__Hepandensovirus	k__Bacteria.p__Proteobacteria.c__Gammaproteobacteria.o__Methylococcales.f__Methylococcaceae.g__Methylomicrobium
k__Viruses.o__Caudovirales.f__Podoviridae.g__Phieco32likevirus	k__Bacteria.p__Actinobacteria.c__Actinobacteria.o__Pseudonocardiales.f__Pseudonocardiaceae.g__Sciscionella
k__Viruses.f__Reoviridae.g__Aquareovirus	k__Bacteria.p__Proteobacteria.c__Deltaproteobacteria.o__Myxococcales.f__Nannocystaceae.g__Plesiocystis
k__Viruses.f__Bromoviridae.g__Ilarvirus	k__Bacteria.p__Actinobacteria.c__Actinobacteria.o__Glycomycetales.f__Glycomycetaceae.g__Glycomyces
k__Viruses.f__Nanoviridae.g__Nanovirus	k__Bacteria.p__Acidobacteria.c__Acidobacteriia.o__Acidobacteriales.f__Acidobacteriaceae.g__Terracidiphilus
k__Viruses.f__Totiviridae.g__Trichomonasvirus	k__Bacteria.p__Firmicutes.c__Bacilli.o__Bacillales.f__Planococcaceae.g__Jeotgalibacillus
k__Viruses.f__Nanoviridae.g__Babuvirus	k__Bacteria.p__Actinobacteria.c__Actinobacteria.o__Streptomycetales.f__Streptomycetaceae.g__Kitasatospora
k__Viruses.f__Papillomaviridae.g__Dyoomikronpapillomavirus	k__Bacteria.p__Actinobacteria.c__Actinobacteria.o__Micrococcales.f__Micrococcaceae.g__Citricoccus
k__Viruses.f__Caulimoviridae.g__Soymovirus	k__Bacteria.p__Proteobacteria.c__Alphaproteobacteria.o__Rickettsiales.f__Anaplasmataceae.g__Ehrlichia
k__Viruses.f__Tombusviridae.g__Tombusvirus	k__Archaea.p__Euryarchaeota.c__Methanomicrobia.o__Methanosarcinales.f__Methanosarcinaceae.g__Methanosalsum
k__Viruses.f__Totiviridae.g__Leishmaniavirus	k__Archaea.p__Euryarchaeota.c__Methanococci.o__Methanococcales.f__Methanocaldococcaceae.g__Methanocaldococcus
k__Viruses.o__Caudovirales.f__Siphoviridae.g__Phic3unalikevirus	k__Bacteria.p__Firmicutes.c__Negativicutes.o__Acidaminococcales.f__Acidaminococcaceae.g__Succinispira
k__Viruses.f__Parvoviridae.g__Bocaparvovirus	k__Bacteria.p__Proteobacteria.c__Epsilonproteobacteria.o__Campylobacterales.f__Campylobacteraceae.g__Arcobacter
k__Viruses.o__Caudovirales.f__Siphoviridae.g__Hk578likevirus	k__Bacteria.p__Proteobacteria.c__Gammaproteobacteria.o__Chromatiales.f__Ectothiorhodospiraceae.g__Acidihalobacter
k__Viruses.o__Caudovirales.f__Siphoviridae.g__Tm4likevirus	k__Bacteria.p__Firmicutes.c__Clostridia.o__Clostridiales.f__Clostridiaceae.g__Thermobrachium
k__Viruses.o__Caudovirales.f__Siphoviridae.g__Che8likevirus	k__Bacteria.p__Proteobacteria.c__Alphaproteobacteria.o__Rhodobacterales.f__Rhodobacteraceae.g__Haematobacter
k__Viruses.f__Tombusviridae.g__Panicovirus	k__Bacteria.p__Spirochaetes.c__Spirochaetia.f__Leptospiraceae.g__Leptospira
k__Viruses.f__Papillomaviridae.g__Nupapillomavirus	k__Bacteria.p__Thermotogae.c__Thermotogae.o__Kosmotogales.f__Kosmotogaceae.g__Kosmotoga
k__Viruses.f__Orthomyxoviridae.g__Influenzavirus_A	k__Bacteria.p__Proteobacteria.c__Alphaproteobacteria.o__Rhizobiales.f__Phyllobacteriaceae.g__Aliihoeflea
k__Viruses.o__Caudovirales.f__Podoviridae.g__Ahjdlikevirus	k__Bacteria.p__Firmicutes.c__Bacilli.o__Bacillales.f__Planococcaceae.g__Viridibacillus
k__Viruses.o__Caudovirales.f__Podoviridae.g__Luz24likevirus	k__Bacteria.p__Actinobacteria.c__Actinobacteria.o__Glycomycetales.f__Glycomycetaceae.g__Stackebrandtia
k__Viruses.f__Anelloviridae.g__Zetatorquevirus	k__Bacteria.p__Deferribacteres.c__Deferribacteres.o__Deferribacterales.f__Deferribacteraceae.g__Geovibrio
k__Viruses.f__Barnaviridae.g__Barnavirus	k__Bacteria.p__Actinobacteria.c__Actinobacteria.o__Corynebacteriales.f__Gordoniaceae.g__Gordonia
k__Viruses.f__Parvoviridae.g__Tetraparvovirus	k__Bacteria.p__Proteobacteria.c__Gammaproteobacteria.o__Thiotrichales.f__Francisellaceae.g__Francisella
k__Viruses.f__Narnaviridae.g__Mitovirus	k__Bacteria.p__Firmicutes.c__Bacilli.o__Lactobacillales.f__Leuconostocaceae.g__Weissella
k__Viruses.o__Caudovirales.f__Siphoviridae.g__Charlielikevirus	k__Bacteria.p__Verrucomicrobia.c__Opitutae.o__Opitutales.f__Opitutaceae.g__Diplosphaera
k__Viruses.o__Nidovirales.f__Arteriviridae.g__Arterivirus	k__Bacteria.p__Actinobacteria.c__Coriobacteriia.o__Coriobacteriales.f__Coriobacteriaceae.g__Collinsella
k__Viruses.o__Mononegavirales.f__Rhabdoviridae.g__Perhabdovirus	k__Bacteria.p__Bacteroidetes.c__Bacteroidia.o__Bacteroidales.f__Marinilabiliaceae.g__Marinilabilia
k__Viruses.f__Potyviridae.g__Ipomovirus	k__Bacteria.p__Chloroflexi.c__Ktedonobacteria.o__Ktedonobacterales.f__Ktedonobacteraceae.g__Ktedonobacter
k__Viruses.f__Geminiviridae.g__Curtovirus	k__Bacteria.p__Actinobacteria.c__Actinobacteria.o__Micrococcales.f__Micrococcaceae.g__Sinomonas
k__Viruses.o__Picornavirales.f__Picornaviridae.g__Gallivirus	k__Bacteria.p__Proteobacteria.c__Gammaproteobacteria.o__Xanthomonadales.f__Rhodanobacteraceae.g__Dyella
k__Viruses.o__Caudovirales.f__Siphoviridae.g__Iebhlikevirus	k__Bacteria.p__Proteobacteria.c__Gammaproteobacteria.o__Cellvibrionales.f__Halieaceae.g__Haliea
k__Viruses.o__Caudovirales.f__Myoviridae.g__Mulikevirus	k__Bacteria.p__Proteobacteria.c__Alphaproteobacteria.o__Rhizobiales.f__Hyphomicrobiaceae.g__Prosthecomicrobium
k__Viruses.o__Picornavirales.g__Bacillarnavirus	k__Bacteria.p__Bacteroidetes.c__Flavobacteriia.o__Flavobacteriales.f__Flavobacteriaceae.g__Croceitalea
k__Viruses.f__Megabirnaviridae.g__Megabirnavirus	k__Bacteria.p__Proteobacteria.c__Epsilonproteobacteria.o__Nautiliales.f__Nautiliaceae.g__Lebetimonas
k__Viruses.f__Corticoviridae.g__Corticovirus	k__Bacteria.p__Firmicutes.c__Bacilli.o__Lactobacillales.f__Carnobacteriaceae.g__Carnobacterium
k__Viruses.f__Bunyaviridae.g__Nairovirus	k__Bacteria.p__Proteobacteria.c__Alphaproteobacteria.o__Rickettsiales.f__Rickettsiaceae.g__Rickettsia
k__Viruses.f__Caulimoviridae.g__Tungrovirus	k__Bacteria.p__Firmicutes.c__Clostridia.o__Halanaerobiales.f__Halobacteroidaceae.g__Orenia
k__Viruses.f__Retroviridae.g__Spumavirus	k__Bacteria.p__Proteobacteria.c__Deltaproteobacteria.o__Desulfobacterales.f__Desulfobacteraceae.g__Desulfospira
k__Viruses.f__Reoviridae.g__Mycoreovirus	k__Bacteria.p__Proteobacteria.c__Betaproteobacteria.o__Burkholderiales.g__Sphaerotilus
k__Viruses.o__Caudovirales.f__Myoviridae.g__Bcep78likevirus	k__Bacteria.p__Proteobacteria.c__Betaproteobacteria.o__Burkholderiales.f__Comamonadaceae.g__Caenimonas
k__Viruses.g__Idaeovirus	k__Bacteria.p__Bacteroidetes.c__Flavobacteriia.o__Flavobacteriales.f__Flavobacteriaceae.g__Myroides
k__Viruses.f__Narnaviridae.g__Narnavirus	k__Bacteria.p__Actinobacteria.c__Actinobacteria.o__Micrococcales.f__Sanguibacteraceae.g__Sanguibacter
k__Viruses.f__Reoviridae.g__Coltivirus	k__Bacteria.p__Proteobacteria.c__Gammaproteobacteria.o__Xanthomonadales.f__Xanthomonadaceae.g__Stenotrophomonas
k__Viruses.f__Totiviridae.g__Totivirus	k__Bacteria.p__Synergistetes.c__Synergistia.o__Synergistales.f__Synergistaceae.g__Jonquetella
k__Viroids.f__Pospiviroidae.g__Cocadviroid	k__Bacteria.p__Proteobacteria.c__Gammaproteobacteria.o__Xanthomonadales.f__Rhodanobacteraceae.g__Frateuria
k__Viruses.o__Caudovirales.f__Siphoviridae.g__Chilikevirus	k__Bacteria.p__Proteobacteria.c__Gammaproteobacteria.o__Enterobacteriales.f__Enterobacteriaceae.g__Buchnera
k__Viruses.f__Potyviridae.g__Tritimovirus	k__Bacteria.p__Proteobacteria.c__Deltaproteobacteria.o__Desulfurellales.f__Desulfurellaceae.g__Hippea
k__Viruses.f__Papillomaviridae.g__Kappapapillomavirus	k__Bacteria.p__Actinobacteria.c__Actinobacteria.o__Streptosporangiales.f__Streptosporangiaceae.g__Microtetraspora
k__Viruses.f__Reoviridae.g__Dinovernavirus	k__Bacteria.p__Proteobacteria.c__Deltaproteobacteria.o__Desulfovibrionales.f__Desulfomicrobiaceae.g__Desulfomicrobium
k__Viruses.f__Anelloviridae.g__Kappatorquevirus	k__Bacteria.p__Firmicutes.c__Clostridia.o__Clostridiales.g__Gottschalkia
k__Viruses.f__Potyviridae.g__Poacevirus	k__Bacteria.p__Aquificae.c__Aquificae.o__Aquificales.f__Aquificaceae.g__Hydrogenobacter
k__Viruses.f__Iridoviridae.g__Megalocytivirus	k__Bacteria.p__Proteobacteria.c__Gammaproteobacteria.o__Vibrionales.f__Vibrionaceae.g__Enterovibrio
k__Viruses.o__Mononegavirales.f__Rhabdoviridae.g__Nucleorhabdovirus	k__Bacteria.p__Firmicutes.c__Clostridia.o__Clostridiales.f__Christensenellaceae.g__Christensenella
k__Viruses.o__Mononegavirales.f__Rhabdoviridae.g__Tibrovirus	k__Bacteria.p__Firmicutes.c__Clostridia.o__Clostridiales.f__Lachnospiraceae.g__Anaerostipes
k__Viruses.f__Closteroviridae.g__Velarivirus	k__Archaea.p__Euryarchaeota.c__Methanomicrobia.o__Methanomicrobiales.f__Methanomicrobiaceae.g__Methanofollis
k__Viruses.f__Papillomaviridae.g__Rhopapillomavirus	k__Bacteria.p__Actinobacteria.c__Acidimicrobiia.o__Acidimicrobiales.f__Microthrixaceae.g__Candidatus_Microthrix
k__Viruses.o__Tymovirales.f__Betaflexiviridae.g__Capillovirus	k__Bacteria.p__Proteobacteria.c__Alphaproteobacteria.o__Rhizobiales.f__Rhizobiaceae.g__Kaistia
k__Viruses.g__Varicosavirus	k__Bacteria.p__Proteobacteria.c__Alphaproteobacteria.o__Rhizobiales.f__Hyphomicrobiaceae.g__Pelagibacterium
k__Viruses.f__Hepadnaviridae.g__Avihepadnavirus	k__Bacteria.p__Proteobacteria.c__Alphaproteobacteria.o__Rhodospirillales.f__Acetobacteraceae.g__Gluconobacter
k__Viruses.o__Caudovirales.f__Siphoviridae.g__Bronlikevirus	k__Bacteria.p__Proteobacteria.c__Gammaproteobacteria.o__Cellvibrionales.f__Halieaceae.g__Congregibacter
k__Viroids.f__Pospiviroidae.g__Coleviroid	k__Bacteria.p__Proteobacteria.c__Alphaproteobacteria.o__Rickettsiales.f__Anaplasmataceae.g__Candidatus_Neoehrlichia
k__Viroids.f__Avsunviroidae.g__Pelamoviroid	k__Bacteria.p__Firmicutes.c__Bacilli.o__Bacillales.f__Bacillaceae.g__Gracilibacillus
k__Viruses.o__Caudovirales.f__Podoviridae.g__Bppunalikevirus	k__Bacteria.p__Proteobacteria.c__Alphaproteobacteria.o__Sphingomonadales.f__Sphingomonadaceae.g__Sphingopyxis
k__Viruses.o__Caudovirales.f__Siphoviridae.g__D3likevirus	k__Bacteria.p__Proteobacteria.c__Alphaproteobacteria.o__Rhodobacterales.f__Rhodobacteraceae.g__Labrenzia
k__Viruses.f__Caliciviridae.g__Norovirus	k__Bacteria.p__Fusobacteria.c__Fusobacteriia.o__Fusobacteriales.f__Leptotrichiaceae.g__Sneathia
k__Viruses.f__Leviviridae.g__Allolevivirus	k__Bacteria.p__Cyanobacteria.o__Chroococcales.g__Acaryochloris
k__Viruses.f__Microviridae.g__Bdellomicrovirus	k__Bacteria.p__Proteobacteria.c__Alphaproteobacteria.o__Rhodobacterales.f__Rhodobacteraceae.g__Citreicella
k__Viruses.o__Caudovirales.f__Siphoviridae.g__Omegalikevirus	k__Bacteria.p__Actinobacteria.c__Actinobacteria.o__Micrococcales.f__Promicromonosporaceae.g__Promicromonospora
k__Viruses.o__Picornavirales.f__Picornaviridae.g__Sakobuvirus	k__Bacteria.p__Bacteroidetes.c__Sphingobacteriia.o__Sphingobacteriales.f__Sphingobacteriaceae.g__Pseudopedobacter
k__Viruses.f__Plasmaviridae.g__Plasmavirus	k__Archaea.p__Euryarchaeota.c__Halobacteria.o__Haloferacales.f__Haloferacaceae.g__Halolamina
k__Viroids.f__Pospiviroidae.g__Apscaviroid	k__Bacteria.p__Firmicutes.c__Clostridia.o__Thermoanaerobacterales.f__Thermoanaerobacteraceae.g__Thermacetogenium
k__Viruses.o__Caudovirales.f__Siphoviridae.g__Pbiunalikevirus	k__Bacteria.p__Proteobacteria.c__Gammaproteobacteria.o__Enterobacteriales.f__Enterobacteriaceae.g__Dickeya
k__Viruses.f__Microviridae.g__Spiromicrovirus	k__Bacteria.p__Synergistetes.c__Synergistia.o__Synergistales.f__Synergistaceae.g__Aminiphilus
k__Viruses.f__Papillomaviridae.g__Dyopipapillomavirus	k__Bacteria.p__Actinobacteria.c__Actinobacteria.o__Corynebacteriales.f__Segniliparaceae.g__Segniliparus
k__Viruses.o__Caudovirales.f__Siphoviridae.g__Cjwunalikevirus	k__Archaea.p__Euryarchaeota.g__Aciduliprofundum
k__Bacteria.p__Proteobacteria.c__Gammaproteobacteria.o__Oceanospirillales.f__Halomonadaceae.g__Cobetia	k__Bacteria.p__Proteobacteria.c__Alphaproteobacteria.o__Rhodospirillales.f__Acetobacteraceae.g__Granulibacter
k__Bacteria.p__Firmicutes.c__Clostridia.o__Thermoanaerobacterales.f__Thermoanaerobacteraceae.g__Ammonifex	k__Bacteria.p__Proteobacteria.c__Alphaproteobacteria.o__Rhodospirillales.g__Reyranella
k__Bacteria.p__Actinobacteria.c__Actinobacteria.o__Corynebacteriales.f__Tsukamurellaceae.g__Tsukamurella	k__Bacteria.p__Firmicutes.c__Negativicutes.o__Selenomonadales.f__Selenomonadaceae.g__Mitsuokella
k__Bacteria.p__Bacteroidetes.c__Flavobacteriia.o__Flavobacteriales.f__Cryomorphaceae.g__Owenweeksia	k__Bacteria.p__Verrucomicrobia.c__Opitutae.o__Opitutales.f__Opitutaceae.g__Cephaloticoccus
k__Bacteria.o__Haloplasmatales.f__Haloplasmataceae.g__Haloplasma	k__Bacteria.p__Proteobacteria.c__Gammaproteobacteria.o__Cellvibrionales.f__Spongiibacteraceae.g__Zhongshania
k__Bacteria.p__Proteobacteria.c__Deltaproteobacteria.o__Desulfobacterales.f__Desulfobacteraceae.g__Desulfosarcina	k__Bacteria.p__Proteobacteria.c__Alphaproteobacteria.o__Rhodobacterales.f__Rhodobacteraceae.g__Salipiger
k__Bacteria.p__Proteobacteria.c__Gammaproteobacteria.o__Enterobacteriales.f__Enterobacteriaceae.g__Siccibacter	k__Bacteria.p__Actinobacteria.c__Actinobacteria.o__Micrococcales.f__Micrococcaceae.g__Paeniglutamicibacter
k__Bacteria.p__Proteobacteria.c__Alphaproteobacteria.o__Rhodospirillales.f__Acetobacteraceae.g__Asaia	k__Bacteria.p__Actinobacteria.c__Actinobacteria.o__Micrococcales.f__Microbacteriaceae.g__Rathayibacter
k__Bacteria.p__Proteobacteria.c__Alphaproteobacteria.o__Rhizobiales.f__Rhodobiaceae.g__Parvibaculum	k__Bacteria.p__Firmicutes.c__Bacilli.o__Bacillales.f__Bacillaceae.g__Aeribacillus
k__Bacteria.p__Cyanobacteria.o__Chroococcales.g__Neosynechococcus	k__Bacteria.p__Rhodothermaeota.c__Balneolia.o__Balneolales.f__Balneolaceae.g__Balneola
k__Bacteria.p__Proteobacteria.c__Alphaproteobacteria.o__Sphingomonadales.f__Sphingomonadaceae.g__Zymomonas	k__Bacteria.p__Bacteroidetes.c__Cytophagia.o__Cytophagales.f__Thermonemataceae.g__Thermonema
k__Bacteria.p__Proteobacteria.c__Betaproteobacteria.o__Rhodocyclales.f__Rhodocyclaceae.g__Sulfuritalea	k__Bacteria.p__Thermotogae.c__Thermotogae.o__Petrotogales.g__Petrotoga
k__Bacteria.p__Actinobacteria.c__Actinobacteria.o__Pseudonocardiales.f__Pseudonocardiaceae.g__Kutzneria	k__Bacteria.p__Proteobacteria.c__Gammaproteobacteria.o__Legionellales.f__Legionellaceae.g__Legionella
k__Bacteria.p__Proteobacteria.c__Gammaproteobacteria.o__Chromatiales.f__Chromatiaceae.g__Marichromatium	k__Bacteria.p__Firmicutes.c__Bacilli.o__Lactobacillales.f__Enterococcaceae.g__Melissococcus
k__Bacteria.p__Proteobacteria.c__Alphaproteobacteria.o__Rhizobiales.g__Methyloceanibacter	k__Bacteria.p__Proteobacteria.c__Alphaproteobacteria.o__Rhizobiales.f__Rhizobiaceae.g__Shinella
k__Bacteria.p__Firmicutes.c__Bacilli.o__Bacillales.f__Bacillaceae.g__Anoxybacillus	k__Bacteria.p__Proteobacteria.c__Alphaproteobacteria.o__Rhizobiales.f__Xanthobacteraceae.g__Ancylobacter
k__Bacteria.p__Proteobacteria.c__Alphaproteobacteria.o__Rhodobacterales.f__Rhodobacteraceae.g__Roseivivax	k__Bacteria.p__Proteobacteria.c__Gammaproteobacteria.o__Alteromonadales.f__Alteromonadaceae.g__Aliiglaciecola
k__Archaea.p__Euryarchaeota.c__Halobacteria.o__Natrialbales.f__Natrialbaceae.g__Haloterrigena	k__Bacteria.p__Proteobacteria.c__Alphaproteobacteria.o__Rhodobacterales.f__Rhodobacteraceae.g__Maritimibacter
k__Archaea.p__Euryarchaeota.c__Halobacteria.o__Natrialbales.f__Natrialbaceae.g__Halobiforma	k__Bacteria.p__Chlorobi.c__Chlorobia.o__Chlorobiales.f__Chlorobiaceae.g__Prosthecochloris
k__Bacteria.p__Proteobacteria.c__Gammaproteobacteria.o__Enterobacteriales.f__Enterobacteriaceae.g__Pragia	k__Bacteria.p__Actinobacteria.c__Actinobacteria.o__Micrococcales.f__Dermacoccaceae.g__Luteipulveratus
k__Bacteria.p__Firmicutes.c__Clostridia.o__Clostridiales.f__Clostridiaceae.g__Fervidicella	k__Bacteria.p__Firmicutes.c__Erysipelotrichia.o__Erysipelotrichales.f__Erysipelotrichaceae.g__Faecalicoccus
k__Bacteria.p__Chloroflexi.c__Anaerolineae.o__Anaerolineales.f__Anaerolineaceae.g__Ornatilinea	k__Bacteria.p__Firmicutes.c__Clostridia.o__Clostridiales.f__Clostridiales_Family_XVII._Incertae_Sedis.g__Thermaerobacter
k__Bacteria.p__Proteobacteria.c__Gammaproteobacteria.o__Enterobacteriales.f__Enterobacteriaceae.g__Wigglesworthia	k__Bacteria.p__Verrucomicrobia.c__Spartobacteria.g__Terrimicrobium
k__Bacteria.p__Cyanobacteria.o__Nostocales.f__Nostocaceae.g__Dolichospermum	k__Bacteria.p__Proteobacteria.c__Gammaproteobacteria.o__Alteromonadales.f__Alteromonadaceae.g__Aestuariibacter
k__Bacteria.p__Proteobacteria.c__Deltaproteobacteria.o__Desulfarculales.f__Desulfarculaceae.g__Desulfocarbo	k__Bacteria.p__Bacteroidetes.c__Flavobacteriia.o__Flavobacteriales.f__Flavobacteriaceae.g__Mesonia
k__Bacteria.p__Bacteroidetes.c__Bacteroidia.o__Bacteroidales.f__Porphyromonadaceae.g__Barnesiella	k__Bacteria.p__Gemmatimonadetes.c__Gemmatimonadetes.o__Gemmatimonadales.f__Gemmatimonadaceae.g__Gemmatimonas
k__Bacteria.p__Proteobacteria.c__Alphaproteobacteria.o__Rhizobiales.f__Phyllobacteriaceae.g__Aliihoeflea	k__Bacteria.p__Actinobacteria.c__Actinobacteria.o__Actinomycetales.f__Actinomycetaceae.g__Actinomyces
k__Bacteria.p__Gemmatimonadetes.c__Gemmatimonadetes.o__Gemmatimonadales.f__Gemmatimonadaceae.g__Gemmatimonas	k__Bacteria.p__Actinobacteria.c__Actinobacteria.o__Glycomycetales.f__Glycomycetaceae.g__Haloglycomyces
k__Bacteria.p__Proteobacteria.c__Gammaproteobacteria.o__Pasteurellales.f__Pasteurellaceae.g__Actinobacillus	k__Bacteria.p__Bacteroidetes.c__Bacteroidia.o__Bacteroidales.f__Marinilabiliaceae.g__Saccharicrinis
k__Bacteria.p__Proteobacteria.c__Gammaproteobacteria.o__Chromatiales.f__Ectothiorhodospiraceae.g__Ectothiorhodospira	k__Bacteria.p__Actinobacteria.c__Acidimicrobiia.o__Acidimicrobiales.f__Acidimicrobiaceae.g__Acidimicrobium
k__Bacteria.p__Proteobacteria.c__Gammaproteobacteria.o__Enterobacteriales.f__Enterobacteriaceae.g__Proteus	k__Bacteria.p__Actinobacteria.c__Actinobacteria.o__Micrococcales.f__Micrococcaceae.g__Micrococcus
k__Bacteria.p__Firmicutes.c__Clostridia.o__Clostridiales.f__Eubacteriaceae.g__Eubacterium	k__Bacteria.p__Actinobacteria.c__Actinobacteria.o__Micrococcales.f__Microbacteriaceae.g__Agromyces
k__Bacteria.p__Proteobacteria.c__Betaproteobacteria.o__Burkholderiales.f__Comamonadaceae.g__Polaromonas	k__Bacteria.p__Actinobacteria.c__Actinobacteria.o__Frankiales.f__Sporichthyaceae.g__Sporichthya
k__Bacteria.p__Cyanobacteria.o__Chroococcales.g__Cyanobacterium	k__Bacteria.p__Bacteroidetes.c__Cytophagia.o__Cytophagales.f__Cytophagaceae.g__Leadbetterella
k__Bacteria.p__Proteobacteria.c__Gammaproteobacteria.o__Enterobacteriales.f__Enterobacteriaceae.g__Cronobacter	k__Bacteria.p__Proteobacteria.c__Betaproteobacteria.o__Neisseriales.f__Neisseriaceae.g__Snodgrassella
k__Bacteria.p__Bacteroidetes.c__Flavobacteriia.o__Flavobacteriales.f__Flavobacteriaceae.g__Leeuwenhoekiella	k__Bacteria.p__Proteobacteria.c__Betaproteobacteria.o__Methylophilales.f__Methylophilaceae.g__Methylobacillus
k__Bacteria.p__Actinobacteria.c__Actinobacteria.o__Micrococcales.f__Dermabacteraceae.g__Dermabacter	k__Bacteria.p__Proteobacteria.c__Betaproteobacteria.o__Methylophilales.f__Methylophilaceae.g__Methylovorus
k__Bacteria.p__Proteobacteria.c__Betaproteobacteria.o__Rhodocyclales.f__Rhodocyclaceae.g__Azoarcus	k__Bacteria.p__Planctomycetes.c__Planctomycetia.o__Planctomycetales.f__Planctomycetaceae.g__Planctomyces
k__Bacteria.p__Bacteroidetes.c__Chitinophagia.o__Chitinophagales.f__Saprospiraceae.g__Phaeodactylibacter	k__Bacteria.p__Proteobacteria.c__Alphaproteobacteria.o__Rhodobacterales.f__Rhodobacteraceae.g__Actibacterium
k__Bacteria.p__Proteobacteria.c__Betaproteobacteria.o__Burkholderiales.f__Oxalobacteraceae.g__Duganella	k__Bacteria.p__Bacteroidetes.c__Flavobacteriia.o__Flavobacteriales.f__Flavobacteriaceae.g__Kordia
k__Bacteria.p__Proteobacteria.c__Gammaproteobacteria.o__Enterobacteriales.f__Enterobacteriaceae.g__Tatumella	k__Bacteria.p__Actinobacteria.c__Actinobacteria.o__Pseudonocardiales.f__Pseudonocardiaceae.g__Thermocrispum
k__Bacteria.p__Aquificae.c__Aquificae.o__Aquificales.f__Aquificaceae.g__Hydrogenivirga	k__Bacteria.p__Cyanobacteria.o__Oscillatoriales.g__Lyngbya
k__Bacteria.p__Firmicutes.c__Bacilli.o__Bacillales.f__Bacillaceae.g__Thalassobacillus	k__Bacteria.p__Proteobacteria.c__Betaproteobacteria.o__Burkholderiales.f__Oxalobacteraceae.g__Noviherbaspirillum
k__Bacteria.p__Firmicutes.c__Clostridia.o__Clostridiales.f__Clostridiaceae.g__Candidatus_Arthromitus	k__Bacteria.p__Proteobacteria.c__Alphaproteobacteria.o__Rhodospirillales.f__Rhodospirillaceae.g__Azospirillum
k__Bacteria.p__Proteobacteria.c__Gammaproteobacteria.o__Oceanospirillales.f__Oceanospirillaceae.g__Neptunomonas	k__Bacteria.p__Bacteroidetes.c__Flavobacteriia.o__Flavobacteriales.f__Flavobacteriaceae.g__Formosa
k__Bacteria.p__Proteobacteria.c__Gammaproteobacteria.o__Alteromonadales.f__Alteromonadaceae.g__Salinimonas	k__Bacteria.p__Proteobacteria.c__Deltaproteobacteria.o__Myxococcales.f__Myxococcaceae.g__Corallococcus
k__Bacteria.p__Bacteroidetes.c__Flavobacteriia.o__Flavobacteriales.f__Flavobacteriaceae.g__Weeksella	k__Bacteria.p__Nitrospirae.c__Nitrospira.o__Nitrospirales.f__Nitrospiraceae.g__Nitrospira
k__Bacteria.p__Bacteroidetes.c__Cytophagia.o__Cytophagales.f__Cytophagaceae.g__Runella	k__Bacteria.p__Proteobacteria.c__Alphaproteobacteria.o__Sphingomonadales.f__Erythrobacteraceae.g__Altererythrobacter
k__Bacteria.p__Actinobacteria.c__Actinobacteria.o__Micrococcales.f__Micrococcaceae.g__Enteractinococcus	k__Bacteria.p__Proteobacteria.c__Alphaproteobacteria.o__Rhizobiales.f__Rhodobiaceae.g__Candidatus_Phaeomarinobacter
k__Bacteria.p__Actinobacteria.c__Actinobacteria.o__Micrococcales.f__Ruaniaceae.g__Ruania	k__Archaea.p__Euryarchaeota.c__Methanobacteria.o__Methanobacteriales.f__Methanobacteriaceae.g__Methanobrevibacter
k__Bacteria.p__Proteobacteria.c__Betaproteobacteria.o__Burkholderiales.f__Burkholderiaceae.g__Pandoraea	k__Bacteria.p__Firmicutes.c__Erysipelotrichia.o__Erysipelotrichales.f__Erysipelotrichaceae.g__Solobacterium
k__Bacteria.p__Acidobacteria.c__Holophagae.o__Holophagales.f__Holophagaceae.g__Geothrix	k__Archaea.p__Crenarchaeota.c__Thermoprotei.o__Desulfurococcales.f__Pyrodictiaceae.g__Pyrodictium
k__Bacteria.p__Firmicutes.c__Clostridia.o__Thermoanaerobacterales.f__Thermoanaerobacterales_Family_III._Incertae_Sedis.g__Thermoanaerobacterium	k__Archaea.p__Euryarchaeota.c__Halobacteria.o__Halobacteriales.f__Halobacteriaceae.g__Halalkalicoccus
k__Bacteria.p__Firmicutes.c__Negativicutes.o__Selenomonadales.f__Sporomusaceae.g__Anaeroarcus	k__Bacteria.p__Cyanobacteria.o__Chroococcales.g__Aphanocapsa
k__Bacteria.p__Actinobacteria.c__Actinobacteria.o__Micrococcales.f__Demequinaceae.g__Lysinimicrobium	k__Bacteria.p__Proteobacteria.c__Alphaproteobacteria.o__Rhodobacterales.f__Rhodobacteraceae.g__Rhodobacter
k__Bacteria.p__Proteobacteria.c__Gammaproteobacteria.o__Pasteurellales.f__Pasteurellaceae.g__Bibersteinia	k__Bacteria.p__Lentisphaerae.c__Lentisphaeria.o__Lentisphaerales.f__Lentisphaeraceae.g__Lentisphaera
k__Bacteria.p__Firmicutes.c__Clostridia.o__Clostridiales.f__Lachnospiraceae.g__Dorea	k__Archaea.p__Euryarchaeota.c__Methanomicrobia.o__Methanosarcinales.f__Candidatus_Methanoperedenaceae.g__Candidatus_Methanoperedens
k__Bacteria.p__Actinobacteria.c__Actinobacteria.o__Micrococcales.f__Microbacteriaceae.g__Cryocola	k__Bacteria.p__Firmicutes.c__Negativicutes.o__Veillonellales.f__Veillonellaceae.g__Dialister
k__Bacteria.p__Firmicutes.c__Clostridia.o__Clostridiales.f__Peptococcaceae.g__Candidatus_Desulforudis	k__Bacteria.p__Actinobacteria.c__Actinobacteria.o__Pseudonocardiales.f__Pseudonocardiaceae.g__Lechevalieria
k__Bacteria.p__Thermotogae.c__Thermotogae.o__Petrotogales.g__Defluviitoga	k__Bacteria.p__Firmicutes.c__Bacilli.o__Bacillales.f__Thermoactinomycetaceae.g__Shimazuella
k__Bacteria.p__Firmicutes.c__Clostridia.o__Clostridiales.f__Peptococcaceae.g__Desulfitobacterium	k__Bacteria.p__Actinobacteria.c__Actinobacteria.o__Corynebacteriales.f__Dietziaceae.g__Dietzia
k__Bacteria.p__Actinobacteria.c__Actinobacteria.o__Streptosporangiales.f__Streptosporangiaceae.g__Streptosporangium	k__Bacteria.p__Proteobacteria.c__Gammaproteobacteria.o__Alteromonadales.f__Alteromonadaceae.g__Agarivorans
k__Bacteria.p__Chlamydiae.c__Chlamydiia.o__Chlamydiales.f__Parachlamydiaceae.g__Neochlamydia	k__Bacteria.p__Proteobacteria.c__Betaproteobacteria.o__Burkholderiales.f__Comamonadaceae.g__Comamonas
k__Bacteria.p__Bacteroidetes.c__Flavobacteriia.o__Flavobacteriales.f__Flavobacteriaceae.g__Croceibacter	k__Bacteria.p__Actinobacteria.c__Actinobacteria.o__Streptosporangiales.f__Thermomonosporaceae.g__Actinomadura
k__Bacteria.p__Deinococcus.Thermus.c__Deinococci.o__Deinococcales.f__Trueperaceae.g__Truepera	k__Archaea.p__Euryarchaeota.c__Methanobacteria.o__Methanobacteriales.f__Methanobacteriaceae.g__Methanobacterium
k__Bacteria.p__Proteobacteria.c__Alphaproteobacteria.o__Rhodospirillales.f__Acetobacteraceae.g__Kozakia	k__Bacteria.p__Actinobacteria.c__Actinobacteria.o__Propionibacteriales.f__Nocardioidaceae.g__Nocardioides
k__Bacteria.p__Proteobacteria.c__Alphaproteobacteria.o__Rhodobacterales.f__Hyphomonadaceae.g__Ponticaulis	k__Archaea.p__Euryarchaeota.c__Methanomicrobia.o__Methanocellales.f__Methanocellaceae.g__Methanocella
k__Bacteria.p__Firmicutes.c__Bacilli.o__Bacillales.f__Thermoactinomycetaceae.g__Risungbinella	k__Bacteria.p__Bacteroidetes.o__Bacteroidetes_Order_II._Incertae_sedis.f__Rhodothermaceae.g__Salinibacter
k__Bacteria.p__Cyanobacteria.o__Oscillatoriales.g__Arthrospira	k__Bacteria.p__Proteobacteria.c__Alphaproteobacteria.o__Rhodobacterales.f__Rhodobacteraceae.g__Thalassobius
k__Bacteria.p__Proteobacteria.c__Gammaproteobacteria.o__Legionellales.f__Coxiellaceae.g__Rickettsiella	k__Bacteria.p__Proteobacteria.c__Alphaproteobacteria.o__Parvularculales.f__Parvularculaceae.g__Parvularcula
k__Bacteria.p__Firmicutes.c__Bacilli.o__Lactobacillales.f__Carnobacteriaceae.g__Carnobacterium	k__Bacteria.p__Bacteroidetes.c__Cytophagia.o__Cytophagales.f__Cytophagaceae.g__Dyadobacter
k__Bacteria.p__Proteobacteria.c__Gammaproteobacteria.o__Orbales.f__Orbaceae.g__Gilliamella	k__Bacteria.p__Actinobacteria.c__Actinobacteria.o__Micrococcales.f__Dermabacteraceae.g__Brachybacterium
k__Bacteria.p__Proteobacteria.c__Betaproteobacteria.o__Neisseriales.f__Chromobacteriaceae.g__Laribacter	k__Bacteria.p__Firmicutes.c__Tissierellia.o__Tissierellales.f__Peptoniphilaceae.g__Anaerococcus
k__Bacteria.p__Proteobacteria.c__Gammaproteobacteria.o__Vibrionales.f__Vibrionaceae.g__Salinivibrio	k__Bacteria.p__Bacteroidetes.c__Flavobacteriia.o__Flavobacteriales.f__Flavobacteriaceae.g__Siansivirga
k__Bacteria.p__Bacteroidetes.c__Flavobacteriia.o__Flavobacteriales.f__Flavobacteriaceae.g__Formosa	k__Bacteria.p__Proteobacteria.c__Gammaproteobacteria.o__Pasteurellales.f__Pasteurellaceae.g__Histophilus
k__Bacteria.p__Proteobacteria.c__Gammaproteobacteria.o__Enterobacteriales.f__Enterobacteriaceae.g__Cedecea	k__Bacteria.p__Bacteroidetes.c__Bacteroidia.o__Bacteroidales.f__Porphyromonadaceae.g__Barnesiella
k__Bacteria.p__Actinobacteria.c__Actinobacteria.o__Acidothermales.f__Acidothermaceae.g__Acidothermus	k__Bacteria.p__Proteobacteria.c__Gammaproteobacteria.o__Nevskiales.f__Sinobacteraceae.g__Solimonas
k__Bacteria.p__Actinobacteria.c__Actinobacteria.o__Micromonosporales.f__Micromonosporaceae.g__Micromonospora	k__Bacteria.p__Proteobacteria.c__Alphaproteobacteria.o__Rhodobacterales.f__Rhodobacteraceae.g__Pannonibacter
k__Bacteria.p__Cyanobacteria.o__Pleurocapsales.g__Stanieria	k__Bacteria.p__Firmicutes.c__Clostridia.o__Clostridiales.f__Peptostreptococcaceae.g__Filifactor
k__Bacteria.p__Proteobacteria.c__Deltaproteobacteria.o__Myxococcales.f__Cystobacteraceae.g__Hyalangium	k__Bacteria.p__Actinobacteria.c__Actinobacteria.o__Micrococcales.f__Microbacteriaceae.g__Cryocola
k__Bacteria.p__Bacteroidetes.c__Flavobacteriia.o__Flavobacteriales.f__Flavobacteriaceae.g__Imtechella	k__Bacteria.p__Actinobacteria.c__Actinobacteria.o__Micrococcales.f__Micrococcaceae.g__Rothia
k__Bacteria.p__Firmicutes.c__Bacilli.o__Bacillales.f__Bacillaceae.g__Caldibacillus	k__Bacteria.p__Firmicutes.c__Negativicutes.g__Anaerosporomusa
k__Bacteria.p__Proteobacteria.c__Gammaproteobacteria.o__Enterobacteriales.f__Enterobacteriaceae.g__Hafnia	k__Bacteria.p__Firmicutes.c__Tissierellia.o__Tissierellales.f__Peptoniphilaceae.g__Finegoldia
k__Bacteria.p__Proteobacteria.c__Gammaproteobacteria.o__Enterobacteriales.f__Enterobacteriaceae.g__Yersinia	k__Bacteria.p__Bacteroidetes.c__Cytophagia.o__Cytophagales.f__Cytophagaceae.g__Fibrella
k__Bacteria.p__Firmicutes.c__Clostridia.o__Clostridiales.f__Eubacteriaceae.g__Acetobacterium	k__Archaea.p__Euryarchaeota.c__Methanomicrobia.o__Methanosarcinales.f__Methanosarcinaceae.g__Methanosarcina
k__Bacteria.p__Actinobacteria.c__Actinobacteria.o__Corynebacteriales.f__Nocardiaceae.g__Nocardia	k__Bacteria.p__Actinobacteria.c__Actinobacteria.o__Micrococcales.f__Demequinaceae.g__Lysinimicrobium
k__Bacteria.p__Firmicutes.c__Bacilli.o__Lactobacillales.f__Aerococcaceae.g__Facklamia	k__Bacteria.p__Proteobacteria.c__Gammaproteobacteria.o__Alteromonadales.f__Pseudoalteromonadaceae.g__Algicola
k__Bacteria.p__Proteobacteria.c__Betaproteobacteria.o__Rhodocyclales.f__Rhodocyclaceae.g__Aromatoleum	k__Bacteria.p__Bacteroidetes.c__Flavobacteriia.o__Flavobacteriales.f__Flavobacteriaceae.g__Algibacter
k__Bacteria.p__Firmicutes.c__Clostridia.o__Clostridiales.f__Peptostreptococcaceae.g__Clostridioides	k__Bacteria.p__Firmicutes.c__Bacilli.o__Bacillales.f__Planococcaceae.g__Solibacillus
k__Bacteria.p__Acidobacteria.c__Acidobacteriia.o__Acidobacteriales.f__Acidobacteriaceae.g__Terracidiphilus	k__Archaea.p__Euryarchaeota.c__Halobacteria.o__Haloferacales.f__Haloferacaceae.g__Haloplanus
k__Bacteria.p__Proteobacteria.c__Gammaproteobacteria.o__Xanthomonadales.f__Xanthomonadaceae.g__Thermomonas	k__Bacteria.p__Actinobacteria.c__Actinobacteria.o__Geodermatophilales.f__Geodermatophilaceae.g__Blastococcus
k__Bacteria.p__Cyanobacteria.o__Chroococcales.g__Crocosphaera	k__Bacteria.p__Proteobacteria.c__Alphaproteobacteria.o__Rhodobacterales.f__Rhodobacteraceae.g__Octadecabacter
k__Bacteria.p__Actinobacteria.c__Actinobacteria.o__Jiangellales.f__Jiangellaceae.g__Jiangella	k__Bacteria.p__Proteobacteria.c__Deltaproteobacteria.o__Syntrophobacterales.f__Syntrophobacteraceae.g__Syntrophobacter
k__Bacteria.p__Proteobacteria.c__Alphaproteobacteria.o__Rhodospirillales.f__Acetobacteraceae.g__Roseomonas	k__Bacteria.p__Proteobacteria.c__Gammaproteobacteria.o__Enterobacteriales.f__Enterobacteriaceae.g__Candidatus_Hamiltonella
k__Bacteria.p__Synergistetes.c__Synergistia.o__Synergistales.f__Synergistaceae.g__Aminiphilus	k__Bacteria.p__Proteobacteria.c__Alphaproteobacteria.o__Rhodobacterales.f__Hyphomonadaceae.g__Maricaulis
k__Bacteria.p__Bacteroidetes.c__Flavobacteriia.o__Flavobacteriales.f__Flavobacteriaceae.g__Lacinutrix	k__Bacteria.p__Cyanobacteria.o__Oscillatoriales.g__Planktothrix
k__Bacteria.p__Actinobacteria.c__Actinobacteria.o__Actinomycetales.f__Actinomycetaceae.g__Mobiluncus	k__Bacteria.p__Proteobacteria.c__Gammaproteobacteria.o__Enterobacteriales.f__Enterobacteriaceae.g__Candidatus_Riesia
k__Bacteria.p__Thermotogae.c__Thermotogae.o__Petrotogales.g__Marinitoga	k__Bacteria.p__Proteobacteria.c__Alphaproteobacteria.o__Rhodobacterales.f__Rhodobacteraceae.g__Thioclava
k__Bacteria.p__Proteobacteria.c__Gammaproteobacteria.o__Enterobacteriales.f__Enterobacteriaceae.g__Rouxiella	k__Bacteria.p__Firmicutes.c__Bacilli.o__Bacillales.f__Bacillaceae.g__Caldalkalibacillus
k__Bacteria.p__Cyanobacteria.o__Chroococcales.g__Thermosynechococcus	k__Bacteria.p__Proteobacteria.c__Alphaproteobacteria.o__Rhizobiales.f__Bradyrhizobiaceae.g__Rhodopseudomonas
k__Bacteria.p__Proteobacteria.c__Alphaproteobacteria.o__Rhodobacterales.f__Rhodobacteraceae.g__Tropicibacter	k__Bacteria.p__Tenericutes.c__Mollicutes.o__Mycoplasmatales.f__Mycoplasmataceae.g__Mycoplasma
k__Bacteria.p__Firmicutes.c__Clostridia.o__Clostridiales.f__Syntrophomonadaceae.g__Syntrophothermus	k__Bacteria.p__Proteobacteria.c__Betaproteobacteria.o__Neisseriales.f__Chromobacteriaceae.g__Chitinibacter
k__Archaea.p__Crenarchaeota.c__Thermoprotei.o__Desulfurococcales.f__Pyrodictiaceae.g__Hyperthermus	k__Bacteria.p__Proteobacteria.c__Gammaproteobacteria.o__Cardiobacteriales.f__Cardiobacteriaceae.g__Cardiobacterium
k__Bacteria.p__Planctomycetes.c__Planctomycetia.o__Planctomycetales.f__Planctomycetaceae.g__Pirellula	k__Bacteria.p__Bacteroidetes.c__Flavobacteriia.o__Flavobacteriales.f__Flavobacteriaceae.g__Epilithonimonas
k__Bacteria.p__Proteobacteria.c__Alphaproteobacteria.o__Rhodobacterales.f__Rhodobacteraceae.g__Maritimibacter	k__Archaea.p__Euryarchaeota.c__Halobacteria.o__Natrialbales.f__Natrialbaceae.g__Halobiforma
k__Bacteria.p__Firmicutes.c__Bacilli.o__Bacillales.f__Bacillaceae.g__Salsuginibacillus	k__Bacteria.p__Firmicutes.c__Clostridia.o__Clostridiales.f__Lachnospiraceae.g__Catonella
k__Bacteria.p__Synergistetes.c__Synergistia.o__Synergistales.f__Synergistaceae.g__Thermanaerovibrio	k__Bacteria.p__Proteobacteria.c__Alphaproteobacteria.o__Sphingomonadales.f__Erythrobacteraceae.g__Porphyrobacter
k__Bacteria.p__Proteobacteria.c__Gammaproteobacteria.o__Cardiobacteriales.f__Cardiobacteriaceae.g__Dichelobacter	k__Bacteria.p__Proteobacteria.c__Alphaproteobacteria.o__Rhizobiales.f__Bradyrhizobiaceae.g__Bosea
k__Bacteria.p__Actinobacteria.c__Actinobacteria.o__Bifidobacteriales.f__Bifidobacteriaceae.g__Bifidobacterium	k__Bacteria.p__Acidobacteria.c__Blastocatellia.g__Pyrinomonas
k__Bacteria.p__Actinobacteria.c__Coriobacteriia.o__Coriobacteriales.f__Coriobacteriaceae.g__Collinsella	k__Bacteria.p__Chloroflexi.c__Anaerolineae.o__Anaerolineales.f__Anaerolineaceae.g__Thermanaerothrix
k__Bacteria.p__Proteobacteria.c__Alphaproteobacteria.o__Caulobacterales.f__Caulobacteraceae.g__Brevundimonas	k__Bacteria.p__Firmicutes.c__Bacilli.o__Bacillales.f__Bacillaceae.g__Anaerobacillus
k__Bacteria.p__Proteobacteria.c__Gammaproteobacteria.o__Alteromonadales.f__Alteromonadaceae.g__Aliiglaciecola	k__Bacteria.p__Actinobacteria.c__Actinobacteria.o__Pseudonocardiales.f__Pseudonocardiaceae.g__Prauserella
k__Bacteria.p__Bacteroidetes.c__Cytophagia.o__Cytophagales.f__Cytophagaceae.g__Anditalea	k__Bacteria.p__Firmicutes.c__Bacilli.o__Bacillales.f__Thermoactinomycetaceae.g__Desmospora
k__Bacteria.p__Actinobacteria.c__Actinobacteria.o__Micrococcales.f__Microbacteriaceae.g__Clavibacter	k__Bacteria.p__Bacteroidetes.c__Cytophagia.o__Cytophagales.f__Hymenobacteraceae.g__Hymenobacter
k__Bacteria.p__Proteobacteria.c__Gammaproteobacteria.o__Nevskiales.f__Sinobacteraceae.g__Polycyclovorans	k__Bacteria.p__Firmicutes.c__Erysipelotrichia.o__Erysipelotrichales.f__Erysipelotrichaceae.g__Kandleria
k__Bacteria.p__Bacteroidetes.c__Flavobacteriia.o__Flavobacteriales.f__Flavobacteriaceae.g__Epilithonimonas	k__Bacteria.p__Actinobacteria.c__Actinobacteria.o__Propionibacteriales.f__Nocardioidaceae.g__Actinopolymorpha
k__Bacteria.p__Actinobacteria.c__Actinobacteria.o__Bifidobacteriales.f__Bifidobacteriaceae.g__Gardnerella	k__Bacteria.p__Proteobacteria.c__Alphaproteobacteria.o__Rickettsiales.f__Candidatus_Paracaedibacteraceae.g__Candidatus_Paracaedibacter
k__Bacteria.p__Actinobacteria.c__Actinobacteria.o__Corynebacteriales.f__Corynebacteriaceae.g__Turicella	k__Bacteria.p__Proteobacteria.c__Alphaproteobacteria.o__Rickettsiales.f__Rickettsiaceae.g__Orientia
k__Bacteria.p__Proteobacteria.c__Alphaproteobacteria.o__Rhodobacterales.f__Rhodobacteraceae.g__Oceanicola	k__Bacteria.p__Proteobacteria.c__Alphaproteobacteria.o__Rhodobacterales.f__Rhodobacteraceae.g__Planktomarina
k__Bacteria.p__Deinococcus.Thermus.c__Deinococci.o__Thermales.f__Thermaceae.g__Meiothermus	k__Bacteria.p__Proteobacteria.c__Gammaproteobacteria.o__Pseudomonadales.f__Moraxellaceae.g__Perlucidibaca
k__Bacteria.p__Firmicutes.c__Negativicutes.o__Acidaminococcales.f__Acidaminococcaceae.g__Phascolarctobacterium	k__Bacteria.p__Fibrobacteres.c__Chitinivibrionia.o__Chitinivibrionales.f__Chitinivibrionaceae.g__Chitinivibrio
k__Bacteria.p__Bacteroidetes.c__Sphingobacteriia.o__Sphingobacteriales.f__Sphingobacteriaceae.g__Arcticibacter	k__Bacteria.p__Deinococcus.Thermus.c__Deinococci.o__Thermales.f__Thermaceae.g__Meiothermus
k__Bacteria.p__Bacteroidetes.c__Cytophagia.o__Cytophagales.f__Cyclobacteriaceae.g__Echinicola	k__Bacteria.p__Proteobacteria.c__Alphaproteobacteria.o__Rhodospirillales.f__Rhodospirillaceae.g__Dongia
k__Bacteria.p__Actinobacteria.c__Coriobacteriia.o__Eggerthellales.f__Eggerthellaceae.g__Eggerthella	k__Bacteria.p__Proteobacteria.c__Betaproteobacteria.o__Burkholderiales.f__Comamonadaceae.g__Limnohabitans
k__Bacteria.p__Actinobacteria.c__Actinobacteria.o__Micrococcales.f__Micrococcaceae.g__Pseudoglutamicibacter	k__Bacteria.p__Cyanobacteria.o__Nostocales.f__Nostocaceae.g__Raphidiopsis
k__Bacteria.p__Bacteroidetes.c__Flavobacteriia.o__Flavobacteriales.f__Flavobacteriaceae.g__Altibacter	k__Bacteria.p__Spirochaetes.c__Spirochaetia.f__Leptospiraceae.g__Turneriella
k__Bacteria.p__Proteobacteria.c__Deltaproteobacteria.o__Myxococcales.f__Labilitrichaceae.g__Labilithrix	k__Bacteria.p__Proteobacteria.c__Betaproteobacteria.o__Neisseriales.f__Chromobacteriaceae.g__Gulbenkiania
k__Bacteria.p__Firmicutes.c__Clostridia.o__Clostridiales.f__Catabacteriaceae.g__Catabacter	k__Bacteria.p__Spirochaetes.c__Spirochaetia.o__Spirochaetales.f__Spirochaetaceae.g__Treponema
k__Archaea.p__Euryarchaeota.c__Thermoplasmata.o__Methanomassiliicoccales.f__Methanomassiliicoccaceae.g__Candidatus_Methanomethylophilus	k__Bacteria.p__Tenericutes.c__Mollicutes.o__Acholeplasmatales.f__Acholeplasmataceae.g__Candidatus_Phytoplasma
k__Archaea.p__Euryarchaeota.c__Halobacteria.o__Halobacteriales.f__Halobacteriaceae.g__Haloarcula	k__Bacteria.p__Cyanobacteria.o__Oscillatoriales.g__Nodosilinea
k__Archaea.p__Euryarchaeota.c__Methanobacteria.o__Methanobacteriales.f__Methanobacteriaceae.g__Methanothermobacter	k__Bacteria.p__Bacteroidetes.c__Cytophagia.o__Cytophagales.f__Hymenobacteraceae.g__Rufibacter
k__Bacteria.p__Bacteroidetes.c__Cytophagia.o__Cytophagales.f__Cytophagaceae.g__Fibrisoma	k__Bacteria.p__Actinobacteria.c__Actinobacteria.o__Actinomycetales.f__Actinomycetaceae.g__Actinotignum
k__Bacteria.p__Bacteroidetes.c__Flavobacteriia.o__Flavobacteriales.g__Candidatus_Sulcia	k__Bacteria.p__Proteobacteria.c__Gammaproteobacteria.o__Cellvibrionales.f__Halieaceae.g__Halioglobus
k__Bacteria.p__Firmicutes.c__Clostridia.o__Clostridiales.f__Peptococcaceae.g__Desulfosporosinus	k__Bacteria.p__Firmicutes.c__Bacilli.o__Bacillales.f__Paenibacillaceae.g__Thermobacillus
k__Bacteria.p__Proteobacteria.c__Betaproteobacteria.o__Burkholderiales.f__Burkholderiaceae.g__Caballeronia	k__Bacteria.p__Proteobacteria.c__Betaproteobacteria.o__Burkholderiales.f__Alcaligenaceae.g__Pelistega
k__Bacteria.p__Fibrobacteres.c__Chitinispirillia.o__Chitinispirillales.f__Chitinispirillaceae.g__Chitinispirillum	k__Bacteria.p__Actinobacteria.c__Actinobacteria.o__Corynebacteriales.f__Corynebacteriaceae.g__Turicella
k__Bacteria.p__Actinobacteria.c__Actinobacteria.o__Micrococcales.f__Micrococcaceae.g__Sinomonas	k__Bacteria.p__Proteobacteria.c__Gammaproteobacteria.o__Enterobacteriales.f__Enterobacteriaceae.g__Serratia
k__Bacteria.p__Proteobacteria.c__Alphaproteobacteria.o__Rhodobacterales.f__Rhodobacteraceae.g__Ruegeria	k__Bacteria.p__Actinobacteria.c__Actinobacteria.o__Pseudonocardiales.f__Pseudonocardiaceae.g__Allokutzneria
k__Bacteria.p__Proteobacteria.c__Gammaproteobacteria.o__Alteromonadales.f__Shewanellaceae.g__Shewanella	k__Bacteria.p__Firmicutes.c__Bacilli.o__Bacillales.f__Planococcaceae.g__Rummeliibacillus
k__Bacteria.p__Proteobacteria.c__Gammaproteobacteria.o__Enterobacteriales.f__Enterobacteriaceae.g__Serratia	k__Bacteria.p__Proteobacteria.c__Betaproteobacteria.o__Neisseriales.f__Chromobacteriaceae.g__Microvirgula
k__Bacteria.p__Proteobacteria.c__Betaproteobacteria.o__Burkholderiales.g__Tepidimonas	k__Bacteria.p__Bacteroidetes.c__Cytophagia.o__Cytophagales.f__Amoebophilaceae.g__Candidatus_Cardinium
k__Bacteria.p__Firmicutes.c__Negativicutes.g__Anaerosporomusa	k__Bacteria.p__Proteobacteria.c__Betaproteobacteria.o__Burkholderiales.f__Burkholderiaceae.g__Pandoraea
k__Bacteria.p__Proteobacteria.c__Gammaproteobacteria.o__Alteromonadales.f__Pseudoalteromonadaceae.g__Pseudoalteromonas	k__Bacteria.p__Firmicutes.c__Clostridia.o__Clostridiales.f__Syntrophomonadaceae.g__Syntrophomonas
k__Bacteria.p__Bacteroidetes.c__Cytophagia.o__Cytophagales.f__Cyclobacteriaceae.g__Nitritalea	k__Bacteria.p__Firmicutes.c__Negativicutes.o__Veillonellales.f__Veillonellaceae.g__Megasphaera
k__Bacteria.p__Firmicutes.c__Negativicutes.o__Veillonellales.f__Veillonellaceae.g__Veillonella	k__Bacteria.p__Proteobacteria.c__Alphaproteobacteria.o__Rickettsiales.f__Anaplasmataceae.g__Wolbachia
k__Bacteria.p__Firmicutes.c__Bacilli.o__Bacillales.f__Bacillaceae.g__Gracilibacillus	k__Bacteria.p__Firmicutes.c__Bacilli.o__Lactobacillales.f__Carnobacteriaceae.g__Alkalibacterium
k__Bacteria.p__Proteobacteria.c__Gammaproteobacteria.o__Chromatiales.f__Ectothiorhodospiraceae.g__Nitrococcus	k__Bacteria.p__Proteobacteria.c__Betaproteobacteria.g__Kinetoplastibacterium
k__Bacteria.p__Proteobacteria.c__Alphaproteobacteria.o__Rhizobiales.f__Bradyrhizobiaceae.g__Rhodopseudomonas	k__Bacteria.p__Proteobacteria.c__Alphaproteobacteria.o__Sphingomonadales.f__Sphingomonadaceae.g__Blastomonas
k__Bacteria.p__Proteobacteria.c__Gammaproteobacteria.o__Legionellales.f__Coxiellaceae.g__Diplorickettsia	k__Bacteria.p__Actinobacteria.c__Actinobacteria.o__Micrococcales.f__Dermacoccaceae.g__Kytococcus
k__Bacteria.p__Proteobacteria.c__Deltaproteobacteria.o__Desulfuromonadales.f__Desulfuromonadaceae.g__Desulfuromonas	k__Bacteria.p__Firmicutes.c__Bacilli.o__Bacillales.g__Gemella
k__Archaea.p__Euryarchaeota.c__Methanomicrobia.o__Methanocellales.f__Methanocellaceae.g__Methanocella	k__Bacteria.p__Proteobacteria.c__Deltaproteobacteria.o__Bdellovibrionales.f__Bdellovibrionaceae.g__Bdellovibrio
k__Bacteria.p__Tenericutes.c__Mollicutes.o__Entomoplasmatales.f__Spiroplasmataceae.g__Spiroplasma	k__Bacteria.p__Proteobacteria.c__Gammaproteobacteria.o__Xanthomonadales.f__Xanthomonadaceae.g__Luteimonas
k__Bacteria.p__Proteobacteria.c__Epsilonproteobacteria.g__Sulfurovum	k__Bacteria.p__Proteobacteria.c__Betaproteobacteria.o__Neisseriales.f__Chromobacteriaceae.g__Pseudogulbenkiania
k__Bacteria.p__Proteobacteria.c__Gammaproteobacteria.o__Enterobacteriales.f__Enterobacteriaceae.g__Candidatus_Tachikawaea	k__Bacteria.p__Deinococcus.Thermus.c__Deinococci.o__Deinococcales.f__Trueperaceae.g__Truepera
k__Bacteria.p__Proteobacteria.c__Alphaproteobacteria.o__Rhizobiales.f__Bradyrhizobiaceae.g__Oligotropha	k__Bacteria.p__Proteobacteria.c__Betaproteobacteria.o__Neisseriales.f__Neisseriaceae.g__Vitreoscilla
k__Bacteria.p__Proteobacteria.c__Gammaproteobacteria.o__Enterobacteriales.f__Enterobacteriaceae.g__Mangrovibacter	k__Bacteria.p__Proteobacteria.c__Alphaproteobacteria.o__Rhizobiales.f__Bradyrhizobiaceae.g__Bradyrhizobium
k__Bacteria.p__Proteobacteria.c__Deltaproteobacteria.o__Desulfovibrionales.f__Desulfonatronaceae.g__Desulfonatronum	k__Bacteria.p__Proteobacteria.c__Deltaproteobacteria.o__Desulfuromonadales.f__Desulfuromonadaceae.g__Desulfuromonas
k__Bacteria.p__Cyanobacteria.o__Oscillatoriales.g__Moorea	k__Bacteria.p__Proteobacteria.c__Gammaproteobacteria.o__Alteromonadales.f__Alteromonadaceae.g__Alishewanella
k__Bacteria.p__Proteobacteria.c__Alphaproteobacteria.o__Rhodospirillales.f__Rhodospirillaceae.g__Pararhodospirillum	k__Bacteria.p__Proteobacteria.c__Gammaproteobacteria.o__Enterobacteriales.f__Enterobacteriaceae.g__Leclercia
k__Bacteria.p__Proteobacteria.c__Betaproteobacteria.o__Burkholderiales.f__Burkholderiaceae.g__Burkholderia	k__Bacteria.p__Proteobacteria.c__Alphaproteobacteria.o__Rhizobiales.f__Rhodobiaceae.g__Amorphus
k__Bacteria.p__Bacteroidetes.c__Cytophagia.o__Cytophagales.f__Flammeovirgaceae.g__Cesiribacter	k__Bacteria.p__Proteobacteria.c__Gammaproteobacteria.o__Nevskiales.f__Sinobacteraceae.g__Polycyclovorans
k__Archaea.p__Euryarchaeota.c__Methanomicrobia.o__Methanomicrobiales.f__Methanocorpusculaceae.g__Methanocorpusculum	k__Bacteria.p__Actinobacteria.c__Actinobacteria.o__Micrococcales.f__Micrococcaceae.g__Nesterenkonia
k__Bacteria.p__Tenericutes.c__Mollicutes.o__Acholeplasmatales.f__Acholeplasmataceae.g__Candidatus_Phytoplasma	k__Bacteria.p__Nitrospirae.c__Nitrospira.o__Nitrospirales.f__Nitrospiraceae.g__Candidatus_Magnetobacterium
k__Archaea.p__Euryarchaeota.c__Halobacteria.o__Natrialbales.f__Natrialbaceae.g__Natronolimnobius	k__Bacteria.p__Proteobacteria.c__Alphaproteobacteria.g__Candidatus_Puniceispirillum
k__Bacteria.p__Firmicutes.c__Bacilli.o__Bacillales.f__Bacillaceae.g__Caldalkalibacillus	k__Bacteria.p__Proteobacteria.c__Gammaproteobacteria.o__Enterobacteriales.f__Enterobacteriaceae.g__Phaseolibacter
k__Bacteria.p__Proteobacteria.c__Gammaproteobacteria.g__Ignatzschineria	k__Bacteria.p__Bacteroidetes.c__Flavobacteriia.o__Flavobacteriales.f__Flavobacteriaceae.g__Bergeyella
k__Bacteria.p__Proteobacteria.c__Gammaproteobacteria.o__Thiotrichales.f__Thiotrichaceae.g__Beggiatoa	k__Bacteria.p__Proteobacteria.c__Gammaproteobacteria.o__Salinisphaerales.f__Salinisphaeraceae.g__Salinisphaera
k__Bacteria.p__Actinobacteria.c__Actinobacteria.o__Kineosporiales.f__Kineosporiaceae.g__Kineococcus	k__Bacteria.p__Actinobacteria.c__Actinobacteria.o__Micrococcales.f__Microbacteriaceae.g__Gryllotalpicola
k__Bacteria.p__Bacteroidetes.c__Flavobacteriia.o__Flavobacteriales.f__Flavobacteriaceae.g__Aquimarina	k__Bacteria.p__Proteobacteria.c__Gammaproteobacteria.o__Nevskiales.f__Algiphilaceae.g__Algiphilus
k__Archaea.p__Crenarchaeota.c__Thermoprotei.o__Desulfurococcales.f__Desulfurococcaceae.g__Staphylothermus	k__Bacteria.p__Bacteroidetes.c__Cytophagia.o__Cytophagales.f__Cyclobacteriaceae.g__Indibacter
k__Archaea.p__Crenarchaeota.c__Thermoprotei.o__Acidilobales.f__Caldisphaeraceae.g__Caldisphaera	k__Bacteria.p__Proteobacteria.c__Gammaproteobacteria.o__Oceanospirillales.f__Oceanospirillaceae.g__Neptunomonas
k__Bacteria.p__Actinobacteria.c__Actinobacteria.o__Micrococcales.f__Microbacteriaceae.g__Frondihabitans	k__Bacteria.p__Proteobacteria.c__Alphaproteobacteria.o__Rhodospirillales.f__Acetobacteraceae.g__Acidocella
k__Bacteria.p__Actinobacteria.c__Actinobacteria.o__Micromonosporales.f__Micromonosporaceae.g__Salinispora	k__Bacteria.p__Proteobacteria.c__Acidithiobacillia.o__Acidithiobacillales.f__Acidithiobacillaceae.g__Acidithiobacillus
k__Bacteria.p__Actinobacteria.c__Actinobacteria.o__Micrococcales.f__Micrococcaceae.g__Pseudarthrobacter	k__Bacteria.p__Proteobacteria.c__Alphaproteobacteria.o__Rhodobacterales.f__Rhodobacteraceae.g__Pelagibaca
k__Bacteria.p__Proteobacteria.c__Betaproteobacteria.o__Burkholderiales.f__Burkholderiaceae.g__Paraburkholderia	k__Bacteria.p__Proteobacteria.c__Epsilonproteobacteria.g__Sulfurovum
k__Archaea.p__Euryarchaeota.c__Methanobacteria.o__Methanobacteriales.f__Methanobacteriaceae.g__Methanosphaera	k__Bacteria.p__Actinobacteria.c__Actinobacteria.o__Bifidobacteriales.f__Bifidobacteriaceae.g__Gardnerella
k__Bacteria.p__Proteobacteria.c__Gammaproteobacteria.o__Alteromonadales.f__Colwelliaceae.g__Thalassotalea	k__Bacteria.p__Firmicutes.c__Clostridia.o__Clostridiales.f__Lachnospiraceae.g__Cellulosilyticum
k__Bacteria.p__Proteobacteria.c__Gammaproteobacteria.o__Enterobacteriales.f__Enterobacteriaceae.g__Morganella	k__Bacteria.p__Bacteroidetes.c__Flavobacteriia.o__Flavobacteriales.f__Flavobacteriaceae.g__Xanthomarina
k__Bacteria.p__Firmicutes.c__Erysipelotrichia.o__Erysipelotrichales.f__Erysipelotrichaceae.g__Erysipelothrix	k__Bacteria.p__Chloroflexi.c__Ardenticatenia.o__Ardenticatenales.f__Ardenticatenaceae.g__Ardenticatena
k__Bacteria.p__Spirochaetes.c__Spirochaetia.o__Spirochaetales.f__Borreliaceae.g__Borrelia	k__Bacteria.p__Bacteroidetes.c__Flavobacteriia.o__Flavobacteriales.f__Flavobacteriaceae.g__Lutibacter
k__Bacteria.p__Planctomycetes.c__Planctomycetia.o__Planctomycetales.f__Isosphaeraceae.g__Isosphaera	k__Bacteria.p__Tenericutes.c__Mollicutes.o__Entomoplasmatales.f__Entomoplasmataceae.g__Mesoplasma
k__Bacteria.p__Proteobacteria.c__Alphaproteobacteria.o__Rhodobacterales.f__Rhodobacteraceae.g__Shimia	k__Bacteria.p__Firmicutes.c__Clostridia.o__Clostridiales.f__Clostridiaceae.g__Fervidicella
k__Bacteria.p__Firmicutes.c__Bacilli.o__Bacillales.f__Planococcaceae.g__Planococcus	k__Bacteria.p__Aquificae.c__Aquificae.o__Desulfurobacteriales.f__Desulfurobacteriaceae.g__Desulfurobacterium
k__Bacteria.p__Firmicutes.c__Bacilli.o__Bacillales.g__Acidibacillus	k__Bacteria.p__Firmicutes.c__Bacilli.o__Lactobacillales.f__Lactobacillaceae.g__Lactobacillus
k__Bacteria.p__Proteobacteria.c__Gammaproteobacteria.o__Enterobacteriales.f__Enterobacteriaceae.g__Kluyvera	k__Bacteria.p__Proteobacteria.c__Betaproteobacteria.o__Rhodocyclales.f__Rhodocyclaceae.g__Azonexus
k__Bacteria.p__Proteobacteria.c__Betaproteobacteria.o__Neisseriales.f__Chromobacteriaceae.g__Aquitalea	k__Bacteria.p__Proteobacteria.c__Alphaproteobacteria.o__Sphingomonadales.f__Sphingomonadaceae.g__Sphingomonas
k__Bacteria.p__Firmicutes.c__Clostridia.o__Clostridiales.f__Syntrophomonadaceae.g__Dethiobacter	k__Bacteria.p__Proteobacteria.c__Betaproteobacteria.o__Burkholderiales.g__Xylophilus
k__Bacteria.p__Bacteroidetes.c__Bacteroidia.o__Bacteroidales.f__Rikenellaceae.g__Rikenella	k__Archaea.p__Euryarchaeota.c__Methanomicrobia.o__Methanosarcinales.f__Methanosarcinaceae.g__Methanomethylovorans
k__Bacteria.p__Firmicutes.c__Erysipelotrichia.o__Erysipelotrichales.f__Erysipelotrichaceae.g__Erysipelatoclostridium	k__Bacteria.p__Bacteroidetes.c__Bacteroidia.o__Bacteroidales.f__Marinifilaceae.g__Marinifilum
k__Bacteria.p__Cyanobacteria.o__Nostocales.f__Rivulariaceae.g__Calothrix	k__Bacteria.p__Verrucomicrobia.c__Verrucomicrobiae.o__Verrucomicrobiales.f__Verrucomicrobiaceae.g__Verrucomicrobium
k__Bacteria.p__Proteobacteria.c__Betaproteobacteria.o__Rhodocyclales.f__Rhodocyclaceae.g__Uliginosibacterium	k__Bacteria.p__Proteobacteria.c__Alphaproteobacteria.o__Rhizobiales.f__Brucellaceae.g__Brucella
k__Bacteria.p__Actinobacteria.c__Actinobacteria.o__Propionibacteriales.f__Nocardioidaceae.g__Marmoricola	k__Bacteria.p__Bacteroidetes.c__Bacteroidia.o__Bacteroidales.f__Rikenellaceae.g__Mucinivorans
k__Bacteria.p__Bacteroidetes.c__Cytophagia.o__Cytophagales.f__Flammeovirgaceae.g__Fulvivirga	k__Bacteria.p__Bacteroidetes.c__Bacteroidia.o__Bacteroidales.g__Candidatus_Azobacteroides
k__Bacteria.p__Chloroflexi.c__Chloroflexia.o__Chloroflexales.f__Roseiflexaceae.g__Roseiflexus	k__Bacteria.p__Bacteroidetes.c__Flavobacteriia.o__Flavobacteriales.f__Flavobacteriaceae.g__Cellulophaga
k__Bacteria.p__Proteobacteria.c__Betaproteobacteria.o__Neisseriales.f__Chromobacteriaceae.g__Vogesella	k__Bacteria.p__Proteobacteria.c__Deltaproteobacteria.o__Myxococcales.f__Myxococcaceae.g__Myxococcus
k__Bacteria.p__Proteobacteria.c__Alphaproteobacteria.o__Rhodobacterales.f__Rhodobacteraceae.g__Falsirhodobacter	k__Bacteria.p__Aquificae.c__Aquificae.o__Aquificales.f__Aquificaceae.g__Aquifex
k__Bacteria.p__Firmicutes.c__Clostridia.o__Clostridiales.f__Eubacteriaceae.g__Pseudoramibacter	k__Bacteria.p__Proteobacteria.c__Gammaproteobacteria.o__Enterobacteriales.f__Enterobacteriaceae.g__Lelliottia
k__Bacteria.p__Proteobacteria.c__Gammaproteobacteria.o__Oceanospirillales.f__Saccharospirillaceae.g__Reinekea	k__Bacteria.p__Proteobacteria.c__Betaproteobacteria.o__Burkholderiales.f__Alcaligenaceae.g__Oligella
k__Bacteria.p__Proteobacteria.c__Alphaproteobacteria.o__Rhodobacterales.f__Hyphomonadaceae.g__Robiginitomaculum	k__Bacteria.p__Proteobacteria.c__Gammaproteobacteria.o__Alteromonadales.f__Alteromonadaceae.g__Alteromonas
k__Bacteria.p__Firmicutes.c__Clostridia.o__Clostridiales.f__Peptostreptococcaceae.g__Peptoclostridium	k__Bacteria.p__Proteobacteria.c__Betaproteobacteria.o__Burkholderiales.f__Alcaligenaceae.g__Derxia
k__Bacteria.p__Tenericutes.c__Mollicutes.o__Entomoplasmatales.f__Entomoplasmataceae.g__Mesoplasma	k__Bacteria.p__Proteobacteria.c__Gammaproteobacteria.o__Oceanospirillales.f__Saccharospirillaceae.g__Gynuella
k__Bacteria.p__Proteobacteria.c__Epsilonproteobacteria.o__Nautiliales.f__Nautiliaceae.g__Caminibacter	k__Bacteria.p__Cyanobacteria.o__Chroococcales.g__Microcystis
k__Bacteria.p__Proteobacteria.c__Alphaproteobacteria.o__Rhizobiales.f__Rhizobiaceae.g__Sinorhizobium	k__Bacteria.p__Bacteroidetes.c__Cytophagia.o__Cytophagales.f__Cyclobacteriaceae.g__Belliella
k__Bacteria.p__Verrucomicrobia.c__Verrucomicrobiae.o__Verrucomicrobiales.f__Akkermansiaceae.g__Akkermansia	k__Bacteria.p__Actinobacteria.c__Thermoleophilia.o__Solirubrobacterales.f__Solirubrobacteraceae.g__Solirubrobacter
k__Bacteria.p__Firmicutes.c__Tissierellia.o__Tissierellales.f__Peptoniphilaceae.g__Finegoldia	k__Bacteria.p__Proteobacteria.c__Betaproteobacteria.o__Rhodocyclales.f__Rhodocyclaceae.g__Sulfuritalea
k__Archaea.p__Euryarchaeota.c__Halobacteria.o__Halobacteriales.f__Halobacteriaceae.g__Natronomonas	k__Archaea.p__Crenarchaeota.c__Thermoprotei.o__Sulfolobales.f__Sulfolobaceae.g__Sulfolobus
k__Bacteria.p__Proteobacteria.c__Betaproteobacteria.o__Burkholderiales.f__Oxalobacteraceae.g__Massilia	k__Bacteria.p__Tenericutes.c__Mollicutes.o__Acholeplasmatales.f__Acholeplasmataceae.g__Acholeplasma
k__Bacteria.p__Proteobacteria.c__Alphaproteobacteria.o__Rhizobiales.f__Aurantimonadaceae.g__Fulvimarina	k__Bacteria.p__Actinobacteria.c__Actinobacteria.o__Micrococcales.f__Cellulomonadaceae.g__Actinotalea
k__Bacteria.p__Bacteroidetes.c__Cytophagia.o__Cytophagales.f__Amoebophilaceae.g__Candidatus_Amoebophilus	k__Bacteria.p__Proteobacteria.c__Gammaproteobacteria.g__Wohlfahrtiimonas
k__Bacteria.p__Tenericutes.c__Mollicutes.o__Acholeplasmatales.f__Acholeplasmataceae.g__Acholeplasma	k__Bacteria.p__Actinobacteria.c__Actinobacteria.o__Catenulisporales.f__Actinospicaceae.g__Actinospica
k__Bacteria.p__Proteobacteria.c__Alphaproteobacteria.o__Rhizobiales.f__Phyllobacteriaceae.g__Pseudaminobacter	k__Bacteria.p__Actinobacteria.c__Actinobacteria.o__Pseudonocardiales.f__Pseudonocardiaceae.g__Actinosynnema
k__Bacteria.p__Proteobacteria.c__Gammaproteobacteria.o__Enterobacteriales.f__Enterobacteriaceae.g__Phaseolibacter	k__Bacteria.p__Firmicutes.c__Clostridia.o__Clostridiales.g__Intestinimonas
k__Bacteria.p__Bacteroidetes.c__Flavobacteriia.o__Flavobacteriales.f__Flavobacteriaceae.g__Salinimicrobium	k__Bacteria.p__Bacteroidetes.c__Flavobacteriia.o__Flavobacteriales.f__Flavobacteriaceae.g__Tamlana
k__Bacteria.p__Bacteroidetes.c__Bacteroidia.o__Bacteroidales.f__Prolixibacteraceae.g__Draconibacterium	k__Bacteria.p__Proteobacteria.c__Deltaproteobacteria.o__Desulfarculales.f__Desulfarculaceae.g__Desulfarculus
k__Bacteria.p__Firmicutes.c__Bacilli.o__Lactobacillales.f__Aerococcaceae.g__Abiotrophia	k__Bacteria.p__Firmicutes.c__Bacilli.o__Bacillales.f__Bacillaceae.g__Fictibacillus
k__Bacteria.p__Proteobacteria.c__Gammaproteobacteria.o__Enterobacteriales.f__Enterobacteriaceae.g__Dickeya	k__Bacteria.p__Firmicutes.c__Clostridia.o__Clostridiales.f__Lachnospiraceae.g__Dorea
k__Bacteria.p__Proteobacteria.c__Alphaproteobacteria.o__Rhodospirillales.g__Reyranella	k__Bacteria.p__Fusobacteria.c__Fusobacteriia.o__Fusobacteriales.f__Fusobacteriaceae.g__Cetobacterium
k__Bacteria.p__Bacteroidetes.c__Cytophagia.o__Cytophagales.f__Cyclobacteriaceae.g__Belliella	k__Bacteria.p__Firmicutes.c__Negativicutes.o__Selenomonadales.f__Sporomusaceae.g__Anaeromusa
k__Bacteria.p__Proteobacteria.c__Alphaproteobacteria.o__Rhodobacterales.f__Rhodobacteraceae.g__Rhodovulum	k__Bacteria.p__Proteobacteria.c__Gammaproteobacteria.o__Enterobacteriales.f__Enterobacteriaceae.g__Enterobacter
k__Bacteria.p__Firmicutes.c__Clostridia.o__Halanaerobiales.f__Halanaerobiaceae.g__Halanaerobium	k__Bacteria.p__Thermotogae.c__Thermotogae.o__Thermotogales.f__Thermotogaceae.g__Thermotoga
k__Bacteria.p__Actinobacteria.c__Actinobacteria.o__Micromonosporales.f__Micromonosporaceae.g__Actinocatenispora	k__Bacteria.p__Proteobacteria.c__Gammaproteobacteria.o__Cellvibrionales.f__Cellvibrionaceae.g__Simiduia
k__Bacteria.p__Proteobacteria.c__Alphaproteobacteria.o__Rhodobacterales.f__Rhodobacteraceae.g__Aestuariivita	k__Bacteria.p__Firmicutes.c__Clostridia.o__Clostridiales.g__Flavonifractor
k__Bacteria.p__Actinobacteria.c__Actinobacteria.o__Pseudonocardiales.f__Pseudonocardiaceae.g__Actinosynnema	k__Archaea.p__Euryarchaeota.c__Methanococci.o__Methanococcales.f__Methanococcaceae.g__Methanothermococcus
k__Archaea.p__Euryarchaeota.c__Halobacteria.o__Natrialbales.f__Natrialbaceae.g__Natronobacterium	k__Bacteria.p__Proteobacteria.c__Alphaproteobacteria.o__Rhodospirillales.f__Rhodospirillaceae.g__Niveispirillum
k__Bacteria.p__Proteobacteria.c__Gammaproteobacteria.o__Alteromonadales.f__Alteromonadaceae.g__Aliagarivorans	k__Bacteria.p__Proteobacteria.c__Betaproteobacteria.o__Neisseriales.f__Neisseriaceae.g__Stenoxybacter
k__Bacteria.p__Bacteroidetes.c__Cytophagia.o__Cytophagales.f__Cytophagaceae.g__Leadbetterella	k__Bacteria.p__Cyanobacteria.o__Pleurocapsales.g__Myxosarcina
k__Bacteria.p__Proteobacteria.c__Betaproteobacteria.o__Methylophilales.f__Methylophilaceae.g__Methylotenera	k__Bacteria.p__Bacteroidetes.c__Cytophagia.o__Cytophagales.f__Cyclobacteriaceae.g__Cecembia
k__Bacteria.p__Nitrospirae.c__Nitrospira.o__Nitrospirales.f__Nitrospiraceae.g__Leptospirillum	k__Bacteria.p__Proteobacteria.c__Betaproteobacteria.o__Nitrosomonadales.f__Nitrosomonadaceae.g__Nitrosomonas
k__Bacteria.p__Fusobacteria.c__Fusobacteriia.o__Fusobacteriales.f__Leptotrichiaceae.g__Sneathia	k__Bacteria.p__Proteobacteria.c__Gammaproteobacteria.o__Methylococcales.f__Methylococcaceae.g__Methylosarcina
k__Bacteria.p__Proteobacteria.c__Betaproteobacteria.o__Burkholderiales.f__Burkholderiaceae.g__Limnobacter	k__Bacteria.p__Proteobacteria.c__Gammaproteobacteria.g__Pseudohongiella
k__Bacteria.p__Proteobacteria.c__Gammaproteobacteria.o__Enterobacteriales.f__Enterobacteriaceae.g__Providencia	k__Bacteria.p__Actinobacteria.c__Coriobacteriia.o__Eggerthellales.f__Eggerthellaceae.g__Adlercreutzia
k__Bacteria.p__Proteobacteria.c__Alphaproteobacteria.o__Rhizobiales.f__Hyphomicrobiaceae.g__Maritalea	k__Bacteria.p__Proteobacteria.c__Betaproteobacteria.o__Neisseriales.f__Chromobacteriaceae.g__Chitinilyticum
k__Bacteria.p__Actinobacteria.c__Actinobacteria.o__Corynebacteriales.f__Nocardiaceae.g__Rhodococcus	k__Bacteria.p__Actinobacteria.c__Actinobacteria.o__Streptomycetales.f__Streptomycetaceae.g__Streptacidiphilus
k__Bacteria.p__Proteobacteria.c__Alphaproteobacteria.o__Rhodobacterales.f__Rhodobacteraceae.g__Wenxinia	k__Bacteria.p__Actinobacteria.c__Actinobacteria.o__Micrococcales.f__Brevibacteriaceae.g__Brevibacterium
k__Bacteria.p__Proteobacteria.c__Alphaproteobacteria.o__Rhizobiales.f__Phyllobacteriaceae.g__Chelativorans	k__Bacteria.p__Actinobacteria.c__Actinobacteria.o__Micrococcales.f__Microbacteriaceae.g__Glaciibacter
k__Bacteria.p__Bacteroidetes.c__Flavobacteriia.o__Flavobacteriales.f__Schleiferiaceae.g__Schleiferia	k__Bacteria.p__Proteobacteria.c__Gammaproteobacteria.o__Oceanospirillales.f__Oceanospirillaceae.g__Oceanobacter
k__Bacteria.p__Proteobacteria.c__Gammaproteobacteria.o__Enterobacteriales.f__Enterobacteriaceae.g__Pectobacterium	k__Bacteria.p__Firmicutes.c__Clostridia.o__Clostridiales.f__Peptostreptococcaceae.g__Intestinibacter
k__Bacteria.p__Proteobacteria.c__Alphaproteobacteria.o__Pelagibacterales.f__Pelagibacteraceae.g__Candidatus_Pelagibacter	k__Bacteria.p__Proteobacteria.c__Alphaproteobacteria.o__Rhizobiales.f__Rhizobiaceae.g__Neorhizobium
k__Bacteria.p__Proteobacteria.c__Betaproteobacteria.o__Burkholderiales.g__Roseateles	k__Bacteria.p__Proteobacteria.c__Gammaproteobacteria.o__Oceanospirillales.f__Halomonadaceae.g__Kushneria
k__Bacteria.p__Firmicutes.c__Bacilli.o__Bacillales.f__Staphylococcaceae.g__Staphylococcus	k__Bacteria.p__Proteobacteria.c__Alphaproteobacteria.o__Rhizobiales.f__Methylobacteriaceae.g__Methylobacterium
k__Bacteria.p__Proteobacteria.c__Betaproteobacteria.o__Burkholderiales.f__Comamonadaceae.g__Limnohabitans	k__Bacteria.p__Firmicutes.c__Negativicutes.o__Selenomonadales.f__Sporomusaceae.g__Thermosinus
k__Bacteria.p__Proteobacteria.c__Deltaproteobacteria.o__Desulfobacterales.f__Desulfobacteraceae.g__Desulfospira	k__Bacteria.p__Proteobacteria.c__Betaproteobacteria.o__Burkholderiales.f__Burkholderiaceae.g__Lautropia
k__Bacteria.p__Proteobacteria.c__Alphaproteobacteria.o__Rhodobacterales.f__Rhodobacteraceae.g__Maribius	k__Bacteria.p__Firmicutes.c__Limnochordia.o__Limnochordales.f__Limnochordaceae.g__Limnochorda
k__Bacteria.p__Proteobacteria.c__Betaproteobacteria.o__Neisseriales.f__Neisseriaceae.g__Simonsiella	k__Bacteria.p__Actinobacteria.c__Actinobacteria.o__Micrococcales.f__Microbacteriaceae.g__Microterricola
k__Bacteria.p__Actinobacteria.c__Actinobacteria.o__Micrococcales.f__Micrococcaceae.g__Glutamicibacter	k__Bacteria.p__Proteobacteria.c__Betaproteobacteria.o__Burkholderiales.f__Burkholderiaceae.g__Polynucleobacter
k__Bacteria.p__Planctomycetes.c__Planctomycetia.o__Planctomycetales.f__Planctomycetaceae.g__Schlesneria	k__Bacteria.p__Proteobacteria.c__Deltaproteobacteria.o__Desulfovibrionales.f__Desulfonatronaceae.g__Desulfonatronum
k__Bacteria.p__Firmicutes.c__Bacilli.o__Lactobacillales.f__Leuconostocaceae.g__Fructobacillus	k__Bacteria.p__Proteobacteria.c__Gammaproteobacteria.o__Enterobacteriales.f__Enterobacteriaceae.g__Buttiauxella
k__Bacteria.p__Proteobacteria.c__Alphaproteobacteria.o__Rhodobacterales.f__Hyphomonadaceae.g__Oceanicaulis	k__Bacteria.p__Proteobacteria.c__Alphaproteobacteria.o__Rickettsiales.g__Candidatus_Hepatobacter
k__Bacteria.p__Proteobacteria.c__Deltaproteobacteria.o__Desulfobacterales.f__Desulfobacteraceae.g__Desulfobacterium	k__Bacteria.p__Cyanobacteria.o__Chroococcales.g__Dactylococcopsis
k__Bacteria.p__Proteobacteria.c__Deltaproteobacteria.o__Desulfobacterales.f__Desulfobulbaceae.g__Desulfobulbus	k__Bacteria.p__Proteobacteria.c__Gammaproteobacteria.o__Methylococcales.f__Methylococcaceae.g__Methylovulum
k__Bacteria.p__Firmicutes.c__Bacilli.o__Lactobacillales.f__Lactobacillaceae.g__Sharpea	k__Bacteria.p__Proteobacteria.c__Alphaproteobacteria.o__Rhodobacterales.f__Rhodobacteraceae.g__Rhodovulum
k__Bacteria.p__Chlamydiae.c__Chlamydiia.o__Chlamydiales.f__Parachlamydiaceae.g__Parachlamydia	k__Bacteria.p__Firmicutes.c__Erysipelotrichia.o__Erysipelotrichales.f__Erysipelotrichaceae.g__Faecalibaculum
k__Bacteria.p__Thermodesulfobacteria.c__Thermodesulfobacteria.o__Thermodesulfobacteriales.f__Thermodesulfobacteriaceae.g__Thermosulfurimonas	k__Bacteria.p__Proteobacteria.c__Betaproteobacteria.o__Neisseriales.f__Neisseriaceae.g__Morococcus
k__Bacteria.p__Proteobacteria.c__Gammaproteobacteria.o__Enterobacteriales.f__Enterobacteriaceae.g__Sodalis	k__Bacteria.p__Actinobacteria.c__Actinobacteria.o__Bifidobacteriales.f__Bifidobacteriaceae.g__Scardovia
k__Bacteria.p__Actinobacteria.c__Actinobacteria.o__Streptosporangiales.f__Streptosporangiaceae.g__Nonomuraea	k__Bacteria.p__Proteobacteria.c__Alphaproteobacteria.g__Thermopetrobacter
k__Bacteria.p__Proteobacteria.c__Betaproteobacteria.o__Methylophilales.f__Methylophilaceae.g__Methylobacillus	k__Bacteria.p__Actinobacteria.c__Actinobacteria.o__Micrococcales.f__Cellulomonadaceae.g__Oerskovia
k__Bacteria.p__Proteobacteria.c__Deltaproteobacteria.o__Desulfovibrionales.f__Desulfohalobiaceae.g__Desulfohalobium	k__Bacteria.p__Firmicutes.c__Clostridia.o__Clostridiales.f__Catabacteriaceae.g__Catabacter
k__Bacteria.p__Bacteroidetes.c__Cytophagia.o__Cytophagales.f__Flammeovirgaceae.g__Flammeovirga	k__Bacteria.p__Firmicutes.c__Clostridia.o__Thermoanaerobacterales.f__Thermoanaerobacterales_Family_III._Incertae_Sedis.g__Caldicellulosiruptor
k__Archaea.p__Euryarchaeota.c__Methanobacteria.o__Methanobacteriales.f__Methanobacteriaceae.g__Methanobrevibacter	k__Bacteria.p__Firmicutes.c__Clostridia.o__Clostridiales.f__Syntrophomonadaceae.g__Dethiobacter
k__Bacteria.p__Firmicutes.c__Clostridia.o__Clostridiales.f__Peptococcaceae.g__Dehalobacter	k__Bacteria.p__Proteobacteria.c__Gammaproteobacteria.o__Alteromonadales.f__Alteromonadaceae.g__Lacimicrobium
k__Bacteria.p__Firmicutes.c__Clostridia.o__Clostridiales.f__Lachnospiraceae.g__Lachnoclostridium	k__Bacteria.p__Proteobacteria.c__Deltaproteobacteria.g__Candidatus_Babela
k__Bacteria.p__Actinobacteria.c__Actinobacteria.o__Micrococcales.f__Microbacteriaceae.g__Leucobacter	k__Bacteria.p__Proteobacteria.c__Gammaproteobacteria.o__Cellvibrionales.f__Cellvibrionaceae.g__Saccharophagus
k__Bacteria.p__Cyanobacteria.o__Pleurocapsales.g__Chroococcidiopsis	k__Bacteria.p__Proteobacteria.c__Gammaproteobacteria.o__Xanthomonadales.f__Xanthomonadaceae.g__Arenimonas
k__Bacteria.p__Bacteroidetes.c__Bacteroidia.o__Bacteroidales.f__Porphyromonadaceae.g__Fermentimonas	k__Bacteria.p__Firmicutes.c__Clostridia.o__Clostridiales.f__Ruminococcaceae.g__Ethanoligenens
k__Bacteria.p__Proteobacteria.c__Gammaproteobacteria.o__Xanthomonadales.f__Xanthomonadaceae.g__Silanimonas	k__Bacteria.p__Actinobacteria.c__Actinobacteria.o__Micrococcales.f__Intrasporangiaceae.g__Terracoccus
k__Bacteria.p__Cyanobacteria.o__Nostocales.f__Nostocaceae.g__Nostoc	k__Bacteria.p__Proteobacteria.c__Gammaproteobacteria.o__Enterobacteriales.f__Enterobacteriaceae.g__Franconibacter
k__Bacteria.p__Bacteroidetes.c__Cytophagia.o__Cytophagales.f__Cytophagaceae.g__Rhodonellum	k__Bacteria.p__Synergistetes.c__Synergistia.o__Synergistales.f__Synergistaceae.g__Thermanaerovibrio
k__Bacteria.p__Firmicutes.c__Tissierellia.o__Tissierellales.f__Peptoniphilaceae.g__Anaerococcus	k__Bacteria.p__Bacteroidetes.c__Sphingobacteriia.o__Sphingobacteriales.f__Sphingobacteriaceae.g__Arcticibacter
k__Bacteria.p__Proteobacteria.c__Gammaproteobacteria.o__Alteromonadales.f__Psychromonadaceae.g__Psychromonas	k__Bacteria.p__Proteobacteria.c__Gammaproteobacteria.o__Thiotrichales.f__Piscirickettsiaceae.g__Piscirickettsia
k__Bacteria.p__Bacteroidetes.c__Flavobacteriia.o__Flavobacteriales.f__Flavobacteriaceae.g__Arenitalea	k__Bacteria.p__Proteobacteria.c__Deltaproteobacteria.o__Desulfovibrionales.f__Desulfohalobiaceae.g__Desulfonatronospira
k__Bacteria.p__Actinobacteria.c__Actinobacteria.o__Micromonosporales.f__Micromonosporaceae.g__Longispora	k__Bacteria.p__Proteobacteria.c__Alphaproteobacteria.o__Rhodospirillales.f__Rhodospirillaceae.g__Rhodospirillum
k__Bacteria.p__Actinobacteria.c__Actinobacteria.o__Propionibacteriales.f__Propionibacteriaceae.g__Granulicoccus	k__Bacteria.p__Proteobacteria.c__Deltaproteobacteria.o__Myxococcales.f__Cystobacteraceae.g__Hyalangium
k__Bacteria.p__Proteobacteria.c__Gammaproteobacteria.o__Enterobacteriales.f__Enterobacteriaceae.g__Ewingella	k__Bacteria.p__Fusobacteria.c__Fusobacteriia.o__Fusobacteriales.f__Fusobacteriaceae.g__Psychrilyobacter
k__Bacteria.p__Proteobacteria.c__Betaproteobacteria.o__Burkholderiales.f__Alcaligenaceae.g__Azohydromonas	k__Bacteria.p__Chloroflexi.c__Thermomicrobia.o__Thermomicrobiales.f__Thermomicrobiaceae.g__Thermomicrobium
k__Bacteria.p__Firmicutes.c__Bacilli.o__Lactobacillales.f__Streptococcaceae.g__Lactococcus	k__Bacteria.p__Dictyoglomi.c__Dictyoglomia.o__Dictyoglomales.f__Dictyoglomaceae.g__Dictyoglomus
k__Archaea.p__Thaumarchaeota.c__Nitrososphaeria.o__Nitrososphaerales.f__Nitrososphaeraceae.g__Nitrososphaera	k__Bacteria.p__Proteobacteria.c__Betaproteobacteria.o__Burkholderiales.f__Burkholderiaceae.g__Caballeronia
k__Bacteria.p__Armatimonadetes.c__Chthonomonadetes.o__Chthonomonadales.f__Chthonomonadaceae.g__Chthonomonas	k__Bacteria.p__Actinobacteria.c__Actinobacteria.o__Streptosporangiales.f__Thermomonosporaceae.g__Spirillospora
k__Bacteria.p__Proteobacteria.c__Gammaproteobacteria.o__Alteromonadales.f__Ferrimonadaceae.g__Ferrimonas	k__Bacteria.p__Bacteroidetes.c__Sphingobacteriia.o__Sphingobacteriales.f__Sphingobacteriaceae.g__Pedobacter
k__Bacteria.p__Actinobacteria.c__Actinobacteria.o__Streptomycetales.f__Streptomycetaceae.g__Streptomyces	k__Bacteria.p__Proteobacteria.c__Gammaproteobacteria.o__Enterobacteriales.f__Enterobacteriaceae.g__Arsenophonus
k__Bacteria.p__Firmicutes.c__Bacilli.o__Bacillales.f__Thermoactinomycetaceae.g__Shimazuella	k__Bacteria.p__Firmicutes.c__Bacilli.o__Bacillales.f__Paenibacillaceae.g__Saccharibacillus
k__Bacteria.p__Cyanobacteria.o__Stigonematales.g__Fischerella	k__Bacteria.p__Actinobacteria.c__Actinobacteria.o__Propionibacteriales.f__Nocardioidaceae.g__Aeromicrobium
k__Bacteria.p__Cyanobacteria.o__Pleurocapsales.g__Aliterella	k__Bacteria.p__Actinobacteria.c__Actinobacteria.o__Micrococcales.f__Jonesiaceae.g__Jonesia
k__Bacteria.p__Actinobacteria.c__Actinobacteria.o__Micrococcales.f__Microbacteriaceae.g__Salinibacterium	k__Bacteria.p__Bacteroidetes.c__Cytophagia.o__Cytophagales.f__Flammeovirgaceae.g__Flexithrix
k__Bacteria.p__Proteobacteria.c__Gammaproteobacteria.o__Cellvibrionales.f__Halieaceae.g__Halioglobus	k__Bacteria.p__Proteobacteria.c__Gammaproteobacteria.o__Nevskiales.f__Sinobacteraceae.g__Hydrocarboniphaga
k__Bacteria.p__Proteobacteria.c__Betaproteobacteria.o__Neisseriales.f__Chromobacteriaceae.g__Chitiniphilus	k__Bacteria.p__Thermodesulfobacteria.c__Thermodesulfobacteria.o__Thermodesulfobacteriales.f__Thermodesulfobacteriaceae.g__Thermosulfurimonas
k__Bacteria.p__Firmicutes.c__Bacilli.o__Bacillales.f__Planococcaceae.g__Planomicrobium	k__Bacteria.p__Verrucomicrobia.c__Verrucomicrobiae.o__Verrucomicrobiales.f__Verrucomicrobia_subdivision_3.g__Pedosphaera
k__Bacteria.p__Proteobacteria.c__Gammaproteobacteria.o__Oceanospirillales.f__Alcanivoracaceae.g__Alcanivorax	k__Bacteria.p__Proteobacteria.c__Gammaproteobacteria.o__Nevskiales.f__Sinobacteraceae.g__Nevskia
k__Bacteria.p__Actinobacteria.c__Actinobacteria.o__Micrococcales.f__Intrasporangiaceae.g__Intrasporangium	k__Bacteria.p__Verrucomicrobia.c__Verrucomicrobiae.o__Verrucomicrobiales.f__Rubritaleaceae.g__Rubritalea
k__Bacteria.p__Proteobacteria.c__Betaproteobacteria.o__Neisseriales.f__Neisseriaceae.g__Crenobacter	k__Bacteria.p__Proteobacteria.c__Betaproteobacteria.o__Burkholderiales.f__Alcaligenaceae.g__Achromobacter
k__Bacteria.p__Firmicutes.c__Clostridia.o__Clostridiales.f__Lachnospiraceae.g__Oribacterium	k__Bacteria.p__Cyanobacteria.o__Oscillatoriales.g__Coleofasciculus
k__Bacteria.p__Proteobacteria.c__Alphaproteobacteria.o__Rhodobacterales.f__Hyphomonadaceae.g__Henriciella	k__Bacteria.p__Actinobacteria.c__Actinobacteria.o__Micrococcales.f__Microbacteriaceae.g__Pseudoclavibacter
k__Bacteria.p__Fusobacteria.c__Fusobacteriia.o__Fusobacteriales.f__Fusobacteriaceae.g__Fusobacterium	k__Bacteria.p__Firmicutes.c__Negativicutes.o__Selenomonadales.f__Selenomonadaceae.g__Selenomonas
k__Bacteria.p__Actinobacteria.c__Actinobacteria.o__Bifidobacteriales.f__Bifidobacteriaceae.g__Alloscardovia	k__Bacteria.p__Actinobacteria.c__Actinobacteria.o__Micrococcales.f__Micrococcaceae.g__Paenarthrobacter
k__Bacteria.p__Actinobacteria.c__Actinobacteria.o__Micromonosporales.f__Micromonosporaceae.g__Dactylosporangium	k__Bacteria.p__Spirochaetes.c__Spirochaetia.o__Spirochaetales.f__Spirochaetaceae.g__Salinispira
k__Bacteria.p__Actinobacteria.c__Actinobacteria.o__Micrococcales.f__Micrococcaceae.g__Acaricomes	k__Bacteria.p__Proteobacteria.c__Alphaproteobacteria.o__Rhodobacterales.f__Rhodobacteraceae.g__Loktanella
k__Bacteria.p__Proteobacteria.c__Alphaproteobacteria.o__Rhodobacterales.f__Rhodobacteraceae.g__Citreicella	k__Bacteria.p__Cyanobacteria.o__Nostocales.f__Microchaetaceae.g__Hassallia
k__Bacteria.p__Proteobacteria.c__Betaproteobacteria.o__Burkholderiales.f__Alcaligenaceae.g__Achromobacter	k__Bacteria.p__Deferribacteres.c__Deferribacteres.o__Deferribacterales.f__Deferribacteraceae.g__Caldithrix
k__Bacteria.p__Proteobacteria.c__Betaproteobacteria.o__Burkholderiales.f__Comamonadaceae.g__Candidatus_Symbiobacter	k__Bacteria.p__Proteobacteria.c__Alphaproteobacteria.o__Rhizobiales.f__Beijerinckiaceae.g__Methylocella
k__Bacteria.p__Ignavibacteriae.c__Ignavibacteria.o__Ignavibacteriales.f__Melioribacteraceae.g__Melioribacter	k__Bacteria.p__Actinobacteria.c__Actinobacteria.o__Jiangellales.f__Jiangellaceae.g__Jiangella
k__Bacteria.p__Proteobacteria.c__Alphaproteobacteria.o__Rhodobacterales.f__Rhodobacteraceae.g__Ahrensia	k__Bacteria.p__Bacteroidetes.c__Bacteroidia.o__Bacteroidales.f__Porphyromonadaceae.g__Parabacteroides
k__Bacteria.p__Proteobacteria.c__Gammaproteobacteria.o__Aeromonadales.f__Aeromonadaceae.g__Oceanimonas	k__Bacteria.p__Cyanobacteria.o__Chroococcales.g__Gloeocapsa
k__Bacteria.p__Firmicutes.c__Clostridia.o__Clostridiales.g__Pseudoflavonifractor	k__Bacteria.p__Actinobacteria.c__Actinobacteria.o__Micrococcales.f__Intrasporangiaceae.g__Arsenicicoccus
k__Bacteria.p__Firmicutes.c__Bacilli.o__Bacillales.f__Bacillaceae.g__Domibacillus	k__Bacteria.p__Firmicutes.c__Clostridia.o__Thermoanaerobacterales.f__Thermoanaerobacteraceae.g__Ammonifex
k__Bacteria.p__Actinobacteria.c__Actinobacteria.o__Micrococcales.f__Microbacteriaceae.g__Rathayibacter	k__Bacteria.p__Acidobacteria.c__Holophagae.o__Holophagales.f__Holophagaceae.g__Geothrix
k__Bacteria.p__Proteobacteria.c__Betaproteobacteria.o__Burkholderiales.g__Rhizobacter	k__Archaea.p__Euryarchaeota.c__Halobacteria.o__Natrialbales.f__Natrialbaceae.g__Natrinema
k__Bacteria.p__Proteobacteria.c__Gammaproteobacteria.o__Pasteurellales.f__Pasteurellaceae.g__Aggregatibacter	k__Bacteria.p__Proteobacteria.c__Alphaproteobacteria.o__Rhodospirillales.f__Acetobacteraceae.g__Asaia
k__Bacteria.p__Firmicutes.c__Bacilli.o__Lactobacillales.f__Carnobacteriaceae.g__Allofustis	k__Bacteria.p__Spirochaetes.c__Spirochaetia.o__Spirochaetales.f__Borreliaceae.g__Borrelia
k__Bacteria.p__Fusobacteria.c__Fusobacteriia.o__Fusobacteriales.f__Fusobacteriaceae.g__Cetobacterium	k__Bacteria.p__Proteobacteria.c__Gammaproteobacteria.o__Oceanospirillales.f__Saccharospirillaceae.g__Reinekea
k__Bacteria.p__Firmicutes.c__Clostridia.o__Halanaerobiales.f__Halobacteroidaceae.g__Acetohalobium	k__Bacteria.p__Spirochaetes.c__Spirochaetia.o__Brachyspirales.f__Brachyspiraceae.g__Brachyspira
k__Bacteria.p__Proteobacteria.c__Gammaproteobacteria.o__Oceanospirillales.f__Oceanospirillaceae.g__Oceanobacter	k__Bacteria.p__Firmicutes.c__Clostridia.o__Halanaerobiales.f__Halanaerobiaceae.g__Halanaerobium
k__Bacteria.p__Proteobacteria.c__Gammaproteobacteria.o__Legionellales.f__Legionellaceae.g__Legionella	k__Bacteria.p__Proteobacteria.c__Alphaproteobacteria.o__Caulobacterales.f__Caulobacteraceae.g__Caulobacter
k__Bacteria.p__Proteobacteria.c__Gammaproteobacteria.o__Cellvibrionales.f__Porticoccaceae.g__Porticoccus	k__Bacteria.p__Proteobacteria.c__Gammaproteobacteria.o__Xanthomonadales.f__Rhodanobacteraceae.g__Rhodanobacter
k__Bacteria.p__Verrucomicrobia.c__Opitutae.o__Opitutales.f__Opitutaceae.g__Diplosphaera	k__Bacteria.p__Firmicutes.c__Bacilli.o__Bacillales.f__Bacillaceae.g__Oceanobacillus
k__Bacteria.p__Proteobacteria.c__Gammaproteobacteria.o__Enterobacteriales.f__Enterobacteriaceae.g__Buchnera	k__Bacteria.p__Proteobacteria.c__Betaproteobacteria.o__Burkholderiales.g__Aquabacterium
k__Bacteria.p__Firmicutes.c__Negativicutes.o__Acidaminococcales.f__Acidaminococcaceae.g__Succinispira	k__Bacteria.p__Bacteroidetes.o__Bacteroidetes_Order_II._Incertae_sedis.f__Rhodothermaceae.g__Rhodothermus
k__Bacteria.p__Chlorobi.c__Chlorobia.o__Chlorobiales.f__Chlorobiaceae.g__Chlorobaculum	k__Bacteria.p__Proteobacteria.c__Deltaproteobacteria.o__Desulfuromonadales.f__Geobacteraceae.g__Geoalkalibacter
k__Bacteria.p__Proteobacteria.c__Gammaproteobacteria.o__Oceanospirillales.f__Oceanospirillaceae.g__Marinospirillum	k__Bacteria.p__Proteobacteria.c__Alphaproteobacteria.o__Rhodospirillales.f__Rhodospirillaceae.g__Tistrella
k__Bacteria.p__Fusobacteria.c__Fusobacteriia.o__Fusobacteriales.f__Leptotrichiaceae.g__Streptobacillus	k__Bacteria.p__Firmicutes.c__Clostridia.o__Clostridiales.f__Clostridiaceae.g__Youngiibacter
k__Bacteria.p__Proteobacteria.c__Alphaproteobacteria.o__Rhodobacterales.f__Rhodobacteraceae.g__Oceanibulbus	k__Archaea.p__Euryarchaeota.c__Thermoplasmata.o__Thermoplasmatales.f__Ferroplasmaceae.g__Acidiplasma
k__Bacteria.p__Proteobacteria.c__Betaproteobacteria.o__Burkholderiales.f__Comamonadaceae.g__Pelomonas	k__Bacteria.p__Actinobacteria.c__Actinobacteria.o__Micrococcales.f__Micrococcaceae.g__Kocuria
k__Archaea.p__Euryarchaeota.c__Halobacteria.o__Halobacteriales.f__Halobacteriaceae.g__Halorhabdus	k__Bacteria.p__Proteobacteria.c__Alphaproteobacteria.o__Rhizobiales.f__Phyllobacteriaceae.g__Mesorhizobium
k__Bacteria.p__Bacteroidetes.c__Cytophagia.o__Cytophagales.f__Thermonemataceae.g__Thermonema	k__Bacteria.p__Planctomycetes.c__Planctomycetia.o__Planctomycetales.f__Planctomycetaceae.g__Zavarzinella
k__Bacteria.p__Proteobacteria.c__Betaproteobacteria.o__Nitrosomonadales.f__Nitrosomonadaceae.g__Nitrosospira	k__Bacteria.p__Firmicutes.c__Bacilli.o__Bacillales.f__Staphylococcaceae.g__Staphylococcus
k__Bacteria.p__Bacteroidetes.c__Bacteroidia.o__Bacteroidales.f__Bacteroidaceae.g__Bacteroides	k__Bacteria.p__Firmicutes.c__Clostridia.o__Clostridiales.f__Lachnospiraceae.g__Butyrivibrio
k__Bacteria.p__Caldiserica.c__Caldisericia.o__Caldisericales.f__Caldisericaceae.g__Caldisericum	k__Bacteria.p__Deinococcus.Thermus.c__Deinococci.o__Thermales.f__Thermaceae.g__Oceanithermus
k__Bacteria.p__Cyanobacteria.o__Chroococcales.g__Synechococcus	k__Bacteria.p__Thermotogae.c__Thermotogae.o__Thermotogales.f__Thermotogaceae.g__Pseudothermotoga
k__Bacteria.p__Proteobacteria.c__Betaproteobacteria.o__Burkholderiales.g__Aquabacterium	k__Bacteria.p__Proteobacteria.c__Gammaproteobacteria.o__Enterobacteriales.f__Enterobacteriaceae.g__Chania
k__Bacteria.p__Proteobacteria.c__Gammaproteobacteria.o__Oceanospirillales.f__Hahellaceae.g__Endozoicomonas	k__Bacteria.p__Proteobacteria.c__Alphaproteobacteria.o__Rhodospirillales.g__Elioraea
k__Bacteria.p__Proteobacteria.c__Alphaproteobacteria.o__Rhodobacterales.f__Rhodobacteraceae.g__Roseobacter	k__Bacteria.p__Proteobacteria.c__Alphaproteobacteria.o__Rhizobiales.f__Rhodobiaceae.g__Lutibaculum
k__Bacteria.p__Actinobacteria.c__Actinobacteria.o__Micrococcales.f__Promicromonosporaceae.g__Promicromonospora	k__Bacteria.p__Actinobacteria.c__Coriobacteriia.o__Coriobacteriales.f__Coriobacteriaceae.g__Coriobacterium
k__Bacteria.p__Bacteroidetes.c__Flavobacteriia.o__Flavobacteriales.f__Flavobacteriaceae.g__Joostella	k__Bacteria.p__Actinobacteria.c__Actinobacteria.o__Micromonosporales.f__Micromonosporaceae.g__Verrucosispora
k__Bacteria.p__Proteobacteria.c__Gammaproteobacteria.o__Chromatiales.f__Ectothiorhodospiraceae.g__Thioalkalivibrio	k__Bacteria.p__Aquificae.c__Aquificae.o__Aquificales.f__Aquificaceae.g__Hydrogenobaculum
k__Bacteria.p__Proteobacteria.c__Betaproteobacteria.o__Burkholderiales.f__Oxalobacteraceae.g__Noviherbaspirillum	k__Archaea.p__Thaumarchaeota.c__Nitrososphaeria.o__Nitrososphaerales.f__Nitrososphaeraceae.g__Candidatus_Nitrosocosmicus
k__Bacteria.p__Planctomycetes.c__Planctomycetia.o__Planctomycetales.f__Planctomycetaceae.g__Planctomyces	k__Bacteria.p__Firmicutes.c__Negativicutes.o__Acidaminococcales.f__Acidaminococcaceae.g__Acidaminococcus
k__Bacteria.p__Fusobacteria.c__Fusobacteriia.o__Fusobacteriales.f__Leptotrichiaceae.g__Leptotrichia	k__Bacteria.p__Bacteroidetes.c__Bacteroidia.o__Bacteroidales.f__Odoribacteraceae.g__Odoribacter
k__Bacteria.p__Proteobacteria.c__Gammaproteobacteria.o__Nevskiales.f__Sinobacteraceae.g__Solimonas	k__Bacteria.p__Planctomycetes.c__Planctomycetia.o__Candidatus_Brocadiales.f__Candidatus_Brocadiaceae.g__Candidatus_Brocadia
k__Bacteria.p__Nitrospirae.c__Nitrospira.o__Nitrospirales.f__Nitrospiraceae.g__Candidatus_Magnetobacterium	k__Bacteria.p__Firmicutes.c__Clostridia.o__Clostridiales.f__Eubacteriaceae.g__Anaerofustis
k__Bacteria.p__Proteobacteria.c__Gammaproteobacteria.o__Enterobacteriales.f__Enterobacteriaceae.g__Photorhabdus	k__Bacteria.p__Cyanobacteria.o__Nostocales.f__Nostocaceae.g__Nostoc
k__Archaea.p__Euryarchaeota.c__Thermoplasmata.o__Thermoplasmatales.f__Ferroplasmaceae.g__Acidiplasma	k__Bacteria.p__Proteobacteria.c__Gammaproteobacteria.o__Alteromonadales.f__Psychromonadaceae.g__Psychromonas
k__Bacteria.p__Cyanobacteria.o__Chroococcales.g__Halothece	k__Bacteria.p__Actinobacteria.c__Actinobacteria.o__Micromonosporales.f__Micromonosporaceae.g__Dactylosporangium
k__Bacteria.p__Proteobacteria.c__Alphaproteobacteria.o__Rhodospirillales.f__Acetobacteraceae.g__Granulibacter	k__Bacteria.p__Actinobacteria.c__Coriobacteriia.o__Eggerthellales.f__Eggerthellaceae.g__Cryptobacterium
k__Bacteria.p__Proteobacteria.c__Gammaproteobacteria.o__Enterobacteriales.f__Enterobacteriaceae.g__Trabulsiella	k__Bacteria.p__Cyanobacteria.o__Pleurocapsales.g__Xenococcus
k__Bacteria.p__Proteobacteria.c__Betaproteobacteria.o__Burkholderiales.g__Mitsuaria	k__Bacteria.p__Proteobacteria.c__Alphaproteobacteria.o__Rickettsiales.g__Caedibacter
k__Bacteria.p__Proteobacteria.c__Alphaproteobacteria.o__Caulobacterales.f__Caulobacteraceae.g__Woodsholea	k__Bacteria.p__Bacteroidetes.c__Bacteroidia.o__Bacteroidales.f__Marinilabiliaceae.g__Anaerophaga
k__Bacteria.p__Proteobacteria.c__Alphaproteobacteria.o__Rickettsiales.f__Anaplasmataceae.g__Anaplasma	k__Bacteria.p__Actinobacteria.c__Actinobacteria.o__Pseudonocardiales.f__Pseudonocardiaceae.g__Pseudonocardia
k__Bacteria.p__Deinococcus.Thermus.c__Deinococci.o__Deinococcales.f__Deinococcaceae.g__Deinococcus	k__Bacteria.p__Bacteroidetes.c__Flavobacteriia.o__Flavobacteriales.f__Flavobacteriaceae.g__Lacinutrix
k__Archaea.p__Euryarchaeota.c__Halobacteria.o__Halobacteriales.f__Halobacteriaceae.g__Candidatus_Halobonum	k__Bacteria.p__Firmicutes.c__Clostridia.o__Thermoanaerobacterales.f__Thermoanaerobacterales_Family_III._Incertae_Sedis.g__Syntrophaceticus
k__Bacteria.p__Proteobacteria.c__Gammaproteobacteria.o__Enterobacteriales.f__Enterobacteriaceae.g__Arsenophonus	k__Bacteria.p__Actinobacteria.c__Actinobacteria.o__Streptosporangiales.f__Streptosporangiaceae.g__Herbidospora
k__Bacteria.p__Proteobacteria.c__Gammaproteobacteria.o__Thiotrichales.f__Francisellaceae.g__Francisella	k__Bacteria.p__Proteobacteria.c__Alphaproteobacteria.o__Rhodobacterales.f__Rhodobacteraceae.g__Wenxinia
k__Bacteria.p__Proteobacteria.c__Betaproteobacteria.o__Neisseriales.f__Neisseriaceae.g__Kingella	k__Bacteria.p__Bacteroidetes.c__Flavobacteriia.o__Flavobacteriales.f__Flavobacteriaceae.g__Olleya
k__Bacteria.p__Proteobacteria.c__Alphaproteobacteria.o__Rhodospirillales.f__Rhodospirillaceae.g__Rhodospirillum	k__Archaea.p__Euryarchaeota.c__Halobacteria.o__Natrialbales.f__Natrialbaceae.g__Natronococcus
k__Bacteria.p__Proteobacteria.c__Gammaproteobacteria.o__Xanthomonadales.f__Xanthomonadaceae.g__Xanthomonas	k__Bacteria.p__Proteobacteria.c__Gammaproteobacteria.o__Pasteurellales.f__Pasteurellaceae.g__Bibersteinia
k__Archaea.p__Crenarchaeota.c__Thermoprotei.o__Desulfurococcales.f__Desulfurococcaceae.g__Desulfurococcus	k__Bacteria.p__Proteobacteria.c__Alphaproteobacteria.o__Rhizobiales.f__Rhodobiaceae.g__Parvibaculum
k__Bacteria.p__Actinobacteria.c__Actinobacteria.o__Micrococcales.f__Microbacteriaceae.g__Herbiconiux	k__Bacteria.p__Firmicutes.c__Clostridia.o__Clostridiales.f__Clostridiaceae.g__Hungatella
k__Bacteria.p__Proteobacteria.c__Gammaproteobacteria.o__Pseudomonadales.f__Pseudomonadaceae.g__Oblitimonas	k__Bacteria.p__Chloroflexi.c__Thermomicrobia.o__Sphaerobacterales.f__Sphaerobacteraceae.g__Sphaerobacter
k__Bacteria.p__Firmicutes.c__Clostridia.o__Clostridiales.f__Lachnospiraceae.g__Butyrivibrio	k__Bacteria.p__Proteobacteria.c__Alphaproteobacteria.o__Rickettsiales.f__Holosporaceae.g__Holospora
k__Bacteria.p__Proteobacteria.c__Gammaproteobacteria.o__Alteromonadales.f__Alteromonadaceae.g__Agarivorans	k__Bacteria.p__Proteobacteria.c__Betaproteobacteria.o__Burkholderiales.g__Tepidimonas
k__Bacteria.p__Firmicutes.c__Negativicutes.o__Veillonellales.f__Veillonellaceae.g__Megasphaera	k__Archaea.p__Euryarchaeota.c__Halobacteria.o__Natrialbales.f__Natrialbaceae.g__Natronobacterium
k__Bacteria.p__Bacteroidetes.c__Bacteroidia.o__Bacteroidales.f__Lentimicrobiaceae.g__Lentimicrobium	k__Bacteria.p__Proteobacteria.c__Alphaproteobacteria.o__Rhodospirillales.f__Rhodospirillaceae.g__Inquilinus
k__Bacteria.p__Firmicutes.c__Clostridia.o__Clostridiales.f__Heliobacteriaceae.g__Heliobacterium	k__Bacteria.p__Firmicutes.c__Bacilli.o__Bacillales.f__Bacillaceae.g__Halalkalibacillus
k__Bacteria.p__Proteobacteria.c__Gammaproteobacteria.o__Orbales.f__Orbaceae.g__Frischella	k__Archaea.p__Euryarchaeota.c__Halobacteria.o__Halobacteriales.f__Halobacteriaceae.g__Halobacterium
k__Bacteria.p__Proteobacteria.c__Alphaproteobacteria.o__Rhizobiales.f__Bradyrhizobiaceae.g__Afipia	k__Bacteria.p__Bacteroidetes.c__Flavobacteriia.o__Flavobacteriales.f__Flavobacteriaceae.g__Apibacter
k__Archaea.p__Crenarchaeota.c__Thermoprotei.o__Desulfurococcales.f__Desulfurococcaceae.g__Thermogladius	k__Bacteria.p__Cyanobacteria.o__Chroococcales.g__Thermosynechococcus
k__Bacteria.p__Lentisphaerae.c__Lentisphaeria.o__Lentisphaerales.f__Lentisphaeraceae.g__Lentisphaera	k__Bacteria.p__Proteobacteria.c__Betaproteobacteria.o__Burkholderiales.f__Comamonadaceae.g__Diaphorobacter
k__Bacteria.p__Proteobacteria.c__Alphaproteobacteria.o__Rhizobiales.f__Phyllobacteriaceae.g__Nitratireductor	k__Bacteria.p__Proteobacteria.c__Betaproteobacteria.o__Burkholderiales.g__Methylibium
k__Bacteria.p__Proteobacteria.c__Zetaproteobacteria.o__Mariprofundales.f__Mariprofundaceae.g__Mariprofundus	k__Bacteria.p__Proteobacteria.c__Alphaproteobacteria.o__Rhodobacterales.f__Rhodobacteraceae.g__Dinoroseobacter
k__Bacteria.p__Proteobacteria.c__Gammaproteobacteria.o__Enterobacteriales.f__Enterobacteriaceae.g__Yokenella	k__Bacteria.p__Proteobacteria.c__Betaproteobacteria.o__Burkholderiales.f__Burkholderiaceae.g__Candidatus_Glomeribacter
k__Bacteria.p__Bacteroidetes.c__Flavobacteriia.o__Flavobacteriales.f__Flavobacteriaceae.g__Gaetbulibacter	k__Bacteria.p__Bacteroidetes.c__Bacteroidia.o__Bacteroidales.f__Rikenellaceae.g__Rikenella
k__Bacteria.p__Firmicutes.c__Clostridia.o__Clostridiales.f__Symbiobacteriaceae.g__Symbiobacterium	k__Bacteria.p__Firmicutes.c__Clostridia.o__Clostridiales.f__Lachnospiraceae.g__Marvinbryantia
k__Bacteria.p__Proteobacteria.c__Gammaproteobacteria.o__Pasteurellales.f__Pasteurellaceae.g__Histophilus	k__Bacteria.p__Proteobacteria.c__Epsilonproteobacteria.o__Campylobacterales.f__Helicobacteraceae.g__Wolinella
k__Bacteria.p__Proteobacteria.c__Deltaproteobacteria.o__Myxococcales.f__Cystobacteraceae.g__Archangium	k__Bacteria.p__Proteobacteria.c__Deltaproteobacteria.o__Desulfobacterales.f__Desulfobacteraceae.g__Desulfobacterium
k__Bacteria.p__Acidobacteria.c__Acidobacteriia.o__Acidobacteriales.f__Acidobacteriaceae.g__Edaphobacter	k__Bacteria.p__Proteobacteria.c__Gammaproteobacteria.o__Oceanospirillales.f__Hahellaceae.g__Hahella
k__Archaea.p__Euryarchaeota.c__Halobacteria.o__Halobacteriales.f__Halobacteriaceae.g__Halosimplex	k__Bacteria.p__Bacteroidetes.c__Flavobacteriia.o__Flavobacteriales.f__Flavobacteriaceae.g__Muricauda
k__Bacteria.p__Actinobacteria.c__Actinobacteria.o__Streptosporangiales.f__Thermomonosporaceae.g__Spirillospora	k__Bacteria.p__Proteobacteria.c__Betaproteobacteria.o__Rhodocyclales.f__Rhodocyclaceae.g__Azoarcus
k__Bacteria.p__Proteobacteria.c__Betaproteobacteria.o__Burkholderiales.g__Paucibacter	k__Bacteria.p__Firmicutes.c__Negativicutes.o__Acidaminococcales.f__Acidaminococcaceae.g__Phascolarctobacterium
k__Bacteria.p__Cyanobacteria.o__Chroococcales.g__Synechocystis	k__Bacteria.p__Proteobacteria.c__Deltaproteobacteria.o__Myxococcales.f__Cystobacteraceae.g__Archangium
k__Bacteria.p__Proteobacteria.c__Betaproteobacteria.o__Burkholderiales.f__Alcaligenaceae.g__Basilea	k__Bacteria.p__Proteobacteria.c__Alphaproteobacteria.o__Rhodobacterales.f__Rhodobacteraceae.g__Sediminimonas
k__Bacteria.p__Firmicutes.c__Bacilli.o__Bacillales.f__Alicyclobacillaceae.g__Effusibacillus	k__Bacteria.p__Proteobacteria.c__Gammaproteobacteria.f__Competibacteraceae.g__Candidatus_Competibacter
k__Bacteria.p__Firmicutes.c__Clostridia.o__Clostridiales.f__Lachnospiraceae.g__Lachnoanaerobaculum	k__Bacteria.p__Actinobacteria.c__Actinobacteria.o__Micrococcales.f__Micrococcaceae.g__Arthrobacter
k__Bacteria.p__Proteobacteria.c__Gammaproteobacteria.o__Pasteurellales.f__Pasteurellaceae.g__Avibacterium	k__Bacteria.p__Chlorobi.c__Chlorobia.o__Chlorobiales.f__Chlorobiaceae.g__Chlorobaculum
k__Bacteria.p__Firmicutes.c__Bacilli.o__Lactobacillales.f__Carnobacteriaceae.g__Jeotgalibaca	k__Bacteria.p__Firmicutes.c__Clostridia.o__Clostridiales.f__Oscillospiraceae.g__Oscillibacter
k__Bacteria.p__Proteobacteria.c__Alphaproteobacteria.o__Rhizobiales.f__Rhizobiaceae.g__Neorhizobium	k__Bacteria.p__Actinobacteria.c__Actinobacteria.o__Micrococcales.f__Intrasporangiaceae.g__Janibacter
k__Bacteria.p__Proteobacteria.c__Betaproteobacteria.o__Neisseriales.f__Chromobacteriaceae.g__Chitinibacter	k__Archaea.p__Euryarchaeota.c__Methanobacteria.o__Methanobacteriales.f__Methanothermaceae.g__Methanothermus
k__Bacteria.p__Verrucomicrobia.c__Verrucomicrobiae.o__Verrucomicrobiales.f__Verrucomicrobiaceae.g__Verrucomicrobium	k__Bacteria.p__Bacteroidetes.c__Flavobacteriia.o__Flavobacteriales.f__Flavobacteriaceae.g__Joostella
k__Bacteria.p__Proteobacteria.c__Betaproteobacteria.o__Burkholderiales.f__Burkholderiaceae.g__Ralstonia	k__Bacteria.p__Proteobacteria.c__Gammaproteobacteria.o__Enterobacteriales.f__Enterobacteriaceae.g__Raoultella
k__Bacteria.p__Proteobacteria.c__Acidithiobacillia.o__Acidithiobacillales.f__Thermithiobacillaceae.g__Thermithiobacillus	k__Bacteria.p__Proteobacteria.c__Alphaproteobacteria.o__Rhodospirillales.f__Rhodospirillaceae.g__Phaeospirillum
k__Bacteria.p__Bacteroidetes.c__Chitinophagia.o__Chitinophagales.f__Chitinophagaceae.g__Flavisolibacter	k__Bacteria.p__Proteobacteria.c__Deltaproteobacteria.o__Desulfuromonadales.f__Geobacteraceae.g__Geobacter
k__Bacteria.p__Actinobacteria.c__Actinobacteria.o__Corynebacteriales.f__Segniliparaceae.g__Segniliparus	k__Bacteria.p__Deinococcus.Thermus.c__Deinococci.o__Thermales.f__Thermaceae.g__Marinithermus
k__Bacteria.p__Firmicutes.c__Clostridia.o__Thermoanaerobacterales.f__Thermoanaerobacterales_Family_III._Incertae_Sedis.g__Syntrophaceticus	k__Bacteria.p__Firmicutes.c__Clostridia.o__Clostridiales.f__Peptostreptococcaceae.g__Paraclostridium
k__Bacteria.p__Synergistetes.c__Synergistia.o__Synergistales.f__Synergistaceae.g__Anaerobaculum	k__Bacteria.p__Proteobacteria.c__Gammaproteobacteria.o__Enterobacteriales.f__Enterobacteriaceae.g__Candidatus_Tachikawaea
k__Bacteria.p__Bacteroidetes.c__Cytophagia.o__Cytophagales.f__Cytophagaceae.g__Fibrella	k__Bacteria.p__Actinobacteria.c__Actinobacteria.o__Micrococcales.f__Cellulomonadaceae.g__Paraoerskovia
k__Bacteria.p__Bacteroidetes.c__Flavobacteriia.o__Flavobacteriales.f__Flavobacteriaceae.g__Zunongwangia	k__Bacteria.p__Proteobacteria.c__Deltaproteobacteria.o__Myxococcales.f__Anaeromyxobacteraceae.g__Anaeromyxobacter
k__Bacteria.p__Firmicutes.c__Bacilli.o__Bacillales.f__Planococcaceae.g__Kurthia	k__Bacteria.p__Proteobacteria.c__Alphaproteobacteria.o__Rhodospirillales.f__Rhodospirillaceae.g__Nisaea
k__Bacteria.p__Bacteroidetes.c__Flavobacteriia.o__Flavobacteriales.f__Flavobacteriaceae.g__Gramella	k__Archaea.p__Euryarchaeota.c__Thermoplasmata.o__Methanomassiliicoccales.f__Methanomassiliicoccaceae.g__Candidatus_Methanoplasma
k__Bacteria.p__Chloroflexi.c__Dehalococcoidia.g__Dehalogenimonas	k__Bacteria.p__Cyanobacteria.o__Nostocales.f__Microchaetaceae.g__Tolypothrix
k__Bacteria.p__Candidatus_Cloacimonetes.g__Candidatus_Cloacimonas	k__Bacteria.p__Proteobacteria.c__Deltaproteobacteria.o__Desulfarculales.f__Desulfarculaceae.g__Dethiosulfatarculus
k__Bacteria.p__Firmicutes.c__Negativicutes.o__Selenomonadales.f__Selenomonadaceae.g__Anaerovibrio	k__Bacteria.p__Proteobacteria.c__Alphaproteobacteria.o__Rhodobacterales.f__Rhodobacteraceae.g__Oceanicola
k__Archaea.p__Euryarchaeota.c__Methanomicrobia.o__Methanomicrobiales.f__Methanoregulaceae.g__Methanolinea	k__Bacteria.p__Proteobacteria.c__Alphaproteobacteria.o__Rhizobiales.f__Rhizobiaceae.g__Rhizobium
k__Archaea.p__Euryarchaeota.c__Methanomicrobia.o__Methanomicrobiales.f__Methanomicrobiaceae.g__Methanolacinia	k__Bacteria.p__Firmicutes.c__Bacilli.o__Lactobacillales.f__Carnobacteriaceae.g__Jeotgalibaca
k__Bacteria.p__Proteobacteria.c__Alphaproteobacteria.o__Rhodospirillales.f__Rhodospirillaceae.g__Inquilinus	k__Bacteria.p__Proteobacteria.c__Alphaproteobacteria.o__Rhizobiales.f__Rhizobiaceae.g__Agrobacterium
k__Bacteria.p__Synergistetes.c__Synergistia.o__Synergistales.f__Synergistaceae.g__Jonquetella	k__Bacteria.p__Firmicutes.c__Bacilli.o__Bacillales.f__Sporolactobacillaceae.g__Tuberibacillus
k__Bacteria.p__Proteobacteria.c__Gammaproteobacteria.o__Alteromonadales.f__Idiomarinaceae.g__Idiomarina	k__Bacteria.p__Proteobacteria.c__Betaproteobacteria.o__Burkholderiales.f__Alcaligenaceae.g__Castellaniella
k__Archaea.p__Euryarchaeota.c__Methanococci.o__Methanococcales.f__Methanocaldococcaceae.g__Methanotorris	k__Bacteria.p__Actinobacteria.c__Actinobacteria.o__Micrococcales.f__Dermatophilaceae.g__Mobilicoccus
k__Bacteria.p__Cyanobacteria.o__Pleurocapsales.g__Myxosarcina	k__Bacteria.p__Bacteroidetes.c__Cytophagia.o__Cytophagales.f__Amoebophilaceae.g__Candidatus_Amoebophilus
k__Bacteria.p__Proteobacteria.c__Betaproteobacteria.o__Neisseriales.f__Chromobacteriaceae.g__Pseudogulbenkiania	k__Bacteria.p__Bacteroidetes.c__Flavobacteriia.o__Flavobacteriales.f__Cryomorphaceae.g__Owenweeksia
k__Bacteria.p__Chloroflexi.c__Anaerolineae.o__Anaerolineales.f__Anaerolineaceae.g__Anaerolinea	k__Bacteria.p__Proteobacteria.c__Betaproteobacteria.o__Hydrogenophilales.f__Hydrogenophilaceae.g__Tepidiphilus
k__Bacteria.p__Proteobacteria.c__Gammaproteobacteria.o__Enterobacteriales.f__Enterobacteriaceae.g__Pantoea	k__Bacteria.p__Cyanobacteria.o__Oscillatoriales.g__Oscillatoria
k__Bacteria.p__Proteobacteria.c__Alphaproteobacteria.g__Thermopetrobacter	k__Bacteria.p__Proteobacteria.c__Betaproteobacteria.o__Neisseriales.f__Chromobacteriaceae.g__Chitiniphilus
k__Bacteria.p__Actinobacteria.c__Acidimicrobiia.o__Acidimicrobiales.f__Acidimicrobiaceae.g__Ferrimicrobium	k__Bacteria.p__Chlamydiae.c__Chlamydiia.o__Chlamydiales.f__Chlamydiaceae.g__Chlamydia
k__Bacteria.p__Firmicutes.c__Negativicutes.o__Selenomonadales.f__Selenomonadaceae.g__Selenomonas	k__Bacteria.p__Proteobacteria.c__Alphaproteobacteria.o__Rhodobacterales.f__Rhodobacteraceae.g__Pseudooceanicola
k__Bacteria.p__Proteobacteria.c__Gammaproteobacteria.o__Pasteurellales.f__Pasteurellaceae.g__Gallibacterium	k__Bacteria.p__Proteobacteria.c__Gammaproteobacteria.o__Enterobacteriales.f__Enterobacteriaceae.g__Plesiomonas
k__Bacteria.p__Proteobacteria.c__Gammaproteobacteria.o__Thiotrichales.f__Piscirickettsiaceae.g__Thiomicrospira	k__Bacteria.p__Cyanobacteria.o__Oscillatoriales.g__Pseudanabaena
k__Bacteria.p__Proteobacteria.c__Gammaproteobacteria.o__Alteromonadales.f__Alteromonadaceae.g__Gayadomonas	k__Bacteria.p__Proteobacteria.c__Gammaproteobacteria.o__Chromatiales.f__Chromatiaceae.g__Allochromatium
k__Bacteria.p__Proteobacteria.c__Alphaproteobacteria.o__Rhodospirillales.f__Rhodospirillaceae.g__Oceanibaculum	k__Bacteria.p__Firmicutes.c__Negativicutes.o__Selenomonadales.f__Selenomonadaceae.g__Anaerovibrio
k__Bacteria.p__Proteobacteria.c__Gammaproteobacteria.o__Chromatiales.f__Chromatiaceae.g__Thiohalocapsa	k__Bacteria.p__Firmicutes.c__Bacilli.o__Bacillales.f__Bacillaceae.g__Hydrogenibacillus
k__Bacteria.p__Proteobacteria.c__Alphaproteobacteria.o__Rhizobiales.f__Methylocystaceae.g__Terasakiella	k__Bacteria.p__Armatimonadetes.c__Fimbriimonadia.o__Fimbriimonadales.f__Fimbriimonadaceae.g__Fimbriimonas
k__Bacteria.p__Proteobacteria.c__Alphaproteobacteria.o__Rhodobacterales.f__Rhodobacteraceae.g__Rubellimicrobium	k__Bacteria.p__Deferribacteres.c__Deferribacteres.o__Deferribacterales.f__Deferribacteraceae.g__Deferribacter
k__Archaea.p__Euryarchaeota.c__Methanomicrobia.o__Methanosarcinales.f__Methanosarcinaceae.g__Methanohalophilus	k__Bacteria.p__Proteobacteria.c__Betaproteobacteria.o__Rhodocyclales.f__Rhodocyclaceae.g__Aromatoleum
k__Bacteria.p__Firmicutes.c__Bacilli.o__Lactobacillales.f__Aerococcaceae.g__Eremococcus	k__Bacteria.p__Firmicutes.c__Clostridia.o__Halanaerobiales.f__Halobacteroidaceae.g__Acetohalobium
k__Bacteria.p__Actinobacteria.c__Actinobacteria.o__Micrococcales.g__Tropheryma	k__Bacteria.p__Proteobacteria.c__Gammaproteobacteria.o__Chromatiales.f__Chromatiaceae.g__Lamprocystis
k__Bacteria.p__Firmicutes.c__Clostridia.o__Clostridiales.f__Lachnospiraceae.g__Blautia	k__Bacteria.p__Proteobacteria.c__Gammaproteobacteria.o__Enterobacteriales.f__Enterobacteriaceae.g__Sodalis
k__Bacteria.p__Proteobacteria.c__Gammaproteobacteria.o__Chromatiales.f__Ectothiorhodospiraceae.g__Acidihalobacter	k__Bacteria.p__Firmicutes.c__Bacilli.o__Bacillales.f__Alicyclobacillaceae.g__Effusibacillus
k__Bacteria.p__Bacteroidetes.c__Flavobacteriia.o__Flavobacteriales.f__Flavobacteriaceae.g__Ornithobacterium	k__Bacteria.p__Proteobacteria.c__Gammaproteobacteria.o__Enterobacteriales.f__Enterobacteriaceae.g__Shigella
k__Bacteria.p__Proteobacteria.c__Alphaproteobacteria.o__Rhodobacterales.f__Rhodobacteraceae.g__Halocynthiibacter	k__Bacteria.p__Proteobacteria.c__Alphaproteobacteria.o__Rhodospirillales.f__Acetobacteraceae.g__Kozakia
k__Archaea.p__Thaumarchaeota.c__Nitrososphaeria.o__Nitrososphaerales.f__Nitrososphaeraceae.g__Candidatus_Nitrosocosmicus	k__Bacteria.p__Proteobacteria.c__Deltaproteobacteria.o__Myxococcales.f__Polyangiaceae.g__Sorangium
k__Bacteria.p__Firmicutes.c__Erysipelotrichia.o__Erysipelotrichales.f__Erysipelotrichaceae.g__Coprobacillus	k__Bacteria.p__Firmicutes.c__Clostridia.o__Clostridiales.f__Lachnospiraceae.g__Blautia
k__Bacteria.p__Proteobacteria.c__Gammaproteobacteria.o__Enterobacteriales.f__Enterobacteriaceae.g__Buttiauxella	k__Archaea.p__Euryarchaeota.c__Halobacteria.o__Halobacteriales.f__Halobacteriaceae.g__Halapricum
k__Bacteria.p__Proteobacteria.c__Gammaproteobacteria.o__Enterobacteriales.f__Enterobacteriaceae.g__Candidatus_Hamiltonella	k__Bacteria.p__Actinobacteria.c__Actinobacteria.o__Nakamurellales.f__Nakamurellaceae.g__Nakamurella
k__Bacteria.p__Proteobacteria.c__Betaproteobacteria.o__Burkholderiales.f__Comamonadaceae.g__Pseudacidovorax	k__Bacteria.p__Proteobacteria.c__Gammaproteobacteria.o__Oceanospirillales.f__Oceanospirillaceae.g__Thalassolituus
k__Bacteria.p__Firmicutes.c__Clostridia.o__Thermoanaerobacterales.f__Thermoanaerobacteraceae.g__Moorella	k__Bacteria.p__Proteobacteria.c__Alphaproteobacteria.o__Rhizobiales.f__Bartonellaceae.g__Bartonella
k__Bacteria.p__Proteobacteria.c__Gammaproteobacteria.o__Methylococcales.f__Methylococcaceae.g__Methylomarinum	k__Bacteria.p__Actinobacteria.c__Actinobacteria.o__Micrococcales.f__Microbacteriaceae.g__Agrococcus
k__Archaea.p__Euryarchaeota.c__Halobacteria.o__Natrialbales.f__Natrialbaceae.g__Natronorubrum	k__Bacteria.p__Proteobacteria.c__Gammaproteobacteria.o__Thiotrichales.f__Piscirickettsiaceae.g__Methylophaga
k__Archaea.p__Euryarchaeota.c__Halobacteria.o__Haloferacales.f__Haloferacaceae.g__Haloferax	k__Bacteria.p__Proteobacteria.c__Deltaproteobacteria.o__Desulfobacterales.f__Desulfobacteraceae.g__Desulfotignum
k__Bacteria.p__Firmicutes.c__Bacilli.o__Bacillales.f__Bacillales_Family_X._Incertae_Sedis.g__Thermicanus	k__Bacteria.p__Firmicutes.c__Erysipelotrichia.o__Erysipelotrichales.f__Erysipelotrichaceae.g__Erysipelatoclostridium
k__Bacteria.p__Thermotogae.c__Thermotogae.o__Thermotogales.f__Fervidobacteriaceae.g__Thermosipho	k__Bacteria.p__Proteobacteria.c__Gammaproteobacteria.o__Thiotrichales.g__Fangia
k__Bacteria.p__Proteobacteria.c__Alphaproteobacteria.o__Rhodobacterales.f__Hyphomonadaceae.g__Maricaulis	k__Bacteria.p__Proteobacteria.c__Gammaproteobacteria.o__Chromatiales.f__Ectothiorhodospiraceae.g__Halorhodospira
k__Bacteria.p__Proteobacteria.c__Gammaproteobacteria.o__Enterobacteriales.f__Enterobacteriaceae.g__Candidatus_Riesia	k__Bacteria.p__Chlamydiae.c__Chlamydiia.o__Chlamydiales.f__Simkaniaceae.g__Simkania
k__Bacteria.p__Proteobacteria.c__Gammaproteobacteria.o__Xanthomonadales.f__Rhodanobacteraceae.g__Rhodanobacter	k__Bacteria.p__Bacteroidetes.c__Flavobacteriia.o__Flavobacteriales.f__Flavobacteriaceae.g__Ornithobacterium
k__Bacteria.p__Proteobacteria.c__Gammaproteobacteria.o__Alteromonadales.f__Alteromonadaceae.g__Glaciecola	k__Bacteria.p__Proteobacteria.c__Alphaproteobacteria.o__Sphingomonadales.f__Sphingomonadaceae.g__Citromicrobium
k__Bacteria.p__Proteobacteria.c__Gammaproteobacteria.o__Chromatiales.f__Chromatiaceae.g__Arsukibacterium	k__Bacteria.p__Actinobacteria.c__Rubrobacteria.o__Rubrobacterales.f__Rubrobacteraceae.g__Rubrobacter
k__Bacteria.p__Proteobacteria.c__Alphaproteobacteria.o__Rhodobacterales.f__Rhodobacteraceae.g__Roseibium	k__Bacteria.p__Firmicutes.c__Bacilli.o__Lactobacillales.f__Carnobacteriaceae.g__Granulicatella
k__Bacteria.p__Proteobacteria.c__Gammaproteobacteria.g__Gallaecimonas	k__Bacteria.p__Proteobacteria.c__Betaproteobacteria.o__Burkholderiales.f__Comamonadaceae.g__Xenophilus
k__Bacteria.p__Firmicutes.c__Clostridia.o__Clostridiales.f__Peptococcaceae.g__Desulfotomaculum	k__Archaea.p__Euryarchaeota.c__Methanomicrobia.o__Methanosarcinales.f__Methanosarcinaceae.g__Methanolobus
k__Bacteria.p__Proteobacteria.c__Gammaproteobacteria.o__Enterobacteriales.f__Enterobacteriaceae.g__Pluralibacter	k__Bacteria.p__Proteobacteria.c__Betaproteobacteria.o__Burkholderiales.g__Aquincola
k__Bacteria.p__Proteobacteria.c__Alphaproteobacteria.o__Rhodobacterales.f__Rhodobacteraceae.g__Pseudophaeobacter	k__Bacteria.p__Chloroflexi.c__Anaerolineae.o__Anaerolineales.f__Anaerolineaceae.g__Levilinea
k__Archaea.p__Euryarchaeota.c__Methanobacteria.o__Methanobacteriales.f__Methanobacteriaceae.g__Methanobacterium	k__Bacteria.p__Actinobacteria.c__Actinobacteria.o__Micrococcales.f__Microbacteriaceae.g__Salinibacterium
k__Bacteria.p__Firmicutes.c__Bacilli.o__Bacillales.f__Planococcaceae.g__Viridibacillus	k__Bacteria.p__Synergistetes.c__Synergistia.o__Synergistales.f__Synergistaceae.g__Cloacibacillus
k__Bacteria.p__Actinobacteria.c__Actinobacteria.o__Streptomycetales.f__Streptomycetaceae.g__Streptacidiphilus	k__Archaea.p__Crenarchaeota.c__Thermoprotei.o__Sulfolobales.f__Sulfolobaceae.g__Metallosphaera
k__Bacteria.p__Chloroflexi.c__Chloroflexia.o__Chloroflexales.f__Chloroflexaceae.g__Chloroflexus	k__Bacteria.p__Fusobacteria.c__Fusobacteriia.o__Fusobacteriales.f__Leptotrichiaceae.g__Leptotrichia
k__Bacteria.p__Aquificae.c__Aquificae.o__Aquificales.f__Hydrogenothermaceae.g__Persephonella	k__Bacteria.p__Proteobacteria.c__Gammaproteobacteria.o__Chromatiales.f__Chromatiaceae.g__Marichromatium
k__Bacteria.p__Proteobacteria.c__Gammaproteobacteria.o__Cellvibrionales.f__Cellvibrionaceae.g__Teredinibacter	k__Bacteria.p__Thermotogae.c__Thermotogae.o__Kosmotogales.f__Kosmotogaceae.g__Mesotoga
k__Bacteria.p__Firmicutes.c__Erysipelotrichia.o__Erysipelotrichales.f__Erysipelotrichaceae.g__Candidatus_Stoquefichus	k__Bacteria.p__Synergistetes.c__Synergistia.o__Synergistales.f__Synergistaceae.g__Aminomonas
k__Bacteria.p__Firmicutes.c__Clostridia.o__Clostridiales.f__Lachnospiraceae.g__Robinsoniella	k__Bacteria.p__Firmicutes.c__Clostridia.o__Clostridiales.f__Peptostreptococcaceae.g__Peptoclostridium
k__Bacteria.p__Proteobacteria.c__Deltaproteobacteria.g__Deferrisoma	k__Bacteria.p__Actinobacteria.c__Actinobacteria.o__Micromonosporales.f__Micromonosporaceae.g__Actinoplanes
k__Bacteria.p__Chloroflexi.c__Ktedonobacteria.o__Ktedonobacterales.f__Ktedonobacteraceae.g__Ktedonobacter	k__Bacteria.p__Deferribacteres.c__Deferribacteres.o__Deferribacterales.f__Deferribacteraceae.g__Flexistipes
k__Bacteria.p__Proteobacteria.c__Deltaproteobacteria.o__Myxococcales.f__Sandaracinaceae.g__Sandaracinus	k__Bacteria.p__Proteobacteria.c__Gammaproteobacteria.o__Cellvibrionales.f__Porticoccaceae.g__Porticoccus
k__Bacteria.p__Proteobacteria.c__Alphaproteobacteria.o__Rhizobiales.f__Aurantimonadaceae.g__Aureimonas	k__Archaea.p__Euryarchaeota.c__Halobacteria.o__Haloferacales.f__Haloferacaceae.g__Halobellus
k__Bacteria.p__Firmicutes.c__Clostridia.o__Clostridiales.f__Lachnospiraceae.g__Catonella	k__Archaea.p__Euryarchaeota.c__Thermoplasmata.o__Thermoplasmatales.f__Ferroplasmaceae.g__Ferroplasma
k__Bacteria.p__Firmicutes.c__Bacilli.o__Lactobacillales.f__Lactobacillaceae.g__Lactobacillus	k__Bacteria.p__Bacteroidetes.c__Bacteroidia.o__Bacteroidales.f__Prolixibacteraceae.g__Draconibacterium
k__Bacteria.p__Chrysiogenetes.c__Chrysiogenetes.o__Chrysiogenales.f__Chrysiogenaceae.g__Desulfurispirillum	k__Bacteria.p__Proteobacteria.c__Betaproteobacteria.o__Neisseriales.f__Chromobacteriaceae.g__Vogesella
k__Bacteria.p__Actinobacteria.c__Actinobacteria.o__Streptosporangiales.f__Nocardiopsaceae.g__Streptomonospora	k__Bacteria.p__Firmicutes.c__Clostridia.o__Clostridiales.f__Peptostreptococcaceae.g__Peptostreptococcus
k__Bacteria.p__Firmicutes.c__Clostridia.o__Clostridiales.f__Ruminococcaceae.g__Pseudobacteroides	k__Bacteria.p__Bacteroidetes.c__Bacteroidia.o__Bacteroidales.f__Porphyromonadaceae.g__Tannerella
k__Archaea.p__Euryarchaeota.c__Methanococci.o__Methanococcales.f__Methanococcaceae.g__Methanothermococcus	k__Bacteria.p__Planctomycetes.c__Planctomycetia.o__Planctomycetales.f__Planctomycetaceae.g__Schlesneria
k__Bacteria.p__Proteobacteria.c__Betaproteobacteria.g__Kinetoplastibacterium	k__Bacteria.p__Proteobacteria.c__Betaproteobacteria.o__Neisseriales.f__Chromobacteriaceae.g__Aquitalea
k__Bacteria.p__Proteobacteria.c__Gammaproteobacteria.o__Chromatiales.f__Ectothiorhodospiraceae.g__Thiorhodospira	k__Bacteria.p__Actinobacteria.c__Actinobacteria.o__Micrococcales.f__Promicromonosporaceae.g__Cellulosimicrobium
k__Bacteria.p__Bacteroidetes.c__Cytophagia.o__Cytophagales.f__Hymenobacteraceae.g__Pontibacter	k__Bacteria.p__Firmicutes.c__Bacilli.o__Lactobacillales.f__Leuconostocaceae.g__Oenococcus
k__Bacteria.p__Proteobacteria.c__Gammaproteobacteria.o__Chromatiales.f__Chromatiaceae.g__Thiocapsa	k__Bacteria.p__Cyanobacteria.o__Oscillatoriales.g__Geitlerinema
k__Bacteria.p__Actinobacteria.c__Actinobacteria.o__Micrococcales.f__Microbacteriaceae.g__Agromyces	k__Bacteria.p__Actinobacteria.c__Actinobacteria.o__Streptosporangiales.f__Streptosporangiaceae.g__Planomonospora
k__Bacteria.p__Actinobacteria.c__Actinobacteria.o__Pseudonocardiales.f__Pseudonocardiaceae.g__Prauserella	k__Bacteria.p__Firmicutes.c__Bacilli.o__Bacillales.f__Bacillaceae.g__Pontibacillus
k__Bacteria.p__Bacteroidetes.c__Chitinophagia.o__Chitinophagales.f__Chitinophagaceae.g__Sediminibacterium	k__Bacteria.p__Deferribacteres.c__Deferribacteres.o__Deferribacterales.f__Deferribacteraceae.g__Calditerrivibrio
k__Bacteria.p__Actinobacteria.c__Actinobacteria.o__Micrococcales.f__Brevibacteriaceae.g__Brevibacterium	k__Bacteria.p__Actinobacteria.c__Actinobacteria.o__Pseudonocardiales.f__Pseudonocardiaceae.g__Saccharomonospora
k__Bacteria.p__Proteobacteria.c__Alphaproteobacteria.o__Rhizobiales.f__Methylocystaceae.g__Methylopila	k__Archaea.p__Euryarchaeota.c__Halobacteria.o__Halobacteriales.f__Halobacteriaceae.g__Halarchaeum
k__Bacteria.p__Proteobacteria.c__Alphaproteobacteria.o__Kiloniellales.f__Kiloniellaceae.g__Kiloniella	k__Bacteria.p__Bacteroidetes.c__Cytophagia.o__Cytophagales.f__Cytophagaceae.g__Sporocytophaga
k__Bacteria.p__Actinobacteria.c__Acidimicrobiia.o__Acidimicrobiales.f__Acidimicrobiaceae.g__Acidithrix	k__Bacteria.p__Proteobacteria.c__Gammaproteobacteria.o__Enterobacteriales.f__Enterobacteriaceae.g__Tatumella
k__Bacteria.p__Proteobacteria.c__Betaproteobacteria.o__Neisseriales.f__Neisseriaceae.g__Alysiella	k__Bacteria.p__Actinobacteria.c__Actinobacteria.o__Streptosporangiales.f__Streptosporangiaceae.g__Nonomuraea
k__Archaea.p__Euryarchaeota.c__Thermoplasmata.o__Methanomassiliicoccales.f__Methanomassiliicoccaceae.g__Methanomassiliicoccus	k__Bacteria.p__Proteobacteria.c__Gammaproteobacteria.o__Enterobacteriales.f__Enterobacteriaceae.g__Kosakonia
k__Bacteria.p__Spirochaetes.c__Spirochaetia.o__Spirochaetales.f__Spirochaetaceae.g__Salinispira	k__Bacteria.p__Proteobacteria.c__Betaproteobacteria.o__Burkholderiales.f__Alcaligenaceae.g__Kerstersia
k__Bacteria.p__Firmicutes.c__Clostridia.o__Thermoanaerobacterales.f__Thermodesulfobiaceae.g__Coprothermobacter	k__Bacteria.p__Proteobacteria.c__Betaproteobacteria.o__Methylophilales.f__Methylophilaceae.g__Candidatus_Methylopumilus
k__Bacteria.p__Actinobacteria.c__Coriobacteriia.o__Eggerthellales.f__Eggerthellaceae.g__Cryptobacterium	k__Bacteria.p__Verrucomicrobia.c__Verrucomicrobiae.o__Verrucomicrobiales.f__Akkermansiaceae.g__Akkermansia
k__Bacteria.p__Bacteroidetes.c__Cytophagia.o__Cytophagales.f__Cytophagaceae.g__Emticicia	k__Bacteria.p__Bacteroidetes.c__Flavobacteriia.o__Flavobacteriales.f__Flavobacteriaceae.g__Eudoraea
k__Bacteria.p__Proteobacteria.c__Alphaproteobacteria.o__Rhodobacterales.f__Rhodobacteraceae.g__Pelagibaca	k__Bacteria.p__Bacteroidetes.c__Chitinophagia.o__Chitinophagales.f__Saprospiraceae.g__Saprospira
k__Bacteria.p__Proteobacteria.c__Betaproteobacteria.g__Candidatus_Accumulibacter	k__Bacteria.p__Proteobacteria.c__Gammaproteobacteria.o__Oceanospirillales.f__Hahellaceae.g__Endozoicomonas
k__Bacteria.p__Proteobacteria.c__Gammaproteobacteria.o__Cardiobacteriales.f__Cardiobacteriaceae.g__Cardiobacterium	k__Bacteria.p__Acidobacteria.c__Solibacteres.o__Solibacterales.g__Bryobacter
k__Bacteria.p__Proteobacteria.c__Deltaproteobacteria.o__Desulfobacterales.f__Desulfobulbaceae.g__Desulfocapsa	k__Bacteria.p__Proteobacteria.c__Alphaproteobacteria.o__Rhodobacterales.f__Rhodobacteraceae.g__Nautella
k__Bacteria.p__Proteobacteria.c__Alphaproteobacteria.o__Rhizobiales.f__Bradyrhizobiaceae.g__Bosea	k__Bacteria.p__Proteobacteria.c__Deltaproteobacteria.o__Bdellovibrionales.f__Halobacteriovoraceae.g__Halobacteriovorax
k__Bacteria.p__Bacteroidetes.c__Flavobacteriia.o__Flavobacteriales.f__Flavobacteriaceae.g__Psychroflexus	k__Bacteria.p__Bacteroidetes.c__Flavobacteriia.o__Flavobacteriales.f__Flavobacteriaceae.g__Zunongwangia
k__Archaea.p__Euryarchaeota.c__Thermococci.o__Thermococcales.f__Thermococcaceae.g__Palaeococcus	k__Bacteria.p__Proteobacteria.c__Alphaproteobacteria.o__Rhizobiales.f__Bradyrhizobiaceae.g__Oligotropha
k__Archaea.p__Euryarchaeota.c__Methanococci.o__Methanococcales.f__Methanocaldococcaceae.g__Methanocaldococcus	k__Bacteria.p__Firmicutes.c__Erysipelotrichia.o__Erysipelotrichales.f__Erysipelotrichaceae.g__Holdemanella
k__Bacteria.p__Cyanobacteria.o__Oscillatoriales.g__Kamptonema	k__Bacteria.p__Proteobacteria.c__Betaproteobacteria.g__Candidatus_Nasuia
k__Bacteria.p__Actinobacteria.c__Actinobacteria.o__Actinomycetales.f__Actinomycetaceae.g__Flaviflexus	k__Bacteria.p__Firmicutes.c__Bacilli.o__Bacillales.f__Listeriaceae.g__Brochothrix
k__Bacteria.p__Firmicutes.c__Bacilli.o__Bacillales.f__Planococcaceae.g__Jeotgalibacillus	k__Bacteria.p__Proteobacteria.c__Betaproteobacteria.o__Burkholderiales.f__Comamonadaceae.g__Ottowia
k__Bacteria.p__Firmicutes.c__Bacilli.o__Bacillales.f__Paenibacillaceae.g__Brevibacillus	k__Bacteria.p__Proteobacteria.c__Alphaproteobacteria.o__Rhodospirillales.f__Acetobacteraceae.g__Commensalibacter
k__Bacteria.p__Proteobacteria.c__Alphaproteobacteria.o__Rhodospirillales.f__Acetobacteraceae.g__Acidiphilium	k__Bacteria.p__Chloroflexi.c__Caldilineae.o__Caldilineales.f__Caldilineaceae.g__Caldilinea
k__Bacteria.p__Proteobacteria.c__Gammaproteobacteria.o__Enterobacteriales.f__Enterobacteriaceae.g__Chania	k__Bacteria.p__Proteobacteria.c__Deltaproteobacteria.o__Desulfobacterales.f__Desulfobacteraceae.g__Desulfobacter
k__Bacteria.p__Proteobacteria.c__Gammaproteobacteria.o__Oceanospirillales.f__Halomonadaceae.g__Zymobacter	k__Bacteria.p__Proteobacteria.c__Deltaproteobacteria.o__Desulfobacterales.f__Desulfobacteraceae.g__Desulfatiglans
k__Bacteria.p__Firmicutes.c__Clostridia.o__Clostridiales.f__Clostridiaceae.g__Clostridium	k__Bacteria.p__Proteobacteria.c__Deltaproteobacteria.o__Desulfobacterales.f__Desulfobulbaceae.g__Desulfocapsa
k__Bacteria.p__Proteobacteria.c__Alphaproteobacteria.g__Micavibrio	k__Bacteria.p__Proteobacteria.c__Gammaproteobacteria.o__Oceanospirillales.f__Halomonadaceae.g__Zymobacter
k__Bacteria.p__Proteobacteria.c__Betaproteobacteria.o__Burkholderiales.f__Sutterellaceae.g__Sutterella	k__Bacteria.p__Proteobacteria.c__Gammaproteobacteria.o__Oceanospirillales.f__Oceanospirillaceae.g__Balneatrix
k__Bacteria.p__Actinobacteria.c__Actinobacteria.o__Pseudonocardiales.f__Pseudonocardiaceae.g__Actinomycetospora	k__Bacteria.p__Proteobacteria.c__Gammaproteobacteria.o__Thiotrichales.f__Piscirickettsiaceae.g__Cycloclasticus
k__Bacteria.p__Proteobacteria.c__Gammaproteobacteria.o__Vibrionales.f__Vibrionaceae.g__Photobacterium	k__Bacteria.p__Actinobacteria.c__Actinobacteria.o__Micrococcales.f__Micrococcaceae.g__Renibacterium
k__Bacteria.p__Bacteroidetes.c__Flavobacteriia.o__Flavobacteriales.f__Flavobacteriaceae.g__Aequorivita	k__Bacteria.p__Firmicutes.c__Tissierellia.g__Kallipyga
k__Bacteria.p__Cyanobacteria.o__Oscillatoriales.g__Trichodesmium	k__Bacteria.p__Spirochaetes.c__Spirochaetia.o__Spirochaetales.f__Borreliaceae.g__Borreliella
k__Bacteria.p__Proteobacteria.c__Gammaproteobacteria.o__Chromatiales.f__Chromatiaceae.g__Thiorhodococcus	k__Bacteria.p__Proteobacteria.c__Gammaproteobacteria.o__Cellvibrionales.f__Microbulbiferaceae.g__Microbulbifer
k__Bacteria.p__Proteobacteria.c__Gammaproteobacteria.o__Methylococcales.f__Methylococcaceae.g__Methylobacter	k__Bacteria.p__Proteobacteria.c__Deltaproteobacteria.o__Desulfuromonadales.f__Desulfuromonadaceae.g__Pelobacter
k__Bacteria.p__Chlorobi.c__Chlorobia.o__Chlorobiales.f__Chlorobiaceae.g__Prosthecochloris	k__Bacteria.p__Cyanobacteria.o__Chroococcales.g__Synechococcus
k__Bacteria.p__Actinobacteria.c__Actinobacteria.o__Micromonosporales.f__Micromonosporaceae.g__Verrucosispora	k__Bacteria.p__Proteobacteria.c__Alphaproteobacteria.o__Rhodobacterales.f__Rhodobacteraceae.g__Pseudodonghicola
k__Bacteria.p__Bacteroidetes.c__Cytophagia.o__Cytophagales.f__Cyclobacteriaceae.g__Algoriphagus	k__Bacteria.p__Actinobacteria.c__Actinobacteria.o__Micrococcales.f__Promicromonosporaceae.g__Xylanimonas
k__Bacteria.p__Bacteroidetes.c__Cytophagia.o__Cytophagales.f__Amoebophilaceae.g__Candidatus_Cardinium	k__Archaea.p__Euryarchaeota.c__Halobacteria.o__Halobacteriales.f__Halobacteriaceae.g__Halomicrobium
k__Bacteria.p__Proteobacteria.c__Gammaproteobacteria.o__Nevskiales.f__Sinobacteraceae.g__Hydrocarboniphaga	k__Bacteria.p__Proteobacteria.c__Alphaproteobacteria.o__Rhodospirillales.f__Acetobacteraceae.g__Saccharibacter
k__Bacteria.p__Cyanobacteria.o__Nostocales.f__Nostocaceae.g__Raphidiopsis	k__Bacteria.p__Tenericutes.c__Mollicutes.o__Entomoplasmatales.f__Spiroplasmataceae.g__Spiroplasma
k__Bacteria.p__Actinobacteria.c__Coriobacteriia.o__Eggerthellales.f__Eggerthellaceae.g__Slackia	k__Bacteria.p__Actinobacteria.c__Actinobacteria.o__Pseudonocardiales.f__Pseudonocardiaceae.g__Alloactinosynnema
k__Bacteria.p__Proteobacteria.c__Betaproteobacteria.o__Hydrogenophilales.f__Hydrogenophilaceae.g__Tepidiphilus	k__Bacteria.p__Bacteroidetes.c__Flavobacteriia.o__Flavobacteriales.f__Flavobacteriaceae.g__Flaviramulus
k__Bacteria.p__Proteobacteria.c__Alphaproteobacteria.o__Rhizobiales.f__Rhizobiaceae.g__Agrobacterium	k__Bacteria.p__Proteobacteria.c__Gammaproteobacteria.o__Methylococcales.f__Methylococcaceae.g__Methylococcus
k__Bacteria.p__Proteobacteria.c__Alphaproteobacteria.o__Rhizobiales.f__Brucellaceae.g__Ochrobactrum	k__Bacteria.p__Bacteroidetes.c__Bacteroidia.o__Bacteroidales.f__Prevotellaceae.g__Alloprevotella
k__Bacteria.p__Actinobacteria.c__Actinobacteria.o__Micrococcales.f__Micrococcaceae.g__Paeniglutamicibacter	k__Bacteria.p__Firmicutes.c__Bacilli.o__Bacillales.f__Bacillaceae.g__Geobacillus
k__Bacteria.p__Proteobacteria.c__Deltaproteobacteria.o__Myxococcales.f__Myxococcaceae.g__Myxococcus	k__Archaea.p__Crenarchaeota.c__Thermoprotei.o__Desulfurococcales.f__Desulfurococcaceae.g__Aeropyrum
k__Archaea.p__Euryarchaeota.c__Halobacteria.o__Natrialbales.f__Natrialbaceae.g__Natronococcus	k__Bacteria.p__Bacteroidetes.c__Flavobacteriia.o__Flavobacteriales.f__Crocinitomicaceae.g__Crocinitomix
k__Archaea.p__Euryarchaeota.c__Halobacteria.o__Haloferacales.f__Haloferacaceae.g__Halobellus	k__Bacteria.p__Proteobacteria.c__Alphaproteobacteria.o__Rhizobiales.f__Bradyrhizobiaceae.g__Afipia
k__Bacteria.p__Proteobacteria.c__Alphaproteobacteria.o__Rhodobacterales.f__Rhodobacteraceae.g__Leisingera	k__Bacteria.p__Actinobacteria.c__Actinobacteria.o__Streptosporangiales.f__Nocardiopsaceae.g__Allosalinactinospora
k__Bacteria.p__Proteobacteria.c__Gammaproteobacteria.o__Xanthomonadales.f__Xanthomonadaceae.g__Lysobacter	k__Bacteria.p__Proteobacteria.c__Gammaproteobacteria.o__Enterobacteriales.f__Enterobacteriaceae.g__Citrobacter
k__Bacteria.p__Firmicutes.c__Clostridia.o__Clostridiales.f__Lachnospiraceae.g__Stomatobaculum	k__Bacteria.p__Proteobacteria.c__Gammaproteobacteria.g__Thiolapillus
k__Bacteria.p__Bacteroidetes.c__Flavobacteriia.o__Flavobacteriales.f__Flavobacteriaceae.g__Flaviramulus	k__Bacteria.p__Proteobacteria.c__Betaproteobacteria.o__Burkholderiales.g__Leptothrix
k__Bacteria.p__Proteobacteria.c__Alphaproteobacteria.o__Sphingomonadales.f__Sphingomonadaceae.g__Novosphingobium	k__Bacteria.p__Proteobacteria.c__Deltaproteobacteria.o__Desulfovibrionales.f__Desulfovibrionaceae.g__Bilophila
k__Bacteria.p__Bacteroidetes.c__Bacteroidia.o__Bacteroidales.f__Rikenellaceae.g__Mucinivorans	k__Bacteria.p__Firmicutes.c__Clostridia.o__Clostridiales.f__Caldicoprobacteraceae.g__Caldicoprobacter
k__Bacteria.p__Actinobacteria.c__Actinobacteria.o__Micrococcales.f__Dermacoccaceae.g__Luteipulveratus	k__Bacteria.p__Bacteroidetes.c__Cytophagia.o__Cytophagales.f__Hymenobacteraceae.g__Adhaeribacter
k__Bacteria.p__Proteobacteria.c__Alphaproteobacteria.o__Rickettsiales.f__Rickettsiaceae.g__Rickettsia	k__Bacteria.p__Bacteroidetes.c__Flavobacteriia.o__Flavobacteriales.f__Flavobacteriaceae.g__Weeksella
k__Bacteria.p__Firmicutes.c__Bacilli.o__Bacillales.f__Bacillaceae.g__Oceanobacillus	k__Bacteria.p__Proteobacteria.c__Gammaproteobacteria.o__Chromatiales.f__Ectothiorhodospiraceae.g__Ectothiorhodospira
k__Bacteria.p__Firmicutes.c__Clostridia.o__Clostridiales.f__Ruminococcaceae.g__Ethanoligenens	k__Bacteria.p__Actinobacteria.c__Actinobacteria.o__Pseudonocardiales.f__Pseudonocardiaceae.g__Kibdelosporangium
k__Bacteria.g__Thermobaculum	k__Bacteria.p__Proteobacteria.c__Alphaproteobacteria.o__Rhizobiales.f__Rhizobiaceae.g__Ensifer
k__Bacteria.p__Firmicutes.c__Clostridia.o__Clostridiales.f__Syntrophomonadaceae.g__Syntrophomonas	k__Bacteria.p__Actinobacteria.c__Actinobacteria.o__Micrococcales.f__Microbacteriaceae.g__Curtobacterium
k__Bacteria.p__Proteobacteria.c__Gammaproteobacteria.g__Pseudohongiella	k__Bacteria.p__Firmicutes.c__Clostridia.o__Clostridiales.f__Ruminococcaceae.g__Acetivibrio
k__Archaea.p__Euryarchaeota.c__Archaeoglobi.o__Archaeoglobales.f__Archaeoglobaceae.g__Ferroglobus	k__Bacteria.p__Deinococcus.Thermus.c__Deinococci.o__Thermales.f__Thermaceae.g__Thermus
k__Bacteria.p__Actinobacteria.c__Actinobacteria.o__Pseudonocardiales.f__Pseudonocardiaceae.g__Kibdelosporangium	k__Bacteria.p__Proteobacteria.c__Gammaproteobacteria.o__Vibrionales.f__Vibrionaceae.g__Vibrio
k__Bacteria.p__Fusobacteria.c__Fusobacteriia.o__Fusobacteriales.f__Leptotrichiaceae.g__Sebaldella	k__Bacteria.p__Proteobacteria.c__Alphaproteobacteria.o__Rhodobacterales.f__Rhodobacteraceae.g__Phaeobacter
k__Bacteria.p__Proteobacteria.c__Betaproteobacteria.o__Neisseriales.f__Neisseriaceae.g__Amantichitinum	k__Bacteria.p__Firmicutes.c__Clostridia.o__Clostridiales.f__Clostridiales_Family_XIII._Incertae_Sedis.g__Anaerovorax
k__Bacteria.p__Bacteroidetes.c__Cytophagia.o__Cytophagales.f__Cytophagaceae.g__Cytophaga	k__Bacteria.p__Proteobacteria.c__Gammaproteobacteria.o__Methylococcales.f__Methylococcaceae.g__Methylobacter
k__Bacteria.p__Proteobacteria.c__Gammaproteobacteria.o__Xanthomonadales.f__Rhodanobacteraceae.g__Rudaea	k__Bacteria.p__Chlamydiae.c__Chlamydiia.o__Chlamydiales.f__Parachlamydiaceae.g__Candidatus_Protochlamydia
k__Bacteria.p__Proteobacteria.c__Gammaproteobacteria.o__Cellvibrionales.f__Cellvibrionaceae.g__Marinimicrobium	k__Bacteria.p__Proteobacteria.c__Gammaproteobacteria.o__Cellvibrionales.f__Cellvibrionaceae.g__Marinimicrobium
k__Bacteria.p__Bacteroidetes.c__Cytophagia.o__Cytophagales.f__Cyclobacteriaceae.g__Cyclobacterium	k__Bacteria.p__Firmicutes.c__Clostridia.o__Clostridiales.f__Lachnospiraceae.g__Johnsonella
k__Bacteria.p__Actinobacteria.c__Actinobacteria.o__Catenulisporales.f__Catenulisporaceae.g__Catenulispora	k__Bacteria.p__Proteobacteria.c__Betaproteobacteria.o__Burkholderiales.f__Alcaligenaceae.g__Alcaligenes
k__Bacteria.p__Firmicutes.c__Clostridia.o__Clostridiales.f__Peptostreptococcaceae.g__Filifactor	k__Bacteria.p__Firmicutes.c__Clostridia.o__Clostridiales.f__Peptostreptococcaceae.g__Paeniclostridium
k__Bacteria.p__Proteobacteria.c__Gammaproteobacteria.o__Enterobacteriales.f__Enterobacteriaceae.g__Candidatus_Moranella	k__Bacteria.p__Proteobacteria.c__Betaproteobacteria.o__Rhodocyclales.f__Rhodocyclaceae.g__Thauera
k__Bacteria.p__Bacteroidetes.c__Sphingobacteriia.o__Sphingobacteriales.f__Sphingobacteriaceae.g__Olivibacter	k__Bacteria.p__Proteobacteria.c__Epsilonproteobacteria.o__Campylobacterales.f__Helicobacteraceae.g__Helicobacter
k__Bacteria.p__Chloroflexi.c__Thermomicrobia.o__Sphaerobacterales.f__Sphaerobacteraceae.g__Sphaerobacter	k__Bacteria.p__Acidobacteria.c__Acidobacteriia.o__Acidobacteriales.f__Acidobacteriaceae.g__Granulicella
k__Bacteria.p__Proteobacteria.c__Gammaproteobacteria.o__Oceanospirillales.f__Oceanospirillaceae.g__Marinobacterium	k__Bacteria.p__Proteobacteria.c__Epsilonproteobacteria.o__Nautiliales.f__Nautiliaceae.g__Caminibacter
k__Bacteria.p__Proteobacteria.c__Deltaproteobacteria.o__Desulfuromonadales.f__Geobacteraceae.g__Geopsychrobacter	k__Bacteria.p__Actinobacteria.c__Actinobacteria.o__Micrococcales.f__Microbacteriaceae.g__Leifsonia
k__Bacteria.p__Proteobacteria.c__Betaproteobacteria.o__Burkholderiales.g__Ideonella	k__Bacteria.p__Bacteroidetes.c__Sphingobacteriia.o__Sphingobacteriales.f__Sphingobacteriaceae.g__Olivibacter
k__Bacteria.p__Proteobacteria.c__Gammaproteobacteria.o__Nevskiales.f__Algiphilaceae.g__Algiphilus	k__Bacteria.p__Proteobacteria.c__Gammaproteobacteria.o__Pseudomonadales.f__Pseudomonadaceae.g__Oblitimonas
k__Bacteria.p__Proteobacteria.c__Gammaproteobacteria.o__Enterobacteriales.f__Enterobacteriaceae.g__Candidatus_Blochmannia	k__Bacteria.p__Actinobacteria.c__Actinobacteria.o__Micrococcales.f__Microbacteriaceae.g__Microbacterium
k__Archaea.p__Euryarchaeota.c__Halobacteria.o__Natrialbales.f__Natrialbaceae.g__Halovivax	k__Bacteria.p__Proteobacteria.c__Gammaproteobacteria.o__Chromatiales.f__Chromatiaceae.g__Thiorhodovibrio
k__Bacteria.p__Firmicutes.c__Clostridia.o__Clostridiales.f__Ruminococcaceae.g__Ruminococcus	k__Bacteria.p__Planctomycetes.c__Planctomycetia.o__Planctomycetales.f__Planctomycetaceae.g__Gimesia
k__Bacteria.p__Proteobacteria.c__Betaproteobacteria.o__Gallionellales.f__Gallionellaceae.g__Sideroxydans	k__Bacteria.p__Actinobacteria.c__Actinobacteria.o__Streptosporangiales.f__Streptosporangiaceae.g__Streptosporangium
k__Bacteria.p__Chlorobi.c__Chlorobia.o__Chlorobiales.f__Chlorobiaceae.g__Chloroherpeton	k__Bacteria.p__Actinobacteria.c__Actinobacteria.o__Corynebacteriales.f__Nocardiaceae.g__Smaragdicoccus
k__Archaea.p__Euryarchaeota.g__Aciduliprofundum	k__Bacteria.p__Proteobacteria.c__Betaproteobacteria.o__Burkholderiales.f__Comamonadaceae.g__Caldimonas
k__Archaea.p__Crenarchaeota.c__Thermoprotei.o__Desulfurococcales.f__Desulfurococcaceae.g__Ignicoccus	k__Bacteria.p__Cyanobacteria.o__Chroococcales.g__Cyanobacterium
k__Bacteria.p__Firmicutes.c__Bacilli.o__Bacillales.f__Bacillaceae.g__Sediminibacillus	k__Bacteria.p__Firmicutes.c__Clostridia.o__Clostridiales.f__Ruminococcaceae.g__Mageeibacillus
k__Bacteria.p__Actinobacteria.c__Coriobacteriia.o__Eggerthellales.f__Eggerthellaceae.g__Enterorhabdus	k__Bacteria.p__Chlamydiae.c__Chlamydiia.o__Chlamydiales.f__Parachlamydiaceae.g__Neochlamydia
k__Bacteria.p__Actinobacteria.c__Actinobacteria.o__Micrococcales.f__Promicromonosporaceae.g__Isoptericola	k__Bacteria.p__Fusobacteria.c__Fusobacteriia.o__Fusobacteriales.f__Fusobacteriaceae.g__Ilyobacter
k__Bacteria.p__Bacteroidetes.c__Flavobacteriia.o__Flavobacteriales.f__Flavobacteriaceae.g__Cellulophaga	k__Bacteria.p__Proteobacteria.c__Deltaproteobacteria.o__Bdellovibrionales.f__Bacteriovoracaceae.g__Bacteriovorax
k__Bacteria.p__Proteobacteria.c__Deltaproteobacteria.o__Myxococcales.f__Vulgatibacteraceae.g__Vulgatibacter	k__Bacteria.p__Actinobacteria.c__Actinobacteria.o__Micrococcales.f__Promicromonosporaceae.g__Isoptericola
k__Bacteria.p__Proteobacteria.c__Alphaproteobacteria.o__Rhizobiales.f__Rhodobiaceae.g__Lutibaculum	k__Bacteria.p__Actinobacteria.c__Actinobacteria.o__Micrococcales.f__Micrococcaceae.g__Enteractinococcus
k__Bacteria.p__Bacteroidetes.c__Flavobacteriia.o__Flavobacteriales.f__Flavobacteriaceae.g__Tamlana	k__Bacteria.p__Proteobacteria.c__Alphaproteobacteria.o__Rhodospirillales.f__Rhodospirillaceae.g__Thalassospira
k__Archaea.p__Euryarchaeota.c__Halobacteria.o__Natrialbales.f__Natrialbaceae.g__Natrialba	k__Bacteria.p__Proteobacteria.c__Alphaproteobacteria.o__Rhodobacterales.f__Hyphomonadaceae.g__Ponticaulis
k__Bacteria.p__Firmicutes.c__Bacilli.o__Lactobacillales.f__Leuconostocaceae.g__Leuconostoc	k__Bacteria.p__Proteobacteria.c__Gammaproteobacteria.o__Alteromonadales.f__Idiomarinaceae.g__Idiomarina
k__Bacteria.p__Firmicutes.c__Tissierellia.o__Tissierellales.f__Peptoniphilaceae.g__Helcococcus	k__Bacteria.p__Proteobacteria.c__Gammaproteobacteria.o__Chromatiales.f__Ectothiorhodospiraceae.g__Thioalkalivibrio
k__Bacteria.p__Proteobacteria.c__Alphaproteobacteria.o__Sphingomonadales.f__Sphingomonadaceae.g__Citromicrobium	k__Bacteria.p__Actinobacteria.c__Actinobacteria.o__Catenulisporales.f__Catenulisporaceae.g__Catenulispora
k__Bacteria.p__Actinobacteria.c__Coriobacteriia.o__Coriobacteriales.f__Coriobacteriaceae.g__Enorma	k__Bacteria.p__Proteobacteria.c__Betaproteobacteria.o__Rhodocyclales.f__Rhodocyclaceae.g__Azovibrio
k__Bacteria.p__Firmicutes.c__Bacilli.o__Bacillales.f__Alicyclobacillaceae.g__Alicyclobacillus	k__Bacteria.p__Actinobacteria.c__Actinobacteria.o__Actinopolysporales.f__Actinopolysporaceae.g__Actinopolyspora
k__Bacteria.p__Proteobacteria.c__Alphaproteobacteria.o__Rhodobacterales.f__Rhodobacteraceae.g__Litoreibacter	k__Archaea.p__Euryarchaeota.c__Thermococci.o__Thermococcales.f__Thermococcaceae.g__Thermococcus
k__Bacteria.p__Proteobacteria.c__Alphaproteobacteria.o__Rhodospirillales.f__Rhodospirillaceae.g__Magnetospira	k__Bacteria.p__Bacteroidetes.c__Flavobacteriia.o__Flavobacteriales.f__Flavobacteriaceae.g__Arenitalea
k__Bacteria.p__Firmicutes.c__Clostridia.o__Clostridiales.f__Ruminococcaceae.g__Mageeibacillus	k__Bacteria.p__Proteobacteria.c__Gammaproteobacteria.o__Enterobacteriales.f__Enterobacteriaceae.g__Trabulsiella
k__Bacteria.p__Proteobacteria.c__Gammaproteobacteria.o__Oceanospirillales.f__Saccharospirillaceae.g__Gynuella	k__Bacteria.p__Firmicutes.c__Clostridia.o__Clostridiales.f__Lachnospiraceae.g__Stomatobaculum
k__Bacteria.p__Actinobacteria.c__Actinobacteria.o__Frankiales.f__Cryptosporangiaceae.g__Cryptosporangium	k__Bacteria.p__Proteobacteria.c__Alphaproteobacteria.o__Rhodobacterales.f__Rhodobacteraceae.g__Falsirhodobacter
k__Bacteria.p__Spirochaetes.c__Spirochaetia.o__Spirochaetales.f__Spirochaetaceae.g__Sphaerochaeta	k__Bacteria.p__Cyanobacteria.o__Oscillatoriales.g__Microcoleus
k__Bacteria.p__Proteobacteria.c__Alphaproteobacteria.o__Rickettsiales.f__Candidatus_Paracaedibacteraceae.g__Candidatus_Paracaedibacter	k__Bacteria.p__Proteobacteria.c__Alphaproteobacteria.o__Sphingomonadales.f__Sphingomonadaceae.g__Zymomonas
k__Bacteria.p__Bacteroidetes.c__Bacteroidia.o__Bacteroidales.f__Porphyromonadaceae.g__Dysgonomonas	k__Bacteria.p__Proteobacteria.c__Alphaproteobacteria.o__Rhodospirillales.f__Acetobacteraceae.g__Acidiphilium
k__Bacteria.p__Spirochaetes.c__Spirochaetia.o__Spirochaetales.f__Borreliaceae.g__Borreliella	k__Bacteria.p__Firmicutes.c__Bacilli.o__Lactobacillales.f__Enterococcaceae.g__Enterococcus
k__Bacteria.p__Proteobacteria.c__Betaproteobacteria.o__Ferrovales.f__Ferrovaceae.g__Ferrovum	k__Bacteria.p__Nitrospirae.c__Nitrospira.o__Nitrospirales.f__Nitrospiraceae.g__Leptospirillum
k__Bacteria.p__Firmicutes.c__Clostridia.o__Clostridiales.f__Peptostreptococcaceae.g__Paraclostridium	k__Bacteria.p__Proteobacteria.c__Gammaproteobacteria.o__Enterobacteriales.f__Enterobacteriaceae.g__Wigglesworthia
k__Bacteria.p__Proteobacteria.c__Deltaproteobacteria.o__Myxococcales.f__Cystobacteraceae.g__Stigmatella	k__Bacteria.p__Proteobacteria.c__Zetaproteobacteria.o__Mariprofundales.f__Mariprofundaceae.g__Mariprofundus
k__Bacteria.p__Firmicutes.c__Bacilli.o__Lactobacillales.f__Carnobacteriaceae.g__Alloiococcus	k__Bacteria.p__Proteobacteria.c__Alphaproteobacteria.o__Rhodospirillales.f__Rhodospirillaceae.g__Magnetospira
k__Bacteria.p__Bacteroidetes.c__Cytophagia.o__Cytophagales.f__Flammeovirgaceae.g__Nafulsella	k__Bacteria.p__Bacteroidetes.c__Flavobacteriia.o__Flavobacteriales.f__Flavobacteriaceae.g__Gaetbulibacter
k__Archaea.p__Euryarchaeota.c__Methanomicrobia.o__Methanosarcinales.f__Methanosarcinaceae.g__Methanohalobium	k__Bacteria.p__Actinobacteria.c__Actinobacteria.o__Corynebacteriales.g__Hoyosella
k__Bacteria.p__Proteobacteria.c__Gammaproteobacteria.o__Aeromonadales.f__Succinivibrionaceae.g__Succinimonas	k__Bacteria.p__Proteobacteria.c__Alphaproteobacteria.o__Rhodobacterales.f__Rhodobacteraceae.g__Sagittula
k__Bacteria.p__Proteobacteria.c__Gammaproteobacteria.o__Thiotrichales.f__Piscirickettsiaceae.g__Thioalkalimicrobium	k__Bacteria.p__Proteobacteria.c__Alphaproteobacteria.o__Rhizobiales.f__Bradyrhizobiaceae.g__Salinarimonas
k__Bacteria.p__Proteobacteria.c__Gammaproteobacteria.o__Chromatiales.f__Halothiobacillaceae.g__Halothiobacillus	k__Bacteria.p__Actinobacteria.c__Actinobacteria.o__Micrococcales.f__Intrasporangiaceae.g__Tetrasphaera
k__Bacteria.p__Actinobacteria.c__Actinobacteria.o__Micrococcales.f__Microbacteriaceae.g__Microterricola	k__Archaea.p__Euryarchaeota.c__Halobacteria.o__Natrialbales.f__Natrialbaceae.g__Natrialba
k__Bacteria.p__Fusobacteria.c__Fusobacteriia.o__Fusobacteriales.f__Fusobacteriaceae.g__Ilyobacter	k__Bacteria.p__Proteobacteria.c__Alphaproteobacteria.o__Rickettsiales.f__Anaplasmataceae.g__Anaplasma
k__Bacteria.p__Proteobacteria.c__Gammaproteobacteria.o__Oceanospirillales.f__Saccharospirillaceae.g__Saccharospirillum	k__Archaea.p__Crenarchaeota.c__Thermoprotei.o__Desulfurococcales.f__Desulfurococcaceae.g__Ignicoccus
k__Bacteria.p__Planctomycetes.c__Planctomycetia.o__Planctomycetales.f__Planctomycetaceae.g__Planctopirus	k__Bacteria.p__Bacteroidetes.c__Cytophagia.o__Cytophagales.f__Cytophagaceae.g__Spirosoma
k__Bacteria.p__Proteobacteria.c__Betaproteobacteria.o__Burkholderiales.g__Xylophilus	k__Bacteria.p__Proteobacteria.c__Gammaproteobacteria.o__Cardiobacteriales.f__Cardiobacteriaceae.g__Dichelobacter
k__Bacteria.p__Bacteroidetes.c__Bacteroidia.o__Bacteroidales.g__Phocaeicola	k__Bacteria.p__Cyanobacteria.o__Oscillatoriales.g__Crinalium
k__Bacteria.p__Proteobacteria.c__Gammaproteobacteria.o__Oceanospirillales.f__Oceanospirillaceae.g__Nitrincola	k__Bacteria.p__Firmicutes.c__Bacilli.o__Bacillales.f__Planococcaceae.g__Paenisporosarcina
k__Bacteria.p__Firmicutes.c__Bacilli.o__Bacillales.f__Paenibacillaceae.g__Aneurinibacillus	k__Bacteria.p__Thermodesulfobacteria.c__Thermodesulfobacteria.o__Thermodesulfobacteriales.f__Thermodesulfobacteriaceae.g__Thermodesulfatator
k__Bacteria.p__Proteobacteria.c__Gammaproteobacteria.f__Competibacteraceae.g__Candidatus_Contendobacter	k__Bacteria.p__Proteobacteria.c__Betaproteobacteria.o__Burkholderiales.f__Comamonadaceae.g__Polaromonas
k__Bacteria.p__Firmicutes.c__Clostridia.o__Clostridiales.g__Epulopiscium	k__Bacteria.p__Proteobacteria.c__Alphaproteobacteria.o__Rhodobacterales.f__Rhodobacteraceae.g__Ketogulonicigenium
k__Bacteria.p__Firmicutes.c__Bacilli.o__Bacillales.f__Paenibacillaceae.g__Gorillibacterium	k__Bacteria.p__Firmicutes.c__Erysipelotrichia.o__Erysipelotrichales.f__Erysipelotrichaceae.g__Allobaculum
k__Bacteria.p__Actinobacteria.c__Actinobacteria.o__Micrococcales.f__Microbacteriaceae.g__Candidatus_Aquiluna	k__Bacteria.p__Proteobacteria.c__Betaproteobacteria.o__Neisseriales.f__Neisseriaceae.g__Simonsiella
k__Bacteria.p__Proteobacteria.c__Gammaproteobacteria.o__Cellvibrionales.f__Cellvibrionaceae.g__Saccharophagus	k__Bacteria.p__Proteobacteria.c__Gammaproteobacteria.o__Aeromonadales.f__Aeromonadaceae.g__Tolumonas
k__Bacteria.p__Acidobacteria.c__Blastocatellia.g__Pyrinomonas	k__Bacteria.p__Firmicutes.c__Clostridia.o__Clostridiales.f__Clostridiaceae.g__Proteiniclasticum
k__Bacteria.p__Proteobacteria.c__Gammaproteobacteria.o__Thiotrichales.f__Piscirickettsiaceae.g__Piscirickettsia	k__Bacteria.p__Proteobacteria.c__Alphaproteobacteria.o__Rhizobiales.f__Aurantimonadaceae.g__Martelella
k__Archaea.p__Euryarchaeota.c__Thermococci.o__Thermococcales.f__Thermococcaceae.g__Thermococcus	k__Archaea.p__Euryarchaeota.c__Halobacteria.o__Natrialbales.f__Natrialbaceae.g__Halovivax
k__Bacteria.p__Proteobacteria.c__Betaproteobacteria.o__Gallionellales.f__Gallionellaceae.g__Ferriphaselus	k__Bacteria.p__Firmicutes.c__Clostridia.o__Clostridiales.f__Clostridiaceae.g__Anaerosalibacter
k__Bacteria.p__Proteobacteria.c__Alphaproteobacteria.o__Rhodobacterales.f__Rhodobacteraceae.g__Rhodobacter	k__Bacteria.p__Proteobacteria.c__Alphaproteobacteria.o__Rhodospirillales.f__Rhodospirillaceae.g__Rhodovibrio
k__Bacteria.p__Proteobacteria.c__Epsilonproteobacteria.o__Campylobacterales.f__Campylobacteraceae.g__Campylobacter	k__Bacteria.p__Proteobacteria.c__Betaproteobacteria.o__Burkholderiales.f__Comamonadaceae.g__Rhodoferax
k__Bacteria.p__Bacteroidetes.c__Flavobacteriia.o__Flavobacteriales.f__Flavobacteriaceae.g__Robiginitalea	k__Bacteria.p__Proteobacteria.c__Gammaproteobacteria.o__Enterobacteriales.f__Enterobacteriaceae.g__Photorhabdus
k__Bacteria.p__Proteobacteria.c__Deltaproteobacteria.g__Candidatus_Babela	k__Bacteria.p__Proteobacteria.c__Betaproteobacteria.o__Burkholderiales.f__Oxalobacteraceae.g__Janthinobacterium
k__Bacteria.p__Cyanobacteria.o__Nostocales.f__Nostocaceae.g__Cylindrospermum	k__Bacteria.p__Proteobacteria.c__Gammaproteobacteria.o__Alteromonadales.f__Moritellaceae.g__Moritella
k__Bacteria.p__Proteobacteria.c__Gammaproteobacteria.o__Enterobacteriales.f__Enterobacteriaceae.g__Shimwellia	k__Bacteria.p__Chloroflexi.c__Ktedonobacteria.o__Thermogemmatisporales.f__Thermogemmatisporaceae.g__Thermogemmatispora
k__Bacteria.p__Bacteroidetes.c__Flavobacteriia.o__Flavobacteriales.f__Flavobacteriaceae.g__Elizabethkingia	k__Archaea.p__Euryarchaeota.c__Halobacteria.o__Natrialbales.f__Natrialbaceae.g__Haloterrigena
k__Bacteria.p__Armatimonadetes.c__Fimbriimonadia.o__Fimbriimonadales.f__Fimbriimonadaceae.g__Fimbriimonas	k__Archaea.p__Euryarchaeota.c__Archaeoglobi.o__Archaeoglobales.f__Archaeoglobaceae.g__Ferroglobus
k__Bacteria.p__Actinobacteria.c__Actinobacteria.o__Micrococcales.f__Cellulomonadaceae.g__Actinotalea	k__Bacteria.p__Proteobacteria.c__Deltaproteobacteria.o__Desulfovibrionales.f__Desulfovibrionaceae.g__Desulfocurvus
k__Bacteria.p__Cyanobacteria.o__Stigonematales.g__Mastigocoleus	k__Bacteria.p__Bacteroidetes.c__Chitinophagia.o__Chitinophagales.f__Chitinophagaceae.g__Flavisolibacter
k__Bacteria.p__Ignavibacteriae.c__Ignavibacteria.o__Ignavibacteriales.f__Ignavibacteriaceae.g__Ignavibacterium	k__Archaea.p__Euryarchaeota.c__Halobacteria.o__Halobacteriales.f__Halobacteriaceae.g__Haladaptatus
k__Bacteria.p__Bacteroidetes.c__Flavobacteriia.o__Flavobacteriales.f__Flavobacteriaceae.g__Nonlabens	k__Bacteria.p__Firmicutes.c__Bacilli.o__Bacillales.f__Bacillaceae.g__Bacillus
k__Bacteria.p__Bacteroidetes.c__Cytophagia.o__Cytophagales.f__Cyclobacteriaceae.g__Cecembia	k__Archaea.p__Candidatus_Korarchaeota.g__Candidatus_Korarchaeum
k__Bacteria.p__Proteobacteria.c__Alphaproteobacteria.o__Rhizobiales.f__Methylobacteriaceae.g__Methylobacterium	k__Bacteria.p__Actinobacteria.c__Thermoleophilia.o__Solirubrobacterales.f__Conexibacteraceae.g__Conexibacter
k__Bacteria.p__Actinobacteria.c__Actinobacteria.o__Kineosporiales.f__Kineosporiaceae.g__Angustibacter	k__Bacteria.p__Firmicutes.c__Clostridia.o__Clostridiales.f__Heliobacteriaceae.g__Heliobacterium
k__Bacteria.p__Proteobacteria.c__Gammaproteobacteria.o__Methylococcales.f__Methylococcaceae.g__Methylomonas	k__Bacteria.p__Firmicutes.c__Bacilli.o__Bacillales.f__Bacillaceae.g__Anoxybacillus
k__Bacteria.p__Proteobacteria.c__Alphaproteobacteria.o__Rhodospirillales.f__Acetobacteraceae.g__Gluconobacter	k__Bacteria.p__Proteobacteria.c__Alphaproteobacteria.o__Rhizobiales.f__Phyllobacteriaceae.g__Pseudaminobacter
k__Bacteria.p__Firmicutes.c__Bacilli.o__Bacillales.f__Staphylococcaceae.g__Macrococcus	k__Bacteria.p__Proteobacteria.c__Gammaproteobacteria.o__Enterobacteriales.f__Enterobacteriaceae.g__Rahnella
k__Bacteria.p__Proteobacteria.c__Gammaproteobacteria.o__Alteromonadales.f__Alteromonadaceae.g__Paraglaciecola	k__Bacteria.p__Actinobacteria.c__Actinobacteria.o__Micromonosporales.f__Micromonosporaceae.g__Actinocatenispora
k__Bacteria.p__Cyanobacteria.o__Prochlorales.f__Prochlorotrichaceae.g__Prochlorothrix	k__Bacteria.p__Planctomycetes.c__Planctomycetia.o__Planctomycetales.f__Planctomycetaceae.g__Blastopirellula
k__Bacteria.p__Proteobacteria.c__Gammaproteobacteria.o__Methylococcales.f__Methylococcaceae.g__Methylococcus	k__Bacteria.p__Proteobacteria.c__Betaproteobacteria.o__Burkholderiales.f__Comamonadaceae.g__Pelomonas
k__Bacteria.p__Deferribacteres.c__Deferribacteres.o__Deferribacterales.f__Deferribacteraceae.g__Calditerrivibrio	k__Bacteria.p__Proteobacteria.c__Alphaproteobacteria.o__Rhizobiales.f__Phyllobacteriaceae.g__Chelativorans
k__Bacteria.p__Proteobacteria.c__Betaproteobacteria.o__Burkholderiales.f__Alcaligenaceae.g__Oligella	k__Bacteria.p__Proteobacteria.c__Alphaproteobacteria.o__Rhodobacterales.f__Rhodobacteraceae.g__Oceaniovalibus
k__Bacteria.p__Proteobacteria.c__Gammaproteobacteria.o__Cellvibrionales.f__Halieaceae.g__Luminiphilus	k__Bacteria.p__Thermotogae.c__Thermotogae.o__Mesoaciditogales.f__Mesoaciditogaceae.g__Mesoaciditoga
k__Bacteria.p__Thermodesulfobacteria.c__Thermodesulfobacteria.o__Thermodesulfobacteriales.f__Thermodesulfobacteriaceae.g__Caldimicrobium	k__Bacteria.p__Proteobacteria.c__Betaproteobacteria.o__Burkholderiales.f__Oxalobacteraceae.g__Herminiimonas
k__Bacteria.p__Proteobacteria.c__Betaproteobacteria.o__Neisseriales.f__Neisseriaceae.g__Stenoxybacter	k__Bacteria.p__Actinobacteria.c__Acidimicrobiia.o__Acidimicrobiales.f__Acidimicrobiaceae.g__Ilumatobacter
k__Bacteria.p__Cyanobacteria.o__Prochlorales.f__Prochlorococcaceae.g__Prochlorococcus	k__Bacteria.p__Proteobacteria.c__Deltaproteobacteria.o__Syntrophobacterales.f__Syntrophaceae.g__Desulfomonile
k__Bacteria.p__Proteobacteria.c__Alphaproteobacteria.o__Rhodospirillales.f__Rhodospirillaceae.g__Niveispirillum	k__Archaea.p__Euryarchaeota.c__Thermococci.o__Thermococcales.f__Thermococcaceae.g__Palaeococcus
k__Bacteria.p__Firmicutes.c__Clostridia.o__Clostridiales.f__Clostridiales_Family_XVII._Incertae_Sedis.g__Sulfobacillus	k__Bacteria.p__Firmicutes.c__Clostridia.o__Clostridiales.f__Clostridiales_Family_XVII._Incertae_Sedis.g__Sulfobacillus
k__Bacteria.p__Bacteroidetes.c__Cytophagia.o__Cytophagales.f__Hymenobacteraceae.g__Rufibacter	k__Bacteria.p__Actinobacteria.c__Actinobacteria.o__Micrococcales.f__Microbacteriaceae.g__Agreia
k__Bacteria.p__Proteobacteria.c__Gammaproteobacteria.o__Alteromonadales.f__Alteromonadaceae.g__Aestuariibacter	k__Bacteria.p__Proteobacteria.c__Alphaproteobacteria.o__Rhizobiales.f__Xanthobacteraceae.g__Azorhizobium
k__Bacteria.p__Firmicutes.c__Bacilli.o__Bacillales.f__Listeriaceae.g__Brochothrix	k__Bacteria.p__Synergistetes.c__Synergistia.o__Synergistales.f__Synergistaceae.g__Synergistes
k__Bacteria.p__Proteobacteria.c__Gammaproteobacteria.o__Oceanospirillales.f__Oceanospirillaceae.g__Oceanospirillum	k__Bacteria.p__Bacteroidetes.c__Flavobacteriia.o__Flavobacteriales.f__Flavobacteriaceae.g__Dokdonia
k__Bacteria.p__Actinobacteria.c__Actinobacteria.o__Propionibacteriales.f__Nocardioidaceae.g__Actinopolymorpha	k__Bacteria.p__Actinobacteria.c__Actinobacteria.o__Micrococcales.f__Microbacteriaceae.g__Humibacter
k__Bacteria.p__Proteobacteria.c__Alphaproteobacteria.o__Rhodospirillales.g__Elioraea	k__Bacteria.p__Bacteroidetes.c__Chitinophagia.o__Chitinophagales.f__Saprospiraceae.g__Lewinella
k__Bacteria.p__Proteobacteria.c__Betaproteobacteria.o__Neisseriales.f__Chromobacteriaceae.g__Microvirgula	k__Bacteria.p__Bacteroidetes.c__Cytophagia.o__Cytophagales.f__Flammeovirgaceae.g__Nafulsella
k__Bacteria.p__Actinobacteria.c__Actinobacteria.o__Actinomycetales.f__Actinomycetaceae.g__Actinomyces	k__Bacteria.p__Actinobacteria.c__Actinobacteria.o__Micrococcales.f__Intrasporangiaceae.g__Serinicoccus
k__Bacteria.p__Proteobacteria.c__Gammaproteobacteria.o__Pseudomonadales.f__Moraxellaceae.g__Acinetobacter	k__Bacteria.p__Firmicutes.c__Clostridia.o__Clostridiales.f__Ruminococcaceae.g__Ruminococcus
k__Bacteria.p__Proteobacteria.c__Alphaproteobacteria.o__Rhodobacterales.f__Rhodobacteraceae.g__Sediminimonas	k__Bacteria.p__Proteobacteria.c__Deltaproteobacteria.o__Desulfovibrionales.f__Desulfohalobiaceae.g__Desulfonatronovibrio
k__Bacteria.p__Proteobacteria.c__Gammaproteobacteria.o__Legionellales.f__Legionellaceae.g__Fluoribacter	k__Bacteria.p__Proteobacteria.c__Gammaproteobacteria.o__Cellvibrionales.f__Spongiibacteraceae.g__Dasania
k__Bacteria.p__Cyanobacteria.o__Oscillatoriales.g__Spirulina	k__Bacteria.p__Firmicutes.c__Negativicutes.o__Selenomonadales.f__Selenomonadaceae.g__Propionispira
k__Bacteria.p__Proteobacteria.c__Gammaproteobacteria.g__Candidatus_Ruthia	k__Bacteria.p__Proteobacteria.c__Betaproteobacteria.o__Burkholderiales.g__Ideonella
k__Bacteria.p__Actinobacteria.c__Actinobacteria.o__Micrococcales.f__Micrococcaceae.g__Nesterenkonia	k__Archaea.p__Euryarchaeota.c__Halobacteria.o__Natrialbales.f__Natrialbaceae.g__Halopiger
k__Bacteria.p__Proteobacteria.c__Gammaproteobacteria.o__Thiotrichales.f__Piscirickettsiaceae.g__Cycloclasticus	k__Bacteria.p__Actinobacteria.c__Nitriliruptoria.o__Nitriliruptorales.f__Nitriliruptoraceae.g__Nitriliruptor
k__Bacteria.p__Proteobacteria.c__Alphaproteobacteria.o__Rhodospirillales.f__Rhodospirillaceae.g__Haematospirillum	k__Bacteria.p__Cyanobacteria.o__Prochlorales.f__Prochlorotrichaceae.g__Prochlorothrix
k__Bacteria.p__Bacteroidetes.c__Cytophagia.o__Cytophagales.f__Cytophagaceae.g__Flexibacter	k__Bacteria.p__Proteobacteria.c__Alphaproteobacteria.o__Sphingomonadales.f__Sphingomonadaceae.g__Sphingobium
k__Bacteria.p__Proteobacteria.c__Alphaproteobacteria.o__Rhodobacterales.f__Rhodobacteraceae.g__Defluviimonas	k__Bacteria.p__Proteobacteria.c__Betaproteobacteria.o__Burkholderiales.f__Alcaligenaceae.g__Bordetella
k__Bacteria.p__Proteobacteria.c__Alphaproteobacteria.o__Rhizobiales.f__Rhodobiaceae.g__Candidatus_Phaeomarinobacter	k__Bacteria.p__Firmicutes.c__Bacilli.o__Bacillales.f__Bacillaceae.g__Terribacillus
k__Bacteria.p__Proteobacteria.c__Alphaproteobacteria.o__Rhodospirillales.f__Rhodospirillaceae.g__Novispirillum	k__Bacteria.p__Proteobacteria.c__Alphaproteobacteria.o__Rhodospirillales.f__Rhodospirillaceae.g__Haematospirillum
k__Bacteria.p__Acidobacteria.c__Acidobacteriia.o__Acidobacteriales.f__Acidobacteriaceae.g__Acidobacterium	k__Bacteria.p__Bacteroidetes.c__Cytophagia.o__Cytophagales.f__Persicobacteraceae.g__Persicobacter
k__Bacteria.p__Proteobacteria.c__Gammaproteobacteria.f__Competibacteraceae.g__Candidatus_Competibacter	k__Bacteria.p__Proteobacteria.c__Alphaproteobacteria.o__Rhodobacterales.f__Rhodobacteraceae.g__Roseibacterium
k__Bacteria.p__Firmicutes.c__Bacilli.o__Lactobacillales.f__Lactobacillaceae.g__Pediococcus	k__Bacteria.p__Proteobacteria.c__Alphaproteobacteria.o__Sneathiellales.f__Sneathiellaceae.g__Sneathiella
k__Bacteria.p__Firmicutes.c__Clostridia.o__Clostridiales.f__Lachnospiraceae.g__Lachnobacterium	k__Bacteria.p__Proteobacteria.c__Gammaproteobacteria.o__Xanthomonadales.f__Xanthomonadaceae.g__Xanthomonas
k__Archaea.p__Euryarchaeota.c__Thermoplasmata.o__Methanomassiliicoccales.f__Methanomassiliicoccaceae.g__Candidatus_Methanoplasma	k__Bacteria.p__Bacteroidetes.c__Bacteroidia.o__Bacteroidales.f__Rikenellaceae.g__Alistipes
k__Bacteria.p__Firmicutes.c__Clostridia.o__Clostridiales.f__Eubacteriaceae.g__Anaerofustis	k__Bacteria.p__Planctomycetes.c__Planctomycetia.o__Planctomycetales.f__Planctomycetaceae.g__Planctopirus
k__Bacteria.p__Proteobacteria.c__Gammaproteobacteria.o__Thiotrichales.g__Fangia	k__Bacteria.p__Bacteroidetes.c__Cytophagia.o__Cytophagales.f__Cytophagaceae.g__Flectobacillus
k__Bacteria.p__Proteobacteria.c__Gammaproteobacteria.o__Nevskiales.f__Sinobacteraceae.g__Nevskia	k__Bacteria.p__Actinobacteria.c__Actinobacteria.o__Micrococcales.f__Microbacteriaceae.g__Yonghaparkia
k__Bacteria.p__Proteobacteria.c__Gammaproteobacteria.o__Enterobacteriales.f__Enterobacteriaceae.g__Xenorhabdus	k__Bacteria.p__Proteobacteria.c__Gammaproteobacteria.o__Enterobacteriales.f__Enterobacteriaceae.g__Kluyvera
k__Bacteria.p__Proteobacteria.c__Gammaproteobacteria.o__Xanthomonadales.f__Xanthomonadaceae.g__Stenotrophomonas	k__Bacteria.p__Bacteroidetes.c__Bacteroidia.o__Bacteroidales.f__Porphyromonadaceae.g__Coprobacter
k__Bacteria.p__Firmicutes.c__Bacilli.o__Bacillales.f__Planococcaceae.g__Bhargavaea	k__Bacteria.p__Bacteroidetes.c__Cytophagia.o__Cytophagales.f__Flammeovirgaceae.g__Cesiribacter
k__Bacteria.p__Proteobacteria.c__Alphaproteobacteria.o__Rhizobiales.f__Beijerinckiaceae.g__Methylocella	k__Bacteria.p__Proteobacteria.c__Gammaproteobacteria.o__Chromatiales.f__Chromatiaceae.g__Arsukibacterium
k__Bacteria.p__Proteobacteria.c__Betaproteobacteria.g__Candidatus_Profftella	k__Bacteria.p__Actinobacteria.c__Actinobacteria.o__Micromonosporales.f__Micromonosporaceae.g__Catenuloplanes
k__Bacteria.p__Proteobacteria.c__Alphaproteobacteria.o__Sphingomonadales.f__Erythrobacteraceae.g__Croceicoccus	k__Bacteria.p__Proteobacteria.c__Alphaproteobacteria.o__Rhodobacterales.f__Rhodobacteraceae.g__Defluviimonas
k__Bacteria.p__Proteobacteria.c__Gammaproteobacteria.o__Enterobacteriales.f__Enterobacteriaceae.g__Plesiomonas	k__Bacteria.p__Proteobacteria.c__Alphaproteobacteria.o__Rhizobiales.f__Phyllobacteriaceae.g__Hoeflea
k__Bacteria.p__Actinobacteria.c__Actinobacteria.o__Corynebacteriales.f__Mycobacteriaceae.g__Amycolicicoccus	k__Bacteria.p__Proteobacteria.c__Betaproteobacteria.o__Burkholderiales.f__Comamonadaceae.g__Brachymonas
k__Bacteria.p__Proteobacteria.c__Betaproteobacteria.o__Neisseriales.f__Neisseriaceae.g__Snodgrassella	k__Bacteria.p__Bacteroidetes.c__Flavobacteriia.o__Flavobacteriales.f__Flavobacteriaceae.g__Leeuwenhoekiella
k__Archaea.p__Crenarchaeota.c__Thermoprotei.o__Desulfurococcales.f__Pyrodictiaceae.g__Pyrodictium	k__Bacteria.p__Proteobacteria.c__Gammaproteobacteria.o__Oceanospirillales.f__Halomonadaceae.g__Candidatus_Evansia
k__Bacteria.p__Proteobacteria.c__Alphaproteobacteria.o__Rhodobacterales.f__Rhodobacteraceae.g__Sulfitobacter	k__Bacteria.p__Synergistetes.c__Synergistia.o__Synergistales.f__Synergistaceae.g__Thermovirga
k__Bacteria.p__Actinobacteria.c__Coriobacteriia.o__Coriobacteriales.f__Coriobacteriaceae.g__Senegalimassilia	k__Bacteria.p__Proteobacteria.c__Alphaproteobacteria.o__Rhodobacterales.f__Hyphomonadaceae.g__Robiginitomaculum
k__Bacteria.p__Proteobacteria.c__Gammaproteobacteria.o__Xanthomonadales.f__Rhodanobacteraceae.g__Mizugakiibacter	k__Bacteria.p__Bacteroidetes.c__Flavobacteriia.o__Flavobacteriales.f__Flavobacteriaceae.g__Zhouia
k__Bacteria.p__Actinobacteria.c__Actinobacteria.o__Micrococcales.f__Dermatophilaceae.g__Austwickia	k__Bacteria.p__Proteobacteria.c__Alphaproteobacteria.g__Geminicoccus
k__Bacteria.p__Firmicutes.c__Bacilli.o__Bacillales.f__Bacillaceae.g__Fictibacillus	k__Bacteria.p__Synergistetes.c__Synergistia.o__Synergistales.f__Synergistaceae.g__Pyramidobacter
k__Bacteria.p__Proteobacteria.c__Betaproteobacteria.o__Neisseriales.f__Neisseriaceae.g__Vitreoscilla	k__Bacteria.p__Proteobacteria.c__Alphaproteobacteria.o__Rhizobiales.f__Hyphomicrobiaceae.g__Rhodoplanes
k__Bacteria.p__Firmicutes.c__Bacilli.o__Bacillales.f__Sporolactobacillaceae.g__Sporolactobacillus	k__Archaea.p__Euryarchaeota.c__Methanomicrobia.o__Methanosarcinales.f__Methanosarcinaceae.g__Methanohalobium
k__Bacteria.p__Proteobacteria.c__Gammaproteobacteria.o__Oceanospirillales.f__Hahellaceae.g__Hahella	k__Bacteria.p__Proteobacteria.c__Betaproteobacteria.o__Burkholderiales.g__Thiomonas
k__Bacteria.p__Bacteroidetes.c__Cytophagia.o__Cytophagales.f__Cyclobacteriaceae.g__Lunatimonas	k__Bacteria.p__Proteobacteria.c__Alphaproteobacteria.o__Rhizobiales.f__Phyllobacteriaceae.g__Paramesorhizobium
k__Bacteria.p__Proteobacteria.c__Gammaproteobacteria.o__Enterobacteriales.f__Enterobacteriaceae.g__Erwinia	k__Bacteria.p__Planctomycetes.c__Planctomycetia.o__Planctomycetales.f__Planctomycetaceae.g__Rubinisphaera
k__Bacteria.p__Bacteroidetes.c__Flavobacteriia.o__Flavobacteriales.f__Flavobacteriaceae.g__Muricauda	k__Bacteria.p__Proteobacteria.c__Betaproteobacteria.o__Neisseriales.f__Neisseriaceae.g__Crenobacter
k__Bacteria.p__Verrucomicrobia.c__Spartobacteria.g__Terrimicrobium	k__Bacteria.p__Firmicutes.c__Clostridia.o__Clostridiales.f__Peptococcaceae.g__Desulfitibacter
k__Bacteria.p__Firmicutes.c__Erysipelotrichia.o__Erysipelotrichales.f__Erysipelotrichaceae.g__Turicibacter	k__Bacteria.p__Bacteroidetes.c__Bacteroidia.o__Bacteroidales.f__Prolixibacteraceae.g__Prolixibacter
k__Bacteria.p__Acidobacteria.c__Acidobacteriia.o__Acidobacteriales.f__Acidobacteriaceae.g__Candidatus_Koribacter	k__Bacteria.p__Bacteroidetes.c__Flavobacteriia.o__Flavobacteriales.f__Flavobacteriaceae.g__Psychroflexus
k__Bacteria.p__Proteobacteria.c__Betaproteobacteria.o__Burkholderiales.f__Comamonadaceae.g__Pseudorhodoferax	k__Bacteria.p__Firmicutes.c__Clostridia.o__Thermoanaerobacterales.f__Thermodesulfobiaceae.g__Thermodesulfobium
k__Bacteria.p__Actinobacteria.c__Actinobacteria.o__Micrococcales.f__Intrasporangiaceae.g__Janibacter	k__Bacteria.p__Bacteroidetes.c__Cytophagia.o__Cytophagales.f__Flammeovirgaceae.g__Fulvivirga
k__Bacteria.p__Actinobacteria.c__Actinobacteria.o__Micrococcales.f__Dermabacteraceae.g__Helcobacillus	k__Bacteria.p__Cyanobacteria.o__Stigonematales.g__Mastigocoleus
k__Bacteria.p__Proteobacteria.c__Betaproteobacteria.o__Gallionellales.f__Gallionellaceae.g__Gallionella	k__Archaea.p__Euryarchaeota.c__Methanomicrobia.o__Methanomicrobiales.f__Methanoregulaceae.g__Methanoregula
k__Archaea.p__Crenarchaeota.c__Thermoprotei.o__Desulfurococcales.f__Pyrodictiaceae.g__Pyrolobus	k__Bacteria.p__Actinobacteria.c__Actinobacteria.o__Propionibacteriales.f__Propionibacteriaceae.g__Granulicoccus
k__Bacteria.p__Firmicutes.c__Negativicutes.o__Selenomonadales.f__Selenomonadaceae.g__Centipeda	k__Bacteria.p__Proteobacteria.c__Alphaproteobacteria.o__Rhodobacterales.f__Rhodobacteraceae.g__Leisingera
k__Bacteria.p__Actinobacteria.c__Actinobacteria.o__Corynebacteriales.f__Mycobacteriaceae.g__Mycobacterium	k__Bacteria.p__Proteobacteria.c__Alphaproteobacteria.o__Caulobacterales.f__Caulobacteraceae.g__Woodsholea
k__Archaea.p__Euryarchaeota.c__Methanococci.o__Methanococcales.f__Methanococcaceae.g__Methanococcus	k__Archaea.p__Euryarchaeota.c__Halobacteria.o__Halobacteriales.f__Halobacteriaceae.g__Candidatus_Halobonum
k__Bacteria.p__Proteobacteria.c__Alphaproteobacteria.g__Candidatus_Puniceispirillum	k__Bacteria.p__Proteobacteria.c__Alphaproteobacteria.o__Rhizobiales.f__Hyphomicrobiaceae.g__Blastochloris
k__Bacteria.p__Firmicutes.c__Bacilli.o__Bacillales.f__Bacillaceae.g__Bacillus	k__Bacteria.p__Planctomycetes.c__Planctomycetia.o__Planctomycetales.f__Isosphaeraceae.g__Singulisphaera
k__Bacteria.p__Actinobacteria.c__Actinobacteria.o__Streptosporangiales.f__Streptosporangiaceae.g__Planomonospora	k__Bacteria.p__Proteobacteria.c__Gammaproteobacteria.o__Methylococcales.f__Methylothermaceae.g__Methylohalobius
k__Bacteria.p__Firmicutes.c__Clostridia.o__Clostridiales.f__Clostridiales_Family_XIII._Incertae_Sedis.g__Anaerovorax	k__Bacteria.p__Proteobacteria.c__Gammaproteobacteria.o__Chromatiales.f__Ectothiorhodospiraceae.g__Thiorhodospira
k__Bacteria.p__Bacteroidetes.c__Bacteroidia.o__Bacteroidales.f__Marinilabiliaceae.g__Alkaliflexus	k__Bacteria.p__Proteobacteria.c__Gammaproteobacteria.o__Oceanospirillales.f__Oceanospirillaceae.g__Marinomonas
k__Bacteria.p__Verrucomicrobia.c__Verrucomicrobiae.o__Verrucomicrobiales.f__Rubritaleaceae.g__Rubritalea	k__Bacteria.p__Proteobacteria.c__Alphaproteobacteria.o__Rhodobacterales.f__Hyphomonadaceae.g__Euryhalocaulis
k__Bacteria.p__Bacteroidetes.c__Flavobacteriia.o__Flavobacteriales.f__Flavobacteriaceae.g__Mangrovimonas	k__Archaea.p__Euryarchaeota.c__Methanomicrobia.o__Methanomicrobiales.f__Methanocorpusculaceae.g__Methanocorpusculum
k__Bacteria.p__Chloroflexi.c__Ktedonobacteria.o__Thermogemmatisporales.f__Thermogemmatisporaceae.g__Thermogemmatispora	k__Archaea.p__Euryarchaeota.c__Archaeoglobi.o__Archaeoglobales.f__Archaeoglobaceae.g__Archaeoglobus
k__Bacteria.p__Firmicutes.c__Clostridia.o__Clostridiales.f__Ruminococcaceae.g__Anaerotruncus	k__Bacteria.p__Proteobacteria.c__Alphaproteobacteria.o__Sphingomonadales.f__Erythrobacteraceae.g__Erythrobacter
k__Bacteria.p__Bacteroidetes.c__Flavobacteriia.o__Flavobacteriales.f__Flavobacteriaceae.g__Empedobacter	k__Bacteria.p__Thermotogae.c__Thermotogae.o__Thermotogales.f__Fervidobacteriaceae.g__Thermosipho
k__Bacteria.p__Proteobacteria.c__Gammaproteobacteria.o__Enterobacteriales.f__Enterobacteriaceae.g__Kosakonia	k__Bacteria.p__Firmicutes.c__Bacilli.o__Bacillales.f__Paenibacillaceae.g__Brevibacillus
k__Bacteria.p__Firmicutes.c__Negativicutes.o__Selenomonadales.f__Selenomonadaceae.g__Propionispira	k__Archaea.p__Thaumarchaeota.g__Candidatus_Nitrosopelagicus
k__Bacteria.p__Proteobacteria.c__Gammaproteobacteria.o__Oceanospirillales.f__Halomonadaceae.g__Candidatus_Evansia	k__Archaea.p__Euryarchaeota.c__Halobacteria.o__Haloferacales.f__Haloferacaceae.g__Halogeometricum
k__Archaea.p__Euryarchaeota.c__Halobacteria.o__Halobacteriales.f__Halobacteriaceae.g__Halapricum	k__Bacteria.p__Proteobacteria.c__Alphaproteobacteria.o__Rhodobacterales.f__Rhodobacteraceae.g__Tropicibacter
k__Bacteria.p__Actinobacteria.c__Actinobacteria.o__Micrococcales.f__Microbacteriaceae.g__Rhodoluna	k__Bacteria.p__Actinobacteria.c__Actinobacteria.o__Corynebacteriales.g__Tomitella
k__Bacteria.p__Actinobacteria.c__Actinobacteria.o__Micrococcales.f__Microbacteriaceae.g__Gryllotalpicola	k__Bacteria.p__Proteobacteria.c__Betaproteobacteria.o__Burkholderiales.f__Comamonadaceae.g__Variovorax
k__Bacteria.p__Proteobacteria.c__Alphaproteobacteria.o__Rhodospirillales.f__Rhodospirillaceae.g__Thalassobaculum	k__Bacteria.p__Proteobacteria.c__Gammaproteobacteria.o__Cellvibrionales.f__Cellvibrionaceae.g__Gilvimarinus
k__Bacteria.p__Proteobacteria.c__Deltaproteobacteria.o__Bdellovibrionales.f__Halobacteriovoraceae.g__Halobacteriovorax	k__Bacteria.p__Proteobacteria.c__Alphaproteobacteria.o__Rhodobacterales.f__Rhodobacteraceae.g__Nesiotobacter
k__Bacteria.p__Firmicutes.c__Negativicutes.o__Veillonellales.f__Veillonellaceae.g__Dialister	k__Bacteria.p__Proteobacteria.c__Gammaproteobacteria.o__Enterobacteriales.f__Enterobacteriaceae.g__Moellerella
k__Bacteria.p__Verrucomicrobia.o__Methylacidiphilales.f__Methylacidiphilaceae.g__Methylacidiphilum	k__Bacteria.p__Proteobacteria.c__Gammaproteobacteria.g__Gallaecimonas
k__Bacteria.p__Actinobacteria.c__Actinobacteria.o__Micrococcales.f__Dermatophilaceae.g__Kineosphaera	k__Bacteria.p__Cyanobacteria.o__Nostocales.f__Nostocaceae.g__Aphanizomenon
k__Bacteria.p__Actinobacteria.c__Actinobacteria.o__Streptosporangiales.f__Nocardiopsaceae.g__Allosalinactinospora	k__Bacteria.p__Bacteroidetes.c__Flavobacteriia.o__Flavobacteriales.f__Flavobacteriaceae.g__Flagellimonas
k__Bacteria.p__Firmicutes.c__Erysipelotrichia.o__Erysipelotrichales.f__Erysipelotrichaceae.g__Faecalicoccus	k__Bacteria.p__Proteobacteria.c__Gammaproteobacteria.o__Chromatiales.f__Chromatiaceae.g__Thiocapsa
k__Bacteria.p__Verrucomicrobia.c__Opitutae.o__Opitutales.f__Opitutaceae.g__Opitutus	k__Bacteria.p__Proteobacteria.c__Gammaproteobacteria.o__Enterobacteriales.f__Enterobacteriaceae.g__Cosenzaea
k__Bacteria.p__Planctomycetes.c__Planctomycetia.o__Planctomycetales.f__Planctomycetaceae.g__Gimesia	k__Bacteria.p__Cyanobacteria.o__Nostocales.f__Scytonemataceae.g__Scytonema
k__Bacteria.p__Firmicutes.c__Bacilli.o__Bacillales.f__Planococcaceae.g__Sporosarcina	k__Bacteria.p__Actinobacteria.c__Actinobacteria.o__Micrococcales.f__Micrococcaceae.g__Yaniella
k__Bacteria.p__Proteobacteria.c__Gammaproteobacteria.o__Chromatiales.f__Wenzhouxiangellaceae.g__Wenzhouxiangella	k__Bacteria.p__Proteobacteria.c__Gammaproteobacteria.o__Alteromonadales.f__Ferrimonadaceae.g__Ferrimonas
k__Bacteria.p__Actinobacteria.c__Actinobacteria.o__Corynebacteriales.g__Lawsonella	k__Bacteria.p__Firmicutes.c__Erysipelotrichia.o__Erysipelotrichales.f__Erysipelotrichaceae.g__Holdemania
k__Bacteria.p__Proteobacteria.c__Gammaproteobacteria.o__Oceanospirillales.f__Halomonadaceae.g__Candidatus_Portiera	k__Bacteria.p__Proteobacteria.c__Gammaproteobacteria.g__Sedimenticola
k__Bacteria.p__Firmicutes.c__Erysipelotrichia.o__Erysipelotrichales.f__Erysipelotrichaceae.g__Holdemanella	k__Bacteria.p__Proteobacteria.c__Gammaproteobacteria.o__Oceanospirillales.f__Halomonadaceae.g__Halotalea
k__Archaea.p__Euryarchaeota.c__Methanomicrobia.o__Methanomicrobiales.f__Methanomicrobiaceae.g__Methanomicrobium	k__Bacteria.p__Proteobacteria.c__Gammaproteobacteria.o__Enterobacteriales.f__Enterobacteriaceae.g__Klebsiella
k__Bacteria.p__Bacteroidetes.c__Bacteroidia.o__Bacteroidales.f__Porphyromonadaceae.g__Sanguibacteroides	k__Bacteria.p__Actinobacteria.c__Actinobacteria.g__Thermobispora
k__Bacteria.p__Proteobacteria.c__Alphaproteobacteria.o__Rhizobiales.f__Hyphomicrobiaceae.g__Hyphomicrobium	k__Bacteria.p__Proteobacteria.c__Gammaproteobacteria.o__Alteromonadales.f__Shewanellaceae.g__Shewanella
k__Bacteria.p__Proteobacteria.c__Alphaproteobacteria.o__Rhizobiales.f__Bradyrhizobiaceae.g__Tardiphaga	k__Bacteria.p__Proteobacteria.c__Gammaproteobacteria.o__Oceanospirillales.f__Alcanivoracaceae.g__Kangiella
k__Bacteria.p__Firmicutes.c__Negativicutes.o__Acidaminococcales.f__Acidaminococcaceae.g__Acidaminococcus	k__Bacteria.p__Proteobacteria.c__Alphaproteobacteria.o__Rhodobacterales.f__Rhodobacteraceae.g__Ponticoccus
k__Bacteria.p__Proteobacteria.c__Alphaproteobacteria.o__Sphingomonadales.f__Sphingomonadaceae.g__Sphingopyxis	k__Bacteria.p__Proteobacteria.c__Gammaproteobacteria.o__Aeromonadales.f__Succinivibrionaceae.g__Succinimonas
k__Bacteria.p__Actinobacteria.c__Actinobacteria.o__Micrococcales.f__Intrasporangiaceae.g__Terracoccus	k__Bacteria.p__Actinobacteria.c__Actinobacteria.o__Micrococcales.g__Timonella
k__Bacteria.p__Proteobacteria.c__Gammaproteobacteria.o__Xanthomonadales.f__Xanthomonadaceae.g__Arenimonas	k__Bacteria.p__Actinobacteria.c__Actinobacteria.o__Micromonosporales.f__Micromonosporaceae.g__Micromonospora
k__Bacteria.p__Proteobacteria.c__Alphaproteobacteria.o__Rhodobacterales.f__Rhodobacteraceae.g__Ponticoccus	k__Bacteria.p__Actinobacteria.c__Actinobacteria.o__Micrococcales.f__Microbacteriaceae.g__Cryobacterium
k__Bacteria.p__Actinobacteria.c__Actinobacteria.o__Propionibacteriales.f__Propionibacteriaceae.g__Microlunatus	k__Bacteria.p__Proteobacteria.c__Betaproteobacteria.o__Neisseriales.f__Chromobacteriaceae.g__Deefgea
k__Bacteria.p__Actinobacteria.c__Actinobacteria.o__Micrococcales.f__Intrasporangiaceae.g__Knoellia	k__Bacteria.p__Firmicutes.c__Clostridia.o__Clostridiales.f__Peptococcaceae.g__Desulfurispora
k__Bacteria.p__Actinobacteria.c__Actinobacteria.o__Pseudonocardiales.f__Pseudonocardiaceae.g__Sciscionella	k__Bacteria.p__Firmicutes.c__Clostridia.o__Clostridiales.g__Levyella
k__Bacteria.p__Proteobacteria.c__Deltaproteobacteria.o__Desulfobacterales.f__Desulfobulbaceae.g__Desulfotalea	k__Bacteria.p__Actinobacteria.c__Actinobacteria.o__Micromonosporales.f__Micromonosporaceae.g__Catelliglobosispora
k__Bacteria.p__Proteobacteria.c__Betaproteobacteria.o__Burkholderiales.f__Burkholderiaceae.g__Chitinimonas	k__Bacteria.p__Caldiserica.c__Caldisericia.o__Caldisericales.f__Caldisericaceae.g__Caldisericum
k__Bacteria.p__Firmicutes.c__Clostridia.o__Clostridiales.f__Lachnospiraceae.g__Tyzzerella	k__Bacteria.p__Proteobacteria.c__Deltaproteobacteria.o__Desulfobacterales.f__Desulfobacteraceae.g__Desulfobacula
k__Bacteria.p__Cyanobacteria.o__Nostocales.f__Scytonemataceae.g__Scytonema	k__Bacteria.p__Proteobacteria.c__Alphaproteobacteria.o__Rickettsiales.f__Anaplasmataceae.g__Neorickettsia
k__Bacteria.p__Proteobacteria.c__Gammaproteobacteria.o__Pseudomonadales.f__Moraxellaceae.g__Moraxella	k__Bacteria.p__Proteobacteria.c__Alphaproteobacteria.o__Rhodobacterales.f__Rhodobacteraceae.g__Aliiroseovarius
k__Bacteria.p__Proteobacteria.c__Alphaproteobacteria.o__Magnetococcales.f__Magnetococcaceae.g__Magnetococcus	k__Bacteria.p__Cyanobacteria.o__Nostocales.f__Rivulariaceae.g__Rivularia
k__Archaea.p__Euryarchaeota.c__Halobacteria.o__Haloferacales.f__Haloferacaceae.g__Halogranum	k__Bacteria.p__Proteobacteria.c__Gammaproteobacteria.o__Thiotrichales.f__Thiotrichaceae.g__Thioploca
k__Bacteria.p__Firmicutes.c__Clostridia.o__Thermoanaerobacterales.f__Thermoanaerobacteraceae.g__Tepidanaerobacter	k__Archaea.p__Euryarchaeota.c__Methanomicrobia.o__Methanosarcinales.f__Methanosaetaceae.g__Methanosaeta
k__Bacteria.p__Bacteroidetes.c__Cytophagia.o__Cytophagales.f__Flammeovirgaceae.g__Roseivirga	k__Bacteria.p__Proteobacteria.c__Gammaproteobacteria.o__Vibrionales.f__Vibrionaceae.g__Candidatus_Photodesmus
k__Bacteria.p__Proteobacteria.c__Alphaproteobacteria.o__Rhizobiales.f__Hyphomicrobiaceae.g__Rhodoplanes	k__Bacteria.p__Proteobacteria.c__Alphaproteobacteria.o__Rhizobiales.f__Rhizobiaceae.g__Candidatus_Liberibacter
k__Bacteria.p__Proteobacteria.c__Gammaproteobacteria.g__Thiolapillus	k__Bacteria.p__Proteobacteria.c__Betaproteobacteria.o__Burkholderiales.f__Oxalobacteraceae.g__Massilia
k__Bacteria.p__Actinobacteria.c__Actinobacteria.o__Micrococcales.f__Cellulomonadaceae.g__Paraoerskovia	k__Bacteria.p__Proteobacteria.c__Gammaproteobacteria.o__Enterobacteriales.f__Enterobacteriaceae.g__Pectobacterium
k__Bacteria.p__Cyanobacteria.o__Pleurocapsales.g__Xenococcus	k__Bacteria.p__Bacteroidetes.c__Flavobacteriia.o__Flavobacteriales.f__Flavobacteriaceae.g__Capnocytophaga
k__Bacteria.p__Chloroflexi.c__Caldilineae.o__Caldilineales.f__Caldilineaceae.g__Caldilinea	k__Bacteria.p__Proteobacteria.c__Gammaproteobacteria.o__Oceanospirillales.f__Halomonadaceae.g__Halomonas
k__Bacteria.p__Proteobacteria.c__Gammaproteobacteria.o__Xanthomonadales.f__Rhodanobacteraceae.g__Luteibacter	k__Bacteria.p__Proteobacteria.c__Deltaproteobacteria.o__Desulfobacterales.f__Desulfobacteraceae.g__Desulfatirhabdium
k__Bacteria.p__Proteobacteria.c__Betaproteobacteria.o__Neisseriales.f__Chromobacteriaceae.g__Andreprevotia	k__Bacteria.p__Actinobacteria.c__Actinobacteria.o__Micromonosporales.f__Micromonosporaceae.g__Pilimelia
k__Bacteria.p__Bacteroidetes.c__Cytophagia.o__Cytophagales.f__Flammeovirgaceae.g__Flexithrix	k__Bacteria.p__Proteobacteria.c__Betaproteobacteria.o__Burkholderiales.g__Paucibacter
k__Bacteria.p__Cyanobacteria.o__Oscillatoriales.g__Coleofasciculus	k__Bacteria.p__Actinobacteria.c__Actinobacteria.o__Frankiales.f__Frankiaceae.g__Frankia
k__Bacteria.p__Proteobacteria.c__Gammaproteobacteria.o__Thiotrichales.f__Thiotrichaceae.g__Thioploca	k__Bacteria.p__Actinobacteria.c__Actinobacteria.o__Propionibacteriales.f__Nocardioidaceae.g__Propionicicella
k__Bacteria.p__Firmicutes.c__Clostridia.o__Halanaerobiales.f__Halobacteroidaceae.g__Orenia	k__Bacteria.p__Bacteroidetes.c__Bacteroidia.o__Bacteroidales.f__Prevotellaceae.g__Paraprevotella
k__Bacteria.p__Actinobacteria.c__Actinobacteria.o__Pseudonocardiales.f__Pseudonocardiaceae.g__Actinokineospora	k__Bacteria.p__Proteobacteria.c__Betaproteobacteria.o__Burkholderiales.f__Oxalobacteraceae.g__Oxalobacter
k__Archaea.p__Euryarchaeota.c__Thermococci.o__Thermococcales.f__Thermococcaceae.g__Pyrococcus	k__Bacteria.p__Firmicutes.c__Bacilli.o__Bacillales.f__Planococcaceae.g__Planomicrobium
k__Bacteria.p__Actinobacteria.c__Actinobacteria.o__Streptosporangiales.f__Nocardiopsaceae.g__Thermobifida	k__Archaea.p__Euryarchaeota.c__Methanobacteria.o__Methanobacteriales.f__Methanobacteriaceae.g__Methanosphaera
k__Bacteria.p__Proteobacteria.c__Epsilonproteobacteria.o__Nautiliales.f__Nautiliaceae.g__Nautilia	k__Bacteria.p__Acidobacteria.c__Acidobacteriia.o__Acidobacteriales.f__Acidobacteriaceae.g__Candidatus_Koribacter
k__Archaea.p__Euryarchaeota.c__Methanomicrobia.o__Methanosarcinales.f__Methanosarcinaceae.g__Methanosalsum	k__Bacteria.p__Proteobacteria.c__Alphaproteobacteria.o__Rhizobiales.f__Xanthobacteraceae.g__Xanthobacter
k__Bacteria.p__Proteobacteria.c__Betaproteobacteria.o__Burkholderiales.f__Alcaligenaceae.g__Derxia	k__Bacteria.p__Proteobacteria.c__Alphaproteobacteria.o__Rhizobiales.f__Methylobacteriaceae.g__Microvirga
k__Archaea.p__Thaumarchaeota.g__Candidatus_Nitrosopelagicus	k__Bacteria.p__Proteobacteria.c__Alphaproteobacteria.o__Caulobacterales.f__Caulobacteraceae.g__Asticcacaulis
k__Bacteria.p__Bacteroidetes.c__Flavobacteriia.o__Flavobacteriales.f__Crocinitomicaceae.g__Fluviicola	k__Bacteria.p__Proteobacteria.c__Gammaproteobacteria.o__Xanthomonadales.f__Xanthomonadaceae.g__Thermomonas
k__Bacteria.p__Firmicutes.c__Clostridia.o__Clostridiales.g__Intestinimonas	k__Bacteria.p__Bacteroidetes.o__Bacteroidetes_Order_II._Incertae_sedis.f__Rhodothermaceae.g__Salisaeta
k__Bacteria.p__Firmicutes.c__Bacilli.o__Bacillales.f__Staphylococcaceae.g__Salinicoccus	k__Bacteria.p__Bacteroidetes.c__Bacteroidia.o__Bacteroidales.f__Porphyromonadaceae.g__Fermentimonas
k__Archaea.p__Euryarchaeota.c__Halobacteria.o__Halobacteriales.f__Halobacteriaceae.g__Halomicrobium	k__Bacteria.p__Proteobacteria.c__Gammaproteobacteria.o__Methylococcales.f__Methylococcaceae.g__Methylomonas
k__Bacteria.p__Proteobacteria.c__Deltaproteobacteria.o__Syntrophobacterales.f__Syntrophaceae.g__Syntrophus	k__Bacteria.p__Proteobacteria.c__Gammaproteobacteria.o__Oceanospirillales.f__Oceanospirillaceae.g__Oceanospirillum
k__Bacteria.p__Firmicutes.c__Negativicutes.o__Selenomonadales.f__Sporomusaceae.g__Sporomusa	k__Bacteria.p__Bacteroidetes.c__Bacteroidia.o__Bacteroidales.f__Marinilabiliaceae.g__Geofilum
k__Bacteria.p__Actinobacteria.c__Actinobacteria.o__Micrococcales.f__Dermatophilaceae.g__Mobilicoccus	k__Bacteria.p__Proteobacteria.c__Gammaproteobacteria.o__Alteromonadales.f__Pseudoalteromonadaceae.g__Pseudoalteromonas
k__Bacteria.p__Proteobacteria.c__Alphaproteobacteria.o__Rhodospirillales.f__Rhodospirillaceae.g__Rhodovibrio	k__Bacteria.p__Firmicutes.c__Bacilli.o__Bacillales.f__Bacillaceae.g__Thalassobacillus
k__Bacteria.p__Proteobacteria.c__Gammaproteobacteria.o__Enterobacteriales.f__Enterobacteriaceae.g__Obesumbacterium	k__Bacteria.p__Actinobacteria.c__Actinobacteria.o__Micrococcales.f__Beutenbergiaceae.g__Beutenbergia
k__Bacteria.p__Aquificae.c__Aquificae.o__Desulfurobacteriales.f__Desulfurobacteriaceae.g__Thermovibrio	k__Bacteria.p__Actinobacteria.c__Actinobacteria.o__Micrococcales.f__Intrasporangiaceae.g__Ornithinimicrobium
k__Bacteria.p__Bacteroidetes.c__Flavobacteriia.o__Flavobacteriales.f__Flavobacteriaceae.g__Mesoflavibacter	k__Bacteria.p__Proteobacteria.c__Alphaproteobacteria.o__Rhizobiales.f__Phyllobacteriaceae.g__Nitratireductor
k__Bacteria.p__Bacteroidetes.c__Sphingobacteriia.o__Sphingobacteriales.f__Sphingobacteriaceae.g__Pedobacter	k__Bacteria.p__Proteobacteria.c__Gammaproteobacteria.o__Thiotrichales.f__Piscirickettsiaceae.g__Thioalkalimicrobium
k__Bacteria.p__Proteobacteria.c__Deltaproteobacteria.o__Myxococcales.f__Polyangiaceae.g__Chondromyces	k__Bacteria.p__Proteobacteria.c__Alphaproteobacteria.o__Sphingomonadales.f__Erythrobacteraceae.g__Croceicoccus
k__Bacteria.p__Firmicutes.c__Clostridia.o__Clostridiales.g__Levyella	k__Archaea.p__Euryarchaeota.c__Methanococci.o__Methanococcales.f__Methanocaldococcaceae.g__Methanotorris
k__Bacteria.p__Actinobacteria.c__Actinobacteria.o__Propionibacteriales.f__Propionibacteriaceae.g__Propionibacterium	k__Bacteria.p__Cyanobacteria.c__Gloeobacteria.o__Gloeobacterales.g__Gloeobacter
k__Bacteria.p__Proteobacteria.c__Gammaproteobacteria.o__Chromatiales.f__Ectothiorhodospiraceae.g__Alkalilimnicola	k__Bacteria.p__Proteobacteria.c__Deltaproteobacteria.o__Myxococcales.f__Vulgatibacteraceae.g__Vulgatibacter
k__Bacteria.p__Firmicutes.c__Erysipelotrichia.o__Erysipelotrichales.f__Erysipelotrichaceae.g__Kandleria	k__Bacteria.p__Proteobacteria.c__Betaproteobacteria.o__Burkholderiales.f__Burkholderiaceae.g__Limnobacter
k__Bacteria.p__Bacteroidetes.c__Cytophagia.o__Cytophagales.f__Cytophagaceae.g__Spirosoma	k__Bacteria.p__Firmicutes.c__Clostridia.o__Clostridiales.g__Pseudoflavonifractor
k__Bacteria.p__Proteobacteria.c__Gammaproteobacteria.o__Enterobacteriales.f__Enterobacteriaceae.g__Shigella	k__Bacteria.p__Acidobacteria.g__Thermoanaerobaculum
k__Bacteria.p__Deferribacteres.c__Deferribacteres.o__Deferribacterales.f__Deferribacteraceae.g__Denitrovibrio	k__Bacteria.p__Firmicutes.c__Erysipelotrichia.o__Erysipelotrichales.f__Erysipelotrichaceae.g__Eggerthia
k__Bacteria.p__Proteobacteria.c__Gammaproteobacteria.o__Chromatiales.f__Ectothiorhodospiraceae.g__Spiribacter	k__Bacteria.p__Proteobacteria.c__Alphaproteobacteria.o__Rhizobiales.f__Aurantimonadaceae.g__Aurantimonas
k__Bacteria.p__Bacteroidetes.c__Chitinophagia.o__Chitinophagales.f__Saprospiraceae.g__Aureispira	k__Archaea.p__Crenarchaeota.c__Thermoprotei.o__Desulfurococcales.f__Pyrodictiaceae.g__Hyperthermus
k__Bacteria.p__Proteobacteria.c__Gammaproteobacteria.o__Xanthomonadales.f__Rhodanobacteraceae.g__Dyella	k__Bacteria.p__Proteobacteria.c__Alphaproteobacteria.o__Rhizobiales.f__Hyphomicrobiaceae.g__Devosia
k__Bacteria.p__Proteobacteria.c__Alphaproteobacteria.o__Rhodobacterales.f__Rhodobacteraceae.g__Roseovarius	k__Bacteria.p__Firmicutes.c__Bacilli.o__Bacillales.f__Thermoactinomycetaceae.g__Thermoactinomyces
k__Bacteria.p__Proteobacteria.c__Gammaproteobacteria.o__Aeromonadales.f__Succinivibrionaceae.g__Succinivibrio	k__Bacteria.p__Proteobacteria.c__Deltaproteobacteria.o__Myxococcales.f__Kofleriaceae.g__Haliangium
k__Bacteria.p__Proteobacteria.c__Gammaproteobacteria.o__Oceanospirillales.f__Oceanospirillaceae.g__Oleispira	k__Bacteria.p__Proteobacteria.c__Alphaproteobacteria.o__Sphingomonadales.f__Sphingomonadaceae.g__Sandarakinorhabdus
k__Bacteria.p__Proteobacteria.c__Alphaproteobacteria.o__Rhodobacterales.f__Rhodobacteraceae.g__Aliiroseovarius	k__Bacteria.p__Firmicutes.c__Bacilli.o__Bacillales.f__Planococcaceae.g__Kurthia
k__Bacteria.p__Bacteroidetes.c__Chitinophagia.o__Chitinophagales.f__Chitinophagaceae.g__Flavihumibacter	k__Bacteria.p__Actinobacteria.c__Actinobacteria.o__Kineosporiales.f__Kineosporiaceae.g__Angustibacter
k__Bacteria.p__Bacteroidetes.c__Flavobacteriia.o__Flavobacteriales.f__Flavobacteriaceae.g__Polaribacter	k__Bacteria.p__Proteobacteria.c__Gammaproteobacteria.o__Chromatiales.f__Wenzhouxiangellaceae.g__Wenzhouxiangella
k__Bacteria.p__Proteobacteria.c__Deltaproteobacteria.o__Desulfovibrionales.f__Desulfovibrionaceae.g__Bilophila	k__Bacteria.p__Proteobacteria.c__Gammaproteobacteria.o__Chromatiales.f__Chromatiaceae.g__Nitrosococcus
k__Bacteria.p__Proteobacteria.c__Alphaproteobacteria.o__Rhizobiales.f__Hyphomicrobiaceae.g__Rhodomicrobium	k__Bacteria.p__Rhodothermaeota.c__Balneolia.o__Balneolales.f__Balneolaceae.g__Gracilimonas
k__Bacteria.p__Bacteroidetes.c__Flavobacteriia.o__Flavobacteriales.f__Flavobacteriaceae.g__Winogradskyella	k__Bacteria.p__Firmicutes.c__Clostridia.o__Thermoanaerobacterales.f__Thermoanaerobacterales_Family_III._Incertae_Sedis.g__Thermoanaerobacterium
k__Bacteria.p__Proteobacteria.c__Alphaproteobacteria.o__Rhodobacterales.f__Hyphomonadaceae.g__Euryhalocaulis	k__Bacteria.p__Firmicutes.c__Bacilli.o__Bacillales.f__Bacillaceae.g__Salimicrobium
k__Bacteria.p__Actinobacteria.c__Actinobacteria.o__Actinomycetales.f__Actinomycetaceae.g__Trueperella	k__Bacteria.p__Proteobacteria.c__Gammaproteobacteria.g__Candidatus_Ruthia
k__Bacteria.p__Actinobacteria.c__Actinobacteria.o__Micrococcales.f__Dermacoccaceae.g__Dermacoccus	k__Bacteria.p__Firmicutes.c__Bacilli.o__Bacillales.f__Sporolactobacillaceae.g__Sporolactobacillus
k__Bacteria.p__Spirochaetes.c__Spirochaetia.o__Spirochaetales.f__Spirochaetaceae.g__Treponema	k__Bacteria.p__Proteobacteria.c__Deltaproteobacteria.o__Desulfobacterales.f__Desulfobacteraceae.g__Desulfatitalea
k__Bacteria.p__Actinobacteria.c__Actinobacteria.o__Pseudonocardiales.f__Pseudonocardiaceae.g__Pseudonocardia	k__Bacteria.p__Proteobacteria.c__Betaproteobacteria.o__Burkholderiales.f__Burkholderiaceae.g__Chitinimonas
k__Bacteria.p__Bacteroidetes.c__Flavobacteriia.o__Flavobacteriales.f__Flavobacteriaceae.g__Vitellibacter	k__Bacteria.p__Proteobacteria.c__Betaproteobacteria.o__Burkholderiales.g__Rhizobacter
k__Bacteria.p__Actinobacteria.c__Actinobacteria.o__Corynebacteriales.f__Nocardiaceae.g__Smaragdicoccus	k__Bacteria.p__Proteobacteria.c__Gammaproteobacteria.o__Enterobacteriales.f__Enterobacteriaceae.g__Pragia
k__Bacteria.p__Actinobacteria.c__Actinobacteria.o__Corynebacteriales.f__Williamsiaceae.g__Williamsia	k__Bacteria.p__Proteobacteria.c__Gammaproteobacteria.o__Enterobacteriales.f__Enterobacteriaceae.g__Xenorhabdus
k__Bacteria.p__Proteobacteria.c__Alphaproteobacteria.o__Rhodobacterales.f__Rhodobacteraceae.g__Actibacterium	k__Bacteria.p__Cyanobacteria.o__Nostocales.f__Nostocaceae.g__Richelia
k__Bacteria.p__Spirochaetes.c__Spirochaetia.o__Brachyspirales.f__Brachyspiraceae.g__Brachyspira	k__Bacteria.p__Proteobacteria.c__Gammaproteobacteria.o__Enterobacteriales.f__Enterobacteriaceae.g__Salmonella
k__Bacteria.p__Firmicutes.c__Clostridia.o__Clostridiales.f__Ruminococcaceae.g__Ruminiclostridium	k__Bacteria.p__Proteobacteria.c__Alphaproteobacteria.o__Rhizobiales.f__Xanthobacteraceae.g__Pseudolabrys
k__Bacteria.p__Proteobacteria.c__Betaproteobacteria.o__Burkholderiales.f__Comamonadaceae.g__Simplicispira	k__Bacteria.p__Nitrospirae.c__Nitrospira.o__Nitrospirales.f__Nitrospiraceae.g__Thermodesulfovibrio
k__Bacteria.p__Proteobacteria.c__Alphaproteobacteria.o__Rhodobacterales.f__Rhodobacteraceae.g__Nesiotobacter	k__Bacteria.p__Proteobacteria.c__Betaproteobacteria.o__Rhodocyclales.f__Rhodocyclaceae.g__Uliginosibacterium
k__Bacteria.p__Bacteroidetes.c__Flavobacteriia.o__Flavobacteriales.f__Flavobacteriaceae.g__Xanthomarina	k__Bacteria.p__Cyanobacteria.o__Pleurocapsales.g__Stanieria
k__Bacteria.p__Actinobacteria.c__Actinobacteria.o__Micrococcales.f__Sanguibacteraceae.g__Sanguibacter	k__Bacteria.p__Proteobacteria.c__Gammaproteobacteria.o__Enterobacteriales.f__Enterobacteriaceae.g__Yokenella
k__Archaea.p__Euryarchaeota.c__Halobacteria.o__Halobacteriales.f__Halobacteriaceae.g__Halobacterium	k__Bacteria.p__Bacteroidetes.c__Flavobacteriia.o__Flavobacteriales.f__Flavobacteriaceae.g__Mangrovimonas
k__Bacteria.p__Proteobacteria.c__Deltaproteobacteria.o__Syntrophobacterales.f__Syntrophaceae.g__Desulfomonile	k__Bacteria.p__Thermodesulfobacteria.c__Thermodesulfobacteria.o__Thermodesulfobacteriales.f__Thermodesulfobacteriaceae.g__Thermodesulfobacterium
k__Bacteria.p__Proteobacteria.c__Gammaproteobacteria.o__Pseudomonadales.f__Moraxellaceae.g__Enhydrobacter	k__Bacteria.p__Firmicutes.c__Clostridia.o__Clostridiales.f__Clostridiaceae.g__Clostridium
k__Bacteria.p__Firmicutes.c__Erysipelotrichia.o__Erysipelotrichales.f__Erysipelotrichaceae.g__Eggerthia	k__Bacteria.p__Proteobacteria.c__Betaproteobacteria.o__Burkholderiales.g__Roseateles
k__Bacteria.p__Cyanobacteria.o__Nostocales.f__Nostocaceae.g__Cylindrospermopsis	k__Bacteria.p__Firmicutes.c__Clostridia.o__Clostridiales.f__Ruminococcaceae.g__Faecalibacterium
k__Bacteria.p__Actinobacteria.c__Actinobacteria.o__Propionibacteriales.f__Propionibacteriaceae.g__Tessaracoccus	k__Bacteria.p__Firmicutes.c__Clostridia.o__Clostridiales.f__Peptococcaceae.g__Desulfitobacterium
k__Bacteria.p__Proteobacteria.c__Alphaproteobacteria.o__Rhodobacterales.f__Rhodobacteraceae.g__Sagittula	k__Bacteria.p__Proteobacteria.c__Gammaproteobacteria.o__Chromatiales.f__Ectothiorhodospiraceae.g__Arhodomonas
k__Bacteria.p__Bacteroidetes.c__Flavobacteriia.o__Flavobacteriales.f__Flavobacteriaceae.g__Kordia	k__Bacteria.p__Firmicutes.c__Bacilli.o__Lactobacillales.f__Aerococcaceae.g__Aerococcus
k__Bacteria.p__Proteobacteria.c__Gammaproteobacteria.o__Enterobacteriales.f__Enterobacteriaceae.g__Brenneria	k__Bacteria.p__Proteobacteria.c__Alphaproteobacteria.o__Rhodobacterales.f__Rhodobacteraceae.g__Roseobacter
k__Bacteria.p__Proteobacteria.c__Alphaproteobacteria.o__Rhizobiales.f__Aurantimonadaceae.g__Aurantimonas	k__Bacteria.p__Proteobacteria.c__Gammaproteobacteria.o__Orbales.f__Orbaceae.g__Frischella
k__Bacteria.p__Verrucomicrobia.c__Verrucomicrobiae.o__Verrucomicrobiales.f__Verrucomicrobiaceae.g__Haloferula	k__Bacteria.p__Proteobacteria.c__Gammaproteobacteria.o__Aeromonadales.f__Succinivibrionaceae.g__Succinivibrio
k__Bacteria.p__Aquificae.c__Aquificae.o__Aquificales.g__Thermosulfidibacter	k__Bacteria.p__Cyanobacteria.o__Nostocales.f__Nostocaceae.g__Nodularia
k__Bacteria.p__Cyanobacteria.o__Stigonematales.g__Mastigocladopsis	k__Bacteria.p__Bacteroidetes.c__Sphingobacteriia.o__Sphingobacteriales.f__Sphingobacteriaceae.g__Mucilaginibacter
k__Bacteria.p__Proteobacteria.c__Deltaproteobacteria.o__Desulfobacterales.f__Desulfobacteraceae.g__Desulforegula	k__Bacteria.p__Bacteroidetes.c__Cytophagia.o__Cytophagales.f__Cytophagaceae.g__Rudanella
k__Bacteria.p__Proteobacteria.c__Gammaproteobacteria.o__Pasteurellales.f__Pasteurellaceae.g__Chelonobacter	k__Bacteria.p__Bacteroidetes.c__Flavobacteriia.o__Flavobacteriales.f__Flavobacteriaceae.g__Vitellibacter
k__Bacteria.p__Actinobacteria.c__Actinobacteria.o__Propionibacteriales.f__Nocardioidaceae.g__Kribbella	k__Bacteria.p__Proteobacteria.c__Gammaproteobacteria.o__Oceanospirillales.f__Oceanospirillaceae.g__Nitrincola
k__Bacteria.p__Proteobacteria.c__Alphaproteobacteria.o__Rhizobiales.f__Hyphomicrobiaceae.g__Devosia	k__Bacteria.p__Bacteroidetes.c__Cytophagia.o__Cytophagales.f__Cytophagaceae.g__Anditalea
k__Bacteria.p__Bacteroidetes.c__Flavobacteriia.o__Flavobacteriales.f__Flavobacteriaceae.g__Lutibacter	k__Bacteria.p__Proteobacteria.c__Gammaproteobacteria.o__Pseudomonadales.f__Moraxellaceae.g__Psychrobacter
k__Bacteria.p__Cyanobacteria.o__Nostocales.f__Nostocaceae.g__Richelia	k__Bacteria.p__Proteobacteria.c__Gammaproteobacteria.o__Oceanospirillales.f__Halomonadaceae.g__Carnimonas
k__Bacteria.p__Thermodesulfobacteria.c__Thermodesulfobacteria.o__Thermodesulfobacteriales.f__Thermodesulfobacteriaceae.g__Thermodesulfatator	k__Archaea.p__Thaumarchaeota.c__Nitrososphaeria.o__Nitrososphaerales.f__Nitrososphaeraceae.g__Nitrososphaera
k__Bacteria.p__Thermotogae.c__Thermotogae.o__Thermotogales.f__Thermotogaceae.g__Thermotoga	k__Bacteria.p__Actinobacteria.c__Actinobacteria.o__Micrococcales.f__Intrasporangiaceae.g__Intrasporangium
k__Bacteria.p__Actinobacteria.c__Actinobacteria.o__Micromonosporales.f__Micromonosporaceae.g__Pilimelia	k__Bacteria.p__Proteobacteria.c__Alphaproteobacteria.o__Rhodobacterales.f__Hyphomonadaceae.g__Oceanicaulis
k__Bacteria.p__Proteobacteria.c__Betaproteobacteria.o__Burkholderiales.f__Comamonadaceae.g__Diaphorobacter	k__Bacteria.p__Proteobacteria.c__Betaproteobacteria.o__Sulfuricellales.f__Sulfuricellaceae.g__Sulfuricella
k__Bacteria.p__Proteobacteria.c__Alphaproteobacteria.o__Rhodobacterales.f__Rhodobacteraceae.g__Confluentimicrobium	k__Bacteria.p__Proteobacteria.c__Betaproteobacteria.o__Methylophilales.f__Methylophilaceae.g__Methylotenera
k__Archaea.p__Thaumarchaeota.o__Nitrosopumilales.f__Nitrosopumilaceae.g__Candidatus_Nitrosoarchaeum	k__Bacteria.p__Firmicutes.c__Bacilli.o__Lactobacillales.f__Aerococcaceae.g__Eremococcus
k__Bacteria.p__Proteobacteria.c__Betaproteobacteria.o__Burkholderiales.f__Comamonadaceae.g__Brachymonas	k__Bacteria.p__Bacteroidetes.c__Flavobacteriia.o__Flavobacteriales.f__Flavobacteriaceae.g__Psychroserpens
k__Bacteria.p__Proteobacteria.c__Alphaproteobacteria.o__Sphingomonadales.f__Erythrobacteraceae.g__Altererythrobacter	k__Bacteria.p__Chlorobi.c__Chlorobia.o__Chlorobiales.f__Chlorobiaceae.g__Chlorobium
k__Bacteria.p__Bacteroidetes.c__Bacteroidia.o__Bacteroidales.f__Marinilabiliaceae.g__Saccharicrinis	k__Bacteria.p__Proteobacteria.c__Alphaproteobacteria.o__Rhodobacterales.f__Rhodobacteraceae.g__Roseibium
k__Bacteria.p__Actinobacteria.c__Actinobacteria.o__Pseudonocardiales.f__Pseudonocardiaceae.g__Actinoalloteichus	k__Bacteria.p__Proteobacteria.c__Betaproteobacteria.o__Rhodocyclales.f__Rhodocyclaceae.g__Azospira
k__Bacteria.p__Actinobacteria.c__Thermoleophilia.o__Solirubrobacterales.f__Patulibacteraceae.g__Patulibacter	k__Bacteria.p__Proteobacteria.c__Gammaproteobacteria.f__Competibacteraceae.g__Candidatus_Contendobacter
k__Bacteria.p__Synergistetes.c__Synergistia.o__Synergistales.f__Synergistaceae.g__Aminomonas	k__Bacteria.p__Proteobacteria.c__Gammaproteobacteria.o__Pasteurellales.f__Pasteurellaceae.g__Gallibacterium
k__Bacteria.p__Actinobacteria.c__Actinobacteria.o__Actinomycetales.f__Actinomycetaceae.g__Actinobaculum	k__Bacteria.p__Proteobacteria.c__Alphaproteobacteria.o__Rhodobacterales.f__Rhodobacteraceae.g__Thalassobium
k__Bacteria.p__Actinobacteria.c__Actinobacteria.o__Micrococcales.f__Microbacteriaceae.g__Curtobacterium	k__Bacteria.p__Firmicutes.c__Clostridia.o__Thermoanaerobacterales.f__Thermoanaerobacteraceae.g__Thermoanaerobacter
k__Bacteria.p__Firmicutes.c__Clostridia.o__Clostridiales.f__Clostridiales_Family_XIII._Incertae_Sedis.g__Mogibacterium	k__Bacteria.p__Firmicutes.c__Clostridia.o__Thermoanaerobacterales.f__Thermodesulfobiaceae.g__Coprothermobacter
k__Bacteria.p__Proteobacteria.c__Alphaproteobacteria.o__Rhodospirillales.f__Acetobacteraceae.g__Saccharibacter	k__Bacteria.p__Proteobacteria.c__Betaproteobacteria.g__Candidatus_Accumulibacter
k__Bacteria.p__Proteobacteria.c__Betaproteobacteria.o__Burkholderiales.f__Comamonadaceae.g__Lampropedia	k__Bacteria.p__Bacteroidetes.c__Flavobacteriia.o__Flavobacteriales.f__Flavobacteriaceae.g__Zobellia
k__Bacteria.p__Thermotogae.c__Thermotogae.o__Mesoaciditogales.f__Mesoaciditogaceae.g__Mesoaciditoga	k__Archaea.p__Euryarchaeota.c__Methanomicrobia.o__Methanomicrobiales.f__Methanomicrobiaceae.g__Methanoplanus
k__Bacteria.p__Proteobacteria.c__Alphaproteobacteria.o__Rhodobacterales.f__Rhodobacteraceae.g__Phaeobacter	k__Bacteria.p__Proteobacteria.c__Alphaproteobacteria.o__Rhizobiales.f__Hyphomicrobiaceae.g__Filomicrobium
k__Bacteria.p__Acidobacteria.c__Acidobacteriia.o__Acidobacteriales.f__Acidobacteriaceae.g__Silvibacterium	k__Bacteria.p__Firmicutes.c__Clostridia.o__Clostridiales.f__Ruminococcaceae.g__Ruminiclostridium
k__Bacteria.p__Thermotogae.c__Thermotogae.o__Thermotogales.f__Fervidobacteriaceae.g__Fervidobacterium	k__Bacteria.p__Bacteroidetes.c__Chitinophagia.o__Chitinophagales.f__Saprospiraceae.g__Aureispira
k__Bacteria.p__Proteobacteria.c__Alphaproteobacteria.o__Rhizobiales.f__Xanthobacteraceae.g__Starkeya	k__Bacteria.p__Proteobacteria.c__Alphaproteobacteria.o__Rhizobiales.f__Phyllobacteriaceae.g__Phyllobacterium
k__Bacteria.p__Bacteroidetes.c__Chitinophagia.o__Chitinophagales.f__Chitinophagaceae.g__Terrimonas	k__Bacteria.p__Chlamydiae.c__Chlamydiia.o__Chlamydiales.f__Criblamydiaceae.g__Criblamydia
k__Bacteria.p__Firmicutes.c__Bacilli.o__Bacillales.f__Alicyclobacillaceae.g__Kyrpidia	k__Bacteria.p__Actinobacteria.c__Actinobacteria.o__Kineosporiales.f__Kineosporiaceae.g__Kineosporia
k__Bacteria.p__Firmicutes.c__Bacilli.o__Bacillales.f__Sporolactobacillaceae.g__Tuberibacillus	k__Bacteria.p__Actinobacteria.c__Actinobacteria.o__Micromonosporales.f__Micromonosporaceae.g__Hamadaea
k__Bacteria.p__Proteobacteria.c__Alphaproteobacteria.o__Kordiimonadales.f__Kordiimonadaceae.g__Kordiimonas	k__Bacteria.p__Proteobacteria.c__Alphaproteobacteria.o__Rhizobiales.f__Beijerinckiaceae.g__Chelatococcus
k__Bacteria.p__Firmicutes.c__Negativicutes.o__Selenomonadales.f__Sporomusaceae.g__Acetonema	k__Bacteria.p__Cyanobacteria.o__Oscillatoriales.g__Moorea
k__Bacteria.p__Proteobacteria.c__Deltaproteobacteria.o__Bdellovibrionales.f__Bdellovibrionaceae.g__Bdellovibrio	k__Bacteria.p__Proteobacteria.c__Alphaproteobacteria.o__Rhodobacterales.f__Hyphomonadaceae.g__Henriciella
k__Bacteria.p__Proteobacteria.c__Betaproteobacteria.o__Burkholderiales.f__Comamonadaceae.g__Hydrogenophaga	k__Bacteria.p__Proteobacteria.c__Gammaproteobacteria.o__Oceanospirillales.f__Oceanospirillaceae.g__Bermanella
k__Bacteria.p__Bacteroidetes.c__Cytophagia.o__Cytophagales.f__Cytophagaceae.g__Sporocytophaga	k__Bacteria.p__Actinobacteria.c__Actinobacteria.o__Corynebacteriales.f__Corynebacteriaceae.g__Corynebacterium
k__Bacteria.p__Proteobacteria.c__Deltaproteobacteria.o__Syntrophobacterales.f__Syntrophaceae.g__Desulfobacca	k__Bacteria.p__Firmicutes.c__Bacilli.o__Bacillales.f__Bacillaceae.g__Domibacillus
k__Bacteria.p__Bacteroidetes.c__Bacteroidia.o__Bacteroidales.f__Prolixibacteraceae.g__Prolixibacter	k__Bacteria.p__Proteobacteria.c__Alphaproteobacteria.o__Rhizobiales.f__Bradyrhizobiaceae.g__Tardiphaga
k__Bacteria.p__Bacteroidetes.c__Bacteroidia.o__Bacteroidales.f__Marinilabiliaceae.g__Marinilabilia	k__Bacteria.p__Proteobacteria.c__Alphaproteobacteria.o__Caulobacterales.f__Caulobacteraceae.g__Brevundimonas
k__Bacteria.p__Proteobacteria.c__Betaproteobacteria.o__Burkholderiales.f__Comamonadaceae.g__Ramlibacter	k__Bacteria.p__Actinobacteria.c__Actinobacteria.o__Corynebacteriales.f__Nocardiaceae.g__Rhodococcus
k__Bacteria.p__Proteobacteria.c__Epsilonproteobacteria.o__Campylobacterales.f__Helicobacteraceae.g__Wolinella	k__Bacteria.p__Actinobacteria.c__Actinobacteria.o__Propionibacteriales.f__Propionibacteriaceae.g__Tessaracoccus
k__Bacteria.p__Proteobacteria.c__Alphaproteobacteria.o__Rhodobacterales.f__Rhodobacteraceae.g__Labrenzia	k__Bacteria.p__Verrucomicrobia.c__Opitutae.o__Puniceicoccales.f__Puniceicoccaceae.g__Coraliomargarita
k__Bacteria.p__Proteobacteria.c__Alphaproteobacteria.o__Rhodospirillales.f__Acetobacteraceae.g__Komagataeibacter	k__Bacteria.p__Proteobacteria.c__Gammaproteobacteria.o__Xanthomonadales.f__Xanthomonadaceae.g__Xylella
k__Bacteria.p__Proteobacteria.c__Gammaproteobacteria.o__Methylococcales.f__Methylococcaceae.g__Methylosarcina	k__Bacteria.p__Proteobacteria.c__Betaproteobacteria.o__Burkholderiales.f__Alcaligenaceae.g__Azohydromonas
k__Bacteria.p__Bacteroidetes.c__Flavobacteriia.o__Flavobacteriales.f__Flavobacteriaceae.g__Croceitalea	k__Archaea.p__Euryarchaeota.c__Methanomicrobia.o__Methanomicrobiales.f__Methanospirillaceae.g__Methanospirillum
k__Bacteria.p__Proteobacteria.c__Alphaproteobacteria.o__Rhizobiales.f__Rhizobiaceae.g__Candidatus_Liberibacter	k__Bacteria.p__Proteobacteria.c__Gammaproteobacteria.o__Enterobacteriales.f__Enterobacteriaceae.g__Ewingella
k__Bacteria.p__Actinobacteria.c__Actinobacteria.o__Micrococcales.f__Microbacteriaceae.g__Pseudoclavibacter	k__Bacteria.p__Proteobacteria.c__Gammaproteobacteria.o__Enterobacteriales.f__Enterobacteriaceae.g__Pluralibacter
k__Bacteria.p__Proteobacteria.c__Betaproteobacteria.o__Burkholderiales.g__Aquincola	k__Bacteria.p__Actinobacteria.c__Coriobacteriia.o__Eggerthellales.f__Eggerthellaceae.g__Eggerthella
k__Bacteria.p__Actinobacteria.c__Actinobacteria.o__Micrococcales.g__Timonella	k__Bacteria.p__Proteobacteria.c__Alphaproteobacteria.o__Rhodospirillales.f__Rhodospirillaceae.g__Skermanella
k__Archaea.p__Crenarchaeota.c__Thermoprotei.o__Thermoproteales.f__Thermoproteaceae.g__Thermoproteus	k__Bacteria.p__Bacteroidetes.c__Flavobacteriia.o__Flavobacteriales.f__Flavobacteriaceae.g__Bizionia
k__Bacteria.p__Proteobacteria.c__Alphaproteobacteria.o__Rickettsiales.f__Candidatus_Midichloriaceae.g__Candidatus_Midichloria	k__Bacteria.p__Proteobacteria.c__Gammaproteobacteria.o__Oceanospirillales.f__Halomonadaceae.g__Candidatus_Portiera
k__Bacteria.p__Firmicutes.c__Bacilli.o__Bacillales.f__Bacillaceae.g__Geobacillus	k__Bacteria.p__Proteobacteria.c__Alphaproteobacteria.o__Rhizobiales.f__Rhodobiaceae.g__Afifella
k__Bacteria.p__Firmicutes.c__Clostridia.o__Clostridiales.f__Peptostreptococcaceae.g__Peptostreptococcus	k__Bacteria.p__Proteobacteria.c__Gammaproteobacteria.o__Enterobacteriales.f__Enterobacteriaceae.g__Shimwellia
k__Bacteria.p__Proteobacteria.c__Betaproteobacteria.o__Burkholderiales.f__Comamonadaceae.g__Curvibacter	k__Bacteria.p__Deinococcus.Thermus.c__Deinococci.o__Deinococcales.f__Deinococcaceae.g__Deinococcus
k__Bacteria.p__Proteobacteria.c__Epsilonproteobacteria.g__Nitratiruptor	k__Bacteria.o__Haloplasmatales.f__Haloplasmataceae.g__Haloplasma
k__Bacteria.p__Firmicutes.c__Bacilli.o__Lactobacillales.f__Aerococcaceae.g__Aerococcus	k__Bacteria.p__Firmicutes.c__Bacilli.o__Bacillales.f__Bacillaceae.g__Marinococcus
k__Bacteria.p__Planctomycetes.c__Planctomycetia.o__Planctomycetales.f__Planctomycetaceae.g__Rhodopirellula	k__Bacteria.p__Proteobacteria.c__Gammaproteobacteria.o__Cellvibrionales.f__Spongiibacteraceae.g__Spongiibacter
k__Bacteria.p__Proteobacteria.c__Deltaproteobacteria.o__Desulfobacterales.f__Desulfobacteraceae.g__Desulfatirhabdium	k__Bacteria.p__Proteobacteria.c__Alphaproteobacteria.o__Rhodospirillales.f__Rhodospirillaceae.g__Candidatus_Endolissoclinum
k__Bacteria.p__Proteobacteria.c__Betaproteobacteria.o__Burkholderiales.f__Alcaligenaceae.g__Castellaniella	k__Bacteria.p__Thermotogae.c__Thermotogae.o__Petrotogales.g__Marinitoga
k__Bacteria.p__Chrysiogenetes.c__Chrysiogenetes.o__Chrysiogenales.f__Chrysiogenaceae.g__Chrysiogenes	k__Bacteria.p__Proteobacteria.c__Alphaproteobacteria.o__Rhodospirillales.f__Rhodospirillaceae.g__Fodinicurvata
k__Bacteria.p__Proteobacteria.c__Alphaproteobacteria.o__Rhodospirillales.f__Rhodospirillaceae.g__Azospirillum	k__Bacteria.p__Proteobacteria.c__Betaproteobacteria.o__Burkholderiales.f__Alcaligenaceae.g__Basilea
k__Bacteria.p__Proteobacteria.c__Alphaproteobacteria.o__Caulobacterales.f__Caulobacteraceae.g__Phenylobacterium	k__Bacteria.p__Proteobacteria.c__Alphaproteobacteria.o__Rhodobacterales.f__Rhodobacteraceae.g__Roseovarius
k__Bacteria.p__Firmicutes.c__Bacilli.o__Bacillales.f__Bacillaceae.g__Aeribacillus	k__Bacteria.p__Actinobacteria.c__Actinobacteria.o__Micrococcales.f__Intrasporangiaceae.g__Knoellia
k__Bacteria.p__Actinobacteria.c__Acidimicrobiia.o__Acidimicrobiales.f__Microthrixaceae.g__Candidatus_Microthrix	k__Bacteria.p__Bacteroidetes.c__Flavobacteriia.o__Flavobacteriales.f__Flavobacteriaceae.g__Croceibacter
k__Bacteria.p__Thermotogae.c__Thermotogae.o__Thermotogales.f__Thermotogaceae.g__Pseudothermotoga	k__Bacteria.p__Firmicutes.c__Bacilli.o__Lactobacillales.f__Leuconostocaceae.g__Leuconostoc
k__Bacteria.p__Nitrospirae.c__Nitrospira.o__Nitrospirales.f__Nitrospiraceae.g__Nitrospira	k__Bacteria.p__Actinobacteria.c__Actinobacteria.o__Micrococcales.f__Microbacteriaceae.g__Mycetocola
k__Bacteria.p__Proteobacteria.c__Gammaproteobacteria.g__Sedimenticola	k__Bacteria.p__Actinobacteria.c__Actinobacteria.o__Propionibacteriales.f__Propionibacteriaceae.g__Microlunatus
k__Bacteria.p__Firmicutes.c__Clostridia.o__Clostridiales.g__Gottschalkia	k__Bacteria.p__Bacteroidetes.c__Flavobacteriia.o__Flavobacteriales.f__Flavobacteriaceae.g__Nonlabens
k__Bacteria.p__Spirochaetes.c__Spirochaetia.f__Leptospiraceae.g__Turneriella	k__Bacteria.p__Proteobacteria.c__Alphaproteobacteria.o__Rhizobiales.f__Phyllobacteriaceae.g__Aquamicrobium
k__Bacteria.p__Bacteroidetes.c__Bacteroidia.o__Bacteroidales.f__Porphyromonadaceae.g__Porphyromonas	k__Bacteria.g__Thermobaculum
k__Bacteria.p__Proteobacteria.c__Alphaproteobacteria.o__Rhizobiales.f__Rhizobiaceae.g__Rhizobium	k__Bacteria.p__Bacteroidetes.c__Flavobacteriia.o__Flavobacteriales.f__Flavobacteriaceae.g__Aequorivita
k__Bacteria.p__Proteobacteria.c__Alphaproteobacteria.o__Rhizobiales.f__Phyllobacteriaceae.g__Paramesorhizobium	k__Bacteria.p__Bacteroidetes.c__Flavobacteriia.o__Flavobacteriales.f__Flavobacteriaceae.g__Gramella
k__Bacteria.p__Firmicutes.c__Clostridia.o__Clostridiales.f__Peptococcaceae.g__Syntrophobotulus	k__Bacteria.p__Proteobacteria.c__Gammaproteobacteria.o__Oceanospirillales.f__Halomonadaceae.g__Chromohalobacter
k__Bacteria.p__Firmicutes.c__Bacilli.o__Lactobacillales.f__Enterococcaceae.g__Tetragenococcus	k__Archaea.p__Euryarchaeota.c__Methanomicrobia.o__Methanomicrobiales.f__Methanoregulaceae.g__Methanosphaerula
k__Bacteria.p__Actinobacteria.c__Actinobacteria.o__Micrococcales.f__Micrococcaceae.g__Renibacterium	k__Bacteria.p__Actinobacteria.c__Coriobacteriia.o__Eggerthellales.f__Eggerthellaceae.g__Slackia
k__Bacteria.p__Firmicutes.c__Negativicutes.o__Selenomonadales.f__Sporomusaceae.g__Anaeromusa	k__Bacteria.p__Bacteroidetes.c__Bacteroidia.o__Bacteroidales.f__Prevotellaceae.g__Hallella
k__Bacteria.p__Firmicutes.c__Clostridia.o__Clostridiales.f__Ruminococcaceae.g__Candidatus_Soleaferrea	k__Bacteria.p__Firmicutes.c__Bacilli.o__Bacillales.f__Paenibacillaceae.g__Gorillibacterium
k__Bacteria.p__Actinobacteria.c__Actinobacteria.o__Micrococcales.f__Microbacteriaceae.g__Frigoribacterium	k__Bacteria.p__Firmicutes.c__Negativicutes.o__Veillonellales.f__Veillonellaceae.g__Veillonella
k__Archaea.p__Euryarchaeota.c__Halobacteria.o__Natrialbales.f__Natrialbaceae.g__Halopiger	k__Bacteria.p__Proteobacteria.c__Alphaproteobacteria.o__Rhizobiales.f__Hyphomicrobiaceae.g__Maritalea
k__Bacteria.p__Firmicutes.c__Clostridia.o__Halanaerobiales.f__Halobacteroidaceae.g__Halobacteroides	k__Bacteria.p__Firmicutes.c__Clostridia.o__Clostridiales.f__Lachnospiraceae.g__Roseburia
k__Bacteria.p__Bacteroidetes.c__Flavobacteriia.o__Flavobacteriales.f__Flavobacteriaceae.g__Sediminicola	k__Bacteria.p__Proteobacteria.c__Gammaproteobacteria.o__Enterobacteriales.f__Enterobacteriaceae.g__Morganella
k__Bacteria.p__Actinobacteria.c__Actinobacteria.o__Micrococcales.f__Dermatophilaceae.g__Dermatophilus	k__Bacteria.p__Proteobacteria.c__Gammaproteobacteria.o__Enterobacteriales.f__Enterobacteriaceae.g__Rouxiella
k__Bacteria.p__Proteobacteria.c__Alphaproteobacteria.o__Rhodospirillales.f__Rhodospirillaceae.g__Dongia	k__Archaea.p__Euryarchaeota.c__Halobacteria.o__Halobacteriales.f__Halobacteriaceae.g__Natronomonas
k__Archaea.p__Thaumarchaeota.o__Nitrosopumilales.f__Nitrosopumilaceae.g__Nitrosopumilus	k__Bacteria.p__Firmicutes.c__Clostridia.o__Clostridiales.f__Lachnospiraceae.g__Lachnobacterium
k__Bacteria.p__Firmicutes.c__Bacilli.o__Bacillales.f__Bacillaceae.g__Marinococcus	k__Bacteria.p__Firmicutes.c__Clostridia.o__Clostridiales.g__Epulopiscium
k__Bacteria.p__Proteobacteria.c__Gammaproteobacteria.o__Pasteurellales.f__Pasteurellaceae.g__Muribacter	k__Bacteria.p__Chloroflexi.c__Chloroflexia.o__Chloroflexales.f__Roseiflexaceae.g__Roseiflexus
k__Bacteria.p__Spirochaetes.c__Spirochaetia.f__Leptospiraceae.g__Leptospira	k__Archaea.p__Crenarchaeota.c__Thermoprotei.o__Sulfolobales.f__Sulfolobaceae.g__Acidianus
k__Bacteria.p__Proteobacteria.c__Deltaproteobacteria.o__Desulfobacterales.f__Desulfobacteraceae.g__Desulfobacula	k__Bacteria.p__Firmicutes.c__Tissierellia.o__Tissierellales.f__Peptoniphilaceae.g__Peptoniphilus
k__Bacteria.p__Firmicutes.c__Bacilli.o__Bacillales.f__Paenibacillaceae.g__Cohnella	k__Bacteria.p__Bacteroidetes.c__Chitinophagia.o__Chitinophagales.f__Chitinophagaceae.g__Niastella
k__Archaea.p__Euryarchaeota.c__Methanomicrobia.o__Methanomicrobiales.f__Methanomicrobiaceae.g__Methanoculleus	k__Bacteria.p__Proteobacteria.c__Alphaproteobacteria.o__Rhodobacterales.f__Rhodobacteraceae.g__Maribius
k__Bacteria.p__Bacteroidetes.o__Bacteroidetes_Order_II._Incertae_sedis.f__Rhodothermaceae.g__Salinibacter	k__Bacteria.p__Actinobacteria.c__Coriobacteriia.o__Eggerthellales.f__Eggerthellaceae.g__Enterorhabdus
k__Bacteria.p__Proteobacteria.c__Gammaproteobacteria.o__Enterobacteriales.f__Enterobacteriaceae.g__Enterobacter	k__Bacteria.p__Firmicutes.c__Bacilli.o__Lactobacillales.f__Aerococcaceae.g__Abiotrophia
k__Bacteria.p__Proteobacteria.c__Alphaproteobacteria.o__Rhodobacterales.f__Rhodobacteraceae.g__Oceaniovalibus	k__Bacteria.p__Cyanobacteria.o__Chroococcales.g__Crocosphaera
k__Bacteria.p__Proteobacteria.c__Gammaproteobacteria.o__Cellvibrionales.f__Spongiibacteraceae.g__Dasania	k__Bacteria.p__Proteobacteria.c__Alphaproteobacteria.o__Magnetococcales.f__Magnetococcaceae.g__Magnetococcus
k__Bacteria.p__Proteobacteria.c__Betaproteobacteria.o__Burkholderiales.f__Comamonadaceae.g__Acidovorax	k__Bacteria.p__Chloroflexi.c__Anaerolineae.o__Anaerolineales.f__Anaerolineaceae.g__Flexilinea
k__Bacteria.p__Aquificae.c__Aquificae.o__Aquificales.f__Aquificaceae.g__Aquifex	k__Archaea.p__Euryarchaeota.c__Halobacteria.o__Haloferacales.f__Haloferacaceae.g__Haloquadratum
k__Bacteria.p__Bacteroidetes.c__Cytophagia.o__Cytophagales.f__Hymenobacteraceae.g__Adhaeribacter	k__Bacteria.p__Planctomycetes.c__Planctomycetia.o__Planctomycetales.f__Planctomycetaceae.g__Pirellula
k__Bacteria.p__Proteobacteria.c__Gammaproteobacteria.o__Alteromonadales.f__Moritellaceae.g__Moritella	k__Archaea.p__Crenarchaeota.c__Thermoprotei.o__Desulfurococcales.f__Desulfurococcaceae.g__Desulfurococcus
k__Bacteria.p__Bacteroidetes.c__Flavobacteriia.o__Flavobacteriales.f__Flavobacteriaceae.g__Myroides	k__Bacteria.p__Cyanobacteria.o__Prochlorales.f__Prochlorococcaceae.g__Prochlorococcus
k__Bacteria.p__Proteobacteria.c__Gammaproteobacteria.o__Alteromonadales.f__Alteromonadaceae.g__Alishewanella	k__Bacteria.p__Proteobacteria.c__Alphaproteobacteria.o__Rhodospirillales.f__Rhodospirillaceae.g__Caenispirillum
k__Bacteria.p__Firmicutes.c__Bacilli.o__Bacillales.g__Exiguobacterium	k__Bacteria.p__Proteobacteria.c__Alphaproteobacteria.o__Rhodobacterales.f__Rhodobacteraceae.g__Paracoccus
k__Bacteria.p__Proteobacteria.c__Gammaproteobacteria.o__Methylococcales.f__Methylococcaceae.g__Methylomicrobium	k__Bacteria.p__Firmicutes.c__Bacilli.o__Bacillales.f__Staphylococcaceae.g__Macrococcus
k__Bacteria.p__Proteobacteria.c__Alphaproteobacteria.o__Rhodobacterales.f__Rhodobacteraceae.g__Haematobacter	k__Bacteria.p__Actinobacteria.c__Actinobacteria.o__Micrococcales.f__Microbacteriaceae.g__Clavibacter
k__Bacteria.p__Proteobacteria.c__Deltaproteobacteria.o__Myxococcales.f__Anaeromyxobacteraceae.g__Anaeromyxobacter	k__Bacteria.p__Proteobacteria.c__Gammaproteobacteria.o__Cellvibrionales.f__Cellvibrionaceae.g__Cellvibrio
k__Bacteria.p__Proteobacteria.c__Alphaproteobacteria.o__Rhodobacterales.f__Rhodobacteraceae.g__Nautella	k__Bacteria.p__Bacteroidetes.c__Cytophagia.o__Cytophagales.f__Cyclobacteriaceae.g__Echinicola
k__Bacteria.p__Proteobacteria.c__Betaproteobacteria.o__Burkholderiales.f__Burkholderiaceae.g__Candidatus_Glomeribacter	k__Bacteria.p__Actinobacteria.c__Actinobacteria.o__Streptosporangiales.f__Nocardiopsaceae.g__Nocardiopsis
k__Bacteria.p__Firmicutes.c__Clostridia.o__Clostridiales.f__Peptococcaceae.g__Thermincola	k__Bacteria.p__Bacteroidetes.c__Flavobacteriia.o__Flavobacteriales.f__Flavobacteriaceae.g__Tenacibaculum
k__Bacteria.p__Bacteroidetes.c__Chitinophagia.o__Chitinophagales.f__Chitinophagaceae.g__Segetibacter	k__Bacteria.p__Actinobacteria.c__Actinobacteria.o__Micrococcales.f__Microbacteriaceae.g__Herbiconiux
k__Bacteria.p__Actinobacteria.c__Actinobacteria.o__Micrococcales.f__Microbacteriaceae.g__Glaciibacter	k__Bacteria.p__Armatimonadetes.c__Chthonomonadetes.o__Chthonomonadales.f__Chthonomonadaceae.g__Chthonomonas
k__Bacteria.p__Firmicutes.c__Bacilli.o__Bacillales.f__Bacillaceae.g__Amphibacillus	k__Bacteria.p__Firmicutes.c__Clostridia.o__Clostridiales.f__Syntrophomonadaceae.g__Syntrophothermus
k__Bacteria.p__Actinobacteria.c__Actinobacteria.o__Glycomycetales.f__Glycomycetaceae.g__Stackebrandtia	k__Bacteria.p__Bacteroidetes.c__Flavobacteriia.o__Flavobacteriales.f__Flavobacteriaceae.g__Riemerella
k__Bacteria.p__Spirochaetes.c__Spirochaetia.f__Leptospiraceae.g__Leptonema	k__Bacteria.p__Cyanobacteria.o__Chroococcales.g__Cyanothece
k__Bacteria.p__Proteobacteria.c__Alphaproteobacteria.o__Rickettsiales.f__Anaplasmataceae.g__Candidatus_Neoehrlichia	k__Archaea.p__Euryarchaeota.c__Halobacteria.o__Halobacteriales.f__Halobacteriaceae.g__Haloarcula
k__Bacteria.p__Proteobacteria.c__Gammaproteobacteria.o__Alteromonadales.f__Colwelliaceae.g__Thalassomonas	k__Bacteria.p__Proteobacteria.c__Betaproteobacteria.o__Burkholderiales.f__Burkholderiaceae.g__Burkholderia
k__Bacteria.p__Chlorobi.c__Chlorobia.o__Chlorobiales.f__Chlorobiaceae.g__Chlorobium	k__Bacteria.p__Proteobacteria.c__Deltaproteobacteria.o__Desulfobacterales.f__Desulfobulbaceae.g__Desulfobulbus
k__Bacteria.p__Firmicutes.c__Bacilli.o__Bacillales.f__Planococcaceae.g__Paenisporosarcina	k__Bacteria.p__Elusimicrobia.c__Elusimicrobia.o__Elusimicrobiales.f__Elusimicrobiaceae.g__Elusimicrobium
k__Bacteria.p__Planctomycetes.c__Planctomycetia.o__Planctomycetales.f__Planctomycetaceae.g__Gemmata	k__Bacteria.p__Firmicutes.c__Bacilli.o__Lactobacillales.f__Carnobacteriaceae.g__Dolosigranulum
k__Bacteria.p__Actinobacteria.c__Actinobacteria.o__Frankiales.f__Frankiaceae.g__Frankia	k__Bacteria.p__Bacteroidetes.c__Cytophagia.o__Cytophagales.f__Hymenobacteraceae.g__Pontibacter
k__Bacteria.p__Bacteroidetes.c__Flavobacteriia.o__Flavobacteriales.f__Flavobacteriaceae.g__Gillisia	k__Bacteria.p__Actinobacteria.c__Coriobacteriia.o__Eggerthellales.f__Eggerthellaceae.g__Gordonibacter
k__Bacteria.p__Proteobacteria.c__Alphaproteobacteria.o__Sphingomonadales.f__Erythrobacteraceae.g__Porphyrobacter	k__Bacteria.p__Proteobacteria.c__Betaproteobacteria.o__Burkholderiales.f__Comamonadaceae.g__Hydrogenophaga
k__Bacteria.p__Acidobacteria.c__Acidobacteriia.o__Acidobacteriales.f__Acidobacteriaceae.g__Terriglobus	k__Bacteria.p__Actinobacteria.c__Actinobacteria.o__Micrococcales.f__Cellulomonadaceae.g__Cellulomonas
k__Bacteria.p__Firmicutes.c__Tissierellia.o__Tissierellales.f__Peptoniphilaceae.g__Parvimonas	k__Bacteria.p__Bacteroidetes.c__Chitinophagia.o__Chitinophagales.f__Saprospiraceae.g__Phaeodactylibacter
k__Bacteria.p__Elusimicrobia.c__Elusimicrobia.o__Elusimicrobiales.f__Elusimicrobiaceae.g__Elusimicrobium	k__Archaea.p__Euryarchaeota.c__Halobacteria.o__Haloferacales.f__Haloferacaceae.g__Halorubrum
k__Bacteria.p__Proteobacteria.c__Alphaproteobacteria.o__Rhizobiales.f__Beijerinckiaceae.g__Methylocapsa	k__Bacteria.p__Actinobacteria.c__Actinobacteria.o__Corynebacteriales.f__Mycobacteriaceae.g__Amycolicicoccus
k__Bacteria.p__Actinobacteria.c__Actinobacteria.o__Micrococcales.f__Microbacteriaceae.g__Plantibacter	k__Bacteria.p__Fibrobacteres.c__Fibrobacteria.o__Fibrobacterales.f__Fibrobacteraceae.g__Fibrobacter
k__Bacteria.p__Proteobacteria.c__Alphaproteobacteria.o__Sphingomonadales.f__Sphingomonadaceae.g__Sphingomonas	k__Bacteria.p__Firmicutes.c__Bacilli.o__Bacillales.f__Staphylococcaceae.g__Jeotgalicoccus
k__Bacteria.p__Firmicutes.c__Clostridia.o__Clostridiales.f__Clostridiaceae.g__Thermobrachium	k__Bacteria.p__Actinobacteria.c__Actinobacteria.o__Micrococcales.f__Dermacoccaceae.g__Demetria
k__Bacteria.p__Planctomycetes.c__Planctomycetia.o__Candidatus_Brocadiales.f__Candidatus_Brocadiaceae.g__Candidatus_Jettenia	k__Bacteria.p__Proteobacteria.c__Alphaproteobacteria.o__Rhodobacterales.f__Rhodobacteraceae.g__Halocynthiibacter
k__Bacteria.p__Bacteroidetes.c__Bacteroidia.o__Bacteroidales.f__Odoribacteraceae.g__Odoribacter	k__Bacteria.p__Cyanobacteria.o__Nostocales.f__Nostocaceae.g__Trichormus
k__Bacteria.p__Proteobacteria.c__Gammaproteobacteria.o__Pseudomonadales.f__Ventosimonadaceae.g__Ventosimonas	k__Bacteria.p__Proteobacteria.c__Deltaproteobacteria.o__Desulfurellales.f__Desulfurellaceae.g__Desulfurella
k__Bacteria.p__Actinobacteria.c__Coriobacteriia.o__Coriobacteriales.f__Atopobiaceae.g__Olsenella	k__Bacteria.p__Firmicutes.c__Clostridia.o__Clostridiales.f__Lachnospiraceae.g__Tyzzerella
k__Bacteria.p__Firmicutes.c__Clostridia.o__Clostridiales.f__Lachnospiraceae.g__Shuttleworthia	k__Bacteria.p__Chloroflexi.c__Anaerolineae.o__Anaerolineales.f__Anaerolineaceae.g__Bellilinea
k__Bacteria.p__Proteobacteria.c__Gammaproteobacteria.o__Alteromonadales.f__Alteromonadaceae.g__Marinobacter	k__Bacteria.p__Chrysiogenetes.c__Chrysiogenetes.o__Chrysiogenales.f__Chrysiogenaceae.g__Chrysiogenes
k__Bacteria.p__Proteobacteria.c__Gammaproteobacteria.o__Aeromonadales.f__Aeromonadaceae.g__Tolumonas	k__Archaea.p__Thaumarchaeota.o__Nitrosopumilales.f__Nitrosopumilaceae.g__Nitrosopumilus
k__Bacteria.p__Cyanobacteria.o__Oscillatoriales.g__Geitlerinema	k__Bacteria.p__Firmicutes.c__Clostridia.o__Thermoanaerobacterales.f__Thermoanaerobacteraceae.g__Carboxydothermus
k__Bacteria.p__Proteobacteria.c__Alphaproteobacteria.o__Rickettsiales.g__Candidatus_Hepatobacter	k__Bacteria.p__Proteobacteria.c__Gammaproteobacteria.o__Enterobacteriales.f__Enterobacteriaceae.g__Pantoea
k__Bacteria.p__Actinobacteria.c__Actinobacteria.o__Micrococcales.f__Microbacteriaceae.g__Gulosibacter	k__Bacteria.p__Proteobacteria.c__Gammaproteobacteria.o__Alteromonadales.f__Alteromonadaceae.g__Marinobacter
k__Bacteria.p__Proteobacteria.c__Alphaproteobacteria.o__Rhodospirillales.f__Rhodospirillaceae.g__Magnetospirillum	k__Bacteria.p__Actinobacteria.c__Actinobacteria.o__Micrococcales.f__Microbacteriaceae.g__Leucobacter
k__Bacteria.p__Firmicutes.c__Bacilli.o__Lactobacillales.f__Leuconostocaceae.g__Weissella	k__Bacteria.p__Proteobacteria.c__Alphaproteobacteria.o__Sphingomonadales.f__Sphingomonadaceae.g__Novosphingobium
k__Bacteria.p__Firmicutes.c__Bacilli.o__Bacillales.f__Staphylococcaceae.g__Jeotgalicoccus	k__Bacteria.p__Proteobacteria.c__Epsilonproteobacteria.o__Nautiliales.f__Nautiliaceae.g__Nautilia
k__Bacteria.p__Proteobacteria.c__Deltaproteobacteria.o__Desulfovibrionales.f__Desulfovibrionaceae.g__Desulfovibrio	k__Bacteria.p__Firmicutes.c__Bacilli.o__Lactobacillales.f__Lactobacillaceae.g__Pediococcus
k__Bacteria.p__Proteobacteria.c__Gammaproteobacteria.o__Xanthomonadales.f__Xanthomonadaceae.g__Xylella	k__Bacteria.p__Cyanobacteria.o__Nostocales.f__Microchaetaceae.g__Microchaete
k__Bacteria.p__Proteobacteria.c__Deltaproteobacteria.o__Desulfovibrionales.f__Desulfohalobiaceae.g__Desulfovermiculus	k__Bacteria.p__Cyanobacteria.o__Nostocales.f__Nostocaceae.g__Dolichospermum
k__Bacteria.p__Proteobacteria.c__Alphaproteobacteria.o__Rhodobacterales.f__Rhodobacteraceae.g__Paenirhodobacter	k__Bacteria.p__Actinobacteria.c__Actinobacteria.o__Actinomycetales.f__Actinomycetaceae.g__Trueperella
k__Bacteria.p__Firmicutes.c__Bacilli.o__Bacillales.f__Paenibacillaceae.g__Saccharibacillus	k__Bacteria.p__Proteobacteria.c__Betaproteobacteria.o__Burkholderiales.f__Alcaligenaceae.g__Brackiella
k__Bacteria.p__Proteobacteria.c__Alphaproteobacteria.o__Rhodobacterales.f__Rhodobacteraceae.g__Puniceibacterium	k__Bacteria.p__Bacteroidetes.c__Bacteroidia.o__Bacteroidales.f__Porphyromonadaceae.g__Proteiniphilum
k__Bacteria.p__Bacteroidetes.c__Bacteroidia.o__Bacteroidales.f__Rikenellaceae.g__Alistipes	k__Bacteria.p__Proteobacteria.c__Alphaproteobacteria.o__Pelagibacterales.f__Pelagibacteraceae.g__Candidatus_Pelagibacter
k__Bacteria.p__Cyanobacteria.o__Chroococcales.g__Rubidibacter	k__Bacteria.p__Firmicutes.c__Clostridia.o__Clostridiales.f__Ruminococcaceae.g__Pseudobacteroides
k__Bacteria.p__Actinobacteria.c__Actinobacteria.o__Micromonosporales.f__Micromonosporaceae.g__Asanoa	k__Bacteria.p__Synergistetes.c__Synergistia.o__Synergistales.f__Synergistaceae.g__Aminobacterium
k__Bacteria.p__Deferribacteres.c__Deferribacteres.o__Deferribacterales.f__Deferribacteraceae.g__Caldithrix	k__Bacteria.p__Firmicutes.c__Clostridia.o__Clostridiales.f__Clostridiales_Family_XIII._Incertae_Sedis.g__Mogibacterium
k__Bacteria.p__Actinobacteria.c__Actinobacteria.o__Pseudonocardiales.f__Pseudonocardiaceae.g__Thermocrispum	k__Bacteria.p__Firmicutes.c__Bacilli.o__Bacillales.f__Alicyclobacillaceae.g__Alicyclobacillus
k__Bacteria.p__Actinobacteria.c__Actinobacteria.o__Actinomycetales.f__Actinomycetaceae.g__Arcanobacterium	k__Bacteria.p__Planctomycetes.c__Phycisphaerae.o__Phycisphaerales.f__Phycisphaeraceae.g__Phycisphaera
k__Bacteria.p__Cyanobacteria.o__Oscillatoriales.g__Nodosilinea	k__Archaea.p__Euryarchaeota.c__Thermoplasmata.o__Methanomassiliicoccales.f__Methanomassiliicoccaceae.g__Methanomassiliicoccus
k__Bacteria.p__Actinobacteria.c__Actinobacteria.o__Propionibacteriales.f__Nocardioidaceae.g__Pimelobacter	k__Bacteria.p__Actinobacteria.c__Actinobacteria.o__Actinomycetales.f__Actinomycetaceae.g__Flaviflexus
k__Bacteria.p__Actinobacteria.c__Actinobacteria.o__Micrococcales.f__Dermacoccaceae.g__Kytococcus	k__Bacteria.p__Firmicutes.c__Bacilli.o__Lactobacillales.f__Carnobacteriaceae.g__Allofustis
k__Bacteria.p__Proteobacteria.c__Betaproteobacteria.o__Methylophilales.f__Methylophilaceae.g__Methylovorus	k__Bacteria.p__Firmicutes.c__Bacilli.o__Bacillales.f__Bacillaceae.g__Paucisalibacillus
k__Bacteria.p__Proteobacteria.c__Alphaproteobacteria.o__Rhizobiales.f__Bartonellaceae.g__Bartonella	k__Bacteria.p__Firmicutes.c__Negativicutes.o__Selenomonadales.f__Selenomonadaceae.g__Centipeda
k__Archaea.p__Euryarchaeota.c__Methanomicrobia.o__Methanosarcinales.f__Candidatus_Methanoperedenaceae.g__Candidatus_Methanoperedens	k__Bacteria.p__Proteobacteria.c__Alphaproteobacteria.o__Rhodobacterales.f__Rhodobacteraceae.g__Celeribacter
k__Bacteria.p__Actinobacteria.c__Actinobacteria.o__Micrococcales.f__Micrococcaceae.g__Micrococcus	k__Bacteria.p__Actinobacteria.c__Actinobacteria.o__Streptosporangiales.f__Thermomonosporaceae.g__Thermomonospora
k__Bacteria.p__Chloroflexi.c__Anaerolineae.o__Anaerolineales.f__Anaerolineaceae.g__Bellilinea	k__Bacteria.p__Firmicutes.c__Clostridia.o__Thermoanaerobacterales.f__Thermoanaerobacterales_Family_IV._Incertae_Sedis.g__Mahella
k__Bacteria.p__Proteobacteria.c__Betaproteobacteria.o__Burkholderiales.f__Alcaligenaceae.g__Bordetella	k__Bacteria.p__Firmicutes.c__Bacilli.o__Lactobacillales.f__Enterococcaceae.g__Tetragenococcus
k__Bacteria.p__Proteobacteria.c__Deltaproteobacteria.o__Desulfuromonadales.f__Desulfuromonadaceae.g__Pelobacter	k__Bacteria.p__Verrucomicrobia.c__Opitutae.o__Opitutales.f__Opitutaceae.g__Opitutus
k__Bacteria.p__Proteobacteria.c__Alphaproteobacteria.o__Rhizobiales.f__Hyphomicrobiaceae.g__Cucumibacter	k__Bacteria.p__Proteobacteria.c__Alphaproteobacteria.o__Rhizobiales.f__Beijerinckiaceae.g__Beijerinckia
k__Bacteria.p__Proteobacteria.c__Alphaproteobacteria.o__Rhodobacterales.f__Rhodobacteraceae.g__Pseudooceanicola	k__Bacteria.p__Actinobacteria.c__Actinobacteria.o__Micrococcales.f__Micrococcaceae.g__Pseudarthrobacter
k__Bacteria.p__Proteobacteria.c__Alphaproteobacteria.o__Rhodobacterales.f__Rhodobacteraceae.g__Sedimentitalea	k__Bacteria.p__Bacteroidetes.c__Cytophagia.o__Cytophagales.f__Cyclobacteriaceae.g__Lunatimonas
k__Bacteria.p__Proteobacteria.c__Betaproteobacteria.o__Burkholderiales.f__Comamonadaceae.g__Xenophilus	k__Bacteria.p__Cyanobacteria.o__Oscillatoriales.g__Kamptonema
k__Bacteria.p__Chloroflexi.c__Anaerolineae.o__Anaerolineales.f__Anaerolineaceae.g__Thermanaerothrix	k__Bacteria.p__Proteobacteria.c__Alphaproteobacteria.o__Rhizobiales.f__Methylobacteriaceae.g__Meganema
k__Bacteria.p__Proteobacteria.c__Deltaproteobacteria.o__Desulfovibrionales.f__Desulfovibrionaceae.g__Lawsonia	k__Bacteria.p__Firmicutes.c__Bacilli.o__Lactobacillales.f__Streptococcaceae.g__Streptococcus
k__Archaea.p__Euryarchaeota.c__Halobacteria.o__Halobacteriales.f__Halobacteriaceae.g__Halanaeroarchaeum	k__Bacteria.p__Proteobacteria.c__Deltaproteobacteria.o__Desulfovibrionales.f__Desulfohalobiaceae.g__Desulfohalobium
k__Bacteria.p__Proteobacteria.c__Alphaproteobacteria.o__Rhizobiales.f__Hyphomicrobiaceae.g__Blastochloris	k__Bacteria.p__Acidobacteria.c__Acidobacteriia.o__Acidobacteriales.f__Acidobacteriaceae.g__Terriglobus
k__Bacteria.p__Proteobacteria.c__Gammaproteobacteria.o__Enterobacteriales.f__Enterobacteriaceae.g__Moellerella	k__Bacteria.p__Bacteroidetes.c__Chitinophagia.o__Chitinophagales.f__Chitinophagaceae.g__Niabella
k__Bacteria.p__Proteobacteria.c__Gammaproteobacteria.o__Oceanospirillales.f__Oceanospirillaceae.g__Marinomonas	k__Bacteria.p__Bacteroidetes.c__Flavobacteriia.o__Flavobacteriales.f__Flavobacteriaceae.g__Elizabethkingia
k__Bacteria.p__Firmicutes.c__Clostridia.o__Clostridiales.f__Christensenellaceae.g__Christensenella	k__Bacteria.p__Proteobacteria.c__Epsilonproteobacteria.o__Campylobacterales.f__Helicobacteraceae.g__Sulfuricurvum
k__Bacteria.p__Bacteroidetes.c__Flavobacteriia.o__Flavobacteriales.f__Flavobacteriaceae.g__Arenibacter	k__Bacteria.p__Firmicutes.c__Clostridia.o__Clostridiales.f__Peptococcaceae.g__Thermincola
k__Bacteria.p__Thermotogae.c__Thermotogae.o__Kosmotogales.f__Kosmotogaceae.g__Kosmotoga	k__Bacteria.p__Actinobacteria.c__Coriobacteriia.o__Coriobacteriales.f__Atopobiaceae.g__Olsenella
k__Bacteria.p__Verrucomicrobia.c__Opitutae.o__Puniceicoccales.f__Puniceicoccaceae.g__Coraliomargarita	k__Bacteria.p__Spirochaetes.c__Spirochaetia.o__Spirochaetales.f__Spirochaetaceae.g__Spirochaeta
k__Bacteria.p__Actinobacteria.c__Actinobacteria.o__Kineosporiales.f__Kineosporiaceae.g__Kineosporia	k__Bacteria.p__Firmicutes.c__Bacilli.o__Bacillales.g__Exiguobacterium
k__Bacteria.p__Proteobacteria.c__Alphaproteobacteria.o__Rhizobiales.f__Beijerinckiaceae.g__Chelatococcus	k__Bacteria.p__Cyanobacteria.o__Pleurocapsales.g__Pleurocapsa
k__Bacteria.p__Proteobacteria.c__Gammaproteobacteria.o__Cellvibrionales.f__Cellvibrionaceae.g__Cellvibrio	k__Bacteria.p__Proteobacteria.c__Gammaproteobacteria.o__Chromatiales.f__Ectothiorhodospiraceae.g__Nitrococcus
k__Bacteria.p__Actinobacteria.c__Rubrobacteria.o__Rubrobacterales.f__Rubrobacteraceae.g__Rubrobacter	k__Bacteria.p__Proteobacteria.c__Gammaproteobacteria.o__Methylococcales.f__Methylococcaceae.g__Methylomarinum
k__Bacteria.p__Proteobacteria.c__Alphaproteobacteria.o__Rhodobacterales.f__Rhodobacteraceae.g__Thalassobium	k__Bacteria.p__Actinobacteria.c__Coriobacteriia.o__Coriobacteriales.f__Atopobiaceae.g__Atopobium
k__Bacteria.p__Cyanobacteria.o__Nostocales.f__Microchaetaceae.g__Microchaete	k__Bacteria.p__Actinobacteria.c__Actinobacteria.o__Micromonosporales.f__Micromonosporaceae.g__Asanoa
k__Bacteria.p__Actinobacteria.c__Actinobacteria.o__Micrococcales.f__Intrasporangiaceae.g__Ornithinimicrobium	k__Bacteria.p__Proteobacteria.c__Gammaproteobacteria.o__Cellvibrionales.f__Cellvibrionaceae.g__Marinagarivorans
k__Bacteria.p__Bacteroidetes.c__Bacteroidia.o__Bacteroidales.f__Porphyromonadaceae.g__Tannerella	k__Bacteria.p__Planctomycetes.c__Planctomycetia.o__Candidatus_Brocadiales.f__Candidatus_Brocadiaceae.g__Candidatus_Jettenia
k__Bacteria.p__Chloroflexi.c__Thermomicrobia.o__Thermomicrobiales.f__Thermomicrobiaceae.g__Thermomicrobium	k__Bacteria.p__Firmicutes.c__Clostridia.o__Halanaerobiales.f__Halobacteroidaceae.g__Halobacteroides
k__Bacteria.p__Planctomycetes.c__Planctomycetia.o__Planctomycetales.f__Planctomycetaceae.g__Blastopirellula	k__Bacteria.p__Proteobacteria.c__Gammaproteobacteria.o__Oceanospirillales.f__Halomonadaceae.g__Cobetia
k__Bacteria.p__Firmicutes.c__Bacilli.o__Lactobacillales.f__Enterococcaceae.g__Enterococcus	k__Archaea.p__Euryarchaeota.c__Methanomicrobia.o__Methanosarcinales.f__Methanosarcinaceae.g__Methanohalophilus
k__Archaea.p__Euryarchaeota.c__Halobacteria.o__Haloferacales.f__Haloferacaceae.g__Halogeometricum	k__Bacteria.p__Proteobacteria.c__Alphaproteobacteria.o__Rhizobiales.f__Methylocystaceae.g__Methylocystis
k__Bacteria.p__Firmicutes.c__Clostridia.o__Thermoanaerobacterales.f__Thermoanaerobacteraceae.g__Caldanaerobacter	k__Bacteria.p__Proteobacteria.c__Alphaproteobacteria.o__Rhodobacterales.f__Hyphomonadaceae.g__Hirschia
k__Bacteria.p__Bacteroidetes.c__Cytophagia.o__Cytophagales.f__Cytophagaceae.g__Flectobacillus	k__Bacteria.p__Proteobacteria.c__Gammaproteobacteria.o__Legionellales.f__Coxiellaceae.g__Diplorickettsia
k__Bacteria.p__Proteobacteria.c__Gammaproteobacteria.o__Enterobacteriales.f__Enterobacteriaceae.g__Cosenzaea	k__Bacteria.p__Firmicutes.c__Clostridia.o__Clostridiales.f__Lachnospiraceae.g__Coprococcus
k__Bacteria.p__Actinobacteria.c__Actinobacteria.o__Pseudonocardiales.f__Pseudonocardiaceae.g__Allokutzneria	k__Archaea.p__Crenarchaeota.c__Thermoprotei.o__Acidilobales.f__Caldisphaeraceae.g__Caldisphaera
k__Bacteria.p__Firmicutes.c__Clostridia.o__Clostridiales.f__Clostridiaceae.g__Oxobacter	k__Bacteria.p__Firmicutes.c__Bacilli.o__Bacillales.f__Bacillaceae.g__Lysinibacillus
k__Bacteria.p__Actinobacteria.c__Actinobacteria.o__Micromonosporales.f__Micromonosporaceae.g__Actinoplanes	k__Bacteria.p__Proteobacteria.c__Alphaproteobacteria.o__Rhizobiales.f__Rhizobiaceae.g__Sinorhizobium
k__Bacteria.p__Bacteroidetes.c__Bacteroidia.o__Bacteroidales.f__Prolixibacteraceae.g__Sunxiuqinia	k__Bacteria.p__Proteobacteria.c__Alphaproteobacteria.o__Rhodospirillales.f__Rhodospirillaceae.g__Oceanibaculum
k__Bacteria.p__Cyanobacteria.o__Oscillatoriales.g__Crinalium	k__Bacteria.p__Bacteroidetes.c__Bacteroidia.o__Bacteroidales.f__Odoribacteraceae.g__Butyricimonas
k__Bacteria.p__Firmicutes.c__Negativicutes.o__Selenomonadales.f__Selenomonadaceae.g__Mitsuokella	k__Bacteria.p__Firmicutes.c__Erysipelotrichia.o__Erysipelotrichales.f__Erysipelotrichaceae.g__Turicibacter
k__Bacteria.p__Cyanobacteria.o__Nostocales.f__Nostocaceae.g__Aphanizomenon	k__Bacteria.p__Proteobacteria.c__Betaproteobacteria.o__Burkholderiales.g__Mitsuaria
k__Bacteria.p__Cyanobacteria.o__Stigonematales.g__Chlorogloeopsis	k__Bacteria.p__Proteobacteria.c__Betaproteobacteria.o__Burkholderiales.f__Comamonadaceae.g__Pseudorhodoferax
k__Bacteria.p__Firmicutes.c__Bacilli.o__Lactobacillales.f__Enterococcaceae.g__Vagococcus	k__Bacteria.p__Cyanobacteria.o__Stigonematales.g__Mastigocladopsis
k__Bacteria.p__Firmicutes.c__Clostridia.o__Clostridiales.f__Lachnospiraceae.g__Coprococcus	k__Bacteria.p__Bacteroidetes.c__Bacteroidia.o__Bacteroidales.f__Bacteroidaceae.g__Bacteroides
k__Bacteria.p__Actinobacteria.c__Actinobacteria.o__Propionibacteriales.f__Nocardioidaceae.g__Nocardioides	k__Bacteria.p__Chlorobi.c__Chlorobia.o__Chlorobiales.f__Chlorobiaceae.g__Pelodictyon
k__Bacteria.p__Chlamydiae.c__Chlamydiia.o__Chlamydiales.f__Criblamydiaceae.g__Criblamydia	k__Bacteria.p__Firmicutes.c__Tissierellia.o__Tissierellales.f__Peptoniphilaceae.g__Helcococcus
k__Bacteria.p__Proteobacteria.c__Alphaproteobacteria.o__Rhizobiales.f__Rhodobiaceae.g__Amorphus	k__Bacteria.p__Proteobacteria.c__Gammaproteobacteria.o__Alteromonadales.f__Alteromonadaceae.g__Gayadomonas
k__Bacteria.p__Proteobacteria.c__Deltaproteobacteria.o__Syntrophobacterales.f__Syntrophobacteraceae.g__Syntrophobacter	k__Bacteria.p__Cyanobacteria.o__Chroococcales.g__Candidatus_Atelocyanobacterium
k__Bacteria.p__Actinobacteria.c__Actinobacteria.o__Micrococcales.f__Intrasporangiaceae.g__Arsenicicoccus	k__Bacteria.p__Firmicutes.c__Bacilli.o__Bacillales.f__Bacillaceae.g__Sediminibacillus
k__Bacteria.p__Proteobacteria.c__Alphaproteobacteria.o__Rhizobiales.f__Rhizobiaceae.g__Ensifer	k__Bacteria.p__Proteobacteria.c__Alphaproteobacteria.o__Rhodobacterales.f__Rhodobacteraceae.g__Thalassobacter
k__Bacteria.p__Proteobacteria.c__Betaproteobacteria.o__Burkholderiales.g__Leptothrix	k__Bacteria.p__Chloroflexi.c__Anaerolineae.o__Anaerolineales.f__Anaerolineaceae.g__Leptolinea
k__Bacteria.p__Proteobacteria.c__Alphaproteobacteria.o__Rhizobiales.f__Phyllobacteriaceae.g__Aminobacter	k__Bacteria.p__Proteobacteria.c__Gammaproteobacteria.o__Pasteurellales.f__Pasteurellaceae.g__Actinobacillus
k__Bacteria.p__Proteobacteria.c__Gammaproteobacteria.o__Enterobacteriales.f__Enterobacteriaceae.g__Raoultella	k__Bacteria.p__Actinobacteria.c__Actinobacteria.o__Streptosporangiales.f__Nocardiopsaceae.g__Streptomonospora
k__Bacteria.p__Actinobacteria.c__Actinobacteria.o__Micrococcales.f__Micrococcaceae.g__Kocuria	k__Bacteria.p__Aquificae.c__Aquificae.o__Aquificales.f__Hydrogenothermaceae.g__Sulfurihydrogenibium
k__Bacteria.p__Actinobacteria.c__Actinobacteria.o__Propionibacteriales.f__Propionibacteriaceae.g__Aestuariimicrobium	k__Bacteria.p__Proteobacteria.c__Alphaproteobacteria.o__Rhodobacterales.f__Rhodobacteraceae.g__Tateyamaria
k__Bacteria.p__Proteobacteria.c__Deltaproteobacteria.o__Desulfurellales.f__Desulfurellaceae.g__Hippea	k__Bacteria.p__Proteobacteria.c__Epsilonproteobacteria.o__Campylobacterales.f__Helicobacteraceae.g__Sulfurimonas
k__Bacteria.p__Proteobacteria.c__Alphaproteobacteria.o__Rhodospirillales.f__Rhodospirillaceae.g__Fodinicurvata	k__Bacteria.p__Bacteroidetes.c__Bacteroidia.o__Bacteroidales.f__Prevotellaceae.g__Prevotella
k__Bacteria.p__Proteobacteria.c__Betaproteobacteria.o__Burkholderiales.f__Oxalobacteraceae.g__Pseudoduganella	k__Bacteria.p__Proteobacteria.c__Gammaproteobacteria.o__Cellvibrionales.f__Halieaceae.g__Pseudohaliea
k__Archaea.p__Crenarchaeota.c__Thermoprotei.o__Sulfolobales.f__Sulfolobaceae.g__Sulfolobus	k__Bacteria.p__Proteobacteria.c__Alphaproteobacteria.o__Rhizobiales.f__Beijerinckiaceae.g__Methyloferula
k__Bacteria.p__Proteobacteria.c__Betaproteobacteria.o__Burkholderiales.f__Alcaligenaceae.g__Advenella	k__Bacteria.p__Proteobacteria.c__Betaproteobacteria.o__Hydrogenophilales.f__Hydrogenophilaceae.g__Thiobacillus
k__Bacteria.p__Firmicutes.c__Clostridia.o__Clostridiales.f__Clostridiales_Family_XVII._Incertae_Sedis.g__Thermaerobacter	k__Bacteria.p__Actinobacteria.c__Actinobacteria.o__Corynebacteriales.f__Nocardiaceae.g__Nocardia
k__Bacteria.p__Bacteroidetes.c__Flavobacteriia.o__Flavobacteriales.f__Flavobacteriaceae.g__Galbibacter	k__Bacteria.p__Proteobacteria.c__Alphaproteobacteria.o__Rhizobiales.f__Methylocystaceae.g__Terasakiella
k__Bacteria.p__Actinobacteria.c__Actinobacteria.o__Micrococcales.f__Intrasporangiaceae.g__Serinicoccus	k__Bacteria.p__Bacteroidetes.c__Flavobacteriia.o__Flavobacteriales.f__Flavobacteriaceae.g__Empedobacter
k__Bacteria.p__Bacteroidetes.c__Flavobacteriia.o__Flavobacteriales.f__Flavobacteriaceae.g__Chryseobacterium	k__Bacteria.p__Proteobacteria.c__Alphaproteobacteria.o__Rhodospirillales.f__Acetobacteraceae.g__Komagataeibacter
k__Bacteria.p__Firmicutes.c__Clostridia.o__Clostridiales.f__Ruminococcaceae.g__Acetivibrio	k__Bacteria.p__Proteobacteria.c__Alphaproteobacteria.g__Micavibrio
k__Bacteria.p__Firmicutes.c__Clostridia.o__Thermoanaerobacterales.f__Thermoanaerobacterales_Family_III._Incertae_Sedis.g__Caldicellulosiruptor	k__Bacteria.p__Proteobacteria.c__Gammaproteobacteria.o__Oceanospirillales.f__Oceanospirillaceae.g__Marinospirillum
k__Bacteria.p__Proteobacteria.c__Gammaproteobacteria.o__Thiotrichales.f__Thiotrichaceae.g__Thiothrix	k__Bacteria.p__Actinobacteria.c__Actinobacteria.o__Micrococcales.f__Microbacteriaceae.g__Rhodoluna
k__Bacteria.p__Firmicutes.c__Clostridia.o__Clostridiales.f__Clostridiaceae.g__Caloramator	k__Bacteria.p__Firmicutes.c__Erysipelotrichia.o__Erysipelotrichales.f__Erysipelotrichaceae.g__Bulleidia
k__Bacteria.p__Proteobacteria.c__Alphaproteobacteria.o__Rhizobiales.f__Rhodobiaceae.g__Tepidicaulis	k__Bacteria.p__Proteobacteria.c__Alphaproteobacteria.o__Rhodobacterales.f__Hyphomonadaceae.g__Hellea
k__Bacteria.p__Proteobacteria.c__Alphaproteobacteria.o__Rhizobiales.f__Xanthobacteraceae.g__Pseudolabrys	k__Bacteria.p__Bacteroidetes.c__Cytophagia.o__Cytophagales.f__Cytophagaceae.g__Microscilla
k__Bacteria.p__Aquificae.c__Aquificae.o__Aquificales.f__Aquificaceae.g__Thermocrinis	k__Bacteria.p__Proteobacteria.c__Betaproteobacteria.o__Neisseriales.f__Chromobacteriaceae.g__Chromobacterium
k__Bacteria.p__Proteobacteria.c__Gammaproteobacteria.o__Chromatiales.f__Ectothiorhodospiraceae.g__Arhodomonas	k__Bacteria.p__Proteobacteria.c__Gammaproteobacteria.o__Oceanospirillales.f__Hahellaceae.g__Zooshikella
k__Bacteria.p__Proteobacteria.c__Epsilonproteobacteria.o__Nautiliales.f__Nautiliaceae.g__Lebetimonas	k__Bacteria.p__Bacteroidetes.c__Cytophagia.o__Cytophagales.f__Cytophagaceae.g__Flexibacter
k__Bacteria.p__Firmicutes.c__Clostridia.o__Clostridiales.f__Peptococcaceae.g__Desulfitibacter	k__Bacteria.p__Bacteroidetes.c__Cytophagia.o__Cytophagales.f__Flammeovirgaceae.g__Flammeovirga
k__Archaea.p__Euryarchaeota.c__Thermoplasmata.o__Thermoplasmatales.f__Thermoplasmataceae.g__Thermoplasma	k__Bacteria.p__Proteobacteria.c__Gammaproteobacteria.o__Oceanospirillales.f__Oceanospirillaceae.g__Marinobacterium
k__Bacteria.p__Actinobacteria.c__Actinobacteria.o__Micrococcales.f__Jonesiaceae.g__Jonesia	k__Bacteria.p__Actinobacteria.c__Actinobacteria.o__Pseudonocardiales.f__Pseudonocardiaceae.g__Actinokineospora
k__Bacteria.p__Actinobacteria.c__Actinobacteria.o__Micrococcales.f__Dermacoccaceae.g__Demetria	k__Bacteria.p__Proteobacteria.c__Gammaproteobacteria.o__Vibrionales.f__Vibrionaceae.g__Photobacterium
k__Bacteria.p__Actinobacteria.c__Actinobacteria.o__Nakamurellales.f__Nakamurellaceae.g__Nakamurella	k__Bacteria.p__Firmicutes.c__Clostridia.o__Thermoanaerobacterales.f__Thermoanaerobacteraceae.g__Caldanaerobius
k__Bacteria.p__Bacteroidetes.c__Cytophagia.o__Cytophagales.f__Hymenobacteraceae.g__Hymenobacter	k__Bacteria.p__Proteobacteria.c__Alphaproteobacteria.o__Rhodospirillales.f__Rhodospirillaceae.g__Pararhodospirillum
k__Bacteria.p__Firmicutes.c__Bacilli.o__Bacillales.f__Bacillaceae.g__Virgibacillus	k__Bacteria.p__Firmicutes.c__Bacilli.o__Bacillales.f__Listeriaceae.g__Listeria
k__Bacteria.p__Verrucomicrobia.c__Spartobacteria.g__Candidatus_Xiphinematobacter	k__Bacteria.p__Actinobacteria.c__Actinobacteria.o__Propionibacteriales.f__Propionibacteriaceae.g__Aestuariimicrobium
k__Bacteria.p__Fibrobacteres.c__Chitinivibrionia.o__Chitinivibrionales.f__Chitinivibrionaceae.g__Chitinivibrio	k__Bacteria.p__Bacteroidetes.c__Bacteroidia.o__Bacteroidales.f__Prolixibacteraceae.g__Sunxiuqinia
k__Bacteria.p__Actinobacteria.c__Actinobacteria.o__Streptosporangiales.f__Nocardiopsaceae.g__Nocardiopsis	k__Bacteria.p__Actinobacteria.c__Actinobacteria.o__Streptosporangiales.f__Nocardiopsaceae.g__Thermobifida
k__Bacteria.p__Firmicutes.c__Clostridia.o__Clostridiales.f__Lachnospiraceae.g__Johnsonella	k__Bacteria.p__Proteobacteria.c__Betaproteobacteria.o__Neisseriales.f__Neisseriaceae.g__Kingella
k__Bacteria.p__Actinobacteria.c__Actinobacteria.o__Actinopolysporales.f__Actinopolysporaceae.g__Actinopolyspora	k__Bacteria.p__Bacteroidetes.c__Bacteroidia.o__Bacteroidales.g__Phocaeicola
k__Bacteria.p__Proteobacteria.c__Gammaproteobacteria.o__Methylococcales.f__Methylococcaceae.g__Methylovulum	k__Bacteria.p__Proteobacteria.c__Gammaproteobacteria.o__Chromatiales.f__Chromatiaceae.g__Rheinheimera
k__Archaea.p__Euryarchaeota.c__Methanomicrobia.o__Methanomicrobiales.f__Methanomicrobiaceae.g__Methanofollis	k__Bacteria.p__Ignavibacteriae.c__Ignavibacteria.o__Ignavibacteriales.f__Ignavibacteriaceae.g__Ignavibacterium
k__Bacteria.p__Proteobacteria.c__Alphaproteobacteria.o__Rhizobiales.f__Phyllobacteriaceae.g__Phyllobacterium	k__Bacteria.p__Proteobacteria.c__Deltaproteobacteria.o__Myxococcales.f__Cystobacteraceae.g__Stigmatella
k__Bacteria.p__Bacteroidetes.c__Flavobacteriia.o__Flavobacteriales.f__Blattabacteriaceae.g__Blattabacterium	k__Bacteria.p__Proteobacteria.c__Alphaproteobacteria.o__Rhizobiales.f__Hyphomicrobiaceae.g__Hyphomicrobium
k__Bacteria.p__Actinobacteria.c__Actinobacteria.o__Geodermatophilales.f__Geodermatophilaceae.g__Blastococcus	k__Bacteria.p__Proteobacteria.c__Gammaproteobacteria.o__Enterobacteriales.f__Enterobacteriaceae.g__Proteus
k__Bacteria.p__Elusimicrobia.c__Endomicrobia.o__Endomicrobiales.f__Endomicrobiaceae.g__Endomicrobium	k__Bacteria.p__Proteobacteria.c__Alphaproteobacteria.o__Rickettsiales.f__Candidatus_Midichloriaceae.g__Candidatus_Midichloria
k__Bacteria.p__Cyanobacteria.o__Nostocales.f__Nostocaceae.g__Anabaena	k__Bacteria.p__Firmicutes.c__Clostridia.o__Clostridiales.f__Lachnospiraceae.g__Robinsoniella
k__Bacteria.p__Proteobacteria.c__Alphaproteobacteria.o__Rhodobacterales.f__Rhodobacteraceae.g__Thalassobacter	k__Bacteria.p__Proteobacteria.c__Gammaproteobacteria.o__Alteromonadales.f__Colwelliaceae.g__Thalassotalea
k__Bacteria.p__Proteobacteria.c__Alphaproteobacteria.o__Rhizobiales.f__Rhizobiaceae.g__Kaistia	k__Bacteria.p__Proteobacteria.c__Gammaproteobacteria.o__Pseudomonadales.f__Moraxellaceae.g__Moraxella
k__Bacteria.p__Proteobacteria.c__Alphaproteobacteria.o__Rhizobiales.f__Bradyrhizobiaceae.g__Nitrobacter	k__Bacteria.p__Proteobacteria.c__Alphaproteobacteria.o__Rhodobacterales.f__Rhodobacteraceae.g__Shimia
k__Bacteria.p__Proteobacteria.c__Betaproteobacteria.o__Burkholderiales.f__Comamonadaceae.g__Alicycliphilus	k__Bacteria.p__Proteobacteria.c__Alphaproteobacteria.o__Rhodobacterales.f__Rhodobacteraceae.g__Jannaschia
k__Bacteria.p__Bacteroidetes.c__Sphingobacteriia.o__Sphingobacteriales.f__Sphingobacteriaceae.g__Sphingobacterium	k__Bacteria.p__Fusobacteria.c__Fusobacteriia.o__Fusobacteriales.f__Leptotrichiaceae.g__Sebaldella
k__Bacteria.p__Bacteroidetes.c__Sphingobacteriia.o__Sphingobacteriales.f__Sphingobacteriaceae.g__Pseudopedobacter	k__Bacteria.p__Proteobacteria.c__Alphaproteobacteria.o__Rhizobiales.f__Hyphomicrobiaceae.g__Rhodomicrobium
k__Bacteria.p__Proteobacteria.c__Gammaproteobacteria.o__Alteromonadales.f__Alteromonadaceae.g__Catenovulum	k__Bacteria.p__Spirochaetes.c__Spirochaetia.f__Leptospiraceae.g__Leptonema
k__Bacteria.p__Proteobacteria.c__Alphaproteobacteria.o__Rickettsiales.f__Holosporaceae.g__Holospora	k__Bacteria.p__Proteobacteria.c__Betaproteobacteria.o__Burkholderiales.g__Rubrivivax
k__Bacteria.p__Bacteroidetes.c__Cytophagia.o__Cytophagales.f__Persicobacteraceae.g__Persicobacter	k__Bacteria.p__Bacteroidetes.c__Cytophagia.o__Cytophagales.f__Cytophagaceae.g__Rhodonellum
k__Bacteria.p__Proteobacteria.c__Gammaproteobacteria.o__Methylococcales.f__Methylothermaceae.g__Methylohalobius	k__Bacteria.p__Firmicutes.c__Bacilli.o__Lactobacillales.f__Leuconostocaceae.g__Fructobacillus
k__Bacteria.p__Proteobacteria.c__Deltaproteobacteria.o__Desulfobacterales.f__Desulfobacteraceae.g__Desulfatiglans	k__Bacteria.p__Proteobacteria.c__Gammaproteobacteria.o__Enterobacteriales.f__Enterobacteriaceae.g__Hafnia
k__Bacteria.p__Actinobacteria.c__Actinobacteria.o__Corynebacteriales.g__Hoyosella	k__Archaea.p__Crenarchaeota.c__Thermoprotei.o__Thermoproteales.f__Thermofilaceae.g__Thermofilum
k__Bacteria.p__Proteobacteria.c__Deltaproteobacteria.o__Desulfovibrionales.f__Desulfohalobiaceae.g__Desulfonatronovibrio	k__Bacteria.p__Bacteroidetes.c__Cytophagia.o__Cytophagales.f__Cytophagaceae.g__Cytophaga
k__Bacteria.p__Proteobacteria.c__Betaproteobacteria.o__Neisseriales.f__Neisseriaceae.g__Conchiformibius	k__Bacteria.p__Firmicutes.c__Clostridia.o__Clostridiales.f__Peptococcaceae.g__Desulfotomaculum
k__Bacteria.p__Proteobacteria.c__Gammaproteobacteria.o__Pseudomonadales.f__Pseudomonadaceae.g__Pseudomonas	k__Bacteria.p__Firmicutes.c__Clostridia.o__Thermoanaerobacterales.f__Thermoanaerobacteraceae.g__Tepidanaerobacter
k__Bacteria.p__Firmicutes.c__Clostridia.o__Natranaerobiales.f__Natranaerobiaceae.g__Natranaerobius	k__Bacteria.p__Bacteroidetes.c__Flavobacteriia.o__Flavobacteriales.f__Flavobacteriaceae.g__Maribacter
k__Bacteria.p__Actinobacteria.c__Actinobacteria.o__Micrococcales.f__Micrococcaceae.g__Paenarthrobacter	k__Bacteria.p__Firmicutes.c__Bacilli.o__Bacillales.f__Bacillaceae.g__Halolactibacillus
k__Bacteria.p__Proteobacteria.c__Betaproteobacteria.o__Neisseriales.f__Neisseriaceae.g__Morococcus	k__Bacteria.p__Proteobacteria.c__Betaproteobacteria.o__Burkholderiales.f__Comamonadaceae.g__Acidovorax
k__Bacteria.p__Actinobacteria.c__Actinobacteria.o__Corynebacteriales.f__Corynebacteriaceae.g__Corynebacterium	k__Bacteria.p__Proteobacteria.c__Gammaproteobacteria.o__Oceanospirillales.f__Alcanivoracaceae.g__Alcanivorax
k__Bacteria.p__Actinobacteria.c__Actinobacteria.o__Micrococcales.f__Intrasporangiaceae.g__Terrabacter	k__Bacteria.p__Proteobacteria.c__Betaproteobacteria.o__Burkholderiales.f__Burkholderiaceae.g__Ralstonia
k__Bacteria.p__Proteobacteria.c__Alphaproteobacteria.o__Rhizobiales.f__Rhizobiaceae.g__Shinella	k__Bacteria.p__Chlamydiae.c__Chlamydiia.o__Chlamydiales.f__Parachlamydiaceae.g__Parachlamydia
k__Bacteria.p__Firmicutes.c__Clostridia.o__Clostridiales.f__Clostridiaceae.g__Youngiibacter	k__Bacteria.p__Proteobacteria.c__Alphaproteobacteria.o__Rhodospirillales.f__Acetobacteraceae.g__Roseomonas
k__Archaea.p__Euryarchaeota.c__Archaeoglobi.o__Archaeoglobales.f__Archaeoglobaceae.g__Geoglobus	k__Bacteria.p__Bacteroidetes.c__Bacteroidia.o__Bacteroidales.f__Porphyromonadaceae.g__Sanguibacteroides
k__Bacteria.p__Proteobacteria.c__Alphaproteobacteria.o__Sphingomonadales.f__Sphingomonadaceae.g__Sandarakinorhabdus	k__Bacteria.p__Proteobacteria.c__Betaproteobacteria.o__Burkholderiales.f__Comamonadaceae.g__Lampropedia
k__Bacteria.p__Actinobacteria.c__Actinobacteria.o__Micrococcales.f__Promicromonosporaceae.g__Cellulosimicrobium	k__Bacteria.p__Actinobacteria.c__Actinobacteria.o__Micrococcales.f__Intrasporangiaceae.g__Terrabacter
k__Bacteria.p__Bacteroidetes.c__Bacteroidia.o__Bacteroidales.f__Prevotellaceae.g__Prevotella	k__Bacteria.p__Proteobacteria.c__Gammaproteobacteria.o__Enterobacteriales.f__Enterobacteriaceae.g__Cedecea
k__Bacteria.p__Bacteroidetes.c__Flavobacteriia.o__Flavobacteriales.f__Flavobacteriaceae.g__Mesonia	k__Bacteria.p__Firmicutes.c__Clostridia.o__Clostridiales.f__Clostridiaceae.g__Caloramator
k__Bacteria.p__Proteobacteria.c__Gammaproteobacteria.o__Enterobacteriales.f__Enterobacteriaceae.g__Leclercia	k__Bacteria.p__Proteobacteria.c__Betaproteobacteria.o__Neisseriales.f__Chromobacteriaceae.g__Paludibacterium
k__Bacteria.p__Proteobacteria.c__Alphaproteobacteria.o__Rhodospirillales.f__Acetobacteraceae.g__Belnapia	k__Bacteria.p__Actinobacteria.c__Actinobacteria.o__Pseudonocardiales.f__Pseudonocardiaceae.g__Kutzneria
k__Bacteria.p__Actinobacteria.c__Actinobacteria.o__Streptosporangiales.f__Thermomonosporaceae.g__Thermomonospora	k__Bacteria.p__Proteobacteria.c__Betaproteobacteria.o__Burkholderiales.f__Comamonadaceae.g__Pseudacidovorax
k__Bacteria.p__Proteobacteria.c__Alphaproteobacteria.o__Sneathiellales.f__Sneathiellaceae.g__Sneathiella	k__Bacteria.p__Proteobacteria.c__Alphaproteobacteria.o__Rhizobiales.f__Aurantimonadaceae.g__Aureimonas
k__Bacteria.p__Chloroflexi.c__Anaerolineae.o__Anaerolineales.f__Anaerolineaceae.g__Longilinea	k__Bacteria.p__Actinobacteria.c__Actinobacteria.o__Acidothermales.f__Acidothermaceae.g__Acidothermus
k__Bacteria.p__Proteobacteria.c__Gammaproteobacteria.o__Enterobacteriales.f__Enterobacteriaceae.g__Rahnella	k__Bacteria.p__Proteobacteria.c__Gammaproteobacteria.o__Chromatiales.f__Chromatiaceae.g__Thiohalocapsa
k__Bacteria.p__Bacteroidetes.c__Flavobacteriia.o__Flavobacteriales.f__Flavobacteriaceae.g__Ulvibacter	k__Bacteria.p__Proteobacteria.c__Gammaproteobacteria.o__Enterobacteriales.f__Enterobacteriaceae.g__Providencia
k__Bacteria.p__Proteobacteria.c__Betaproteobacteria.o__Burkholderiales.f__Comamonadaceae.g__Comamonas	k__Bacteria.p__Actinobacteria.c__Actinobacteria.o__Micrococcales.f__Dermatophilaceae.g__Austwickia
k__Bacteria.p__Chloroflexi.c__Dehalococcoidia.o__Dehalococcoidales.f__Dehalococcoidaceae.g__Dehalococcoides	k__Bacteria.p__Firmicutes.c__Bacilli.o__Bacillales.f__Bacillaceae.g__Caldibacillus
k__Bacteria.p__Firmicutes.c__Bacilli.o__Bacillales.f__Bacillaceae.g__Pontibacillus	k__Bacteria.p__Actinobacteria.c__Acidimicrobiia.o__Acidimicrobiales.f__Acidimicrobiaceae.g__Acidithrix
k__Bacteria.p__Proteobacteria.c__Gammaproteobacteria.o__Pasteurellales.f__Pasteurellaceae.g__Basfia	k__Archaea.p__Euryarchaeota.c__Methanomicrobia.o__Methanosarcinales.f__Methermicoccaceae.g__Methermicoccus
k__Bacteria.p__Cyanobacteria.o__Chroococcales.g__Candidatus_Atelocyanobacterium	k__Bacteria.p__Proteobacteria.c__Betaproteobacteria.o__Ferrovales.f__Ferrovaceae.g__Ferrovum
k__Bacteria.p__Proteobacteria.c__Gammaproteobacteria.o__Thiotrichales.f__Thiotrichaceae.g__Leucothrix	k__Bacteria.p__Firmicutes.c__Bacilli.o__Bacillales.f__Bacillaceae.g__Ornithinibacillus
k__Bacteria.p__Proteobacteria.c__Alphaproteobacteria.o__Rhizobiales.f__Methylobacteriaceae.g__Meganema	k__Bacteria.p__Firmicutes.c__Bacilli.o__Bacillales.f__Alicyclobacillaceae.g__Kyrpidia
k__Bacteria.p__Bacteroidetes.c__Chitinophagia.o__Chitinophagales.f__Saprospiraceae.g__Haliscomenobacter	k__Bacteria.p__Firmicutes.c__Erysipelotrichia.o__Erysipelotrichales.f__Erysipelotrichaceae.g__Coprobacillus
k__Bacteria.p__Rhodothermaeota.c__Balneolia.o__Balneolales.f__Balneolaceae.g__Balneola	k__Bacteria.p__Proteobacteria.c__Gammaproteobacteria.o__Pseudomonadales.f__Pseudomonadaceae.g__Azotobacter
k__Bacteria.p__Firmicutes.c__Bacilli.o__Bacillales.f__Paenibacillaceae.g__Paenibacillus	k__Bacteria.p__Cyanobacteria.o__Chroococcales.g__Synechocystis
k__Bacteria.p__Proteobacteria.c__Gammaproteobacteria.o__Chromatiales.f__Chromatiaceae.g__Lamprocystis	k__Archaea.p__Euryarchaeota.c__Methanomicrobia.o__Methanomicrobiales.f__Methanomicrobiaceae.g__Methanolacinia
k__Archaea.p__Euryarchaeota.c__Methanomicrobia.o__Methanosarcinales.f__Methanosaetaceae.g__Methanosaeta	k__Bacteria.p__Firmicutes.c__Clostridia.o__Clostridiales.f__Peptostreptococcaceae.g__Terrisporobacter
k__Bacteria.p__Proteobacteria.c__Gammaproteobacteria.o__Enterobacteriales.f__Enterobacteriaceae.g__Candidatus_Ishikawaella	k__Bacteria.p__Bacteroidetes.c__Chitinophagia.o__Chitinophagales.f__Chitinophagaceae.g__Terrimonas
k__Bacteria.p__Proteobacteria.c__Gammaproteobacteria.o__Chromatiales.f__Chromatiaceae.g__Thioflavicoccus	k__Bacteria.p__Aquificae.c__Aquificae.o__Aquificales.f__Hydrogenothermaceae.g__Persephonella
k__Bacteria.p__Proteobacteria.c__Deltaproteobacteria.o__Desulfobacterales.f__Desulfobacteraceae.g__Desulfobacter	k__Bacteria.p__Proteobacteria.c__Alphaproteobacteria.o__Rhizobiales.f__Beijerinckiaceae.g__Methylocapsa
k__Bacteria.p__Chloroflexi.c__Thermomicrobia.g__Thermorudis	k__Bacteria.p__Actinobacteria.c__Actinobacteria.o__Micrococcales.g__Tropheryma
k__Bacteria.p__Firmicutes.c__Clostridia.o__Clostridiales.f__Clostridiaceae.g__Butyricicoccus	k__Bacteria.p__Proteobacteria.c__Betaproteobacteria.o__Burkholderiales.f__Comamonadaceae.g__Hylemonella
k__Bacteria.p__Firmicutes.c__Clostridia.o__Clostridiales.f__Clostridiaceae.g__Alkaliphilus	k__Bacteria.p__Cyanobacteria.o__Nostocales.f__Rivulariaceae.g__Calothrix
k__Bacteria.p__Proteobacteria.c__Alphaproteobacteria.o__Rhodobacterales.f__Rhodobacteraceae.g__Marinovum	k__Bacteria.p__Actinobacteria.c__Actinobacteria.o__Bifidobacteriales.f__Bifidobacteriaceae.g__Parascardovia
k__Bacteria.p__Gemmatimonadetes.c__Gemmatimonadetes.o__Gemmatimonadales.f__Gemmatimonadaceae.g__Gemmatirosa	k__Archaea.p__Euryarchaeota.c__Methanobacteria.o__Methanobacteriales.f__Methanobacteriaceae.g__Methanothermobacter
k__Bacteria.p__Proteobacteria.c__Gammaproteobacteria.o__Xanthomonadales.f__Rhodanobacteraceae.g__Oleiagrimonas	k__Bacteria.p__Actinobacteria.c__Actinobacteria.o__Pseudonocardiales.f__Pseudonocardiaceae.g__Saccharothrix
k__Bacteria.p__Firmicutes.c__Erysipelotrichia.o__Erysipelotrichales.f__Erysipelotrichaceae.g__Solobacterium	k__Bacteria.p__Proteobacteria.c__Alphaproteobacteria.o__Rhizobiales.f__Rhodobiaceae.g__Tepidicaulis
k__Bacteria.p__Actinobacteria.c__Thermoleophilia.o__Solirubrobacterales.f__Solirubrobacteraceae.g__Solirubrobacter	k__Bacteria.p__Firmicutes.c__Bacilli.o__Bacillales.f__Planococcaceae.g__Planococcus
k__Bacteria.p__Synergistetes.c__Synergistia.o__Synergistales.f__Synergistaceae.g__Dethiosulfovibrio	k__Bacteria.p__Proteobacteria.c__Betaproteobacteria.o__Burkholderiales.f__Oxalobacteraceae.g__Collimonas
k__Bacteria.p__Proteobacteria.c__Alphaproteobacteria.o__Rhodobacterales.f__Rhodobacteraceae.g__Loktanella	k__Bacteria.p__Proteobacteria.c__Alphaproteobacteria.o__Rhodospirillales.f__Rhodospirillaceae.g__Novispirillum
k__Bacteria.p__Proteobacteria.c__Alphaproteobacteria.o__Caulobacterales.f__Caulobacteraceae.g__Asticcacaulis	k__Bacteria.p__Actinobacteria.c__Actinobacteria.o__Frankiales.f__Cryptosporangiaceae.g__Cryptosporangium
k__Bacteria.p__Firmicutes.c__Clostridia.o__Clostridiales.f__Peptostreptococcaceae.g__Paeniclostridium	k__Bacteria.p__Proteobacteria.c__Gammaproteobacteria.o__Xanthomonadales.f__Rhodanobacteraceae.g__Luteibacter
k__Bacteria.p__Firmicutes.c__Clostridia.o__Clostridiales.g__Flavonifractor	k__Bacteria.p__Proteobacteria.c__Alphaproteobacteria.o__Rhodobacterales.f__Rhodobacteraceae.g__Sedimentitalea
k__Bacteria.p__Actinobacteria.c__Actinobacteria.o__Micrococcales.f__Microbacteriaceae.g__Mycetocola	k__Bacteria.p__Planctomycetes.c__Planctomycetia.o__Planctomycetales.f__Planctomycetaceae.g__Gemmata
k__Bacteria.p__Proteobacteria.c__Betaproteobacteria.o__Burkholderiales.g__Rubrivivax	k__Bacteria.p__Bacteroidetes.c__Flavobacteriia.o__Flavobacteriales.f__Flavobacteriaceae.g__Mesoflavibacter
k__Bacteria.p__Firmicutes.c__Bacilli.o__Lactobacillales.f__Enterococcaceae.g__Melissococcus	k__Bacteria.p__Firmicutes.c__Clostridia.o__Clostridiales.f__Clostridiaceae.g__Candidatus_Arthromitus
k__Bacteria.p__Proteobacteria.c__Deltaproteobacteria.o__Myxococcales.f__Myxococcaceae.g__Corallococcus	k__Bacteria.p__Acidobacteria.c__Acidobacteriia.o__Acidobacteriales.f__Acidobacteriaceae.g__Silvibacterium
k__Bacteria.p__Firmicutes.c__Clostridia.o__Thermoanaerobacterales.f__Thermoanaerobacteraceae.g__Caldanaerobius	k__Bacteria.p__Actinobacteria.c__Actinobacteria.o__Pseudonocardiales.f__Pseudonocardiaceae.g__Actinomycetospora
k__Bacteria.p__Actinobacteria.c__Coriobacteriia.o__Eggerthellales.f__Eggerthellaceae.g__Gordonibacter	k__Bacteria.p__Cyanobacteria.o__Stigonematales.g__Fischerella
k__Bacteria.p__Proteobacteria.c__Deltaproteobacteria.o__Desulfarculales.f__Desulfarculaceae.g__Desulfarculus	k__Bacteria.p__Proteobacteria.c__Gammaproteobacteria.o__Oceanospirillales.f__Saccharospirillaceae.g__Saccharospirillum
k__Bacteria.p__Firmicutes.c__Clostridia.o__Thermoanaerobacterales.f__Thermoanaerobacteraceae.g__Thermoanaerobacter	k__Bacteria.p__Fusobacteria.c__Fusobacteriia.o__Fusobacteriales.f__Fusobacteriaceae.g__Fusobacterium
k__Bacteria.p__Firmicutes.c__Clostridia.o__Clostridiales.f__Clostridiaceae.g__Anaerosalibacter	k__Bacteria.p__Cyanobacteria.o__Nostocales.f__Nostocaceae.g__Cylindrospermum
k__Bacteria.p__Proteobacteria.c__Gammaproteobacteria.o__Pasteurellales.f__Pasteurellaceae.g__Haemophilus	k__Archaea.p__Euryarchaeota.c__Halobacteria.o__Natrialbales.f__Natrialbaceae.g__Salinarchaeum
k__Bacteria.p__Bacteroidetes.c__Bacteroidia.o__Bacteroidales.f__Porphyromonadaceae.g__Proteiniphilum	k__Bacteria.p__Spirochaetes.c__Spirochaetia.o__Spirochaetales.f__Spirochaetaceae.g__Sphaerochaeta
k__Bacteria.p__Actinobacteria.c__Actinobacteria.o__Micrococcales.f__Cellulomonadaceae.g__Oerskovia	k__Bacteria.p__Firmicutes.c__Clostridia.o__Clostridiales.f__Lachnospiraceae.g__Lachnoclostridium
k__Bacteria.p__Proteobacteria.c__Gammaproteobacteria.o__Oceanospirillales.f__Oceanospirillaceae.g__Thalassolituus	k__Bacteria.p__Bacteroidetes.c__Flavobacteriia.o__Flavobacteriales.f__Flavobacteriaceae.g__Polaribacter
k__Bacteria.p__Deferribacteres.c__Deferribacteres.o__Deferribacterales.f__Deferribacteraceae.g__Mucispirillum	k__Bacteria.p__Firmicutes.c__Clostridia.o__Clostridiales.f__Clostridiaceae.g__Alkaliphilus
k__Bacteria.p__Firmicutes.c__Erysipelotrichia.o__Erysipelotrichales.f__Erysipelotrichaceae.g__Allobaculum	k__Bacteria.p__Firmicutes.c__Clostridia.o__Clostridiales.f__Peptostreptococcaceae.g__Clostridioides
k__Bacteria.p__Proteobacteria.c__Betaproteobacteria.o__Burkholderiales.f__Alcaligenaceae.g__Taylorella	k__Bacteria.p__Proteobacteria.c__Betaproteobacteria.o__Burkholderiales.f__Burkholderiaceae.g__Cupriavidus
k__Bacteria.p__Actinobacteria.c__Coriobacteriia.o__Coriobacteriales.f__Coriobacteriaceae.g__Coriobacterium	k__Bacteria.p__Verrucomicrobia.c__Spartobacteria.o__Chthoniobacterales.f__Chthoniobacteraceae.g__Chthoniobacter
k__Archaea.p__Euryarchaeota.c__Methanomicrobia.o__Methanosarcinales.f__Methanosarcinaceae.g__Methanolobus	k__Bacteria.p__Proteobacteria.c__Alphaproteobacteria.o__Rhodobacterales.f__Rhodobacteraceae.g__Ruegeria
k__Bacteria.p__Proteobacteria.c__Gammaproteobacteria.o__Oceanospirillales.f__Oleiphilaceae.g__Oleiphilus	k__Bacteria.p__Proteobacteria.c__Gammaproteobacteria.o__Chromatiales.f__Chromatiaceae.g__Thiocystis
k__Bacteria.p__Proteobacteria.c__Gammaproteobacteria.o__Oceanospirillales.f__Oceanospirillaceae.g__Amphritea	k__Bacteria.p__Cyanobacteria.o__Oscillatoriales.g__Trichodesmium
k__Bacteria.p__Proteobacteria.c__Betaproteobacteria.o__Burkholderiales.f__Comamonadaceae.g__Delftia	k__Bacteria.p__Proteobacteria.c__Gammaproteobacteria.o__Nevskiales.f__Sinobacteraceae.g__Steroidobacter
k__Bacteria.p__Proteobacteria.c__Gammaproteobacteria.o__Cellvibrionales.f__Cellvibrionaceae.g__Marinagarivorans	k__Bacteria.p__Proteobacteria.c__Gammaproteobacteria.o__Oceanospirillales.f__Oleiphilaceae.g__Oleiphilus
k__Bacteria.p__Acidobacteria.g__Thermoanaerobaculum	k__Bacteria.p__Tenericutes.c__Mollicutes.o__Mycoplasmatales.f__Mycoplasmataceae.g__Ureaplasma
k__Bacteria.p__Proteobacteria.c__Betaproteobacteria.o__Burkholderiales.f__Alcaligenaceae.g__Alcaligenes	k__Bacteria.p__Proteobacteria.c__Gammaproteobacteria.o__Xanthomonadales.f__Xanthomonadaceae.g__Pseudoxanthomonas
k__Bacteria.p__Firmicutes.c__Erysipelotrichia.o__Erysipelotrichales.f__Erysipelotrichaceae.g__Bulleidia	k__Bacteria.p__Proteobacteria.c__Betaproteobacteria.o__Gallionellales.f__Gallionellaceae.g__Sideroxydans
k__Bacteria.p__Synergistetes.c__Synergistia.o__Synergistales.f__Synergistaceae.g__Aminobacterium	k__Bacteria.p__Proteobacteria.c__Alphaproteobacteria.o__Rhodospirillales.f__Acetobacteraceae.g__Belnapia
k__Archaea.p__Euryarchaeota.c__Halobacteria.o__Haloferacales.f__Haloferacaceae.g__Haloplanus	k__Bacteria.p__Bacteroidetes.c__Cytophagia.o__Cytophagales.f__Cyclobacteriaceae.g__Cyclobacterium
k__Bacteria.p__Firmicutes.c__Erysipelotrichia.o__Erysipelotrichales.f__Erysipelotrichaceae.g__Faecalibaculum	k__Bacteria.p__Proteobacteria.c__Alphaproteobacteria.o__Rhizobiales.f__Phyllobacteriaceae.g__Aminobacter
k__Bacteria.p__Proteobacteria.c__Gammaproteobacteria.o__Vibrionales.f__Vibrionaceae.g__Aliivibrio	k__Archaea.p__Crenarchaeota.c__Thermoprotei.o__Desulfurococcales.f__Pyrodictiaceae.g__Pyrolobus
k__Bacteria.p__Actinobacteria.c__Actinobacteria.o__Micrococcales.f__Demequinaceae.g__Demequina	k__Bacteria.p__Bacteroidetes.c__Flavobacteriia.o__Flavobacteriales.f__Flavobacteriaceae.g__Aquimarina
k__Bacteria.p__Bacteroidetes.c__Flavobacteriia.o__Flavobacteriales.f__Flavobacteriaceae.g__Flagellimonas	k__Bacteria.p__Firmicutes.c__Clostridia.o__Clostridiales.f__Lachnospiraceae.g__Lachnoanaerobaculum
k__Bacteria.p__Actinobacteria.c__Actinobacteria.o__Pseudonocardiales.f__Pseudonocardiaceae.g__Amycolatopsis	k__Bacteria.p__Proteobacteria.c__Gammaproteobacteria.o__Orbales.f__Orbaceae.g__Candidatus_Schmidhempelia
k__Bacteria.p__Proteobacteria.c__Alphaproteobacteria.o__Rhodobacterales.f__Rhodobacteraceae.g__Paracoccus	k__Bacteria.p__Proteobacteria.c__Gammaproteobacteria.o__Enterobacteriales.f__Enterobacteriaceae.g__Erwinia
k__Bacteria.p__Bacteroidetes.c__Sphingobacteriia.o__Sphingobacteriales.f__Sphingobacteriaceae.g__Solitalea	k__Bacteria.p__Actinobacteria.c__Actinobacteria.o__Micrococcales.f__Micrococcaceae.g__Pseudoglutamicibacter
k__Bacteria.p__Fusobacteria.c__Fusobacteriia.o__Fusobacteriales.f__Fusobacteriaceae.g__Psychrilyobacter	k__Bacteria.p__Proteobacteria.c__Gammaproteobacteria.o__Chromatiales.f__Chromatiaceae.g__Thiorhodococcus
k__Archaea.p__Euryarchaeota.c__Thermoplasmata.o__Thermoplasmatales.f__Ferroplasmaceae.g__Ferroplasma	k__Bacteria.p__Actinobacteria.c__Actinobacteria.o__Corynebacteriales.f__Williamsiaceae.g__Williamsia
k__Bacteria.p__Proteobacteria.c__Alphaproteobacteria.o__Rickettsiales.f__Rickettsiaceae.g__Orientia	k__Bacteria.p__Firmicutes.c__Clostridia.o__Halanaerobiales.f__Halanaerobiaceae.g__Halothermothrix
k__Bacteria.p__Proteobacteria.c__Gammaproteobacteria.o__Vibrionales.f__Vibrionaceae.g__Enterovibrio	k__Bacteria.p__Firmicutes.c__Bacilli.o__Bacillales.f__Paenibacillaceae.g__Cohnella
k__Bacteria.p__Proteobacteria.c__Gammaproteobacteria.o__Enterobacteriales.f__Enterobacteriaceae.g__Franconibacter	k__Bacteria.p__Proteobacteria.c__Alphaproteobacteria.o__Rhizobiales.f__Xanthobacteraceae.g__Starkeya
k__Bacteria.p__Proteobacteria.c__Gammaproteobacteria.o__Methylococcales.f__Methylococcaceae.g__Methylocaldum	k__Bacteria.p__Proteobacteria.c__Deltaproteobacteria.g__Deferrisoma
k__Bacteria.p__Proteobacteria.c__Gammaproteobacteria.o__Cellvibrionales.f__Cellvibrionaceae.g__Gilvimarinus	k__Archaea.p__Euryarchaeota.c__Halobacteria.o__Halobacteriales.f__Halobacteriaceae.g__Halanaeroarchaeum
k__Bacteria.p__Proteobacteria.c__Gammaproteobacteria.o__Chromatiales.f__Chromatiaceae.g__Thiocystis	k__Bacteria.p__Proteobacteria.c__Gammaproteobacteria.o__Alteromonadales.f__Colwelliaceae.g__Thalassomonas
k__Bacteria.p__Firmicutes.c__Bacilli.o__Bacillales.f__Bacillaceae.g__Lentibacillus	k__Bacteria.p__Actinobacteria.c__Actinobacteria.o__Pseudonocardiales.f__Pseudonocardiaceae.g__Lentzea
k__Bacteria.p__Cyanobacteria.o__Pleurocapsales.g__Pleurocapsa	k__Bacteria.p__Proteobacteria.c__Gammaproteobacteria.o__Xanthomonadales.f__Xanthomonadaceae.g__Silanimonas
k__Bacteria.p__Proteobacteria.c__Gammaproteobacteria.o__Alteromonadales.f__Pseudoalteromonadaceae.g__Algicola	k__Archaea.p__Euryarchaeota.c__Halobacteria.o__Haloferacales.f__Haloferacaceae.g__Halogranum
k__Archaea.p__Euryarchaeota.c__Methanomicrobia.o__Methanomicrobiales.f__Methanoregulaceae.g__Methanosphaerula	k__Bacteria.p__Bacteroidetes.c__Cytophagia.o__Cytophagales.f__Cytophagaceae.g__Runella
k__Bacteria.p__Actinobacteria.c__Actinobacteria.o__Corynebacteriales.g__Tomitella	k__Bacteria.p__Actinobacteria.c__Actinobacteria.o__Micrococcales.f__Microbacteriaceae.g__Frigoribacterium
k__Bacteria.p__Cyanobacteria.o__Oscillatoriales.g__Planktothricoides	k__Bacteria.p__Proteobacteria.c__Betaproteobacteria.o__Burkholderiales.f__Comamonadaceae.g__Alicycliphilus
k__Bacteria.p__Proteobacteria.c__Betaproteobacteria.o__Rhodocyclales.f__Rhodocyclaceae.g__Dechloromonas	k__Bacteria.p__Firmicutes.c__Bacilli.o__Bacillales.f__Paenibacillaceae.g__Aneurinibacillus
k__Bacteria.p__Verrucomicrobia.c__Spartobacteria.o__Chthoniobacterales.f__Chthoniobacteraceae.g__Chthoniobacter	k__Archaea.p__Euryarchaeota.c__Halobacteria.o__Halobacteriales.f__Halobacteriaceae.g__Halosimplex
k__Bacteria.p__Bacteroidetes.c__Cytophagia.o__Cytophagales.f__Cyclobacteriaceae.g__Mariniradius	k__Bacteria.p__Proteobacteria.c__Gammaproteobacteria.o__Enterobacteriales.f__Enterobacteriaceae.g__Leminorella
k__Bacteria.p__Actinobacteria.c__Actinobacteria.o__Micrococcales.f__Beutenbergiaceae.g__Beutenbergia	k__Bacteria.p__Firmicutes.c__Clostridia.o__Clostridiales.f__Eubacteriaceae.g__Eubacterium
k__Archaea.p__Crenarchaeota.c__Thermoprotei.o__Thermoproteales.f__Thermoproteaceae.g__Vulcanisaeta	k__Bacteria.p__Proteobacteria.c__Betaproteobacteria.o__Burkholderiales.f__Alcaligenaceae.g__Pusillimonas
k__Bacteria.p__Proteobacteria.c__Deltaproteobacteria.o__Desulfovibrionales.f__Desulfomicrobiaceae.g__Desulfomicrobium	k__Archaea.p__Euryarchaeota.c__Halobacteria.o__Natrialbales.f__Natrialbaceae.g__Halostagnicola
k__Bacteria.p__Deinococcus.Thermus.c__Deinococci.o__Thermales.f__Thermaceae.g__Marinithermus	k__Bacteria.p__Proteobacteria.c__Alphaproteobacteria.o__Rhodobacterales.f__Rhodobacteraceae.g__Stappia
k__Bacteria.p__Firmicutes.c__Clostridia.o__Thermoanaerobacterales.f__Thermoanaerobacterales_Family_IV._Incertae_Sedis.g__Mahella	k__Bacteria.p__Proteobacteria.c__Gammaproteobacteria.o__Thiotrichales.f__Thiotrichaceae.g__Thiothrix
k__Bacteria.p__Proteobacteria.c__Deltaproteobacteria.o__Desulfarculales.f__Desulfarculaceae.g__Dethiosulfatarculus	k__Bacteria.p__Proteobacteria.c__Gammaproteobacteria.o__Vibrionales.f__Vibrionaceae.g__Salinivibrio
k__Bacteria.p__Proteobacteria.c__Gammaproteobacteria.o__Cellvibrionales.f__Spongiibacteraceae.g__Zhongshania	k__Bacteria.p__Acidobacteria.c__Acidobacteriia.o__Acidobacteriales.f__Acidobacteriaceae.g__Edaphobacter
k__Bacteria.p__Actinobacteria.c__Actinobacteria.o__Micromonosporales.f__Micromonosporaceae.g__Catenuloplanes	k__Bacteria.p__Bacteroidetes.c__Bacteroidia.o__Bacteroidales.f__Marinilabiliaceae.g__Alkaliflexus
k__Bacteria.p__Proteobacteria.c__Gammaproteobacteria.o__Pasteurellales.f__Pasteurellaceae.g__Necropsobacter	k__Bacteria.p__Bacteroidetes.c__Flavobacteriia.o__Flavobacteriales.f__Flavobacteriaceae.g__Sediminibacter
k__Bacteria.p__Cyanobacteria.o__Stigonematales.g__Hapalosiphon	k__Bacteria.p__Proteobacteria.c__Alphaproteobacteria.o__Rhizobiales.f__Methylocystaceae.g__Methylopila
k__Bacteria.p__Firmicutes.c__Bacilli.o__Lactobacillales.f__Leuconostocaceae.g__Oenococcus	k__Bacteria.p__Actinobacteria.c__Actinobacteria.o__Bifidobacteriales.f__Bifidobacteriaceae.g__Bifidobacterium
k__Bacteria.p__Proteobacteria.c__Alphaproteobacteria.o__Rhodospirillales.f__Rhodospirillaceae.g__Phaeospirillum	k__Bacteria.p__Proteobacteria.c__Betaproteobacteria.o__Gallionellales.f__Gallionellaceae.g__Gallionella
k__Bacteria.p__Proteobacteria.c__Alphaproteobacteria.g__Polymorphum	k__Bacteria.p__Proteobacteria.c__Gammaproteobacteria.o__Enterobacteriales.f__Enterobacteriaceae.g__Candidatus_Blochmannia
k__Bacteria.p__Firmicutes.c__Clostridia.o__Clostridiales.f__Lachnospiraceae.g__Marvinbryantia	k__Bacteria.p__Proteobacteria.c__Betaproteobacteria.o__Methylophilales.f__Methylophilaceae.g__Methylophilus
k__Archaea.p__Euryarchaeota.c__Halobacteria.o__Halobacteriales.f__Halobacteriaceae.g__Halococcus	k__Bacteria.p__Proteobacteria.c__Alphaproteobacteria.o__Rhizobiales.f__Bradyrhizobiaceae.g__Nitrobacter
k__Bacteria.p__Bacteroidetes.o__Bacteroidetes_Order_II._Incertae_sedis.f__Rhodothermaceae.g__Salisaeta	k__Bacteria.p__Actinobacteria.c__Actinobacteria.o__Micrococcales.f__Dermacoccaceae.g__Dermacoccus
k__Bacteria.p__Proteobacteria.c__Betaproteobacteria.o__Burkholderiales.f__Burkholderiaceae.g__Lautropia	k__Archaea.p__Euryarchaeota.c__Methanomicrobia.o__Methanomicrobiales.f__Methanoregulaceae.g__Methanolinea
k__Bacteria.p__Proteobacteria.c__Gammaproteobacteria.o__Oceanospirillales.f__Oceanospirillaceae.g__Bermanella	k__Bacteria.p__Bacteroidetes.c__Flavobacteriia.o__Flavobacteriales.f__Flavobacteriaceae.g__Winogradskyella
k__Bacteria.p__Proteobacteria.c__Alphaproteobacteria.o__Rhizobiales.f__Methylocystaceae.g__Pleomorphomonas	k__Bacteria.p__Proteobacteria.c__Epsilonproteobacteria.o__Campylobacterales.g__Nitratifractor
k__Bacteria.p__Proteobacteria.c__Alphaproteobacteria.o__Rhodobacterales.f__Rhodobacteraceae.g__Pseudovibrio	k__Bacteria.p__Proteobacteria.c__Deltaproteobacteria.o__Desulfobacterales.f__Desulfobacteraceae.g__Desulfosarcina
k__Bacteria.p__Proteobacteria.c__Alphaproteobacteria.o__Rhizobiales.f__Brucellaceae.g__Brucella	k__Bacteria.p__Proteobacteria.c__Betaproteobacteria.o__Burkholderiales.f__Alcaligenaceae.g__Taylorella
k__Bacteria.p__Nitrospirae.c__Nitrospira.o__Nitrospirales.f__Nitrospiraceae.g__Thermodesulfovibrio	k__Bacteria.p__Firmicutes.c__Clostridia.o__Clostridiales.f__Lachnospiraceae.g__Shuttleworthia
k__Bacteria.p__Verrucomicrobia.c__Opitutae.o__Opitutales.f__Opitutaceae.g__Cephaloticoccus	k__Bacteria.p__Cyanobacteria.o__Oscillatoriales.g__Leptolyngbya
k__Bacteria.p__Proteobacteria.c__Gammaproteobacteria.o__Pseudomonadales.f__Moraxellaceae.g__Alkanindiges	k__Bacteria.p__Firmicutes.c__Bacilli.o__Lactobacillales.f__Enterococcaceae.g__Vagococcus
k__Bacteria.p__Proteobacteria.c__Deltaproteobacteria.o__Desulfovibrionales.f__Desulfovibrionaceae.g__Desulfocurvus	k__Bacteria.p__Firmicutes.c__Bacilli.o__Bacillales.f__Bacillaceae.g__Halobacillus
k__Bacteria.p__Firmicutes.c__Bacilli.o__Lactobacillales.f__Streptococcaceae.g__Streptococcus	k__Bacteria.p__Bacteroidetes.c__Flavobacteriia.o__Flavobacteriales.f__Crocinitomicaceae.g__Fluviicola
k__Bacteria.p__Actinobacteria.c__Acidimicrobiia.o__Acidimicrobiales.f__Acidimicrobiaceae.g__Acidimicrobium	k__Bacteria.p__Firmicutes.c__Tissierellia.o__Tissierellales.f__Peptoniphilaceae.g__Parvimonas
k__Bacteria.p__Actinobacteria.c__Actinobacteria.o__Frankiales.f__Sporichthyaceae.g__Sporichthya	k__Bacteria.p__Proteobacteria.c__Alphaproteobacteria.o__Rhodobacterales.f__Rhodobacteraceae.g__Oceanibulbus
k__Bacteria.p__Firmicutes.c__Bacilli.o__Bacillales.f__Thermoactinomycetaceae.g__Thermoactinomyces	k__Bacteria.p__Bacteroidetes.c__Flavobacteriia.o__Flavobacteriales.f__Flavobacteriaceae.g__Gillisia
k__Bacteria.p__Bacteroidetes.c__Cytophagia.o__Cytophagales.f__Cytophagaceae.g__Rudanella	k__Bacteria.p__Actinobacteria.c__Actinobacteria.o__Bifidobacteriales.f__Bifidobacteriaceae.g__Alloscardovia
k__Bacteria.p__Aquificae.c__Aquificae.o__Desulfurobacteriales.f__Desulfurobacteriaceae.g__Desulfurobacterium	k__Bacteria.p__Bacteroidetes.c__Chitinophagia.o__Chitinophagales.f__Chitinophagaceae.g__Flavihumibacter
k__Bacteria.p__Bacteroidetes.c__Flavobacteriia.o__Flavobacteriales.f__Flavobacteriaceae.g__Jejuia	k__Bacteria.p__Proteobacteria.c__Alphaproteobacteria.o__Rhizobiales.f__Aurantimonadaceae.g__Fulvimarina
k__Bacteria.p__Firmicutes.c__Bacilli.o__Lactobacillales.f__Carnobacteriaceae.g__Alkalibacterium	k__Bacteria.p__Bacteroidetes.c__Flavobacteriia.o__Flavobacteriales.f__Flavobacteriaceae.g__Gelidibacter
k__Bacteria.p__Firmicutes.c__Clostridia.o__Thermoanaerobacterales.f__Thermoanaerobacterales_Family_III._Incertae_Sedis.g__Thermosediminibacter	k__Bacteria.p__Elusimicrobia.c__Endomicrobia.o__Endomicrobiales.f__Endomicrobiaceae.g__Endomicrobium
k__Bacteria.p__Cyanobacteria.o__Oscillatoriales.g__Microcoleus	k__Bacteria.p__Proteobacteria.c__Gammaproteobacteria.o__Enterobacteriales.f__Enterobacteriaceae.g__Candidatus_Moranella
k__Bacteria.p__Proteobacteria.c__Alphaproteobacteria.o__Rhizobiales.f__Rhodobiaceae.g__Afifella	k__Bacteria.p__Bacteroidetes.c__Flavobacteriia.o__Flavobacteriales.f__Flavobacteriaceae.g__Arenibacter
k__Bacteria.p__Proteobacteria.c__Betaproteobacteria.o__Burkholderiales.f__Alcaligenaceae.g__Pelistega	k__Bacteria.p__Proteobacteria.c__Gammaproteobacteria.o__Pseudomonadales.f__Moraxellaceae.g__Enhydrobacter
k__Bacteria.p__Proteobacteria.c__Betaproteobacteria.o__Burkholderiales.f__Oxalobacteraceae.g__Janthinobacterium	k__Bacteria.p__Proteobacteria.c__Alphaproteobacteria.o__Rhodobacterales.f__Rhodobacteraceae.g__Litoreibacter
k__Bacteria.p__Chloroflexi.c__Anaerolineae.o__Anaerolineales.f__Anaerolineaceae.g__Levilinea	k__Bacteria.p__Acidobacteria.c__Blastocatellia.g__Chloracidobacterium
k__Bacteria.p__Firmicutes.c__Bacilli.o__Bacillales.f__Planococcaceae.g__Rummeliibacillus	k__Bacteria.p__Proteobacteria.c__Gammaproteobacteria.o__Pasteurellales.f__Pasteurellaceae.g__Avibacterium
k__Bacteria.p__Nitrospinae.c__Nitrospinia.o__Nitrospinales.f__Nitrospinaceae.g__Nitrospina	k__Bacteria.p__Bacteroidetes.c__Chitinophagia.o__Chitinophagales.f__Chitinophagaceae.g__Chitinophaga
k__Bacteria.p__Cyanobacteria.o__Chroococcales.g__Gloeocapsa	k__Bacteria.p__Proteobacteria.c__Betaproteobacteria.o__Rhodocyclales.f__Rhodocyclaceae.g__Methyloversatilis
k__Bacteria.p__Firmicutes.c__Bacilli.o__Lactobacillales.f__Enterococcaceae.g__Catellicoccus	k__Bacteria.p__Proteobacteria.c__Gammaproteobacteria.o__Pasteurellales.f__Pasteurellaceae.g__Pasteurella
k__Bacteria.p__Actinobacteria.c__Actinobacteria.o__Micrococcales.f__Cellulomonadaceae.g__Cellulomonas	k__Bacteria.p__Bacteroidetes.c__Cytophagia.o__Cytophagales.f__Cytophagaceae.g__Emticicia
k__Bacteria.p__Actinobacteria.c__Actinobacteria.o__Micrococcales.f__Promicromonosporaceae.g__Xylanimonas	k__Bacteria.p__Firmicutes.c__Erysipelotrichia.o__Erysipelotrichales.f__Erysipelotrichaceae.g__Dielma
k__Bacteria.p__Cyanobacteria.o__Chroococcales.g__Cyanobium	k__Bacteria.p__Synergistetes.c__Synergistia.o__Synergistales.f__Synergistaceae.g__Dethiosulfovibrio
k__Archaea.p__Euryarchaeota.c__Methanobacteria.o__Methanobacteriales.f__Methanothermaceae.g__Methanothermus	k__Bacteria.p__Cyanobacteria.o__Chroococcales.g__Chamaesiphon
k__Bacteria.p__Proteobacteria.c__Alphaproteobacteria.o__Parvularculales.f__Parvularculaceae.g__Parvularcula	k__Bacteria.p__Proteobacteria.c__Alphaproteobacteria.o__Rhodobacterales.f__Rhodobacteraceae.g__Pseudovibrio
k__Bacteria.p__Actinobacteria.c__Actinobacteria.o__Actinomycetales.f__Actinomycetaceae.g__Actinotignum	k__Bacteria.p__Fusobacteria.c__Fusobacteriia.o__Fusobacteriales.f__Leptotrichiaceae.g__Streptobacillus
k__Bacteria.p__Bacteroidetes.c__Bacteroidia.o__Bacteroidales.f__Marinifilaceae.g__Marinifilum	k__Bacteria.p__Firmicutes.c__Clostridia.o__Halanaerobiales.f__Halobacteroidaceae.g__Halonatronum
k__Bacteria.p__Proteobacteria.c__Betaproteobacteria.o__Burkholderiales.f__Comamonadaceae.g__Rhodoferax	k__Bacteria.p__Firmicutes.c__Bacilli.o__Bacillales.f__Thermoactinomycetaceae.g__Risungbinella
k__Bacteria.p__Actinobacteria.c__Actinobacteria.o__Micromonosporales.f__Micromonosporaceae.g__Catelliglobosispora	k__Bacteria.p__Thermotogae.c__Thermotogae.o__Petrotogales.g__Defluviitoga
k__Bacteria.p__Proteobacteria.c__Gammaproteobacteria.o__Chromatiales.f__Chromatiaceae.g__Nitrosococcus	k__Bacteria.p__Proteobacteria.c__Gammaproteobacteria.o__Cellvibrionales.f__Halieaceae.g__Luminiphilus
k__Bacteria.p__Proteobacteria.c__Alphaproteobacteria.o__Rhodobacterales.f__Rhodobacteraceae.g__Salipiger	k__Archaea.p__Crenarchaeota.c__Thermoprotei.o__Thermoproteales.f__Thermoproteaceae.g__Thermoproteus
k__Bacteria.p__Proteobacteria.c__Alphaproteobacteria.o__Rhizobiales.f__Beijerinckiaceae.g__Methyloferula	k__Bacteria.p__Actinobacteria.c__Actinobacteria.o__Propionibacteriales.f__Propionibacteriaceae.g__Propionibacterium
k__Bacteria.p__Proteobacteria.c__Betaproteobacteria.o__Neisseriales.f__Chromobacteriaceae.g__Gulbenkiania	k__Bacteria.p__Bacteroidetes.c__Cytophagia.o__Cytophagales.f__Flammeovirgaceae.g__Marivirga
k__Bacteria.p__Firmicutes.c__Clostridia.o__Clostridiales.f__Peptostreptococcaceae.g__Terrisporobacter	k__Bacteria.p__Proteobacteria.c__Alphaproteobacteria.o__Rhodospirillales.f__Acetobacteraceae.g__Gluconacetobacter
k__Bacteria.p__Proteobacteria.c__Alphaproteobacteria.o__Rhodobacterales.f__Rhodobacteraceae.g__Octadecabacter	k__Bacteria.p__Actinobacteria.c__Thermoleophilia.o__Solirubrobacterales.f__Patulibacteraceae.g__Patulibacter
k__Bacteria.p__Proteobacteria.c__Deltaproteobacteria.o__Desulfobacterales.f__Desulfobulbaceae.g__Desulfurivibrio	k__Bacteria.p__Proteobacteria.c__Alphaproteobacteria.o__Rhodospirillales.f__Acetobacteraceae.g__Rubritepida
k__Bacteria.p__Proteobacteria.c__Gammaproteobacteria.o__Pseudomonadales.f__Moraxellaceae.g__Psychrobacter	k__Bacteria.p__Proteobacteria.c__Gammaproteobacteria.o__Aeromonadales.f__Aeromonadaceae.g__Aeromonas
k__Bacteria.p__Proteobacteria.c__Alphaproteobacteria.o__Rhodobacterales.f__Rhodobacteraceae.g__Jannaschia	k__Bacteria.p__Cyanobacteria.o__Stigonematales.g__Hapalosiphon
k__Archaea.p__Euryarchaeota.c__Archaeoglobi.o__Archaeoglobales.f__Archaeoglobaceae.g__Archaeoglobus	k__Bacteria.p__Firmicutes.c__Clostridia.o__Clostridiales.f__Peptococcaceae.g__Syntrophobotulus
k__Bacteria.p__Bacteroidetes.c__Flavobacteriia.o__Flavobacteriales.f__Flavobacteriaceae.g__Siansivirga	k__Bacteria.p__Proteobacteria.c__Gammaproteobacteria.o__Pasteurellales.f__Pasteurellaceae.g__Muribacter
k__Bacteria.p__Firmicutes.c__Clostridia.o__Halanaerobiales.f__Halanaerobiaceae.g__Halothermothrix	k__Bacteria.p__Actinobacteria.c__Actinobacteria.o__Micrococcales.f__Demequinaceae.g__Demequina
k__Bacteria.p__Proteobacteria.c__Alphaproteobacteria.o__Rhodospirillales.f__Acetobacteraceae.g__Gluconacetobacter	k__Bacteria.p__Chlorobi.c__Chlorobia.o__Chlorobiales.f__Chlorobiaceae.g__Chloroherpeton
k__Bacteria.p__Actinobacteria.c__Actinobacteria.o__Micrococcales.f__Intrasporangiaceae.g__Phycicoccus	k__Bacteria.p__Actinobacteria.c__Actinobacteria.o__Corynebacteriales.f__Mycobacteriaceae.g__Mycobacterium
k__Bacteria.p__Proteobacteria.c__Deltaproteobacteria.o__Desulfobacterales.f__Desulfobacteraceae.g__Desulfatibacillum	k__Bacteria.p__Candidatus_Cloacimonetes.g__Candidatus_Cloacimonas
k__Bacteria.p__Firmicutes.c__Bacilli.o__Lactobacillales.f__Carnobacteriaceae.g__Dolosigranulum	k__Bacteria.p__Verrucomicrobia.c__Verrucomicrobiae.o__Verrucomicrobiales.f__Verrucomicrobiaceae.g__Haloferula
k__Archaea.p__Euryarchaeota.c__Halobacteria.o__Halobacteriales.f__Halobacteriaceae.g__Halarchaeum	k__Bacteria.p__Proteobacteria.c__Gammaproteobacteria.o__Thiotrichales.f__Piscirickettsiaceae.g__Hydrogenovibrio
k__Bacteria.p__Proteobacteria.c__Alphaproteobacteria.o__Rickettsiales.f__Anaplasmataceae.g__Ehrlichia	k__Archaea.p__Euryarchaeota.c__Archaeoglobi.o__Archaeoglobales.f__Archaeoglobaceae.g__Geoglobus
k__Bacteria.p__Firmicutes.c__Clostridia.o__Clostridiales.f__Caldicoprobacteraceae.g__Caldicoprobacter	k__Archaea.p__Euryarchaeota.c__Thermoplasmata.o__Thermoplasmatales.f__Thermoplasmataceae.g__Thermoplasma
k__Bacteria.p__Firmicutes.c__Bacilli.o__Bacillales.f__Bacillaceae.g__Salinibacillus	k__Bacteria.p__Firmicutes.c__Clostridia.o__Clostridiales.f__Lachnospiraceae.g__Sellimonas
k__Bacteria.p__Proteobacteria.c__Deltaproteobacteria.o__Desulfurellales.f__Desulfurellaceae.g__Desulfurella	k__Archaea.p__Crenarchaeota.c__Thermoprotei.o__Thermoproteales.f__Thermoproteaceae.g__Caldivirga
k__Bacteria.p__Firmicutes.c__Clostridia.o__Clostridiales.f__Lachnospiraceae.g__Pseudobutyrivibrio	k__Archaea.p__Thaumarchaeota.g__Candidatus_Nitrosotenuis
k__Bacteria.p__Bacteroidetes.c__Flavobacteriia.o__Flavobacteriales.f__Flavobacteriaceae.g__Capnocytophaga	k__Viruses.f__Circoviridae.g__Circovirus
k__Bacteria.p__Actinobacteria.c__Actinobacteria.o__Micrococcales.f__Microbacteriaceae.g__Humibacter	k__Viruses.o__Picornavirales.f__Secoviridae.g__Waikavirus
k__Bacteria.p__Proteobacteria.c__Gammaproteobacteria.o__Enterobacteriales.f__Enterobacteriaceae.g__Escherichia	k__Viruses.o__Picornavirales.f__Picornaviridae.g__Tremovirus
k__Bacteria.p__Proteobacteria.c__Alphaproteobacteria.o__Rhizobiales.f__Aurantimonadaceae.g__Martelella	k__Viruses.o__Caudovirales.f__Siphoviridae.g__Tunalikevirus
k__Bacteria.p__Firmicutes.c__Bacilli.o__Bacillales.f__Bacillaceae.g__Lysinibacillus	k__Viruses.f__Papillomaviridae.g__Taupapillomavirus
k__Bacteria.p__Proteobacteria.c__Gammaproteobacteria.o__Cellvibrionales.f__Spongiibacteraceae.g__Spongiibacter	k__Viruses.f__Poxviridae.g__Parapoxvirus
k__Bacteria.p__Proteobacteria.c__Betaproteobacteria.o__Neisseriales.f__Chromobacteriaceae.g__Paludibacterium	k__Viruses.f__Orthomyxoviridae.g__Isavirus
k__Bacteria.p__Proteobacteria.c__Gammaproteobacteria.o__Aeromonadales.f__Aeromonadaceae.g__Aeromonas	k__Viruses.f__Papillomaviridae.g__Betapapillomavirus
k__Bacteria.p__Chlamydiae.c__Chlamydiia.o__Chlamydiales.f__Parachlamydiaceae.g__Candidatus_Protochlamydia	k__Viruses.f__Bunyaviridae.g__Orthobunyavirus
k__Bacteria.p__Proteobacteria.c__Betaproteobacteria.o__Burkholderiales.f__Comamonadaceae.g__Variovorax	k__Viruses.o__Caudovirales.f__Myoviridae.g__Viunalikevirus
k__Bacteria.p__Proteobacteria.c__Betaproteobacteria.o__Burkholderiales.f__Burkholderiaceae.g__Cupriavidus	k__Viruses.f__Mimiviridae.g__Cafeteriavirus
k__Bacteria.p__Bacteroidetes.c__Flavobacteriia.o__Flavobacteriales.f__Flavobacteriaceae.g__Gelidibacter	k__Viruses.f__Phycodnaviridae.g__Phaeovirus
k__Bacteria.p__Thermotogae.c__Thermotogae.o__Kosmotogales.f__Kosmotogaceae.g__Mesotoga	k__Viruses.o__Picornavirales.f__Picornaviridae.g__Kobuvirus
k__Bacteria.p__Firmicutes.c__Clostridia.o__Clostridiales.f__Lachnospiraceae.g__Cellulosilyticum	k__Viruses.f__Polyomaviridae.g__Polyomavirus
k__Bacteria.p__Actinobacteria.c__Actinobacteria.o__Micrococcales.f__Dermabacteraceae.g__Brachybacterium	k__Viruses.o__Caudovirales.f__Siphoviridae.g__Sfi21dtunalikevirus
k__Archaea.p__Euryarchaeota.c__Halobacteria.o__Halobacteriales.f__Halobacteriaceae.g__Haladaptatus	k__Viruses.f__Ascoviridae.g__Ascovirus
k__Bacteria.p__Proteobacteria.c__Alphaproteobacteria.o__Rhizobiales.f__Phyllobacteriaceae.g__Hoeflea	k__Viruses.o__Tymovirales.f__Tymoviridae.g__Marafivirus
k__Bacteria.p__Verrucomicrobia.c__Verrucomicrobiae.o__Verrucomicrobiales.f__Verrucomicrobia_subdivision_3.g__Pedosphaera	k__Viruses.f__Sphaerolipoviridae.g__Alphasphaerolipovirus
k__Bacteria.p__Proteobacteria.c__Alphaproteobacteria.o__Rhodospirillales.f__Acetobacteraceae.g__Commensalibacter	k__Viruses.o__Picornavirales.f__Picornaviridae.g__Aphthovirus
k__Bacteria.p__Firmicutes.c__Clostridia.o__Thermoanaerobacterales.f__Thermodesulfobiaceae.g__Thermodesulfobium	k__Viruses.o__Herpesvirales.f__Herpesviridae.g__Proboscivirus
k__Bacteria.p__Proteobacteria.c__Alphaproteobacteria.o__Rickettsiales.f__Candidatus_Paracaedibacteraceae.g__Candidatus_Odyssella	k__Viruses.f__Papillomaviridae.g__Lambdapapillomavirus
k__Bacteria.p__Proteobacteria.c__Alphaproteobacteria.o__Rhizobiales.f__Bradyrhizobiaceae.g__Bradyrhizobium	k__Viruses.f__Virgaviridae.g__Furovirus
k__Bacteria.p__Actinobacteria.c__Actinobacteria.o__Streptosporangiales.f__Streptosporangiaceae.g__Herbidospora	k__Viruses.o__Mononegavirales.f__Paramyxoviridae.g__Avulavirus
k__Bacteria.p__Proteobacteria.c__Alphaproteobacteria.o__Rhodobacterales.f__Rhodobacteraceae.g__Ketogulonicigenium	k__Viruses.f__Virgaviridae.g__Pomovirus
k__Archaea.p__Euryarchaeota.c__Methanomicrobia.o__Methanomicrobiales.f__Methanospirillaceae.g__Methanospirillum	k__Viruses.o__Picornavirales.f__Dicistroviridae.g__Cripavirus
k__Bacteria.p__Proteobacteria.c__Alphaproteobacteria.o__Rhodobacterales.f__Hyphomonadaceae.g__Hellea	k__Viruses.f__Reoviridae.g__Cypovirus
k__Bacteria.p__Proteobacteria.c__Gammaproteobacteria.o__Chromatiales.f__Chromatiaceae.g__Thiorhodovibrio	k__Viruses.f__Bunyaviridae.g__Phlebovirus
k__Bacteria.p__Proteobacteria.c__Gammaproteobacteria.g__Wohlfahrtiimonas	k__Viruses.f__Closteroviridae.g__Closterovirus
k__Bacteria.p__Proteobacteria.c__Betaproteobacteria.o__Rhodocyclales.f__Rhodocyclaceae.g__Azovibrio	k__Viruses.f__Astroviridae.g__Avastrovirus
k__Bacteria.p__Proteobacteria.c__Alphaproteobacteria.o__Rhodobacterales.f__Rhodobacteraceae.g__Pannonibacter	k__Viruses.o__Picornavirales.f__Picornaviridae.g__Senecavirus
k__Bacteria.p__Proteobacteria.c__Alphaproteobacteria.o__Rhizobiales.f__Phyllobacteriaceae.g__Mesorhizobium	k__Viruses.o__Herpesvirales.f__Herpesviridae.g__Varicellovirus
k__Bacteria.p__Firmicutes.c__Negativicutes.o__Selenomonadales.f__Sporomusaceae.g__Thermosinus	k__Viruses.f__Poxviridae.g__Leporipoxvirus
k__Bacteria.p__Proteobacteria.c__Alphaproteobacteria.o__Rhodobacterales.f__Hyphomonadaceae.g__Hirschia	k__Viruses.f__Papillomaviridae.g__Alphapapillomavirus
k__Bacteria.p__Proteobacteria.c__Betaproteobacteria.o__Burkholderiales.f__Comamonadaceae.g__Hylemonella	k__Viruses.f__Phycodnaviridae.g__Prasinovirus
k__Bacteria.p__Planctomycetes.c__Phycisphaerae.o__Phycisphaerales.f__Phycisphaeraceae.g__Phycisphaera	k__Viruses.f__Baculoviridae.g__Gammabaculovirus
k__Bacteria.p__Proteobacteria.c__Epsilonproteobacteria.o__Campylobacterales.f__Helicobacteraceae.g__Sulfurimonas	k__Viruses.o__Caudovirales.f__Myoviridae.g__Spo1virus
k__Bacteria.p__Firmicutes.c__Erysipelotrichia.o__Erysipelotrichales.f__Erysipelotrichaceae.g__Holdemania	k__Viruses.o__Herpesvirales.f__Herpesviridae.g__Simplexvirus
k__Bacteria.p__Proteobacteria.c__Betaproteobacteria.o__Burkholderiales.f__Comamonadaceae.g__Caldimonas	k__Viruses.f__Marseilleviridae.g__Marseillevirus
k__Bacteria.p__Proteobacteria.c__Alphaproteobacteria.o__Caulobacterales.f__Caulobacteraceae.g__Caulobacter	k__Viruses.f__Partitiviridae.g__Alphapartitivirus
k__Bacteria.p__Proteobacteria.c__Gammaproteobacteria.o__Oceanospirillales.f__Halomonadaceae.g__Chromohalobacter	k__Viruses.f__Bromoviridae.g__Oleavirus
k__Bacteria.p__Proteobacteria.c__Alphaproteobacteria.o__Rhodobacterales.f__Rhodobacteraceae.g__Gemmobacter	k__Viruses.o__Herpesvirales.f__Herpesviridae.g__Cytomegalovirus
k__Bacteria.p__Bacteroidetes.o__Bacteroidetes_Order_II._Incertae_sedis.f__Rhodothermaceae.g__Rhodothermus	k__Viruses.f__Flaviviridae.g__Pestivirus
k__Bacteria.p__Firmicutes.c__Bacilli.o__Lactobacillales.f__Carnobacteriaceae.g__Granulicatella	k__Viruses.f__Chrysoviridae.g__Chrysovirus
k__Bacteria.p__Proteobacteria.c__Gammaproteobacteria.o__Alteromonadales.f__Alteromonadaceae.g__Alteromonas	k__Viruses.o__Caudovirales.f__Myoviridae.g__Spounalikevirus
k__Bacteria.p__Bacteroidetes.c__Flavobacteriia.o__Flavobacteriales.f__Flavobacteriaceae.g__Eudoraea	k__Viruses.f__Nimaviridae.g__Whispovirus
k__Bacteria.p__Proteobacteria.c__Alphaproteobacteria.o__Sphingomonadales.f__Sphingomonadaceae.g__Sphingorhabdus	k__Viruses.f__Hytrosaviridae.g__Glossinavirus
k__Bacteria.p__Proteobacteria.c__Alphaproteobacteria.o__Rhodospirillales.f__Rhodospirillaceae.g__Thalassospira	k__Viruses.o__Tymovirales.f__Tymoviridae.g__Tymovirus
k__Bacteria.p__Cyanobacteria.o__Nostocales.f__Rivulariaceae.g__Rivularia	k__Viruses.f__Bunyaviridae.g__Hantavirus
k__Bacteria.p__Actinobacteria.c__Actinobacteria.o__Pseudonocardiales.f__Pseudonocardiaceae.g__Alloactinosynnema	k__Viruses.f__Microviridae.g__Microvirus
k__Bacteria.p__Proteobacteria.c__Betaproteobacteria.o__Burkholderiales.f__Comamonadaceae.g__Caenimonas	k__Viruses.f__Mimiviridae.g__Mimivirus
k__Bacteria.p__Proteobacteria.c__Gammaproteobacteria.o__Oceanospirillales.f__Oceanospirillaceae.g__Balneatrix	k__Viruses.o__Picornavirales.f__Secoviridae.g__Fabavirus
k__Bacteria.p__Firmicutes.c__Tissierellia.g__Kallipyga	k__Viruses.o__Herpesvirales.f__Malacoherpesviridae.g__Ostreavirus
k__Bacteria.p__Cyanobacteria.o__Nostocales.f__Nostocaceae.g__Nodularia	k__Viruses.o__Picornavirales.f__Picornaviridae.g__Aquamavirus
k__Bacteria.p__Bacteroidetes.c__Flavobacteriia.o__Flavobacteriales.f__Flavobacteriaceae.g__Flavobacterium	k__Viruses.f__Phycodnaviridae.g__Chlorovirus
k__Bacteria.p__Firmicutes.c__Negativicutes.o__Selenomonadales.f__Sporomusaceae.g__Pelosinus	k__Viruses.f__Closteroviridae.g__Crinivirus
k__Bacteria.p__Bacteroidetes.c__Bacteroidia.o__Bacteroidales.f__Porphyromonadaceae.g__Coprobacter	k__Viruses.g__Higrevirus
k__Bacteria.p__Proteobacteria.c__Alphaproteobacteria.o__Rhodobacterales.f__Rhodobacteraceae.g__Dinoroseobacter	k__Viruses.o__Caudovirales.f__Myoviridae.g__I3likevirus
k__Bacteria.p__Proteobacteria.c__Gammaproteobacteria.o__Enterobacteriales.f__Enterobacteriaceae.g__Salmonella	k__Viruses.f__Bunyaviridae.g__Tospovirus
k__Bacteria.p__Proteobacteria.c__Alphaproteobacteria.o__Rhodobacterales.f__Rhodobacteraceae.g__Thioclava	k__Viruses.f__Phycodnaviridae.g__Prymnesiovirus
k__Bacteria.p__Proteobacteria.c__Gammaproteobacteria.o__Chromatiales.f__Ectothiorhodospiraceae.g__Halorhodospira	k__Viruses.o__Nidovirales.f__Coronaviridae.g__Bafinivirus
k__Bacteria.p__Proteobacteria.c__Betaproteobacteria.o__Neisseriales.f__Neisseriaceae.g__Eikenella	k__Viruses.o__Herpesvirales.f__Herpesviridae.g__Lymphocryptovirus
k__Bacteria.p__Firmicutes.c__Bacilli.o__Bacillales.f__Bacillaceae.g__Halobacillus	k__Viruses.f__Baculoviridae.g__Betabaculovirus
k__Bacteria.p__Proteobacteria.c__Gammaproteobacteria.o__Thiotrichales.f__Piscirickettsiaceae.g__Methylophaga	k__Viruses.o__Mononegavirales.f__Paramyxoviridae.g__Rubulavirus
k__Bacteria.p__Bacteroidetes.c__Cytophagia.o__Cytophagales.f__Cytophagaceae.g__Microscilla	k__Viruses.o__Caudovirales.f__Myoviridae.g__T4likevirus
k__Bacteria.p__Proteobacteria.c__Betaproteobacteria.o__Burkholderiales.f__Oxalobacteraceae.g__Collimonas	k__Viruses.f__Poxviridae.g__Cervidpoxvirus
k__Bacteria.p__Firmicutes.c__Bacilli.o__Bacillales.f__Paenibacillaceae.g__Thermobacillus	k__Viruses.f__Astroviridae.g__Mamastrovirus
k__Bacteria.p__Firmicutes.c__Bacilli.o__Bacillales.g__Gemella	k__Viruses.o__Mononegavirales.f__Rhabdoviridae.g__Novirhabdovirus
k__Bacteria.p__Cyanobacteria.o__Nostocales.f__Microchaetaceae.g__Hassallia	k__Viruses.f__Retroviridae.g__Alpharetrovirus
k__Bacteria.p__Acidobacteria.c__Solibacteres.o__Solibacterales.g__Bryobacter	k__Viruses.f__Poxviridae.g__Orthopoxvirus
k__Bacteria.p__Proteobacteria.c__Alphaproteobacteria.o__Rhodobacterales.f__Rhodobacteraceae.g__Pseudodonghicola	k__Viruses.o__Nidovirales.f__Coronaviridae.g__Betacoronavirus
k__Bacteria.p__Proteobacteria.c__Deltaproteobacteria.o__Myxococcales.f__Cystobacteraceae.g__Cystobacter	k__Viruses.f__Poxviridae.g__Avipoxvirus
k__Bacteria.p__Proteobacteria.c__Alphaproteobacteria.o__Rhodobacterales.f__Rhodobacteraceae.g__Celeribacter	k__Viruses.f__Poxviridae.g__Alphaentomopoxvirus
k__Bacteria.p__Firmicutes.c__Negativicutes.o__Selenomonadales.f__Selenomonadaceae.g__Megamonas	k__Viruses.o__Ligamenvirales.f__Lipothrixviridae.g__Deltalipothrixvirus
k__Bacteria.p__Proteobacteria.c__Betaproteobacteria.o__Burkholderiales.f__Comamonadaceae.g__Verminephrobacter	k__Viruses.f__Adenoviridae.g__Mastadenovirus
k__Bacteria.p__Firmicutes.c__Bacilli.o__Bacillales.f__Bacillaceae.g__Salimicrobium	k__Viruses.f__Poxviridae.g__Capripoxvirus
k__Bacteria.p__Actinobacteria.c__Actinobacteria.o__Geodermatophilales.f__Geodermatophilaceae.g__Geodermatophilus	k__Viruses.f__Luteoviridae.g__Polerovirus
k__Bacteria.p__Actinobacteria.c__Actinobacteria.o__Propionibacteriales.f__Nocardioidaceae.g__Propionicicella	k__Viruses.f__Virgaviridae.g__Hordeivirus
k__Bacteria.p__Proteobacteria.c__Alphaproteobacteria.o__Rhodospirillales.f__Rhodospirillaceae.g__Candidatus_Endolissoclinum	k__Viruses.f__Polydnaviridae.g__Bracovirus
k__Bacteria.p__Proteobacteria.c__Alphaproteobacteria.o__Rhizobiales.f__Xanthobacteraceae.g__Xanthobacter	k__Viruses.f__Poxviridae.g__Molluscipoxvirus
k__Bacteria.p__Actinobacteria.c__Actinobacteria.o__Propionibacteriales.f__Nocardioidaceae.g__Aeromicrobium	k__Viruses.f__Iridoviridae.g__Ranavirus
k__Bacteria.p__Proteobacteria.c__Betaproteobacteria.o__Methylophilales.f__Methylophilaceae.g__Methylophilus	k__Viruses.o__Herpesvirales.f__Herpesviridae.g__Rhadinovirus
k__Bacteria.p__Bacteroidetes.c__Flavobacteriia.o__Flavobacteriales.f__Flavobacteriaceae.g__Salegentibacter	k__Viruses.f__Caulimoviridae.g__Badnavirus
k__Bacteria.p__Proteobacteria.c__Gammaproteobacteria.o__Enterobacteriales.f__Enterobacteriaceae.g__Klebsiella	k__Viruses.f__Flaviviridae.g__Hepacivirus
k__Bacteria.p__Bacteroidetes.c__Flavobacteriia.o__Flavobacteriales.f__Flavobacteriaceae.g__Apibacter	k__Viruses.f__Togaviridae.g__Alphavirus
k__Bacteria.p__Cyanobacteria.o__Nostocales.f__Microchaetaceae.g__Tolypothrix	k__Viruses.o__Mononegavirales.f__Nyamiviridae.g__Nyavirus
k__Bacteria.p__Proteobacteria.c__Gammaproteobacteria.o__Salinisphaerales.f__Salinisphaeraceae.g__Salinisphaera	k__Viruses.f__Hypoviridae.g__Hypovirus
k__Bacteria.p__Proteobacteria.c__Betaproteobacteria.o__Burkholderiales.f__Alcaligenaceae.g__Pusillimonas	k__Viruses.o__Herpesvirales.f__Herpesviridae.g__Percavirus
k__Bacteria.p__Proteobacteria.c__Epsilonproteobacteria.o__Campylobacterales.f__Helicobacteraceae.g__Sulfuricurvum	k__Viruses.g__Emaravirus
k__Bacteria.p__Proteobacteria.c__Betaproteobacteria.o__Neisseriales.f__Chromobacteriaceae.g__Chromobacterium	k__Viruses.f__Hytrosaviridae.g__Muscavirus
k__Bacteria.p__Bacteroidetes.c__Chitinophagia.o__Chitinophagales.f__Saprospiraceae.g__Saprospira	k__Viruses.o__Nidovirales.f__Coronaviridae.g__Alphacoronavirus
k__Bacteria.p__Tenericutes.c__Mollicutes.o__Mycoplasmatales.f__Mycoplasmataceae.g__Mycoplasma	k__Viruses.f__Retroviridae.g__Gammaretrovirus
k__Bacteria.p__Actinobacteria.c__Actinobacteria.o__Micromonosporales.f__Micromonosporaceae.g__Hamadaea	k__Viruses.o__Caudovirales.f__Siphoviridae.g__L5likevirus
k__Bacteria.p__Firmicutes.c__Erysipelotrichia.o__Erysipelotrichales.f__Erysipelotrichaceae.g__Dielma	k__Viruses.f__Anelloviridae.g__Gammatorquevirus
k__Bacteria.p__Firmicutes.c__Clostridia.o__Clostridiales.f__Peptostreptococcaceae.g__Intestinibacter	k__Viruses.o__Caudovirales.f__Podoviridae.g__N4likevirus
k__Bacteria.p__Proteobacteria.c__Gammaproteobacteria.o__Enterobacteriales.f__Enterobacteriaceae.g__Leminorella	k__Viruses.f__Retroviridae.g__Betaretrovirus
k__Bacteria.p__Proteobacteria.c__Gammaproteobacteria.o__Oceanospirillales.f__Hahellaceae.g__Zooshikella	k__Viruses.f__Hepeviridae.g__Piscihepevirus
k__Bacteria.p__Proteobacteria.c__Deltaproteobacteria.o__Desulfuromonadales.f__Geobacteraceae.g__Geoalkalibacter	k__Viruses.f__Caliciviridae.g__Vesivirus
k__Bacteria.p__Fibrobacteres.c__Fibrobacteria.o__Fibrobacterales.f__Fibrobacteraceae.g__Fibrobacter	k__Viruses.f__Papillomaviridae.g__Gammapapillomavirus
k__Bacteria.p__Firmicutes.c__Clostridia.o__Clostridiales.f__Clostridiaceae.g__Hungatella	k__Viruses.f__Partitiviridae.g__Betapartitivirus
k__Bacteria.p__Proteobacteria.c__Betaproteobacteria.o__Burkholderiales.g__Sphaerotilus	k__Viruses.o__Picornavirales.f__Picornaviridae.g__Hepatovirus
k__Bacteria.p__Chlamydiae.c__Chlamydiia.o__Chlamydiales.f__Chlamydiaceae.g__Chlamydia	k__Viruses.f__Baculoviridae.g__Alphabaculovirus
k__Bacteria.p__Firmicutes.c__Bacilli.o__Bacillales.f__Bacillaceae.g__Terribacillus	k__Viruses.o__Caudovirales.f__Siphoviridae.g__Sfi1unalikevirus
k__Bacteria.p__Proteobacteria.c__Alphaproteobacteria.o__Rhodobacterales.f__Rhodobacteraceae.g__Tateyamaria	k__Viruses.o__Herpesvirales.f__Alloherpesviridae.g__Cyprinivirus
k__Bacteria.p__Actinobacteria.c__Actinobacteria.o__Glycomycetales.f__Glycomycetaceae.g__Haloglycomyces	k__Viruses.o__Herpesvirales.f__Alloherpesviridae.g__Batrachovirus
k__Bacteria.p__Firmicutes.c__Bacilli.o__Bacillales.f__Planococcaceae.g__Solibacillus	k__Viruses.f__Retroviridae.g__Lentivirus
k__Archaea.p__Euryarchaeota.c__Halobacteria.o__Natrialbales.f__Natrialbaceae.g__Natrinema	k__Viruses.f__Bromoviridae.g__Bromovirus
k__Bacteria.p__Firmicutes.c__Tissierellia.o__Tissierellales.f__Peptoniphilaceae.g__Peptoniphilus	k__Viruses.f__Bicaudaviridae.g__Bicaudavirus
k__Bacteria.p__Actinobacteria.c__Actinobacteria.o__Pseudonocardiales.f__Pseudonocardiaceae.g__Saccharomonospora	k__Viruses.f__Baculoviridae.g__Deltabaculovirus
k__Bacteria.p__Proteobacteria.c__Gammaproteobacteria.o__Pseudomonadales.f__Moraxellaceae.g__Perlucidibaca	k__Viruses.g__Pithovirus
k__Bacteria.p__Proteobacteria.c__Gammaproteobacteria.o__Chromatiales.f__Chromatiaceae.g__Allochromatium	k__Viruses.o__Picornavirales.f__Picornaviridae.g__Sicinivirus
k__Bacteria.p__Bacteroidetes.c__Flavobacteriia.o__Flavobacteriales.f__Flavobacteriaceae.g__Psychroserpens	k__Viruses.g__Tenuivirus
k__Bacteria.p__Proteobacteria.c__Epsilonproteobacteria.o__Campylobacterales.g__Nitratifractor	k__Viruses.f__Closteroviridae.g__Ampelovirus
k__Bacteria.p__Cyanobacteria.o__Oscillatoriales.g__Pseudanabaena	k__Viruses.g__Bacilladnavirus
k__Bacteria.p__Firmicutes.c__Clostridia.o__Thermoanaerobacterales.f__Thermoanaerobacteraceae.g__Thermacetogenium	k__Viruses.f__Hepadnaviridae.g__Orthohepadnavirus
k__Bacteria.p__Tenericutes.c__Mollicutes.o__Entomoplasmatales.f__Entomoplasmataceae.g__Entomoplasma	k__Viruses.f__Potyviridae.g__Potyvirus
k__Archaea.p__Crenarchaeota.c__Thermoprotei.o__Acidilobales.f__Acidilobaceae.g__Acidilobus	k__Viruses.o__Picornavirales.f__Picornaviridae.g__Salivirus
k__Bacteria.p__Actinobacteria.c__Actinobacteria.o__Corynebacteriales.f__Dietziaceae.g__Dietzia	k__Viruses.o__Herpesvirales.f__Herpesviridae.g__Macavirus
k__Bacteria.p__Proteobacteria.c__Alphaproteobacteria.o__Rhodospirillales.f__Rhodospirillaceae.g__Skermanella	k__Viruses.f__Anelloviridae.g__Alphatorquevirus
k__Bacteria.p__Actinobacteria.c__Actinobacteria.o__Micrococcales.f__Intrasporangiaceae.g__Tetrasphaera	k__Viruses.f__Virgaviridae.g__Tobamovirus
k__Bacteria.p__Proteobacteria.c__Gammaproteobacteria.o__Legionellales.f__Coxiellaceae.g__Coxiella	k__Viruses.f__Iridoviridae.g__Iridovirus
k__Archaea.p__Euryarchaeota.c__Methanomicrobia.o__Methanomicrobiales.f__Methanomicrobiaceae.g__Methanoplanus	k__Viruses.f__Flaviviridae.g__Flavivirus
k__Bacteria.p__Actinobacteria.c__Nitriliruptoria.o__Nitriliruptorales.f__Nitriliruptoraceae.g__Nitriliruptor	k__Viruses.f__Papillomaviridae.g__Dyolambdapapillomavirus
k__Bacteria.p__Proteobacteria.c__Alphaproteobacteria.o__Rickettsiales.f__Anaplasmataceae.g__Wolbachia	k__Viruses.o__Tymovirales.f__Alphaflexiviridae.g__Sclerodarnavirus
k__Archaea.p__Euryarchaeota.c__Methanomicrobia.o__Methanosarcinales.f__Methanosarcinaceae.g__Methanomethylovorans	k__Viruses.o__Picornavirales.f__Dicistroviridae.g__Aparavirus
k__Bacteria.p__Firmicutes.c__Bacilli.o__Bacillales.f__Bacillaceae.g__Anaerobacillus	k__Viruses.o__Picornavirales.f__Secoviridae.g__Cheravirus
k__Bacteria.p__Proteobacteria.c__Alphaproteobacteria.o__Rhizobiales.f__Methylocystaceae.g__Methylosinus	k__Viruses.o__Tymovirales.f__Betaflexiviridae.g__Carlavirus
k__Bacteria.p__Proteobacteria.c__Alphaproteobacteria.o__Rhodospirillales.f__Acetobacteraceae.g__Acidocella	k__Viruses.o__Herpesvirales.f__Herpesviridae.g__Mardivirus
k__Bacteria.p__Actinobacteria.c__Actinobacteria.o__Geodermatophilales.f__Geodermatophilaceae.g__Modestobacter	k__Viruses.f__Adenoviridae.g__Aviadenovirus
k__Bacteria.p__Proteobacteria.c__Betaproteobacteria.o__Rhodocyclales.f__Rhodocyclaceae.g__Azonexus	k__Viruses.o__Nidovirales.f__Coronaviridae.g__Gammacoronavirus
k__Archaea.p__Euryarchaeota.c__Halobacteria.o__Halobacteriales.f__Halobacteriaceae.g__Halalkalicoccus	k__Viruses.o__Caudovirales.f__Podoviridae.g__Phikmvlikevirus
k__Bacteria.p__Actinobacteria.c__Actinobacteria.o__Bifidobacteriales.f__Bifidobacteriaceae.g__Scardovia	k__Viruses.o__Tymovirales.f__Alphaflexiviridae.g__Potexvirus
k__Bacteria.p__Proteobacteria.c__Betaproteobacteria.o__Nitrosomonadales.f__Nitrosomonadaceae.g__Nitrosomonas	k__Viruses.f__Papillomaviridae.g__Omegapapillomavirus
k__Bacteria.p__Actinobacteria.c__Actinobacteria.o__Micrococcales.f__Micrococcaceae.g__Rothia	k__Viruses.o__Herpesvirales.f__Herpesviridae.g__Roseolovirus
k__Bacteria.p__Actinobacteria.c__Actinobacteria.o__Micrococcales.f__Micrococcaceae.g__Arthrobacter	k__Viruses.f__Arenaviridae.g__Arenavirus
k__Bacteria.p__Proteobacteria.c__Gammaproteobacteria.o__Cellvibrionales.f__Halieaceae.g__Congregibacter	k__Viruses.o__Herpesvirales.f__Alloherpesviridae.g__Ictalurivirus
k__Bacteria.p__Proteobacteria.c__Alphaproteobacteria.o__Rhodospirillales.f__Acetobacteraceae.g__Acetobacter	k__Viruses.o__Mononegavirales.f__Bornaviridae.g__Bornavirus
k__Bacteria.p__Proteobacteria.c__Betaproteobacteria.o__Rhodocyclales.f__Rhodocyclaceae.g__Azospira	k__Viruses.o__Caudovirales.f__Podoviridae.g__T7likevirus
k__Bacteria.p__Actinobacteria.c__Actinobacteria.o__Streptomycetales.f__Streptomycetaceae.g__Kitasatospora	k__Viruses.f__Iridoviridae.g__Lymphocystivirus
k__Bacteria.p__Proteobacteria.c__Alphaproteobacteria.o__Rhodobacterales.f__Rhodobacteraceae.g__Pseudorhodobacter	k__Viruses.f__Anelloviridae.g__Thetatorquevirus
k__Bacteria.p__Proteobacteria.c__Betaproteobacteria.o__Burkholderiales.f__Oxalobacteraceae.g__Oxalobacter	k__Viruses.o__Picornavirales.f__Iflaviridae.g__Iflavirus
k__Bacteria.p__Proteobacteria.c__Acidithiobacillia.o__Acidithiobacillales.f__Acidithiobacillaceae.g__Acidithiobacillus	k__Viruses.f__Papillomaviridae.g__Omikronpapillomavirus
k__Bacteria.p__Proteobacteria.c__Gammaproteobacteria.o__Cellvibrionales.f__Microbulbiferaceae.g__Microbulbifer	k__Viruses.o__Picornavirales.f__Secoviridae.g__Nepovirus
k__Bacteria.p__Proteobacteria.c__Alphaproteobacteria.o__Rhodobacterales.f__Rhodobacteraceae.g__Roseibacterium	k__Viruses.o__Herpesvirales.f__Herpesviridae.g__Muromegalovirus
k__Bacteria.p__Firmicutes.c__Clostridia.o__Clostridiales.f__Peptococcaceae.g__Desulfurispora	k__Viruses.f__Poxviridae.g__Betaentomopoxvirus
k__Bacteria.p__Cyanobacteria.o__Chroococcales.g__Dactylococcopsis	k__Viruses.o__Ligamenvirales.f__Rudiviridae.g__Rudivirus
k__Bacteria.p__Proteobacteria.c__Betaproteobacteria.o__Burkholderiales.f__Oxalobacteraceae.g__Herminiimonas	k__Viruses.o__Picornavirales.f__Picornaviridae.g__Enterovirus
k__Bacteria.p__Dictyoglomi.c__Dictyoglomia.o__Dictyoglomales.f__Dictyoglomaceae.g__Dictyoglomus	k__Viruses.f__Phycodnaviridae.g__Coccolithovirus
k__Bacteria.p__Proteobacteria.c__Gammaproteobacteria.o__Cellvibrionales.f__Cellvibrionaceae.g__Simiduia	k__Viruses.o__Caudovirales.f__Myoviridae.g__Cp220likevirus
k__Bacteria.p__Proteobacteria.c__Alphaproteobacteria.o__Rickettsiales.f__Anaplasmataceae.g__Neorickettsia	k__Viruses.o__Picornavirales.f__Picornaviridae.g__Dicipivirus
k__Bacteria.p__Actinobacteria.c__Actinobacteria.o__Streptosporangiales.f__Thermomonosporaceae.g__Actinomadura	k__Viruses.f__Potyviridae.g__Bymovirus
k__Bacteria.p__Proteobacteria.c__Betaproteobacteria.g__Candidatus_Nasuia	k__Viruses.o__Picornavirales.f__Picornaviridae.g__Sapelovirus
k__Bacteria.p__Firmicutes.c__Bacilli.o__Bacillales.f__Bacillaceae.g__Ornithinibacillus	k__Viruses.f__Polydnaviridae.g__Ichnovirus
k__Bacteria.p__Bacteroidetes.c__Flavobacteriia.o__Flavobacteriales.f__Flavobacteriaceae.g__Olleya	k__Viruses.o__Herpesvirales.f__Herpesviridae.g__Scutavirus
k__Bacteria.p__Actinobacteria.c__Actinobacteria.o__Pseudonocardiales.f__Pseudonocardiaceae.g__Lechevalieria	k__Viruses.o__Herpesvirales.f__Herpesviridae.g__Iltovirus
k__Bacteria.p__Proteobacteria.c__Deltaproteobacteria.o__Desulfuromonadales.f__Geobacteraceae.g__Geobacter	k__Viruses.f__Bromoviridae.g__Cucumovirus
k__Bacteria.p__Proteobacteria.c__Gammaproteobacteria.o__Enterobacteriales.f__Enterobacteriaceae.g__Edwardsiella	k__Viruses.f__Poxviridae.g__Yatapoxvirus
k__Bacteria.p__Deinococcus.Thermus.c__Deinococci.o__Thermales.f__Thermaceae.g__Oceanithermus	k__Viruses.o__Nidovirales.f__Roniviridae.g__Okavirus
k__Archaea.p__Crenarchaeota.c__Thermoprotei.o__Sulfolobales.f__Sulfolobaceae.g__Metallosphaera	k__Viruses.o__Caudovirales.f__Siphoviridae.g__Barnyardlikevirus
k__Bacteria.p__Bacteroidetes.c__Cytophagia.o__Cytophagales.f__Flammeovirgaceae.g__Marivirga	k__Viruses.o__Caudovirales.f__Myoviridae.g__P100virus
k__Bacteria.p__Bacteroidetes.c__Flavobacteriia.o__Flavobacteriales.f__Flavobacteriaceae.g__Algibacter	k__Viruses.o__Caudovirales.f__Siphoviridae.g__Skunalikevirus
k__Bacteria.p__Proteobacteria.c__Gammaproteobacteria.o__Xanthomonadales.f__Xanthomonadaceae.g__Luteimonas	k__Viruses.o__Caudovirales.f__Siphoviridae.g__Cjwunalikevirus
k__Bacteria.p__Proteobacteria.c__Gammaproteobacteria.o__Cellvibrionales.f__Halieaceae.g__Pseudohaliea	k__Viruses.o__Caudovirales.f__Myoviridae.g__Twortlikevirus
k__Bacteria.p__Proteobacteria.c__Alphaproteobacteria.o__Rhodospirillales.f__Rhodospirillaceae.g__Tistrella	k__Viruses.f__Inoviridae.g__Inovirus
k__Archaea.p__Crenarchaeota.c__Thermoprotei.o__Desulfurococcales.f__Desulfurococcaceae.g__Aeropyrum	k__Viruses.f__Circoviridae.g__Gyrovirus
k__Bacteria.p__Proteobacteria.c__Betaproteobacteria.o__Neisseriales.f__Chromobacteriaceae.g__Leeia	k__Viruses.o__Caudovirales.f__Siphoviridae.g__Andromedalikevirus
k__Bacteria.p__Proteobacteria.c__Deltaproteobacteria.o__Desulfobacterales.f__Desulfobacteraceae.g__Desulfotignum	k__Viruses.g__Negevirus
k__Bacteria.p__Actinobacteria.c__Actinobacteria.o__Micrococcales.f__Microbacteriaceae.g__Agreia	k__Viruses.o__Caudovirales.f__Siphoviridae.g__C2likevirus
k__Bacteria.p__Firmicutes.c__Clostridia.o__Clostridiales.f__Clostridiaceae.g__Proteiniclasticum	k__Viruses.o__Picornavirales.f__Picornaviridae.g__Pasivirus
k__Bacteria.p__Actinobacteria.c__Actinobacteria.o__Pseudonocardiales.f__Pseudonocardiaceae.g__Lentzea	k__Viruses.o__Picornavirales.f__Secoviridae.g__Torradovirus
k__Bacteria.p__Firmicutes.c__Bacilli.o__Bacillales.f__Bacillaceae.g__Psychrobacillus	k__Viruses.f__Benyviridae.g__Benyvirus
k__Bacteria.p__Actinobacteria.c__Actinobacteria.o__Propionibacteriales.f__Propionibacteriaceae.g__Propionimicrobium	k__Archaea.p__Crenarchaeota.c__Thermoprotei.o__Desulfurococcales.f__Desulfurococcaceae.g__Thermogladius
k__Bacteria.p__Proteobacteria.c__Gammaproteobacteria.o__Vibrionales.f__Vibrionaceae.g__Vibrio	k__Archaea.p__Crenarchaeota.c__Thermoprotei.o__Desulfurococcales.f__Desulfurococcaceae.g__Thermosphaera
k__Bacteria.p__Planctomycetes.c__Planctomycetia.o__Planctomycetales.f__Isosphaeraceae.g__Singulisphaera	k__Viruses.f__Geminiviridae.g__Begomovirus
k__Bacteria.p__Firmicutes.c__Bacilli.o__Bacillales.f__Bacillaceae.g__Hydrogenibacillus	k__Viruses.o__Caudovirales.f__Podoviridae.g__Sp6likevirus
k__Bacteria.p__Proteobacteria.c__Betaproteobacteria.o__Methylophilales.f__Methylophilaceae.g__Candidatus_Methylopumilus	k__Viruses.f__Poxviridae.g__Suipoxvirus
k__Bacteria.p__Aquificae.c__Aquificae.o__Aquificales.f__Hydrogenothermaceae.g__Sulfurihydrogenibium	k__Viruses.f__Ampullaviridae.g__Ampullavirus
k__Bacteria.p__Thermotogae.c__Thermotogae.o__Petrotogales.g__Petrotoga	k__Viruses.f__Papillomaviridae.g__Phipapillomavirus
k__Bacteria.p__Proteobacteria.c__Gammaproteobacteria.o__Pseudomonadales.f__Pseudomonadaceae.g__Azotobacter	k__Viruses.f__Arenaviridae.g__Mammarenavirus
k__Bacteria.p__Proteobacteria.c__Alphaproteobacteria.o__Rhizobiales.f__Methylocystaceae.g__Methylocystis	k__Viruses.o__Caudovirales.f__Myoviridae.g__Silviavirus
k__Bacteria.p__Proteobacteria.c__Alphaproteobacteria.g__Geminicoccus	k__Viruses.f__Reoviridae.g__Orbivirus
k__Bacteria.p__Actinobacteria.c__Actinobacteria.o__Catenulisporales.f__Actinospicaceae.g__Actinospica	k__Viruses.o__Mononegavirales.f__Paramyxoviridae.g__Henipavirus
k__Bacteria.p__Acidobacteria.c__Acidobacteriia.o__Acidobacteriales.f__Acidobacteriaceae.g__Granulicella	k__Viruses.o__Mononegavirales.f__Paramyxoviridae.g__Respirovirus
k__Bacteria.p__Firmicutes.c__Bacilli.o__Bacillales.f__Thermoactinomycetaceae.g__Desmospora	k__Viruses.f__Geminiviridae.g__Curtovirus
k__Bacteria.p__Bacteroidetes.c__Bacteroidia.o__Bacteroidales.f__Marinilabiliaceae.g__Geofilum	k__Viruses.f__Iridoviridae.g__Chloriridovirus
k__Bacteria.p__Actinobacteria.c__Actinobacteria.o__Streptosporangiales.f__Streptosporangiaceae.g__Microtetraspora	k__Viruses.f__Anelloviridae.g__Betatorquevirus
k__Bacteria.p__Proteobacteria.c__Deltaproteobacteria.o__Myxococcales.f__Kofleriaceae.g__Haliangium	k__Viruses.f__Virgaviridae.g__Pecluvirus
k__Archaea.p__Candidatus_Korarchaeota.g__Candidatus_Korarchaeum	k__Viruses.o__Mononegavirales.f__Rhabdoviridae.g__Vesiculovirus
k__Bacteria.p__Bacteroidetes.c__Bacteroidia.o__Bacteroidales.f__Prevotellaceae.g__Paraprevotella	k__Viruses.o__Mononegavirales.g__Metapneumovirus
k__Bacteria.p__Aquificae.c__Aquificae.o__Aquificales.f__Aquificaceae.g__Hydrogenobaculum	k__Viruses.o__Caudovirales.f__Myoviridae.g__Kayvirus
k__Bacteria.p__Proteobacteria.c__Gammaproteobacteria.o__Pasteurellales.f__Pasteurellaceae.g__Pasteurella	k__Viruses.f__Bunyaviridae.g__Nairovirus
k__Bacteria.p__Bacteroidetes.c__Flavobacteriia.o__Flavobacteriales.f__Flavobacteriaceae.g__Tenacibaculum	k__Viruses.f__Papillomaviridae.g__Deltapapillomavirus
k__Bacteria.p__Bacteroidetes.c__Chitinophagia.o__Chitinophagales.f__Saprospiraceae.g__Lewinella	k__Viruses.f__Caulimoviridae.g__Caulimovirus
k__Bacteria.p__Actinobacteria.c__Actinobacteria.o__Pseudonocardiales.f__Pseudonocardiaceae.g__Saccharothrix	k__Viruses.o__Nidovirales.f__Mesoniviridae.g__Alphamesonivirus
k__Bacteria.p__Proteobacteria.c__Gammaproteobacteria.o__Cellvibrionales.f__Halieaceae.g__Haliea	k__Viruses.f__Nanoviridae.g__Babuvirus
k__Archaea.p__Euryarchaeota.c__Methanomicrobia.o__Methanosarcinales.f__Methanosarcinaceae.g__Methanococcoides	k__Viruses.f__Fuselloviridae.g__Alphafusellovirus
k__Bacteria.p__Bacteroidetes.c__Chitinophagia.o__Chitinophagales.f__Chitinophagaceae.g__Chitinophaga	k__Viruses.o__Tymovirales.f__Tymoviridae.g__Maculavirus
k__Bacteria.p__Proteobacteria.c__Betaproteobacteria.o__Neisseriales.f__Neisseriaceae.g__Neisseria	k__Viruses.o__Tymovirales.f__Betaflexiviridae.g__Foveavirus
k__Archaea.p__Euryarchaeota.c__Halobacteria.o__Haloferacales.f__Haloferacaceae.g__Haloquadratum	k__Viruses.o__Picornavirales.f__Secoviridae.g__Comovirus
k__Bacteria.p__Proteobacteria.c__Gammaproteobacteria.o__Oceanospirillales.f__Halomonadaceae.g__Halotalea	k__Viruses.o__Caudovirales.f__Siphoviridae.g__Phicbklikevirus
k__Bacteria.p__Bacteroidetes.c__Bacteroidia.o__Bacteroidales.f__Porphyromonadaceae.g__Paludibacter	k__Viruses.o__Caudovirales.f__Siphoviridae.g__Bignuzlikevirus
k__Bacteria.p__Actinobacteria.c__Actinobacteria.o__Pseudonocardiales.f__Pseudonocardiaceae.g__Saccharopolyspora	k__Viruses.o__Caudovirales.f__Siphoviridae.g__Charlielikevirus
k__Bacteria.p__Bacteroidetes.c__Bacteroidia.o__Bacteroidales.f__Prevotellaceae.g__Alloprevotella	k__Viruses.o__Ligamenvirales.f__Lipothrixviridae.g__Betalipothrixvirus
k__Bacteria.p__Cyanobacteria.o__Nostocales.f__Nostocaceae.g__Trichormus	k__Viruses.o__Tymovirales.f__Betaflexiviridae.g__Trichovirus
k__Bacteria.p__Chlorobi.c__Chlorobia.o__Chlorobiales.f__Chlorobiaceae.g__Pelodictyon	k__Viruses.o__Caudovirales.f__Siphoviridae.g__Phietalikevirus
k__Bacteria.p__Synergistetes.c__Synergistia.o__Synergistales.f__Synergistaceae.g__Thermovirga	k__Viruses.o__Caudovirales.f__Siphoviridae.g__Pgonelikevirus
k__Bacteria.p__Proteobacteria.c__Alphaproteobacteria.o__Rhizobiales.f__Hyphomicrobiaceae.g__Filomicrobium	k__Viruses.o__Caudovirales.f__Siphoviridae.g__Lambdalikevirus
k__Bacteria.p__Firmicutes.c__Bacilli.o__Bacillales.f__Bacillaceae.g__Halolactibacillus	k__Viruses.o__Caudovirales.f__Siphoviridae.g__N15likevirus
k__Bacteria.p__Proteobacteria.c__Gammaproteobacteria.o__Alteromonadales.f__Alteromonadaceae.g__Lacimicrobium	k__Viruses.f__Tectiviridae.g__Tectivirus
k__Bacteria.p__Bacteroidetes.c__Cytophagia.o__Cytophagales.f__Cytophagaceae.g__Dyadobacter	k__Viruses.f__Globuloviridae.g__Globulovirus
k__Bacteria.p__Bacteroidetes.c__Flavobacteriia.o__Flavobacteriales.f__Flavobacteriaceae.g__Zobellia	k__Viruses.o__Caudovirales.f__Podoviridae.g__Bcep22likevirus
k__Bacteria.p__Proteobacteria.c__Alphaproteobacteria.o__Rhodospirillales.f__Rhodospirillaceae.g__Nisaea	k__Viruses.f__Papillomaviridae.g__Pipapillomavirus
k__Bacteria.p__Proteobacteria.c__Alphaproteobacteria.o__Rickettsiales.g__Caedibacter	k__Viruses.o__Caudovirales.f__Myoviridae.g__Phikzlikevirus
k__Bacteria.p__Firmicutes.c__Bacilli.o__Bacillales.f__Bacillaceae.g__Halalkalibacillus	k__Viruses.g__Cilevirus
k__Bacteria.p__Firmicutes.c__Bacilli.o__Bacillales.f__Listeriaceae.g__Listeria	k__Viruses.o__Caudovirales.f__Siphoviridae.g__T5likevirus
k__Bacteria.p__Proteobacteria.c__Deltaproteobacteria.o__Myxococcales.f__Nannocystaceae.g__Plesiocystis	k__Viruses.o__Caudovirales.f__Siphoviridae.g__Che9clikevirus
k__Bacteria.p__Proteobacteria.c__Deltaproteobacteria.o__Desulfobacterales.f__Desulfobacteraceae.g__Desulfatitalea	k__Viruses.o__Mononegavirales.g__Pneumovirus
k__Bacteria.p__Proteobacteria.c__Betaproteobacteria.o__Burkholderiales.g__Methylibium	k__Viruses.f__Reoviridae.g__Fijivirus
k__Bacteria.p__Actinobacteria.c__Actinobacteria.o__Micrococcales.f__Micrococcaceae.g__Citricoccus	k__Viruses.o__Caudovirales.f__Myoviridae.g__Felixounalikevirus
k__Bacteria.p__Synergistetes.c__Synergistia.o__Synergistales.f__Synergistaceae.g__Synergistes	k__Viruses.o__Caudovirales.f__Myoviridae.g__P2likevirus
k__Bacteria.p__Proteobacteria.c__Gammaproteobacteria.o__Pasteurellales.f__Pasteurellaceae.g__Mannheimia	k__Viruses.f__Retroviridae.g__Epsilonretrovirus
k__Bacteria.p__Firmicutes.c__Clostridia.o__Thermoanaerobacterales.f__Thermoanaerobacteraceae.g__Carboxydothermus	k__Viruses.o__Picornavirales.f__Secoviridae.g__Sadwavirus
k__Bacteria.p__Bacteroidetes.c__Bacteroidia.o__Bacteroidales.f__Odoribacteraceae.g__Butyricimonas	k__Viruses.o__Mononegavirales.f__Rhabdoviridae.g__Ephemerovirus
k__Bacteria.p__Proteobacteria.c__Betaproteobacteria.o__Rhodocyclales.f__Rhodocyclaceae.g__Methyloversatilis	k__Viruses.f__Parvoviridae.g__Copiparvovirus
k__Bacteria.p__Proteobacteria.c__Alphaproteobacteria.o__Rhodobacterales.f__Rhodobacteraceae.g__Planktomarina	k__Viruses.o__Caudovirales.f__Myoviridae.g__Cp8unalikevirus
k__Bacteria.p__Chloroflexi.c__Ardenticatenia.o__Ardenticatenales.f__Ardenticatenaceae.g__Ardenticatena	k__Viruses.f__Reoviridae.g__Phytoreovirus
k__Bacteria.p__Firmicutes.c__Limnochordia.o__Limnochordales.f__Limnochordaceae.g__Limnochorda	k__Viruses.o__Caudovirales.f__Myoviridae.g__Pbunalikevirus
k__Bacteria.p__Cyanobacteria.o__Chroococcales.g__Acaryochloris	k__Viruses.f__Papillomaviridae.g__Dyoetapapillomavirus
k__Bacteria.p__Proteobacteria.c__Alphaproteobacteria.o__Rhodobacterales.f__Hyphomonadaceae.g__Hyphomonas	k__Viruses.f__Totiviridae.g__Leishmaniavirus
k__Bacteria.p__Proteobacteria.c__Betaproteobacteria.o__Burkholderiales.f__Oxalobacteraceae.g__Herbaspirillum	k__Viruses.o__Caudovirales.f__Myoviridae.g__Hpunalikevirus
k__Bacteria.p__Proteobacteria.c__Alphaproteobacteria.o__Sphingomonadales.f__Erythrobacteraceae.g__Erythrobacter	k__Viruses.f__Papillomaviridae.g__Dyoomikronpapillomavirus
k__Bacteria.p__Proteobacteria.c__Alphaproteobacteria.o__Rhodospirillales.f__Acetobacteraceae.g__Tanticharoenia	k__Viruses.f__Sphaerolipoviridae.g__Gammasphaerolipovirus
k__Bacteria.p__Proteobacteria.c__Deltaproteobacteria.o__Desulfobacterales.f__Desulfobacteraceae.g__Desulfococcus	k__Viruses.o__Caudovirales.f__Siphoviridae.g__Che8likevirus
k__Bacteria.p__Proteobacteria.c__Gammaproteobacteria.o__Oceanospirillales.f__Halomonadaceae.g__Kushneria	k__Viruses.o__Caudovirales.f__Myoviridae.g__Schizot4likevirus
k__Bacteria.p__Bacteroidetes.c__Flavobacteriia.o__Flavobacteriales.f__Flavobacteriaceae.g__Dokdonia	k__Viruses.o__Picornavirales.f__Picornaviridae.g__Megrivirus
k__Bacteria.p__Chlamydiae.c__Chlamydiia.o__Chlamydiales.f__Waddliaceae.g__Waddlia	k__Viruses.o__Mononegavirales.f__Rhabdoviridae.g__Lyssavirus
k__Bacteria.p__Chloroflexi.c__Chloroflexia.o__Chloroflexales.f__Oscillochloridaceae.g__Oscillochloris	k__Viruses.f__Totiviridae.g__Victorivirus
k__Bacteria.p__Proteobacteria.c__Alphaproteobacteria.o__Rhodobacterales.f__Rhodobacteraceae.g__Thalassobius	k__Viruses.o__Caudovirales.f__Siphoviridae.g__C5likevirus
k__Bacteria.p__Proteobacteria.c__Gammaproteobacteria.o__Oceanospirillales.f__Halomonadaceae.g__Carnimonas
k__Bacteria.p__Proteobacteria.c__Gammaproteobacteria.o__Xanthomonadales.f__Xanthomonadaceae.g__Pseudoxanthomonas
k__Archaea.p__Crenarchaeota.c__Thermoprotei.o__Sulfolobales.f__Sulfolobaceae.g__Acidianus
k__Bacteria.p__Cyanobacteria.o__Oscillatoriales.g__Leptolyngbya
k__Bacteria.p__Proteobacteria.c__Gammaproteobacteria.o__Thiotrichales.f__Piscirickettsiaceae.g__Hydrogenovibrio
k__Bacteria.p__Chloroflexi.c__Anaerolineae.o__Anaerolineales.f__Anaerolineaceae.g__Flexilinea
k__Bacteria.p__Bacteroidetes.c__Flavobacteriia.o__Flavobacteriales.f__Crocinitomicaceae.g__Crocinitomix
k__Bacteria.p__Proteobacteria.c__Gammaproteobacteria.o__Orbales.f__Orbaceae.g__Candidatus_Schmidhempelia
k__Bacteria.p__Firmicutes.c__Clostridia.o__Clostridiales.f__Lachnospiraceae.g__Roseburia
k__Bacteria.p__Cyanobacteria.o__Oscillatoriales.g__Planktothrix
k__Bacteria.p__Acidobacteria.c__Solibacteres.o__Solibacterales.f__Solibacteraceae.g__Candidatus_Solibacter
k__Archaea.p__Euryarchaeota.c__Halobacteria.o__Natrialbales.f__Natrialbaceae.g__Halostagnicola
k__Bacteria.p__Bacteroidetes.c__Bacteroidia.o__Bacteroidales.g__Candidatus_Azobacteroides
k__Bacteria.p__Bacteroidetes.c__Flavobacteriia.o__Flavobacteriales.f__Flavobacteriaceae.g__Riemerella
k__Bacteria.p__Actinobacteria.c__Coriobacteriia.o__Coriobacteriales.f__Atopobiaceae.g__Atopobium
k__Bacteria.p__Planctomycetes.c__Planctomycetia.o__Planctomycetales.f__Planctomycetaceae.g__Zavarzinella
k__Bacteria.p__Proteobacteria.c__Alphaproteobacteria.o__Rhodospirillales.f__Acetobacteraceae.g__Rubritepida
k__Bacteria.p__Proteobacteria.c__Gammaproteobacteria.o__Xanthomonadales.f__Rhodanobacteraceae.g__Dokdonella
k__Bacteria.p__Bacteroidetes.c__Bacteroidia.o__Bacteroidales.f__Prevotellaceae.g__Hallella
k__Bacteria.p__Cyanobacteria.o__Oscillatoriales.g__Oscillatoria
k__Bacteria.p__Proteobacteria.c__Alphaproteobacteria.o__Sphingomonadales.f__Sphingomonadaceae.g__Blastomonas
k__Bacteria.p__Planctomycetes.c__Planctomycetia.o__Candidatus_Brocadiales.f__Candidatus_Brocadiaceae.g__Candidatus_Brocadia
k__Bacteria.p__Proteobacteria.c__Epsilonproteobacteria.o__Campylobacterales.f__Helicobacteraceae.g__Helicobacter
k__Bacteria.p__Bacteroidetes.c__Sphingobacteriia.o__Sphingobacteriales.f__Sphingobacteriaceae.g__Mucilaginibacter
k__Bacteria.p__Cyanobacteria.o__Chroococcales.g__Microcystis
k__Bacteria.p__Proteobacteria.c__Alphaproteobacteria.o__Rhodobacterales.f__Rhodobacteraceae.g__Stappia
k__Bacteria.p__Firmicutes.c__Clostridia.o__Halanaerobiales.f__Halobacteroidaceae.g__Halonatronum
k__Archaea.p__Euryarchaeota.c__Thermoplasmata.o__Thermoplasmatales.f__Picrophilaceae.g__Picrophilus
k__Bacteria.p__Bacteroidetes.c__Flavobacteriia.o__Flavobacteriales.f__Flavobacteriaceae.g__Bergeyella
k__Bacteria.p__Cyanobacteria.o__Oscillatoriales.g__Lyngbya
k__Bacteria.p__Synergistetes.c__Synergistia.o__Synergistales.f__Synergistaceae.g__Pyramidobacter
k__Bacteria.p__Bacteroidetes.c__Flavobacteriia.o__Flavobacteriales.f__Flavobacteriaceae.g__Zhouia
k__Bacteria.p__Acidobacteria.c__Holophagae.o__Holophagales.f__Holophagaceae.g__Holophaga
k__Archaea.p__Euryarchaeota.c__Halobacteria.o__Natrialbales.f__Natrialbaceae.g__Salinarchaeum
k__Bacteria.p__Actinobacteria.c__Actinobacteria.o__Micrococcales.f__Microbacteriaceae.g__Yonghaparkia
k__Bacteria.p__Actinobacteria.c__Actinobacteria.o__Streptosporangiales.f__Streptosporangiaceae.g__Microbispora
k__Bacteria.p__Actinobacteria.c__Coriobacteriia.o__Eggerthellales.f__Eggerthellaceae.g__Adlercreutzia
k__Bacteria.p__Proteobacteria.c__Gammaproteobacteria.o__Legionellales.f__Legionellaceae.g__Tatlockia
k__Archaea.p__Euryarchaeota.c__Halobacteria.o__Haloferacales.f__Haloferacaceae.g__Halorubrum
k__Bacteria.p__Cyanobacteria.o__Chroococcales.g__Geminocystis
k__Bacteria.p__Proteobacteria.c__Alphaproteobacteria.o__Rhizobiales.f__Bradyrhizobiaceae.g__Salinarimonas
k__Bacteria.p__Chlamydiae.c__Chlamydiia.o__Chlamydiales.f__Simkaniaceae.g__Simkania
k__Bacteria.p__Proteobacteria.c__Gammaproteobacteria.o__Enterobacteriales.f__Enterobacteriaceae.g__Candidatus_Regiella
k__Bacteria.p__Thermodesulfobacteria.c__Thermodesulfobacteria.o__Thermodesulfobacteriales.f__Thermodesulfobacteriaceae.g__Thermodesulfobacterium
k__Bacteria.p__Firmicutes.c__Clostridia.o__Clostridiales.f__Lachnospiraceae.g__Anaerostipes
k__Bacteria.p__Proteobacteria.c__Gammaproteobacteria.o__Oceanospirillales.f__Halomonadaceae.g__Halomonas
k__Bacteria.p__Proteobacteria.c__Gammaproteobacteria.o__Nevskiales.f__Sinobacteraceae.g__Steroidobacter
k__Bacteria.p__Proteobacteria.c__Alphaproteobacteria.o__Rhizobiales.f__Hyphomicrobiaceae.g__Pelagibacterium
k__Bacteria.p__Bacteroidetes.c__Chitinophagia.o__Chitinophagales.f__Chitinophagaceae.g__Niabella
k__Bacteria.p__Proteobacteria.c__Betaproteobacteria.o__Neisseriales.f__Chromobacteriaceae.g__Chitinilyticum
k__Bacteria.p__Proteobacteria.c__Alphaproteobacteria.o__Rhizobiales.f__Beijerinckiaceae.g__Beijerinckia
k__Bacteria.p__Cyanobacteria.o__Chroococcales.g__Cyanothece
k__Bacteria.p__Proteobacteria.c__Alphaproteobacteria.o__Rhizobiales.f__Methylobacteriaceae.g__Microvirga
k__Bacteria.p__Actinobacteria.c__Acidimicrobiia.o__Acidimicrobiales.f__Acidimicrobiaceae.g__Ilumatobacter
k__Bacteria.p__Deferribacteres.c__Deferribacteres.o__Deferribacterales.f__Deferribacteraceae.g__Flexistipes
k__Bacteria.p__Actinobacteria.c__Coriobacteriia.o__Eggerthellales.f__Eggerthellaceae.g__Denitrobacterium
k__Bacteria.p__Proteobacteria.c__Gammaproteobacteria.o__Xanthomonadales.f__Rhodanobacteraceae.g__Frateuria
k__Bacteria.p__Proteobacteria.c__Betaproteobacteria.o__Hydrogenophilales.f__Hydrogenophilaceae.g__Thiobacillus
k__Bacteria.p__Proteobacteria.c__Gammaproteobacteria.o__Chromatiales.f__Chromatiaceae.g__Rheinheimera
k__Bacteria.p__Proteobacteria.c__Alphaproteobacteria.o__Rhizobiales.f__Xanthobacteraceae.g__Azorhizobium
k__Bacteria.p__Proteobacteria.c__Gammaproteobacteria.o__Oceanospirillales.f__Alcanivoracaceae.g__Kangiella
k__Bacteria.p__Proteobacteria.c__Deltaproteobacteria.o__Syntrophobacterales.f__Syntrophorhabdaceae.g__Syntrophorhabdus
k__Bacteria.p__Deinococcus.Thermus.c__Deinococci.o__Thermales.f__Thermaceae.g__Thermus
k__Bacteria.p__Cyanobacteria.o__Chroococcales.g__Aphanocapsa
k__Bacteria.p__Proteobacteria.c__Gammaproteobacteria.o__Vibrionales.f__Vibrionaceae.g__Candidatus_Photodesmus
k__Bacteria.p__Firmicutes.c__Clostridia.o__Clostridiales.f__Oscillospiraceae.g__Oscillibacter
k__Bacteria.p__Proteobacteria.c__Deltaproteobacteria.o__Desulfovibrionales.f__Desulfohalobiaceae.g__Desulfonatronospira
k__Bacteria.p__Actinobacteria.c__Actinobacteria.o__Bifidobacteriales.f__Bifidobacteriaceae.g__Parascardovia
k__Bacteria.p__Bacteroidetes.c__Cytophagia.o__Cytophagales.f__Cyclobacteriaceae.g__Indibacter
k__Bacteria.p__Cyanobacteria.o__Chroococcales.g__Chamaesiphon
k__Bacteria.p__Proteobacteria.c__Alphaproteobacteria.o__Sphingomonadales.f__Sphingomonadaceae.g__Sphingobium
k__Bacteria.p__Proteobacteria.c__Alphaproteobacteria.o__Rhizobiales.f__Hyphomicrobiaceae.g__Prosthecomicrobium
k__Bacteria.p__Bacteroidetes.c__Bacteroidia.o__Bacteroidales.f__Porphyromonadaceae.g__Parabacteroides
k__Bacteria.p__Bacteroidetes.c__Flavobacteriia.o__Flavobacteriales.f__Flavobacteriaceae.g__Maribacter
k__Bacteria.p__Proteobacteria.c__Betaproteobacteria.o__Burkholderiales.f__Alcaligenaceae.g__Brackiella
k__Bacteria.p__Acidobacteria.c__Blastocatellia.g__Chloracidobacterium
k__Bacteria.p__Proteobacteria.c__Betaproteobacteria.o__Burkholderiales.f__Alcaligenaceae.g__Kerstersia
k__Bacteria.p__Proteobacteria.c__Alphaproteobacteria.o__Rhodobacterales.f__Rhodobacteraceae.g__Nereida
k__Bacteria.p__Chloroflexi.c__Anaerolineae.o__Anaerolineales.f__Anaerolineaceae.g__Leptolinea
k__Bacteria.p__Actinobacteria.c__Actinobacteria.o__Micrococcales.f__Microbacteriaceae.g__Leifsonia
k__Bacteria.p__Proteobacteria.c__Gammaproteobacteria.o__Enterobacteriales.f__Enterobacteriaceae.g__Lelliottia
k__Bacteria.p__Proteobacteria.c__Gammaproteobacteria.o__Alteromonadales.f__Colwelliaceae.g__Colwellia
k__Bacteria.p__Proteobacteria.c__Epsilonproteobacteria.o__Campylobacterales.f__Campylobacteraceae.g__Arcobacter
k__Bacteria.p__Actinobacteria.c__Actinobacteria.o__Micrococcales.f__Microbacteriaceae.g__Agrococcus
k__Bacteria.p__Proteobacteria.c__Gammaproteobacteria.o__Vibrionales.f__Vibrionaceae.g__Grimontia
k__Bacteria.p__Bacteroidetes.c__Flavobacteriia.o__Flavobacteriales.f__Flavobacteriaceae.g__Sediminibacter
k__Bacteria.p__Deferribacteres.c__Deferribacteres.o__Deferribacterales.f__Deferribacteraceae.g__Deferribacter
k__Bacteria.p__Proteobacteria.c__Betaproteobacteria.o__Burkholderiales.g__Thiomonas
k__Bacteria.p__Proteobacteria.c__Betaproteobacteria.o__Rhodocyclales.f__Rhodocyclaceae.g__Thauera
k__Bacteria.p__Actinobacteria.c__Actinobacteria.o__Actinomycetales.f__Actinomycetaceae.g__Varibaculum
k__Bacteria.p__Bacteroidetes.c__Flavobacteriia.o__Flavobacteriales.f__Flavobacteriaceae.g__Bizionia
k__Bacteria.p__Bacteroidetes.c__Bacteroidia.o__Bacteroidales.f__Marinilabiliaceae.g__Anaerophaga
k__Bacteria.p__Cyanobacteria.c__Gloeobacteria.o__Gloeobacterales.g__Gloeobacter
k__Archaea.p__Euryarchaeota.c__Methanomicrobia.o__Methanosarcinales.f__Methanosarcinaceae.g__Methanosarcina
k__Bacteria.p__Actinobacteria.c__Thermoleophilia.o__Solirubrobacterales.f__Conexibacteraceae.g__Conexibacter
k__Bacteria.p__Tenericutes.c__Mollicutes.o__Mycoplasmatales.f__Mycoplasmataceae.g__Ureaplasma
k__Bacteria.p__Actinobacteria.c__Actinobacteria.o__Micrococcales.f__Microbacteriaceae.g__Microbacterium
k__Archaea.p__Euryarchaeota.c__Halobacteria.o__Haloferacales.f__Haloferacaceae.g__Halolamina
k__Bacteria.p__Proteobacteria.c__Epsilonproteobacteria.o__Campylobacterales.f__Campylobacteraceae.g__Sulfurospirillum
k__Bacteria.p__Spirochaetes.c__Spirochaetia.o__Spirochaetales.f__Spirochaetaceae.g__Spirochaeta
k__Bacteria.p__Actinobacteria.c__Actinobacteria.o__Micrococcales.f__Microbacteriaceae.g__Cryobacterium
k__Bacteria.p__Actinobacteria.c__Actinobacteria.o__Corynebacteriales.f__Gordoniaceae.g__Gordonia
k__Bacteria.p__Planctomycetes.c__Planctomycetia.o__Planctomycetales.f__Planctomycetaceae.g__Rubinisphaera
k__Bacteria.p__Actinobacteria.c__Actinobacteria.g__Thermobispora
k__Bacteria.p__Actinobacteria.c__Actinobacteria.o__Glycomycetales.f__Glycomycetaceae.g__Glycomyces
k__Bacteria.p__Proteobacteria.c__Betaproteobacteria.o__Burkholderiales.f__Comamonadaceae.g__Ottowia
k__Bacteria.p__Proteobacteria.c__Alphaproteobacteria.o__Rhizobiales.f__Xanthobacteraceae.g__Ancylobacter
k__Bacteria.p__Firmicutes.c__Clostridia.o__Clostridiales.f__Ruminococcaceae.g__Faecalibacterium
k__Bacteria.p__Firmicutes.c__Bacilli.o__Bacillales.f__Bacillaceae.g__Paucisalibacillus
k__Bacteria.p__Proteobacteria.c__Betaproteobacteria.o__Burkholderiales.f__Burkholderiaceae.g__Polynucleobacter
k__Bacteria.p__Proteobacteria.c__Alphaproteobacteria.o__Rhodospirillales.f__Rhodospirillaceae.g__Caenispirillum
k__Archaea.p__Euryarchaeota.c__Methanomicrobia.o__Methanomicrobiales.f__Methanoregulaceae.g__Methanoregula
k__Archaea.p__Crenarchaeota.c__Thermoprotei.o__Thermoproteales.f__Thermofilaceae.g__Thermofilum
k__Bacteria.p__Proteobacteria.c__Betaproteobacteria.o__Sulfuricellales.f__Sulfuricellaceae.g__Sulfuricella
k__Bacteria.p__Proteobacteria.c__Deltaproteobacteria.o__Bdellovibrionales.f__Bacteriovoracaceae.g__Bacteriovorax
k__Bacteria.p__Bacteroidetes.c__Chitinophagia.o__Chitinophagales.f__Chitinophagaceae.g__Niastella
k__Bacteria.p__Actinobacteria.c__Actinobacteria.o__Micrococcales.f__Micrococcaceae.g__Yaniella
k__Bacteria.p__Proteobacteria.c__Gammaproteobacteria.o__Enterobacteriales.f__Enterobacteriaceae.g__Citrobacter
k__Bacteria.p__Proteobacteria.c__Deltaproteobacteria.o__Myxococcales.f__Polyangiaceae.g__Sorangium
k__Archaea.p__Euryarchaeota.c__Methanomicrobia.o__Methanosarcinales.f__Methermicoccaceae.g__Methermicoccus
k__Bacteria.p__Aquificae.c__Aquificae.o__Aquificales.f__Aquificaceae.g__Hydrogenobacter
k__Bacteria.p__Synergistetes.c__Synergistia.o__Synergistales.f__Synergistaceae.g__Cloacibacillus
k__Bacteria.p__Firmicutes.c__Clostridia.o__Clostridiales.f__Lachnospiraceae.g__Sellimonas
k__Archaea.p__Thaumarchaeota.g__Candidatus_Nitrosotenuis
k__Bacteria.p__Rhodothermaeota.c__Balneolia.o__Balneolales.f__Balneolaceae.g__Gracilimonas
k__Archaea.p__Crenarchaeota.c__Thermoprotei.o__Thermoproteales.f__Thermoproteaceae.g__Caldivirga
k__Bacteria.p__Firmicutes.c__Clostridia.o__Clostridiales.f__Clostridiales_Family_XIII._Incertae_Sedis.g__Casaltella
k__Archaea.p__Crenarchaeota.c__Thermoprotei.o__Desulfurococcales.f__Desulfurococcaceae.g__Thermosphaera
k__Bacteria.p__Proteobacteria.c__Betaproteobacteria.o__Neisseriales.f__Chromobacteriaceae.g__Deefgea
k__Bacteria.p__Proteobacteria.c__Alphaproteobacteria.o__Rhizobiales.f__Phyllobacteriaceae.g__Aquamicrobium
k__Bacteria.p__Deferribacteres.c__Deferribacteres.o__Deferribacterales.f__Deferribacteraceae.g__Geovibrio
k__Bacteria.p__Firmicutes.c__Clostridia.o__Clostridiales.f__Ruminococcaceae.g__Subdoligranulum

## Sheet: EDF 4j
Kraken Taxa	SHOGUN Taxa
k__Viruses.f__Phycodnaviridae.g__Prasinovirus	k__Archaea.p__Crenarchaeota.c__Thermoprotei.o__Sulfolobales.f__Sulfolobaceae.g__Sulfolobus
k__Viruses.o__Caudovirales.f__Siphoviridae.g__Sfi1unalikevirus	k__Archaea.p__Euryarchaeota.c__Thermoplasmata.o__Thermoplasmatales.f__Ferroplasmaceae.g__Acidiplasma
k__Viruses.o__Herpesvirales.f__Herpesviridae.g__Simplexvirus	k__Bacteria.__.__.__.__.__
k__Viruses.o__Caudovirales.f__Siphoviridae.g__C2likevirus	k__Bacteria.p__.c__.o__.f__.g__
k__Viruses.f__Poxviridae.g__Parapoxvirus	k__Bacteria.p__Actinobacteria.__.__.__.__
k__Viruses.f__Papillomaviridae.g__Dyolambdapapillomavirus	k__Bacteria.p__Actinobacteria.c__Actinobacteria.__.__.__
k__Viruses.o__Caudovirales.f__Siphoviridae.g__Bignuzlikevirus	k__Bacteria.p__Actinobacteria.c__Actinobacteria.o__Actinomycetales.f__Actinomycetaceae.g__Actinomyces
k__Viruses.o__Mononegavirales.f__Bornaviridae.g__Bornavirus	k__Bacteria.p__Actinobacteria.c__Actinobacteria.o__Bifidobacteriales.f__Bifidobacteriaceae.__
k__Viruses.f__Bicaudaviridae.g__Bicaudavirus	k__Bacteria.p__Actinobacteria.c__Actinobacteria.o__Bifidobacteriales.f__Bifidobacteriaceae.g__Bifidobacterium
k__Viruses.o__Picornavirales.f__Picornaviridae.g__Aquamavirus	k__Bacteria.p__Actinobacteria.c__Actinobacteria.o__Corynebacteriales.__.__
k__Viruses.o__Herpesvirales.f__Herpesviridae.g__Scutavirus	k__Bacteria.p__Actinobacteria.c__Actinobacteria.o__Corynebacteriales.f__Corynebacteriaceae.g__
k__Viruses.o__Herpesvirales.f__Herpesviridae.g__Mardivirus	k__Bacteria.p__Actinobacteria.c__Actinobacteria.o__Corynebacteriales.f__Corynebacteriaceae.g__Corynebacterium
k__Viruses.f__Baculoviridae.g__Deltabaculovirus	k__Bacteria.p__Actinobacteria.c__Actinobacteria.o__Corynebacteriales.f__Gordoniaceae.g__Gordonia
k__Viruses.f__Papillomaviridae.g__Taupapillomavirus	k__Bacteria.p__Actinobacteria.c__Actinobacteria.o__Corynebacteriales.f__Mycobacteriaceae.g__Mycobacterium
k__Viruses.o__Caudovirales.f__Myoviridae.g__I3likevirus	k__Bacteria.p__Actinobacteria.c__Actinobacteria.o__Corynebacteriales.f__Nocardiaceae.g__Nocardia
k__Viruses.f__Virgaviridae.g__Furovirus	k__Bacteria.p__Actinobacteria.c__Actinobacteria.o__Geodermatophilales.f__Geodermatophilaceae.__
k__Viruses.o__Herpesvirales.f__Herpesviridae.g__Proboscivirus	k__Bacteria.p__Actinobacteria.c__Actinobacteria.o__Kineosporiales.f__Kineosporiaceae.g__Kineococcus
k__Viruses.o__Herpesvirales.f__Alloherpesviridae.g__Ictalurivirus	k__Bacteria.p__Actinobacteria.c__Actinobacteria.o__Micrococcales.__.__
k__Viruses.f__Inoviridae.g__Inovirus	k__Bacteria.p__Actinobacteria.c__Actinobacteria.o__Micrococcales.f__Dermabacteraceae.g__Brachybacterium
k__Viruses.f__Marseilleviridae.g__Marseillevirus	k__Bacteria.p__Actinobacteria.c__Actinobacteria.o__Micrococcales.f__Intrasporangiaceae.g__Tetrasphaera
k__Viruses.o__Nidovirales.f__Coronaviridae.g__Gammacoronavirus	k__Bacteria.p__Actinobacteria.c__Actinobacteria.o__Micrococcales.f__Microbacteriaceae.__
k__Viruses.f__Anelloviridae.g__Thetatorquevirus	k__Bacteria.p__Actinobacteria.c__Actinobacteria.o__Micrococcales.f__Microbacteriaceae.g__Curtobacterium
k__Viruses.f__Ascoviridae.g__Ascovirus	k__Bacteria.p__Actinobacteria.c__Actinobacteria.o__Micrococcales.f__Microbacteriaceae.g__Leucobacter
k__Viruses.o__Tymovirales.f__Tymoviridae.g__Maculavirus	k__Bacteria.p__Actinobacteria.c__Actinobacteria.o__Micrococcales.f__Microbacteriaceae.g__Microbacterium
k__Viruses.g__Negevirus	k__Bacteria.p__Actinobacteria.c__Actinobacteria.o__Micrococcales.f__Microbacteriaceae.g__Rathayibacter
k__Viruses.o__Caudovirales.f__Myoviridae.g__Spo1virus	k__Bacteria.p__Actinobacteria.c__Actinobacteria.o__Micrococcales.f__Micrococcaceae.__
k__Viruses.f__Circoviridae.g__Gyrovirus	k__Bacteria.p__Actinobacteria.c__Actinobacteria.o__Micrococcales.f__Micrococcaceae.g__Arthrobacter
k__Viruses.o__Mononegavirales.f__Rhabdoviridae.g__Novirhabdovirus	k__Bacteria.p__Actinobacteria.c__Actinobacteria.o__Micrococcales.f__Micrococcaceae.g__Kocuria
k__Viruses.o__Picornavirales.f__Picornaviridae.g__Sicinivirus	k__Bacteria.p__Actinobacteria.c__Actinobacteria.o__Micrococcales.f__Micrococcaceae.g__Micrococcus
k__Viruses.o__Mononegavirales.g__Pneumovirus	k__Bacteria.p__Actinobacteria.c__Actinobacteria.o__Micrococcales.f__Micrococcaceae.g__Rothia
k__Viruses.o__Picornavirales.f__Picornaviridae.g__Dicipivirus	k__Bacteria.p__Actinobacteria.c__Actinobacteria.o__Propionibacteriales.__.__
k__Viruses.f__Poxviridae.g__Molluscipoxvirus	k__Bacteria.p__Actinobacteria.c__Actinobacteria.o__Propionibacteriales.f__Nocardioidaceae.__
k__Viruses.o__Tymovirales.f__Tymoviridae.g__Tymovirus	k__Bacteria.p__Actinobacteria.c__Actinobacteria.o__Propionibacteriales.f__Nocardioidaceae.g__Friedmanniella
k__Viruses.f__Arenaviridae.g__Mammarenavirus	k__Bacteria.p__Actinobacteria.c__Actinobacteria.o__Propionibacteriales.f__Nocardioidaceae.g__Nocardioides
k__Viruses.f__Totiviridae.g__Victorivirus	k__Bacteria.p__Actinobacteria.c__Actinobacteria.o__Propionibacteriales.f__Propionibacteriaceae.__
k__Viruses.f__Flaviviridae.g__Hepacivirus	k__Bacteria.p__Actinobacteria.c__Actinobacteria.o__Propionibacteriales.f__Propionibacteriaceae.g__Cutibacterium
k__Viruses.f__Poxviridae.g__Alphaentomopoxvirus	k__Bacteria.p__Actinobacteria.c__Actinobacteria.o__Propionibacteriales.f__Propionibacteriaceae.g__Microlunatus
k__Viruses.f__Anelloviridae.g__Gammatorquevirus	k__Bacteria.p__Actinobacteria.c__Actinobacteria.o__Pseudonocardiales.f__Pseudonocardiaceae.__
k__Viruses.o__Tymovirales.f__Gammaflexiviridae.g__Mycoflexivirus	k__Bacteria.p__Actinobacteria.c__Actinobacteria.o__Streptosporangiales.f__Streptosporangiaceae.g__Sphaerimonospora
k__Viruses.g__Tenuivirus	k__Bacteria.p__Actinobacteria.c__Coriobacteriia.o__Coriobacteriales.f__Atopobiaceae.g__Atopobium
k__Viruses.f__Hepeviridae.g__Piscihepevirus	k__Bacteria.p__Actinobacteria.c__Coriobacteriia.o__Coriobacteriales.f__Atopobiaceae.g__Olsenella
k__Viruses.f__Virgaviridae.g__Pomovirus	k__Bacteria.p__Actinobacteria.c__Coriobacteriia.o__Eggerthellales.f__Eggerthellaceae.g__
k__Viruses.f__Caulimoviridae.g__Badnavirus	k__Bacteria.p__Actinobacteria.c__Thermoleophilia.o__Solirubrobacterales.__.__
k__Viruses.f__Polydnaviridae.g__Ichnovirus	k__Bacteria.p__Actinobacteria.c__Thermoleophilia.o__Solirubrobacterales.f__Solirubrobacteraceae.g__Solirubrobacter
k__Viruses.o__Herpesvirales.f__Herpesviridae.g__Percavirus	k__Bacteria.p__Armatimonadetes.__.__.__.__
k__Viruses.f__Papillomaviridae.g__Betapapillomavirus	k__Bacteria.p__Bacteroidetes.__.__.__.__
k__Viruses.f__Togaviridae.g__Alphavirus	k__Bacteria.p__Bacteroidetes.c__Bacteroidia.o__Bacteroidales.__.__
k__Viruses.o__Tymovirales.f__Betaflexiviridae.g__Trichovirus	k__Bacteria.p__Bacteroidetes.c__Bacteroidia.o__Bacteroidales.f__Porphyromonadaceae.g__Porphyromonas
k__Viruses.o__Caudovirales.f__Podoviridae.g__Bcep22likevirus	k__Bacteria.p__Bacteroidetes.c__Bacteroidia.o__Bacteroidales.f__Porphyromonadaceae.g__Sanguibacteroides
k__Viruses.o__Tymovirales.f__Alphaflexiviridae.g__Sclerodarnavirus	k__Bacteria.p__Bacteroidetes.c__Bacteroidia.o__Bacteroidales.f__Prevotellaceae.g__Alloprevotella
k__Viruses.f__Phycodnaviridae.g__Coccolithovirus	k__Bacteria.p__Bacteroidetes.c__Bacteroidia.o__Bacteroidales.f__Prevotellaceae.g__Prevotella
k__Viruses.o__Ligamenvirales.f__Lipothrixviridae.g__Deltalipothrixvirus	k__Bacteria.p__Bacteroidetes.c__Chitinophagia.o__Chitinophagales.f__Chitinophagaceae.__
k__Viruses.f__Papillomaviridae.g__Omikronpapillomavirus	k__Bacteria.p__Bacteroidetes.c__Cytophagia.o__Cytophagales.__.__
k__Viruses.f__Retroviridae.g__Alpharetrovirus	k__Bacteria.p__Bacteroidetes.c__Cytophagia.o__Cytophagales.f__Hymenobacteraceae.__
k__Viruses.o__Caudovirales.f__Siphoviridae.g__Jerseylikevirus	k__Bacteria.p__Bacteroidetes.c__Cytophagia.o__Cytophagales.f__Hymenobacteraceae.g__Hymenobacter
k__Viruses.f__Poxviridae.g__Capripoxvirus	k__Bacteria.p__Bacteroidetes.c__Flavobacteriia.__.__.__
k__Viruses.f__Poxviridae.g__Cervidpoxvirus	k__Bacteria.p__Bacteroidetes.c__Flavobacteriia.o__Flavobacteriales.__.__
k__Viruses.g__Higrevirus	k__Bacteria.p__Bacteroidetes.c__Flavobacteriia.o__Flavobacteriales.f__Flavobacteriaceae.__
k__Viruses.f__Potyviridae.g__Bymovirus	k__Bacteria.p__Bacteroidetes.c__Flavobacteriia.o__Flavobacteriales.f__Flavobacteriaceae.g__Capnocytophaga
k__Viruses.o__Caudovirales.f__Podoviridae.g__Phikmvlikevirus	k__Bacteria.p__Bacteroidetes.c__Flavobacteriia.o__Flavobacteriales.f__Flavobacteriaceae.g__Chryseobacterium
k__Viruses.o__Picornavirales.f__Picornaviridae.g__Tremovirus	k__Bacteria.p__Bacteroidetes.c__Flavobacteriia.o__Flavobacteriales.f__Flavobacteriaceae.g__Cloacibacterium
k__Viruses.o__Picornavirales.f__Secoviridae.g__Torradovirus	k__Bacteria.p__Bacteroidetes.c__Flavobacteriia.o__Flavobacteriales.f__Flavobacteriaceae.g__Flavobacterium
k__Viruses.o__Caudovirales.f__Siphoviridae.g__T5likevirus	k__Bacteria.p__Bacteroidetes.c__Flavobacteriia.o__Flavobacteriales.f__Flavobacteriaceae.g__Myroides
k__Viruses.o__Nidovirales.f__Coronaviridae.g__Bafinivirus	k__Bacteria.p__Bacteroidetes.c__Sphingobacteriia.o__Sphingobacteriales.f__Sphingobacteriaceae.__
k__Viruses.f__Baculoviridae.g__Alphabaculovirus	k__Bacteria.p__Bacteroidetes.c__Sphingobacteriia.o__Sphingobacteriales.f__Sphingobacteriaceae.g__Pedobacter
k__Viruses.f__Papillomaviridae.g__Mupapillomavirus	k__Bacteria.p__Bacteroidetes.c__Sphingobacteriia.o__Sphingobacteriales.f__Sphingobacteriaceae.g__Sphingobacterium
k__Viruses.o__Caudovirales.f__Siphoviridae.g__Lambdalikevirus	k__Bacteria.p__Candidatus.Kryptonia.c__.__.__.__
k__Viruses.o__Caudovirales.f__Myoviridae.g__Felixounalikevirus	k__Bacteria.p__Candidatus.Kryptonia.c__.o__.f__.g__Candidatus.Kryptobacter
k__Viruses.f__Papillomaviridae.g__Phipapillomavirus	k__Bacteria.p__Candidatus.Kryptonia.c__.o__.f__.g__Candidatus.Kryptonium
k__Viruses.f__Papillomaviridae.g__Omegapapillomavirus	k__Bacteria.p__Candidatus.Tectomicrobia.c__.o__.f__.__
k__Viruses.o__Nidovirales.f__Coronaviridae.g__Betacoronavirus	k__Bacteria.p__Candidatus.Tectomicrobia.c__.o__.f__.g__Candidatus.Entotheonella
k__Viruses.f__Luteoviridae.g__Enamovirus	k__Bacteria.p__Chlamydiae.c__Chlamydiia.o__Chlamydiales.f__Chlamydiaceae.g__Chlamydia
k__Viruses.f__Phycodnaviridae.g__Chlorovirus	k__Bacteria.p__Chlamydiae.c__Chlamydiia.o__Parachlamydiales.f__Waddliaceae.g__Waddlia
k__Viruses.f__Hypoviridae.g__Hypovirus	k__Bacteria.p__Chloroflexi.c__Ktedonobacteria.o__Ktedonobacterales.f__Ktedonobacteraceae.g__Ktedonobacter
k__Viruses.f__Anelloviridae.g__Alphatorquevirus	k__Bacteria.p__Cyanobacteria.c__.__.__.__
k__Viruses.o__Picornavirales.f__Dicistroviridae.g__Aparavirus	k__Bacteria.p__Cyanobacteria.c__.o__Chroococcales.f__Aphanothecaceae.g__Crocosphaera
k__Viruses.g__Pithovirus	k__Bacteria.p__Cyanobacteria.c__.o__Nostocales.f__Aphanizomenonaceae.g__Cylindrospermopsis
k__Viruses.f__Phycodnaviridae.g__Phaeovirus	k__Bacteria.p__Cyanobacteria.c__.o__Oscillatoriales.__.__
k__Viruses.o__Picornavirales.f__Picornaviridae.g__Hepatovirus	k__Bacteria.p__Cyanobacteria.c__.o__Oscillatoriales.f__Cyanothecaceae.g__Cyanothece
k__Viruses.f__Virgaviridae.g__Tobamovirus	k__Bacteria.p__Cyanobacteria.c__.o__Synechococcales.f__Prochloraceae.g__Prochlorococcus
k__Viruses.o__Caudovirales.f__Siphoviridae.g__Barnyardlikevirus	k__Bacteria.p__Deinococcus.Thermus.c__Deinococci.o__Deinococcales.f__Deinococcaceae.g__Deinococcus
k__Viruses.f__Baculoviridae.g__Betabaculovirus	k__Bacteria.p__Deinococcus.Thermus.c__Deinococci.o__Thermales.f__Thermaceae.g__Meiothermus
k__Viruses.f__Arenaviridae.g__Arenavirus	k__Bacteria.p__Firmicutes.__.__.__.__
k__Viruses.o__Picornavirales.f__Marnaviridae.g__Marnavirus	k__Bacteria.p__Firmicutes.c__Bacilli.__.__.__
k__Viruses.o__Caudovirales.f__Myoviridae.g__P100virus	k__Bacteria.p__Firmicutes.c__Bacilli.o__Bacillales.__.__
k__Viruses.o__Caudovirales.f__Myoviridae.g__Spounalikevirus	k__Bacteria.p__Firmicutes.c__Bacilli.o__Bacillales.f__.g__Exiguobacterium
k__Viruses.f__Partitiviridae.g__Betapartitivirus	k__Bacteria.p__Firmicutes.c__Bacilli.o__Bacillales.f__.g__Gemella
k__Viruses.f__Reoviridae.g__Cypovirus	k__Bacteria.p__Firmicutes.c__Bacilli.o__Bacillales.f__Bacillaceae.__
k__Viruses.o__Tymovirales.f__Betaflexiviridae.g__Carlavirus	k__Bacteria.p__Firmicutes.c__Bacilli.o__Bacillales.f__Bacillaceae.g__Bacillus
k__Viruses.o__Nidovirales.f__Coronaviridae.g__Alphacoronavirus	k__Bacteria.p__Firmicutes.c__Bacilli.o__Bacillales.f__Bacillaceae.g__Caldibacillus
k__Viruses.o__Mononegavirales.f__Paramyxoviridae.g__Avulavirus	k__Bacteria.p__Firmicutes.c__Bacilli.o__Bacillales.f__Bacillaceae.g__Geobacillus
k__Viruses.o__Herpesvirales.f__Herpesviridae.g__Iltovirus	k__Bacteria.p__Firmicutes.c__Bacilli.o__Bacillales.f__Paenibacillaceae.g__Paenibacillus
k__Viruses.f__Bromoviridae.g__Bromovirus	k__Bacteria.p__Firmicutes.c__Bacilli.o__Bacillales.f__Planococcaceae.g__
k__Viruses.f__Bunyaviridae.g__Phlebovirus	k__Bacteria.p__Firmicutes.c__Bacilli.o__Bacillales.f__Planococcaceae.g__Kurthia
k__Viruses.f__Closteroviridae.g__Closterovirus	k__Bacteria.p__Firmicutes.c__Bacilli.o__Bacillales.f__Planococcaceae.g__Planococcus
k__Viruses.o__Caudovirales.f__Myoviridae.g__Viunalikevirus	k__Bacteria.p__Firmicutes.c__Bacilli.o__Bacillales.f__Staphylococcaceae.__
k__Viruses.o__Caudovirales.f__Siphoviridae.g__Phicbklikevirus	k__Bacteria.p__Firmicutes.c__Bacilli.o__Bacillales.f__Staphylococcaceae.g__Jeotgalicoccus
k__Viruses.f__Fuselloviridae.g__Alphafusellovirus	k__Bacteria.p__Firmicutes.c__Bacilli.o__Bacillales.f__Staphylococcaceae.g__Staphylococcus
k__Viruses.f__Bunyaviridae.g__Orthobunyavirus	k__Bacteria.p__Firmicutes.c__Bacilli.o__Lactobacillales.__.__
k__Viruses.o__Picornavirales.f__Picornaviridae.g__Sapelovirus	k__Bacteria.p__Firmicutes.c__Bacilli.o__Lactobacillales.f__Aerococcaceae.g__Aerococcus
k__Viruses.f__Bunyaviridae.g__Tospovirus	k__Bacteria.p__Firmicutes.c__Bacilli.o__Lactobacillales.f__Carnobacteriaceae.g__Carnobacterium
k__Viruses.f__Mimiviridae.g__Cafeteriavirus	k__Bacteria.p__Firmicutes.c__Bacilli.o__Lactobacillales.f__Enterococcaceae.g__Catellicoccus
k__Viruses.f__Poxviridae.g__Suipoxvirus	k__Bacteria.p__Firmicutes.c__Bacilli.o__Lactobacillales.f__Enterococcaceae.g__Enterococcus
k__Viruses.f__Potyviridae.g__Potyvirus	k__Bacteria.p__Firmicutes.c__Bacilli.o__Lactobacillales.f__Lactobacillaceae.g__Lactobacillus
k__Viruses.o__Herpesvirales.f__Herpesviridae.g__Muromegalovirus	k__Bacteria.p__Firmicutes.c__Bacilli.o__Lactobacillales.f__Leuconostocaceae.__
k__Viruses.o__Picornavirales.f__Picornaviridae.g__Salivirus	k__Bacteria.p__Firmicutes.c__Bacilli.o__Lactobacillales.f__Leuconostocaceae.g__Leuconostoc
k__Viruses.o__Caudovirales.f__Podoviridae.g__N4likevirus	k__Bacteria.p__Firmicutes.c__Bacilli.o__Lactobacillales.f__Leuconostocaceae.g__Weissella
k__Viruses.f__Retroviridae.g__Lentivirus	k__Bacteria.p__Firmicutes.c__Bacilli.o__Lactobacillales.f__Streptococcaceae.__
k__Viruses.o__Picornavirales.f__Secoviridae.g__Fabavirus	k__Bacteria.p__Firmicutes.c__Bacilli.o__Lactobacillales.f__Streptococcaceae.g__Lactococcus
k__Viruses.f__Polydnaviridae.g__Bracovirus	k__Bacteria.p__Firmicutes.c__Bacilli.o__Lactobacillales.f__Streptococcaceae.g__Streptococcus
k__Viruses.o__Herpesvirales.f__Herpesviridae.g__Rhadinovirus	k__Bacteria.p__Firmicutes.c__Clostridia.o__Clostridiales.__.__
k__Viruses.f__Luteoviridae.g__Polerovirus	k__Bacteria.p__Firmicutes.c__Clostridia.o__Clostridiales.f__Clostridiaceae.g__Anaerosalibacter
k__Viruses.f__Flaviviridae.g__Pestivirus	k__Bacteria.p__Firmicutes.c__Clostridia.o__Clostridiales.f__Clostridiales.Family.XIII..Incertae.Sedis.g__
k__Viruses.f__Poxviridae.g__Betaentomopoxvirus	k__Bacteria.p__Firmicutes.c__Clostridia.o__Clostridiales.f__Lachnospiraceae.__
k__Viruses.f__Geminiviridae.g__Begomovirus	k__Bacteria.p__Firmicutes.c__Clostridia.o__Clostridiales.f__Lachnospiraceae.g__Lachnoclostridium
k__Viruses.o__Herpesvirales.f__Alloherpesviridae.g__Cyprinivirus	k__Bacteria.p__Firmicutes.c__Clostridia.o__Clostridiales.f__Peptostreptococcaceae.__
k__Viruses.o__Mononegavirales.f__Nyamiviridae.g__Nyavirus	k__Bacteria.p__Firmicutes.c__Clostridia.o__Clostridiales.f__Peptostreptococcaceae.g__
k__Viruses.f__Potyviridae.g__Rymovirus	k__Bacteria.p__Firmicutes.c__Clostridia.o__Clostridiales.f__Peptostreptococcaceae.g__Intestinibacter
k__Viruses.f__Retroviridae.g__Betaretrovirus	k__Bacteria.p__Firmicutes.c__Clostridia.o__Clostridiales.f__Peptostreptococcaceae.g__Romboutsia
k__Viruses.f__Microviridae.g__Microvirus	k__Bacteria.p__Firmicutes.c__Clostridia.o__Thermoanaerobacterales.f__Thermoanaerobacterales.Family.III..Incertae.Sedis.g__Caldicellulosiruptor
k__Viruses.o__Caudovirales.f__Siphoviridae.g__Andromedalikevirus	k__Bacteria.p__Firmicutes.c__Negativicutes.o__Veillonellales.f__Veillonellaceae.g__Veillonella
k__Viruses.f__Iridoviridae.g__Chloriridovirus	k__Bacteria.p__Firmicutes.c__Tissierellia.o__Tissierellales.f__Peptoniphilaceae.g__Anaerococcus
k__Viruses.o__Picornavirales.f__Picornaviridae.g__Aphthovirus	k__Bacteria.p__Fusobacteria.c__Fusobacteriia.o__Fusobacteriales.f__Fusobacteriaceae.__
k__Viruses.f__Iridoviridae.g__Lymphocystivirus	k__Bacteria.p__Fusobacteria.c__Fusobacteriia.o__Fusobacteriales.f__Fusobacteriaceae.g__Fusobacterium
k__Viruses.o__Tymovirales.f__Alphaflexiviridae.g__Lolavirus	k__Bacteria.p__Fusobacteria.c__Fusobacteriia.o__Fusobacteriales.f__Leptotrichiaceae.g__Leptotrichia
k__Viruses.o__Caudovirales.f__Myoviridae.g__Silviavirus	k__Bacteria.p__Planctomycetes.c__Planctomycetia.o__Planctomycetales.f__Gemmataceae.g__Gemmata
k__Viruses.f__Caliciviridae.g__Vesivirus	k__Bacteria.p__Planctomycetes.c__Planctomycetia.o__Planctomycetales.f__Planctomycetaceae.g__Planctopirus
k__Viruses.f__Poxviridae.g__Avipoxvirus	k__Bacteria.p__Proteobacteria.__.__.__.__
k__Viruses.g__Cilevirus	k__Bacteria.p__Proteobacteria.c__Alphaproteobacteria.__.__.__
k__Viruses.o__Mononegavirales.f__Paramyxoviridae.g__Rubulavirus	k__Bacteria.p__Proteobacteria.c__Alphaproteobacteria.o__Caulobacterales.f__Caulobacteraceae.__
k__Viruses.f__Chrysoviridae.g__Chrysovirus	k__Bacteria.p__Proteobacteria.c__Alphaproteobacteria.o__Caulobacterales.f__Caulobacteraceae.g__Brevundimonas
k__Viruses.o__Caudovirales.f__Myoviridae.g__Twortlikevirus	k__Bacteria.p__Proteobacteria.c__Alphaproteobacteria.o__Rhizobiales.__.__
k__Viruses.g__Emaravirus	k__Bacteria.p__Proteobacteria.c__Alphaproteobacteria.o__Rhizobiales.f__Bradyrhizobiaceae.__
k__Viruses.f__Astroviridae.g__Avastrovirus	k__Bacteria.p__Proteobacteria.c__Alphaproteobacteria.o__Rhizobiales.f__Bradyrhizobiaceae.g__Bradyrhizobium
k__Viruses.o__Picornavirales.f__Secoviridae.g__Cheravirus	k__Bacteria.p__Proteobacteria.c__Alphaproteobacteria.o__Rhizobiales.f__Brucellaceae.g__Ochrobactrum
k__Viruses.o__Ligamenvirales.f__Rudiviridae.g__Rudivirus	k__Bacteria.p__Proteobacteria.c__Alphaproteobacteria.o__Rhizobiales.f__Hyphomicrobiaceae.g__Devosia
k__Viruses.o__Herpesvirales.f__Herpesviridae.g__Varicellovirus	k__Bacteria.p__Proteobacteria.c__Alphaproteobacteria.o__Rhizobiales.f__Methylobacteriaceae.g__Methylobacterium
k__Viruses.f__Polyomaviridae.g__Polyomavirus	k__Bacteria.p__Proteobacteria.c__Alphaproteobacteria.o__Rhizobiales.f__Phyllobacteriaceae.g__Aliihoeflea
k__Viruses.o__Herpesvirales.f__Alloherpesviridae.g__Batrachovirus	k__Bacteria.p__Proteobacteria.c__Alphaproteobacteria.o__Rhizobiales.f__Phyllobacteriaceae.g__Mesorhizobium
k__Viruses.o__Picornavirales.f__Picornaviridae.g__Enterovirus	k__Bacteria.p__Proteobacteria.c__Alphaproteobacteria.o__Rhizobiales.f__Rhizobiaceae.__
k__Viruses.o__Picornavirales.f__Secoviridae.g__Waikavirus	k__Bacteria.p__Proteobacteria.c__Alphaproteobacteria.o__Rhizobiales.f__Rhizobiaceae.g__Rhizobium
k__Viruses.o__Caudovirales.f__Myoviridae.g__T4likevirus	k__Bacteria.p__Proteobacteria.c__Alphaproteobacteria.o__Rhodobacterales.f__Rhodobacteraceae.__
k__Viruses.f__Poxviridae.g__Yatapoxvirus	k__Bacteria.p__Proteobacteria.c__Alphaproteobacteria.o__Rhodobacterales.f__Rhodobacteraceae.g__Haematobacter
k__Viruses.f__Adenoviridae.g__Mastadenovirus	k__Bacteria.p__Proteobacteria.c__Alphaproteobacteria.o__Rhodobacterales.f__Rhodobacteraceae.g__Loktanella
k__Viruses.o__Herpesvirales.f__Herpesviridae.g__Cytomegalovirus	k__Bacteria.p__Proteobacteria.c__Alphaproteobacteria.o__Rhodobacterales.f__Rhodobacteraceae.g__Paracoccus
k__Viruses.o__Picornavirales.f__Picornaviridae.g__Kobuvirus	k__Bacteria.p__Proteobacteria.c__Alphaproteobacteria.o__Rhodobacterales.f__Rhodobacteraceae.g__Roseovarius
k__Viruses.o__Caudovirales.f__Podoviridae.g__T7likevirus	k__Bacteria.p__Proteobacteria.c__Alphaproteobacteria.o__Rhodospirillales.f__Rhodospirillaceae.g__Niveispirillum
k__Viruses.o__Herpesvirales.f__Herpesviridae.g__Roseolovirus	k__Bacteria.p__Proteobacteria.c__Alphaproteobacteria.o__Rhodospirillales.f__Rhodospirillaceae.g__Rhodocista
k__Viruses.f__Adenoviridae.g__Aviadenovirus	k__Bacteria.p__Proteobacteria.c__Alphaproteobacteria.o__Rickettsiales.f__Anaplasmataceae.g__Anaplasma
k__Viruses.o__Ligamenvirales.f__Lipothrixviridae.g__Betalipothrixvirus	k__Bacteria.p__Proteobacteria.c__Alphaproteobacteria.o__Sphingomonadales.__.__
k__Viruses.f__Iridoviridae.g__Ranavirus	k__Bacteria.p__Proteobacteria.c__Alphaproteobacteria.o__Sphingomonadales.f__Erythrobacteraceae.g__Erythrobacter
k__Viruses.f__Closteroviridae.g__Ampelovirus	k__Bacteria.p__Proteobacteria.c__Alphaproteobacteria.o__Sphingomonadales.f__Sphingomonadaceae.__
k__Viruses.o__Caudovirales.f__Siphoviridae.g__Phietalikevirus	k__Bacteria.p__Proteobacteria.c__Alphaproteobacteria.o__Sphingomonadales.f__Sphingomonadaceae.g__Novosphingobium
k__Viruses.o__Caudovirales.f__Siphoviridae.g__Pgonelikevirus	k__Bacteria.p__Proteobacteria.c__Alphaproteobacteria.o__Sphingomonadales.f__Sphingomonadaceae.g__Sphingobium
k__Viruses.f__Orthomyxoviridae.g__Isavirus	k__Bacteria.p__Proteobacteria.c__Alphaproteobacteria.o__Sphingomonadales.f__Sphingomonadaceae.g__Sphingomonas
k__Viruses.f__Poxviridae.g__Orthopoxvirus	k__Bacteria.p__Proteobacteria.c__Betaproteobacteria.__.__.__
k__Viruses.f__Papillomaviridae.g__Gammapapillomavirus	k__Bacteria.p__Proteobacteria.c__Betaproteobacteria.o__Burkholderiales.__.__
k__Viruses.f__Phycodnaviridae.g__Prymnesiovirus	k__Bacteria.p__Proteobacteria.c__Betaproteobacteria.o__Burkholderiales.f__.__
k__Viruses.f__Bunyaviridae.g__Hantavirus	k__Bacteria.p__Proteobacteria.c__Betaproteobacteria.o__Burkholderiales.f__Burkholderiaceae.__
k__Viruses.o__Picornavirales.f__Picornaviridae.g__Senecavirus	k__Bacteria.p__Proteobacteria.c__Betaproteobacteria.o__Burkholderiales.f__Burkholderiaceae.g__Burkholderia
k__Viruses.o__Caudovirales.f__Siphoviridae.g__L5likevirus	k__Bacteria.p__Proteobacteria.c__Betaproteobacteria.o__Burkholderiales.f__Burkholderiaceae.g__Paraburkholderia
k__Viruses.o__Picornavirales.f__Dicistroviridae.g__Cripavirus	k__Bacteria.p__Proteobacteria.c__Betaproteobacteria.o__Burkholderiales.f__Burkholderiaceae.g__Ralstonia
k__Viruses.o__Caudovirales.f__Siphoviridae.g__Tunalikevirus	k__Bacteria.p__Proteobacteria.c__Betaproteobacteria.o__Burkholderiales.f__Comamonadaceae.__
k__Viruses.f__Hytrosaviridae.g__Muscavirus	k__Bacteria.p__Proteobacteria.c__Betaproteobacteria.o__Burkholderiales.f__Comamonadaceae.g__Comamonas
k__Viruses.o__Herpesvirales.f__Herpesviridae.g__Macavirus	k__Bacteria.p__Proteobacteria.c__Betaproteobacteria.o__Burkholderiales.f__Comamonadaceae.g__Curvibacter
k__Viruses.f__Bromoviridae.g__Oleavirus	k__Bacteria.p__Proteobacteria.c__Betaproteobacteria.o__Burkholderiales.f__Oxalobacteraceae.__
k__Viruses.f__Closteroviridae.g__Crinivirus	k__Bacteria.p__Proteobacteria.c__Betaproteobacteria.o__Burkholderiales.f__Oxalobacteraceae.g__Herbaspirillum
k__Viruses.f__Papillomaviridae.g__Lambdapapillomavirus	k__Bacteria.p__Proteobacteria.c__Betaproteobacteria.o__Burkholderiales.f__Oxalobacteraceae.g__Janthinobacterium
k__Viruses.f__Papillomaviridae.g__Alphapapillomavirus	k__Bacteria.p__Proteobacteria.c__Betaproteobacteria.o__Burkholderiales.f__Oxalobacteraceae.g__Massilia
k__Viruses.f__Partitiviridae.g__Alphapartitivirus	k__Bacteria.p__Proteobacteria.c__Betaproteobacteria.o__Hydrogenophilales.f__Hydrogenophilaceae.g__Tepidiphilus
k__Viruses.f__Mimiviridae.g__Mimivirus	k__Bacteria.p__Proteobacteria.c__Betaproteobacteria.o__Neisseriales.f__Chromobacteriaceae.g__Vogesella
k__Viruses.o__Herpesvirales.f__Malacoherpesviridae.g__Ostreavirus	k__Bacteria.p__Proteobacteria.c__Betaproteobacteria.o__Neisseriales.f__Neisseriaceae.__
k__Viruses.o__Mononegavirales.g__Metapneumovirus	k__Bacteria.p__Proteobacteria.c__Betaproteobacteria.o__Neisseriales.f__Neisseriaceae.g__Neisseria
k__Viruses.o__Tymovirales.f__Alphaflexiviridae.g__Potexvirus	k__Bacteria.p__Proteobacteria.c__Deltaproteobacteria.o__Bdellovibrionales.f__Bacteriovoracaceae.g__Bacteriovorax
k__Viruses.o__Caudovirales.f__Siphoviridae.g__Sfi21dtunalikevirus	k__Bacteria.p__Proteobacteria.c__Deltaproteobacteria.o__Myxococcales.__.__
k__Viruses.f__Retroviridae.g__Gammaretrovirus	k__Bacteria.p__Proteobacteria.c__Deltaproteobacteria.o__Myxococcales.f__Archangiaceae.g__Cystobacter
k__Viruses.f__Circoviridae.g__Circovirus	k__Bacteria.p__Proteobacteria.c__Epsilonproteobacteria.o__Campylobacterales.f__Campylobacteraceae.g__Arcobacter
k__Viruses.o__Tymovirales.f__Betaflexiviridae.g__Foveavirus	k__Bacteria.p__Proteobacteria.c__Epsilonproteobacteria.o__Campylobacterales.f__Campylobacteraceae.g__Campylobacter
k__Viruses.o__Picornavirales.f__Secoviridae.g__Nepovirus	k__Bacteria.p__Proteobacteria.c__Gammaproteobacteria.__.__.__
k__Viruses.o__Picornavirales.f__Iflaviridae.g__Iflavirus	k__Bacteria.p__Proteobacteria.c__Gammaproteobacteria.o__.f__.__
k__Viruses.f__Iridoviridae.g__Iridovirus	k__Bacteria.p__Proteobacteria.c__Gammaproteobacteria.o__.f__.g__Candidatus.Endoriftia
k__Viruses.f__Flaviviridae.g__Flavivirus	k__Bacteria.p__Proteobacteria.c__Gammaproteobacteria.o__.f__.g__Candidatus.Thiodiazotropha
k__Viruses.f__Astroviridae.g__Mamastrovirus	k__Bacteria.p__Proteobacteria.c__Gammaproteobacteria.o__.f__Competibacteraceae.g__Candidatus.Contendobacter
k__Viruses.f__Virgaviridae.g__Pecluvirus	k__Bacteria.p__Proteobacteria.c__Gammaproteobacteria.o__Enterobacterales.__.__
k__Viruses.o__Nidovirales.f__Roniviridae.g__Okavirus	k__Bacteria.p__Proteobacteria.c__Gammaproteobacteria.o__Enterobacterales.f__Enterobacteriaceae.__
k__Viruses.g__Bacilladnavirus	k__Bacteria.p__Proteobacteria.c__Gammaproteobacteria.o__Enterobacterales.f__Enterobacteriaceae.g__Atlantibacter
k__Viruses.f__Bromoviridae.g__Cucumovirus	k__Bacteria.p__Proteobacteria.c__Gammaproteobacteria.o__Enterobacterales.f__Enterobacteriaceae.g__Escherichia
k__Viruses.o__Herpesvirales.f__Herpesviridae.g__Lymphocryptovirus	k__Bacteria.p__Proteobacteria.c__Gammaproteobacteria.o__Enterobacterales.f__Enterobacteriaceae.g__Leclercia
k__Viruses.f__Nimaviridae.g__Whispovirus	k__Bacteria.p__Proteobacteria.c__Gammaproteobacteria.o__Oceanospirillales.f__Alcanivoracaceae.g__Alcanivorax
k__Viruses.f__Hytrosaviridae.g__Glossinavirus	k__Bacteria.p__Proteobacteria.c__Gammaproteobacteria.o__Pasteurellales.f__Pasteurellaceae.__
k__Viruses.f__Virgaviridae.g__Hordeivirus	k__Bacteria.p__Proteobacteria.c__Gammaproteobacteria.o__Pasteurellales.f__Pasteurellaceae.g__Haemophilus
k__Viruses.o__Caudovirales.f__Siphoviridae.g__Skunalikevirus	k__Bacteria.p__Proteobacteria.c__Gammaproteobacteria.o__Pseudomonadales.__.__
k__Viruses.o__Caudovirales.f__Myoviridae.g__Cp220likevirus	k__Bacteria.p__Proteobacteria.c__Gammaproteobacteria.o__Pseudomonadales.f__.g__
k__Viruses.o__Tymovirales.f__Tymoviridae.g__Marafivirus	k__Bacteria.p__Proteobacteria.c__Gammaproteobacteria.o__Pseudomonadales.f__Moraxellaceae.__
k__Viruses.o__Caudovirales.f__Myoviridae.g__Phikzlikevirus	k__Bacteria.p__Proteobacteria.c__Gammaproteobacteria.o__Pseudomonadales.f__Moraxellaceae.g__Acinetobacter
k__Viruses.o__Caudovirales.f__Myoviridae.g__Cp8unalikevirus	k__Bacteria.p__Proteobacteria.c__Gammaproteobacteria.o__Pseudomonadales.f__Moraxellaceae.g__Moraxella
k__Viruses.o__Caudovirales.f__Myoviridae.g__PhiCD119likevirus	k__Bacteria.p__Proteobacteria.c__Gammaproteobacteria.o__Pseudomonadales.f__Moraxellaceae.g__Psychrobacter
k__Viruses.f__Papillomaviridae.g__Pipapillomavirus	k__Bacteria.p__Proteobacteria.c__Gammaproteobacteria.o__Pseudomonadales.f__Pseudomonadaceae.__
k__Viruses.o__Picornavirales.f__Picornaviridae.g__Megrivirus	k__Bacteria.p__Proteobacteria.c__Gammaproteobacteria.o__Pseudomonadales.f__Pseudomonadaceae.g__Pseudomonas
k__Viruses.o__Caudovirales.f__Myoviridae.g__Kayvirus	k__Bacteria.p__Proteobacteria.c__Gammaproteobacteria.o__Thiotrichales.f__Piscirickettsiaceae.g__Piscirickettsia
k__Viruses.o__Caudovirales.f__Siphoviridae.g__C5likevirus	k__Bacteria.p__Proteobacteria.c__Gammaproteobacteria.o__Thiotrichales.f__Thiotrichaceae.g__Achromatium
k__Viruses.f__Endornaviridae.g__Endornavirus	k__Bacteria.p__Proteobacteria.c__Gammaproteobacteria.o__Thiotrichales.f__Thiotrichaceae.g__Beggiatoa
k__Viruses.f__Reoviridae.g__Orbivirus	k__Bacteria.p__Proteobacteria.c__Gammaproteobacteria.o__Xanthomonadales.f__Xanthomonadaceae.__
k__Viruses.f__Adenoviridae.g__Atadenovirus	k__Archaea.p__Euryarchaeota.__.__.__.__
k__Viruses.f__Orthomyxoviridae.g__Influenzavirus_C	k__Bacteria.p__.c__.__.__.__
k__Viruses.o__Tymovirales.f__Alphaflexiviridae.g__Botrexvirus	k__Bacteria.p__.c__.o__.f__.__
k__Viruses.f__Poxviridae.g__Leporipoxvirus	k__Bacteria.p__Acidobacteria.__.__.__.__
k__Viruses.o__Caudovirales.f__Podoviridae.g__Phi29likevirus	k__Bacteria.p__Acidobacteria.c__Acidobacteriia.o__Acidobacteriales.f__Acidobacteriaceae.__
k__Viruses.f__Parvoviridae.g__Erythroparvovirus	k__Bacteria.p__Acidobacteria.c__Acidobacteriia.o__Acidobacteriales.f__Acidobacteriaceae.g__
k__Viruses.o__Caudovirales.f__Myoviridae.g__Schizot4likevirus	k__Bacteria.p__Acidobacteria.c__Acidobacteriia.o__Acidobacteriales.f__Acidobacteriaceae.g__Terriglobus
k__Viruses.f__Baculoviridae.g__Gammabaculovirus	k__Bacteria.p__Actinobacteria.c__Actinobacteria.o__Actinomycetales.f__Actinomycetaceae.__
k__Viruses.o__Caudovirales.f__Siphoviridae.g__Yualikevirus	k__Bacteria.p__Actinobacteria.c__Actinobacteria.o__Actinomycetales.f__Actinomycetaceae.g__Actinotignum
k__Viruses.o__Picornavirales.f__Picornaviridae.g__Cosavirus	k__Bacteria.p__Actinobacteria.c__Actinobacteria.o__Actinomycetales.f__Actinomycetaceae.g__Arcanobacterium
k__Viruses.f__Ampullaviridae.g__Ampullavirus	k__Bacteria.p__Actinobacteria.c__Actinobacteria.o__Actinomycetales.f__Actinomycetaceae.g__Flaviflexus
k__Viruses.f__Tectiviridae.g__Tectivirus	k__Bacteria.p__Actinobacteria.c__Actinobacteria.o__Actinomycetales.f__Actinomycetaceae.g__Mobiluncus
k__Viruses.f__Caulimoviridae.g__Cavemovirus	k__Bacteria.p__Actinobacteria.c__Actinobacteria.o__Bifidobacteriales.f__Bifidobacteriaceae.g__Gardnerella
k__Viruses.f__Anelloviridae.g__Epsilontorquevirus	k__Bacteria.p__Actinobacteria.c__Actinobacteria.o__Corynebacteriales.f__.g__Lawsonella
k__Viruses.f__Papillomaviridae.g__Deltapapillomavirus	k__Bacteria.p__Actinobacteria.c__Actinobacteria.o__Corynebacteriales.f__Corynebacteriaceae.__
k__Viruses.f__Parvoviridae.g__Iteradensovirus	k__Bacteria.p__Actinobacteria.c__Actinobacteria.o__Corynebacteriales.f__Corynebacteriaceae.g__Turicella
k__Viruses.o__Mononegavirales.f__Rhabdoviridae.g__Ephemerovirus	k__Bacteria.p__Actinobacteria.c__Actinobacteria.o__Corynebacteriales.f__Dietziaceae.g__Dietzia
k__Viruses.f__Poxviridae.g__Crocodylidpoxvirus	k__Bacteria.p__Actinobacteria.c__Actinobacteria.o__Corynebacteriales.f__Nocardiaceae.__
k__Viruses.f__Anelloviridae.g__Betatorquevirus	k__Bacteria.p__Actinobacteria.c__Actinobacteria.o__Corynebacteriales.f__Nocardiaceae.g__Rhodococcus
k__Viruses.f__Turriviridae.g__Alphaturrivirus	k__Bacteria.p__Actinobacteria.c__Actinobacteria.o__Corynebacteriales.f__Segniliparaceae.g__Segniliparus
k__Viruses.f__Caulimoviridae.g__Caulimovirus	k__Bacteria.p__Actinobacteria.c__Actinobacteria.o__Corynebacteriales.f__Williamsiaceae.g__Williamsia
k__Viruses.o__Caudovirales.f__Siphoviridae.g__P23likevirus	k__Bacteria.p__Actinobacteria.c__Actinobacteria.o__Frankiales.f__Cryptosporangiaceae.g__Cryptosporangium
k__Viruses.o__Caudovirales.f__Myoviridae.g__Pbunalikevirus	k__Bacteria.p__Actinobacteria.c__Actinobacteria.o__Frankiales.f__Frankiaceae.g__Frankia
k__Viruses.f__Globuloviridae.g__Globulovirus	k__Bacteria.p__Actinobacteria.c__Actinobacteria.o__Frankiales.f__Frankiaceae.g__Jatrophihabitans
k__Viruses.f__Reoviridae.g__Fijivirus	k__Bacteria.p__Actinobacteria.c__Actinobacteria.o__Geodermatophilales.f__Geodermatophilaceae.g__Blastococcus
k__Viruses.f__Reoviridae.g__Phytoreovirus	k__Bacteria.p__Actinobacteria.c__Actinobacteria.o__Geodermatophilales.f__Geodermatophilaceae.g__Modestobacter
k__Viruses.f__Benyviridae.g__Benyvirus	k__Bacteria.p__Actinobacteria.c__Actinobacteria.o__Kineosporiales.f__Kineosporiaceae.__
k__Viruses.f__Parvoviridae.g__Protoparvovirus	k__Bacteria.p__Actinobacteria.c__Actinobacteria.o__Kineosporiales.f__Kineosporiaceae.g__Angustibacter
k__Viruses.f__Asfarviridae.g__Asfivirus	k__Bacteria.p__Actinobacteria.c__Actinobacteria.o__Kineosporiales.f__Kineosporiaceae.g__Quadrisphaera
k__Viruses.f__Luteoviridae.g__Luteovirus	k__Bacteria.p__Actinobacteria.c__Actinobacteria.o__Micrococcales.f__Brevibacteriaceae.g__Brevibacterium
k__Viruses.o__Mononegavirales.f__Paramyxoviridae.g__Respirovirus	k__Bacteria.p__Actinobacteria.c__Actinobacteria.o__Micrococcales.f__Cellulomonadaceae.__
k__Viruses.o__Mononegavirales.f__Filoviridae.g__Marburgvirus	k__Bacteria.p__Actinobacteria.c__Actinobacteria.o__Micrococcales.f__Cellulomonadaceae.g__Actinotalea
k__Viruses.f__Fuselloviridae.g__Betafusellovirus	k__Bacteria.p__Actinobacteria.c__Actinobacteria.o__Micrococcales.f__Cellulomonadaceae.g__Cellulomonas
k__Viruses.o__Picornavirales.f__Picornaviridae.g__Pasivirus	k__Bacteria.p__Actinobacteria.c__Actinobacteria.o__Micrococcales.f__Dermabacteraceae.__
k__Viruses.f__Bromoviridae.g__Alfamovirus	k__Bacteria.p__Actinobacteria.c__Actinobacteria.o__Micrococcales.f__Dermacoccaceae.g__Dermacoccus
k__Viruses.o__Caudovirales.f__Podoviridae.g__Sp6likevirus	k__Bacteria.p__Actinobacteria.c__Actinobacteria.o__Micrococcales.f__Dermacoccaceae.g__Kytococcus
k__Viruses.o__Nidovirales.f__Coronaviridae.g__Deltacoronavirus	k__Bacteria.p__Actinobacteria.c__Actinobacteria.o__Micrococcales.f__Dermatophilaceae.g__Mobilicoccus
k__Viruses.f__Inoviridae.g__Plectrovirus	k__Bacteria.p__Actinobacteria.c__Actinobacteria.o__Micrococcales.f__Intrasporangiaceae.__
k__Viruses.o__Picornavirales.f__Secoviridae.g__Sadwavirus	k__Bacteria.p__Actinobacteria.c__Actinobacteria.o__Micrococcales.f__Intrasporangiaceae.g__Arsenicicoccus
k__Viruses.o__Mononegavirales.f__Paramyxoviridae.g__Morbillivirus	k__Bacteria.p__Actinobacteria.c__Actinobacteria.o__Micrococcales.f__Intrasporangiaceae.g__Janibacter
k__Viruses.o__Mononegavirales.g__Orthopneumovirus	k__Bacteria.p__Actinobacteria.c__Actinobacteria.o__Micrococcales.f__Intrasporangiaceae.g__Ornithinimicrobium
k__Viruses.o__Caudovirales.f__Siphoviridae.g__3alikevirus	k__Bacteria.p__Actinobacteria.c__Actinobacteria.o__Micrococcales.f__Intrasporangiaceae.g__Phycicoccus
k__Viruses.o__Tymovirales.f__Alphaflexiviridae.g__Mandarivirus	k__Bacteria.p__Actinobacteria.c__Actinobacteria.o__Micrococcales.f__Intrasporangiaceae.g__Serinicoccus
k__Viruses.f__Togaviridae.g__Rubivirus	k__Bacteria.p__Actinobacteria.c__Actinobacteria.o__Micrococcales.f__Microbacteriaceae.g__Frigoribacterium
k__Viruses.o__Tymovirales.f__Betaflexiviridae.g__Vitivirus	k__Bacteria.p__Actinobacteria.c__Actinobacteria.o__Micrococcales.f__Microbacteriaceae.g__Frondihabitans
k__Viruses.o__Caudovirales.f__Siphoviridae.g__Xp10likevirus	k__Bacteria.p__Actinobacteria.c__Actinobacteria.o__Micrococcales.f__Microbacteriaceae.g__Leifsonia
[truncated: 1,744 more rows]

[truncated: 10 more sheets: EDF 4k, EDF 4l, EDF 4m, EDF 4n, EDF 4o, EDF 4p, EDF 4q, EDF 4r, EDF 4s, EDF 4t]
