# Supplementary material for: RETRACTED ARTICLE: Microbiome analyses of blood and tissues suggest cancerdiagnostic approach
Source: Springer Nature journal article supplement (doi:10.1038/s41586-020-2095-1), 2020-03-11
Supplement: 41586_2020_2095_MOESM11_ESM.xlsx [file 41586_2020_2095_MOESM11_ESM.xlsx]

## Sheet: EDF 5a
	sampleID	investigation	sample_type	Fuso
1	s17489	TCGA-OV	Primary Tumor	7.07404
2	s17512	TCGA-OV	Primary Tumor	6.53033
3	s17498	TCGA-OV	Primary Tumor	5.72472
4	s17535	TCGA-OV	Primary Tumor	5.7366
5	s17482	TCGA-OV	Blood Derived Normal	6.36275
6	s17490	TCGA-OV	Primary Tumor	5.64707
7	s17541	TCGA-OV	Primary Tumor	6.39438
8	s17499	TCGA-OV	Primary Tumor	5.32537
9	s17500	TCGA-OV	Primary Tumor	6.73966
10	s17545	TCGA-OV	Primary Tumor	5.43355
11	s17516	TCGA-OV	Primary Tumor	6.7045
12	s17480	TCGA-OV	Blood Derived Normal	5.93847
13	s17483	TCGA-OV	Blood Derived Normal	6.16348
14	s17484	TCGA-OV	Primary Tumor	6.34455
15	s17525	TCGA-OV	Primary Tumor	7.02661
16	s17513	TCGA-OV	Primary Tumor	6.22828
17	s17495	TCGA-OV	Primary Tumor	6.67875
18	s17537	TCGA-OV	Primary Tumor	6.24747
19	s17493	TCGA-OV	Primary Tumor	7.01773
20	s17511	TCGA-OV	Primary Tumor	6.36963
21	s17520	TCGA-OV	Primary Tumor	6.02601
22	s17486	TCGA-OV	Primary Tumor	6.30774
23	s17494	TCGA-OV	Primary Tumor	7.33283
24	s17540	TCGA-OV	Primary Tumor	5.85781
25	s17530	TCGA-OV	Primary Tumor	6.40966
26	s17543	TCGA-OV	Primary Tumor	6.35908
27	s17531	TCGA-OV	Primary Tumor	6.75632
28	s17523	TCGA-OV	Primary Tumor	6.41111
29	s17522	TCGA-OV	Primary Tumor	7.10592
30	s17526	TCGA-OV	Primary Tumor	6.84111
31	s17505	TCGA-OV	Primary Tumor	7.39042
32	s17496	TCGA-OV	Primary Tumor	7.75153
33	s17501	TCGA-OV	Primary Tumor	7.9084
34	s17497	TCGA-OV	Primary Tumor	6.20785
35	s17527	TCGA-OV	Primary Tumor	6.79464
36	s17492	TCGA-OV	Primary Tumor	6.77262
37	s17546	TCGA-OV	Primary Tumor	5.91815
38	s17524	TCGA-OV	Primary Tumor	7.65044
39	s17491	TCGA-OV	Primary Tumor	7.04611
40	s17487	TCGA-OV	Primary Tumor	5.39556
41	s17517	TCGA-OV	Primary Tumor	5.84868
42	s17506	TCGA-OV	Primary Tumor	6.37218
43	s17536	TCGA-OV	Primary Tumor	5.42089
44	s17518	TCGA-OV	Primary Tumor	7.24476
45	s17519	TCGA-OV	Primary Tumor	6.2464
46	s17507	TCGA-OV	Primary Tumor	6.1995
47	s17532	TCGA-OV	Blood Derived Normal	6.13272
48	s17508	TCGA-OV	Blood Derived Normal	5.80576
49	s17481	TCGA-OV	Primary Tumor	4.75192
50	s17514	TCGA-OV	Primary Tumor	6.06866
51	s17478	TCGA-OV	Primary Tumor	5.19759
52	s17485	TCGA-OV	Primary Tumor	6.56232
53	s17479	TCGA-OV	Blood Derived Normal	5.27866
54	s17503	TCGA-OV	Primary Tumor	6.88158
55	s17542	TCGA-OV	Primary Tumor	6.00204
56	s17538	TCGA-OV	Primary Tumor	5.92287
57	s17534	TCGA-OV	Primary Tumor	6.90788
58	s17515	TCGA-OV	Primary Tumor	6.68863
59	s17539	TCGA-OV	Primary Tumor	6.53282
60	s17509	TCGA-OV	Primary Tumor	7.38443
61	s17510	TCGA-OV	Blood Derived Normal	5.92054
62	s17521	TCGA-OV	Primary Tumor	7.06388
63	s17488	TCGA-OV	Primary Tumor	7.27919
64	s17504	TCGA-OV	Primary Tumor	6.20061
65	s17719	TCGA-OV	Primary Tumor	6.43666
66	s17718	TCGA-OV	Primary Tumor	11.6711
67	s17708	TCGA-OV	Solid Tissue Normal	4.82743
68	s17717	TCGA-OV	Primary Tumor	6.45116
69	s17716	TCGA-OV	Primary Tumor	5.9179
70	s17735	TCGA-OV	Primary Tumor	5.88877
71	s17712	TCGA-OV	Primary Tumor	7.71724
72	s17707	TCGA-OV	Blood Derived Normal	6.26319
73	s17714	TCGA-OV	Primary Tumor	7.50164
74	s17721	TCGA-OV	Solid Tissue Normal	6.24013
75	s17727	TCGA-OV	Primary Tumor	6.44812
76	s17709	TCGA-OV	Blood Derived Normal	5.66779
77	s17706	TCGA-OV	Primary Tumor	5.15449
78	s17731	TCGA-OV	Primary Tumor	4.95033
79	s17713	TCGA-OV	Primary Tumor	6.14098
80	s17725	TCGA-OV	Primary Tumor	7.49677
81	s17730	TCGA-OV	Primary Tumor	6.19597
82	s17728	TCGA-OV	Primary Tumor	6.04889
83	s17710	TCGA-OV	Solid Tissue Normal	5.20693
84	s17720	TCGA-OV	Primary Tumor	6.10811
85	s17715	TCGA-OV	Primary Tumor	5.28105
86	s17724	TCGA-OV	Primary Tumor	6.57931
87	s17722	TCGA-OV	Primary Tumor	6.90289
88	s17734	TCGA-OV	Primary Tumor	6.19896
89	s17732	TCGA-OV	Solid Tissue Normal	5.99601
90	s17711	TCGA-OV	Blood Derived Normal	4.9248
91	s17723	TCGA-OV	Primary Tumor	6.34302
92	s17733	TCGA-OV	Primary Tumor	6.07144
93	s17729	TCGA-OV	Primary Tumor	6.71029
94	s17116	TCGA-OV	Primary Tumor	6.29959
95	s17126	TCGA-OV	Primary Tumor	5.91164
96	s17132	TCGA-OV	Primary Tumor	6.06971
97	s17123	TCGA-OV	Primary Tumor	5.63237
98	s17137	TCGA-OV	Primary Tumor	6.29589
99	s17125	TCGA-OV	Blood Derived Normal	6.08036
100	s17127	TCGA-OV	Primary Tumor	7.04002
101	s17133	TCGA-OV	Primary Tumor	7.00425
102	s17119	TCGA-OV	Primary Tumor	5.78583
103	s17138	TCGA-OV	Primary Tumor	5.69914
104	s17141	TCGA-OV	Primary Tumor	5.55251
105	s17122	TCGA-OV	Blood Derived Normal	6.45689
106	s17129	TCGA-OV	Primary Tumor	6.71036
107	s17140	TCGA-OV	Primary Tumor	6.49378
108	s17145	TCGA-OV	Primary Tumor	6.16894
109	s17139	TCGA-OV	Blood Derived Normal	5.89005
110	s17142	TCGA-OV	Primary Tumor	5.73065
111	s17115	TCGA-OV	Blood Derived Normal	6.38066
112	s17131	TCGA-OV	Primary Tumor	6.48122
113	s17135	TCGA-OV	Primary Tumor	5.4963
114	s17134	TCGA-OV	Primary Tumor	6.63216
115	s17120	TCGA-OV	Primary Tumor	6.15809
116	s17121	TCGA-OV	Primary Tumor	5.26917
117	s17130	TCGA-OV	Primary Tumor	6.7619
118	s17113	TCGA-OV	Primary Tumor	5.51489
119	s17112	TCGA-OV	Blood Derived Normal	5.20195
120	s17118	TCGA-OV	Primary Tumor	6.74038
121	s17146	TCGA-OV	Primary Tumor	6.17294
122	s17114	TCGA-OV	Blood Derived Normal	6.4799
123	s17124	TCGA-OV	Primary Tumor	4.02442
124	s17128	TCGA-OV	Primary Tumor	6.87515
125	s17136	TCGA-OV	Primary Tumor	6.65133
126	s17143	TCGA-OV	Solid Tissue Normal	5.52938
127	s17117	TCGA-OV	Primary Tumor	6.61955
128	s17862	TCGA-OV	Primary Tumor	6.47996
129	s17871	TCGA-OV	Primary Tumor	6.20753
130	s17865	TCGA-OV	Primary Tumor	6.58737
131	s17880	TCGA-OV	Primary Tumor	6.49422
132	s17886	TCGA-OV	Primary Tumor	5.61622
133	s17869	TCGA-OV	Primary Tumor	6.1998
134	s17878	TCGA-OV	Primary Tumor	6.05232
135	s17885	TCGA-OV	Primary Tumor	6.1613
136	s17876	TCGA-OV	Primary Tumor	6.75975
137	s17874	TCGA-OV	Primary Tumor	6.30531
138	s17884	TCGA-OV	Primary Tumor	6.27861
139	s17867	TCGA-OV	Primary Tumor	5.81833
140	s17861	TCGA-OV	Primary Tumor	5.061
141	s17888	TCGA-OV	Primary Tumor	5.52711
142	s17864	TCGA-OV	Primary Tumor	6.76632
143	s17887	TCGA-OV	Primary Tumor	5.27358
144	s17873	TCGA-OV	Primary Tumor	5.41798
145	s17882	TCGA-OV	Primary Tumor	6.41848
146	s17879	TCGA-OV	Primary Tumor	6.9397
147	s17872	TCGA-OV	Primary Tumor	5.96613
148	s17870	TCGA-OV	Primary Tumor	7.14012
149	s17866	TCGA-OV	Primary Tumor	6.27369
150	s17863	TCGA-OV	Primary Tumor	6.62131
151	s17877	TCGA-OV	Primary Tumor	6.25839
152	s17868	TCGA-OV	Blood Derived Normal	4.50866
153	s17881	TCGA-OV	Primary Tumor	6.14553
154	s17875	TCGA-OV	Primary Tumor	7.13307
155	s17283	TCGA-OV	Primary Tumor	6.93122
156	s17312	TCGA-OV	Primary Tumor	7.68657
157	s17289	TCGA-OV	Primary Tumor	5.40467
158	s17295	TCGA-OV	Primary Tumor	6.44501
159	s17286	TCGA-OV	Primary Tumor	5.24289
160	s17318	TCGA-OV	Primary Tumor	6.56123
161	s17322	TCGA-OV	Primary Tumor	5.6189
162	s17290	TCGA-OV	Primary Tumor	9.95139
163	s17314	TCGA-OV	Primary Tumor	6.1047
164	s17305	TCGA-OV	Primary Tumor	6.26703
165	s17313	TCGA-OV	Primary Tumor	6.42828
166	s17299	TCGA-OV	Primary Tumor	6.65198
167	s17301	TCGA-OV	Primary Tumor	6.39917
168	s17293	TCGA-OV	Primary Tumor	5.48099
169	s17282	TCGA-OV	Primary Tumor	6.66909
170	s17288	TCGA-OV	Primary Tumor	5.79133
171	s17280	TCGA-OV	Primary Tumor	6.2964
172	s17308	TCGA-OV	Primary Tumor	5.98192
173	s17296	TCGA-OV	Primary Tumor	5.7196
174	s17287	TCGA-OV	Primary Tumor	7.29166
175	s17319	TCGA-OV	Primary Tumor	6.27475
176	s17309	TCGA-OV	Primary Tumor	7.78553
177	s17284	TCGA-OV	Primary Tumor	7.15947
178	s17291	TCGA-OV	Primary Tumor	6.5461
179	s17298	TCGA-OV	Primary Tumor	6.32749
180	s17292	TCGA-OV	Primary Tumor	6.88944
181	s17281	TCGA-OV	Primary Tumor	7.69336
182	s17306	TCGA-OV	Primary Tumor	6.55504
183	s17307	TCGA-OV	Primary Tumor	6.05762
184	s17321	TCGA-OV	Primary Tumor	5.7308
185	s17303	TCGA-OV	Primary Tumor	5.95199
186	s17297	TCGA-OV	Primary Tumor	5.90824
187	s17317	TCGA-OV	Primary Tumor	6.65546
188	s17300	TCGA-OV	Primary Tumor	5.94019
189	s17285	TCGA-OV	Primary Tumor	6.80929
190	s17310	TCGA-OV	Primary Tumor	6.12571
191	s17320	TCGA-OV	Primary Tumor	5.87347
192	s17304	TCGA-OV	Primary Tumor	6.71937
193	s17302	TCGA-OV	Primary Tumor	5.71308
194	s17294	TCGA-OV	Blood Derived Normal	5.42492
195	s17741	TCGA-OV	Primary Tumor	6.30048
196	s17749	TCGA-OV	Primary Tumor	6.7122
197	s17755	TCGA-OV	Primary Tumor	6.98059
198	s17744	TCGA-OV	Primary Tumor	6.73507
199	s17758	TCGA-OV	Primary Tumor	5.7241
200	s17745	TCGA-OV	Blood Derived Normal	5.29032
201	s17753	TCGA-OV	Blood Derived Normal	7.10389
202	s17740	TCGA-OV	Blood Derived Normal	4.13842
203	s17748	TCGA-OV	Primary Tumor	5.50638
204	s17742	TCGA-OV	Primary Tumor	6.37543
205	s17739	TCGA-OV	Primary Tumor	5.81832
206	s17759	TCGA-OV	Primary Tumor	6.3332
207	s17736	TCGA-OV	Primary Tumor	6.9535
208	s17743	TCGA-OV	Primary Tumor	6.81163
209	s17738	TCGA-OV	Primary Tumor	6.50196
210	s17737	TCGA-OV	Primary Tumor	6.53001
211	s17754	TCGA-OV	Primary Tumor	5.59366
212	s17752	TCGA-OV	Primary Tumor	6.40489
213	s17756	TCGA-OV	Primary Tumor	5.92674
214	s17751	TCGA-OV	Blood Derived Normal	7.60689
215	s17757	TCGA-OV	Primary Tumor	6.47899
216	s17747	TCGA-OV	Primary Tumor	6.45831
217	s17750	TCGA-OV	Primary Tumor	7.1219
218	s17746	TCGA-OV	Primary Tumor	6.93113
219	s17154	TCGA-OV	Primary Tumor	6.73533
220	s17157	TCGA-OV	Primary Tumor	6.3833
221	s17149	TCGA-OV	Primary Tumor	5.14181
222	s17160	TCGA-OV	Primary Tumor	6.1473
223	s17163	TCGA-OV	Primary Tumor	6.04583
224	s17148	TCGA-OV	Primary Tumor	4.43315
225	s17161	TCGA-OV	Primary Tumor	6.0352
226	s17158	TCGA-OV	Primary Tumor	6.40424
227	s17155	TCGA-OV	Primary Tumor	6.05757
228	s17156	TCGA-OV	Primary Tumor	6.30181
229	s17162	TCGA-OV	Primary Tumor	5.69011
230	s17153	TCGA-OV	Primary Tumor	7.63183
231	s17147	TCGA-OV	Primary Tumor	4.46962
232	s17152	TCGA-OV	Primary Tumor	6.30825
233	s17151	TCGA-OV	Primary Tumor	6.88374
234	s17150	TCGA-OV	Primary Tumor	6.1332
235	s17910	TCGA-OV	Primary Tumor	4.45402
236	s17920	TCGA-OV	Primary Tumor	5.36365
237	s17940	TCGA-OV	Primary Tumor	7.1999
238	s17976	TCGA-OV	Primary Tumor	6.38913
239	s17955	TCGA-OV	Primary Tumor	6.13363
240	s17917	TCGA-OV	Primary Tumor	5.62606
241	s17972	TCGA-OV	Primary Tumor	5.48699
242	s17895	TCGA-OV	Primary Tumor	7.03613
243	s17924	TCGA-OV	Primary Tumor	6.19353
244	s17939	TCGA-OV	Primary Tumor	7.12325
245	s17960	TCGA-OV	Primary Tumor	6.85866
246	s17923	TCGA-OV	Primary Tumor	7.11544
247	s17906	TCGA-OV	Primary Tumor	6.2318
248	s17893	TCGA-OV	Primary Tumor	6.33976
249	s17942	TCGA-OV	Primary Tumor	5.7846
250	s17909	TCGA-OV	Primary Tumor	5.89008
251	s17954	TCGA-OV	Primary Tumor	7.17443
252	s17941	TCGA-OV	Primary Tumor	6.53197
253	s17949	TCGA-OV	Primary Tumor	6.10684
254	s17904	TCGA-OV	Primary Tumor	7.0353
255	s17902	TCGA-OV	Primary Tumor	6.07813
256	s17958	TCGA-OV	Primary Tumor	7.02567
257	s17951	TCGA-OV	Primary Tumor	6.33426
258	s17950	TCGA-OV	Blood Derived Normal	6.21732
259	s17916	TCGA-OV	Primary Tumor	6.33502
260	s17969	TCGA-OV	Primary Tumor	6.37307
261	s17956	TCGA-OV	Primary Tumor	7.04672
262	s17925	TCGA-OV	Primary Tumor	6.21734
263	s17933	TCGA-OV	Primary Tumor	6.44684
264	s17961	TCGA-OV	Blood Derived Normal	6.83134
265	s17935	TCGA-OV	Primary Tumor	6.53028
266	s17947	TCGA-OV	Primary Tumor	5.70776
267	s17897	TCGA-OV	Primary Tumor	6.31137
268	s17929	TCGA-OV	Primary Tumor	5.37719
269	s17975	TCGA-OV	Primary Tumor	5.09133
270	s17943	TCGA-OV	Primary Tumor	6.65786
271	s17977	TCGA-OV	Primary Tumor	5.84908
272	s17974	TCGA-OV	Primary Tumor	6.13836
273	s17911	TCGA-OV	Primary Tumor	6.88564
274	s17891	TCGA-OV	Primary Tumor	6.37952
275	s17938	TCGA-OV	Primary Tumor	7.13376
276	s17970	TCGA-OV	Primary Tumor	6.50364
277	s17953	TCGA-OV	Primary Tumor	6.48309
278	s17914	TCGA-OV	Primary Tumor	9.95227
279	s17898	TCGA-OV	Primary Tumor	7.50459
280	s17965	TCGA-OV	Primary Tumor	5.18344
281	s17912	TCGA-OV	Primary Tumor	5.59097
282	s17903	TCGA-OV	Primary Tumor	6.45977
283	s17900	TCGA-OV	Primary Tumor	5.729
284	s17934	TCGA-OV	Primary Tumor	6.52527
285	s17936	TCGA-OV	Primary Tumor	6.25776
286	s17892	TCGA-OV	Primary Tumor	5.9933
287	s17966	TCGA-OV	Primary Tumor	6.61673
288	s17944	TCGA-OV	Primary Tumor	5.96755
289	s17889	TCGA-OV	Primary Tumor	6.32065
290	s17973	TCGA-OV	Primary Tumor	5.78531
291	s17913	TCGA-OV	Primary Tumor	7.60501
292	s17952	TCGA-OV	Primary Tumor	6.05062
293	s17921	TCGA-OV	Primary Tumor	7.64936
294	s17907	TCGA-OV	Primary Tumor	6.9739
295	s17946	TCGA-OV	Primary Tumor	7.00081
296	s17926	TCGA-OV	Primary Tumor	6.78378
297	s17948	TCGA-OV	Primary Tumor	6.21304
298	s17927	TCGA-OV	Primary Tumor	6.52564
299	s17963	TCGA-OV	Primary Tumor	5.56304
300	s17937	TCGA-OV	Primary Tumor	6.31078
301	s17971	TCGA-OV	Primary Tumor	5.10397
302	s17945	TCGA-OV	Primary Tumor	6.01264
303	s17905	TCGA-OV	Primary Tumor	6.18703
304	s17928	TCGA-OV	Primary Tumor	6.64875
305	s17896	TCGA-OV	Primary Tumor	6.40294
306	s17967	TCGA-OV	Primary Tumor	6.52637
307	s17890	TCGA-OV	Primary Tumor	7.01607
308	s17908	TCGA-OV	Primary Tumor	6.38012
309	s17968	TCGA-OV	Primary Tumor	5.7109
310	s17894	TCGA-OV	Primary Tumor	6.35416
311	s17918	TCGA-OV	Primary Tumor	7.56721
312	s17931	TCGA-OV	Primary Tumor	5.87268
313	s17932	TCGA-OV	Primary Tumor	6.57889
314	s17915	TCGA-OV	Primary Tumor	6.56747
315	s17899	TCGA-OV	Solid Tissue Normal	5.97826
316	s17922	TCGA-OV	Primary Tumor	5.48336
317	s17962	TCGA-OV	Primary Tumor	6.50397
318	s17901	TCGA-OV	Primary Tumor	6.13658
319	s17957	TCGA-OV	Primary Tumor	6.78008
320	s17919	TCGA-OV	Primary Tumor	6.7595
321	s17964	TCGA-OV	Primary Tumor	6.77462
322	s17930	TCGA-OV	Primary Tumor	7.41494
323	s17325	TCGA-OV	Primary Tumor	7.23947
324	s17331	TCGA-OV	Primary Tumor	7.10575
325	s17343	TCGA-OV	Primary Tumor	6.44453
326	s17328	TCGA-OV	Primary Tumor	6.69902
327	s17341	TCGA-OV	Primary Tumor	7.1941
328	s17342	TCGA-OV	Primary Tumor	7.30006
329	s17338	TCGA-OV	Primary Tumor	7.06245
330	s17333	TCGA-OV	Primary Tumor	5.74887
331	s17329	TCGA-OV	Primary Tumor	7.17963
332	s17324	TCGA-OV	Primary Tumor	6.72815
333	s17344	TCGA-OV	Blood Derived Normal	7.33486
334	s17335	TCGA-OV	Primary Tumor	6.2431
335	s17332	TCGA-OV	Primary Tumor	7.20837
336	s17326	TCGA-OV	Primary Tumor	6.0069
337	s17346	TCGA-OV	Primary Tumor	6.13433
338	s17336	TCGA-OV	Primary Tumor	6.54941
339	s17323	TCGA-OV	Solid Tissue Normal	4.96987
340	s17340	TCGA-OV	Primary Tumor	6.92488
341	s17347	TCGA-OV	Primary Tumor	5.97484
342	s17557	TCGA-OV	Primary Tumor	7.71066
343	s17547	TCGA-OV	Blood Derived Normal	5.61933
344	s17570	TCGA-OV	Primary Tumor	6.44101
345	s17581	TCGA-OV	Primary Tumor	5.51935
346	s17584	TCGA-OV	Primary Tumor	6.12475
347	s17585	TCGA-OV	Primary Tumor	5.37025
348	s17580	TCGA-OV	Primary Tumor	6.29004
349	s17571	TCGA-OV	Primary Tumor	6.35742
350	s17561	TCGA-OV	Primary Tumor	6.27268
351	s17554	TCGA-OV	Primary Tumor	6.14392
352	s17569	TCGA-OV	Primary Tumor	7.05205
353	s17573	TCGA-OV	Primary Tumor	5.26972
354	s17550	TCGA-OV	Primary Tumor	6.22921
355	s17583	TCGA-OV	Primary Tumor	5.50899
356	s17578	TCGA-OV	Primary Tumor	7.48634
357	s17565	TCGA-OV	Primary Tumor	6.04851
358	s17549	TCGA-OV	Blood Derived Normal	5.76212
359	s17577	TCGA-OV	Primary Tumor	6.76603
360	s17551	TCGA-OV	Blood Derived Normal	6.09796
361	s17567	TCGA-OV	Primary Tumor	6.89686
362	s17576	TCGA-OV	Primary Tumor	6.53969
363	s17579	TCGA-OV	Blood Derived Normal	6.61807
364	s17568	TCGA-OV	Primary Tumor	7.40607
365	s17572	TCGA-OV	Primary Tumor	5.76811
366	s17586	TCGA-OV	Blood Derived Normal	3.9287
367	s17548	TCGA-OV	Blood Derived Normal	5.75029
368	s17560	TCGA-OV	Primary Tumor	6.65286
369	s17558	TCGA-OV	Blood Derived Normal	6.94202
370	s17556	TCGA-OV	Primary Tumor	6.64775
371	s17574	TCGA-OV	Primary Tumor	6.27205
372	s17575	TCGA-OV	Primary Tumor	5.95631
373	s17564	TCGA-OV	Primary Tumor	6.00733
374	s17582	TCGA-OV	Primary Tumor	7.15566
375	s17552	TCGA-OV	Primary Tumor	6.41022
376	s17559	TCGA-OV	Primary Tumor	6.29464
377	s17566	TCGA-OV	Primary Tumor	6.6182
378	s17664	TCGA-OV	Primary Tumor	6.22347
379	s17698	TCGA-OV	Primary Tumor	5.5265
380	s17663	TCGA-OV	Primary Tumor	6.55087
381	s17670	TCGA-OV	Primary Tumor	6.1172
382	s17672	TCGA-OV	Primary Tumor	5.80372
383	s17690	TCGA-OV	Primary Tumor	6.46305
384	s17656	TCGA-OV	Primary Tumor	7.34696
385	s17654	TCGA-OV	Primary Tumor	5.8478
386	s17653	TCGA-OV	Primary Tumor	6.48334
387	s17679	TCGA-OV	Primary Tumor	6.59838
388	s17673	TCGA-OV	Blood Derived Normal	5.90233
389	s17665	TCGA-OV	Primary Tumor	5.95655
390	s17702	TCGA-OV	Primary Tumor	6.37172
391	s17677	TCGA-OV	Blood Derived Normal	5.67832
392	s17657	TCGA-OV	Primary Tumor	5.85593
393	s17668	TCGA-OV	Primary Tumor	7.18853
394	s17678	TCGA-OV	Primary Tumor	7.42593
395	s17675	TCGA-OV	Primary Tumor	6.02959
396	s17682	TCGA-OV	Primary Tumor	6.49881
397	s17691	TCGA-OV	Primary Tumor	6.07817
398	s17661	TCGA-OV	Primary Tumor	5.391
399	s17652	TCGA-OV	Blood Derived Normal	7.66429
400	s17674	TCGA-OV	Primary Tumor	6.5304
401	s17686	TCGA-OV	Primary Tumor	6.39565
402	s17659	TCGA-OV	Primary Tumor	4.31992
403	s17692	TCGA-OV	Primary Tumor	5.77612
404	s17687	TCGA-OV	Primary Tumor	6.49113
405	s17685	TCGA-OV	Primary Tumor	5.70648
406	s17671	TCGA-OV	Primary Tumor	6.01049
407	s17666	TCGA-OV	Primary Tumor	5.9841
408	s17700	TCGA-OV	Primary Tumor	5.66097
409	s17669	TCGA-OV	Primary Tumor	6.63354
410	s17704	TCGA-OV	Primary Tumor	6.01295
411	s17660	TCGA-OV	Primary Tumor	6.65593
412	s17688	TCGA-OV	Primary Tumor	7.41657
413	s17693	TCGA-OV	Primary Tumor	7.01702
414	s17701	TCGA-OV	Solid Tissue Normal	7.13126
415	s17683	TCGA-OV	Primary Tumor	6.8054
416	s17676	TCGA-OV	Primary Tumor	6.21285
417	s17697	TCGA-OV	Primary Tumor	6.1877
418	s17658	TCGA-OV	Primary Tumor	7.1664
419	s17655	TCGA-OV	Primary Tumor	6.21981
420	s17699	TCGA-OV	Primary Tumor	5.5077
421	s17680	TCGA-OV	Primary Tumor	5.69814
422	s17694	TCGA-OV	Primary Tumor	5.54527
423	s17662	TCGA-OV	Primary Tumor	7.57431
424	s17695	TCGA-OV	Primary Tumor	6.79991
425	s17667	TCGA-OV	Primary Tumor	7.43226
426	s17684	TCGA-OV	Primary Tumor	6.75256
427	s17705	TCGA-OV	Primary Tumor	5.71382
428	s17681	TCGA-OV	Primary Tumor	6.00092
429	s17696	TCGA-OV	Primary Tumor	7.53312
430	s18083	TCGA-OV	Blood Derived Normal	4.81932
431	s18108	TCGA-OV	Primary Tumor	7.39843
432	s18137	TCGA-OV	Primary Tumor	6.54019
433	s18125	TCGA-OV	Primary Tumor	6.59194
434	s18119	TCGA-OV	Primary Tumor	6.27883
435	s18130	TCGA-OV	Primary Tumor	7.42234
436	s18116	TCGA-OV	Blood Derived Normal	6.00782
437	s18086	TCGA-OV	Blood Derived Normal	5.49409
438	s18111	TCGA-OV	Primary Tumor	6.40942
439	s18114	TCGA-OV	Primary Tumor	8.20186
440	s18102	TCGA-OV	Primary Tumor	6.68608
441	s18093	TCGA-OV	Primary Tumor	6.66215
442	s18132	TCGA-OV	Primary Tumor	6.62955
443	s18131	TCGA-OV	Blood Derived Normal	6.10538
444	s18140	TCGA-OV	Primary Tumor	6.1975
445	s18099	TCGA-OV	Primary Tumor	7.14319
446	s18144	TCGA-OV	Primary Tumor	5.84047
447	s18088	TCGA-OV	Primary Tumor	7.05677
448	s18112	TCGA-OV	Primary Tumor	7.64484
449	s18090	TCGA-OV	Primary Tumor	6.11625
450	s18136	TCGA-OV	Primary Tumor	5.40691
451	s18107	TCGA-OV	Primary Tumor	7.24856
452	s18129	TCGA-OV	Primary Tumor	7.08025
453	s18084	TCGA-OV	Primary Tumor	5.49458
454	s18139	TCGA-OV	Primary Tumor	5.57161
455	s18123	TCGA-OV	Primary Tumor	6.48701
456	s18138	TCGA-OV	Primary Tumor	5.42105
457	s18143	TCGA-OV	Primary Tumor	6.27057
458	s18121	TCGA-OV	Primary Tumor	6.15482
459	s18091	TCGA-OV	Primary Tumor	5.47595
460	s18128	TCGA-OV	Primary Tumor	7.09035
461	s18127	TCGA-OV	Primary Tumor	6.13967
462	s18122	TCGA-OV	Primary Tumor	6.44489
463	s18135	TCGA-OV	Primary Tumor	5.44816
464	s18126	TCGA-OV	Primary Tumor	6.7515
465	s18118	TCGA-OV	Primary Tumor	5.89808
466	s18145	TCGA-OV	Primary Tumor	5.64048
467	s18101	TCGA-OV	Primary Tumor	6.47463
468	s18113	TCGA-OV	Primary Tumor	6.45627
469	s18133	TCGA-OV	Primary Tumor	6.55706
470	s18142	TCGA-OV	Primary Tumor	5.74864
471	s18124	TCGA-OV	Primary Tumor	6.77494
472	s18094	TCGA-OV	Primary Tumor	6.24182
473	s18134	TCGA-OV	Primary Tumor	5.47764
474	s18106	TCGA-OV	Primary Tumor	7.37395
475	s18110	TCGA-OV	Primary Tumor	7.03401
476	s18141	TCGA-OV	Primary Tumor	6.5442
477	s18100	TCGA-OV	Primary Tumor	6.57457
478	s18081	TCGA-OV	Primary Tumor	4.53871
479	s18146	TCGA-OV	Primary Tumor	6.33347
480	s18120	TCGA-OV	Primary Tumor	6.1352
481	s18115	TCGA-OV	Primary Tumor	5.89595
482	s18105	TCGA-OV	Primary Tumor	7.2556
483	s18085	TCGA-OV	Primary Tumor	5.45188
484	s18096	TCGA-OV	Primary Tumor	5.09948
485	s18109	TCGA-OV	Primary Tumor	6.27225
486	s18095	TCGA-OV	Primary Tumor	6.28065
487	s18089	TCGA-OV	Blood Derived Normal	3.98702
488	s18082	TCGA-OV	Primary Tumor	4.01268
489	s18097	TCGA-OV	Primary Tumor	7.65381
490	s18087	TCGA-OV	Primary Tumor	6.61792
491	s18098	TCGA-OV	Primary Tumor	6.19735
492	s18117	TCGA-OV	Primary Tumor	5.64381
493	s17211	TCGA-OV	Primary Tumor	7.22987
494	s17224	TCGA-OV	Primary Tumor	6.36299
495	s17264	TCGA-OV	Primary Tumor	6.28217
496	s17230	TCGA-OV	Primary Tumor	5.9467
497	s17260	TCGA-OV	Primary Tumor	6.95129
498	s17279	TCGA-OV	Primary Tumor	6.09102
499	s17209	TCGA-OV	Primary Tumor	7.12878
500	s17266	TCGA-OV	Primary Tumor	5.06716
501	s17275	TCGA-OV	Primary Tumor	6.24673
502	s17270	TCGA-OV	Primary Tumor	6.96629
503	s17263	TCGA-OV	Primary Tumor	6.84996
504	s17204	TCGA-OV	Blood Derived Normal	6.40172
505	s17267	TCGA-OV	Primary Tumor	6.6011
506	s17248	TCGA-OV	Primary Tumor	6.09925
507	s17236	TCGA-OV	Primary Tumor	6.47463
508	s17232	TCGA-OV	Primary Tumor	6.57645
509	s17239	TCGA-OV	Primary Tumor	6.8273
510	s17262	TCGA-OV	Primary Tumor	11.3667
511	s17272	TCGA-OV	Primary Tumor	6.71195
512	s17258	TCGA-OV	Primary Tumor	6.21641
513	s17227	TCGA-OV	Primary Tumor	6.95048
514	s17234	TCGA-OV	Primary Tumor	6.68405
515	s17208	TCGA-OV	Primary Tumor	6.56187
516	s17276	TCGA-OV	Primary Tumor	5.95398
517	s17250	TCGA-OV	Primary Tumor	5.75292
518	s17219	TCGA-OV	Primary Tumor	6.75357
519	s17205	TCGA-OV	Solid Tissue Normal	5.72971
520	s17217	TCGA-OV	Primary Tumor	6.29117
521	s17243	TCGA-OV	Primary Tumor	7.14747
522	s17252	TCGA-OV	Primary Tumor	6.07703
523	s17271	TCGA-OV	Primary Tumor	5.98781
524	s17223	TCGA-OV	Primary Tumor	5.8382
525	s17226	TCGA-OV	Primary Tumor	6.02715
526	s17257	TCGA-OV	Primary Tumor	7.57407
527	s17207	TCGA-OV	Solid Tissue Normal	5.45559
528	s17259	TCGA-OV	Primary Tumor	6.68625
529	s17237	TCGA-OV	Primary Tumor	6.10506
530	s17241	TCGA-OV	Primary Tumor	6.79253
531	s17240	TCGA-OV	Primary Tumor	5.92598
532	s17242	TCGA-OV	Primary Tumor	6.63001
533	s17216	TCGA-OV	Primary Tumor	5.40825
534	s17249	TCGA-OV	Primary Tumor	5.87395
535	s17233	TCGA-OV	Primary Tumor	6.59721
536	s17255	TCGA-OV	Primary Tumor	6.62118
537	s17213	TCGA-OV	Primary Tumor	6.42545
538	s17268	TCGA-OV	Primary Tumor	6.73322
539	s17244	TCGA-OV	Primary Tumor	6.02941
540	s17269	TCGA-OV	Primary Tumor	6.65211
541	s17254	TCGA-OV	Primary Tumor	6.62182
542	s17212	TCGA-OV	Primary Tumor	6.24201
543	s17206	TCGA-OV	Primary Tumor	7.22998
544	s17214	TCGA-OV	Primary Tumor	5.27583
545	s17278	TCGA-OV	Primary Tumor	5.22657
546	s17229	TCGA-OV	Primary Tumor	5.48518
547	s17274	TCGA-OV	Primary Tumor	6.32327
548	s17218	TCGA-OV	Primary Tumor	7.46493
549	s17225	TCGA-OV	Primary Tumor	5.69873
550	s17221	TCGA-OV	Primary Tumor	6.31854
551	s17256	TCGA-OV	Primary Tumor	6.70119
552	s17277	TCGA-OV	Primary Tumor	5.36764
553	s17210	TCGA-OV	Primary Tumor	6.43352
554	s17222	TCGA-OV	Primary Tumor	5.63663
555	s17247	TCGA-OV	Primary Tumor	7.05141
556	s17220	TCGA-OV	Primary Tumor	6.70554
557	s17246	TCGA-OV	Primary Tumor	6.47463
558	s17235	TCGA-OV	Primary Tumor	6.76379
559	s17231	TCGA-OV	Primary Tumor	6.52854
560	s17261	TCGA-OV	Primary Tumor	6.27755
561	s17215	TCGA-OV	Primary Tumor	7.44493
562	s17228	TCGA-OV	Primary Tumor	6.89935
563	s17203	TCGA-OV	Blood Derived Normal	6.6686
564	s17251	TCGA-OV	Primary Tumor	6.38672
565	s17238	TCGA-OV	Primary Tumor	6.53635
566	s17253	TCGA-OV	Primary Tumor	7.35894
567	s17273	TCGA-OV	Primary Tumor	6.78409
568	s17245	TCGA-OV	Primary Tumor	5.95189
569	s17855	TCGA-OV	Primary Tumor	5.78073
570	s17819	TCGA-OV	Primary Tumor	5.979
571	s17858	TCGA-OV	Primary Tumor	5.93244
572	s17800	TCGA-OV	Primary Tumor	6.66421
573	s17833	TCGA-OV	Primary Tumor	6.05224
574	s17840	TCGA-OV	Primary Tumor	7.26398
575	s17853	TCGA-OV	Primary Tumor	6.44159
576	s17850	TCGA-OV	Primary Tumor	6.27876
577	s17828	TCGA-OV	Primary Tumor	6.50299
578	s17845	TCGA-OV	Primary Tumor	6.98847
579	s17835	TCGA-OV	Primary Tumor	6.61526
580	s17814	TCGA-OV	Primary Tumor	6.63608
581	s17825	TCGA-OV	Primary Tumor	7.18473
582	s17826	TCGA-OV	Primary Tumor	6.29165
583	s17801	TCGA-OV	Primary Tumor	6.36644
584	s17812	TCGA-OV	Primary Tumor	6.03652
585	s17821	TCGA-OV	Primary Tumor	7.01069
586	s17816	TCGA-OV	Primary Tumor	5.92415
587	s17808	TCGA-OV	Primary Tumor	5.65278
588	s17822	TCGA-OV	Primary Tumor	5.70526
589	s17803	TCGA-OV	Primary Tumor	6.50016
590	s17844	TCGA-OV	Primary Tumor	7.10955
591	s17848	TCGA-OV	Primary Tumor	6.66913
592	s17810	TCGA-OV	Primary Tumor	6.66782
593	s17834	TCGA-OV	Primary Tumor	7.43665
594	s17837	TCGA-OV	Primary Tumor	6.1484
595	s17854	TCGA-OV	Primary Tumor	6.22326
596	s17852	TCGA-OV	Blood Derived Normal	5.9782
597	s17832	TCGA-OV	Primary Tumor	7.49507
598	s17829	TCGA-OV	Primary Tumor	6.15885
599	s17802	TCGA-OV	Primary Tumor	6.06412
600	s17859	TCGA-OV	Primary Tumor	6.00998
601	s17841	TCGA-OV	Primary Tumor	6.10096
602	s17827	TCGA-OV	Primary Tumor	6.54129
603	s17857	TCGA-OV	Primary Tumor	6.5391
604	s17820	TCGA-OV	Primary Tumor	6.96879
605	s17804	TCGA-OV	Primary Tumor	5.37312
606	s17851	TCGA-OV	Primary Tumor	5.76057
607	s17818	TCGA-OV	Primary Tumor	5.98993
608	s17847	TCGA-OV	Primary Tumor	6.39071
609	s17849	TCGA-OV	Primary Tumor	6.12009
610	s17830	TCGA-OV	Primary Tumor	5.96126
611	s17807	TCGA-OV	Primary Tumor	6.32965
612	s17843	TCGA-OV	Primary Tumor	6.79744
613	s17809	TCGA-OV	Primary Tumor	6.32438
614	s17846	TCGA-OV	Primary Tumor	6.88767
615	s17815	TCGA-OV	Primary Tumor	5.95551
616	s17831	TCGA-OV	Primary Tumor	6.87218
617	s17824	TCGA-OV	Primary Tumor	7.70645
618	s17805	TCGA-OV	Primary Tumor	6.93385
619	s17839	TCGA-OV	Primary Tumor	6.02984
620	s17811	TCGA-OV	Primary Tumor	6.90007
621	s17813	TCGA-OV	Primary Tumor	7.19583
622	s17842	TCGA-OV	Blood Derived Normal	5.55337
623	s17823	TCGA-OV	Primary Tumor	7.16337
624	s17838	TCGA-OV	Primary Tumor	8.36597
625	s17856	TCGA-OV	Primary Tumor	6.22858
626	s17806	TCGA-OV	Primary Tumor	6.60674
627	s17860	TCGA-OV	Primary Tumor	6.36395
628	s17425	TCGA-OV	Primary Tumor	5.85947
629	s17471	TCGA-OV	Primary Tumor	5.73058
630	s17474	TCGA-OV	Primary Tumor	5.3578
631	s17413	TCGA-OV	Primary Tumor	7.0727
632	s17455	TCGA-OV	Primary Tumor	6.69307
633	s17445	TCGA-OV	Primary Tumor	5.86431
634	s17430	TCGA-OV	Primary Tumor	6.11315
635	s17427	TCGA-OV	Primary Tumor	5.87855
636	s17447	TCGA-OV	Primary Tumor	6.88139
637	s17466	TCGA-OV	Primary Tumor	6.4691
638	s17433	TCGA-OV	Primary Tumor	6.50859
639	s17419	TCGA-OV	Primary Tumor	5.82231
640	s17424	TCGA-OV	Primary Tumor	7.32635
641	s17408	TCGA-OV	Blood Derived Normal	6.15653
642	s17467	TCGA-OV	Primary Tumor	6.03798
643	s17416	TCGA-OV	Primary Tumor	6.87689
644	s17428	TCGA-OV	Primary Tumor	6.97239
645	s17420	TCGA-OV	Primary Tumor	7.6897
646	s17469	TCGA-OV	Primary Tumor	5.6339
647	s17453	TCGA-OV	Blood Derived Normal	5.83376
648	s17462	TCGA-OV	Primary Tumor	6.66523
649	s17457	TCGA-OV	Primary Tumor	6.3106
650	s17477	TCGA-OV	Primary Tumor	6.04472
651	s17438	TCGA-OV	Primary Tumor	7.15517
652	s17429	TCGA-OV	Primary Tumor	6.14183
653	s17468	TCGA-OV	Primary Tumor	6.44499
654	s17405	TCGA-OV	Primary Tumor	5.01912
655	s17449	TCGA-OV	Primary Tumor	6.4269
656	s17475	TCGA-OV	Primary Tumor	5.55391
657	s17406	TCGA-OV	Primary Tumor	6.68147
658	s17421	TCGA-OV	Primary Tumor	6.93072
659	s17434	TCGA-OV	Primary Tumor	6.38783
660	s17465	TCGA-OV	Primary Tumor	6.49971
661	s17443	TCGA-OV	Primary Tumor	7.13425
662	s17476	TCGA-OV	Primary Tumor	5.39943
663	s17410	TCGA-OV	Blood Derived Normal	6.0188
664	s17461	TCGA-OV	Primary Tumor	6.65256
665	s17432	TCGA-OV	Primary Tumor	6.00015
666	s17442	TCGA-OV	Primary Tumor	8.0967
667	s17440	TCGA-OV	Primary Tumor	6.93447
668	s17422	TCGA-OV	Primary Tumor	7.00206
669	s17451	TCGA-OV	Primary Tumor	7.2708
670	s17409	TCGA-OV	Primary Tumor	6.08706
671	s17431	TCGA-OV	Primary Tumor	6.5903
672	s17417	TCGA-OV	Primary Tumor	6.04609
673	s17423	TCGA-OV	Primary Tumor	6.72583
674	s17464	TCGA-OV	Primary Tumor	6.69959
675	s17460	TCGA-OV	Primary Tumor	5.68657
676	s17452	TCGA-OV	Primary Tumor	6.22221
677	s17437	TCGA-OV	Primary Tumor	6.14441
678	s17412	TCGA-OV	Primary Tumor	6.30217
679	s17439	TCGA-OV	Primary Tumor	5.47442
680	s17454	TCGA-OV	Primary Tumor	6.87547
681	s17472	TCGA-OV	Primary Tumor	6.11547
682	s17470	TCGA-OV	Primary Tumor	5.87915
683	s17414	TCGA-OV	Primary Tumor	6.60975
684	s17456	TCGA-OV	Primary Tumor	7.54242
685	s17448	TCGA-OV	Primary Tumor	5.89846
686	s17407	TCGA-OV	Blood Derived Normal	6.40944
687	s17435	TCGA-OV	Primary Tumor	6.56848
688	s17426	TCGA-OV	Primary Tumor	6.20897
689	s17436	TCGA-OV	Primary Tumor	6.35576
690	s17441	TCGA-OV	Primary Tumor	6.14044
691	s17458	TCGA-OV	Primary Tumor	5.39475
692	s17444	TCGA-OV	Primary Tumor	6.8727
693	s17411	TCGA-OV	Primary Tumor	7.24263
694	s17415	TCGA-OV	Primary Tumor	7.26015
695	s17418	TCGA-OV	Primary Tumor	6.37708
696	s17446	TCGA-OV	Primary Tumor	5.86951
697	s17450	TCGA-OV	Primary Tumor	7.18165
698	s17463	TCGA-OV	Primary Tumor	5.61532
699	s17629	TCGA-OV	Primary Tumor	7.22651
700	s17615	TCGA-OV	Primary Tumor	6.15632
701	s17605	TCGA-OV	Primary Tumor	5.65138
702	s17637	TCGA-OV	Primary Tumor	6.75873
703	s17625	TCGA-OV	Primary Tumor	5.81533
704	s17620	TCGA-OV	Primary Tumor	5.65091
705	s17631	TCGA-OV	Primary Tumor	6.97664
706	s17607	TCGA-OV	Primary Tumor	5.8068
707	s17642	TCGA-OV	Primary Tumor	6.15997
708	s17614	TCGA-OV	Blood Derived Normal	5.12925
709	s17612	TCGA-OV	Primary Tumor	6.49091
710	s17651	TCGA-OV	Primary Tumor	5.89278
711	s17617	TCGA-OV	Primary Tumor	5.88001
712	s17610	TCGA-OV	Blood Derived Normal	5.72927
713	s17626	TCGA-OV	Primary Tumor	6.85207
714	s17644	TCGA-OV	Primary Tumor	6.0756
715	s17622	TCGA-OV	Primary Tumor	6.16225
716	s17616	TCGA-OV	Primary Tumor	6.10939
717	s17598	TCGA-OV	Primary Tumor	6.07939
718	s17623	TCGA-OV	Primary Tumor	6.8052
719	s17613	TCGA-OV	Primary Tumor	7.22456
720	s17600	TCGA-OV	Solid Tissue Normal	4.61036
721	s17591	TCGA-OV	Primary Tumor	6.48165
722	s17588	TCGA-OV	Solid Tissue Normal	5.04392
723	s17608	TCGA-OV	Primary Tumor	5.83724
724	s17609	TCGA-OV	Primary Tumor	6.50231
725	s17635	TCGA-OV	Primary Tumor	7.068
726	s17589	TCGA-OV	Blood Derived Normal	6.59095
727	s17603	TCGA-OV	Primary Tumor	5.65028
728	s17611	TCGA-OV	Primary Tumor	6.40752
729	s17602	TCGA-OV	Primary Tumor	6.1432
730	s17628	TCGA-OV	Primary Tumor	6.95219
731	s17648	TCGA-OV	Primary Tumor	6.05982
732	s17634	TCGA-OV	Primary Tumor	5.95026
733	s17640	TCGA-OV	Primary Tumor	5.4985
734	s17636	TCGA-OV	Primary Tumor	6.14572
735	s17606	TCGA-OV	Primary Tumor	7.25457
736	s17599	TCGA-OV	Primary Tumor	6.15365
737	s17597	TCGA-OV	Primary Tumor	6.9356
738	s17595	TCGA-OV	Primary Tumor	6.59097
739	s17630	TCGA-OV	Primary Tumor	7.1691
740	s17639	TCGA-OV	Primary Tumor	6.07003
741	s17638	TCGA-OV	Primary Tumor	5.89645
742	s17650	TCGA-OV	Primary Tumor	6.32901
743	s17649	TCGA-OV	Primary Tumor	5.57401
744	s17647	TCGA-OV	Primary Tumor	6.26189
745	s17624	TCGA-OV	Primary Tumor	6.69832
746	s17641	TCGA-OV	Primary Tumor	6.51505
747	s17596	TCGA-OV	Primary Tumor	6.3929
748	s17590	TCGA-OV	Primary Tumor	5.89198
749	s17601	TCGA-OV	Primary Tumor	6.87375
750	s17627	TCGA-OV	Primary Tumor	6.1629
751	s17646	TCGA-OV	Primary Tumor	5.97184
752	s17633	TCGA-OV	Primary Tumor	6.20195
753	s17592	TCGA-OV	Primary Tumor	7.2331
754	s17587	TCGA-OV	Primary Tumor	5.62365
755	s17593	TCGA-OV	Primary Tumor	6.69957
756	s17618	TCGA-OV	Primary Tumor	7.28938
757	s17643	TCGA-OV	Primary Tumor	6.34261
758	s17632	TCGA-OV	Primary Tumor	6.50141
759	s17621	TCGA-OV	Primary Tumor	6.93953
760	s17619	TCGA-OV	Primary Tumor	6.6822
761	s17594	TCGA-OV	Primary Tumor	5.39375
762	s17764	TCGA-OV	Primary Tumor	7.12973
763	s17793	TCGA-OV	Primary Tumor	5.02443
764	s17787	TCGA-OV	Primary Tumor	6.35592
765	s17777	TCGA-OV	Primary Tumor	6.33733
766	s17791	TCGA-OV	Primary Tumor	6.27971
767	s17780	TCGA-OV	Primary Tumor	6.45262
768	s17762	TCGA-OV	Primary Tumor	6.91495
769	s17766	TCGA-OV	Primary Tumor	5.55048
770	s17790	TCGA-OV	Primary Tumor	6.15378
771	s17799	TCGA-OV	Primary Tumor	7.53666
772	s17792	TCGA-OV	Primary Tumor	7.02748
773	s17779	TCGA-OV	Primary Tumor	6.53564
774	s17778	TCGA-OV	Primary Tumor	6.76689
775	s17798	TCGA-OV	Primary Tumor	4.83274
776	s17774	TCGA-OV	Primary Tumor	7.00502
777	s17763	TCGA-OV	Primary Tumor	5.92431
778	s17781	TCGA-OV	Primary Tumor	7.61641
779	s17784	TCGA-OV	Primary Tumor	6.21473
780	s17783	TCGA-OV	Blood Derived Normal	5.96009
781	s17794	TCGA-OV	Primary Tumor	5.54235
782	s17771	TCGA-OV	Primary Tumor	7.66843
783	s17788	TCGA-OV	Primary Tumor	7.39322
784	s17773	TCGA-OV	Primary Tumor	5.94873
785	s17797	TCGA-OV	Primary Tumor	5.70044
786	s17765	TCGA-OV	Primary Tumor	7.2163
787	s17775	TCGA-OV	Primary Tumor	6.10706
788	s17767	TCGA-OV	Primary Tumor	6.04118
789	s17768	TCGA-OV	Primary Tumor	6.348
790	s17769	TCGA-OV	Primary Tumor	7.48147
791	s17795	TCGA-OV	Primary Tumor	6.29986
792	s17776	TCGA-OV	Primary Tumor	5.65677
793	s17796	TCGA-OV	Solid Tissue Normal	5.55116
794	s17772	TCGA-OV	Primary Tumor	6.25926
795	s17760	TCGA-OV	Primary Tumor	6.33041
796	s17786	TCGA-OV	Primary Tumor	7.56601
797	s17761	TCGA-OV	Primary Tumor	6.4702
798	s17789	TCGA-OV	Primary Tumor	6.68465
799	s17782	TCGA-OV	Primary Tumor	6.45126
800	s17785	TCGA-OV	Primary Tumor	7.15221
801	s18000	TCGA-OV	Primary Tumor	6.52758
802	s17982	TCGA-OV	Primary Tumor	6.28113
803	s17978	TCGA-OV	Primary Tumor	5.51633
804	s17989	TCGA-OV	Primary Tumor	6.1122
805	s18011	TCGA-OV	Primary Tumor	5.95974
806	s17993	TCGA-OV	Primary Tumor	11.9671
807	s17985	TCGA-OV	Primary Tumor	6.0162
808	s17980	TCGA-OV	Blood Derived Normal	4.89551
809	s17987	TCGA-OV	Primary Tumor	6.88743
810	s17979	TCGA-OV	Solid Tissue Normal	4.74888
811	s17990	TCGA-OV	Primary Tumor	6.5603
812	s18012	TCGA-OV	Primary Tumor	7.16204
813	s17996	TCGA-OV	Primary Tumor	6.43074
814	s18002	TCGA-OV	Primary Tumor	6.64865
815	s17994	TCGA-OV	Primary Tumor	5.77833
816	s17983	TCGA-OV	Primary Tumor	6.85593
817	s17998	TCGA-OV	Primary Tumor	6.54
818	s18005	TCGA-OV	Blood Derived Normal	5.89831
819	s17984	TCGA-OV	Primary Tumor	6.19838
820	s17992	TCGA-OV	Primary Tumor	6.24797
821	s17991	TCGA-OV	Primary Tumor	6.23664
822	s17995	TCGA-OV	Primary Tumor	6.66262
823	s18009	TCGA-OV	Primary Tumor	6.24101
824	s17981	TCGA-OV	Primary Tumor	6.86315
825	s18004	TCGA-OV	Primary Tumor	6.57801
826	s17988	TCGA-OV	Primary Tumor	6.20657
827	s18015	TCGA-OV	Solid Tissue Normal	5.50396
828	s17997	TCGA-OV	Primary Tumor	6.85551
829	s17999	TCGA-OV	Primary Tumor	6.9554
830	s18016	TCGA-OV	Primary Tumor	6.64094
831	s18013	TCGA-OV	Primary Tumor	5.91632
832	s18006	TCGA-OV	Primary Tumor	6.311
833	s18008	TCGA-OV	Primary Tumor	6.09791
834	s18010	TCGA-OV	Primary Tumor	6.38475
835	s18003	TCGA-OV	Primary Tumor	7.48662
836	s18001	TCGA-OV	Primary Tumor	7.07042
837	s17986	TCGA-OV	Primary Tumor	6.2554
838	s18014	TCGA-OV	Primary Tumor	6.57871
839	s18078	TCGA-OV	Primary Tumor	5.51269
840	s18066	TCGA-OV	Primary Tumor	5.78116
841	s18022	TCGA-OV	Primary Tumor	6.56519
842	s18054	TCGA-OV	Primary Tumor	7.63431
843	s18049	TCGA-OV	Primary Tumor	5.9984
844	s18074	TCGA-OV	Primary Tumor	6.48212
845	s18029	TCGA-OV	Primary Tumor	6.38438
846	s18037	TCGA-OV	Primary Tumor	6.95843
847	s18017	TCGA-OV	Blood Derived Normal	4.05096
848	s18059	TCGA-OV	Primary Tumor	5.92921
849	s18067	TCGA-OV	Primary Tumor	5.93049
850	s18025	TCGA-OV	Primary Tumor	6.45174
851	s18018	TCGA-OV	Blood Derived Normal	5.52343
852	s18019	TCGA-OV	Primary Tumor	6.36051
853	s18021	TCGA-OV	Primary Tumor	6.34048
854	s18050	TCGA-OV	Primary Tumor	6.47822
855	s18044	TCGA-OV	Primary Tumor	6.23953
856	s18051	TCGA-OV	Primary Tumor	6.35959
857	s18040	TCGA-OV	Primary Tumor	7.07431
858	s18077	TCGA-OV	Primary Tumor	5.69097
859	s18062	TCGA-OV	Primary Tumor	6.99471
860	s18057	TCGA-OV	Primary Tumor	6.83306
861	s18080	TCGA-OV	Primary Tumor	6.31887
862	s18027	TCGA-OV	Primary Tumor	6.47532
863	s18053	TCGA-OV	Primary Tumor	7.19981
864	s18026	TCGA-OV	Primary Tumor	6.44624
865	s18052	TCGA-OV	Primary Tumor	7.57179
866	s18030	TCGA-OV	Primary Tumor	6.17112
867	s18075	TCGA-OV	Primary Tumor	5.71076
868	s18041	TCGA-OV	Primary Tumor	5.68301
869	s18023	TCGA-OV	Primary Tumor	6.29648
870	s18031	TCGA-OV	Primary Tumor	6.48442
871	s18033	TCGA-OV	Primary Tumor	5.73859
872	s18034	TCGA-OV	Blood Derived Normal	5.32882
873	s18070	TCGA-OV	Primary Tumor	5.90541
874	s18076	TCGA-OV	Primary Tumor	5.8391
875	s18045	TCGA-OV	Primary Tumor	5.78747
876	s18064	TCGA-OV	Primary Tumor	6.91015
877	s18024	TCGA-OV	Primary Tumor	6.31057
878	s18073	TCGA-OV	Primary Tumor	6.71088
879	s18039	TCGA-OV	Primary Tumor	6.87555
880	s18079	TCGA-OV	Primary Tumor	5.63448
881	s18063	TCGA-OV	Primary Tumor	6.77796
882	s18020	TCGA-OV	Blood Derived Normal	6.33326
883	s18069	TCGA-OV	Primary Tumor	6.86836
884	s18058	TCGA-OV	Primary Tumor	11.19
885	s18028	TCGA-OV	Primary Tumor	6.24505
886	s18072	TCGA-OV	Primary Tumor	5.61574
887	s18068	TCGA-OV	Primary Tumor	6.42043
888	s18056	TCGA-OV	Primary Tumor	6.67359
889	s18038	TCGA-OV	Primary Tumor	6.33268
890	s18071	TCGA-OV	Primary Tumor	5.37142
891	s18047	TCGA-OV	Primary Tumor	6.77565
892	s18048	TCGA-OV	Primary Tumor	7.13695
893	s18046	TCGA-OV	Primary Tumor	6.34658
894	s18043	TCGA-OV	Primary Tumor	5.92472
895	s18036	TCGA-OV	Blood Derived Normal	5.49087
896	s18060	TCGA-OV	Primary Tumor	6.41534
897	s18042	TCGA-OV	Primary Tumor	7.24779
898	s18055	TCGA-OV	Blood Derived Normal	6.53948
899	s18032	TCGA-OV	Primary Tumor	6.38945
900	s18065	TCGA-OV	Primary Tumor	6.3698
901	s18149	TCGA-OV	Primary Tumor	6.24985
902	s18147	TCGA-OV	Blood Derived Normal	5.1972
903	s18150	TCGA-OV	Blood Derived Normal	4.2717
904	s18148	TCGA-OV	Primary Tumor	6.24659
905	s17182	TCGA-OV	Primary Tumor	6.89064
906	s17196	TCGA-OV	Primary Tumor	6.25908
907	s17197	TCGA-OV	Primary Tumor	6.38795
908	s17185	TCGA-OV	Primary Tumor	6.99043
909	s17170	TCGA-OV	Primary Tumor	5.75451
910	s17174	TCGA-OV	Primary Tumor	7.08964
911	s17183	TCGA-OV	Primary Tumor	6.02459
912	s17176	TCGA-OV	Primary Tumor	6.28182
913	s17202	TCGA-OV	Primary Tumor	6.07189
914	s17192	TCGA-OV	Primary Tumor	7.05961
915	s17167	TCGA-OV	Primary Tumor	6.00053
916	s17189	TCGA-OV	Primary Tumor	6.61136
917	s17190	TCGA-OV	Primary Tumor	6.55021
918	s17180	TCGA-OV	Primary Tumor	5.29723
919	s17194	TCGA-OV	Primary Tumor	6.53311
920	s17171	TCGA-OV	Primary Tumor	6.0649
921	s17168	TCGA-OV	Primary Tumor	5.86482
922	s17165	TCGA-OV	Primary Tumor	4.97001
923	s17191	TCGA-OV	Primary Tumor	7.54577
924	s17173	TCGA-OV	Primary Tumor	6.51745
925	s17188	TCGA-OV	Primary Tumor	6.25574
926	s17201	TCGA-OV	Primary Tumor	6.55719
927	s17177	TCGA-OV	Primary Tumor	6.44282
928	s17169	TCGA-OV	Primary Tumor	6.54733
929	s17187	TCGA-OV	Primary Tumor	6.28427
930	s17164	TCGA-OV	Primary Tumor	5.32766
931	s17184	TCGA-OV	Primary Tumor	6.49638
932	s17186	TCGA-OV	Primary Tumor	6.24564
933	s17199	TCGA-OV	Primary Tumor	5.1693
934	s17181	TCGA-OV	Primary Tumor	5.45171
935	s17179	TCGA-OV	Primary Tumor	7.21064
936	s17198	TCGA-OV	Primary Tumor	6.09787
937	s17193	TCGA-OV	Primary Tumor	5.92178
938	s17200	TCGA-OV	Primary Tumor	5.14709
939	s17166	TCGA-OV	Blood Derived Normal	6.29748
940	s17195	TCGA-OV	Primary Tumor	7.59794
941	s17384	TCGA-OV	Primary Tumor	5.98262
942	s17357	TCGA-OV	Primary Tumor	6.87878
943	s17360	TCGA-OV	Primary Tumor	6.58878
944	s17388	TCGA-OV	Primary Tumor	6.26619
945	s17394	TCGA-OV	Primary Tumor	6.88388
946	s17376	TCGA-OV	Primary Tumor	6.24087
947	s17367	TCGA-OV	Primary Tumor	6.89689
948	s17400	TCGA-OV	Primary Tumor	7.0274
949	s17373	TCGA-OV	Primary Tumor	5.98074
950	s17368	TCGA-OV	Primary Tumor	7.29147
951	s17359	TCGA-OV	Primary Tumor	5.97454
952	s17397	TCGA-OV	Primary Tumor	6.47647
953	s17358	TCGA-OV	Primary Tumor	6.12848
954	s17387	TCGA-OV	Primary Tumor	6.45019
955	s17365	TCGA-OV	Primary Tumor	6.15602
956	s17379	TCGA-OV	Primary Tumor	6.42601
957	s17354	TCGA-OV	Primary Tumor	6.80231
958	s17386	TCGA-OV	Primary Tumor	7.17106
959	s17362	TCGA-OV	Primary Tumor	7.24617
960	s17395	TCGA-OV	Blood Derived Normal	5.70546
961	s17401	TCGA-OV	Primary Tumor	5.06274
962	s17348	TCGA-OV	Blood Derived Normal	6.30609
963	s17366	TCGA-OV	Primary Tumor	7.31477
964	s17377	TCGA-OV	Primary Tumor	6.63619
965	s17361	TCGA-OV	Primary Tumor	6.5886
966	s17383	TCGA-OV	Primary Tumor	7.05638
967	s17385	TCGA-OV	Primary Tumor	6.01201
968	s17382	TCGA-OV	Primary Tumor	6.60332
969	s17375	TCGA-OV	Primary Tumor	5.91486
970	s17355	TCGA-OV	Primary Tumor	7.00871
971	s17390	TCGA-OV	Blood Derived Normal	5.30424
972	s17378	TCGA-OV	Primary Tumor	7.87777
973	s17389	TCGA-OV	Primary Tumor	6.48731
974	s17371	TCGA-OV	Primary Tumor	6.42911
975	s17372	TCGA-OV	Primary Tumor	7.14302
976	s17369	TCGA-OV	Primary Tumor	7.57709
977	s17404	TCGA-OV	Primary Tumor	5.62002
978	s17350	TCGA-OV	Primary Tumor	6.73883
979	s17352	TCGA-OV	Primary Tumor	5.36058
980	s17364	TCGA-OV	Primary Tumor	6.21462
981	s17403	TCGA-OV	Primary Tumor	5.93028
982	s17381	TCGA-OV	Primary Tumor	5.92777
983	s17363	TCGA-OV	Primary Tumor	6.03667
984	s17353	TCGA-OV	Primary Tumor	6.91411
985	s17402	TCGA-OV	Primary Tumor	5.9478
986	s17380	TCGA-OV	Primary Tumor	7.03925
987	s17356	TCGA-OV	Primary Tumor	7.70778
988	s17398	TCGA-OV	Primary Tumor	6.43828
989	s17349	TCGA-OV	Blood Derived Normal	6.6387
990	s17396	TCGA-OV	Primary Tumor	6.77079
991	s17399	TCGA-OV	Primary Tumor	6.32425
992	s17370	TCGA-OV	Primary Tumor	7.67921
993	s17374	TCGA-OV	Primary Tumor	6.03125
994	s17393	TCGA-OV	Primary Tumor	5.92192
995	s17351	TCGA-OV	Primary Tumor	5.86565
996	s16790	TCGA-LIHC	Primary Tumor	5.24525
997	s16818	TCGA-LIHC	Primary Tumor	5.8641
998	s16804	TCGA-LIHC	Primary Tumor	5.47352
999	s16846	TCGA-LIHC	Primary Tumor	5.64074
1000	s16788	TCGA-LIHC	Primary Tumor	6.6431
1001	s16825	TCGA-LIHC	Primary Tumor	5.72216
1002	s16806	TCGA-LIHC	Primary Tumor	7.15075
1003	s16773	TCGA-LIHC	Blood Derived Normal	5.8725
1004	s16785	TCGA-LIHC	Solid Tissue Normal	5.8623
1005	s16791	TCGA-LIHC	Blood Derived Normal	5.0975
1006	s16841	TCGA-LIHC	Primary Tumor	5.62145
1007	s16779	TCGA-LIHC	Solid Tissue Normal	6.55633
1008	s16774	TCGA-LIHC	Solid Tissue Normal	6.51734
1009	s16840	TCGA-LIHC	Primary Tumor	5.59096
1010	s16826	TCGA-LIHC	Primary Tumor	4.97739
1011	s16811	TCGA-LIHC	Primary Tumor	6.49274
1012	s16815	TCGA-LIHC	Primary Tumor	5.57369
1013	s16776	TCGA-LIHC	Primary Tumor	6.26199
1014	s16795	TCGA-LIHC	Solid Tissue Normal	5.76101
1015	s16830	TCGA-LIHC	Primary Tumor	5.53378
1016	s16798	TCGA-LIHC	Primary Tumor	5.25036
1017	s16796	TCGA-LIHC	Solid Tissue Normal	5.84964
1018	s16836	TCGA-LIHC	Primary Tumor	3.29593
1019	s16837	TCGA-LIHC	Primary Tumor	5.24725
1020	s16844	TCGA-LIHC	Primary Tumor	5.62177
1021	s16835	TCGA-LIHC	Primary Tumor	6.7172
1022	s16783	TCGA-LIHC	Primary Tumor	6.53956
1023	s16821	TCGA-LIHC	Primary Tumor	6.23811
1024	s16797	TCGA-LIHC	Solid Tissue Normal	6.24908
1025	s16778	TCGA-LIHC	Solid Tissue Normal	6.59229
1026	s16812	TCGA-LIHC	Primary Tumor	6.25922
1027	s16813	TCGA-LIHC	Primary Tumor	6.01585
1028	s16809	TCGA-LIHC	Primary Tumor	5.73947
1029	s16823	TCGA-LIHC	Primary Tumor	5.84996
1030	s16789	TCGA-LIHC	Primary Tumor	5.81295
1031	s16827	TCGA-LIHC	Primary Tumor	5.31658
1032	s16838	TCGA-LIHC	Primary Tumor	5.79614
1033	s16845	TCGA-LIHC	Primary Tumor	7.00519
1034	s16822	TCGA-LIHC	Primary Tumor	6.05354
1035	s16780	TCGA-LIHC	Solid Tissue Normal	6.54819
1036	s16805	TCGA-LIHC	Primary Tumor	5.8741
1037	s16777	TCGA-LIHC	Solid Tissue Normal	6.79339
1038	s16816	TCGA-LIHC	Primary Tumor	6.27115
1039	s16781	TCGA-LIHC	Primary Tumor	5.70789
1040	s16800	TCGA-LIHC	Solid Tissue Normal	5.88492
1041	s16829	TCGA-LIHC	Primary Tumor	5.77997
1042	s16828	TCGA-LIHC	Primary Tumor	4.93602
1043	s16810	TCGA-LIHC	Primary Tumor	5.72985
1044	s16786	TCGA-LIHC	Primary Tumor	6.11399
1045	s16801	TCGA-LIHC	Primary Tumor	5.89241
1046	s16843	TCGA-LIHC	Primary Tumor	5.7162
1047	s16807	TCGA-LIHC	Primary Tumor	6.07782
1048	s16803	TCGA-LIHC	Primary Tumor	6.01038
1049	s16819	TCGA-LIHC	Primary Tumor	5.46803
1050	s16793	TCGA-LIHC	Primary Tumor	8.06792
1051	s16794	TCGA-LIHC	Solid Tissue Normal	6.14041
1052	s16808	TCGA-LIHC	Primary Tumor	7.45299
1053	s16784	TCGA-LIHC	Primary Tumor	6.15017
1054	s16820	TCGA-LIHC	Primary Tumor	5.04364
1055	s16831	TCGA-LIHC	Primary Tumor	9.54137
1056	s16799	TCGA-LIHC	Primary Tumor	5.44478
1057	s16842	TCGA-LIHC	Primary Tumor	5.37971
1058	s16782	TCGA-LIHC	Blood Derived Normal	5.48775
1059	s16839	TCGA-LIHC	Primary Tumor	5.71411
1060	s16832	TCGA-LIHC	Primary Tumor	4.97457
1061	s16833	TCGA-LIHC	Primary Tumor	5.96443
1062	s16787	TCGA-LIHC	Primary Tumor	5.91858
1063	s16824	TCGA-LIHC	Primary Tumor	5.64461
1064	s16814	TCGA-LIHC	Primary Tumor	4.6649
1065	s16802	TCGA-LIHC	Solid Tissue Normal	6.98393
1066	s16775	TCGA-LIHC	Solid Tissue Normal	6.87718
1067	s16792	TCGA-LIHC	Primary Tumor	5.6452
1068	s16817	TCGA-LIHC	Primary Tumor	6.69661
1069	s16772	TCGA-LIHC	Blood Derived Normal	6.3893
1070	s16933	TCGA-LIHC	Primary Tumor	5.93227
1071	s16963	TCGA-LIHC	Primary Tumor	8.50794
1072	s16924	TCGA-LIHC	Primary Tumor	5.54018
1073	s16858	TCGA-LIHC	Blood Derived Normal	5.48601
1074	s16889	TCGA-LIHC	Primary Tumor	5.27944
1075	s16932	TCGA-LIHC	Primary Tumor	5.14165
1076	s16860	TCGA-LIHC	Blood Derived Normal	5.86105
1077	s16923	TCGA-LIHC	Primary Tumor	6.21963
1078	s16958	TCGA-LIHC	Primary Tumor	4.69249
1079	s16946	TCGA-LIHC	Primary Tumor	5.61829
1080	s16894	TCGA-LIHC	Primary Tumor	5.85903
1081	s16918	TCGA-LIHC	Primary Tumor	4.78102
1082	s16929	TCGA-LIHC	Primary Tumor	5.4203
1083	s16969	TCGA-LIHC	Primary Tumor	7.23695
1084	s16848	TCGA-LIHC	Primary Tumor	6.08101
1085	s16906	TCGA-LIHC	Primary Tumor	6.10497
1086	s16899	TCGA-LIHC	Primary Tumor	5.71205
1087	s16877	TCGA-LIHC	Solid Tissue Normal	5.66286
1088	s16902	TCGA-LIHC	Primary Tumor	6.17206
1089	s16870	TCGA-LIHC	Primary Tumor	6.03445
1090	s16920	TCGA-LIHC	Primary Tumor	5.63457
1091	s16966	TCGA-LIHC	Primary Tumor	6.55689
1092	s16917	TCGA-LIHC	Primary Tumor	5.65988
1093	s16919	TCGA-LIHC	Primary Tumor	4.58338
1094	s16930	TCGA-LIHC	Primary Tumor	7.9902
1095	s16941	TCGA-LIHC	Primary Tumor	4.09826
1096	s16849	TCGA-LIHC	Blood Derived Normal	6.16678
1097	s16868	TCGA-LIHC	Primary Tumor	5.5822
1098	s16862	TCGA-LIHC	Solid Tissue Normal	6.14664
1099	s16879	TCGA-LIHC	Primary Tumor	5.06318
1100	s16900	TCGA-LIHC	Primary Tumor	6.44773
1101	s16953	TCGA-LIHC	Primary Tumor	5.55706
1102	s16910	TCGA-LIHC	Primary Tumor	5.6065
1103	s16943	TCGA-LIHC	Primary Tumor	5.28239
1104	s16922	TCGA-LIHC	Primary Tumor	6.64871
1105	s16874	TCGA-LIHC	Primary Tumor	4.66919
1106	s16850	TCGA-LIHC	Primary Tumor	5.91986
1107	s16925	TCGA-LIHC	Primary Tumor	5.13047
1108	s16961	TCGA-LIHC	Primary Tumor	4.49598
1109	s16876	TCGA-LIHC	Primary Tumor	5.82919
1110	s16875	TCGA-LIHC	Solid Tissue Normal	7.33499
1111	s16904	TCGA-LIHC	Solid Tissue Normal	5.52863
1112	s16869	TCGA-LIHC	Primary Tumor	6.25523
1113	s16856	TCGA-LIHC	Primary Tumor	6.61563
1114	s16926	TCGA-LIHC	Primary Tumor	4.97918
1115	s16881	TCGA-LIHC	Primary Tumor	5.27712
1116	s16954	TCGA-LIHC	Primary Tumor	5.64576
1117	s16891	TCGA-LIHC	Primary Tumor	4.6165
1118	s16967	TCGA-LIHC	Primary Tumor	5.76288
1119	s16857	TCGA-LIHC	Primary Tumor	6.54724
1120	s16892	TCGA-LIHC	Primary Tumor	6.30086
1121	s16915	TCGA-LIHC	Primary Tumor	3.95236
1122	s16942	TCGA-LIHC	Primary Tumor	6.93285
1123	s16937	TCGA-LIHC	Primary Tumor	6.03238
1124	s16935	TCGA-LIHC	Primary Tumor	5.26646
1125	s16903	TCGA-LIHC	Primary Tumor	7.35158
1126	s16962	TCGA-LIHC	Primary Tumor	5.5469
1127	s16847	TCGA-LIHC	Blood Derived Normal	5.88715
1128	s16880	TCGA-LIHC	Primary Tumor	5.20528
1129	s16912	TCGA-LIHC	Primary Tumor	6.17018
1130	s16893	TCGA-LIHC	Primary Tumor	5.77293
1131	s16944	TCGA-LIHC	Primary Tumor	6.80796
1132	s16863	TCGA-LIHC	Blood Derived Normal	6.84311
1133	s16940	TCGA-LIHC	Primary Tumor	6.18232
1134	s16964	TCGA-LIHC	Primary Tumor	5.42304
1135	s16901	TCGA-LIHC	Primary Tumor	6.29522
1136	s16965	TCGA-LIHC	Primary Tumor	3.72629
1137	s16897	TCGA-LIHC	Primary Tumor	6.31322
1138	s16855	TCGA-LIHC	Primary Tumor	6.50199
1139	s16871	TCGA-LIHC	Primary Tumor	5.31155
1140	s16872	TCGA-LIHC	Primary Tumor	6.24326
1141	s16951	TCGA-LIHC	Primary Tumor	5.55547
1142	s16852	TCGA-LIHC	Primary Tumor	6.86852
1143	s16865	TCGA-LIHC	Primary Tumor	5.6723
1144	s16886	TCGA-LIHC	Solid Tissue Normal	6.12471
1145	s16948	TCGA-LIHC	Primary Tumor	5.60272
1146	s16907	TCGA-LIHC	Primary Tumor	6.36851
1147	s16959	TCGA-LIHC	Primary Tumor	5.92898
1148	s16960	TCGA-LIHC	Primary Tumor	5.1613
1149	s16864	TCGA-LIHC	Primary Tumor	6.07206
1150	s16945	TCGA-LIHC	Primary Tumor	6.26001
1151	s16861	TCGA-LIHC	Primary Tumor	6.00584
1152	s16887	TCGA-LIHC	Primary Tumor	5.92898
1153	s16949	TCGA-LIHC	Primary Tumor	6.54227
1154	s16908	TCGA-LIHC	Primary Tumor	5.75644
1155	s16905	TCGA-LIHC	Solid Tissue Normal	5.89927
1156	s16890	TCGA-LIHC	Solid Tissue Normal	4.60731
1157	s16867	TCGA-LIHC	Solid Tissue Normal	6.87219
1158	s16928	TCGA-LIHC	Primary Tumor	7.26173
1159	s16888	TCGA-LIHC	Primary Tumor	4.62832
1160	s16898	TCGA-LIHC	Primary Tumor	6.93497
1161	s16916	TCGA-LIHC	Primary Tumor	5.60299
1162	s16884	TCGA-LIHC	Primary Tumor	5.45245
1163	s16896	TCGA-LIHC	Solid Tissue Normal	6.57359
1164	s16956	TCGA-LIHC	Primary Tumor	4.5415
1165	s16853	TCGA-LIHC	Blood Derived Normal	6.31009
1166	s16950	TCGA-LIHC	Primary Tumor	6.05997
1167	s16909	TCGA-LIHC	Primary Tumor	4.60003
1168	s16927	TCGA-LIHC	Primary Tumor	6.42111
1169	s16885	TCGA-LIHC	Primary Tumor	7.10465
1170	s16914	TCGA-LIHC	Primary Tumor	6.72388
1171	s16859	TCGA-LIHC	Solid Tissue Normal	6.09462
1172	s16873	TCGA-LIHC	Primary Tumor	4.43753
1173	s16952	TCGA-LIHC	Primary Tumor	6.04715
1174	s16866	TCGA-LIHC	Solid Tissue Normal	5.69232
1175	s16936	TCGA-LIHC	Primary Tumor	6.7105
1176	s16913	TCGA-LIHC	Primary Tumor	3.36625
1177	s16939	TCGA-LIHC	Primary Tumor	5.89258
1178	s16911	TCGA-LIHC	Primary Tumor	6.61896
1179	s16854	TCGA-LIHC	Primary Tumor	6.83113
1180	s16968	TCGA-LIHC	Primary Tumor	6.37657
1181	s16883	TCGA-LIHC	Solid Tissue Normal	5.69256
1182	s16931	TCGA-LIHC	Primary Tumor	5.76335
1183	s16878	TCGA-LIHC	Solid Tissue Normal	9.4921
1184	s16882	TCGA-LIHC	Primary Tumor	6.60639
1185	s16851	TCGA-LIHC	Primary Tumor	5.95477
1186	s16947	TCGA-LIHC	Primary Tumor	4.83954
1187	s16895	TCGA-LIHC	Primary Tumor	4.7771
1188	s16655	TCGA-LIHC	Primary Tumor	3.28714
1189	s16636	TCGA-LIHC	Primary Tumor	5.37306
1190	s16584	TCGA-LIHC	Solid Tissue Normal	6.50657
1191	s16635	TCGA-LIHC	Primary Tumor	5.96247
1192	s16657	TCGA-LIHC	Primary Tumor	5.67261
1193	s16622	TCGA-LIHC	Primary Tumor	6.5003
1194	s16644	TCGA-LIHC	Primary Tumor	6.84113
1195	s16593	TCGA-LIHC	Primary Tumor	6.34205
1196	s16625	TCGA-LIHC	Primary Tumor	6.35485
1197	s16606	TCGA-LIHC	Primary Tumor	6.04021
1198	s16640	TCGA-LIHC	Primary Tumor	5.8508
1199	s16628	TCGA-LIHC	Primary Tumor	6.48162
1200	s16633	TCGA-LIHC	Primary Tumor	6.12187
1201	s16596	TCGA-LIHC	Solid Tissue Normal	6.46421
1202	s16602	TCGA-LIHC	Primary Tumor	7.03017
1203	s16592	TCGA-LIHC	Primary Tumor	5.96714
1204	s16634	TCGA-LIHC	Primary Tumor	6.29799
1205	s16667	TCGA-LIHC	Primary Tumor	6.54963
1206	s16654	TCGA-LIHC	Primary Tumor	6.20009
1207	s16639	TCGA-LIHC	Primary Tumor	4.11852
1208	s16641	TCGA-LIHC	Primary Tumor	5.76648
1209	s16601	TCGA-LIHC	Primary Tumor	4.26849
1210	s16630	TCGA-LIHC	Primary Tumor	2.21433
1211	s16669	TCGA-LIHC	Primary Tumor	6.70879
1212	s16580	TCGA-LIHC	Primary Tumor	6.63458
1213	s16666	TCGA-LIHC	Primary Tumor	4.31632
1214	s16645	TCGA-LIHC	Primary Tumor	6.02949
1215	s16620	TCGA-LIHC	Primary Tumor	6.00981
1216	s16618	TCGA-LIHC	Primary Tumor	7.98403
1217	s16586	TCGA-LIHC	Primary Tumor	6.58161
1218	s16587	TCGA-LIHC	Primary Tumor	6.56773
1219	s16608	TCGA-LIHC	Primary Tumor	5.5904
1220	s16627	TCGA-LIHC	Primary Tumor	6.73516
1221	s16595	TCGA-LIHC	Blood Derived Normal	6.76389
1222	s16638	TCGA-LIHC	Primary Tumor	4.14804
1223	s16632	TCGA-LIHC	Primary Tumor	5.27279
1224	s16664	TCGA-LIHC	Primary Tumor	5.87618
1225	s16653	TCGA-LIHC	Primary Tumor	9.9785
1226	s16591	TCGA-LIHC	Primary Tumor	6.18958
1227	s16615	TCGA-LIHC	Solid Tissue Normal	5.38524
1228	s16623	TCGA-LIHC	Solid Tissue Normal	5.16076
1229	s16612	TCGA-LIHC	Solid Tissue Normal	5.49784
1230	s16585	TCGA-LIHC	Primary Tumor	6.72422
1231	s16611	TCGA-LIHC	Primary Tumor	7.11429
1232	s16647	TCGA-LIHC	Primary Tumor	6.06921
1233	s16651	TCGA-LIHC	Primary Tumor	6.43181
1234	s16590	TCGA-LIHC	Blood Derived Normal	5.41802
1235	s16650	TCGA-LIHC	Primary Tumor	4.12933
1236	s16619	TCGA-LIHC	Solid Tissue Normal	6.12973
1237	s16642	TCGA-LIHC	Primary Tumor	4.60129
1238	s16600	TCGA-LIHC	Primary Tumor	4.60553
1239	s16665	TCGA-LIHC	Primary Tumor	5.50835
1240	s16610	TCGA-LIHC	Primary Tumor	6.29678
1241	s16629	TCGA-LIHC	Primary Tumor	5.88096
1242	s16663	TCGA-LIHC	Primary Tumor	6.12919
1243	s16617	TCGA-LIHC	Primary Tumor	5.28896
1244	s16659	TCGA-LIHC	Primary Tumor	6.74573
1245	s16597	TCGA-LIHC	Blood Derived Normal	6.09542
1246	s16649	TCGA-LIHC	Primary Tumor	6.40548
1247	s16599	TCGA-LIHC	Solid Tissue Normal	6.63933
1248	s16631	TCGA-LIHC	Primary Tumor	5.47151
1249	s16607	TCGA-LIHC	Primary Tumor	3.97865
1250	s16660	TCGA-LIHC	Primary Tumor	6.12332
1251	s16668	TCGA-LIHC	Primary Tumor	4.98849
1252	s16616	TCGA-LIHC	Solid Tissue Normal	5.83713
1253	s16609	TCGA-LIHC	Primary Tumor	7.37838
1254	s16583	TCGA-LIHC	Blood Derived Normal	5.99391
1255	s16621	TCGA-LIHC	Solid Tissue Normal	6.13034
1256	s16605	TCGA-LIHC	Primary Tumor	7.03757
1257	s16582	TCGA-LIHC	Primary Tumor	5.98192
1258	s16658	TCGA-LIHC	Primary Tumor	5.51125
1259	s16589	TCGA-LIHC	Primary Tumor	5.97842
1260	s16662	TCGA-LIHC	Primary Tumor	4.67119
1261	s16614	TCGA-LIHC	Solid Tissue Normal	5.94229
1262	s16598	TCGA-LIHC	Blood Derived Normal	6.09876
1263	s16643	TCGA-LIHC	Primary Tumor	5.10319
1264	s16588	TCGA-LIHC	Primary Tumor	6.26114
1265	s16637	TCGA-LIHC	Primary Tumor	6.68232
1266	s16594	TCGA-LIHC	Blood Derived Normal	6.53382
1267	s16613	TCGA-LIHC	Primary Tumor	3.52769
1268	s16652	TCGA-LIHC	Primary Tumor	6.54214
1269	s16581	TCGA-LIHC	Primary Tumor	5.9216
1270	s16661	TCGA-LIHC	Primary Tumor	5.29218
1271	s16603	TCGA-LIHC	Solid Tissue Normal	7.22318
1272	s16648	TCGA-LIHC	Primary Tumor	6.26257
1273	s16624	TCGA-LIHC	Primary Tumor	6.55871
1274	s16626	TCGA-LIHC	Primary Tumor	5.31582
1275	s16604	TCGA-LIHC	Primary Tumor	6.59134
1276	s16656	TCGA-LIHC	Primary Tumor	6.51157
1277	s16771	TCGA-LIHC	Primary Tumor	5.07582
1278	s16700	TCGA-LIHC	Primary Tumor	10.7869
1279	s16687	TCGA-LIHC	Blood Derived Normal	6.02678
1280	s16704	TCGA-LIHC	Solid Tissue Normal	5.51607
1281	s16753	TCGA-LIHC	Primary Tumor	7.13098
1282	s16763	TCGA-LIHC	Primary Tumor	5.9923
1283	s16766	TCGA-LIHC	Primary Tumor	6.5125
1284	s16702	TCGA-LIHC	Solid Tissue Normal	7.00575
1285	s16672	TCGA-LIHC	Primary Tumor	5.2887
1286	s16729	TCGA-LIHC	Primary Tumor	5.68315
1287	s16767	TCGA-LIHC	Primary Tumor	6.18852
1288	s16743	TCGA-LIHC	Primary Tumor	5.86769
1289	s16705	TCGA-LIHC	Primary Tumor	6.30588
1290	s16693	TCGA-LIHC	Primary Tumor	6.37902
1291	s16681	TCGA-LIHC	Blood Derived Normal	5.61693
1292	s16757	TCGA-LIHC	Primary Tumor	3.58651
1293	s16726	TCGA-LIHC	Primary Tumor	6.53023
1294	s16751	TCGA-LIHC	Primary Tumor	5.1193
1295	s16711	TCGA-LIHC	Solid Tissue Normal	4.80219
1296	s16674	TCGA-LIHC	Solid Tissue Normal	6.62044
1297	s16734	TCGA-LIHC	Primary Tumor	6.05825
1298	s16765	TCGA-LIHC	Primary Tumor	4.48232
1299	s16699	TCGA-LIHC	Primary Tumor	6.04442
1300	s16761	TCGA-LIHC	Primary Tumor	5.39996
1301	s16739	TCGA-LIHC	Primary Tumor	6.27579
1302	s16762	TCGA-LIHC	Primary Tumor	5.72036
1303	s16703	TCGA-LIHC	Primary Tumor	5.06003
1304	s16724	TCGA-LIHC	Primary Tumor	6.60321
1305	s16732	TCGA-LIHC	Primary Tumor	4.85554
1306	s16675	TCGA-LIHC	Primary Tumor	6.37368
1307	s16748	TCGA-LIHC	Primary Tumor	5.48984
1308	s16738	TCGA-LIHC	Primary Tumor	6.61868
1309	s16717	TCGA-LIHC	Primary Tumor	4.92595
1310	s16727	TCGA-LIHC	Primary Tumor	5.6288
1311	s16770	TCGA-LIHC	Primary Tumor	2.97892
1312	s16737	TCGA-LIHC	Primary Tumor	5.44268
1313	s16696	TCGA-LIHC	Solid Tissue Normal	7.34859
1314	s16756	TCGA-LIHC	Primary Tumor	6.02791
1315	s16746	TCGA-LIHC	Primary Tumor	5.76604
1316	s16712	TCGA-LIHC	Solid Tissue Normal	5.14813
1317	s16670	TCGA-LIHC	Primary Tumor	5.44664
1318	s16714	TCGA-LIHC	Primary Tumor	6.85394
1319	s16733	TCGA-LIHC	Primary Tumor	5.89804
1320	s16676	TCGA-LIHC	Primary Tumor	6.32716
1321	s16760	TCGA-LIHC	Primary Tumor	5.31449
1322	s16677	TCGA-LIHC	Blood Derived Normal	6.92031
1323	s16716	TCGA-LIHC	Solid Tissue Normal	6.44394
1324	s16745	TCGA-LIHC	Primary Tumor	6.53322
1325	s16685	TCGA-LIHC	Primary Tumor	5.86207
1326	s16749	TCGA-LIHC	Primary Tumor	7.24868
1327	s16683	TCGA-LIHC	Blood Derived Normal	6.06206
1328	s16758	TCGA-LIHC	Primary Tumor	6.54344
1329	s16754	TCGA-LIHC	Primary Tumor	4.77585
1330	s16688	TCGA-LIHC	Primary Tumor	6.7994
1331	s16671	TCGA-LIHC	Blood Derived Normal	5.39512
1332	s16718	TCGA-LIHC	Solid Tissue Normal	6.19181
1333	s16698	TCGA-LIHC	Solid Tissue Normal	5.54262
1334	s16694	TCGA-LIHC	Solid Tissue Normal	5.36397
1335	s16713	TCGA-LIHC	Primary Tumor	4.72161
1336	s16701	TCGA-LIHC	Primary Tumor	6.62565
1337	s16755	TCGA-LIHC	Primary Tumor	6.23838
1338	s16750	TCGA-LIHC	Primary Tumor	6.60875
1339	s16686	TCGA-LIHC	Primary Tumor	6.40454
1340	s16723	TCGA-LIHC	Primary Tumor	6.8272
1341	s16720	TCGA-LIHC	Solid Tissue Normal	6.94142
1342	s16769	TCGA-LIHC	Primary Tumor	5.9934
1343	s16679	TCGA-LIHC	Solid Tissue Normal	6.12228
1344	s16689	TCGA-LIHC	Blood Derived Normal	6.49521
1345	s16697	TCGA-LIHC	Solid Tissue Normal	5.6555
1346	s16742	TCGA-LIHC	Primary Tumor	5.41649
1347	s16678	TCGA-LIHC	Solid Tissue Normal	6.55203
1348	s16690	TCGA-LIHC	Primary Tumor	6.53579
1349	s16709	TCGA-LIHC	Primary Tumor	5.63771
1350	s16735	TCGA-LIHC	Primary Tumor	5.16919
1351	s16740	TCGA-LIHC	Primary Tumor	5.65862
1352	s16719	TCGA-LIHC	Primary Tumor	4.69738
1353	s16684	TCGA-LIHC	Blood Derived Normal	6.02013
1354	s16715	TCGA-LIHC	Primary Tumor	5.88522
1355	s16706	TCGA-LIHC	Primary Tumor	5.46592
1356	s16710	TCGA-LIHC	Primary Tumor	6.87601
1357	s16768	TCGA-LIHC	Primary Tumor	6.4267
1358	s16752	TCGA-LIHC	Primary Tumor	8.29209
1359	s16725	TCGA-LIHC	Primary Tumor	5.4825
1360	s16691	TCGA-LIHC	Primary Tumor	5.3525
1361	s16764	TCGA-LIHC	Primary Tumor	7.15781
1362	s16722	TCGA-LIHC	Primary Tumor	5.76212
1363	s16728	TCGA-LIHC	Primary Tumor	6.54818
1364	s16695	TCGA-LIHC	Primary Tumor	7.2682
1365	s16736	TCGA-LIHC	Primary Tumor	5.16093
1366	s16682	TCGA-LIHC	Primary Tumor	5.13262
1367	s16673	TCGA-LIHC	Solid Tissue Normal	6.54524
1368	s16721	TCGA-LIHC	Primary Tumor	6.35441
1369	s16680	TCGA-LIHC	Solid Tissue Normal	6.65391
1370	s16692	TCGA-LIHC	Primary Tumor	6.8112
1371	s16708	TCGA-LIHC	Primary Tumor	8.03673
1372	s16744	TCGA-LIHC	Primary Tumor	5.64146
1373	s16759	TCGA-LIHC	Primary Tumor	4.91192
1374	s16741	TCGA-LIHC	Primary Tumor	6.379
1375	s16707	TCGA-LIHC	Primary Tumor	4.92654
1376	s16971	TCGA-LIHC	Blood Derived Normal	6.02093
1377	s17012	TCGA-LIHC	Primary Tumor	6.94648
1378	s17035	TCGA-LIHC	Primary Tumor	6.28351
1379	s17041	TCGA-LIHC	Primary Tumor	5.63019
1380	s16977	TCGA-LIHC	Primary Tumor	6.58617
1381	s17006	TCGA-LIHC	Solid Tissue Normal	4.44453
1382	s17033	TCGA-LIHC	Primary Tumor	5.7657
1383	s17004	TCGA-LIHC	Solid Tissue Normal	7.42185
1384	s16982	TCGA-LIHC	Primary Tumor	5.71326
1385	s17001	TCGA-LIHC	Primary Tumor	6.51953
1386	s16985	TCGA-LIHC	Solid Tissue Normal	6.04428
1387	s16999	TCGA-LIHC	Primary Tumor	6.28081
1388	s17000	TCGA-LIHC	Primary Tumor	5.85166
1389	s17019	TCGA-LIHC	Primary Tumor	4.56299
1390	s17011	TCGA-LIHC	Primary Tumor	5.94221
1391	s17005	TCGA-LIHC	Primary Tumor	5.99967
1392	s17029	TCGA-LIHC	Primary Tumor	6.19016
1393	s16984	TCGA-LIHC	Primary Tumor	6.58785
1394	s17025	TCGA-LIHC	Primary Tumor	6.315
1395	s16988	TCGA-LIHC	Primary Tumor	6.34113
1396	s17047	TCGA-LIHC	Primary Tumor	4.86984
1397	s16970	TCGA-LIHC	Solid Tissue Normal	5.33843
1398	s16997	TCGA-LIHC	Primary Tumor	6.26305
1399	s17034	TCGA-LIHC	Primary Tumor	6.09316
1400	s16989	TCGA-LIHC	Primary Tumor	6.30267
1401	s16979	TCGA-LIHC	Solid Tissue Normal	6.03141
1402	s17018	TCGA-LIHC	Solid Tissue Normal	6.44011
1403	s17050	TCGA-LIHC	Primary Tumor	5.72739
1404	s17055	TCGA-LIHC	Primary Tumor	2.43868
1405	s17010	TCGA-LIHC	Primary Tumor	5.8564
1406	s17020	TCGA-LIHC	Primary Tumor	6.00263
1407	s17046	TCGA-LIHC	Primary Tumor	6.33556
1408	s16981	TCGA-LIHC	Blood Derived Normal	5.45836
1409	s16980	TCGA-LIHC	Primary Tumor	5.79771
1410	s17049	TCGA-LIHC	Primary Tumor	6.31153
1411	s16975	TCGA-LIHC	Primary Tumor	6.34203
1412	s16992	TCGA-LIHC	Primary Tumor	5.30922
1413	s17051	TCGA-LIHC	Primary Tumor	5.71728
1414	s16983	TCGA-LIHC	Primary Tumor	5.78422
1415	s17030	TCGA-LIHC	Primary Tumor	5.54656
1416	s17028	TCGA-LIHC	Primary Tumor	5.5774
1417	s16993	TCGA-LIHC	Primary Tumor	6.65859
1418	s16990	TCGA-LIHC	Primary Tumor	5.4094
1419	s16996	TCGA-LIHC	Solid Tissue Normal	5.50268
1420	s17052	TCGA-LIHC	Primary Tumor	5.61821
1421	s16998	TCGA-LIHC	Primary Tumor	6.49222
1422	s17027	TCGA-LIHC	Primary Tumor	3.18384
1423	s17013	TCGA-LIHC	Primary Tumor	6.02852
1424	s16976	TCGA-LIHC	Primary Tumor	6.9242
1425	s17048	TCGA-LIHC	Primary Tumor	4.27472
1426	s17053	TCGA-LIHC	Primary Tumor	7.34016
1427	s17008	TCGA-LIHC	Solid Tissue Normal	6.71426
1428	s16973	TCGA-LIHC	Blood Derived Normal	6.36396
1429	s17003	TCGA-LIHC	Primary Tumor	7.3513
1430	s17038	TCGA-LIHC	Primary Tumor	5.96608
1431	s16994	TCGA-LIHC	Primary Tumor	5.68837
1432	s17054	TCGA-LIHC	Primary Tumor	6.36608
1433	s17032	TCGA-LIHC	Primary Tumor	6.64678
1434	s17009	TCGA-LIHC	Primary Tumor	6.901
1435	s17014	TCGA-LIHC	Primary Tumor	5.93962
1436	s17045	TCGA-LIHC	Primary Tumor	5.64409
1437	s17036	TCGA-LIHC	Primary Tumor	6.15382
1438	s17026	TCGA-LIHC	Primary Tumor	4.88906
1439	s17031	TCGA-LIHC	Primary Tumor	5.43494
1440	s17015	TCGA-LIHC	Primary Tumor	6.08795
1441	s17024	TCGA-LIHC	Primary Tumor	5.27251
1442	s17042	TCGA-LIHC	Primary Tumor	6.50001
1443	s17023	TCGA-LIHC	Primary Tumor	5.59886
1444	s17017	TCGA-LIHC	Primary Tumor	6.50768
1445	s16986	TCGA-LIHC	Primary Tumor	5.69318
1446	s16995	TCGA-LIHC	Primary Tumor	6.00072
1447	s17022	TCGA-LIHC	Primary Tumor	6.08019
1448	s17002	TCGA-LIHC	Solid Tissue Normal	6.66545
1449	s17016	TCGA-LIHC	Primary Tumor	6.74809
1450	s17040	TCGA-LIHC	Primary Tumor	5.33308
1451	s17037	TCGA-LIHC	Primary Tumor	4.48916
1452	s16974	TCGA-LIHC	Blood Derived Normal	6.70066
1453	s17007	TCGA-LIHC	Primary Tumor	4.53999
1454	s16987	TCGA-LIHC	Blood Derived Normal	6.1489
1455	s17044	TCGA-LIHC	Primary Tumor	3.0372
1456	s16991	TCGA-LIHC	Solid Tissue Normal	7.20379
1457	s16972	TCGA-LIHC	Primary Tumor	6.19546
1458	s17043	TCGA-LIHC	Primary Tumor	5.86601
1459	s17021	TCGA-LIHC	Primary Tumor	4.80702
1460	s16978	TCGA-LIHC	Primary Tumor	6.43175
1461	s17111	TCGA-LIHC	Primary Tumor	6.57355
1462	s17091	TCGA-LIHC	Primary Tumor	5.11436
1463	s17095	TCGA-LIHC	Primary Tumor	5.90719
1464	s17076	TCGA-LIHC	Primary Tumor	6.90418
1465	s17075	TCGA-LIHC	Primary Tumor	6.64579
1466	s17106	TCGA-LIHC	Primary Tumor	6.54135
1467	s17081	TCGA-LIHC	Primary Tumor	5.53011
1468	s17085	TCGA-LIHC	Primary Tumor	4.2657
1469	s17093	TCGA-LIHC	Primary Tumor	6.01462
1470	s17058	TCGA-LIHC	Solid Tissue Normal	6.65507
1471	s17096	TCGA-LIHC	Primary Tumor	6.09681
1472	s17080	TCGA-LIHC	Primary Tumor	5.65891
1473	s17104	TCGA-LIHC	Primary Tumor	5.27609
1474	s17064	TCGA-LIHC	Primary Tumor	6.16518
1475	s17071	TCGA-LIHC	Solid Tissue Normal	6.22357
1476	s17062	TCGA-LIHC	Solid Tissue Normal	6.08624
1477	s17074	TCGA-LIHC	Primary Tumor	4.07935
1478	s17102	TCGA-LIHC	Primary Tumor	9.75236
1479	s17068	TCGA-LIHC	Primary Tumor	6.13711
1480	s17101	TCGA-LIHC	Primary Tumor	4.5694
1481	s17097	TCGA-LIHC	Primary Tumor	7.15591
1482	s17086	TCGA-LIHC	Primary Tumor	6.50505
1483	s17066	TCGA-LIHC	Primary Tumor	7.5706
1484	s17100	TCGA-LIHC	Primary Tumor	8.36912
1485	s17099	TCGA-LIHC	Primary Tumor	4.47749
1486	s17082	TCGA-LIHC	Primary Tumor	4.91308
1487	s17060	TCGA-LIHC	Blood Derived Normal	6.00112
1488	s17079	TCGA-LIHC	Primary Tumor	2.57761
1489	s17072	TCGA-LIHC	Solid Tissue Normal	6.04576
1490	s17088	TCGA-LIHC	Primary Tumor	6.55755
1491	s17070	TCGA-LIHC	Primary Tumor	6.95268
1492	s17098	TCGA-LIHC	Primary Tumor	4.36974
1493	s17067	TCGA-LIHC	Solid Tissue Normal	6.47987
1494	s17090	TCGA-LIHC	Primary Tumor	7.23223
1495	s17103	TCGA-LIHC	Primary Tumor	6.94328
1496	s17108	TCGA-LIHC	Primary Tumor	4.54897
1497	s17078	TCGA-LIHC	Primary Tumor	5.62325
1498	s17105	TCGA-LIHC	Primary Tumor	6.19567
1499	s17092	TCGA-LIHC	Primary Tumor	5.69461
1500	s17069	TCGA-LIHC	Solid Tissue Normal	5.33108
1501	s17094	TCGA-LIHC	Primary Tumor	3.89604
1502	s17073	TCGA-LIHC	Solid Tissue Normal	5.21412
1503	s17109	TCGA-LIHC	Primary Tumor	5.86185
1504	s17110	TCGA-LIHC	Primary Tumor	6.74891
1505	s17084	TCGA-LIHC	Primary Tumor	6.85046
1506	s17065	TCGA-LIHC	Blood Derived Normal	5.13206
1507	s17089	TCGA-LIHC	Primary Tumor	6.27141
1508	s17107	TCGA-LIHC	Primary Tumor	5.16515
1509	s17056	TCGA-LIHC	Solid Tissue Normal	5.30346
1510	s17061	TCGA-LIHC	Blood Derived Normal	5.87621
1511	s17059	TCGA-LIHC	Primary Tumor	6.48292
1512	s17077	TCGA-LIHC	Solid Tissue Normal	6.32966
1513	s17057	TCGA-LIHC	Primary Tumor	5.45697
1514	s17083	TCGA-LIHC	Primary Tumor	6.22347
1515	s17063	TCGA-LIHC	Blood Derived Normal	6.16803
1516	s15697	TCGA-HNSC	Primary Tumor	6.35037
1517	s15624	TCGA-HNSC	Blood Derived Normal	8.54075
1518	s15741	TCGA-HNSC	Primary Tumor	5.12827
1519	s15623	TCGA-HNSC	Blood Derived Normal	5.17069
1520	s15629	TCGA-HNSC	Primary Tumor	8.39834
1521	s15725	TCGA-HNSC	Solid Tissue Normal	8.31874
1522	s15712	TCGA-HNSC	Primary Tumor	6.71604
1523	s15731	TCGA-HNSC	Primary Tumor	6.0702
1524	s15678	TCGA-HNSC	Primary Tumor	9.92387
1525	s15677	TCGA-HNSC	Primary Tumor	4.99128
1526	s15604	TCGA-HNSC	Primary Tumor	4.71296
1527	s15679	TCGA-HNSC	Primary Tumor	6.55805
1528	s15664	TCGA-HNSC	Primary Tumor	8.83845
1529	s15613	TCGA-HNSC	Blood Derived Normal	5.35938
1530	s15676	TCGA-HNSC	Primary Tumor	6.02166
1531	s15682	TCGA-HNSC	Primary Tumor	8.8035
1532	s15642	TCGA-HNSC	Solid Tissue Normal	5.08235
1533	s15724	TCGA-HNSC	Primary Tumor	6.73585
1534	s15655	TCGA-HNSC	Primary Tumor	6.12899
1535	s15609	TCGA-HNSC	Primary Tumor	7.23891
1536	s15693	TCGA-HNSC	Primary Tumor	4.9538
1537	s15680	TCGA-HNSC	Primary Tumor	10.3845
1538	s15730	TCGA-HNSC	Primary Tumor	10.9286
1539	s15611	TCGA-HNSC	Blood Derived Normal	4.71528
1540	s15652	TCGA-HNSC	Primary Tumor	18.2371
1541	s15632	TCGA-HNSC	Primary Tumor	4.1752
1542	s15661	TCGA-HNSC	Primary Tumor	7.57447
1543	s15729	TCGA-HNSC	Primary Tumor	7.13687
1544	s15648	TCGA-HNSC	Primary Tumor	15.3862
1545	s15665	TCGA-HNSC	Primary Tumor	7.73933
1546	s15615	TCGA-HNSC	Primary Tumor	6.20546
1547	s15736	TCGA-HNSC	Primary Tumor	7.03395
1548	s15616	TCGA-HNSC	Primary Tumor	11.3656
1549	s15626	TCGA-HNSC	Blood Derived Normal	5.54933
1550	s15640	TCGA-HNSC	Primary Tumor	6.39645
1551	s15713	TCGA-HNSC	Primary Tumor	11.5414
1552	s15603	TCGA-HNSC	Primary Tumor	5.48195
1553	s15737	TCGA-HNSC	Primary Tumor	7.82909
1554	s15622	TCGA-HNSC	Blood Derived Normal	5.1401
1555	s15708	TCGA-HNSC	Primary Tumor	6.99198
1556	s15705	TCGA-HNSC	Primary Tumor	6.30451
1557	s15621	TCGA-HNSC	Blood Derived Normal	5.77794
1558	s15732	TCGA-HNSC	Primary Tumor	6.41655
1559	s15639	TCGA-HNSC	Blood Derived Normal	4.29503
1560	s15644	TCGA-HNSC	Blood Derived Normal	5.13688
1561	s15637	TCGA-HNSC	Primary Tumor	14.6624
1562	s15733	TCGA-HNSC	Primary Tumor	5.93147
1563	s15688	TCGA-HNSC	Primary Tumor	6.14565
1564	s15706	TCGA-HNSC	Primary Tumor	4.84285
1565	s15643	TCGA-HNSC	Solid Tissue Normal	11.5733
1566	s15650	TCGA-HNSC	Primary Tumor	4.40775
1567	s15681	TCGA-HNSC	Primary Tumor	4.94088
1568	s15704	TCGA-HNSC	Primary Tumor	4.41665
1569	s15735	TCGA-HNSC	Primary Tumor	5.48795
1570	s15635	TCGA-HNSC	Blood Derived Normal	4.6177
1571	s15653	TCGA-HNSC	Blood Derived Normal	5.73809
1572	s15657	TCGA-HNSC	Blood Derived Normal	5.86154
1573	s15602	TCGA-HNSC	Primary Tumor	6.8582
1574	s15620	TCGA-HNSC	Primary Tumor	17.1198
1575	s15656	TCGA-HNSC	Blood Derived Normal	5.52722
1576	s15673	TCGA-HNSC	Solid Tissue Normal	5.53167
1577	s15668	TCGA-HNSC	Primary Tumor	5.48818
1578	s15718	TCGA-HNSC	Primary Tumor	6.05348
1579	s15610	TCGA-HNSC	Primary Tumor	13.1539
1580	s15641	TCGA-HNSC	Primary Tumor	17.8982
1581	s15646	TCGA-HNSC	Primary Tumor	15.0836
1582	s15674	TCGA-HNSC	Primary Tumor	5.91689
1583	s15690	TCGA-HNSC	Primary Tumor	6.39193
1584	s15714	TCGA-HNSC	Primary Tumor	9.3287
1585	s15719	TCGA-HNSC	Primary Tumor	10.8042
1586	s15685	TCGA-HNSC	Primary Tumor	5.30695
1587	s15649	TCGA-HNSC	Blood Derived Normal	4.03294
1588	s15625	TCGA-HNSC	Blood Derived Normal	6.52955
1589	s15739	TCGA-HNSC	Primary Tumor	7.20248
1590	s15617	TCGA-HNSC	Primary Tumor	16.112
1591	s15614	TCGA-HNSC	Blood Derived Normal	4.48129
1592	s15703	TCGA-HNSC	Primary Tumor	9.83813
1593	s15630	TCGA-HNSC	Blood Derived Normal	2.90855
1594	s15618	TCGA-HNSC	Blood Derived Normal	4.95359
1595	s15695	TCGA-HNSC	Primary Tumor	5.78567
1596	s15689	TCGA-HNSC	Primary Tumor	5.54453
1597	s15645	TCGA-HNSC	Solid Tissue Normal	10.7931
1598	s15721	TCGA-HNSC	Primary Tumor	6.82477
1599	s15619	TCGA-HNSC	Blood Derived Normal	5.33871
1600	s15675	TCGA-HNSC	Primary Tumor	5.96006
1601	s15669	TCGA-HNSC	Primary Tumor	7.50768
1602	s15605	TCGA-HNSC	Primary Tumor	6.52776
1603	s15663	TCGA-HNSC	Primary Tumor	6.4955
1604	s15696	TCGA-HNSC	Primary Tumor	6.9128
1605	s15651	TCGA-HNSC	Blood Derived Normal	3.9281
1606	s15715	TCGA-HNSC	Primary Tumor	9.47606
1607	s15699	TCGA-HNSC	Primary Tumor	6.05902
1608	s15720	TCGA-HNSC	Primary Tumor	5.77292
1609	s15700	TCGA-HNSC	Primary Tumor	5.06046
1610	s15707	TCGA-HNSC	Primary Tumor	8.39667
1611	s15631	TCGA-HNSC	Primary Tumor	7.08811
1612	s15660	TCGA-HNSC	Primary Tumor	7.41147
1613	s15727	TCGA-HNSC	Primary Tumor	9.04945
1614	s15686	TCGA-HNSC	Primary Tumor	11.2628
1615	s15723	TCGA-HNSC	Primary Tumor	9.51281
1616	s15633	TCGA-HNSC	Primary Tumor	6.18436
1617	s15734	TCGA-HNSC	Primary Tumor	6.54354
1618	s15628	TCGA-HNSC	Blood Derived Normal	5.63105
1619	s15684	TCGA-HNSC	Solid Tissue Normal	6.59473
1620	s15671	TCGA-HNSC	Primary Tumor	10.0104
1621	s15634	TCGA-HNSC	Primary Tumor	5.40816
1622	s15701	TCGA-HNSC	Primary Tumor	7.65646
1623	s15607	TCGA-HNSC	Primary Tumor	6.30903
1624	s15709	TCGA-HNSC	Solid Tissue Normal	6.83632
1625	s15636	TCGA-HNSC	Blood Derived Normal	4.56118
1626	s15726	TCGA-HNSC	Primary Tumor	7.19176
1627	s15702	TCGA-HNSC	Primary Tumor	5.95614
1628	s15710	TCGA-HNSC	Primary Tumor	5.9747
1629	s15740	TCGA-HNSC	Primary Tumor	4.99736
1630	s15683	TCGA-HNSC	Primary Tumor	6.23801
1631	s15662	TCGA-HNSC	Primary Tumor	11.4836
1632	s15627	TCGA-HNSC	Blood Derived Normal	5.06901
1633	s15659	TCGA-HNSC	Primary Tumor	5.56679
1634	s15608	TCGA-HNSC	Blood Derived Normal	4.40493
1635	s15711	TCGA-HNSC	Primary Tumor	14.0929
1636	s15647	TCGA-HNSC	Primary Tumor	16.131
1637	s15717	TCGA-HNSC	Primary Tumor	5.99238
1638	s15698	TCGA-HNSC	Primary Tumor	15.3441
1639	s15694	TCGA-HNSC	Primary Tumor	7.5412
1640	s15716	TCGA-HNSC	Primary Tumor	6.21647
1641	s15670	TCGA-HNSC	Primary Tumor	6.48332
1642	s15691	TCGA-HNSC	Solid Tissue Normal	3.98347
1643	s15654	TCGA-HNSC	Blood Derived Normal	5.10278
1644	s15612	TCGA-HNSC	Blood Derived Normal	4.68978
1645	s15728	TCGA-HNSC	Primary Tumor	4.88342
1646	s15658	TCGA-HNSC	Solid Tissue Normal	6.08723
1647	s15638	TCGA-HNSC	Primary Tumor	10.7078
1648	s15722	TCGA-HNSC	Primary Tumor	8.84561
1649	s15666	TCGA-HNSC	Solid Tissue Normal	6.54691
1650	s15667	TCGA-HNSC	Primary Tumor	6.13724
1651	s15738	TCGA-HNSC	Primary Tumor	5.89305
1652	s15687	TCGA-HNSC	Primary Tumor	7.30715
1653	s15692	TCGA-HNSC	Primary Tumor	4.98975
1654	s15606	TCGA-HNSC	Primary Tumor	5.64351
1655	s15672	TCGA-HNSC	Primary Tumor	10.9746
1656	s16230	TCGA-HNSC	Primary Tumor	12.6746
1657	s16229	TCGA-HNSC	Primary Tumor	6.88945
1658	s16209	TCGA-HNSC	Primary Tumor	11.8414
1659	s16240	TCGA-HNSC	Primary Tumor	5.74116
1660	s16296	TCGA-HNSC	Primary Tumor	5.24954
1661	s16231	TCGA-HNSC	Primary Tumor	5.39862
1662	s16217	TCGA-HNSC	Primary Tumor	7.11646
1663	s16249	TCGA-HNSC	Primary Tumor	5.30208
1664	s16166	TCGA-HNSC	Primary Tumor	5.19868
1665	s16215	TCGA-HNSC	Primary Tumor	7.89376
1666	s16238	TCGA-HNSC	Primary Tumor	5.89556
1667	s16263	TCGA-HNSC	Primary Tumor	5.74802
1668	s16295	TCGA-HNSC	Primary Tumor	11.5392
1669	s16218	TCGA-HNSC	Primary Tumor	5.2235
1670	s16197	TCGA-HNSC	Primary Tumor	15.3955
1671	s16308	TCGA-HNSC	Primary Tumor	6.46537
1672	s16202	TCGA-HNSC	Blood Derived Normal	5.31059
1673	s16183	TCGA-HNSC	Blood Derived Normal	5.38583
1674	s16174	TCGA-HNSC	Blood Derived Normal	6.05572
1675	s16190	TCGA-HNSC	Blood Derived Normal	3.33371
1676	s16300	TCGA-HNSC	Primary Tumor	6.30611
1677	s16267	TCGA-HNSC	Primary Tumor	7.93421
1678	s16216	TCGA-HNSC	Primary Tumor	7.69665
1679	s16235	TCGA-HNSC	Primary Tumor	7.78239
1680	s16271	TCGA-HNSC	Primary Tumor	7.27336
1681	s16224	TCGA-HNSC	Primary Tumor	5.79901
1682	s16226	TCGA-HNSC	Primary Tumor	5.13306
1683	s16207	TCGA-HNSC	Blood Derived Normal	4.43739
1684	s16204	TCGA-HNSC	Blood Derived Normal	4.55353
1685	s16172	TCGA-HNSC	Blood Derived Normal	5.7958
1686	s16198	TCGA-HNSC	Primary Tumor	12.8937
1687	s16282	TCGA-HNSC	Solid Tissue Normal	7.17543
1688	s16265	TCGA-HNSC	Primary Tumor	5.2742
1689	s16167	TCGA-HNSC	Primary Tumor	7.66892
1690	s16219	TCGA-HNSC	Primary Tumor	5.51009
1691	s16169	TCGA-HNSC	Primary Tumor	12.8752
1692	s16255	TCGA-HNSC	Primary Tumor	5.31422
1693	s16203	TCGA-HNSC	Solid Tissue Normal	16.9437
1694	s16201	TCGA-HNSC	Primary Tumor	4.42315
1695	s16189	TCGA-HNSC	Blood Derived Normal	3.52786
1696	s16221	TCGA-HNSC	Primary Tumor	7.08468
1697	s16173	TCGA-HNSC	Blood Derived Normal	5.54497
1698	s16176	TCGA-HNSC	Primary Tumor	9.9489
1699	s16208	TCGA-HNSC	Blood Derived Normal	5.34965
1700	s16194	TCGA-HNSC	Primary Tumor	4.74236
1701	s16251	TCGA-HNSC	Primary Tumor	6.59481
1702	s16184	TCGA-HNSC	Primary Tumor	6.87931
1703	s16309	TCGA-HNSC	Primary Tumor	6.23614
1704	s16261	TCGA-HNSC	Primary Tumor	12.4509
1705	s16191	TCGA-HNSC	Solid Tissue Normal	6.70163
1706	s16227	TCGA-HNSC	Primary Tumor	6.2659
1707	s16305	TCGA-HNSC	Primary Tumor	6.50998
1708	s16213	TCGA-HNSC	Solid Tissue Normal	7.73175
1709	s16188	TCGA-HNSC	Blood Derived Normal	3.8665
1710	s16304	TCGA-HNSC	Primary Tumor	8.10937
1711	s16171	TCGA-HNSC	Primary Tumor	17.0453
1712	s16266	TCGA-HNSC	Primary Tumor	7.40321
1713	s16239	TCGA-HNSC	Primary Tumor	4.77495
1714	s16307	TCGA-HNSC	Primary Tumor	5.80978
1715	s16187	TCGA-HNSC	Blood Derived Normal	2.81843
1716	s16244	TCGA-HNSC	Solid Tissue Normal	5.87099
1717	s16195	TCGA-HNSC	Blood Derived Normal	5.53501
1718	s16252	TCGA-HNSC	Primary Tumor	7.52216
1719	s16245	TCGA-HNSC	Solid Tissue Normal	8.32312
1720	s16289	TCGA-HNSC	Primary Tumor	5.56385
1721	s16294	TCGA-HNSC	Primary Tumor	5.02497
1722	s16299	TCGA-HNSC	Primary Tumor	6.4651
1723	s16164	TCGA-HNSC	Blood Derived Normal	5.09583
1724	s16193	TCGA-HNSC	Primary Tumor	16.1185
1725	s16236	TCGA-HNSC	Solid Tissue Normal	6.05092
1726	s16286	TCGA-HNSC	Primary Tumor	5.48335
1727	s16242	TCGA-HNSC	Solid Tissue Normal	8.45895
1728	s16293	TCGA-HNSC	Primary Tumor	8.17563
1729	s16301	TCGA-HNSC	Primary Tumor	5.56103
1730	s16288	TCGA-HNSC	Primary Tumor	11.2711
1731	s16297	TCGA-HNSC	Primary Tumor	6.69095
1732	s16186	TCGA-HNSC	Primary Tumor	3.2945
1733	s16170	TCGA-HNSC	Blood Derived Normal	4.50134
1734	s16234	TCGA-HNSC	Primary Tumor	6.58475
1735	s16200	TCGA-HNSC	Blood Derived Normal	4.79888
1736	s16180	TCGA-HNSC	Primary Tumor	12.4614
1737	s16205	TCGA-HNSC	Solid Tissue Normal	4.65027
1738	s16257	TCGA-HNSC	Primary Tumor	5.64224
1739	s16182	TCGA-HNSC	Blood Derived Normal	5.40949
1740	s16178	TCGA-HNSC	Primary Tumor	7.77925
1741	s16284	TCGA-HNSC	Primary Tumor	10.6783
1742	s16269	TCGA-HNSC	Primary Tumor	4.53791
1743	s16232	TCGA-HNSC	Primary Tumor	4.38315
1744	s16283	TCGA-HNSC	Primary Tumor	6.60659
1745	s16262	TCGA-HNSC	Primary Tumor	7.85059
1746	s16258	TCGA-HNSC	Primary Tumor	6.97088
1747	s16185	TCGA-HNSC	Blood Derived Normal	5.09599
1748	s16225	TCGA-HNSC	Primary Tumor	13.3395
1749	s16220	TCGA-HNSC	Primary Tumor	7.03416
1750	s16192	TCGA-HNSC	Primary Tumor	4.63216
1751	s16248	TCGA-HNSC	Primary Tumor	4.53204
1752	s16259	TCGA-HNSC	Primary Tumor	5.65011
1753	s16302	TCGA-HNSC	Primary Tumor	6.71179
1754	s16277	TCGA-HNSC	Primary Tumor	5.93016
1755	s16247	TCGA-HNSC	Primary Tumor	5.59633
1756	s16241	TCGA-HNSC	Primary Tumor	5.10737
1757	s16276	TCGA-HNSC	Primary Tumor	6.4949
1758	s16177	TCGA-HNSC	Primary Tumor	5.53079
1759	s16237	TCGA-HNSC	Primary Tumor	5.68571
1760	s16310	TCGA-HNSC	Primary Tumor	5.06746
1761	s16281	TCGA-HNSC	Primary Tumor	7.71472
1762	s16280	TCGA-HNSC	Primary Tumor	9.19872
1763	s16179	TCGA-HNSC	Blood Derived Normal	5.44154
1764	s16292	TCGA-HNSC	Primary Tumor	9.79983
1765	s16291	TCGA-HNSC	Primary Tumor	5.20587
1766	s16199	TCGA-HNSC	Solid Tissue Normal	13.6233
1767	s16228	TCGA-HNSC	Primary Tumor	5.17061
1768	s16206	TCGA-HNSC	Blood Derived Normal	4.38708
1769	s16260	TCGA-HNSC	Primary Tumor	6.64318
1770	s16290	TCGA-HNSC	Primary Tumor	6.11952
1771	s16264	TCGA-HNSC	Primary Tumor	8.00473
1772	s16270	TCGA-HNSC	Primary Tumor	5.95145
1773	s16196	TCGA-HNSC	Primary Tumor	13.2846
1774	s16287	TCGA-HNSC	Primary Tumor	5.8786
1775	s16285	TCGA-HNSC	Primary Tumor	6.18526
1776	s16233	TCGA-HNSC	Solid Tissue Normal	6.44982
1777	s16250	TCGA-HNSC	Solid Tissue Normal	6.59955
1778	s16222	TCGA-HNSC	Primary Tumor	6.02061
1779	s16279	TCGA-HNSC	Primary Tumor	7.01963
1780	s16175	TCGA-HNSC	Blood Derived Normal	5.86014
1781	s16165	TCGA-HNSC	Blood Derived Normal	6.3505
1782	s16268	TCGA-HNSC	Primary Tumor	6.92269
1783	s16210	TCGA-HNSC	Primary Tumor	6.59852
1784	s16212	TCGA-HNSC	Primary Tumor	6.9101
1785	s16256	TCGA-HNSC	Primary Tumor	4.97778
1786	s16275	TCGA-HNSC	Primary Tumor	5.76357
1787	s16253	TCGA-HNSC	Primary Tumor	4.4363
1788	s16243	TCGA-HNSC	Primary Tumor	10.3432
1789	s16163	TCGA-HNSC	Primary Tumor	6.5464
1790	s16246	TCGA-HNSC	Primary Tumor	6.726
1791	s16273	TCGA-HNSC	Primary Tumor	6.02145
1792	s16254	TCGA-HNSC	Solid Tissue Normal	5.77593
1793	s16298	TCGA-HNSC	Primary Tumor	4.6333
1794	s16223	TCGA-HNSC	Primary Tumor	9.63286
1795	s16306	TCGA-HNSC	Primary Tumor	7.68024
1796	s16168	TCGA-HNSC	Primary Tumor	14.2109
1797	s16303	TCGA-HNSC	Primary Tumor	9.01988
1798	s16211	TCGA-HNSC	Primary Tumor	7.6248
1799	s16272	TCGA-HNSC	Primary Tumor	7.46734
1800	s16181	TCGA-HNSC	Primary Tumor	7.44097
1801	s16278	TCGA-HNSC	Primary Tumor	7.58125
1802	s16214	TCGA-HNSC	Primary Tumor	4.94618
1803	s15527	TCGA-HNSC	Blood Derived Normal	5.23487
1804	s15483	TCGA-HNSC	Blood Derived Normal	5.55356
1805	s15518	TCGA-HNSC	Blood Derived Normal	4.28534
1806	s15526	TCGA-HNSC	Primary Tumor	16.1685
1807	s15552	TCGA-HNSC	Primary Tumor	10.7191
1808	s15584	TCGA-HNSC	Primary Tumor	5.46579
1809	s15571	TCGA-HNSC	Primary Tumor	6.20597
1810	s15537	TCGA-HNSC	Primary Tumor	6.35177
1811	s15557	TCGA-HNSC	Solid Tissue Normal	6.62902
1812	s15540	TCGA-HNSC	Primary Tumor	8.89991
1813	s15509	TCGA-HNSC	Primary Tumor	18.373
1814	s15484	TCGA-HNSC	Primary Tumor	7.49044
1815	s15582	TCGA-HNSC	Primary Tumor	12.3124
1816	s15590	TCGA-HNSC	Solid Tissue Normal	7.3909
1817	s15534	TCGA-HNSC	Primary Tumor	16.351
1818	s15504	TCGA-HNSC	Primary Tumor	14.9712
1819	s15500	TCGA-HNSC	Primary Tumor	8.10554
1820	s15493	TCGA-HNSC	Primary Tumor	14.0416
1821	s15485	TCGA-HNSC	Blood Derived Normal	5.37626
1822	s15585	TCGA-HNSC	Primary Tumor	7.232
1823	s15599	TCGA-HNSC	Primary Tumor	6.23666
1824	s15562	TCGA-HNSC	Solid Tissue Normal	5.64769
1825	s15531	TCGA-HNSC	Primary Tumor	15.7108
1826	s15551	TCGA-HNSC	Solid Tissue Normal	5.44758
1827	s15516	TCGA-HNSC	Primary Tumor	6.34371
1828	s15508	TCGA-HNSC	Blood Derived Normal	6.51395
1829	s15587	TCGA-HNSC	Primary Tumor	5.58079
1830	s15596	TCGA-HNSC	Primary Tumor	6.40395
1831	s15544	TCGA-HNSC	Primary Tumor	6.3476
1832	s15572	TCGA-HNSC	Primary Tumor	7.08047
1833	s15486	TCGA-HNSC	Primary Tumor	5.99616
1834	s15517	TCGA-HNSC	Blood Derived Normal	5.17421
1835	s15564	TCGA-HNSC	Primary Tumor	6.50974
1836	s15487	TCGA-HNSC	Blood Derived Normal	4.50237
1837	s15546	TCGA-HNSC	Primary Tumor	6.58854
1838	s15497	TCGA-HNSC	Primary Tumor	12.9468
1839	s15574	TCGA-HNSC	Solid Tissue Normal	8.16917
1840	s15496	TCGA-HNSC	Primary Tumor	17.973
1841	s15600	TCGA-HNSC	Primary Tumor	4.36624
1842	s15594	TCGA-HNSC	Primary Tumor	5.73989
1843	s15567	TCGA-HNSC	Primary Tumor	7.6906
1844	s15507	TCGA-HNSC	Blood Derived Normal	3.07264
1845	s15528	TCGA-HNSC	Primary Tumor	5.73215
1846	s15513	TCGA-HNSC	Solid Tissue Normal	5.17483
1847	s15561	TCGA-HNSC	Primary Tumor	10.7096
1848	s15568	TCGA-HNSC	Primary Tumor	4.6444
1849	s15525	TCGA-HNSC	Blood Derived Normal	4.22724
1850	s15511	TCGA-HNSC	Primary Tumor	9.75579
1851	s15543	TCGA-HNSC	Primary Tumor	7.35916
1852	s15510	TCGA-HNSC	Solid Tissue Normal	14.094
1853	s15601	TCGA-HNSC	Primary Tumor	13.4875
1854	s15566	TCGA-HNSC	Primary Tumor	4.74999
1855	s15502	TCGA-HNSC	Blood Derived Normal	5.68776
1856	s15553	TCGA-HNSC	Primary Tumor	13.0126
1857	s15560	TCGA-HNSC	Primary Tumor	8.05133
1858	s15598	TCGA-HNSC	Primary Tumor	13.7173
1859	s15499	TCGA-HNSC	Blood Derived Normal	5.63986
1860	s15498	TCGA-HNSC	Primary Tumor	17.8001
1861	s15501	TCGA-HNSC	Primary Tumor	13.8892
1862	s15588	TCGA-HNSC	Primary Tumor	7.09169
1863	s15575	TCGA-HNSC	Primary Tumor	6.73609
1864	s15536	TCGA-HNSC	Primary Tumor	11.2423
1865	s15592	TCGA-HNSC	Primary Tumor	7.80563
1866	s15519	TCGA-HNSC	Blood Derived Normal	4.33609
1867	s15556	TCGA-HNSC	Primary Tumor	4.78322
1868	s15491	TCGA-HNSC	Blood Derived Normal	5.35357
1869	s15558	TCGA-HNSC	Primary Tumor	5.39097
1870	s15541	TCGA-HNSC	Primary Tumor	6.94772
1871	s15586	TCGA-HNSC	Primary Tumor	7.37273
1872	s15514	TCGA-HNSC	Blood Derived Normal	5.20831
1873	s15482	TCGA-HNSC	Solid Tissue Normal	13.497
1874	s15523	TCGA-HNSC	Primary Tumor	5.53891
1875	s15535	TCGA-HNSC	Primary Tumor	16.6143
1876	s15506	TCGA-HNSC	Primary Tumor	12.2555
1877	s15550	TCGA-HNSC	Primary Tumor	6.76094
1878	s15489	TCGA-HNSC	Blood Derived Normal	5.17432
1879	s15492	TCGA-HNSC	Blood Derived Normal	5.07986
1880	s15579	TCGA-HNSC	Primary Tumor	4.8264
1881	s15548	TCGA-HNSC	Primary Tumor	5.16183
1882	s15569	TCGA-HNSC	Primary Tumor	4.68628
1883	s15559	TCGA-HNSC	Primary Tumor	8.37192
1884	s15521	TCGA-HNSC	Solid Tissue Normal	13.5675
1885	s15494	TCGA-HNSC	Blood Derived Normal	5.61128
1886	s15580	TCGA-HNSC	Primary Tumor	6.50692
1887	s15563	TCGA-HNSC	Primary Tumor	10.0025
1888	s15539	TCGA-HNSC	Primary Tumor	6.40286
1889	s15593	TCGA-HNSC	Primary Tumor	7.23389
1890	s15595	TCGA-HNSC	Primary Tumor	4.49761
1891	s15505	TCGA-HNSC	Blood Derived Normal	7.44222
1892	s15490	TCGA-HNSC	Primary Tumor	7.07027
1893	s15581	TCGA-HNSC	Primary Tumor	7.05702
1894	s15554	TCGA-HNSC	Primary Tumor	7.90949
1895	s15529	TCGA-HNSC	Primary Tumor	10.7029
1896	s15520	TCGA-HNSC	Primary Tumor	11.3132
1897	s15515	TCGA-HNSC	Primary Tumor	5.28506
1898	s15545	TCGA-HNSC	Primary Tumor	4.62043
1899	s15591	TCGA-HNSC	Primary Tumor	7.82507
1900	s15524	TCGA-HNSC	Blood Derived Normal	4.84998
1901	s15549	TCGA-HNSC	Primary Tumor	7.8899
1902	s15538	TCGA-HNSC	Primary Tumor	6.78749
1903	s15589	TCGA-HNSC	Primary Tumor	5.99072
1904	s15512	TCGA-HNSC	Solid Tissue Normal	9.37745
1905	s15578	TCGA-HNSC	Primary Tumor	9.02128
1906	s15533	TCGA-HNSC	Blood Derived Normal	5.67771
1907	s15522	TCGA-HNSC	Blood Derived Normal	4.84668
1908	s15488	TCGA-HNSC	Primary Tumor	15.8462
1909	s15577	TCGA-HNSC	Primary Tumor	9.55496
1910	s15532	TCGA-HNSC	Primary Tumor	14.0568
1911	s15570	TCGA-HNSC	Primary Tumor	9.58919
1912	s15555	TCGA-HNSC	Primary Tumor	5.82872
1913	s15495	TCGA-HNSC	Primary Tumor	10.4326
1914	s15576	TCGA-HNSC	Primary Tumor	7.44642
1915	s15530	TCGA-HNSC	Blood Derived Normal	5.41053
1916	s15565	TCGA-HNSC	Primary Tumor	13.4693
1917	s15597	TCGA-HNSC	Solid Tissue Normal	6.05003
1918	s15503	TCGA-HNSC	Primary Tumor	3.31657
1919	s15573	TCGA-HNSC	Primary Tumor	14.2855
1920	s15542	TCGA-HNSC	Solid Tissue Normal	11.4128
1921	s15547	TCGA-HNSC	Primary Tumor	3.93274
1922	s16069	TCGA-HNSC	Primary Tumor	10.5611
1923	s16045	TCGA-HNSC	Solid Tissue Normal	13.9572
1924	s16041	TCGA-HNSC	Primary Tumor	8.29715
1925	s16040	TCGA-HNSC	Primary Tumor	7.34484
1926	s16018	TCGA-HNSC	Blood Derived Normal	5.19332
1927	s16129	TCGA-HNSC	Primary Tumor	9.4827
1928	s16098	TCGA-HNSC	Primary Tumor	5.38304
1929	s16088	TCGA-HNSC	Primary Tumor	10.9835
1930	s16160	TCGA-HNSC	Primary Tumor	6.54186
1931	s16151	TCGA-HNSC	Primary Tumor	7.01469
1932	s16034	TCGA-HNSC	Blood Derived Normal	9.07134
1933	s16120	TCGA-HNSC	Primary Tumor	6.2201
1934	s16146	TCGA-HNSC	Primary Tumor	13.7393
1935	s16052	TCGA-HNSC	Primary Tumor	5.74906
1936	s16043	TCGA-HNSC	Blood Derived Normal	4.54028
1937	s16075	TCGA-HNSC	Primary Tumor	5.42546
1938	s16078	TCGA-HNSC	Primary Tumor	7.26337
1939	s16044	TCGA-HNSC	Solid Tissue Normal	4.42075
1940	s16104	TCGA-HNSC	Solid Tissue Normal	12.3111
1941	s16092	TCGA-HNSC	Primary Tumor	6.73329
1942	s16097	TCGA-HNSC	Primary Tumor	4.10336
1943	s16066	TCGA-HNSC	Primary Tumor	6.01038
1944	s16123	TCGA-HNSC	Primary Tumor	8.69993
1945	s16148	TCGA-HNSC	Primary Tumor	7.48184
1946	s16130	TCGA-HNSC	Primary Tumor	13.7547
1947	s16061	TCGA-HNSC	Primary Tumor	13.5537
1948	s16136	TCGA-HNSC	Primary Tumor	8.64024
1949	s16046	TCGA-HNSC	Solid Tissue Normal	9.04226
1950	s16074	TCGA-HNSC	Primary Tumor	10.7988
1951	s16035	TCGA-HNSC	Primary Tumor	18.4167
1952	s16089	TCGA-HNSC	Primary Tumor	8.79493
1953	s16141	TCGA-HNSC	Primary Tumor	9.15406
1954	s16022	TCGA-HNSC	Primary Tumor	5.9708
1955	s16037	TCGA-HNSC	Primary Tumor	12.4141
1956	s16025	TCGA-HNSC	Blood Derived Normal	4.68985
1957	s16073	TCGA-HNSC	Primary Tumor	8.30856
1958	s16085	TCGA-HNSC	Primary Tumor	5.01143
1959	s16156	TCGA-HNSC	Primary Tumor	6.72938
1960	s16083	TCGA-HNSC	Primary Tumor	6.75362
1961	s16162	TCGA-HNSC	Primary Tumor	4.92295
1962	s16049	TCGA-HNSC	Blood Derived Normal	5.03789
1963	s16091	TCGA-HNSC	Primary Tumor	5.54396
1964	s16106	TCGA-HNSC	Primary Tumor	5.06675
1965	s16100	TCGA-HNSC	Solid Tissue Normal	5.46873
1966	s16036	TCGA-HNSC	Blood Derived Normal	2.34923
1967	s16152	TCGA-HNSC	Primary Tumor	6.07304
1968	s16147	TCGA-HNSC	Primary Tumor	6.67512
1969	s16064	TCGA-HNSC	Primary Tumor	5.52755
1970	s16070	TCGA-HNSC	Primary Tumor	13.5588
1971	s16079	TCGA-HNSC	Primary Tumor	5.84699
1972	s16028	TCGA-HNSC	Primary Tumor	13.4939
1973	s16140	TCGA-HNSC	Primary Tumor	7.90042
1974	s16157	TCGA-HNSC	Primary Tumor	7.84668
1975	s16071	TCGA-HNSC	Primary Tumor	4.90208
1976	s16109	TCGA-HNSC	Primary Tumor	6.31153
1977	s16024	TCGA-HNSC	Primary Tumor	5.79708
1978	s16026	TCGA-HNSC	Blood Derived Normal	4.63622
1979	s16017	TCGA-HNSC	Primary Tumor	5.57017
1980	s16134	TCGA-HNSC	Primary Tumor	13.1075
1981	s16118	TCGA-HNSC	Primary Tumor	4.11569
1982	s16114	TCGA-HNSC	Primary Tumor	8.45874
1983	s16099	TCGA-HNSC	Solid Tissue Normal	5.55249
1984	s16115	TCGA-HNSC	Primary Tumor	6.68585
1985	s16084	TCGA-HNSC	Solid Tissue Normal	6.63704
1986	s16020	TCGA-HNSC	Blood Derived Normal	5.56134
1987	s16142	TCGA-HNSC	Primary Tumor	3.60106
1988	s16113	TCGA-HNSC	Primary Tumor	6.18929
1989	s16102	TCGA-HNSC	Primary Tumor	3.92809
1990	s16023	TCGA-HNSC	Primary Tumor	8.02677
1991	s16072	TCGA-HNSC	Primary Tumor	7.37177
1992	s16144	TCGA-HNSC	Primary Tumor	10.6833
1993	s16105	TCGA-HNSC	Primary Tumor	13.5132
1994	s16126	TCGA-HNSC	Primary Tumor	10.1193
1995	s16033	TCGA-HNSC	Primary Tumor	10.8875
1996	s16133	TCGA-HNSC	Primary Tumor	6.24261
1997	s16149	TCGA-HNSC	Primary Tumor	7.28309
1998	s16128	TCGA-HNSC	Primary Tumor	6.6735
1999	s16145	TCGA-HNSC	Primary Tumor	7.78115
[truncated: 14,956 more rows]

## Sheet: EDF 5b
	Stool_Proportion_COAD	Stool_Proportion_SKCM
Mean Value	0.201717	0.100687
SE	0.0254593	0.00720448
SampleID	Stool_Proportion_COAD	Stool_Proportion_SKCM
s13385	0.2175	0.1462
s13382	0.6844	0.1407
s13031	0.1626	0.3045
s13590	0.0299	0.1058
s13687	0.1998	0.0105
s13127	0.1197	0.1295
s13129	0.0863	0.0456
s13623	0.0499	0.085
s12866	0.2188	0.0969
s13282	0.1096	0.009
s13305	0.0935	0.1951
s13131	0.1064	0.1581
s13103	0.0875	0.1314
s13751	0.0953	0.0833
s13510	0.8513	0.124
s12885	0.4134	0.1043
s13261	0.0864	0.0655
s13841	0.3842	0.0942
s13295	0.0654	0.1039
s13077	0.1159	0.0094
s13128	0.0674	0.1658
s13622	0.0671	0.2028
s13463	0.093	0.0189
s13464	0.0513	0.1462
s13591	0.069	0.0309
s13790	0.2678	0.1934
s13352	0.807	0.144
s13383	0.2349	0.0356
s13384	0.1524	0.0671
s13601	0.1496	0.0455
s12883	0.3207	0.1173
s13082	0.1212	0.1706
s12971	0.1351	0.0385
s13608	0.1063	0.1631
s12972	0.0525	0.1245
s13512	0.7896	0.1089
s13838	0.7185	0.0097
s13443	0.1676	0.1104
s13134	0.1333	0.156
s13529	0.0998	0.0792
s13017	0.8599	0.043
s13133	0.0537	0.05
s13280	0.0989	0.0817
s13860	0.0703	0.1138
s12875	0.0902	0.1181
s13531	0.0817	0.1186
s13653	0.7403	0.0009
s13110	0.0962	0.1166
s13033	0.1468	0.0265
s13661	0.417	0.0679
s13380	0.0903	0.1232
s13503	0.0761	0.1297
s13275	0.1219	0.0869
s13614	0.0906	0.1688
s13526	0.115	0.1144
s13308	0.1596	0.0645
s12865	0.1664	0.0434
s13760	0.0484	0.121
s13477	0.1242	0.0105
s13528	0.0464	0.1635
s12934	0.0948	0.0731
s13306	0.0779	0.1601
s13470	0.1562	0.067
s13445	0.0856	0.0508
s13262	0.137	0.0988
s12974	0.1671	0.0923
s12973	0.0706	0.0777
s13208	0.307	0.0212
s13180	0.1702	0.2629
s12874	0.378	0.1099
		0.1042
		0.1087
		0.2398
		0.1159
		0.1156
		0.0508
		0.0217
		0.0495
		0.1307
		0.1243
		0.137
		0.0765
		0.0066
		0.1485
		0.1606
		0.0913
		0.0855
		0.0158
		0.0976
		0.0638
		0.0999
		0.1209
		0.0583
		0.1182
		0.1184
		0.0977
		0.0591
		0.1316
		0.3053
		0.0971
		0.0387
		0.0756
		0.0462
		0.0769
		0.1032
		0.1266
		0.1473
		0.1574
		0.0886
		0.1037
		0.1045
		0.0387
		0.0978
		0.1174
		0.074
		0.1148
		0.1594
		0.1406
		0.1076
		0.1555
		0.1548

## Sheet: EDF 5c
	sampleID	TCGA_Study_with_HPV_Results_where_Available	sample_type	HPV
1	s17489	TCGA-OV	Primary Tumor	1.81647
2	s17512	TCGA-OV	Primary Tumor	4.70017
3	s17498	TCGA-OV	Primary Tumor	4.2387
4	s17535	TCGA-OV	Primary Tumor	3.25736
5	s17482	TCGA-OV	Blood Derived Normal	0.373412
6	s17490	TCGA-OV	Primary Tumor	1.72708
7	s17541	TCGA-OV	Primary Tumor	3.17615
8	s17499	TCGA-OV	Primary Tumor	0.0384077
9	s17500	TCGA-OV	Primary Tumor	2.65792
10	s17545	TCGA-OV	Primary Tumor	-1.34447
11	s17516	TCGA-OV	Primary Tumor	3.11979
12	s17480	TCGA-OV	Blood Derived Normal	0.982185
13	s17483	TCGA-OV	Blood Derived Normal	2.17271
14	s17484	TCGA-OV	Primary Tumor	-2.6014
15	s17525	TCGA-OV	Primary Tumor	0.97172
16	s17513	TCGA-OV	Primary Tumor	1.67289
17	s17495	TCGA-OV	Primary Tumor	-2.93625
18	s17537	TCGA-OV	Primary Tumor	3.77646
19	s17493	TCGA-OV	Primary Tumor	1.58852
20	s17511	TCGA-OV	Primary Tumor	-1.83027
21	s17520	TCGA-OV	Primary Tumor	3.41596
22	s17486	TCGA-OV	Primary Tumor	1.8532
23	s17494	TCGA-OV	Primary Tumor	5.49947
24	s17540	TCGA-OV	Primary Tumor	5.20899
25	s17530	TCGA-OV	Primary Tumor	2.66346
26	s17543	TCGA-OV	Primary Tumor	-0.568793
27	s17531	TCGA-OV	Primary Tumor	2.27261
28	s17523	TCGA-OV	Primary Tumor	0.720525
29	s17522	TCGA-OV	Primary Tumor	5.5341
30	s17526	TCGA-OV	Primary Tumor	2.04726
31	s17505	TCGA-OV	Primary Tumor	2.01808
32	s17496	TCGA-OV	Primary Tumor	1.38438
33	s17501	TCGA-OV	Primary Tumor	-2.29223
34	s17497	TCGA-OV	Primary Tumor	-2.7568
35	s17527	TCGA-OV	Primary Tumor	2.00078
36	s17492	TCGA-OV	Primary Tumor	2.93089
37	s17546	TCGA-OV	Primary Tumor	-0.313295
38	s17524	TCGA-OV	Primary Tumor	2.29601
39	s17491	TCGA-OV	Primary Tumor	4.75058
40	s17487	TCGA-OV	Primary Tumor	-2.41467
41	s17517	TCGA-OV	Primary Tumor	1.15064
42	s17506	TCGA-OV	Primary Tumor	-1.97458
43	s17536	TCGA-OV	Primary Tumor	2.94165
44	s17518	TCGA-OV	Primary Tumor	0.4102
45	s17519	TCGA-OV	Primary Tumor	5.76734
46	s17507	TCGA-OV	Primary Tumor	-2.65765
47	s17532	TCGA-OV	Blood Derived Normal	0.534864
48	s17508	TCGA-OV	Blood Derived Normal	0.178888
49	s17481	TCGA-OV	Primary Tumor	1.54369
50	s17514	TCGA-OV	Primary Tumor	1.37062
51	s17478	TCGA-OV	Primary Tumor	2.76641
52	s17485	TCGA-OV	Primary Tumor	4.08578
53	s17479	TCGA-OV	Blood Derived Normal	3.18104
54	s17503	TCGA-OV	Primary Tumor	3.55149
55	s17542	TCGA-OV	Primary Tumor	3.62243
56	s17538	TCGA-OV	Primary Tumor	0.813342
57	s17534	TCGA-OV	Primary Tumor	0.280784
58	s17515	TCGA-OV	Primary Tumor	-0.0233401
59	s17539	TCGA-OV	Primary Tumor	4.42001
60	s17509	TCGA-OV	Primary Tumor	4.69538
61	s17510	TCGA-OV	Blood Derived Normal	0.441739
62	s17521	TCGA-OV	Primary Tumor	-0.84322
63	s17488	TCGA-OV	Primary Tumor	3.54113
64	s17504	TCGA-OV	Primary Tumor	2.04235
65	s17719	TCGA-OV	Primary Tumor	3.32271
66	s17718	TCGA-OV	Primary Tumor	4.54552
67	s17708	TCGA-OV	Solid Tissue Normal	2.50228
68	s17717	TCGA-OV	Primary Tumor	5.25682
69	s17716	TCGA-OV	Primary Tumor	0.462432
70	s17735	TCGA-OV	Primary Tumor	3.20839
71	s17712	TCGA-OV	Primary Tumor	0.966155
72	s17707	TCGA-OV	Blood Derived Normal	1.19254
73	s17714	TCGA-OV	Primary Tumor	4.30761
74	s17721	TCGA-OV	Solid Tissue Normal	1.78051
75	s17727	TCGA-OV	Primary Tumor	4.61812
76	s17709	TCGA-OV	Blood Derived Normal	1.34706
77	s17706	TCGA-OV	Primary Tumor	2.62161
78	s17731	TCGA-OV	Primary Tumor	-0.857313
79	s17713	TCGA-OV	Primary Tumor	2.14624
80	s17725	TCGA-OV	Primary Tumor	3.71118
81	s17730	TCGA-OV	Primary Tumor	3.98035
82	s17728	TCGA-OV	Primary Tumor	-2.17933
83	s17710	TCGA-OV	Solid Tissue Normal	2.39057
84	s17720	TCGA-OV	Primary Tumor	-1.74542
85	s17715	TCGA-OV	Primary Tumor	3.15509
86	s17724	TCGA-OV	Primary Tumor	3.83851
87	s17722	TCGA-OV	Primary Tumor	7.14884
88	s17734	TCGA-OV	Primary Tumor	6.16483
89	s17732	TCGA-OV	Solid Tissue Normal	2.97056
90	s17711	TCGA-OV	Blood Derived Normal	3.41769
91	s17723	TCGA-OV	Primary Tumor	2.68335
92	s17733	TCGA-OV	Primary Tumor	4.21119
93	s17729	TCGA-OV	Primary Tumor	1.0434
94	s17116	TCGA-OV	Primary Tumor	-1.0401
95	s17126	TCGA-OV	Primary Tumor	0.785454
96	s17132	TCGA-OV	Primary Tumor	4.38125
97	s17123	TCGA-OV	Primary Tumor	0.967001
98	s17137	TCGA-OV	Primary Tumor	0.438209
99	s17125	TCGA-OV	Blood Derived Normal	1.47756
100	s17127	TCGA-OV	Primary Tumor	-2.99153
101	s17133	TCGA-OV	Primary Tumor	-0.0122701
102	s17119	TCGA-OV	Primary Tumor	2.59123
103	s17138	TCGA-OV	Primary Tumor	5.05032
104	s17141	TCGA-OV	Primary Tumor	4.78126
105	s17122	TCGA-OV	Blood Derived Normal	2.18998
106	s17129	TCGA-OV	Primary Tumor	0.998799
107	s17140	TCGA-OV	Primary Tumor	-1.11745
108	s17145	TCGA-OV	Primary Tumor	1.24637
109	s17139	TCGA-OV	Blood Derived Normal	1.29209
110	s17142	TCGA-OV	Primary Tumor	2.30074
111	s17115	TCGA-OV	Blood Derived Normal	1.659
112	s17131	TCGA-OV	Primary Tumor	1.08994
113	s17135	TCGA-OV	Primary Tumor	5.54809
114	s17134	TCGA-OV	Primary Tumor	4.61704
115	s17120	TCGA-OV	Primary Tumor	0.181142
116	s17121	TCGA-OV	Primary Tumor	6.25086
117	s17130	TCGA-OV	Primary Tumor	3.23653
118	s17113	TCGA-OV	Primary Tumor	3.19911
119	s17112	TCGA-OV	Blood Derived Normal	2.11711
120	s17118	TCGA-OV	Primary Tumor	4.78299
121	s17146	TCGA-OV	Primary Tumor	3.49255
122	s17114	TCGA-OV	Blood Derived Normal	3.84903
123	s17124	TCGA-OV	Primary Tumor	2.96999
124	s17128	TCGA-OV	Primary Tumor	-2.00424
125	s17136	TCGA-OV	Primary Tumor	0.0386729
126	s17143	TCGA-OV	Solid Tissue Normal	2.88318
127	s17117	TCGA-OV	Primary Tumor	-3.32863
128	s17862	TCGA-OV	Primary Tumor	-0.388027
129	s17871	TCGA-OV	Primary Tumor	2.58204
130	s17865	TCGA-OV	Primary Tumor	2.28131
131	s17880	TCGA-OV	Primary Tumor	2.03445
132	s17886	TCGA-OV	Primary Tumor	3.38243
133	s17869	TCGA-OV	Primary Tumor	1.90247
134	s17878	TCGA-OV	Primary Tumor	1.54639
135	s17885	TCGA-OV	Primary Tumor	-1.7022
136	s17876	TCGA-OV	Primary Tumor	4.04834
137	s17874	TCGA-OV	Primary Tumor	0.521584
138	s17884	TCGA-OV	Primary Tumor	2.47567
139	s17867	TCGA-OV	Primary Tumor	0.769774
140	s17861	TCGA-OV	Primary Tumor	2.55555
141	s17888	TCGA-OV	Primary Tumor	5.32688
142	s17864	TCGA-OV	Primary Tumor	1.52977
143	s17887	TCGA-OV	Primary Tumor	3.48789
144	s17873	TCGA-OV	Primary Tumor	2.74942
145	s17882	TCGA-OV	Primary Tumor	2.66914
146	s17879	TCGA-OV	Primary Tumor	1.58184
147	s17872	TCGA-OV	Primary Tumor	5.41311
148	s17870	TCGA-OV	Primary Tumor	3.04041
149	s17866	TCGA-OV	Primary Tumor	1.0678
150	s17863	TCGA-OV	Primary Tumor	3.18823
151	s17877	TCGA-OV	Primary Tumor	-2.41385
152	s17868	TCGA-OV	Blood Derived Normal	2.9429
153	s17881	TCGA-OV	Primary Tumor	1.89031
154	s17875	TCGA-OV	Primary Tumor	4.41366
155	s17283	TCGA-OV	Primary Tumor	0.00878703
156	s17312	TCGA-OV	Primary Tumor	5.04649
157	s17289	TCGA-OV	Primary Tumor	3.79697
158	s17295	TCGA-OV	Primary Tumor	5.41678
159	s17286	TCGA-OV	Primary Tumor	2.10088
160	s17318	TCGA-OV	Primary Tumor	1.58716
161	s17322	TCGA-OV	Primary Tumor	1.31415
162	s17290	TCGA-OV	Primary Tumor	4.97656
163	s17314	TCGA-OV	Primary Tumor	-1.75047
164	s17305	TCGA-OV	Primary Tumor	6.42882
165	s17313	TCGA-OV	Primary Tumor	-1.1389
166	s17299	TCGA-OV	Primary Tumor	4.0153
167	s17301	TCGA-OV	Primary Tumor	1.64482
168	s17293	TCGA-OV	Primary Tumor	-1.85997
169	s17282	TCGA-OV	Primary Tumor	-0.59968
170	s17288	TCGA-OV	Primary Tumor	2.63889
171	s17280	TCGA-OV	Primary Tumor	1.29581
172	s17308	TCGA-OV	Primary Tumor	1.94845
173	s17296	TCGA-OV	Primary Tumor	4.29504
174	s17287	TCGA-OV	Primary Tumor	-2.32518
175	s17319	TCGA-OV	Primary Tumor	4.23715
176	s17309	TCGA-OV	Primary Tumor	3.87077
177	s17284	TCGA-OV	Primary Tumor	-1.38159
178	s17291	TCGA-OV	Primary Tumor	0.682376
179	s17298	TCGA-OV	Primary Tumor	3.04414
180	s17292	TCGA-OV	Primary Tumor	-3.14212
181	s17281	TCGA-OV	Primary Tumor	3.88894
182	s17306	TCGA-OV	Primary Tumor	0.556768
183	s17307	TCGA-OV	Primary Tumor	-1.675
184	s17321	TCGA-OV	Primary Tumor	2.70997
185	s17303	TCGA-OV	Primary Tumor	0.605793
186	s17297	TCGA-OV	Primary Tumor	-2.39396
187	s17317	TCGA-OV	Primary Tumor	4.82547
188	s17300	TCGA-OV	Primary Tumor	1.64317
189	s17285	TCGA-OV	Primary Tumor	4.8519
190	s17310	TCGA-OV	Primary Tumor	-1.31933
191	s17320	TCGA-OV	Primary Tumor	1.94465
192	s17304	TCGA-OV	Primary Tumor	-1.76901
193	s17302	TCGA-OV	Primary Tumor	1.41694
194	s17294	TCGA-OV	Blood Derived Normal	1.20441
195	s17741	TCGA-OV	Primary Tumor	2.7364
196	s17749	TCGA-OV	Primary Tumor	1.09612
197	s17755	TCGA-OV	Primary Tumor	2.0069
198	s17744	TCGA-OV	Primary Tumor	2.37246
199	s17758	TCGA-OV	Primary Tumor	-0.806366
200	s17745	TCGA-OV	Blood Derived Normal	4.5106
201	s17753	TCGA-OV	Blood Derived Normal	2.14839
202	s17740	TCGA-OV	Blood Derived Normal	0.835049
203	s17748	TCGA-OV	Primary Tumor	4.18444
204	s17742	TCGA-OV	Primary Tumor	3.68544
205	s17739	TCGA-OV	Primary Tumor	3.15131
206	s17759	TCGA-OV	Primary Tumor	-1.05156
207	s17736	TCGA-OV	Primary Tumor	-0.845312
208	s17743	TCGA-OV	Primary Tumor	2.32104
209	s17738	TCGA-OV	Primary Tumor	-2.4499
210	s17737	TCGA-OV	Primary Tumor	-1.96442
211	s17754	TCGA-OV	Primary Tumor	-1.64547
212	s17752	TCGA-OV	Primary Tumor	2.2128
213	s17756	TCGA-OV	Primary Tumor	4.25032
214	s17751	TCGA-OV	Blood Derived Normal	2.54952
215	s17757	TCGA-OV	Primary Tumor	-0.510257
216	s17747	TCGA-OV	Primary Tumor	3.85406
217	s17750	TCGA-OV	Primary Tumor	-0.671475
218	s17746	TCGA-OV	Primary Tumor	3.47347
219	s17154	TCGA-OV	Primary Tumor	4.88471
220	s17157	TCGA-OV	Primary Tumor	-0.229362
221	s17149	TCGA-OV	Primary Tumor	3.3998
222	s17160	TCGA-OV	Primary Tumor	0.427926
223	s17163	TCGA-OV	Primary Tumor	2.36779
224	s17148	TCGA-OV	Primary Tumor	5.41924
225	s17161	TCGA-OV	Primary Tumor	3.9479
226	s17158	TCGA-OV	Primary Tumor	0.79723
227	s17155	TCGA-OV	Primary Tumor	4.0232
228	s17156	TCGA-OV	Primary Tumor	1.67739
229	s17162	TCGA-OV	Primary Tumor	1.76129
230	s17153	TCGA-OV	Primary Tumor	6.92532
231	s17147	TCGA-OV	Primary Tumor	1.79353
232	s17152	TCGA-OV	Primary Tumor	5.28001
233	s17151	TCGA-OV	Primary Tumor	4.70776
234	s17150	TCGA-OV	Primary Tumor	5.25152
235	s17910	TCGA-OV	Primary Tumor	1.50862
236	s17920	TCGA-OV	Primary Tumor	1.57378
237	s17940	TCGA-OV	Primary Tumor	-0.0504329
238	s17976	TCGA-OV	Primary Tumor	5.2164
239	s17955	TCGA-OV	Primary Tumor	3.78389
240	s17917	TCGA-OV	Primary Tumor	2.53617
241	s17972	TCGA-OV	Primary Tumor	-1.08572
242	s17895	TCGA-OV	Primary Tumor	1.28668
243	s17924	TCGA-OV	Primary Tumor	2.64365
244	s17939	TCGA-OV	Primary Tumor	5.27263
245	s17960	TCGA-OV	Primary Tumor	4.32368
246	s17923	TCGA-OV	Primary Tumor	4.91624
247	s17906	TCGA-OV	Primary Tumor	3.27758
248	s17893	TCGA-OV	Primary Tumor	6.56659
249	s17942	TCGA-OV	Primary Tumor	3.86098
250	s17909	TCGA-OV	Primary Tumor	2.73764
251	s17954	TCGA-OV	Primary Tumor	0.547333
252	s17941	TCGA-OV	Primary Tumor	3.06943
253	s17949	TCGA-OV	Primary Tumor	3.39638
254	s17904	TCGA-OV	Primary Tumor	3.29725
255	s17902	TCGA-OV	Primary Tumor	4.12996
256	s17958	TCGA-OV	Primary Tumor	-2.24395
257	s17951	TCGA-OV	Primary Tumor	2.47225
258	s17950	TCGA-OV	Blood Derived Normal	1.3906
259	s17916	TCGA-OV	Primary Tumor	2.66124
260	s17969	TCGA-OV	Primary Tumor	0.743767
261	s17956	TCGA-OV	Primary Tumor	3.26113
262	s17925	TCGA-OV	Primary Tumor	4.96818
263	s17933	TCGA-OV	Primary Tumor	-2.41032
264	s17961	TCGA-OV	Blood Derived Normal	2.42597
265	s17935	TCGA-OV	Primary Tumor	1.1479
266	s17947	TCGA-OV	Primary Tumor	3.0001
267	s17897	TCGA-OV	Primary Tumor	5.78031
268	s17929	TCGA-OV	Primary Tumor	4.25206
269	s17975	TCGA-OV	Primary Tumor	5.62645
270	s17943	TCGA-OV	Primary Tumor	0.787506
271	s17977	TCGA-OV	Primary Tumor	3.76261
272	s17974	TCGA-OV	Primary Tumor	5.1264
273	s17911	TCGA-OV	Primary Tumor	-0.0291175
274	s17891	TCGA-OV	Primary Tumor	2.13035
275	s17938	TCGA-OV	Primary Tumor	2.99465
276	s17970	TCGA-OV	Primary Tumor	0.874339
277	s17953	TCGA-OV	Primary Tumor	-0.709308
278	s17914	TCGA-OV	Primary Tumor	4.97743
279	s17898	TCGA-OV	Primary Tumor	3.37369
280	s17965	TCGA-OV	Primary Tumor	-0.740419
281	s17912	TCGA-OV	Primary Tumor	3.38938
282	s17903	TCGA-OV	Primary Tumor	1.25388
283	s17900	TCGA-OV	Primary Tumor	3.69188
284	s17934	TCGA-OV	Primary Tumor	2.99991
285	s17936	TCGA-OV	Primary Tumor	2.40721
286	s17892	TCGA-OV	Primary Tumor	4.75004
287	s17966	TCGA-OV	Primary Tumor	1.37764
288	s17944	TCGA-OV	Primary Tumor	0.949729
289	s17889	TCGA-OV	Primary Tumor	0.237898
290	s17973	TCGA-OV	Primary Tumor	-0.787404
291	s17913	TCGA-OV	Primary Tumor	2.78726
292	s17952	TCGA-OV	Primary Tumor	4.91948
293	s17921	TCGA-OV	Primary Tumor	-2.55397
294	s17907	TCGA-OV	Primary Tumor	5.19595
295	s17946	TCGA-OV	Primary Tumor	3.98854
296	s17926	TCGA-OV	Primary Tumor	4.5091
297	s17948	TCGA-OV	Primary Tumor	3.29374
298	s17927	TCGA-OV	Primary Tumor	4.25096
299	s17963	TCGA-OV	Primary Tumor	4.42326
300	s17937	TCGA-OV	Primary Tumor	3.93093
301	s17971	TCGA-OV	Primary Tumor	4.41782
302	s17945	TCGA-OV	Primary Tumor	4.97261
303	s17905	TCGA-OV	Primary Tumor	5.59573
304	s17928	TCGA-OV	Primary Tumor	3.32421
305	s17896	TCGA-OV	Primary Tumor	5.87853
306	s17967	TCGA-OV	Primary Tumor	-1.27679
307	s17890	TCGA-OV	Primary Tumor	-2.85424
308	s17908	TCGA-OV	Primary Tumor	2.91114
309	s17968	TCGA-OV	Primary Tumor	-1.48546
310	s17894	TCGA-OV	Primary Tumor	3.60542
311	s17918	TCGA-OV	Primary Tumor	1.20006
312	s17931	TCGA-OV	Primary Tumor	-2.04249
313	s17932	TCGA-OV	Primary Tumor	1.20662
314	s17915	TCGA-OV	Primary Tumor	7.61767
315	s17899	TCGA-OV	Solid Tissue Normal	2.4738
316	s17922	TCGA-OV	Primary Tumor	0.196395
317	s17962	TCGA-OV	Primary Tumor	5.77826
318	s17901	TCGA-OV	Primary Tumor	2.85499
319	s17957	TCGA-OV	Primary Tumor	5.60202
320	s17919	TCGA-OV	Primary Tumor	3.8216
321	s17964	TCGA-OV	Primary Tumor	1.80093
322	s17930	TCGA-OV	Primary Tumor	4.22091
323	s17325	TCGA-OV	Primary Tumor	3.43505
324	s17331	TCGA-OV	Primary Tumor	0.190995
325	s17343	TCGA-OV	Primary Tumor	4.54049
326	s17328	TCGA-OV	Primary Tumor	4.41804
327	s17341	TCGA-OV	Primary Tumor	4.47469
328	s17342	TCGA-OV	Primary Tumor	3.73272
329	s17338	TCGA-OV	Primary Tumor	-3.6516
330	s17333	TCGA-OV	Primary Tumor	3.29748
331	s17329	TCGA-OV	Primary Tumor	-3.16255
332	s17324	TCGA-OV	Primary Tumor	0.744485
333	s17344	TCGA-OV	Blood Derived Normal	1.83596
334	s17335	TCGA-OV	Primary Tumor	2.24836
335	s17332	TCGA-OV	Primary Tumor	1.13315
336	s17326	TCGA-OV	Primary Tumor	6.2274
337	s17346	TCGA-OV	Primary Tumor	1.11135
338	s17336	TCGA-OV	Primary Tumor	3.0953
339	s17323	TCGA-OV	Solid Tissue Normal	1.01051
340	s17340	TCGA-OV	Primary Tumor	4.27208
341	s17347	TCGA-OV	Primary Tumor	0.951858
342	s17557	TCGA-OV	Primary Tumor	2.89291
343	s17547	TCGA-OV	Blood Derived Normal	2.67317
344	s17570	TCGA-OV	Primary Tumor	1.39967
345	s17581	TCGA-OV	Primary Tumor	-0.130519
346	s17584	TCGA-OV	Primary Tumor	4.5136
347	s17585	TCGA-OV	Primary Tumor	4.30349
348	s17580	TCGA-OV	Primary Tumor	0.895719
349	s17571	TCGA-OV	Primary Tumor	0.0830542
350	s17561	TCGA-OV	Primary Tumor	2.57959
351	s17554	TCGA-OV	Primary Tumor	4.19575
352	s17569	TCGA-OV	Primary Tumor	4.39925
353	s17573	TCGA-OV	Primary Tumor	5.32151
354	s17550	TCGA-OV	Primary Tumor	1.98005
355	s17583	TCGA-OV	Primary Tumor	-1.5607
356	s17578	TCGA-OV	Primary Tumor	1.43754
357	s17565	TCGA-OV	Primary Tumor	-2.24233
358	s17549	TCGA-OV	Blood Derived Normal	0.215246
359	s17577	TCGA-OV	Primary Tumor	-1.63489
360	s17551	TCGA-OV	Blood Derived Normal	1.04937
361	s17567	TCGA-OV	Primary Tumor	3.65703
362	s17576	TCGA-OV	Primary Tumor	4.83057
363	s17579	TCGA-OV	Blood Derived Normal	2.36186
364	s17568	TCGA-OV	Primary Tumor	1.7952
365	s17572	TCGA-OV	Primary Tumor	0.634717
366	s17586	TCGA-OV	Blood Derived Normal	3.62481
367	s17548	TCGA-OV	Blood Derived Normal	-0.885243
368	s17560	TCGA-OV	Primary Tumor	4.47688
369	s17558	TCGA-OV	Blood Derived Normal	-0.712312
370	s17556	TCGA-OV	Primary Tumor	3.33092
371	s17574	TCGA-OV	Primary Tumor	1.34854
372	s17575	TCGA-OV	Primary Tumor	3.24865
373	s17564	TCGA-OV	Primary Tumor	2.38184
374	s17582	TCGA-OV	Primary Tumor	3.04677
375	s17552	TCGA-OV	Primary Tumor	4.51324
376	s17559	TCGA-OV	Primary Tumor	1.48408
377	s17566	TCGA-OV	Primary Tumor	3.16409
378	s17664	TCGA-OV	Primary Tumor	-2.01058
379	s17698	TCGA-OV	Primary Tumor	2.50566
380	s17663	TCGA-OV	Primary Tumor	2.88741
381	s17670	TCGA-OV	Primary Tumor	5.96091
382	s17672	TCGA-OV	Primary Tumor	1.107
383	s17690	TCGA-OV	Primary Tumor	1.88867
384	s17656	TCGA-OV	Primary Tumor	4.75589
385	s17654	TCGA-OV	Primary Tumor	-0.359293
386	s17653	TCGA-OV	Primary Tumor	-3.46484
387	s17679	TCGA-OV	Primary Tumor	0.085006
388	s17673	TCGA-OV	Blood Derived Normal	1.94276
389	s17665	TCGA-OV	Primary Tumor	0.28822
390	s17702	TCGA-OV	Primary Tumor	3.07096
391	s17677	TCGA-OV	Blood Derived Normal	1.45864
392	s17657	TCGA-OV	Primary Tumor	2.97372
393	s17668	TCGA-OV	Primary Tumor	2.40377
394	s17678	TCGA-OV	Primary Tumor	1.07744
395	s17675	TCGA-OV	Primary Tumor	3.94796
396	s17682	TCGA-OV	Primary Tumor	-1.33937
397	s17691	TCGA-OV	Primary Tumor	-1.1182
398	s17661	TCGA-OV	Primary Tumor	2.09299
399	s17652	TCGA-OV	Blood Derived Normal	1.59253
400	s17674	TCGA-OV	Primary Tumor	-2.43806
401	s17686	TCGA-OV	Primary Tumor	1.52519
402	s17659	TCGA-OV	Primary Tumor	5.30601
403	s17692	TCGA-OV	Primary Tumor	-0.0839692
404	s17687	TCGA-OV	Primary Tumor	4.14786
405	s17685	TCGA-OV	Primary Tumor	2.34445
406	s17671	TCGA-OV	Primary Tumor	6.00003
407	s17666	TCGA-OV	Primary Tumor	2.43423
408	s17700	TCGA-OV	Primary Tumor	-0.280971
409	s17669	TCGA-OV	Primary Tumor	4.58621
410	s17704	TCGA-OV	Primary Tumor	5.97883
411	s17660	TCGA-OV	Primary Tumor	3.74134
412	s17688	TCGA-OV	Primary Tumor	2.06214
413	s17693	TCGA-OV	Primary Tumor	0.0389543
414	s17701	TCGA-OV	Solid Tissue Normal	3.13461
415	s17683	TCGA-OV	Primary Tumor	1.41829
416	s17676	TCGA-OV	Primary Tumor	1.36995
417	s17697	TCGA-OV	Primary Tumor	5.26046
418	s17658	TCGA-OV	Primary Tumor	2.05286
419	s17655	TCGA-OV	Primary Tumor	-3.41034
420	s17699	TCGA-OV	Primary Tumor	-1.02276
421	s17680	TCGA-OV	Primary Tumor	2.58263
422	s17694	TCGA-OV	Primary Tumor	4.12884
423	s17662	TCGA-OV	Primary Tumor	0.823229
424	s17695	TCGA-OV	Primary Tumor	0.272007
425	s17667	TCGA-OV	Primary Tumor	6.72576
426	s17684	TCGA-OV	Primary Tumor	3.76617
427	s17705	TCGA-OV	Primary Tumor	4.64706
428	s17681	TCGA-OV	Primary Tumor	5.31908
429	s17696	TCGA-OV	Primary Tumor	3.42423
430	s18083	TCGA-OV	Blood Derived Normal	3.13608
431	s18108	TCGA-OV	Primary Tumor	2.25323
432	s18137	TCGA-OV	Primary Tumor	4.50259
433	s18125	TCGA-OV	Primary Tumor	1.20483
434	s18119	TCGA-OV	Primary Tumor	0.951068
435	s18130	TCGA-OV	Primary Tumor	-1.11975
436	s18116	TCGA-OV	Blood Derived Normal	0.570413
437	s18086	TCGA-OV	Blood Derived Normal	-2.25282
438	s18111	TCGA-OV	Primary Tumor	4.02956
439	s18114	TCGA-OV	Primary Tumor	-0.105696
440	s18102	TCGA-OV	Primary Tumor	4.80699
441	s18093	TCGA-OV	Primary Tumor	-1.83229
442	s18132	TCGA-OV	Primary Tumor	2.14008
443	s18131	TCGA-OV	Blood Derived Normal	1.60068
444	s18140	TCGA-OV	Primary Tumor	4.10473
445	s18099	TCGA-OV	Primary Tumor	-1.73619
446	s18144	TCGA-OV	Primary Tumor	-0.390977
447	s18088	TCGA-OV	Primary Tumor	-3.28542
448	s18112	TCGA-OV	Primary Tumor	2.63842
449	s18090	TCGA-OV	Primary Tumor	0.139303
450	s18136	TCGA-OV	Primary Tumor	-0.516955
451	s18107	TCGA-OV	Primary Tumor	1.87623
452	s18129	TCGA-OV	Primary Tumor	4.09386
453	s18084	TCGA-OV	Primary Tumor	-2.35438
454	s18139	TCGA-OV	Primary Tumor	-1.81315
455	s18123	TCGA-OV	Primary Tumor	2.97732
456	s18138	TCGA-OV	Primary Tumor	5.95617
457	s18143	TCGA-OV	Primary Tumor	2.50226
458	s18121	TCGA-OV	Primary Tumor	5.67575
459	s18091	TCGA-OV	Primary Tumor	6.46181
460	s18128	TCGA-OV	Primary Tumor	-0.816746
461	s18127	TCGA-OV	Primary Tumor	3.98757
462	s18122	TCGA-OV	Primary Tumor	-2.22735
463	s18135	TCGA-OV	Primary Tumor	4.30839
464	s18126	TCGA-OV	Primary Tumor	0.857076
465	s18118	TCGA-OV	Primary Tumor	3.86371
466	s18145	TCGA-OV	Primary Tumor	1.2835
467	s18101	TCGA-OV	Primary Tumor	4.59554
468	s18113	TCGA-OV	Primary Tumor	0.164676
469	s18133	TCGA-OV	Primary Tumor	0.837684
470	s18142	TCGA-OV	Primary Tumor	-1.02937
471	s18124	TCGA-OV	Primary Tumor	4.17069
472	s18094	TCGA-OV	Primary Tumor	4.53838
473	s18134	TCGA-OV	Primary Tumor	-1.64057
474	s18106	TCGA-OV	Primary Tumor	2.45
475	s18110	TCGA-OV	Primary Tumor	4.34496
476	s18141	TCGA-OV	Primary Tumor	3.24345
477	s18100	TCGA-OV	Primary Tumor	5.46911
478	s18081	TCGA-OV	Primary Tumor	1.71741
479	s18146	TCGA-OV	Primary Tumor	3.75614
480	s18120	TCGA-OV	Primary Tumor	1.2923
481	s18115	TCGA-OV	Primary Tumor	-1.95759
482	s18105	TCGA-OV	Primary Tumor	0.212296
483	s18085	TCGA-OV	Primary Tumor	0.577683
484	s18096	TCGA-OV	Primary Tumor	1.64729
485	s18109	TCGA-OV	Primary Tumor	-2.62431
486	s18095	TCGA-OV	Primary Tumor	4.66053
487	s18089	TCGA-OV	Blood Derived Normal	3.68313
488	s18082	TCGA-OV	Primary Tumor	2.88777
489	s18097	TCGA-OV	Primary Tumor	1.31519
490	s18087	TCGA-OV	Primary Tumor	3.40796
491	s18098	TCGA-OV	Primary Tumor	2.63327
492	s18117	TCGA-OV	Primary Tumor	1.27457
493	s17211	TCGA-OV	Primary Tumor	-1.31119
494	s17224	TCGA-OV	Primary Tumor	1.55242
495	s17264	TCGA-OV	Primary Tumor	-0.910228
496	s17230	TCGA-OV	Primary Tumor	1.55237
497	s17260	TCGA-OV	Primary Tumor	1.70814
498	s17279	TCGA-OV	Primary Tumor	5.2001
499	s17209	TCGA-OV	Primary Tumor	3.74261
500	s17266	TCGA-OV	Primary Tumor	3.39582
501	s17275	TCGA-OV	Primary Tumor	2.34574
502	s17270	TCGA-OV	Primary Tumor	5.53574
503	s17263	TCGA-OV	Primary Tumor	4.22445
504	s17204	TCGA-OV	Blood Derived Normal	1.8903
505	s17267	TCGA-OV	Primary Tumor	-1.6344
506	s17248	TCGA-OV	Primary Tumor	2.77481
507	s17236	TCGA-OV	Primary Tumor	2.62408
508	s17232	TCGA-OV	Primary Tumor	0.966853
509	s17239	TCGA-OV	Primary Tumor	4.80486
510	s17262	TCGA-OV	Primary Tumor	-1.28809
511	s17272	TCGA-OV	Primary Tumor	6.22938
512	s17258	TCGA-OV	Primary Tumor	1.88599
513	s17227	TCGA-OV	Primary Tumor	3.38642
514	s17234	TCGA-OV	Primary Tumor	2.54527
515	s17208	TCGA-OV	Primary Tumor	0.578201
516	s17276	TCGA-OV	Primary Tumor	2.52407
517	s17250	TCGA-OV	Primary Tumor	2.42847
518	s17219	TCGA-OV	Primary Tumor	-0.155905
519	s17205	TCGA-OV	Solid Tissue Normal	-2.22419
520	s17217	TCGA-OV	Primary Tumor	3.62416
521	s17243	TCGA-OV	Primary Tumor	2.95495
522	s17252	TCGA-OV	Primary Tumor	6.23881
523	s17271	TCGA-OV	Primary Tumor	3.59003
524	s17223	TCGA-OV	Primary Tumor	2.50769
525	s17226	TCGA-OV	Primary Tumor	4.54114
526	s17257	TCGA-OV	Primary Tumor	-1.69556
527	s17207	TCGA-OV	Solid Tissue Normal	-0.0839586
528	s17259	TCGA-OV	Primary Tumor	2.22648
529	s17237	TCGA-OV	Primary Tumor	0.261707
530	s17241	TCGA-OV	Primary Tumor	5.19941
531	s17240	TCGA-OV	Primary Tumor	4.00236
532	s17242	TCGA-OV	Primary Tumor	1.58867
533	s17216	TCGA-OV	Primary Tumor	6.3849
534	s17249	TCGA-OV	Primary Tumor	2.06285
535	s17233	TCGA-OV	Primary Tumor	-1.74955
536	s17255	TCGA-OV	Primary Tumor	0.726759
537	s17213	TCGA-OV	Primary Tumor	3.10862
538	s17268	TCGA-OV	Primary Tumor	3.37031
539	s17244	TCGA-OV	Primary Tumor	-1.40667
540	s17269	TCGA-OV	Primary Tumor	0.985212
541	s17254	TCGA-OV	Primary Tumor	1.75135
542	s17212	TCGA-OV	Primary Tumor	-1.84391
543	s17206	TCGA-OV	Primary Tumor	-2.64033
544	s17214	TCGA-OV	Primary Tumor	6.25248
545	s17278	TCGA-OV	Primary Tumor	4.13627
546	s17229	TCGA-OV	Primary Tumor	4.06061
547	s17274	TCGA-OV	Primary Tumor	5.39603
548	s17218	TCGA-OV	Primary Tumor	2.86195
549	s17225	TCGA-OV	Primary Tumor	0.172011
550	s17221	TCGA-OV	Primary Tumor	4.69841
551	s17256	TCGA-OV	Primary Tumor	-1.13699
552	s17277	TCGA-OV	Primary Tumor	1.62477
553	s17210	TCGA-OV	Primary Tumor	3.68478
554	s17222	TCGA-OV	Primary Tumor	3.18524
555	s17247	TCGA-OV	Primary Tumor	4.03914
556	s17220	TCGA-OV	Primary Tumor	4.10338
557	s17246	TCGA-OV	Primary Tumor	-0.96145
558	s17235	TCGA-OV	Primary Tumor	2.62501
559	s17231	TCGA-OV	Primary Tumor	3.36393
560	s17261	TCGA-OV	Primary Tumor	3.93428
561	s17215	TCGA-OV	Primary Tumor	2.51451
562	s17228	TCGA-OV	Primary Tumor	5.2415
563	s17203	TCGA-OV	Blood Derived Normal	1.38353
564	s17251	TCGA-OV	Primary Tumor	2.86529
565	s17238	TCGA-OV	Primary Tumor	0.186036
566	s17253	TCGA-OV	Primary Tumor	2.34687
567	s17273	TCGA-OV	Primary Tumor	0.256184
568	s17245	TCGA-OV	Primary Tumor	-1.88707
569	s17855	TCGA-OV	Primary Tumor	0.959627
570	s17819	TCGA-OV	Primary Tumor	5.13777
571	s17858	TCGA-OV	Primary Tumor	-0.693345
572	s17800	TCGA-OV	Primary Tumor	2.21919
573	s17833	TCGA-OV	Primary Tumor	4.13625
574	s17840	TCGA-OV	Primary Tumor	1.21418
575	s17853	TCGA-OV	Primary Tumor	4.32879
576	s17850	TCGA-OV	Primary Tumor	1.30469
577	s17828	TCGA-OV	Primary Tumor	3.21963
578	s17845	TCGA-OV	Primary Tumor	4.5667
579	s17835	TCGA-OV	Primary Tumor	0.744902
580	s17814	TCGA-OV	Primary Tumor	2.9623
581	s17825	TCGA-OV	Primary Tumor	-2.08475
582	s17826	TCGA-OV	Primary Tumor	-1.91962
583	s17801	TCGA-OV	Primary Tumor	1.84322
584	s17812	TCGA-OV	Primary Tumor	4.49208
585	s17821	TCGA-OV	Primary Tumor	5.35284
586	s17816	TCGA-OV	Primary Tumor	2.59364
587	s17808	TCGA-OV	Primary Tumor	0.60423
588	s17822	TCGA-OV	Primary Tumor	2.86685
589	s17803	TCGA-OV	Primary Tumor	-2.44579
590	s17844	TCGA-OV	Primary Tumor	2.09747
591	s17848	TCGA-OV	Primary Tumor	4.57804
592	s17810	TCGA-OV	Primary Tumor	-1.13099
593	s17834	TCGA-OV	Primary Tumor	0.602082
594	s17837	TCGA-OV	Primary Tumor	1.01501
595	s17854	TCGA-OV	Primary Tumor	4.54684
596	s17852	TCGA-OV	Blood Derived Normal	-1.97793
597	s17832	TCGA-OV	Primary Tumor	3.30255
598	s17829	TCGA-OV	Primary Tumor	4.79199
599	s17802	TCGA-OV	Primary Tumor	3.58758
600	s17859	TCGA-OV	Primary Tumor	3.70946
601	s17841	TCGA-OV	Primary Tumor	4.06786
602	s17827	TCGA-OV	Primary Tumor	0.190975
603	s17857	TCGA-OV	Primary Tumor	-0.845665
604	s17820	TCGA-OV	Primary Tumor	2.47819
605	s17804	TCGA-OV	Primary Tumor	-2.43711
606	s17851	TCGA-OV	Primary Tumor	0.110706
607	s17818	TCGA-OV	Primary Tumor	4.60527
608	s17847	TCGA-OV	Primary Tumor	4.42598
609	s17849	TCGA-OV	Primary Tumor	3.64908
610	s17830	TCGA-OV	Primary Tumor	4.59441
611	s17807	TCGA-OV	Primary Tumor	5.73834
612	s17843	TCGA-OV	Primary Tumor	5.08833
613	s17809	TCGA-OV	Primary Tumor	2.0131
614	s17846	TCGA-OV	Primary Tumor	5.31585
615	s17815	TCGA-OV	Primary Tumor	4.25207
616	s17831	TCGA-OV	Primary Tumor	-2.23042
617	s17824	TCGA-OV	Primary Tumor	3.07725
618	s17805	TCGA-OV	Primary Tumor	1.1844
619	s17839	TCGA-OV	Primary Tumor	5.348
620	s17811	TCGA-OV	Primary Tumor	4.60455
621	s17813	TCGA-OV	Primary Tumor	4.59367
622	s17842	TCGA-OV	Blood Derived Normal	4.00384
623	s17823	TCGA-OV	Primary Tumor	2.23942
624	s17838	TCGA-OV	Primary Tumor	5.65739
625	s17856	TCGA-OV	Primary Tumor	3.84897
626	s17806	TCGA-OV	Primary Tumor	4.17224
627	s17860	TCGA-OV	Primary Tumor	5.47303
628	s17425	TCGA-OV	Primary Tumor	2.16638
629	s17471	TCGA-OV	Primary Tumor	5.53035
630	s17474	TCGA-OV	Primary Tumor	4.2675
631	s17413	TCGA-OV	Primary Tumor	4.3731
632	s17455	TCGA-OV	Primary Tumor	1.08606
633	s17445	TCGA-OV	Primary Tumor	3.78268
634	s17430	TCGA-OV	Primary Tumor	5.56012
635	s17427	TCGA-OV	Primary Tumor	-2.08928
636	s17447	TCGA-OV	Primary Tumor	1.26531
637	s17466	TCGA-OV	Primary Tumor	-0.627515
638	s17433	TCGA-OV	Primary Tumor	1.13631
639	s17419	TCGA-OV	Primary Tumor	3.78519
640	s17424	TCGA-OV	Primary Tumor	2.72337
641	s17408	TCGA-OV	Blood Derived Normal	0.841838
642	s17467	TCGA-OV	Primary Tumor	-0.95127
643	s17416	TCGA-OV	Primary Tumor	5.08844
644	s17428	TCGA-OV	Primary Tumor	2.87268
645	s17420	TCGA-OV	Primary Tumor	3.5588
646	s17469	TCGA-OV	Primary Tumor	-0.99188
647	s17453	TCGA-OV	Blood Derived Normal	2.07942
648	s17462	TCGA-OV	Primary Tumor	4.72642
649	s17457	TCGA-OV	Primary Tumor	2.50767
650	s17477	TCGA-OV	Primary Tumor	1.12215
651	s17438	TCGA-OV	Primary Tumor	4.44377
652	s17429	TCGA-OV	Primary Tumor	4.75716
653	s17468	TCGA-OV	Primary Tumor	1.34337
654	s17405	TCGA-OV	Primary Tumor	4.17592
655	s17449	TCGA-OV	Primary Tumor	4.27481
656	s17475	TCGA-OV	Primary Tumor	5.67837
657	s17406	TCGA-OV	Primary Tumor	2.47912
658	s17421	TCGA-OV	Primary Tumor	4.01613
659	s17434	TCGA-OV	Primary Tumor	1.40783
660	s17465	TCGA-OV	Primary Tumor	2.4713
661	s17443	TCGA-OV	Primary Tumor	0.785767
662	s17476	TCGA-OV	Primary Tumor	5.52388
663	s17410	TCGA-OV	Blood Derived Normal	-2.75506
664	s17461	TCGA-OV	Primary Tumor	2.8863
665	s17432	TCGA-OV	Primary Tumor	1.84188
666	s17442	TCGA-OV	Primary Tumor	5.38812
667	s17440	TCGA-OV	Primary Tumor	-0.0820489
668	s17422	TCGA-OV	Primary Tumor	3.17598
669	s17451	TCGA-OV	Primary Tumor	1.21591
670	s17409	TCGA-OV	Primary Tumor	0.625728
671	s17431	TCGA-OV	Primary Tumor	2.22769
672	s17417	TCGA-OV	Primary Tumor	-3.58406
673	s17423	TCGA-OV	Primary Tumor	-2.88917
674	s17464	TCGA-OV	Primary Tumor	-2.34746
675	s17460	TCGA-OV	Primary Tumor	-0.493817
676	s17452	TCGA-OV	Primary Tumor	4.25749
677	s17437	TCGA-OV	Primary Tumor	0.397678
678	s17412	TCGA-OV	Primary Tumor	-1.55342
679	s17439	TCGA-OV	Primary Tumor	4.31614
680	s17454	TCGA-OV	Primary Tumor	-0.69171
681	s17472	TCGA-OV	Primary Tumor	2.5708
682	s17470	TCGA-OV	Primary Tumor	4.86719
683	s17414	TCGA-OV	Primary Tumor	1.3732
684	s17456	TCGA-OV	Primary Tumor	-1.45026
685	s17448	TCGA-OV	Primary Tumor	-1.83415
686	s17407	TCGA-OV	Blood Derived Normal	-2.46062
687	s17435	TCGA-OV	Primary Tumor	3.09071
688	s17426	TCGA-OV	Primary Tumor	-1.75887
689	s17436	TCGA-OV	Primary Tumor	0.572027
690	s17441	TCGA-OV	Primary Tumor	-1.69852
691	s17458	TCGA-OV	Primary Tumor	-1.84438
692	s17444	TCGA-OV	Primary Tumor	1.25206
693	s17411	TCGA-OV	Primary Tumor	3.22777
694	s17415	TCGA-OV	Primary Tumor	3.878
695	s17418	TCGA-OV	Primary Tumor	3.42287
696	s17446	TCGA-OV	Primary Tumor	3.95353
697	s17450	TCGA-OV	Primary Tumor	2.16323
698	s17463	TCGA-OV	Primary Tumor	0.18484
699	s17629	TCGA-OV	Primary Tumor	4.58642
700	s17615	TCGA-OV	Primary Tumor	-1.75886
701	s17605	TCGA-OV	Primary Tumor	4.25497
702	s17637	TCGA-OV	Primary Tumor	-1.04443
703	s17625	TCGA-OV	Primary Tumor	2.69981
704	s17620	TCGA-OV	Primary Tumor	-0.312848
705	s17631	TCGA-OV	Primary Tumor	4.08803
706	s17607	TCGA-OV	Primary Tumor	4.41925
707	s17642	TCGA-OV	Primary Tumor	4.54883
708	s17614	TCGA-OV	Blood Derived Normal	3.89589
709	s17612	TCGA-OV	Primary Tumor	-1.79993
710	s17651	TCGA-OV	Primary Tumor	2.80703
711	s17617	TCGA-OV	Primary Tumor	5.73264
712	s17610	TCGA-OV	Blood Derived Normal	1.77366
713	s17626	TCGA-OV	Primary Tumor	-1.54885
714	s17644	TCGA-OV	Primary Tumor	4.21536
715	s17622	TCGA-OV	Primary Tumor	2.35116
716	s17616	TCGA-OV	Primary Tumor	-2.1928
717	s17598	TCGA-OV	Primary Tumor	4.5993
718	s17623	TCGA-OV	Primary Tumor	0.806928
719	s17613	TCGA-OV	Primary Tumor	2.4398
720	s17600	TCGA-OV	Solid Tissue Normal	2.38643
721	s17591	TCGA-OV	Primary Tumor	-0.787118
722	s17588	TCGA-OV	Solid Tissue Normal	1.68136
723	s17608	TCGA-OV	Primary Tumor	0.310517
724	s17609	TCGA-OV	Primary Tumor	1.80766
725	s17635	TCGA-OV	Primary Tumor	5.12919
726	s17589	TCGA-OV	Blood Derived Normal	1.96205
727	s17603	TCGA-OV	Primary Tumor	3.44869
728	s17611	TCGA-OV	Primary Tumor	5.15836
729	s17602	TCGA-OV	Primary Tumor	1.01701
730	s17628	TCGA-OV	Primary Tumor	1.90576
731	s17648	TCGA-OV	Primary Tumor	4.88709
732	s17634	TCGA-OV	Primary Tumor	3.69764
733	s17640	TCGA-OV	Primary Tumor	4.81235
734	s17636	TCGA-OV	Primary Tumor	3.89309
735	s17606	TCGA-OV	Primary Tumor	0.915944
736	s17599	TCGA-OV	Primary Tumor	4.60921
737	s17597	TCGA-OV	Primary Tumor	1.67804
738	s17595	TCGA-OV	Primary Tumor	2.27968
739	s17630	TCGA-OV	Primary Tumor	4.28049
740	s17639	TCGA-OV	Primary Tumor	-0.857846
741	s17638	TCGA-OV	Primary Tumor	-1.29294
742	s17650	TCGA-OV	Primary Tumor	1.54703
743	s17649	TCGA-OV	Primary Tumor	1.21703
744	s17647	TCGA-OV	Primary Tumor	-1.47052
745	s17624	TCGA-OV	Primary Tumor	6.94427
746	s17641	TCGA-OV	Primary Tumor	1.98273
747	s17596	TCGA-OV	Primary Tumor	3.11131
748	s17590	TCGA-OV	Primary Tumor	-0.0653518
749	s17601	TCGA-OV	Primary Tumor	1.2905
750	s17627	TCGA-OV	Primary Tumor	2.30089
751	s17646	TCGA-OV	Primary Tumor	4.29339
752	s17633	TCGA-OV	Primary Tumor	1.62757
753	s17592	TCGA-OV	Primary Tumor	0.310661
754	s17587	TCGA-OV	Primary Tumor	4.23569
755	s17593	TCGA-OV	Primary Tumor	5.64223
756	s17618	TCGA-OV	Primary Tumor	2.28296
757	s17643	TCGA-OV	Primary Tumor	4.80078
758	s17632	TCGA-OV	Primary Tumor	-1.21484
759	s17621	TCGA-OV	Primary Tumor	-0.310805
760	s17619	TCGA-OV	Primary Tumor	3.56824
761	s17594	TCGA-OV	Primary Tumor	2.25174
762	s17764	TCGA-OV	Primary Tumor	2.82367
763	s17793	TCGA-OV	Primary Tumor	3.35309
764	s17787	TCGA-OV	Primary Tumor	3.64547
765	s17777	TCGA-OV	Primary Tumor	2.90888
766	s17791	TCGA-OV	Primary Tumor	-1.94851
767	s17780	TCGA-OV	Primary Tumor	4.62245
768	s17762	TCGA-OV	Primary Tumor	2.90008
769	s17766	TCGA-OV	Primary Tumor	4.26574
770	s17790	TCGA-OV	Primary Tumor	2.12031
771	s17799	TCGA-OV	Primary Tumor	4.27024
772	s17792	TCGA-OV	Primary Tumor	-1.51461
773	s17779	TCGA-OV	Primary Tumor	0.82408
774	s17778	TCGA-OV	Primary Tumor	4.71956
775	s17798	TCGA-OV	Primary Tumor	1.1667
776	s17774	TCGA-OV	Primary Tumor	2.0746
777	s17763	TCGA-OV	Primary Tumor	-3.81164
778	s17781	TCGA-OV	Primary Tumor	2.00555
779	s17784	TCGA-OV	Primary Tumor	-0.0768617
780	s17783	TCGA-OV	Blood Derived Normal	1.48291
781	s17794	TCGA-OV	Primary Tumor	-1.57586
782	s17771	TCGA-OV	Primary Tumor	5.83506
783	s17788	TCGA-OV	Primary Tumor	3.3621
784	s17773	TCGA-OV	Primary Tumor	2.85884
785	s17797	TCGA-OV	Primary Tumor	1.39569
786	s17765	TCGA-OV	Primary Tumor	4.62522
787	s17775	TCGA-OV	Primary Tumor	1.80973
788	s17767	TCGA-OV	Primary Tumor	2.87062
789	s17768	TCGA-OV	Primary Tumor	2.52191
790	s17769	TCGA-OV	Primary Tumor	2.36794
791	s17795	TCGA-OV	Primary Tumor	-1.31137
792	s17776	TCGA-OV	Primary Tumor	1.13495
793	s17796	TCGA-OV	Solid Tissue Normal	2.36723
794	s17772	TCGA-OV	Primary Tumor	7.30945
795	s17760	TCGA-OV	Primary Tumor	-0.484521
796	s17786	TCGA-OV	Primary Tumor	-1.80319
797	s17761	TCGA-OV	Primary Tumor	1.28271
798	s17789	TCGA-OV	Primary Tumor	3.95431
799	s17782	TCGA-OV	Primary Tumor	0.619642
800	s17785	TCGA-OV	Primary Tumor	-2.21698
801	s18000	TCGA-OV	Primary Tumor	2.86791
802	s17982	TCGA-OV	Primary Tumor	5.17567
803	s17978	TCGA-OV	Primary Tumor	2.58515
804	s17989	TCGA-OV	Primary Tumor	2.79997
805	s18011	TCGA-OV	Primary Tumor	0.0178012
806	s17993	TCGA-OV	Primary Tumor	4.84152
807	s17985	TCGA-OV	Primary Tumor	1.6328
808	s17980	TCGA-OV	Blood Derived Normal	3.15527
809	s17987	TCGA-OV	Primary Tumor	3.32337
810	s17979	TCGA-OV	Solid Tissue Normal	2.20374
811	s17990	TCGA-OV	Primary Tumor	3.32048
812	s18012	TCGA-OV	Primary Tumor	-0.489585
813	s17996	TCGA-OV	Primary Tumor	1.80633
814	s18002	TCGA-OV	Primary Tumor	1.29079
815	s17994	TCGA-OV	Primary Tumor	4.62005
816	s17983	TCGA-OV	Primary Tumor	2.16128
817	s17998	TCGA-OV	Primary Tumor	3.07747
818	s18005	TCGA-OV	Blood Derived Normal	1.64585
819	s17984	TCGA-OV	Primary Tumor	5.35716
820	s17992	TCGA-OV	Primary Tumor	5.05364
821	s17991	TCGA-OV	Primary Tumor	1.25664
822	s17995	TCGA-OV	Primary Tumor	-2.43999
823	s18009	TCGA-OV	Primary Tumor	3.9405
824	s17981	TCGA-OV	Primary Tumor	3.92526
825	s18004	TCGA-OV	Primary Tumor	2.59396
826	s17988	TCGA-OV	Primary Tumor	0.596975
827	s18015	TCGA-OV	Solid Tissue Normal	1.27567
828	s17997	TCGA-OV	Primary Tumor	2.7164
829	s17999	TCGA-OV	Primary Tumor	0.237052
830	s18016	TCGA-OV	Primary Tumor	-1.09147
831	s18013	TCGA-OV	Primary Tumor	2.01532
832	s18006	TCGA-OV	Primary Tumor	-1.40525
833	s18008	TCGA-OV	Primary Tumor	-1.09148
834	s18010	TCGA-OV	Primary Tumor	1.28313
835	s18003	TCGA-OV	Primary Tumor	-0.306754
836	s18001	TCGA-OV	Primary Tumor	1.02061
837	s17986	TCGA-OV	Primary Tumor	3.27898
838	s18014	TCGA-OV	Primary Tumor	2.04639
839	s18078	TCGA-OV	Primary Tumor	3.727
840	s18066	TCGA-OV	Primary Tumor	3.38338
841	s18022	TCGA-OV	Primary Tumor	1.01519
842	s18054	TCGA-OV	Primary Tumor	1.58551
843	s18049	TCGA-OV	Primary Tumor	1.07489
844	s18074	TCGA-OV	Primary Tumor	5.99955
845	s18029	TCGA-OV	Primary Tumor	2.54265
846	s18037	TCGA-OV	Primary Tumor	-0.0848788
847	s18017	TCGA-OV	Blood Derived Normal	0.881231
848	s18059	TCGA-OV	Primary Tumor	1.67399
849	s18067	TCGA-OV	Primary Tumor	4.51407
850	s18025	TCGA-OV	Primary Tumor	4.01724
851	s18018	TCGA-OV	Blood Derived Normal	3.65727
852	s18019	TCGA-OV	Primary Tumor	0.17154
853	s18021	TCGA-OV	Primary Tumor	2.21706
854	s18050	TCGA-OV	Primary Tumor	0.787633
855	s18044	TCGA-OV	Primary Tumor	-0.943167
856	s18051	TCGA-OV	Primary Tumor	5.24048
857	s18040	TCGA-OV	Primary Tumor	-2.19517
858	s18077	TCGA-OV	Primary Tumor	-1.37873
859	s18062	TCGA-OV	Primary Tumor	-1.99797
860	s18057	TCGA-OV	Primary Tumor	1.81465
861	s18080	TCGA-OV	Primary Tumor	-2.35881
862	s18027	TCGA-OV	Primary Tumor	-2.47655
863	s18053	TCGA-OV	Primary Tumor	3.63246
864	s18026	TCGA-OV	Primary Tumor	4.13408
865	s18052	TCGA-OV	Primary Tumor	3.65703
866	s18030	TCGA-OV	Primary Tumor	4.6842
867	s18075	TCGA-OV	Primary Tumor	0.877926
868	s18041	TCGA-OV	Primary Tumor	5.65251
869	s18023	TCGA-OV	Primary Tumor	0.136715
870	s18031	TCGA-OV	Primary Tumor	3.79443
871	s18033	TCGA-OV	Primary Tumor	-1.60238
872	s18034	TCGA-OV	Blood Derived Normal	1.39574
873	s18070	TCGA-OV	Primary Tumor	0.441616
874	s18076	TCGA-OV	Primary Tumor	-1.54566
875	s18045	TCGA-OV	Primary Tumor	3.53693
876	s18064	TCGA-OV	Primary Tumor	3.54723
877	s18024	TCGA-OV	Primary Tumor	1.85603
878	s18073	TCGA-OV	Primary Tumor	2.94462
879	s18039	TCGA-OV	Primary Tumor	3.05661
880	s18079	TCGA-OV	Primary Tumor	6.8499
881	s18063	TCGA-OV	Primary Tumor	-1.45755
882	s18020	TCGA-OV	Blood Derived Normal	1.4806
883	s18069	TCGA-OV	Primary Tumor	-0.109714
884	s18058	TCGA-OV	Primary Tumor	-1.46478
885	s18028	TCGA-OV	Primary Tumor	3.93289
886	s18072	TCGA-OV	Primary Tumor	3.38196
887	s18068	TCGA-OV	Primary Tumor	1.18133
888	s18056	TCGA-OV	Primary Tumor	4.25182
889	s18038	TCGA-OV	Primary Tumor	-2.56388
890	s18071	TCGA-OV	Primary Tumor	-0.488669
891	s18047	TCGA-OV	Primary Tumor	1.15502
892	s18048	TCGA-OV	Primary Tumor	-1.35143
893	s18046	TCGA-OV	Primary Tumor	1.59223
894	s18043	TCGA-OV	Primary Tumor	0.165552
895	s18036	TCGA-OV	Blood Derived Normal	1.75206
896	s18060	TCGA-OV	Primary Tumor	4.51129
897	s18042	TCGA-OV	Primary Tumor	3.79013
898	s18055	TCGA-OV	Blood Derived Normal	-0.879576
899	s18032	TCGA-OV	Primary Tumor	2.72599
900	s18065	TCGA-OV	Primary Tumor	2.17771
901	s18149	TCGA-OV	Primary Tumor	4.70802
902	s18147	TCGA-OV	Blood Derived Normal	3.67828
903	s18150	TCGA-OV	Blood Derived Normal	2.49684
904	s18148	TCGA-OV	Primary Tumor	2.93435
905	s17182	TCGA-OV	Primary Tumor	4.25396
906	s17196	TCGA-OV	Primary Tumor	2.27947
907	s17197	TCGA-OV	Primary Tumor	4.17232
908	s17185	TCGA-OV	Primary Tumor	2.95931
909	s17170	TCGA-OV	Primary Tumor	1.45886
910	s17174	TCGA-OV	Primary Tumor	1.50639
911	s17183	TCGA-OV	Primary Tumor	-0.267002
912	s17176	TCGA-OV	Primary Tumor	5.40015
913	s17202	TCGA-OV	Primary Tumor	1.41376
914	s17192	TCGA-OV	Primary Tumor	4.96853
915	s17167	TCGA-OV	Primary Tumor	0.690723
916	s17189	TCGA-OV	Primary Tumor	3.98585
917	s17190	TCGA-OV	Primary Tumor	-1.30497
918	s17180	TCGA-OV	Primary Tumor	0.837141
919	s17194	TCGA-OV	Primary Tumor	3.99813
920	s17171	TCGA-OV	Primary Tumor	-2.02102
921	s17168	TCGA-OV	Primary Tumor	4.62156
922	s17165	TCGA-OV	Primary Tumor	0.914094
923	s17191	TCGA-OV	Primary Tumor	0.0153912
924	s17173	TCGA-OV	Primary Tumor	4.23646
925	s17188	TCGA-OV	Primary Tumor	-1.1893
926	s17201	TCGA-OV	Primary Tumor	2.78887
927	s17177	TCGA-OV	Primary Tumor	-2.52184
928	s17169	TCGA-OV	Primary Tumor	5.49
929	s17187	TCGA-OV	Primary Tumor	4.25117
930	s17164	TCGA-OV	Primary Tumor	2.08899
931	s17184	TCGA-OV	Primary Tumor	3.57708
932	s17186	TCGA-OV	Primary Tumor	3.6356
933	s17199	TCGA-OV	Primary Tumor	4.60383
934	s17181	TCGA-OV	Primary Tumor	4.32658
935	s17179	TCGA-OV	Primary Tumor	2.33983
936	s17198	TCGA-OV	Primary Tumor	1.25546
937	s17193	TCGA-OV	Primary Tumor	1.89412
938	s17200	TCGA-OV	Primary Tumor	1.40422
939	s17166	TCGA-OV	Blood Derived Normal	0.848878
940	s17195	TCGA-OV	Primary Tumor	3.10545
941	s17384	TCGA-OV	Primary Tumor	2.6206
942	s17357	TCGA-OV	Primary Tumor	4.9818
943	s17360	TCGA-OV	Primary Tumor	4.81083
944	s17388	TCGA-OV	Primary Tumor	5.52009
945	s17394	TCGA-OV	Primary Tumor	7.76613
946	s17376	TCGA-OV	Primary Tumor	4.5524
947	s17367	TCGA-OV	Primary Tumor	2.81516
948	s17400	TCGA-OV	Primary Tumor	-0.624227
949	s17373	TCGA-OV	Primary Tumor	1.42535
950	s17368	TCGA-OV	Primary Tumor	-3.42257
951	s17359	TCGA-OV	Primary Tumor	4.49445
952	s17397	TCGA-OV	Primary Tumor	-2.57057
953	s17358	TCGA-OV	Primary Tumor	2.6595
954	s17387	TCGA-OV	Primary Tumor	5.27213
955	s17365	TCGA-OV	Primary Tumor	2.72757
956	s17379	TCGA-OV	Primary Tumor	-2.54244
957	s17354	TCGA-OV	Primary Tumor	5.01386
958	s17386	TCGA-OV	Primary Tumor	1.9279
959	s17362	TCGA-OV	Primary Tumor	2.37536
960	s17395	TCGA-OV	Blood Derived Normal	0.186977
961	s17401	TCGA-OV	Primary Tumor	-0.744897
962	s17348	TCGA-OV	Blood Derived Normal	-0.324376
963	s17366	TCGA-OV	Primary Tumor	5.11557
964	s17377	TCGA-OV	Primary Tumor	5.04307
965	s17361	TCGA-OV	Primary Tumor	-0.320876
966	s17383	TCGA-OV	Primary Tumor	2.00995
967	s17385	TCGA-OV	Primary Tumor	3.65352
968	s17382	TCGA-OV	Primary Tumor	0.0899477
969	s17375	TCGA-OV	Primary Tumor	-1.26783
970	s17355	TCGA-OV	Primary Tumor	3.79876
971	s17390	TCGA-OV	Blood Derived Normal	2.00381
972	s17378	TCGA-OV	Primary Tumor	-0.429783
973	s17389	TCGA-OV	Primary Tumor	2.88071
974	s17371	TCGA-OV	Primary Tumor	3.2645
975	s17372	TCGA-OV	Primary Tumor	3.32407
976	s17369	TCGA-OV	Primary Tumor	2.43188
977	s17404	TCGA-OV	Primary Tumor	6.83544
978	s17350	TCGA-OV	Primary Tumor	-0.986222
979	s17352	TCGA-OV	Primary Tumor	-2.48839
980	s17364	TCGA-OV	Primary Tumor	-2.01943
981	s17403	TCGA-OV	Primary Tumor	4.25183
982	s17381	TCGA-OV	Primary Tumor	4.88774
983	s17363	TCGA-OV	Primary Tumor	4.54976
984	s17353	TCGA-OV	Primary Tumor	4.2103
985	s17402	TCGA-OV	Primary Tumor	1.1054
986	s17380	TCGA-OV	Primary Tumor	3.45454
987	s17356	TCGA-OV	Primary Tumor	-1.90907
988	s17398	TCGA-OV	Primary Tumor	4.35099
989	s17349	TCGA-OV	Blood Derived Normal	-2.81235
990	s17396	TCGA-OV	Primary Tumor	5.34023
991	s17399	TCGA-OV	Primary Tumor	2.29584
992	s17370	TCGA-OV	Primary Tumor	3.05001
993	s17374	TCGA-OV	Primary Tumor	3.78071
994	s17393	TCGA-OV	Primary Tumor	-0.258464
995	s17351	TCGA-OV	Primary Tumor	0.85004
996	s16790	TCGA-LIHC	Primary Tumor	-0.599893
997	s16818	TCGA-LIHC	Primary Tumor	0.174033
998	s16804	TCGA-LIHC	Primary Tumor	-0.211566
999	s16846	TCGA-LIHC	Primary Tumor	5.44699
1000	s16788	TCGA-LIHC	Primary Tumor	3.05642
1001	s16825	TCGA-LIHC	Primary Tumor	-0.138444
1002	s16806	TCGA-LIHC	Primary Tumor	1.8616
1003	s16773	TCGA-LIHC	Blood Derived Normal	3.18797
1004	s16785	TCGA-LIHC	Solid Tissue Normal	2.7599
1005	s16791	TCGA-LIHC	Blood Derived Normal	-1.57918
1006	s16841	TCGA-LIHC	Primary Tumor	-0.911627
1007	s16779	TCGA-LIHC	Solid Tissue Normal	1.84216
1008	s16774	TCGA-LIHC	Solid Tissue Normal	2.26891
1009	s16840	TCGA-LIHC	Primary Tumor	3.12089
1010	s16826	TCGA-LIHC	Primary Tumor	-1.32488
1011	s16811	TCGA-LIHC	Primary Tumor	-0.445866
1012	s16815	TCGA-LIHC	Primary Tumor	-1.23811
1013	s16776	TCGA-LIHC	Primary Tumor	2.64816
1014	s16795	TCGA-LIHC	Solid Tissue Normal	-1.51645
1015	s16830	TCGA-LIHC	Primary Tumor	3.31508
1016	s16798	TCGA-LIHC	Primary Tumor	1.67333
1017	s16796	TCGA-LIHC	Solid Tissue Normal	0.164559
1018	s16836	TCGA-LIHC	Primary Tumor	-0.0672275
1019	s16837	TCGA-LIHC	Primary Tumor	0.299132
1020	s16844	TCGA-LIHC	Primary Tumor	1.40841
1021	s16835	TCGA-LIHC	Primary Tumor	-0.365792
1022	s16783	TCGA-LIHC	Primary Tumor	1.15538
1023	s16821	TCGA-LIHC	Primary Tumor	6.52381
1024	s16797	TCGA-LIHC	Solid Tissue Normal	-0.814509
1025	s16778	TCGA-LIHC	Solid Tissue Normal	2.11914
1026	s16812	TCGA-LIHC	Primary Tumor	-1.40288
1027	s16813	TCGA-LIHC	Primary Tumor	3.58558
1028	s16809	TCGA-LIHC	Primary Tumor	-0.793613
1029	s16823	TCGA-LIHC	Primary Tumor	0.945889
1030	s16789	TCGA-LIHC	Primary Tumor	0.537698
1031	s16827	TCGA-LIHC	Primary Tumor	3.07753
1032	s16838	TCGA-LIHC	Primary Tumor	0.111057
1033	s16845	TCGA-LIHC	Primary Tumor	-0.445427
1034	s16822	TCGA-LIHC	Primary Tumor	-0.796223
1035	s16780	TCGA-LIHC	Solid Tissue Normal	1.06781
1036	s16805	TCGA-LIHC	Primary Tumor	2.34854
1037	s16777	TCGA-LIHC	Solid Tissue Normal	2.92566
1038	s16816	TCGA-LIHC	Primary Tumor	-2.05329
1039	s16781	TCGA-LIHC	Primary Tumor	2.27099
1040	s16800	TCGA-LIHC	Solid Tissue Normal	4.37866
1041	s16829	TCGA-LIHC	Primary Tumor	2.12509
1042	s16828	TCGA-LIHC	Primary Tumor	5.27279
1043	s16810	TCGA-LIHC	Primary Tumor	-1.1252
1044	s16786	TCGA-LIHC	Primary Tumor	1.67865
1045	s16801	TCGA-LIHC	Primary Tumor	2.98573
1046	s16843	TCGA-LIHC	Primary Tumor	0.0311225
1047	s16807	TCGA-LIHC	Primary Tumor	-1.09416
1048	s16803	TCGA-LIHC	Primary Tumor	1.6488
1049	s16819	TCGA-LIHC	Primary Tumor	1.92936
1050	s16793	TCGA-LIHC	Primary Tumor	1.89741
1051	s16794	TCGA-LIHC	Solid Tissue Normal	-0.682172
1052	s16808	TCGA-LIHC	Primary Tumor	-0.768145
1053	s16784	TCGA-LIHC	Primary Tumor	2.10132
1054	s16820	TCGA-LIHC	Primary Tumor	-0.641444
1055	s16831	TCGA-LIHC	Primary Tumor	1.36059
1056	s16799	TCGA-LIHC	Primary Tumor	3.59562
1057	s16842	TCGA-LIHC	Primary Tumor	4.08695
1058	s16782	TCGA-LIHC	Blood Derived Normal	1.30124
1059	s16839	TCGA-LIHC	Primary Tumor	1.21345
1060	s16832	TCGA-LIHC	Primary Tumor	1.12377
1061	s16833	TCGA-LIHC	Primary Tumor	-1.64886
1062	s16787	TCGA-LIHC	Primary Tumor	1.9015
1063	s16824	TCGA-LIHC	Primary Tumor	-0.952959
1064	s16814	TCGA-LIHC	Primary Tumor	2.41944
1065	s16802	TCGA-LIHC	Solid Tissue Normal	2.70324
1066	s16775	TCGA-LIHC	Solid Tissue Normal	1.10857
1067	s16792	TCGA-LIHC	Primary Tumor	2.52305
1068	s16817	TCGA-LIHC	Primary Tumor	2.80294
1069	s16772	TCGA-LIHC	Blood Derived Normal	1.94976
1070	s16933	TCGA-LIHC	Primary Tumor	0.0608379
1071	s16963	TCGA-LIHC	Primary Tumor	3.76234
1072	s16924	TCGA-LIHC	Primary Tumor	2.23479
1073	s16858	TCGA-LIHC	Blood Derived Normal	1.28057
1074	s16889	TCGA-LIHC	Primary Tumor	3.11928
1075	s16932	TCGA-LIHC	Primary Tumor	-1.16062
1076	s16860	TCGA-LIHC	Blood Derived Normal	3.14065
1077	s16923	TCGA-LIHC	Primary Tumor	-1.77689
1078	s16958	TCGA-LIHC	Primary Tumor	2.9143
1079	s16946	TCGA-LIHC	Primary Tumor	-0.552221
1080	s16894	TCGA-LIHC	Primary Tumor	5.55382
1081	s16918	TCGA-LIHC	Primary Tumor	3.95812
1082	s16929	TCGA-LIHC	Primary Tumor	-0.0777339
1083	s16969	TCGA-LIHC	Primary Tumor	-0.984183
1084	s16848	TCGA-LIHC	Primary Tumor	1.45404
1085	s16906	TCGA-LIHC	Primary Tumor	1.82428
1086	s16899	TCGA-LIHC	Primary Tumor	-0.831899
1087	s16877	TCGA-LIHC	Solid Tissue Normal	2.66228
1088	s16902	TCGA-LIHC	Primary Tumor	1.81048
1089	s16870	TCGA-LIHC	Primary Tumor	2.65803
1090	s16920	TCGA-LIHC	Primary Tumor	-0.874149
1091	s16966	TCGA-LIHC	Primary Tumor	-1.05419
1092	s16917	TCGA-LIHC	Primary Tumor	2.9166
1093	s16919	TCGA-LIHC	Primary Tumor	6.03079
1094	s16930	TCGA-LIHC	Primary Tumor	-1.54177
1095	s16941	TCGA-LIHC	Primary Tumor	-0.85207
1096	s16849	TCGA-LIHC	Blood Derived Normal	2.53513
1097	s16868	TCGA-LIHC	Primary Tumor	2.67551
1098	s16862	TCGA-LIHC	Solid Tissue Normal	-1.51724
1099	s16879	TCGA-LIHC	Primary Tumor	4.38232
1100	s16900	TCGA-LIHC	Primary Tumor	0.297624
1101	s16953	TCGA-LIHC	Primary Tumor	3.4163
1102	s16910	TCGA-LIHC	Primary Tumor	3.82831
1103	s16943	TCGA-LIHC	Primary Tumor	-1.75415
1104	s16922	TCGA-LIHC	Primary Tumor	1.15273
1105	s16874	TCGA-LIHC	Primary Tumor	-0.980118
1106	s16850	TCGA-LIHC	Primary Tumor	1.57493
1107	s16925	TCGA-LIHC	Primary Tumor	4.00256
1108	s16961	TCGA-LIHC	Primary Tumor	-0.452131
1109	s16876	TCGA-LIHC	Primary Tumor	2.30982
1110	s16875	TCGA-LIHC	Solid Tissue Normal	3.1051
1111	s16904	TCGA-LIHC	Solid Tissue Normal	3.71827
1112	s16869	TCGA-LIHC	Primary Tumor	2.15511
1113	s16856	TCGA-LIHC	Primary Tumor	1.40815
1114	s16926	TCGA-LIHC	Primary Tumor	4.05404
1115	s16881	TCGA-LIHC	Primary Tumor	-1.78622
1116	s16954	TCGA-LIHC	Primary Tumor	-0.524752
1117	s16891	TCGA-LIHC	Primary Tumor	0.612052
1118	s16967	TCGA-LIHC	Primary Tumor	3.31726
1119	s16857	TCGA-LIHC	Primary Tumor	2.62143
1120	s16892	TCGA-LIHC	Primary Tumor	1.48723
1121	s16915	TCGA-LIHC	Primary Tumor	3.86223
1122	s16942	TCGA-LIHC	Primary Tumor	1.28936
1123	s16937	TCGA-LIHC	Primary Tumor	1.5295
1124	s16935	TCGA-LIHC	Primary Tumor	2.43161
1125	s16903	TCGA-LIHC	Primary Tumor	4.62245
1126	s16962	TCGA-LIHC	Primary Tumor	5.56622
1127	s16847	TCGA-LIHC	Blood Derived Normal	-1.34051
1128	s16880	TCGA-LIHC	Primary Tumor	1.84238
1129	s16912	TCGA-LIHC	Primary Tumor	1.96917
1130	s16893	TCGA-LIHC	Primary Tumor	3.42259
1131	s16944	TCGA-LIHC	Primary Tumor	3.44259
1132	s16863	TCGA-LIHC	Blood Derived Normal	2.97564
1133	s16940	TCGA-LIHC	Primary Tumor	1.90668
1134	s16964	TCGA-LIHC	Primary Tumor	4.59594
1135	s16901	TCGA-LIHC	Primary Tumor	3.57812
1136	s16965	TCGA-LIHC	Primary Tumor	4.61106
1137	s16897	TCGA-LIHC	Primary Tumor	2.41955
1138	s16855	TCGA-LIHC	Primary Tumor	2.91176
1139	s16871	TCGA-LIHC	Primary Tumor	1.63831
1140	s16872	TCGA-LIHC	Primary Tumor	3.50775
1141	s16951	TCGA-LIHC	Primary Tumor	0.607354
1142	s16852	TCGA-LIHC	Primary Tumor	1.49357
1143	s16865	TCGA-LIHC	Primary Tumor	1.82058
1144	s16886	TCGA-LIHC	Solid Tissue Normal	-2.22551
1145	s16948	TCGA-LIHC	Primary Tumor	2.23957
1146	s16907	TCGA-LIHC	Primary Tumor	5.14998
1147	s16959	TCGA-LIHC	Primary Tumor	-0.604095
1148	s16960	TCGA-LIHC	Primary Tumor	-0.523778
1149	s16864	TCGA-LIHC	Primary Tumor	2.54441
1150	s16945	TCGA-LIHC	Primary Tumor	-0.273072
1151	s16861	TCGA-LIHC	Primary Tumor	1.31547
1152	s16887	TCGA-LIHC	Primary Tumor	3.72337
1153	s16949	TCGA-LIHC	Primary Tumor	0.00919513
1154	s16908	TCGA-LIHC	Primary Tumor	-0.752282
1155	s16905	TCGA-LIHC	Solid Tissue Normal	4.01005
1156	s16890	TCGA-LIHC	Solid Tissue Normal	3.10776
1157	s16867	TCGA-LIHC	Solid Tissue Normal	4.47056
1158	s16928	TCGA-LIHC	Primary Tumor	3.70431
1159	s16888	TCGA-LIHC	Primary Tumor	-1.26355
1160	s16898	TCGA-LIHC	Primary Tumor	3.85727
1161	s16916	TCGA-LIHC	Primary Tumor	-0.168767
1162	s16884	TCGA-LIHC	Primary Tumor	0.98942
1163	s16896	TCGA-LIHC	Solid Tissue Normal	2.82341
1164	s16956	TCGA-LIHC	Primary Tumor	-0.406612
1165	s16853	TCGA-LIHC	Blood Derived Normal	2.07936
1166	s16950	TCGA-LIHC	Primary Tumor	3.08716
1167	s16909	TCGA-LIHC	Primary Tumor	-1.34587
1168	s16927	TCGA-LIHC	Primary Tumor	-0.77194
1169	s16885	TCGA-LIHC	Primary Tumor	3.54724
1170	s16914	TCGA-LIHC	Primary Tumor	1.43473
1171	s16859	TCGA-LIHC	Solid Tissue Normal	-0.409759
1172	s16873	TCGA-LIHC	Primary Tumor	2.68369
1173	s16952	TCGA-LIHC	Primary Tumor	-0.775431
1174	s16866	TCGA-LIHC	Solid Tissue Normal	2.32917
1175	s16936	TCGA-LIHC	Primary Tumor	-3.48691
1176	s16913	TCGA-LIHC	Primary Tumor	2.73021
1177	s16939	TCGA-LIHC	Primary Tumor	1.38971
1178	s16911	TCGA-LIHC	Primary Tumor	4.07267
1179	s16854	TCGA-LIHC	Primary Tumor	2.14951
1180	s16968	TCGA-LIHC	Primary Tumor	3.19399
1181	s16883	TCGA-LIHC	Solid Tissue Normal	2.31854
1182	s16931	TCGA-LIHC	Primary Tumor	0.754941
1183	s16878	TCGA-LIHC	Solid Tissue Normal	-1.98537
1184	s16882	TCGA-LIHC	Primary Tumor	1.70091
1185	s16851	TCGA-LIHC	Primary Tumor	1.93593
1186	s16947	TCGA-LIHC	Primary Tumor	-0.108581
1187	s16895	TCGA-LIHC	Primary Tumor	-1.28416
1188	s16655	TCGA-LIHC	Primary Tumor	3.62442
1189	s16636	TCGA-LIHC	Primary Tumor	2.98216
1190	s16584	TCGA-LIHC	Solid Tissue Normal	1.86719
1191	s16635	TCGA-LIHC	Primary Tumor	2.90417
1192	s16657	TCGA-LIHC	Primary Tumor	-0.497902
1193	s16622	TCGA-LIHC	Primary Tumor	3.91208
1194	s16644	TCGA-LIHC	Primary Tumor	0.815859
1195	s16593	TCGA-LIHC	Primary Tumor	2.88365
1196	s16625	TCGA-LIHC	Primary Tumor	2.07416
1197	s16606	TCGA-LIHC	Primary Tumor	-0.782379
1198	s16640	TCGA-LIHC	Primary Tumor	-0.299309
1199	s16628	TCGA-LIHC	Primary Tumor	0.96024
1200	s16633	TCGA-LIHC	Primary Tumor	-0.564309
1201	s16596	TCGA-LIHC	Solid Tissue Normal	3.80226
1202	s16602	TCGA-LIHC	Primary Tumor	4.45552
1203	s16592	TCGA-LIHC	Primary Tumor	2.368
1204	s16634	TCGA-LIHC	Primary Tumor	2.7844
1205	s16667	TCGA-LIHC	Primary Tumor	0.379125
1206	s16654	TCGA-LIHC	Primary Tumor	2.35151
1207	s16639	TCGA-LIHC	Primary Tumor	1.87306
1208	s16641	TCGA-LIHC	Primary Tumor	3.6481
1209	s16601	TCGA-LIHC	Primary Tumor	0.818661
1210	s16630	TCGA-LIHC	Primary Tumor	-0.476347
1211	s16669	TCGA-LIHC	Primary Tumor	-0.113791
1212	s16580	TCGA-LIHC	Primary Tumor	2.41393
1213	s16666	TCGA-LIHC	Primary Tumor	-0.631793
1214	s16645	TCGA-LIHC	Primary Tumor	3.89333
1215	s16620	TCGA-LIHC	Primary Tumor	1.79866
1216	s16618	TCGA-LIHC	Primary Tumor	-1.75869
1217	s16586	TCGA-LIHC	Primary Tumor	2.23523
1218	s16587	TCGA-LIHC	Primary Tumor	1.17404
1219	s16608	TCGA-LIHC	Primary Tumor	-1.95836
1220	s16627	TCGA-LIHC	Primary Tumor	1.95074
1221	s16595	TCGA-LIHC	Blood Derived Normal	1.72635
1222	s16638	TCGA-LIHC	Primary Tumor	1.8963
1223	s16632	TCGA-LIHC	Primary Tumor	1.26835
1224	s16664	TCGA-LIHC	Primary Tumor	1.66503
1225	s16653	TCGA-LIHC	Primary Tumor	-2.74691
1226	s16591	TCGA-LIHC	Primary Tumor	2.55669
1227	s16615	TCGA-LIHC	Solid Tissue Normal	-0.869194
1228	s16623	TCGA-LIHC	Solid Tissue Normal	4.83323
1229	s16612	TCGA-LIHC	Solid Tissue Normal	-1.03524
1230	s16585	TCGA-LIHC	Primary Tumor	1.10151
1231	s16611	TCGA-LIHC	Primary Tumor	6.97168
1232	s16647	TCGA-LIHC	Primary Tumor	4.21286
1233	s16651	TCGA-LIHC	Primary Tumor	1.68793
1234	s16590	TCGA-LIHC	Blood Derived Normal	2.87726
1235	s16650	TCGA-LIHC	Primary Tumor	2.34892
1236	s16619	TCGA-LIHC	Solid Tissue Normal	1.38807
1237	s16642	TCGA-LIHC	Primary Tumor	0.614757
1238	s16600	TCGA-LIHC	Primary Tumor	2.18605
1239	s16665	TCGA-LIHC	Primary Tumor	2.50776
1240	s16610	TCGA-LIHC	Primary Tumor	2.86914
1241	s16629	TCGA-LIHC	Primary Tumor	2.68151
1242	s16663	TCGA-LIHC	Primary Tumor	-0.934401
1243	s16617	TCGA-LIHC	Primary Tumor	2.73497
1244	s16659	TCGA-LIHC	Primary Tumor	1.45658
1245	s16597	TCGA-LIHC	Blood Derived Normal	2.71435
1246	s16649	TCGA-LIHC	Primary Tumor	-0.516724
1247	s16599	TCGA-LIHC	Solid Tissue Normal	4.21959
1248	s16631	TCGA-LIHC	Primary Tumor	-0.699003
1249	s16607	TCGA-LIHC	Primary Tumor	3.00983
1250	s16660	TCGA-LIHC	Primary Tumor	-1.14672
1251	s16668	TCGA-LIHC	Primary Tumor	3.39088
1252	s16616	TCGA-LIHC	Solid Tissue Normal	2.3632
1253	s16609	TCGA-LIHC	Primary Tumor	3.3478
1254	s16583	TCGA-LIHC	Blood Derived Normal	1.24021
1255	s16621	TCGA-LIHC	Solid Tissue Normal	1.46086
1256	s16605	TCGA-LIHC	Primary Tumor	-0.23247
1257	s16582	TCGA-LIHC	Primary Tumor	2.54937
1258	s16658	TCGA-LIHC	Primary Tumor	-0.17383
1259	s16589	TCGA-LIHC	Primary Tumor	1.35195
1260	s16662	TCGA-LIHC	Primary Tumor	3.81054
1261	s16614	TCGA-LIHC	Solid Tissue Normal	2.85777
1262	s16598	TCGA-LIHC	Blood Derived Normal	-2.15364
1263	s16643	TCGA-LIHC	Primary Tumor	3.56102
1264	s16588	TCGA-LIHC	Primary Tumor	1.43483
1265	s16637	TCGA-LIHC	Primary Tumor	2.76925
1266	s16594	TCGA-LIHC	Blood Derived Normal	1.9329
1267	s16613	TCGA-LIHC	Primary Tumor	2.02814
1268	s16652	TCGA-LIHC	Primary Tumor	0.336291
1269	s16581	TCGA-LIHC	Primary Tumor	2.00488
1270	s16661	TCGA-LIHC	Primary Tumor	-1.53041
1271	s16603	TCGA-LIHC	Solid Tissue Normal	-1.34605
1272	s16648	TCGA-LIHC	Primary Tumor	3.28422
1273	s16624	TCGA-LIHC	Primary Tumor	1.43002
1274	s16626	TCGA-LIHC	Primary Tumor	1.64676
1275	s16604	TCGA-LIHC	Primary Tumor	3.92007
1276	s16656	TCGA-LIHC	Primary Tumor	-0.0215045
1277	s16771	TCGA-LIHC	Primary Tumor	-1.45725
1278	s16700	TCGA-LIHC	Primary Tumor	-0.754534
1279	s16687	TCGA-LIHC	Blood Derived Normal	1.80127
1280	s16704	TCGA-LIHC	Solid Tissue Normal	4.48065
1281	s16753	TCGA-LIHC	Primary Tumor	3.20223
1282	s16763	TCGA-LIHC	Primary Tumor	4.13816
1283	s16766	TCGA-LIHC	Primary Tumor	-0.310089
1284	s16702	TCGA-LIHC	Solid Tissue Normal	1.52712
1285	s16672	TCGA-LIHC	Primary Tumor	2.62295
1286	s16729	TCGA-LIHC	Primary Tumor	2.68257
1287	s16767	TCGA-LIHC	Primary Tumor	-0.344554
1288	s16743	TCGA-LIHC	Primary Tumor	3.3214
1289	s16705	TCGA-LIHC	Primary Tumor	3.89966
1290	s16693	TCGA-LIHC	Primary Tumor	3.78638
1291	s16681	TCGA-LIHC	Blood Derived Normal	1.56523
1292	s16757	TCGA-LIHC	Primary Tumor	0.223361
1293	s16726	TCGA-LIHC	Primary Tumor	1.85801
1294	s16751	TCGA-LIHC	Primary Tumor	5.56688
1295	s16711	TCGA-LIHC	Solid Tissue Normal	2.5271
1296	s16674	TCGA-LIHC	Solid Tissue Normal	2.49078
1297	s16734	TCGA-LIHC	Primary Tumor	3.5381
1298	s16765	TCGA-LIHC	Primary Tumor	-0.465795
1299	s16699	TCGA-LIHC	Primary Tumor	2.19584
1300	s16761	TCGA-LIHC	Primary Tumor	2.03681
1301	s16739	TCGA-LIHC	Primary Tumor	0.125681
1302	s16762	TCGA-LIHC	Primary Tumor	-0.812723
1303	s16703	TCGA-LIHC	Primary Tumor	0.318615
1304	s16724	TCGA-LIHC	Primary Tumor	1.47452
1305	s16732	TCGA-LIHC	Primary Tumor	2.06851
1306	s16675	TCGA-LIHC	Primary Tumor	2.89857
1307	s16748	TCGA-LIHC	Primary Tumor	-0.544266
1308	s16738	TCGA-LIHC	Primary Tumor	2.98458
1309	s16717	TCGA-LIHC	Primary Tumor	3.08327
1310	s16727	TCGA-LIHC	Primary Tumor	-0.7378
1311	s16770	TCGA-LIHC	Primary Tumor	-0.384233
1312	s16737	TCGA-LIHC	Primary Tumor	0.639217
1313	s16696	TCGA-LIHC	Solid Tissue Normal	1.59612
1314	s16756	TCGA-LIHC	Primary Tumor	3.8212
1315	s16746	TCGA-LIHC	Primary Tumor	-1.05655
1316	s16712	TCGA-LIHC	Solid Tissue Normal	3.67974
1317	s16670	TCGA-LIHC	Primary Tumor	2.04944
1318	s16714	TCGA-LIHC	Primary Tumor	3.61108
1319	s16733	TCGA-LIHC	Primary Tumor	-0.272464
1320	s16676	TCGA-LIHC	Primary Tumor	2.68227
1321	s16760	TCGA-LIHC	Primary Tumor	1.95133
1322	s16677	TCGA-LIHC	Blood Derived Normal	2.11314
1323	s16716	TCGA-LIHC	Solid Tissue Normal	4.03187
1324	s16745	TCGA-LIHC	Primary Tumor	-0.823503
1325	s16685	TCGA-LIHC	Primary Tumor	1.71062
1326	s16749	TCGA-LIHC	Primary Tumor	1.48855
1327	s16683	TCGA-LIHC	Blood Derived Normal	2.28514
1328	s16758	TCGA-LIHC	Primary Tumor	0.010358
1329	s16754	TCGA-LIHC	Primary Tumor	1.77305
1330	s16688	TCGA-LIHC	Primary Tumor	2.63684
1331	s16671	TCGA-LIHC	Blood Derived Normal	2.94473
1332	s16718	TCGA-LIHC	Solid Tissue Normal	2.53915
1333	s16698	TCGA-LIHC	Solid Tissue Normal	4.57514
1334	s16694	TCGA-LIHC	Solid Tissue Normal	3.27891
1335	s16713	TCGA-LIHC	Primary Tumor	3.70652
1336	s16701	TCGA-LIHC	Primary Tumor	2.31908
1337	s16755	TCGA-LIHC	Primary Tumor	3.08016
1338	s16750	TCGA-LIHC	Primary Tumor	1.456
1339	s16686	TCGA-LIHC	Primary Tumor	3.78412
1340	s16723	TCGA-LIHC	Primary Tumor	2.37099
1341	s16720	TCGA-LIHC	Solid Tissue Normal	1.89021
1342	s16769	TCGA-LIHC	Primary Tumor	-0.539683
1343	s16679	TCGA-LIHC	Solid Tissue Normal	2.41744
1344	s16689	TCGA-LIHC	Blood Derived Normal	3.61924
1345	s16697	TCGA-LIHC	Solid Tissue Normal	3.14034
1346	s16742	TCGA-LIHC	Primary Tumor	-1.80952
1347	s16678	TCGA-LIHC	Solid Tissue Normal	1.13618
1348	s16690	TCGA-LIHC	Primary Tumor	3.13371
1349	s16709	TCGA-LIHC	Primary Tumor	-0.512396
1350	s16735	TCGA-LIHC	Primary Tumor	-0.602568
1351	s16740	TCGA-LIHC	Primary Tumor	3.21196
1352	s16719	TCGA-LIHC	Primary Tumor	-0.711808
1353	s16684	TCGA-LIHC	Blood Derived Normal	2.96435
1354	s16715	TCGA-LIHC	Primary Tumor	-2.51391
1355	s16706	TCGA-LIHC	Primary Tumor	3.81518
1356	s16710	TCGA-LIHC	Primary Tumor	4.78799
1357	s16768	TCGA-LIHC	Primary Tumor	-0.84334
1358	s16752	TCGA-LIHC	Primary Tumor	1.05883
1359	s16725	TCGA-LIHC	Primary Tumor	3.75489
1360	s16691	TCGA-LIHC	Primary Tumor	-1.18058
1361	s16764	TCGA-LIHC	Primary Tumor	-0.728906
1362	s16722	TCGA-LIHC	Primary Tumor	1.86152
1363	s16728	TCGA-LIHC	Primary Tumor	1.80651
1364	s16695	TCGA-LIHC	Primary Tumor	2.22194
1365	s16736	TCGA-LIHC	Primary Tumor	-0.970208
1366	s16682	TCGA-LIHC	Primary Tumor	1.39086
1367	s16673	TCGA-LIHC	Solid Tissue Normal	2.92456
1368	s16721	TCGA-LIHC	Primary Tumor	2.50583
1369	s16680	TCGA-LIHC	Solid Tissue Normal	2.95669
1370	s16692	TCGA-LIHC	Primary Tumor	-0.639419
1371	s16708	TCGA-LIHC	Primary Tumor	0.302076
1372	s16744	TCGA-LIHC	Primary Tumor	2.38557
1373	s16759	TCGA-LIHC	Primary Tumor	-0.0361913
1374	s16741	TCGA-LIHC	Primary Tumor	-1.58865
1375	s16707	TCGA-LIHC	Primary Tumor	-0.963781
1376	s16971	TCGA-LIHC	Blood Derived Normal	1.27555
1377	s17012	TCGA-LIHC	Primary Tumor	1.38169
1378	s17035	TCGA-LIHC	Primary Tumor	4.99215
1379	s17041	TCGA-LIHC	Primary Tumor	4.84608
1380	s16977	TCGA-LIHC	Primary Tumor	1.72239
1381	s17006	TCGA-LIHC	Solid Tissue Normal	3.14774
1382	s17033	TCGA-LIHC	Primary Tumor	-7.17522
1383	s17004	TCGA-LIHC	Solid Tissue Normal	3.42483
1384	s16982	TCGA-LIHC	Primary Tumor	3.33367
1385	s17001	TCGA-LIHC	Primary Tumor	-0.41908
1386	s16985	TCGA-LIHC	Solid Tissue Normal	-2.46173
1387	s16999	TCGA-LIHC	Primary Tumor	3.38368
1388	s17000	TCGA-LIHC	Primary Tumor	-0.982076
1389	s17019	TCGA-LIHC	Primary Tumor	-0.385129
1390	s17011	TCGA-LIHC	Primary Tumor	-0.880379
1391	s17005	TCGA-LIHC	Primary Tumor	1.14962
1392	s17029	TCGA-LIHC	Primary Tumor	4.30203
1393	s16984	TCGA-LIHC	Primary Tumor	1.07427
1394	s17025	TCGA-LIHC	Primary Tumor	4.91486
1395	s16988	TCGA-LIHC	Primary Tumor	2.25552
1396	s17047	TCGA-LIHC	Primary Tumor	4.00919
1397	s16970	TCGA-LIHC	Solid Tissue Normal	1.51908
1398	s16997	TCGA-LIHC	Primary Tumor	-1.00699
1399	s17034	TCGA-LIHC	Primary Tumor	2.87197
1400	s16989	TCGA-LIHC	Primary Tumor	-1.72543
1401	s16979	TCGA-LIHC	Solid Tissue Normal	1.09367
1402	s17018	TCGA-LIHC	Solid Tissue Normal	2.33999
1403	s17050	TCGA-LIHC	Primary Tumor	2.72681
1404	s17055	TCGA-LIHC	Primary Tumor	2.24545
1405	s17010	TCGA-LIHC	Primary Tumor	2.49324
1406	s17020	TCGA-LIHC	Primary Tumor	-2.00937
1407	s17046	TCGA-LIHC	Primary Tumor	2.12441
1408	s16981	TCGA-LIHC	Blood Derived Normal	0.665749
1409	s16980	TCGA-LIHC	Primary Tumor	2.04421
1410	s17049	TCGA-LIHC	Primary Tumor	-0.51106
1411	s16975	TCGA-LIHC	Primary Tumor	2.79097
1412	s16992	TCGA-LIHC	Primary Tumor	0.808558
1413	s17051	TCGA-LIHC	Primary Tumor	-0.815795
1414	s16983	TCGA-LIHC	Primary Tumor	2.72278
1415	s17030	TCGA-LIHC	Primary Tumor	1.35976
1416	s17028	TCGA-LIHC	Primary Tumor	-7.52398
1417	s16993	TCGA-LIHC	Primary Tumor	0.48808
1418	s16990	TCGA-LIHC	Primary Tumor	5.80971
1419	s16996	TCGA-LIHC	Solid Tissue Normal	3.97603
1420	s17052	TCGA-LIHC	Primary Tumor	2.25505
1421	s16998	TCGA-LIHC	Primary Tumor	2.58158
1422	s17027	TCGA-LIHC	Primary Tumor	2.14287
1423	s17013	TCGA-LIHC	Primary Tumor	-1.30392
1424	s16976	TCGA-LIHC	Primary Tumor	1.47021
1425	s17048	TCGA-LIHC	Primary Tumor	-0.673395
1426	s17053	TCGA-LIHC	Primary Tumor	2.50307
1427	s17008	TCGA-LIHC	Solid Tissue Normal	5.617
1428	s16973	TCGA-LIHC	Blood Derived Normal	2.07829
1429	s17003	TCGA-LIHC	Primary Tumor	3.40687
1430	s17038	TCGA-LIHC	Primary Tumor	2.16011
1431	s16994	TCGA-LIHC	Primary Tumor	-1.86039
1432	s17054	TCGA-LIHC	Primary Tumor	3.00293
1433	s17032	TCGA-LIHC	Primary Tumor	1.51809
1434	s17009	TCGA-LIHC	Primary Tumor	2.71473
1435	s17014	TCGA-LIHC	Primary Tumor	2.28696
1436	s17045	TCGA-LIHC	Primary Tumor	-0.0409893
1437	s17036	TCGA-LIHC	Primary Tumor	-0.2373
1438	s17026	TCGA-LIHC	Primary Tumor	1.22001
1439	s17031	TCGA-LIHC	Primary Tumor	-1.10036
1440	s17015	TCGA-LIHC	Primary Tumor	-1.91906
1441	s17024	TCGA-LIHC	Primary Tumor	-1.77292
1442	s17042	TCGA-LIHC	Primary Tumor	2.00194
1443	s17023	TCGA-LIHC	Primary Tumor	2.64697
1444	s17017	TCGA-LIHC	Primary Tumor	2.61401
1445	s16986	TCGA-LIHC	Primary Tumor	1.07552
1446	s16995	TCGA-LIHC	Primary Tumor	2.89491
1447	s17022	TCGA-LIHC	Primary Tumor	6.47168
1448	s17002	TCGA-LIHC	Solid Tissue Normal	2.57647
1449	s17016	TCGA-LIHC	Primary Tumor	2.56181
1450	s17040	TCGA-LIHC	Primary Tumor	3.11827
1451	s17037	TCGA-LIHC	Primary Tumor	1.1238
1452	s16974	TCGA-LIHC	Blood Derived Normal	2.66915
1453	s17007	TCGA-LIHC	Primary Tumor	4.38964
1454	s16987	TCGA-LIHC	Blood Derived Normal	2.38653
1455	s17044	TCGA-LIHC	Primary Tumor	-0.325955
1456	s16991	TCGA-LIHC	Solid Tissue Normal	4.22766
1457	s16972	TCGA-LIHC	Primary Tumor	1.93636
1458	s17043	TCGA-LIHC	Primary Tumor	2.22109
1459	s17021	TCGA-LIHC	Primary Tumor	3.84982
1460	s16978	TCGA-LIHC	Primary Tumor	3.2195
1461	s17111	TCGA-LIHC	Primary Tumor	-1.18192
1462	s17091	TCGA-LIHC	Primary Tumor	2.70811
1463	s17095	TCGA-LIHC	Primary Tumor	-4.02427
1464	s17076	TCGA-LIHC	Primary Tumor	2.80407
1465	s17075	TCGA-LIHC	Primary Tumor	-0.902864
1466	s17106	TCGA-LIHC	Primary Tumor	-0.522247
1467	s17081	TCGA-LIHC	Primary Tumor	2.52953
1468	s17085	TCGA-LIHC	Primary Tumor	1.3608
1469	s17093	TCGA-LIHC	Primary Tumor	1.13986
1470	s17058	TCGA-LIHC	Solid Tissue Normal	3.54655
1471	s17096	TCGA-LIHC	Primary Tumor	-2.75665
1472	s17080	TCGA-LIHC	Primary Tumor	2.91566
1473	s17104	TCGA-LIHC	Primary Tumor	1.91072
1474	s17064	TCGA-LIHC	Primary Tumor	2.74653
1475	s17071	TCGA-LIHC	Solid Tissue Normal	0.19528
1476	s17062	TCGA-LIHC	Solid Tissue Normal	2.31294
1477	s17074	TCGA-LIHC	Primary Tumor	-0.917884
1478	s17102	TCGA-LIHC	Primary Tumor	4.4689
1479	s17068	TCGA-LIHC	Primary Tumor	-0.395966
1480	s17101	TCGA-LIHC	Primary Tumor	-3.92148
1481	s17097	TCGA-LIHC	Primary Tumor	1.16049
1482	s17086	TCGA-LIHC	Primary Tumor	1.95221
1483	s17066	TCGA-LIHC	Primary Tumor	1.03752
1484	s17100	TCGA-LIHC	Primary Tumor	1.13585
1485	s17099	TCGA-LIHC	Primary Tumor	1.90204
1486	s17082	TCGA-LIHC	Primary Tumor	1.9125
1487	s17060	TCGA-LIHC	Blood Derived Normal	3.32632
1488	s17079	TCGA-LIHC	Primary Tumor	1.53638
1489	s17072	TCGA-LIHC	Solid Tissue Normal	2.3931
1490	s17088	TCGA-LIHC	Primary Tumor	-1.41009
1491	s17070	TCGA-LIHC	Primary Tumor	-0.110918
1492	s17098	TCGA-LIHC	Primary Tumor	3.13604
1493	s17067	TCGA-LIHC	Solid Tissue Normal	4.08757
1494	s17090	TCGA-LIHC	Primary Tumor	1.93047
1495	s17103	TCGA-LIHC	Primary Tumor	-1.02437
1496	s17108	TCGA-LIHC	Primary Tumor	-0.399148
1497	s17078	TCGA-LIHC	Primary Tumor	1.4121
1498	s17105	TCGA-LIHC	Primary Tumor	-0.337411
1499	s17092	TCGA-LIHC	Primary Tumor	-0.848251
1500	s17069	TCGA-LIHC	Solid Tissue Normal	4.47043
1501	s17094	TCGA-LIHC	Primary Tumor	-7.27934
1502	s17073	TCGA-LIHC	Solid Tissue Normal	-0.435184
1503	s17109	TCGA-LIHC	Primary Tumor	-0.308663
1504	s17110	TCGA-LIHC	Primary Tumor	-0.314687
1505	s17084	TCGA-LIHC	Primary Tumor	4.7999
1506	s17065	TCGA-LIHC	Blood Derived Normal	0.333747
1507	s17089	TCGA-LIHC	Primary Tumor	1.86962
1508	s17107	TCGA-LIHC	Primary Tumor	-0.519936
1509	s17056	TCGA-LIHC	Solid Tissue Normal	2.59263
1510	s17061	TCGA-LIHC	Blood Derived Normal	2.51188
1511	s17059	TCGA-LIHC	Primary Tumor	3.16648
1512	s17077	TCGA-LIHC	Solid Tissue Normal	2.9665
1513	s17057	TCGA-LIHC	Primary Tumor	1.58837
1514	s17083	TCGA-LIHC	Primary Tumor	3.18554
1515	s17063	TCGA-LIHC	Blood Derived Normal	2.11118
1516	s15697	TCGA-HNSC Positive	Primary Tumor	13.5989
1517	s15624	TCGA-HNSC Negative	Blood Derived Normal	4.83589
1518	s15741	TCGA-HNSC Negative	Primary Tumor	-1.65515
1519	s15623	TCGA-HNSC Negative	Blood Derived Normal	-0.319379
1520	s15629	TCGA-HNSC Negative	Primary Tumor	0.756641
1521	s15725	TCGA-HNSC Negative	Solid Tissue Normal	4.09178
1522	s15712	TCGA-HNSC Negative	Primary Tumor	2.9641
1523	s15731	TCGA-HNSC Positive	Primary Tumor	5.69433
1524	s15678	TCGA-HNSC Negative	Primary Tumor	3.39353
1525	s15677	TCGA-HNSC Negative	Primary Tumor	-1.14462
1526	s15604	TCGA-HNSC Negative	Primary Tumor	1.67772
1527	s15679	TCGA-HNSC Positive	Primary Tumor	3.41865
1528	s15664	TCGA-HNSC Positive	Primary Tumor	5.5279
1529	s15613	TCGA-HNSC Positive	Blood Derived Normal	3.30973
1530	s15676	TCGA-HNSC Negative	Primary Tumor	3.09374
1531	s15682	TCGA-HNSC Negative	Primary Tumor	4.56744
1532	s15642	TCGA-HNSC Negative	Solid Tissue Normal	-0.0787754
1533	s15724	TCGA-HNSC Negative	Primary Tumor	2.69118
1534	s15655	TCGA-HNSC Negative	Primary Tumor	0.595434
1535	s15609	TCGA-HNSC Negative	Primary Tumor	0.337118
1536	s15693	TCGA-HNSC Negative	Primary Tumor	0.463931
1537	s15680	TCGA-HNSC Positive	Primary Tumor	5.95327
1538	s15730	TCGA-HNSC Negative	Primary Tumor	-1.13679
1539	s15611	TCGA-HNSC Negative	Blood Derived Normal	2.63792
1540	s15652	TCGA-HNSC Negative	Primary Tumor	-0.290234
1541	s15632	TCGA-HNSC Negative	Primary Tumor	-0.138309
1542	s15729	TCGA-HNSC Negative	Primary Tumor	2.24889
1543	s15648	TCGA-HNSC Negative	Primary Tumor	1.07604
1544	s15665	TCGA-HNSC Negative	Primary Tumor	3.47251
1545	s15615	TCGA-HNSC Negative	Primary Tumor	-0.111672
1546	s15736	TCGA-HNSC Negative	Primary Tumor	1.20091
1547	s15616	TCGA-HNSC Negative	Primary Tumor	-0.599395
1548	s15626	TCGA-HNSC Positive	Blood Derived Normal	0.509422
1549	s15640	TCGA-HNSC Negative	Primary Tumor	0.368418
1550	s15713	TCGA-HNSC Negative	Primary Tumor	-0.478591
1551	s15603	TCGA-HNSC Positive	Primary Tumor	6.35242
1552	s15737	TCGA-HNSC Negative	Primary Tumor	2.66785
1553	s15622	TCGA-HNSC Negative	Blood Derived Normal	2.94414
1554	s15708	TCGA-HNSC Negative	Primary Tumor	3.68417
1555	s15705	TCGA-HNSC Negative	Primary Tumor	3.35239
1556	s15621	TCGA-HNSC Negative	Blood Derived Normal	2.83854
1557	s15732	TCGA-HNSC Negative	Primary Tumor	0.52769
1558	s15639	TCGA-HNSC Positive	Blood Derived Normal	-6.46833
1559	s15644	TCGA-HNSC Negative	Blood Derived Normal	-0.816201
1560	s15637	TCGA-HNSC Negative	Primary Tumor	1.56836
1561	s15733	TCGA-HNSC Positive	Primary Tumor	12.6279
1562	s15688	TCGA-HNSC Negative	Primary Tumor	-1.39463
1563	s15706	TCGA-HNSC Negative	Primary Tumor	1.39292
1564	s15643	TCGA-HNSC Negative	Solid Tissue Normal	1.78274
1565	s15650	TCGA-HNSC Negative	Primary Tumor	2.78242
1566	s15681	TCGA-HNSC Negative	Primary Tumor	0.0764549
1567	s15704	TCGA-HNSC Negative	Primary Tumor	5.82765
1568	s15735	TCGA-HNSC Negative	Primary Tumor	5.25615
1569	s15635	TCGA-HNSC Negative	Blood Derived Normal	-2.60672
1570	s15653	TCGA-HNSC Negative	Blood Derived Normal	3.66024
1571	s15657	TCGA-HNSC Negative	Blood Derived Normal	2.36101
1572	s15602	TCGA-HNSC Negative	Primary Tumor	13.2561
1573	s15620	TCGA-HNSC Negative	Primary Tumor	0.770285
1574	s15656	TCGA-HNSC Negative	Blood Derived Normal	2.1336
1575	s15673	TCGA-HNSC Positive	Solid Tissue Normal	-1.04032
1576	s15668	TCGA-HNSC Negative	Primary Tumor	1.36642
1577	s15718	TCGA-HNSC Negative	Primary Tumor	1.71263
1578	s15610	TCGA-HNSC Negative	Primary Tumor	-0.522096
1579	s15641	TCGA-HNSC Negative	Primary Tumor	0.333881
1580	s15646	TCGA-HNSC Negative	Primary Tumor	2.02888
1581	s15674	TCGA-HNSC Negative	Primary Tumor	0.698536
1582	s15690	TCGA-HNSC Negative	Primary Tumor	-3.03403
1583	s15714	TCGA-HNSC Negative	Primary Tumor	1.13504
1584	s15719	TCGA-HNSC Negative	Primary Tumor	2.38608
1585	s15685	TCGA-HNSC Positive	Primary Tumor	-0.8511
1586	s15649	TCGA-HNSC Negative	Blood Derived Normal	2.0571
1587	s15625	TCGA-HNSC Negative	Blood Derived Normal	0.363264
1588	s15739	TCGA-HNSC Positive	Primary Tumor	14.4652
1589	s15617	TCGA-HNSC Negative	Primary Tumor	0.134156
1590	s15614	TCGA-HNSC Negative	Blood Derived Normal	-1.50318
1591	s15703	TCGA-HNSC Negative	Primary Tumor	-1.8668
1592	s15630	TCGA-HNSC Negative	Blood Derived Normal	1.6604
1593	s15618	TCGA-HNSC Negative	Blood Derived Normal	0.554302
1594	s15695	TCGA-HNSC Negative	Primary Tumor	2.08013
1595	s15689	TCGA-HNSC Positive	Primary Tumor	3.96198
1596	s15645	TCGA-HNSC Negative	Solid Tissue Normal	1.52029
1597	s15721	TCGA-HNSC Positive	Primary Tumor	10.5493
1598	s15619	TCGA-HNSC Negative	Blood Derived Normal	-0.209658
1599	s15675	TCGA-HNSC Negative	Primary Tumor	-0.270139
1600	s15669	TCGA-HNSC Negative	Primary Tumor	4.27901
1601	s15605	TCGA-HNSC Positive	Primary Tumor	10.628
1602	s15663	TCGA-HNSC Negative	Primary Tumor	1.96799
1603	s15696	TCGA-HNSC Negative	Primary Tumor	1.84447
1604	s15651	TCGA-HNSC Negative	Blood Derived Normal	2.88543
1605	s15715	TCGA-HNSC Negative	Primary Tumor	3.25494
1606	s15699	TCGA-HNSC Negative	Primary Tumor	2.09338
1607	s15720	TCGA-HNSC Negative	Primary Tumor	-1.63306
1608	s15700	TCGA-HNSC Negative	Primary Tumor	1.09314
1609	s15707	TCGA-HNSC Negative	Primary Tumor	0.478855
1610	s15631	TCGA-HNSC Negative	Primary Tumor	1.73168
1611	s15660	TCGA-HNSC Negative	Primary Tumor	-0.861709
1612	s15727	TCGA-HNSC Negative	Primary Tumor	1.79022
1613	s15686	TCGA-HNSC Negative	Primary Tumor	1.78807
1614	s15723	TCGA-HNSC Negative	Primary Tumor	-2.03731
1615	s15633	TCGA-HNSC Negative	Primary Tumor	1.81389
1616	s15734	TCGA-HNSC Positive	Primary Tumor	14.4681
1617	s15628	TCGA-HNSC Negative	Blood Derived Normal	0.365857
1618	s15684	TCGA-HNSC Negative	Solid Tissue Normal	2.0438
1619	s15671	TCGA-HNSC Negative	Primary Tumor	2.38635
1620	s15634	TCGA-HNSC Negative	Primary Tumor	0.69059
1621	s15701	TCGA-HNSC Negative	Primary Tumor	2.8805
1622	s15607	TCGA-HNSC Positive	Primary Tumor	2.25806
1623	s15709	TCGA-HNSC Negative	Solid Tissue Normal	-0.64051
1624	s15636	TCGA-HNSC Positive	Blood Derived Normal	-3.70959
1625	s15726	TCGA-HNSC Positive	Primary Tumor	12.0216
1626	s15702	TCGA-HNSC Positive	Primary Tumor	7.53866
1627	s15710	TCGA-HNSC Negative	Primary Tumor	2.39903
1628	s15740	TCGA-HNSC Negative	Primary Tumor	2.75845
1629	s15683	TCGA-HNSC Positive	Primary Tumor	5.06643
1630	s15662	TCGA-HNSC Negative	Primary Tumor	2.8281
1631	s15627	TCGA-HNSC Negative	Blood Derived Normal	1.21576
1632	s15659	TCGA-HNSC Positive	Primary Tumor	14.2248
1633	s15608	TCGA-HNSC Negative	Blood Derived Normal	2.95101
1634	s15711	TCGA-HNSC Positive	Primary Tumor	3.63596
1635	s15647	TCGA-HNSC Negative	Primary Tumor	2.27172
1636	s15717	TCGA-HNSC Negative	Primary Tumor	6.05333
1637	s15698	TCGA-HNSC Negative	Primary Tumor	1.32112
1638	s15694	TCGA-HNSC Positive	Primary Tumor	15.4712
1639	s15716	TCGA-HNSC Negative	Primary Tumor	-0.955505
1640	s15670	TCGA-HNSC Positive	Primary Tumor	4.16932
1641	s15691	TCGA-HNSC Negative	Solid Tissue Normal	1.24316
1642	s15654	TCGA-HNSC Negative	Blood Derived Normal	-0.0116889
1643	s15612	TCGA-HNSC Negative	Blood Derived Normal	0.240745
1644	s15728	TCGA-HNSC Negative	Primary Tumor	-0.15147
1645	s15658	TCGA-HNSC Negative	Solid Tissue Normal	2.76871
1646	s15638	TCGA-HNSC Negative	Primary Tumor	0.383625
1647	s15722	TCGA-HNSC Negative	Primary Tumor	3.03662
1648	s15666	TCGA-HNSC Negative	Solid Tissue Normal	2.56357
1649	s15667	TCGA-HNSC Negative	Primary Tumor	3.00475
1650	s15738	TCGA-HNSC Negative	Primary Tumor	2.41729
1651	s15687	TCGA-HNSC Negative	Primary Tumor	3.40164
1652	s15692	TCGA-HNSC Positive	Primary Tumor	9.60617
1653	s15606	TCGA-HNSC Positive	Primary Tumor	9.38775
1654	s15672	TCGA-HNSC Positive	Primary Tumor	14.5719
1655	s16230	TCGA-HNSC Positive	Primary Tumor	-5.53002
1656	s16229	TCGA-HNSC Negative	Primary Tumor	3.09094
1657	s16209	TCGA-HNSC Negative	Primary Tumor	2.41142
1658	s16240	TCGA-HNSC Negative	Primary Tumor	1.52398
1659	s16296	TCGA-HNSC Negative	Primary Tumor	-3.29245
1660	s16231	TCGA-HNSC Negative	Primary Tumor	-1.08874
1661	s16217	TCGA-HNSC Negative	Primary Tumor	2.82354
1662	s16249	TCGA-HNSC Negative	Primary Tumor	-1.13867
1663	s16166	TCGA-HNSC Positive	Primary Tumor	9.50254
1664	s16215	TCGA-HNSC Negative	Primary Tumor	5.99991
1665	s16238	TCGA-HNSC Negative	Primary Tumor	3.02401
1666	s16263	TCGA-HNSC Positive	Primary Tumor	14.6476
1667	s16295	TCGA-HNSC Positive	Primary Tumor	3.31451
1668	s16218	TCGA-HNSC Negative	Primary Tumor	-2.2512
1669	s16197	TCGA-HNSC Negative	Primary Tumor	2.27622
1670	s16308	TCGA-HNSC Negative	Primary Tumor	-1.87017
1671	s16202	TCGA-HNSC Negative	Blood Derived Normal	1.47718
1672	s16183	TCGA-HNSC Negative	Blood Derived Normal	-0.298743
1673	s16174	TCGA-HNSC Negative	Blood Derived Normal	1.05703
1674	s16190	TCGA-HNSC Negative	Blood Derived Normal	2.66368
1675	s16300	TCGA-HNSC Negative	Primary Tumor	0.847892
1676	s16267	TCGA-HNSC Positive	Primary Tumor	9.32572
1677	s16216	TCGA-HNSC Negative	Primary Tumor	-2.01712
1678	s16235	TCGA-HNSC Negative	Primary Tumor	1.34571
1679	s16271	TCGA-HNSC Negative	Primary Tumor	3.32394
1680	s16224	TCGA-HNSC Negative	Primary Tumor	-1.74128
1681	s16226	TCGA-HNSC Positive	Primary Tumor	9.80728
1682	s16207	TCGA-HNSC Negative	Blood Derived Normal	-0.145579
1683	s16204	TCGA-HNSC Negative	Blood Derived Normal	0.0260632
1684	s16172	TCGA-HNSC Positive	Blood Derived Normal	2.41272
1685	s16198	TCGA-HNSC Positive	Primary Tumor	13.1788
1686	s16282	TCGA-HNSC Negative	Solid Tissue Normal	7.47375
1687	s16265	TCGA-HNSC Negative	Primary Tumor	1.94211
1688	s16167	TCGA-HNSC Positive	Primary Tumor	17.3162
1689	s16219	TCGA-HNSC Negative	Primary Tumor	1.54445
1690	s16169	TCGA-HNSC Negative	Primary Tumor	0.482542
1691	s16255	TCGA-HNSC Negative	Primary Tumor	-1.48909
1692	s16203	TCGA-HNSC Negative	Solid Tissue Normal	0.0812753
1693	s16201	TCGA-HNSC Negative	Primary Tumor	1.49201
1694	s16189	TCGA-HNSC Negative	Blood Derived Normal	1.74422
1695	s16221	TCGA-HNSC Negative	Primary Tumor	4.09283
1696	s16173	TCGA-HNSC Negative	Blood Derived Normal	3.17535
1697	s16176	TCGA-HNSC Negative	Primary Tumor	0.50703
1698	s16194	TCGA-HNSC Negative	Primary Tumor	2.32979
1699	s16251	TCGA-HNSC Negative	Primary Tumor	2.16351
1700	s16184	TCGA-HNSC Negative	Primary Tumor	12.6963
1701	s16309	TCGA-HNSC Negative	Primary Tumor	3.29449
1702	s16261	TCGA-HNSC Negative	Primary Tumor	-1.52176
1703	s16191	TCGA-HNSC Positive	Solid Tissue Normal	4.4101
1704	s16227	TCGA-HNSC Negative	Primary Tumor	-1.39724
1705	s16305	TCGA-HNSC Positive	Primary Tumor	13.7924
1706	s16213	TCGA-HNSC Negative	Solid Tissue Normal	-0.824473
1707	s16188	TCGA-HNSC Positive	Blood Derived Normal	-2.76376
1708	s16304	TCGA-HNSC Negative	Primary Tumor	3.27242
1709	s16171	TCGA-HNSC Negative	Primary Tumor	1.0133
1710	s16266	TCGA-HNSC Negative	Primary Tumor	2.86855
1711	s16239	TCGA-HNSC Negative	Primary Tumor	0.293558
1712	s16307	TCGA-HNSC Negative	Primary Tumor	1.5091
1713	s16187	TCGA-HNSC Negative	Blood Derived Normal	-0.284288
1714	s16244	TCGA-HNSC Negative	Solid Tissue Normal	-1.13164
1715	s16195	TCGA-HNSC Negative	Blood Derived Normal	2.40421
1716	s16252	TCGA-HNSC Positive	Primary Tumor	12.3713
1717	s16245	TCGA-HNSC Negative	Solid Tissue Normal	-1.2567
1718	s16289	TCGA-HNSC Negative	Primary Tumor	2.86335
1719	s16294	TCGA-HNSC Negative	Primary Tumor	3.34248
1720	s16299	TCGA-HNSC Negative	Primary Tumor	-3.02798
1721	s16164	TCGA-HNSC Positive	Blood Derived Normal	-1.78959
1722	s16193	TCGA-HNSC Negative	Primary Tumor	2.37036
1723	s16236	TCGA-HNSC Negative	Solid Tissue Normal	-1.20697
1724	s16286	TCGA-HNSC Positive	Primary Tumor	15.1307
1725	s16242	TCGA-HNSC Negative	Solid Tissue Normal	2.09284
1726	s16293	TCGA-HNSC Negative	Primary Tumor	4.21
1727	s16301	TCGA-HNSC Positive	Primary Tumor	8.99192
1728	s16288	TCGA-HNSC Negative	Primary Tumor	4.12038
1729	s16297	TCGA-HNSC Negative	Primary Tumor	-0.979777
1730	s16186	TCGA-HNSC Negative	Primary Tumor	1.89274
1731	s16170	TCGA-HNSC Positive	Blood Derived Normal	0.443086
1732	s16234	TCGA-HNSC Negative	Primary Tumor	4.00075
1733	s16200	TCGA-HNSC Negative	Blood Derived Normal	2.87864
1734	s16180	TCGA-HNSC Negative	Primary Tumor	2.91253
1735	s16205	TCGA-HNSC Negative	Solid Tissue Normal	0.0455307
1736	s16257	TCGA-HNSC Positive	Primary Tumor	-5.7031
1737	s16182	TCGA-HNSC Negative	Blood Derived Normal	0.25255
1738	s16178	TCGA-HNSC Negative	Primary Tumor	0.684518
1739	s16284	TCGA-HNSC Negative	Primary Tumor	-1.45744
1740	s16269	TCGA-HNSC Negative	Primary Tumor	2.77334
1741	s16232	TCGA-HNSC Negative	Primary Tumor	-0.0767264
1742	s16283	TCGA-HNSC Negative	Primary Tumor	2.17529
1743	s16262	TCGA-HNSC Negative	Primary Tumor	4.30413
1744	s16258	TCGA-HNSC Negative	Primary Tumor	4.76633
1745	s16185	TCGA-HNSC Positive	Blood Derived Normal	0.477909
1746	s16225	TCGA-HNSC Negative	Primary Tumor	3.09286
1747	s16220	TCGA-HNSC Negative	Primary Tumor	2.49574
1748	s16192	TCGA-HNSC Negative	Primary Tumor	0.492905
1749	s16248	TCGA-HNSC Positive	Primary Tumor	10.6478
1750	s16259	TCGA-HNSC Negative	Primary Tumor	1.81027
1751	s16302	TCGA-HNSC Negative	Primary Tumor	1.64059
1752	s16277	TCGA-HNSC Negative	Primary Tumor	1.40264
1753	s16247	TCGA-HNSC Positive	Primary Tumor	14.0073
1754	s16241	TCGA-HNSC Positive	Primary Tumor	10.5701
1755	s16276	TCGA-HNSC Negative	Primary Tumor	2.90051
1756	s16177	TCGA-HNSC Negative	Primary Tumor	1.76635
1757	s16237	TCGA-HNSC Negative	Primary Tumor	1.38094
1758	s16310	TCGA-HNSC Negative	Primary Tumor	5.04009
1759	s16281	TCGA-HNSC Negative	Primary Tumor	-1.8657
1760	s16280	TCGA-HNSC Negative	Primary Tumor	0.254346
1761	s16179	TCGA-HNSC Positive	Blood Derived Normal	2.5972
1762	s16292	TCGA-HNSC Negative	Primary Tumor	4.30175
1763	s16291	TCGA-HNSC Negative	Primary Tumor	4.97781
1764	s16199	TCGA-HNSC Negative	Solid Tissue Normal	-0.187138
1765	s16228	TCGA-HNSC Positive	Primary Tumor	10.074
1766	s16206	TCGA-HNSC Negative	Blood Derived Normal	-0.771743
1767	s16260	TCGA-HNSC Negative	Primary Tumor	-1.44872
1768	s16290	TCGA-HNSC Negative	Primary Tumor	-1.23029
1769	s16264	TCGA-HNSC Positive	Primary Tumor	4.97107
1770	s16270	TCGA-HNSC Negative	Primary Tumor	-2.07279
1771	s16196	TCGA-HNSC Negative	Primary Tumor	2.59595
1772	s16287	TCGA-HNSC Negative	Primary Tumor	4.11257
1773	s16285	TCGA-HNSC Negative	Primary Tumor	-1.64348
1774	s16233	TCGA-HNSC Negative	Solid Tissue Normal	3.10963
1775	s16250	TCGA-HNSC Negative	Solid Tissue Normal	2.26355
1776	s16222	TCGA-HNSC Negative	Primary Tumor	3.65902
1777	s16279	TCGA-HNSC Negative	Primary Tumor	-1.69047
1778	s16175	TCGA-HNSC Negative	Blood Derived Normal	3.60075
1779	s16165	TCGA-HNSC Positive	Blood Derived Normal	0.706687
1780	s16268	TCGA-HNSC Negative	Primary Tumor	2.22008
1781	s16210	TCGA-HNSC Positive	Primary Tumor	-1.98906
1782	s16212	TCGA-HNSC Negative	Primary Tumor	2.37875
1783	s16256	TCGA-HNSC Negative	Primary Tumor	-1.46297
1784	s16275	TCGA-HNSC Positive	Primary Tumor	13.8551
1785	s16253	TCGA-HNSC Negative	Primary Tumor	-1.07156
1786	s16243	TCGA-HNSC Positive	Primary Tumor	-1.59075
1787	s16163	TCGA-HNSC Positive	Primary Tumor	9.41429
1788	s16246	TCGA-HNSC Positive	Primary Tumor	-0.459324
1789	s16273	TCGA-HNSC Negative	Primary Tumor	3.07395
1790	s16254	TCGA-HNSC Negative	Solid Tissue Normal	0.839979
1791	s16298	TCGA-HNSC Negative	Primary Tumor	0.916448
1792	s16223	TCGA-HNSC Negative	Primary Tumor	5.19113
1793	s16306	TCGA-HNSC Negative	Primary Tumor	-2.44671
1794	s16168	TCGA-HNSC Negative	Primary Tumor	0.583914
1795	s16303	TCGA-HNSC Negative	Primary Tumor	3.56962
1796	s16211	TCGA-HNSC Negative	Primary Tumor	3.50714
1797	s16272	TCGA-HNSC Negative	Primary Tumor	3.68489
1798	s16181	TCGA-HNSC Negative	Primary Tumor	0.762906
1799	s16278	TCGA-HNSC Negative	Primary Tumor	0.831931
1800	s16214	TCGA-HNSC Negative	Primary Tumor	3.42451
1801	s15527	TCGA-HNSC Negative	Blood Derived Normal	-0.278388
1802	s15483	TCGA-HNSC Positive	Blood Derived Normal	1.84742
1803	s15518	TCGA-HNSC Negative	Blood Derived Normal	2.10005
1804	s15526	TCGA-HNSC Negative	Primary Tumor	1.52116
1805	s15552	TCGA-HNSC Negative	Primary Tumor	-1.57041
1806	s15584	TCGA-HNSC Negative	Primary Tumor	2.50782
1807	s15571	TCGA-HNSC Negative	Primary Tumor	3.30226
1808	s15537	TCGA-HNSC Negative	Primary Tumor	3.65622
1809	s15557	TCGA-HNSC Positive	Solid Tissue Normal	2.21494
1810	s15540	TCGA-HNSC Positive	Primary Tumor	2.8555
1811	s15509	TCGA-HNSC Negative	Primary Tumor	0.154618
1812	s15484	TCGA-HNSC Positive	Primary Tumor	15.4984
1813	s15582	TCGA-HNSC Positive	Primary Tumor	17.0658
1814	s15590	TCGA-HNSC Negative	Solid Tissue Normal	-1.97041
1815	s15534	TCGA-HNSC Negative	Primary Tumor	1.51945
1816	s15504	TCGA-HNSC Positive	Primary Tumor	0.0505714
1817	s15500	TCGA-HNSC Negative	Primary Tumor	1.39975
1818	s15493	TCGA-HNSC Negative	Primary Tumor	0.891093
1819	s15485	TCGA-HNSC Positive	Blood Derived Normal	2.68691
1820	s15585	TCGA-HNSC Negative	Primary Tumor	-0.607404
1821	s15599	TCGA-HNSC Positive	Primary Tumor	13.3409
1822	s15562	TCGA-HNSC Negative	Solid Tissue Normal	4.00261
1823	s15531	TCGA-HNSC Negative	Primary Tumor	3.17102
1824	s15551	TCGA-HNSC Negative	Solid Tissue Normal	1.81419
1825	s15516	TCGA-HNSC Negative	Primary Tumor	3.10398
1826	s15508	TCGA-HNSC Negative	Blood Derived Normal	1.72378
1827	s15587	TCGA-HNSC Negative	Primary Tumor	3.1687
1828	s15596	TCGA-HNSC Negative	Primary Tumor	-1.31558
1829	s15544	TCGA-HNSC Negative	Primary Tumor	-0.787957
1830	s15572	TCGA-HNSC Negative	Primary Tumor	3.06714
1831	s15486	TCGA-HNSC Positive	Primary Tumor	7.14601
1832	s15517	TCGA-HNSC Negative	Blood Derived Normal	2.57022
1833	s15564	TCGA-HNSC Negative	Primary Tumor	4.36238
1834	s15487	TCGA-HNSC Negative	Blood Derived Normal	3.97661
1835	s15546	TCGA-HNSC Negative	Primary Tumor	-0.923483
1836	s15497	TCGA-HNSC Positive	Primary Tumor	4.1093
1837	s15574	TCGA-HNSC Negative	Solid Tissue Normal	0.707692
1838	s15496	TCGA-HNSC Negative	Primary Tumor	2.98575
1839	s15600	TCGA-HNSC Negative	Primary Tumor	1.15635
1840	s15594	TCGA-HNSC Positive	Primary Tumor	3.94514
1841	s15567	TCGA-HNSC Negative	Primary Tumor	-6.05414
1842	s15507	TCGA-HNSC Negative	Blood Derived Normal	1.36561
1843	s15528	TCGA-HNSC Negative	Primary Tumor	-0.0886822
1844	s15513	TCGA-HNSC Negative	Solid Tissue Normal	2.18247
1845	s15561	TCGA-HNSC Negative	Primary Tumor	-2.0301
1846	s15568	TCGA-HNSC Negative	Primary Tumor	-0.57287
1847	s15525	TCGA-HNSC Negative	Blood Derived Normal	0.89215
1848	s15511	TCGA-HNSC Positive	Primary Tumor	16.1554
1849	s15543	TCGA-HNSC Negative	Primary Tumor	-1.22843
1850	s15510	TCGA-HNSC Negative	Solid Tissue Normal	1.9957
1851	s15601	TCGA-HNSC Positive	Primary Tumor	3.32108
1852	s15566	TCGA-HNSC Negative	Primary Tumor	1.1703
1853	s15502	TCGA-HNSC Negative	Blood Derived Normal	0.197687
1854	s15553	TCGA-HNSC Negative	Primary Tumor	-1.20852
1855	s15560	TCGA-HNSC Negative	Primary Tumor	0.888545
1856	s15598	TCGA-HNSC Negative	Primary Tumor	1.127
1857	s15499	TCGA-HNSC Negative	Blood Derived Normal	-1.67637
1858	s15498	TCGA-HNSC Negative	Primary Tumor	3.12866
1859	s15501	TCGA-HNSC Negative	Primary Tumor	4.33868
1860	s15588	TCGA-HNSC Negative	Primary Tumor	1.18895
1861	s15575	TCGA-HNSC Negative	Primary Tumor	4.93431
1862	s15536	TCGA-HNSC Negative	Primary Tumor	0.63702
1863	s15592	TCGA-HNSC Negative	Primary Tumor	-1.80798
1864	s15519	TCGA-HNSC Negative	Blood Derived Normal	-0.302196
1865	s15556	TCGA-HNSC Negative	Primary Tumor	3.54629
1866	s15491	TCGA-HNSC Positive	Blood Derived Normal	0.279374
1867	s15558	TCGA-HNSC Negative	Primary Tumor	3.56526
1868	s15541	TCGA-HNSC Negative	Primary Tumor	3.16623
1869	s15586	TCGA-HNSC Negative	Primary Tumor	3.75822
1870	s15514	TCGA-HNSC Negative	Blood Derived Normal	-1.36767
1871	s15482	TCGA-HNSC Positive	Solid Tissue Normal	5.24838
1872	s15523	TCGA-HNSC Negative	Primary Tumor	-0.515804
1873	s15535	TCGA-HNSC Negative	Primary Tumor	1.99248
1874	s15506	TCGA-HNSC Negative	Primary Tumor	-0.790925
1875	s15550	TCGA-HNSC Negative	Primary Tumor	1.93678
1876	s15489	TCGA-HNSC Negative	Blood Derived Normal	1.98734
1877	s15492	TCGA-HNSC Negative	Blood Derived Normal	2.27711
1878	s15579	TCGA-HNSC Negative	Primary Tumor	0.707583
1879	s15548	TCGA-HNSC Positive	Primary Tumor	9.02601
1880	s15569	TCGA-HNSC Negative	Primary Tumor	-0.66357
1881	s15559	TCGA-HNSC Negative	Primary Tumor	3.11205
1882	s15521	TCGA-HNSC Negative	Solid Tissue Normal	1.00972
1883	s15494	TCGA-HNSC Negative	Blood Derived Normal	2.38484
1884	s15580	TCGA-HNSC Negative	Primary Tumor	4.34247
1885	s15563	TCGA-HNSC Positive	Primary Tumor	10.9076
1886	s15539	TCGA-HNSC Negative	Primary Tumor	5.52796
1887	s15593	TCGA-HNSC Negative	Primary Tumor	-4.97404
1888	s15595	TCGA-HNSC Negative	Primary Tumor	2.2468
1889	s15505	TCGA-HNSC Negative	Blood Derived Normal	3.31881
1890	s15490	TCGA-HNSC Positive	Primary Tumor	15
1891	s15581	TCGA-HNSC Negative	Primary Tumor	6.43498
1892	s15554	TCGA-HNSC Positive	Primary Tumor	10.811
1893	s15529	TCGA-HNSC Negative	Primary Tumor	1.06491
1894	s15520	TCGA-HNSC Negative	Primary Tumor	1.4759
1895	s15515	TCGA-HNSC Positive	Primary Tumor	5.55628
1896	s15545	TCGA-HNSC Negative	Primary Tumor	2.6923
1897	s15591	TCGA-HNSC Negative	Primary Tumor	3.15412
1898	s15524	TCGA-HNSC Negative	Blood Derived Normal	0.117978
1899	s15549	TCGA-HNSC Negative	Primary Tumor	3.53326
1900	s15538	TCGA-HNSC Negative	Primary Tumor	0.240813
1901	s15589	TCGA-HNSC Negative	Primary Tumor	3.86359
1902	s15512	TCGA-HNSC Negative	Solid Tissue Normal	2.37154
1903	s15578	TCGA-HNSC Negative	Primary Tumor	7.65552
1904	s15533	TCGA-HNSC Positive	Blood Derived Normal	1.3567
1905	s15522	TCGA-HNSC Negative	Blood Derived Normal	-0.608281
1906	s15488	TCGA-HNSC Negative	Primary Tumor	0.641254
1907	s15577	TCGA-HNSC Negative	Primary Tumor	2.50591
1908	s15532	TCGA-HNSC Negative	Primary Tumor	0.0594786
1909	s15570	TCGA-HNSC Negative	Primary Tumor	2.66097
1910	s15555	TCGA-HNSC Negative	Primary Tumor	-1.21503
1911	s15495	TCGA-HNSC Negative	Primary Tumor	0.654422
1912	s15576	TCGA-HNSC Positive	Primary Tumor	10.6199
1913	s15530	TCGA-HNSC Negative	Blood Derived Normal	2.76181
1914	s15565	TCGA-HNSC Negative	Primary Tumor	3.18365
1915	s15597	TCGA-HNSC Negative	Solid Tissue Normal	1.2261
1916	s15503	TCGA-HNSC Negative	Primary Tumor	0.593017
1917	s15573	TCGA-HNSC Negative	Primary Tumor	3.90794
1918	s15542	TCGA-HNSC Negative	Solid Tissue Normal	-2.01878
1919	s15547	TCGA-HNSC Negative	Primary Tumor	-3.40261
1920	s16069	TCGA-HNSC Negative	Primary Tumor	3.32625
1921	s16045	TCGA-HNSC Negative	Solid Tissue Normal	0.235332
1922	s16041	TCGA-HNSC Negative	Primary Tumor	0.25162
1923	s16040	TCGA-HNSC Negative	Primary Tumor	-1.52359
1924	s16018	TCGA-HNSC Positive	Blood Derived Normal	0.382488
1925	s16129	TCGA-HNSC Negative	Primary Tumor	2.02638
1926	s16098	TCGA-HNSC Positive	Primary Tumor	3.22358
1927	s16088	TCGA-HNSC Negative	Primary Tumor	4.08791
1928	s16160	TCGA-HNSC Negative	Primary Tumor	2.36038
1929	s16151	TCGA-HNSC Negative	Primary Tumor	1.97905
1930	s16034	TCGA-HNSC Negative	Blood Derived Normal	8.05114
1931	s16120	TCGA-HNSC Positive	Primary Tumor	14.4438
1932	s16146	TCGA-HNSC Negative	Primary Tumor	2.12614
1933	s16052	TCGA-HNSC Negative	Primary Tumor	1.3272
1934	s16043	TCGA-HNSC Negative	Blood Derived Normal	2.37164
1935	s16075	TCGA-HNSC Negative	Primary Tumor	1.71992
1936	s16078	TCGA-HNSC Negative	Primary Tumor	4.8273
1937	s16044	TCGA-HNSC Negative	Solid Tissue Normal	2.98333
1938	s16104	TCGA-HNSC Negative	Solid Tissue Normal	-0.850378
1939	s16092	TCGA-HNSC Negative	Primary Tumor	3.69965
1940	s16097	TCGA-HNSC Negative	Primary Tumor	2.74681
1941	s16066	TCGA-HNSC Negative	Primary Tumor	-1.52991
1942	s16123	TCGA-HNSC Negative	Primary Tumor	3.24973
1943	s16148	TCGA-HNSC Negative	Primary Tumor	-2.19587
1944	s16130	TCGA-HNSC Negative	Primary Tumor	3.99537
1945	s16061	TCGA-HNSC Negative	Primary Tumor	0.827618
1946	s16136	TCGA-HNSC Negative	Primary Tumor	-1.40254
1947	s16046	TCGA-HNSC Positive	Solid Tissue Normal	3.24948
1948	s16074	TCGA-HNSC Negative	Primary Tumor	3.39316
1949	s16035	TCGA-HNSC Negative	Primary Tumor	2.6506
1950	s16089	TCGA-HNSC Negative	Primary Tumor	2.68108
1951	s16141	TCGA-HNSC Negative	Primary Tumor	2.91147
1952	s16022	TCGA-HNSC Positive	Primary Tumor	9.2941
1953	s16037	TCGA-HNSC Negative	Primary Tumor	-0.623976
1954	s16025	TCGA-HNSC Negative	Blood Derived Normal	1.61616
1955	s16073	TCGA-HNSC Positive	Primary Tumor	-1.96268
1956	s16085	TCGA-HNSC Negative	Primary Tumor	0.761364
1957	s16156	TCGA-HNSC Negative	Primary Tumor	1.31187
1958	s16083	TCGA-HNSC Negative	Primary Tumor	6.47073
1959	s16162	TCGA-HNSC Positive	Primary Tumor	10.6976
1960	s16049	TCGA-HNSC Negative	Blood Derived Normal	-0.292883
1961	s16091	TCGA-HNSC Negative	Primary Tumor	1.23919
1962	s16106	TCGA-HNSC Negative	Primary Tumor	-0.786734
1963	s16100	TCGA-HNSC Positive	Solid Tissue Normal	2.16655
1964	s16036	TCGA-HNSC Negative	Blood Derived Normal	-0.614262
1965	s16152	TCGA-HNSC Negative	Primary Tumor	0.336486
1966	s16147	TCGA-HNSC Negative	Primary Tumor	1.77324
1967	s16064	TCGA-HNSC Positive	Primary Tumor	0.943067
1968	s16070	TCGA-HNSC Negative	Primary Tumor	2.46055
1969	s16079	TCGA-HNSC Negative	Primary Tumor	-1.41089
1970	s16028	TCGA-HNSC Negative	Primary Tumor	2.13473
1971	s16140	TCGA-HNSC Negative	Primary Tumor	3.96253
1972	s16157	TCGA-HNSC Negative	Primary Tumor	1.74445
1973	s16071	TCGA-HNSC Positive	Primary Tumor	10.4867
1974	s16109	TCGA-HNSC Negative	Primary Tumor	1.32451
1975	s16024	TCGA-HNSC Positive	Primary Tumor	8.02271
1976	s16026	TCGA-HNSC Negative	Blood Derived Normal	-0.9513
1977	s16017	TCGA-HNSC Positive	Primary Tumor	14.7438
1978	s16134	TCGA-HNSC Negative	Primary Tumor	3.70086
1979	s16118	TCGA-HNSC Negative	Primary Tumor	2.62077
1980	s16114	TCGA-HNSC Negative	Primary Tumor	1.50172
1981	s16099	TCGA-HNSC Negative	Solid Tissue Normal	3.339
1982	s16115	TCGA-HNSC Negative	Primary Tumor	1.87222
1983	s16084	TCGA-HNSC Negative	Solid Tissue Normal	-0.903238
1984	s16020	TCGA-HNSC Positive	Blood Derived Normal	1.27854
1985	s16142	TCGA-HNSC Negative	Primary Tumor	2.09724
1986	s16113	TCGA-HNSC Negative	Primary Tumor	0.723578
1987	s16102	TCGA-HNSC Positive	Primary Tumor	9.20926
1988	s16023	TCGA-HNSC Positive	Primary Tumor	6.88671
1989	s16072	TCGA-HNSC Negative	Primary Tumor	2.39009
1990	s16144	TCGA-HNSC Negative	Primary Tumor	5.45392
1991	s16105	TCGA-HNSC Positive	Primary Tumor	-1.41638
1992	s16126	TCGA-HNSC Positive	Primary Tumor	10.1856
1993	s16033	TCGA-HNSC Positive	Primary Tumor	4.23236
1994	s16133	TCGA-HNSC Negative	Primary Tumor	2.43664
1995	s16149	TCGA-HNSC Negative	Primary Tumor	1.94925
1996	s16128	TCGA-HNSC Positive	Primary Tumor	9.55065
1997	s16145	TCGA-HNSC Negative	Primary Tumor	6.36912
1998	s16107	TCGA-HNSC Negative	Solid Tissue Normal	4.38643
1999	s16111	TCGA-HNSC Negative	Primary Tumor	1.49976
[truncated: 14,946 more rows]
