# Supplementary material for: RETRACTED ARTICLE: Microbiome analyses of blood and tissues suggest cancerdiagnostic approach
Source: Springer Nature journal article supplement (doi:10.1038/s41586-020-2095-1), 2020-03-11
Supplement: 41586_2020_2095_MOESM12_ESM.xlsx [file 41586_2020_2095_MOESM12_ESM.xlsx]

## Sheet: Fig 4b
	Proportion taxa remaining	Proportion taxa discarded	Proportion reads remaining	Proportion reads discarded
Likely Contaminants Removed	0.866533	0.133467	0.908785	0.091215
Plate-Center Contaminants Removed	0.750627	0.249373	0.335135	0.664865
All Putative Contaminants Removed	0.821877	0.178123	0.268807	0.731193
Most Stringent Filtering	0.0868038	0.913196	0.077033	0.922967

## Sheet: Fig 4c
Body site	Anterior nares	Buccal mucosa	L_Retroauricular crease	Posterior fornix	R_Retroauricular crease	Stool	Supragingival plaque	Tongue dorsum	Unknown
Mean	0.0174057	0.0124071	0.00139714	0.00128714	0.00133857	0.210813	0.00468571	0.00949286	0.741173
SE	0.00156326	0.00169882	7.65988e-05	0.000157042	9.05765e-05	0.026153	0.00019744	0.000564334	0.0259021
SampleID	Anterior nares	Buccal mucosa	L_Retroauricular crease	Posterior fornix	R_Retroauricular crease	Stool	Supragingival plaque	Tongue dorsum	Unknown
s13129	0.0147	0.0065	0.0017	0.0004	0.0021	0.1154	0.0035	0.0079	0.8478
s13623	0.0068	0.0097	0.0003	0.0005	0.0002	0.0472	0.0035	0.0066	0.9252
s13590	0.0196	0.0037	0.0015	0.0004	0.0015	0.023	0.0028	0.0048	0.9427
s13687	0.005	0.0033	0.0013	0.0004	0.001	0.1582	0.0018	0.0036	0.8254
s13127	0.0032	0.0041	0.001	0.0003	0.0007	0.121	0.0041	0.006	0.8596
s13031	0.0283	0.0299	0.0017	0.0043	0.0013	0.1755	0.0063	0.0141	0.7386
s13385	0.0059	0.0149	0.0005	0.002	0.0001	0.2561	0.0049	0.0155	0.7001
s13382	0.0061	0.0096	0.001	0.0018	0.0001	0.6846	0.0064	0.0146	0.2758
s12885	0.0202	0.0452	0.0018	0.0027	0.0014	0.4232	0.0068	0.0212	0.4775
s13510	0.0043	0.0032	0.0003	0.0007	0.0001	0.8826	0.005	0.0218	0.082
s13261	0.0423	0.0055	0.0019	0.0012	0.0034	0.0979	0.0044	0.0105	0.8329
s13841	0.0162	0.0264	0.002	0.0018	0.0018	0.3976	0.0067	0.0134	0.5341
s13103	0.0151	0.0217	0.0011	0.0065	0.0016	0.0737	0.0042	0.0117	0.8644
s13751	0.0057	0.0035	0.0004	0.0003	0.0004	0.11	0.0031	0.0068	0.8698
s13305	0.0137	0.0061	0.0012	0.0016	0.0014	0.109	0.0037	0.008	0.8553
s13131	0.012	0.0087	0.0008	0.0003	0.0015	0.0945	0.0043	0.0095	0.8684
s12866	0.0215	0.0245	0.0016	0.0027	0.0024	0.2258	0.0082	0.0204	0.6929
s13282	0.0123	0.0124	0.001	0.0007	0.0006	0.1151	0.0062	0.0103	0.8414
s13352	0.0091	0.0111	0.0013	0.0019	0.0005	0.8472	0.0037	0.0044	0.1208
s13383	0.0004	0.0001	0.0001	0	0	0.2333	0.0003	0.0007	0.7651
s13384	0.0291	0.0191	0.002	0.0005	0.0015	0.155	0.0081	0.0148	0.7699
s13790	0.0107	0.0118	0.0013	0.0014	0.0007	0.2951	0.0054	0.0089	0.6647
s13463	0.0822	0.0177	0.0021	0.0068	0.0018	0.113	0.0073	0.0082	0.7609
s13464	0.0082	0.0073	0.001	0.0006	0.0005	0.0653	0.0043	0.0065	0.9063
s13591	0.0286	0.0049	0.0017	0.0006	0.0022	0.0924	0.0042	0.0073	0.8581
s13295	0.0063	0.0027	0.0005	0.0007	0.0005	0.0674	0.0032	0.0042	0.9145
s13077	0.0328	0.0029	0.0021	0.0017	0.0015	0.1102	0.0035	0.0082	0.8371
s13128	0.0216	0.0037	0.0018	0.0023	0.0016	0.0725	0.0034	0.0051	0.888
s13622	0.0268	0.0046	0.0015	0.0005	0.0016	0.081	0.0029	0.0067	0.8744
s13608	0.0102	0.0143	0.0009	0.0002	0.0017	0.0978	0.0049	0.0095	0.8605
s13601	0.028	0.0056	0.0018	0.0003	0.0024	0.1461	0.0041	0.0084	0.8033
s12883	0.0004	0.0002	0	0.0001	0.0002	0.316	0.0002	0	0.6829
s13082	0.0164	0.0061	0.0018	0.0004	0.0014	0.1484	0.006	0.0089	0.8106
s12971	0.0131	0.0078	0.0006	0.0008	0.0018	0.1442	0.0037	0.0066	0.8214
s13280	0.01	0.0073	0.0013	0.0023	0.0012	0.1078	0.005	0.0106	0.8545
s13134	0.0111	0.007	0.0014	0.0018	0.0008	0.1748	0.0028	0.0063	0.794
s13529	0.0446	0.0173	0.0013	0.0016	0.0026	0.1022	0.006	0.0128	0.8116
s13017	0.0051	0.0019	0.0017	0.0005	0.0007	0.892	0.0027	0.0074	0.088
s13133	0.0038	0.003	0.0005	0.0005	0.0003	0.0691	0.0026	0.0034	0.9168
s13443	0.0118	0.0055	0.0015	0.0003	0.0009	0.1944	0.0049	0.0083	0.7724
s12972	0.0195	0.0043	0.0013	0.0012	0.0014	0.0595	0.0029	0.0038	0.9061
s13512	0.0066	0.0061	0.0016	0.0007	0.0008	0.8541	0.0041	0.005	0.121
s13838	0.0101	0.007	0.0016	0.0018	0.0016	0.7204	0.0068	0.0069	0.2438
s13380	0.0221	0.0187	0.0012	0.0041	0.0022	0.1045	0.0042	0.0094	0.8336
s13503	0.0214	0.0376	0.0018	0.0008	0.0016	0.0971	0.0059	0.0152	0.8186
s13275	0.0199	0.0143	0.0008	0.0028	0.0021	0.1308	0.0056	0.0087	0.815
s13614	0.0301	0.0061	0.0016	0.0013	0.0027	0.1314	0.0047	0.0095	0.8126
s13110	0.0154	0.0087	0.001	0.0015	0.0017	0.0921	0.0048	0.0077	0.8671
s13033	0.0227	0.016	0.0024	0.0018	0.0015	0.1421	0.0058	0.014	0.7937
s13661	0.0146	0.0096	0.0028	0.0004	0.0021	0.4037	0.0044	0.0085	0.5539
s13653	0.0119	0.0057	0.0026	0.0004	0.001	0.7557	0.0042	0.0053	0.2132
s13860	0.0053	0.0007	0.0003	0.0002	0.0008	0.0623	0.003	0.0041	0.9233
s12875	0.0287	0.0166	0.0022	0.002	0.0019	0.1024	0.0055	0.012	0.8287
s13531	0.0251	0.021	0.0021	0.0028	0.0012	0.1043	0.0058	0.0167	0.821
s13262	0.0347	0.0092	0.002	0.0004	0.0029	0.1322	0.0038	0.0102	0.8046
s12974	0.0185	0.0044	0.0016	0.0003	0.0017	0.152	0.0066	0.0113	0.8036
s12973	0.0296	0.0057	0.0013	0.0002	0.0022	0.1018	0.0048	0.0079	0.8465
s13445	0.0036	0.004	0.0008	0.0002	0.0003	0.0771	0.004	0.0059	0.9041
s13760	0.0307	0.0168	0.0019	0.0004	0.0021	0.0383	0.0061	0.0097	0.894
s13477	0.0062	0.0042	0.0007	0.0008	0.0009	0.1461	0.0035	0.0048	0.8328
s13528	0.0154	0.0901	0.0019	0.0014	0.0012	0.0671	0.0075	0.0136	0.8018
s13306	0.0054	0.0056	0.0006	0.0003	0.0008	0.0997	0.0035	0.0063	0.8778
s12934	0.0418	0.0111	0.0021	0.0017	0.0019	0.0892	0.0048	0.0092	0.8382
s13470	0.0058	0.0087	0.0007	0.0006	0.0002	0.1315	0.0038	0.0095	0.8392
s13526	0.0195	0.0121	0.0018	0.0009	0.0011	0.1257	0.0044	0.0118	0.8227
s13308	0.0098	0.0073	0.0014	0.0025	0.0009	0.2123	0.005	0.0058	0.755
s12865	0.0123	0.0265	0.0014	0.0006	0.0014	0.1527	0.0065	0.0156	0.783
s13180	0.018	0.0166	0.0023	0.0019	0.0024	0.1344	0.0066	0.0144	0.8034
s12874	0.0276	0.0098	0.0023	0.0012	0.0014	0.3798	0.0078	0.0158	0.5543
s13208	0.0229	0.0632	0.0024	0.0005	0.0017	0.321	0.0065	0.022	0.5598

## Sheet: Fig 4d
Body site	Anterior nares	Buccal mucosa	L_Retroauricular crease	Posterior fornix	R_Retroauricular crease	Stool	Supragingival plaque	Tongue dorsum	Unknown
Mean	0.00728857	0.00254571	0.00898714	0.00108286	0.0179157	0.237791	0.00347571	0.00490714	0.716006
SE	0.000233513	0.000105906	0.000444208	0.000197111	0.000712955	0.026139	0.00015991	0.000280736	0.0266688
SampleID	Anterior nares	Buccal mucosa	L_Retroauricular crease	Posterior fornix	R_Retroauricular crease	Stool	Supragingival plaque	Tongue dorsum	Unknown
s13180	0.006	0.0036	0.0065	0.0012	0.0183	0.1876	0.0038	0.0056	0.7674
s12874	0.0069	0.0025	0.0111	0.0002	0.0295	0.4878	0.0057	0.0066	0.4497
s13208	0.0104	0.0031	0.01	0.0022	0.0269	0.3903	0.0057	0.0073	0.5441
s13445	0.0051	0.0038	0.0056	0.0003	0.0111	0.0837	0.0033	0.0048	0.8823
s12973	0.0079	0.0019	0.008	0.0001	0.0173	0.115	0.0036	0.0041	0.8421
s13262	0.0066	0.003	0.0074	0.0031	0.0147	0.1796	0.004	0.0043	0.7773
s12974	0.0071	0.0034	0.0119	0.0001	0.0175	0.1508	0.0072	0.0076	0.7944
s12865	0.0097	0.0035	0.008	0.001	0.0149	0.1877	0.004	0.0031	0.7681
s13526	0.007	0.0029	0.0095	0.0002	0.0198	0.1889	0.0047	0.0043	0.7627
s13308	0.0065	0.0021	0.0093	0	0.0142	0.2122	0.0018	0.0039	0.75
s13528	0.0085	0.0026	0.0066	0.0012	0.0207	0.1286	0.0034	0.0053	0.8231
s13306	0.0075	0.0005	0.0053	0.0002	0.0125	0.0741	0.0019	0.0017	0.8963
s12934	0.0073	0.0037	0.0116	0.0002	0.0165	0.1302	0.0032	0.0064	0.8209
s13470	0.0076	0.0039	0.0086	0.0001	0.0137	0.1535	0.0031	0.0051	0.8044
s13760	0.0087	0.0027	0.0069	0.0002	0.0159	0.0466	0.0031	0.0071	0.9088
s13477	0.0084	0.0024	0.0084	0	0.012	0.1519	0.0031	0.0037	0.8101
s13033	0.0102	0.0031	0.0103	0.0013	0.026	0.2053	0.0034	0.0064	0.734
s13661	0.0064	0.0025	0.0099	0	0.0224	0.4423	0.0033	0.0045	0.5087
s13110	0.0058	0.0024	0.0071	0	0.0154	0.1153	0.0042	0.0042	0.8456
s13380	0.0102	0.0024	0.0085	0.0027	0.021	0.1466	0.0034	0.0055	0.7997
s13503	0.0062	0.0027	0.0118	0.0039	0.0277	0.1414	0.0036	0.0069	0.7958
s13275	0.0074	0.0014	0.01	0.0019	0.0244	0.1597	0.0043	0.0044	0.7865
s13614	0.0042	0.0013	0.0062	0	0.014	0.1445	0.0027	0.0048	0.8223
s12875	0.0055	0.0033	0.01	0.0023	0.0176	0.1493	0.0032	0.0055	0.8033
s13531	0.0083	0.0019	0.0066	0.0013	0.0189	0.1516	0.004	0.0048	0.8026
s13860	0.0102	0.0024	0.0161	0.0012	0.0229	0.271	0.0029	0.0057	0.6676
s13653	0.0086	0.0012	0.0155	0.0002	0.0292	0.7408	0.0019	0.0044	0.1982
s13017	0.0058	0.0017	0.0071	0	0.0106	0.898	0.0016	0.0022	0.073
s13133	0.0079	0.0024	0.0097	0.002	0.0168	0.1298	0.0027	0.0044	0.8243
s13134	0.0085	0.0021	0.0082	0.0011	0.0178	0.1789	0.0041	0.0043	0.775
s13529	0.0069	0.003	0.0123	0.0015	0.022	0.1495	0.0035	0.0043	0.797
s13280	0.0083	0.0022	0.0099	0.002	0.0158	0.1245	0.0046	0.0067	0.826
s12972	0.004	0.0021	0.0072	0.0002	0.0112	0.0456	0.0024	0.002	0.9253
s13512	0.0073	0.0025	0.0134	0.0011	0.0256	0.8465	0.0035	0.0022	0.0979
s13838	0.0105	0.0023	0.0261	0.0028	0.0251	0.746	0.002	0.0032	0.182
s13443	0.0108	0.0027	0.01	0.0005	0.0173	0.19	0.0028	0.0056	0.7603
s12971	0.007	0.0032	0.0088	0	0.0158	0.1637	0.003	0.0033	0.7952
s13601	0.0069	0.0029	0.0092	0.0003	0.0184	0.1586	0.0023	0.0032	0.7982
s12883	0.0051	0.0004	0.0029	0	0.0027	0.2729	0.0006	0.0005	0.7149
s13082	0.0071	0.0035	0.0099	0.0014	0.0204	0.1542	0.0052	0.0074	0.7909
s13608	0.0064	0.0037	0.0062	0.0002	0.0172	0.1178	0.0042	0.0067	0.8376
s13790	0.0066	0.0023	0.011	0	0.0274	0.3093	0.0039	0.0058	0.6337
s13384	0.0116	0.0047	0.0111	0.0025	0.0266	0.1841	0.006	0.0088	0.7446
s13352	0.0053	0.0016	0.0094	0.0001	0.0176	0.8607	0.0011	0.0015	0.1027
s13383	0.0034	0.0004	0.0034	0	0.003	0.2315	0.0003	0.0004	0.7576
s13128	0.0048	0.0022	0.0068	0.001	0.0124	0.0759	0.0039	0.0043	0.8887
s13622	0.0066	0.0026	0.0064	0.0002	0.0157	0.0737	0.0025	0.006	0.8863
s13295	0.0044	0.0021	0.0053	0	0.0147	0.0787	0.0037	0.0041	0.887
s13077	0.0078	0.0027	0.0095	0.0009	0.0243	0.1437	0.0057	0.0074	0.798
s13464	0.0068	0.0025	0.0084	0.0029	0.0154	0.097	0.0038	0.0048	0.8584
s13591	0.0063	0.0025	0.0073	0.002	0.0168	0.1111	0.0039	0.0026	0.8475
s13463	0.0086	0.0028	0.0062	0.0072	0.0201	0.125	0.0027	0.0044	0.823
s13103	0.0095	0.0026	0.0065	0.0103	0.0118	0.1071	0.002	0.004	0.8462
s13751	0.0049	0.0023	0.0069	0	0.0167	0.1833	0.0046	0.0064	0.7749
s13261	0.0071	0.002	0.0094	0.0002	0.0236	0.1201	0.0039	0.0065	0.8272
s13841	0.0086	0.0051	0.0117	0.0013	0.0194	0.4809	0.0062	0.0073	0.4595
s12885	0.0075	0.0024	0.0077	0.001	0.0238	0.5124	0.0027	0.0038	0.4387
s13510	0.0138	0.0032	0.0228	0.0015	0.0152	0.885	0.0039	0.0175	0.0371
s13282	0.0068	0.0021	0.0068	0.0003	0.0224	0.1209	0.005	0.0068	0.8289
s12866	0.0102	0.0032	0.0114	0.0002	0.0285	0.3272	0.0058	0.0061	0.6074
s13131	0.0065	0.002	0.0063	0.0002	0.0152	0.0932	0.0032	0.0052	0.8682
s13305	0.0078	0.003	0.0097	0	0.0262	0.1265	0.004	0.0045	0.8183
s13127	0.0058	0.0013	0.0063	0	0.0107	0.1019	0.0015	0.0015	0.871
s13590	0.0062	0.0032	0.0054	0.0001	0.0065	0.0259	0.0035	0.0047	0.9445
s13687	0.0041	0.0013	0.0038	0.0013	0.0062	0.1646	0.0018	0.0025	0.8144
s13129	0.0074	0.0037	0.0079	0.001	0.0183	0.1178	0.0036	0.0048	0.8355
s13623	0.0061	0.0014	0.0047	0.0001	0.0116	0.0555	0.0015	0.002	0.9171
s13382	0.0057	0.002	0.0107	0.0001	0.0163	0.7145	0.0053	0.0062	0.2392
s13385	0.0049	0.0028	0.0072	0.0021	0.0164	0.2927	0.0036	0.0047	0.6656
s13031	0.0084	0.0033	0.0115	0.0011	0.0196	0.2129	0.0027	0.0049	0.7356

## Sheet: Fig 4e
Body site	Anterior nares	Buccal mucosa	L_Retroauricular crease	Posterior fornix	R_Retroauricular crease	Stool	Supragingival plaque	Tongue dorsum	Unknown
Mean	0.00835286	0.00258286	0.00885	0.000797143	0.0182386	0.244819	0.00323429	0.00801143	0.705114
SE	0.000207696	0.000113808	0.000295947	0.000111585	0.000797445	0.0264426	0.000155731	0.000427655	0.0265144
SampleID	Anterior nares	Buccal mucosa	L_Retroauricular crease	Posterior fornix	R_Retroauricular crease	Stool	Supragingival plaque	Tongue dorsum	Unknown
s13790	0.0109	0.0032	0.0124	0.0001	0.0288	0.2928	0.004	0.0096	0.6382
s13383	0.0036	0.001	0.0031	0.0001	0.0039	0.2623	0.0006	0.0013	0.7241
s13352	0.0077	0.0008	0.0088	0.001	0.0127	0.8619	0.0009	0.0008	0.1054
s13384	0.0107	0.0025	0.0104	0.0016	0.0161	0.1995	0.0037	0.0095	0.746
s13077	0.0119	0.0048	0.0125	0	0.0153	0.1346	0.0033	0.0153	0.8023
s13295	0.0056	0.0012	0.0088	0.0001	0.0146	0.0669	0.0034	0.0061	0.8933
s13622	0.0072	0.0018	0.007	0.0001	0.0147	0.0739	0.0033	0.0056	0.8864
s13128	0.0062	0.0011	0.0067	0.0001	0.0107	0.0815	0.0023	0.0027	0.8887
s13463	0.0097	0.004	0.0118	0.0024	0.0239	0.1399	0.0062	0.0132	0.7889
s13591	0.0095	0.0027	0.0078	0	0.0191	0.1124	0.0025	0.0066	0.8394
s13464	0.0106	0.003	0.0045	0.001	0.0143	0.1041	0.0034	0.0085	0.8506
s13082	0.0083	0.0026	0.0067	0.001	0.0179	0.1693	0.004	0.0073	0.7829
s12883	0.0019	0.0003	0.0025	0	0.002	0.2902	0.0002	0	0.7029
s13601	0.0095	0.0015	0.009	0.001	0.0237	0.1631	0.0036	0.0083	0.7803
s12971	0.006	0.0026	0.0086	0.0001	0.0142	0.1724	0.0044	0.0095	0.7822
s13608	0.0105	0.003	0.008	0.0009	0.0208	0.1379	0.003	0.0131	0.8028
s13687	0.007	0.0018	0.0068	0	0.0059	0.175	0.0012	0.0035	0.7988
s13590	0.0064	0.0026	0.0083	0	0.007	0.0275	0.0034	0.0072	0.9376
s13127	0.0051	0.0019	0.0055	0	0.0113	0.1294	0.0027	0.0045	0.8396
s13623	0.0077	0.0022	0.0057	0	0.0111	0.0723	0.0028	0.0048	0.8934
s13129	0.0102	0.0027	0.0084	0.0001	0.0156	0.1424	0.003	0.0067	0.8109
s13385	0.0074	0.0026	0.0066	0.0031	0.0125	0.2581	0.0019	0.0078	0.7
s13382	0.0072	0.0025	0.0088	0	0.0212	0.735	0.0021	0.0079	0.2153
s13031	0.0093	0.0034	0.0122	0.0028	0.0283	0.2226	0.0041	0.0108	0.7065
s13751	0.0061	0.0047	0.009	0	0.0189	0.2168	0.0036	0.0104	0.7305
s13103	0.0081	0.0027	0.0048	0.0034	0.0127	0.0853	0.0032	0.0083	0.8715
s13510	0.0092	0.0034	0.0124	0	0.0165	0.8937	0.0024	0.009	0.0534
s12885	0.0085	0.0017	0.0102	0.001	0.0273	0.4962	0.0021	0.0054	0.4476
s13841	0.0086	0.0027	0.0116	0.0018	0.0241	0.5032	0.004	0.0113	0.4327
s13261	0.0091	0.0031	0.0084	0.0006	0.0186	0.1193	0.0037	0.0096	0.8276
s12866	0.0107	0.0035	0.0143	0.0001	0.0396	0.3448	0.0046	0.0122	0.5702
s13282	0.0108	0.003	0.0069	0.0018	0.0176	0.118	0.0041	0.0091	0.8287
s13305	0.0093	0.0019	0.0099	0.0002	0.0217	0.1286	0.003	0.0096	0.8158
s13131	0.008	0.0023	0.007	0	0.0135	0.1042	0.0024	0.0057	0.8569
s13445	0.0076	0.0026	0.0082	0.0001	0.0164	0.0851	0.0031	0.007	0.8699
s12974	0.0079	0.0018	0.0076	0.0001	0.0179	0.1468	0.0035	0.008	0.8064
s13262	0.0097	0.0032	0.0098	0.0017	0.0209	0.2315	0.0041	0.0108	0.7083
s12973	0.0088	0.0028	0.0091	0.0011	0.0159	0.1491	0.0026	0.0101	0.8005
s13526	0.0088	0.0033	0.0083	0.001	0.0198	0.1995	0.0053	0.0134	0.7406
s13308	0.0081	0.0011	0.01	0.0001	0.0144	0.2211	0.0009	0.0026	0.7417
s12865	0.0083	0.003	0.0126	0.0012	0.0207	0.1691	0.0046	0.0123	0.7682
s13477	0.0078	0.0028	0.0084	0.0011	0.0135	0.1427	0.002	0.0066	0.8151
s13760	0.0074	0.0023	0.0077	0.0009	0.0198	0.0519	0.0031	0.0077	0.8992
s13528	0.0076	0.0029	0.0072	0.0002	0.0189	0.1278	0.0041	0.0084	0.8229
s13470	0.008	0.0018	0.006	0.001	0.0148	0.1495	0.0032	0.0065	0.8092
s12934	0.0115	0.0046	0.0101	0.0021	0.0198	0.1112	0.0049	0.0108	0.825
s13306	0.0063	0.0014	0.0058	0.0001	0.0107	0.0832	0.0014	0.0036	0.8875
s12874	0.0091	0.0033	0.0095	0	0.019	0.4892	0.0044	0.0141	0.4514
s13180	0.0077	0.0033	0.0083	0	0.0219	0.1693	0.0043	0.0085	0.7767
s13208	0.0088	0.0041	0.0106	0.0009	0.035	0.3736	0.0066	0.0179	0.5425
s13529	0.0093	0.0035	0.0112	0.0009	0.0196	0.1783	0.0032	0.0084	0.7656
s13134	0.0085	0.0018	0.0096	0.0001	0.0211	0.1918	0.0027	0.0085	0.7559
s13133	0.0094	0.0023	0.0092	0	0.0203	0.118	0.0042	0.0075	0.8291
s13017	0.0061	0.0015	0.0043	0	0.005	0.8881	0.0012	0.0028	0.091
s13280	0.0082	0.0026	0.0085	0.0027	0.0172	0.1233	0.0037	0.0097	0.8241
s13512	0.0104	0.0019	0.0094	0.002	0.0223	0.8685	0.0017	0.0024	0.0814
s13838	0.008	0.0015	0.0122	0.0008	0.0345	0.7865	0.0014	0.0019	0.1532
s12972	0.0073	0.0029	0.0072	0	0.0149	0.0551	0.0028	0.0058	0.904
s13443	0.0076	0.0027	0.0072	0	0.0123	0.2374	0.0034	0.0081	0.7213
s13110	0.0079	0.0021	0.0099	0.001	0.0175	0.1164	0.0035	0.0083	0.8334
s13661	0.0091	0.0028	0.0103	0	0.0204	0.457	0.004	0.0053	0.4911
s13033	0.01	0.0034	0.0127	0.0023	0.0218	0.2485	0.0048	0.0125	0.684
s13614	0.0082	0.0015	0.0083	0	0.0191	0.1174	0.0032	0.0058	0.8365
s13275	0.0082	0.0024	0.009	0	0.0225	0.18	0.003	0.0075	0.7674
s13503	0.01	0.0047	0.0154	0.0027	0.024	0.1714	0.0064	0.0142	0.7512
s13380	0.0079	0.0034	0.0106	0.0019	0.0243	0.1535	0.004	0.0084	0.786
s13860	0.0099	0.0032	0.0102	0.0018	0.0223	0.2247	0.0028	0.0103	0.7148
s13531	0.0094	0.0037	0.0103	0.0018	0.0211	0.1533	0.0046	0.0093	0.7865
s12875	0.0084	0.0024	0.009	0.0018	0.0218	0.1567	0.0036	0.0106	0.7857
s13653	0.009	0.0014	0.0104	0	0.0192	0.7757	0.001	0.004	0.1793

## Sheet: Fig 4f
Body site	Anterior nares	Buccal mucosa	L_Retroauricular crease	Posterior fornix	R_Retroauricular crease	Stool	Supragingival plaque	Tongue dorsum	Unknown
Mean	0.0103271	0.00180857	0.0120571	0.135549	0.0185014	0.0238557	0.00170143	0.00160286	0.794597
SE	0.000509926	0.000301719	0.000407571	0.0184282	0.000532814	0.010509	0.000296449	0.000252097	0.0220857
SampleID	Anterior nares	Buccal mucosa	L_Retroauricular crease	Posterior fornix	R_Retroauricular crease	Stool	Supragingival plaque	Tongue dorsum	Unknown
s13031	0.0132	0.0034	0.0144	0.6239	0.0229	0.0012	0.0021	0.0015	0.3174
s13385	0.0067	0.0019	0.0094	0.03	0.0124	0.0005	0.0014	0.0008	0.9369
s13382	0.012	0.0017	0.0137	0.8777	0.0166	0.0005	0.0009	0.0016	0.0753
s13129	0.0111	0.0008	0.0114	0.2452	0.0227	0.0003	0.0012	0.0007	0.7066
s13623	0.0083	0.0009	0.0087	0.0726	0.0169	0.0008	0.0008	0.0013	0.8897
s13590	0.0106	0.0007	0.0093	0.0428	0.0179	0.0002	0.0007	0.0006	0.9172
s13687	0.0104	0.001	0.0134	0.1185	0.0204	0.0533	0.0009	0.0016	0.7805
s13127	0.0134	0.0017	0.0136	0.14	0.0152	0.0036	0.0016	0.001	0.8099
s13305	0.0107	0.0012	0.0111	0.1967	0.0206	0.0009	0.0019	0.0012	0.7557
s13131	0.0099	0.0012	0.0112	0.0512	0.0135	0.0025	0.0012	0.0013	0.908
s12866	0.0082	0.0011	0.014	0.0805	0.0204	0.0017	0.0013	0.001	0.8718
s13282	0.0082	0.0034	0.0074	0.0149	0.011	0.0009	0.0021	0.0027	0.9494
s13510	0.0296	0.012	0.0245	0.0971	0.0257	0.05	0.0069	0.0095	0.7447
s12885	0.01	0.0015	0.0109	0.1203	0.0214	0.0024	0.0011	0.001	0.8314
s13261	0.0093	0.0027	0.0133	0.0921	0.0221	0.0006	0.0025	0.0013	0.8561
s13841	0.024	0.0099	0.0259	0.0637	0.0233	0.0025	0.0113	0.0102	0.8292
s13103	0.0071	0.0008	0.0086	0.0217	0.0115	0.0013	0.0015	0.0012	0.9463
s13751	0.0084	0.0012	0.0115	0.0694	0.0174	0.0023	0.0008	0.0005	0.8885
s13463	0.0096	0.0011	0.0131	0.1664	0.0213	0.0005	0.001	0.0014	0.7856
s13464	0.0068	0.0008	0.007	0.0455	0.0188	0.0002	0.001	0.0009	0.919
s13591	0.008	0.0012	0.0081	0.0309	0.0155	0.0009	0.0013	0.0014	0.9327
s13295	0.0085	0.0011	0.0108	0.0225	0.0102	0.0015	0.0024	0.0017	0.9413
s13077	0.0082	0.0008	0.0094	0.0364	0.0162	0.0007	0.0003	0.0004	0.9276
s13128	0.0106	0.001	0.0141	0.3353	0.0247	0.0005	0.0009	0.0008	0.6121
s13622	0.0108	0.0007	0.0125	0.1475	0.024	0.0007	0.0004	0.0008	0.8026
s13352	0.0109	0.0014	0.0131	0.4359	0.0222	0.0007	0.0011	0.0008	0.5139
s13383	0.0102	0.0013	0.0096	0.0474	0.0186	0.4288	0.0004	0.0003	0.4834
s13384	0.0084	0.0014	0.0105	0.0807	0.0178	0.0022	0.0012	0.0019	0.8759
s13790	0.0117	0.001	0.0142	0.2393	0.0273	0.0053	0.0017	0.0018	0.6977
s13608	0.007	0.0005	0.0082	0.018	0.0123	0.001	0.0013	0.0006	0.9511
s13601	0.0118	0.0009	0.0117	0.0539	0.0147	0.0006	0.0016	0.0012	0.9036
s12883	0.0134	0.0013	0.0112	0.4433	0.0204	0.4338	0.0008	0.0004	0.0754
s13082	0.0091	0.0021	0.0121	0.0302	0.0134	0.0007	0.0026	0.0013	0.9285
s12971	0.0105	0.0025	0.0145	0.0357	0.0165	0.0003	0.0017	0.0018	0.9165
s13443	0.0066	0.0001	0.0059	0.0364	0.0104	0.0015	0.0005	0.0004	0.9382
s12972	0.0103	0.0002	0.0097	0.1173	0.0162	0.0008	0.0004	0.0008	0.8443
s13838	0.0137	0.0023	0.0146	0.2823	0.024	0.0007	0.0034	0.0026	0.6564
s13512	0.0103	0.001	0.0125	0.165	0.0173	0.0188	0.0013	0.0009	0.7729
s13280	0.0105	0.002	0.0107	0.0325	0.0135	0.0026	0.0016	0.0028	0.9238
s13134	0.0075	0.0012	0.0132	0.303	0.025	0.0026	0.0008	0.0004	0.6463
s13529	0.01	0.0013	0.0113	0.0953	0.0205	0.0016	0.0015	0.0016	0.8569
s13017	0.0108	0.0008	0.0129	0.0519	0.0232	0.4077	0.0011	0.0006	0.491
s13133	0.009	0.0011	0.0124	0.2356	0.0237	0.0015	0.0007	0.0014	0.7146
s13653	0.0311	0.0167	0.0221	0.028	0.0193	0.1701	0.0178	0.013	0.6819
s13860	0.009	0.0013	0.0129	0.1162	0.0203	0.0033	0.0011	0.0014	0.8345
s12875	0.0104	0.0017	0.0122	0.1078	0.0213	0.0023	0.0019	0.0017	0.8407
s13531	0.0082	0.0019	0.0099	0.0444	0.0175	0.0003	0.0009	0.0007	0.9162
s13380	0.0124	0.0019	0.0137	0.2847	0.0222	0.0005	0.0014	0.0011	0.6621
s13503	0.0083	0.0004	0.0151	0.2593	0.0236	0.0005	0.0003	0.0008	0.6917
s13614	0.0114	0.0022	0.0115	0.0836	0.0239	0.0013	0.0017	0.0022	0.8622
s13275	0.0083	0.0014	0.0104	0.0356	0.0143	0.0004	0.0014	0.0013	0.9269
s13110	0.0076	0.0007	0.01	0.0391	0.0128	0.001	0.0008	0.0005	0.9275
s13033	0.0094	0.003	0.0142	0.0408	0.022	0.0009	0.0033	0.003	0.9034
s13661	0.0075	0.0004	0.0105	0.0533	0.0177	0.0087	0.0007	0.0004	0.9008
s13760	0.0123	0.0013	0.0135	0.2226	0.0264	0.0023	0.0013	0.0013	0.719
s13477	0.0082	0.0016	0.0134	0.1081	0.0214	0.0004	0.0011	0.0018	0.844
s12934	0.0063	0.0004	0.0073	0.0277	0.0124	0.0003	0.0002	0.0006	0.9448
s13306	0.0115	0.0014	0.0137	0.0686	0.0202	0.0011	0.0015	0.0015	0.8805
s13470	0.0074	0.0013	0.0107	0.0288	0.0133	0.0047	0.0012	0.001	0.9316
s13528	0.01	0.0008	0.0139	0.4602	0.016	0.0025	0.0011	0.0012	0.4943
s13308	0.0104	0.0016	0.013	0.1048	0.0237	0.0063	0.0011	0.0004	0.8387
s13526	0.0096	0.0008	0.0114	0.0511	0.0141	0.001	0.0008	0.001	0.9102
s12865	0.0083	0.0009	0.0104	0.1149	0.0188	0.0026	0.0011	0.0012	0.8418
s13262	0.0075	0.0014	0.0133	0.0349	0.0189	0.0005	0.0005	0.0009	0.9221
s12974	0.0086	0.0008	0.0143	0.2776	0.0233	0.0013	0.0008	0.0004	0.6729
s12973	0.0104	0.0018	0.0146	0.2957	0.0169	0.0013	0.002	0.002	0.6553
s13445	0.0065	0.0001	0.0069	0.0373	0.0112	0.0016	0	0	0.9364
s13208	0.0081	0.001	0.0083	0.0275	0.0111	0.0028	0.0006	0.0011	0.9395
s12874	0.0107	0.0021	0.0106	0.046	0.0174	0.0044	0.0028	0.003	0.903
s13180	0.0082	0.0015	0.0106	0.0433	0.0155	0.0058	0.0005	0.0007	0.9139

## Sheet: Fig 4g
	DT	variable	value	fullData
1	ACC	auroc_likelyContam	0.999874	0.999969
2	BLCA	auroc_likelyContam	0.917862	0.925438
3	LGG	auroc_likelyContam	0.982808	0.989597
4	BRCA	auroc_likelyContam	0.950584	0.953934
5	CESC	auroc_likelyContam	0.980373	0.977747
6	CHOL	auroc_likelyContam	0.907078	0.823953
7	COAD	auroc_likelyContam	0.983317	0.989397
8	ESCA	auroc_likelyContam	0.990162	0.994793
9	GBM	auroc_likelyContam	0.995906	0.997152
10	HNSC	auroc_likelyContam	0.981284	0.982008
11	KICH	auroc_likelyContam	0.999345	0.998718
12	KIRC	auroc_likelyContam	0.991041	0.991566
13	KIRP	auroc_likelyContam	0.969759	0.977162
14	LIHC	auroc_likelyContam	0.9854	0.991301
15	LUAD	auroc_likelyContam	0.96278	0.9718
16	LUSC	auroc_likelyContam	0.958289	0.964708
17	DLBC	auroc_likelyContam	0.955928	0.87717
18	MESO	auroc_likelyContam	0.965424	0.958025
19	OV	auroc_likelyContam	0.993598	0.995648
20	PAAD	auroc_likelyContam	0.988783	0.982426
21	PCPG	auroc_likelyContam	0.981811	0.983152
22	PRAD	auroc_likelyContam	0.979282	0.980667
23	READ	auroc_likelyContam	0.996518	0.996716
24	SARC	auroc_likelyContam	0.989611	0.985298
25	SKCM	auroc_likelyContam	0.958616	0.959235
26	STAD	auroc_likelyContam	0.98748	0.987374
27	TGCT	auroc_likelyContam	0.988955	0.992683
28	THYM	auroc_likelyContam	0.978686	0.978188
29	THCA	auroc_likelyContam	0.963801	0.97212
30	UCS	auroc_likelyContam	0.992596	0.983489
31	UCEC	auroc_likelyContam	0.970919	0.97787
32	UVM	auroc_likelyContam	0.974912	0.989625
33	ACC	auroc_allPutative	0.999129	0.999969
34	BLCA	auroc_allPutative	0.907715	0.925438
35	LGG	auroc_allPutative	0.979689	0.989597
36	BRCA	auroc_allPutative	0.945738	0.953934
37	CESC	auroc_allPutative	0.96695	0.977747
38	CHOL	auroc_allPutative	0.926914	0.823953
39	COAD	auroc_allPutative	0.982602	0.989397
40	ESCA	auroc_allPutative	0.990136	0.994793
41	GBM	auroc_allPutative	0.997247	0.997152
42	HNSC	auroc_allPutative	0.97925	0.982008
43	KICH	auroc_allPutative	0.996624	0.998718
44	KIRC	auroc_allPutative	0.990825	0.991566
45	KIRP	auroc_allPutative	0.96506	0.977162
46	LIHC	auroc_allPutative	0.986714	0.991301
47	LUAD	auroc_allPutative	0.959431	0.9718
48	LUSC	auroc_allPutative	0.957302	0.964708
49	DLBC	auroc_allPutative	0.959574	0.87717
50	MESO	auroc_allPutative	0.960804	0.958025
51	OV	auroc_allPutative	0.994535	0.995648
52	PAAD	auroc_allPutative	0.983064	0.982426
53	PCPG	auroc_allPutative	0.982683	0.983152
54	PRAD	auroc_allPutative	0.978886	0.980667
55	READ	auroc_allPutative	0.995566	0.996716
56	SARC	auroc_allPutative	0.987556	0.985298
57	SKCM	auroc_allPutative	0.96731	0.959235
58	STAD	auroc_allPutative	0.986865	0.987374
59	TGCT	auroc_allPutative	0.986548	0.992683
60	THYM	auroc_allPutative	0.98419	0.978188
61	THCA	auroc_allPutative	0.961011	0.97212
62	UCS	auroc_allPutative	0.976993	0.983489
63	UCEC	auroc_allPutative	0.965891	0.97787
64	UVM	auroc_allPutative	0.979064	0.989625
65	ACC	auroc_plateCenter	0.99873	0.999969
66	BLCA	auroc_plateCenter	0.914238	0.925438
67	LGG	auroc_plateCenter	0.986175	0.989597
68	BRCA	auroc_plateCenter	0.959334	0.953934
69	CESC	auroc_plateCenter	0.975933	0.977747
70	CHOL	auroc_plateCenter	0.897111	0.823953
71	COAD	auroc_plateCenter	0.987901	0.989397
72	ESCA	auroc_plateCenter	0.984423	0.994793
73	GBM	auroc_plateCenter	0.995634	0.997152
74	HNSC	auroc_plateCenter	0.982055	0.982008
75	KICH	auroc_plateCenter	0.999359	0.998718
76	KIRC	auroc_plateCenter	0.991063	0.991566
77	KIRP	auroc_plateCenter	0.956275	0.977162
78	LIHC	auroc_plateCenter	0.984011	0.991301
79	LUAD	auroc_plateCenter	0.961843	0.9718
80	LUSC	auroc_plateCenter	0.959948	0.964708
81	DLBC	auroc_plateCenter	0.942894	0.87717
82	MESO	auroc_plateCenter	0.972692	0.958025
83	OV	auroc_plateCenter	0.995531	0.995648
84	PAAD	auroc_plateCenter	0.979269	0.982426
85	PCPG	auroc_plateCenter	0.974509	0.983152
86	PRAD	auroc_plateCenter	0.978368	0.980667
87	READ	auroc_plateCenter	0.997791	0.996716
88	SARC	auroc_plateCenter	0.986787	0.985298
89	SKCM	auroc_plateCenter	0.967707	0.959235
90	STAD	auroc_plateCenter	0.985472	0.987374
91	TGCT	auroc_plateCenter	0.993823	0.992683
92	THYM	auroc_plateCenter	0.979998	0.978188
93	THCA	auroc_plateCenter	0.964115	0.97212
94	UCS	auroc_plateCenter	0.989589	0.983489
95	UCEC	auroc_plateCenter	0.966483	0.97787
96	UVM	auroc_plateCenter	0.975845	0.989625
97	ACC	auroc_mostStringent	0.992703	0.999969
98	BLCA	auroc_mostStringent	0.954337	0.925438
99	LGG	auroc_mostStringent	0.989126	0.989597
100	BRCA	auroc_mostStringent	0.949262	0.953934
101	CESC	auroc_mostStringent	0.953951	0.977747
102	CHOL	auroc_mostStringent	0.914901	0.823953
103	COAD	auroc_mostStringent	0.970696	0.989397
104	ESCA	auroc_mostStringent	0.990006	0.994793
105	GBM	auroc_mostStringent	0.998763	0.997152
106	HNSC	auroc_mostStringent	0.96728	0.982008
107	KICH	auroc_mostStringent	0.997621	0.998718
108	KIRC	auroc_mostStringent	0.984449	0.991566
109	KIRP	auroc_mostStringent	0.963995	0.977162
110	LIHC	auroc_mostStringent	0.974723	0.991301
111	LUAD	auroc_mostStringent	0.955133	0.9718
112	LUSC	auroc_mostStringent	0.963591	0.964708
113	DLBC	auroc_mostStringent	0.995563	0.87717
114	MESO	auroc_mostStringent	0.992601	0.958025
115	OV	auroc_mostStringent	0.99751	0.995648
116	PAAD	auroc_mostStringent	0.952071	0.982426
117	PCPG	auroc_mostStringent	0.994924	0.983152
118	PRAD	auroc_mostStringent	0.97745	0.980667
119	READ	auroc_mostStringent	0.9555	0.996716
120	SARC	auroc_mostStringent	0.962881	0.985298
121	SKCM	auroc_mostStringent	0.975668	0.959235
122	STAD	auroc_mostStringent	0.995602	0.987374
123	TGCT	auroc_mostStringent	0.993232	0.992683
124	THYM	auroc_mostStringent	0.974342	0.978188
125	THCA	auroc_mostStringent	0.969894	0.97212
126	UCS	auroc_mostStringent	0.952496	0.983489
127	UCEC	auroc_mostStringent	0.988609	0.97787
128	UVM	auroc_mostStringent	0.99959	0.989625

## Sheet: Fig 4h
	DT	variable	value	fullData
1	ACC	aupr_likelyContam	0.977306	0.994518
2	BLCA	aupr_likelyContam	0.427412	0.474854
3	LGG	aupr_likelyContam	0.880321	0.90415
4	BRCA	aupr_likelyContam	0.78512	0.808679
5	CESC	aupr_likelyContam	0.798357	0.785353
6	CHOL	aupr_likelyContam	0.418733	0.459902
7	COAD	aupr_likelyContam	0.840259	0.890546
8	ESCA	aupr_likelyContam	0.869538	0.907193
9	GBM	aupr_likelyContam	0.95436	0.965169
10	HNSC	aupr_likelyContam	0.86292	0.879462
11	KICH	aupr_likelyContam	0.944051	0.940555
12	KIRC	aupr_likelyContam	0.948324	0.952374
13	KIRP	aupr_likelyContam	0.694979	0.734855
14	LIHC	aupr_likelyContam	0.886216	0.940399
15	LUAD	aupr_likelyContam	0.730393	0.737
16	LUSC	aupr_likelyContam	0.774115	0.76562
17	DLBC	aupr_likelyContam	0.401219	0.361838
18	MESO	aupr_likelyContam	0.696908	0.654108
19	OV	aupr_likelyContam	0.959763	0.966332
20	PAAD	aupr_likelyContam	0.795059	0.831206
21	PCPG	aupr_likelyContam	0.786804	0.733265
22	PRAD	aupr_likelyContam	0.862285	0.880002
23	READ	aupr_likelyContam	0.913149	0.930222
24	SARC	aupr_likelyContam	0.889991	0.880277
25	SKCM	aupr_likelyContam	0.618361	0.585531
26	STAD	aupr_likelyContam	0.910667	0.908962
27	TGCT	aupr_likelyContam	0.897127	0.911972
28	THYM	aupr_likelyContam	0.513279	0.610404
29	THCA	aupr_likelyContam	0.792623	0.813313
30	UCS	aupr_likelyContam	0.793774	0.802254
31	UCEC	aupr_likelyContam	0.873704	0.888403
32	UVM	aupr_likelyContam	0.805273	0.834692
33	ACC	aupr_allPutative	0.920159	0.994518
34	BLCA	aupr_allPutative	0.453374	0.474854
35	LGG	aupr_allPutative	0.857978	0.90415
36	BRCA	aupr_allPutative	0.782323	0.808679
37	CESC	aupr_allPutative	0.743737	0.785353
38	CHOL	aupr_allPutative	0.34604	0.459902
39	COAD	aupr_allPutative	0.833581	0.890546
40	ESCA	aupr_allPutative	0.875053	0.907193
41	GBM	aupr_allPutative	0.962336	0.965169
42	HNSC	aupr_allPutative	0.845676	0.879462
43	KICH	aupr_allPutative	0.910218	0.940555
44	KIRC	aupr_allPutative	0.948055	0.952374
45	KIRP	aupr_allPutative	0.651672	0.734855
46	LIHC	aupr_allPutative	0.905994	0.940399
47	LUAD	aupr_allPutative	0.680895	0.737
48	LUSC	aupr_allPutative	0.761106	0.76562
49	DLBC	aupr_allPutative	0.677521	0.361838
50	MESO	aupr_allPutative	0.552174	0.654108
51	OV	aupr_allPutative	0.955111	0.966332
52	PAAD	aupr_allPutative	0.771463	0.831206
53	PCPG	aupr_allPutative	0.790801	0.733265
54	PRAD	aupr_allPutative	0.850424	0.880002
55	READ	aupr_allPutative	0.907791	0.930222
56	SARC	aupr_allPutative	0.891294	0.880277
57	SKCM	aupr_allPutative	0.54984	0.585531
58	STAD	aupr_allPutative	0.904295	0.908962
59	TGCT	aupr_allPutative	0.889609	0.911972
60	THYM	aupr_allPutative	0.549225	0.610404
61	THCA	aupr_allPutative	0.768638	0.813313
62	UCS	aupr_allPutative	0.794061	0.802254
63	UCEC	aupr_allPutative	0.86566	0.888403
64	UVM	aupr_allPutative	0.813883	0.834692
65	ACC	aupr_plateCenter	0.899259	0.994518
66	BLCA	aupr_plateCenter	0.426771	0.474854
67	LGG	aupr_plateCenter	0.893821	0.90415
68	BRCA	aupr_plateCenter	0.81627	0.808679
69	CESC	aupr_plateCenter	0.794735	0.785353
70	CHOL	aupr_plateCenter	0.456689	0.459902
71	COAD	aupr_plateCenter	0.863894	0.890546
72	ESCA	aupr_plateCenter	0.877285	0.907193
73	GBM	aupr_plateCenter	0.939627	0.965169
74	HNSC	aupr_plateCenter	0.867479	0.879462
75	KICH	aupr_plateCenter	0.974394	0.940555
76	KIRC	aupr_plateCenter	0.945193	0.952374
77	KIRP	aupr_plateCenter	0.679321	0.734855
78	LIHC	aupr_plateCenter	0.886501	0.940399
79	LUAD	aupr_plateCenter	0.687175	0.737
80	LUSC	aupr_plateCenter	0.790554	0.76562
81	DLBC	aupr_plateCenter	0.458564	0.361838
82	MESO	aupr_plateCenter	0.675622	0.654108
83	OV	aupr_plateCenter	0.963065	0.966332
84	PAAD	aupr_plateCenter	0.747405	0.831206
85	PCPG	aupr_plateCenter	0.779803	0.733265
86	PRAD	aupr_plateCenter	0.874665	0.880002
87	READ	aupr_plateCenter	0.957164	0.930222
88	SARC	aupr_plateCenter	0.884213	0.880277
89	SKCM	aupr_plateCenter	0.535257	0.585531
90	STAD	aupr_plateCenter	0.901464	0.908962
91	TGCT	aupr_plateCenter	0.926833	0.911972
92	THYM	aupr_plateCenter	0.510779	0.610404
93	THCA	aupr_plateCenter	0.807864	0.813313
94	UCS	aupr_plateCenter	0.792284	0.802254
95	UCEC	aupr_plateCenter	0.857202	0.888403
96	UVM	aupr_plateCenter	0.844502	0.834692
97	ACC	aupr_mostStringent	0.895458	0.994518
98	BLCA	aupr_mostStringent	0.562087	0.474854
99	LGG	aupr_mostStringent	0.930085	0.90415
100	BRCA	aupr_mostStringent	0.740539	0.808679
101	CESC	aupr_mostStringent	0.637793	0.785353
102	CHOL	aupr_mostStringent	0.50306	0.459902
103	COAD	aupr_mostStringent	0.720017	0.890546
104	ESCA	aupr_mostStringent	0.818094	0.907193
105	GBM	aupr_mostStringent	0.983988	0.965169
106	HNSC	aupr_mostStringent	0.735081	0.879462
107	KICH	aupr_mostStringent	0.79371	0.940555
108	KIRC	aupr_mostStringent	0.866846	0.952374
109	KIRP	aupr_mostStringent	0.465657	0.734855
110	LIHC	aupr_mostStringent	0.754704	0.940399
111	LUAD	aupr_mostStringent	0.566856	0.737
112	LUSC	aupr_mostStringent	0.622137	0.76562
113	DLBC	aupr_mostStringent	0.692224	0.361838
114	MESO	aupr_mostStringent	0.587028	0.654108
115	OV	aupr_mostStringent	0.980853	0.966332
116	PAAD	aupr_mostStringent	0.376962	0.831206
117	PCPG	aupr_mostStringent	0.887425	0.733265
118	PRAD	aupr_mostStringent	0.76773	0.880002
119	READ	aupr_mostStringent	0.369133	0.930222
120	SARC	aupr_mostStringent	0.540604	0.880277
121	SKCM	aupr_mostStringent	0.341286	0.585531
122	STAD	aupr_mostStringent	0.933634	0.908962
123	TGCT	aupr_mostStringent	0.698066	0.911972
124	THYM	aupr_mostStringent	0.760219	0.610404
125	THCA	aupr_mostStringent	0.685099	0.813313
126	UCS	aupr_mostStringent	0.252524	0.802254
127	UCEC	aupr_mostStringent	0.93756	0.888403
128	UVM	aupr_mostStringent	0.976268	0.834692

## Sheet: Fig 4i
	DT	variable	value	fullData
1	BLCA	auroc_likelyContam	0.851155	0.874251
2	BRCA	auroc_likelyContam	0.97489	0.96574
3	COAD	auroc_likelyContam	0.939078	0.96337
4	ESCA	auroc_likelyContam	0.882424	0.867879
5	HNSC	auroc_likelyContam	0.838509	0.906832
6	KICH	auroc_likelyContam	0.979876	0.979876
7	KIRC	auroc_likelyContam	0.988254	0.986773
8	KIRP	auroc_likelyContam	0.895833	0.836458
9	LIHC	auroc_likelyContam	0.979647	0.983103
10	LUAD	auroc_likelyContam	0.85674	0.864461
11	LUSC	auroc_likelyContam	0.961439	0.963251
12	PRAD	auroc_likelyContam	0.907813	0.903385
13	STAD	auroc_likelyContam	0.945098	0.932145
14	THCA	auroc_likelyContam	0.823647	0.852263
15	UCEC	auroc_likelyContam	0.997114	0.994589
16	BLCA	auroc_allPutative	0.847305	0.874251
17	BRCA	auroc_allPutative	0.964818	0.96574
18	COAD	auroc_allPutative	0.956044	0.96337
19	ESCA	auroc_allPutative	0.740606	0.867879
20	HNSC	auroc_allPutative	0.853692	0.906832
21	KICH	auroc_allPutative	0.989164	0.979876
22	KIRC	auroc_allPutative	0.9847	0.986773
23	KIRP	auroc_allPutative	0.797917	0.836458
24	LIHC	auroc_allPutative	0.958525	0.983103
25	LUAD	auroc_allPutative	0.835172	0.864461
26	LUSC	auroc_allPutative	0.957816	0.963251
27	PRAD	auroc_allPutative	0.910156	0.903385
28	STAD	auroc_allPutative	0.919905	0.932145
29	THCA	auroc_allPutative	0.752662	0.852263
30	UCEC	auroc_allPutative	0.999278	0.994589
31	BLCA	auroc_plateCenter	0.837896	0.874251
32	BRCA	auroc_plateCenter	0.976734	0.96574
33	COAD	auroc_plateCenter	0.960478	0.96337
34	ESCA	auroc_plateCenter	0.830303	0.867879
35	HNSC	auroc_plateCenter	0.887049	0.906832
36	KICH	auroc_plateCenter	0.978328	0.979876
37	KIRC	auroc_plateCenter	0.975422	0.986773
38	KIRP	auroc_plateCenter	0.836458	0.836458
39	LIHC	auroc_plateCenter	0.963902	0.983103
40	LUAD	auroc_plateCenter	0.853799	0.864461
41	LUSC	auroc_plateCenter	0.968944	0.963251
42	PRAD	auroc_plateCenter	0.911198	0.903385
43	STAD	auroc_plateCenter	0.934878	0.932145
44	THCA	auroc_plateCenter	0.843611	0.852263
45	UCEC	auroc_plateCenter	0.953824	0.994589
46	BLCA	auroc_mostStringent	0.890077	0.874251
47	BRCA	auroc_mostStringent	0.98553	0.96574
48	COAD	auroc_mostStringent	1	0.96337
49	ESCA	auroc_mostStringent	0.910303	0.867879
50	HNSC	auroc_mostStringent	0.99793	0.906832
51	KICH	auroc_mostStringent	0.981424	0.979876
52	KIRC	auroc_mostStringent	0.936926	0.986773
53	KIRP	auroc_mostStringent	0.821875	0.836458
54	LIHC	auroc_mostStringent	0.965438	0.983103
55	LUAD	auroc_mostStringent	0.948529	0.864461
56	LUSC	auroc_mostStringent	0.895704	0.963251
57	PRAD	auroc_mostStringent	0.969792	0.903385
58	STAD	auroc_mostStringent	0.96732	0.932145
59	THCA	auroc_mostStringent	0.923469	0.852263
60	UCEC	auroc_mostStringent	0.949495	0.994589

## Sheet: Fig 4j
	DT	variable	value	fullData
1	BLCA	aupr_likelyContam	0.978237	0.986572
2	BRCA	aupr_likelyContam	0.997231	0.995026
3	COAD	aupr_likelyContam	0.994552	0.996879
4	ESCA	aupr_likelyContam	0.980113	0.978141
5	HNSC	aupr_likelyContam	0.975853	0.987102
6	KICH	aupr_likelyContam	0.987898	0.987621
7	KIRC	aupr_likelyContam	0.998719	0.998598
8	KIRP	aupr_likelyContam	0.985917	0.966786
9	LIHC	aupr_likelyContam	0.996554	0.997229
10	LUAD	aupr_likelyContam	0.96705	0.951188
11	LUSC	aupr_likelyContam	0.994334	0.994516
12	PRAD	aupr_likelyContam	0.989722	0.987634
13	STAD	aupr_likelyContam	0.991939	0.990367
14	THCA	aupr_likelyContam	0.963102	0.976444
15	UCEC	aupr_likelyContam	0.999916	0.999841
16	BLCA	aupr_allPutative	0.984043	0.986572
17	BRCA	aupr_allPutative	0.995454	0.995026
18	COAD	aupr_allPutative	0.996134	0.996879
19	ESCA	aupr_allPutative	0.954801	0.978141
20	HNSC	aupr_allPutative	0.971957	0.987102
21	KICH	aupr_allPutative	0.993834	0.987621
22	KIRC	aupr_allPutative	0.998333	0.998598
23	KIRP	aupr_allPutative	0.961838	0.966786
24	LIHC	aupr_allPutative	0.992695	0.997229
25	LUAD	aupr_allPutative	0.952597	0.951188
26	LUSC	aupr_allPutative	0.993691	0.994516
27	PRAD	aupr_allPutative	0.989245	0.987634
28	STAD	aupr_allPutative	0.987179	0.990367
29	THCA	aupr_allPutative	0.942804	0.976444
30	UCEC	aupr_allPutative	0.999979	0.999841
31	BLCA	aupr_plateCenter	0.98352	0.986572
32	BRCA	aupr_plateCenter	0.997355	0.995026
33	COAD	aupr_plateCenter	0.996539	0.996879
34	ESCA	aupr_plateCenter	0.969018	0.978141
35	HNSC	aupr_plateCenter	0.985219	0.987102
36	KICH	aupr_plateCenter	0.98642	0.987621
37	KIRC	aupr_plateCenter	0.99697	0.998598
38	KIRP	aupr_plateCenter	0.957867	0.966786
39	LIHC	aupr_plateCenter	0.993507	0.997229
40	LUAD	aupr_plateCenter	0.952622	0.951188
41	LUSC	aupr_plateCenter	0.995472	0.994516
42	PRAD	aupr_plateCenter	0.989991	0.987634
43	STAD	aupr_plateCenter	0.990547	0.990367
44	THCA	aupr_plateCenter	0.977082	0.976444
45	UCEC	aupr_plateCenter	0.998457	0.999841
46	BLCA	aupr_mostStringent	0.989601	0.986572
47	BRCA	aupr_mostStringent	0.998316	0.995026
48	COAD	aupr_mostStringent	1	0.996879
49	ESCA	aupr_mostStringent	0.983353	0.978141
50	HNSC	aupr_mostStringent	0.999792	0.987102
51	KICH	aupr_mostStringent	0.988099	0.987621
52	KIRC	aupr_mostStringent	0.992183	0.998598
53	KIRP	aupr_mostStringent	0.974816	0.966786
54	LIHC	aupr_mostStringent	0.993415	0.997229
55	LUAD	aupr_mostStringent	0.989798	0.951188
56	LUSC	aupr_mostStringent	0.982833	0.994516
57	PRAD	aupr_mostStringent	0.995444	0.987634
58	STAD	aupr_mostStringent	0.995529	0.990367
59	THCA	aupr_mostStringent	0.989727	0.976444
60	UCEC	aupr_mostStringent	0.998452	0.999841

## Sheet: Fig 4k
	DT	variable	value	fullData
1	BRCA	auroc_likelyContam	0.645503	0.539683
2	COAD	auroc_likelyContam	0.762032	0.804813
3	HNSC	auroc_likelyContam	0.600177	0.657546
4	KIRC	auroc_likelyContam	0.809542	0.884837
5	LUAD	auroc_likelyContam	0.574646	0.478732
6	READ	auroc_likelyContam	0.730159	0.75
7	STAD	auroc_likelyContam	0.920921	0.85986
8	THCA	auroc_likelyContam	0.600589	0.606061
9	BRCA	auroc_allPutative	0.513228	0.539683
10	COAD	auroc_allPutative	0.760027	0.804813
11	HNSC	auroc_allPutative	0.565755	0.657546
12	KIRC	auroc_allPutative	0.832288	0.884837
13	LUAD	auroc_allPutative	0.559633	0.478732
14	READ	auroc_allPutative	0.777778	0.75
15	STAD	auroc_allPutative	0.920921	0.85986
16	THCA	auroc_allPutative	0.503788	0.606061
17	BRCA	auroc_plateCenter	0.510582	0.539683
18	COAD	auroc_plateCenter	0.755348	0.804813
19	HNSC	auroc_plateCenter	0.680494	0.657546
20	KIRC	auroc_plateCenter	0.885621	0.884837
21	LUAD	auroc_plateCenter	0.503753	0.478732
22	READ	auroc_plateCenter	0.861111	0.75
23	STAD	auroc_plateCenter	0.893894	0.85986
24	THCA	auroc_plateCenter	0.513889	0.606061
25	BRCA	auroc_mostStringent	0.531746	0.539683
26	COAD	auroc_mostStringent	0.750668	0.804813
27	HNSC	auroc_mostStringent	0.585172	0.657546
28	KIRC	auroc_mostStringent	0.873725	0.884837
29	LUAD	auroc_mostStringent	0.578816	0.478732
30	READ	auroc_mostStringent	0.634921	0.75
31	STAD	auroc_mostStringent	0.924925	0.85986
32	THCA	auroc_mostStringent	0.561448	0.606061

[truncated: 1 more sheets: Fig 4l]
