# Supplementary material for: RETRACTED ARTICLE: Microbiome analyses of blood and tissues suggest cancerdiagnostic approach
Source: Springer Nature journal article supplement (doi:10.1038/s41586-020-2095-1), 2020-03-11
Supplement: 41586_2020_2095_MOESM13_ESM.xlsx [file 41586_2020_2095_MOESM13_ESM.xlsx]

## Sheet: EDF 6a
Disease Type	Full Data	Likely Contaminants Removed	Decontamination by Plate-Center Combination	All Putative Contaminants Removed	Most Stringent Filtering
ACC	1	1	1	1	1
BLCA	0.188627	0.194484	0.260702	0.331054	0.201503
LGG	0.179226	0.178384	0.181101	0.186643	0.129758
BRCA	0.103923	0.10357	0.12378	0.141637	0.123215
CESC	0.184127	0.177603	0.178455	0.175309	0.162266
CHOL	0.547037	0.498608	0.69205	0.693443	0.530581
COAD	0.151816	0.15377	0.142959	0.14062	0.139882
ESCA	0.424672	0.429261	0.456897	0.472572	0.616867
GBM	0.256707	0.25949	0.292839	0.328985	0.260064
HNSC	0.267428	0.263851	0.308295	0.33474	0.258493
KICH	0.336326	0.336439	0.341062	0.347572	0.325742
KIRC	0.0749396	0.0739655	0.104826	0.155562	0.105993
KIRP	0.221176	0.217361	0.261679	0.332483	0.3061
LIHC	0.208253	0.209542	0.237985	0.273586	0.211974
LUAD	0.141821	0.142207	0.158255	0.172185	0.142335
LUSC	0.0931694	0.0923342	0.10173	0.114147	0.0869186
DLBC	0.275689	0.268697	0.294746	0.394836	0.343852
MESO	1	1	1	1	1
OV	0.121049	0.123781	0.164657	0.189494	0.203779
PAAD	0.479323	0.477353	0.462124	0.463835	0.352577
PCPG	0.239799	0.199591	0.333616	0.334511	0.292448
PRAD	0.268493	0.266381	0.304681	0.344421	0.256284
READ	0.225524	0.232621	0.25342	0.282572	0.229076
SARC	0.135745	0.13524	0.153044	0.17508	0.112445
SKCM	0.0922552	0.0907656	0.149583	0.176002	0.114028
STAD	0.380073	0.393264	0.380761	0.400432	0.44559
TGCT	0.576587	0.548242	0.576094	0.577884	0.53038
THYM	0.793161	0.787165	0.763296	0.767309	0.50435
THCA	0.200479	0.199184	0.217482	0.215788	0.191266
UCS	1	1	1	1	1
UCEC	0.154867	0.152908	0.182356	0.19407	0.184218
UVM	0.611351	0.59133	0.700652	0.789206	0.551379

## Sheet: EDF 6b
Disease Type	Full Data	Likely Contaminants Removed	Decontamination by Plate-Center Combination	All Putative Contaminants Removed	Most Stringent Filtering
ACC	0	0	0	0	0
BLCA	0.323049	0.295233	0.281403	0.270607	0.304642
LGG	0	0	0	0	0
BRCA	0.102521	0.0951631	0.0980424	0.0977649	0.0780543
CESC	0.108476	0.117436	0.196247	0.229352	0.0934096
CHOL	0.452963	0.501392	0.30795	0.306557	0.469419
COAD	0.192683	0.193323	0.211752	0.199259	0.138447
ESCA	0.176539	0.170412	0.205604	0.204955	0.226716
GBM	0	0	0	0	0
HNSC	0.20555	0.206823	0.238416	0.245871	0.21551
KICH	0.24935	0.250093	0.247338	0.243753	0.233577
KIRC	0.234515	0.236013	0.272373	0.317359	0.233164
KIRP	0.0894576	0.0898526	0.0914413	0.0920544	0.0838903
LIHC	0.178119	0.183316	0.182387	0.167251	0.137449
LUAD	0.236189	0.237493	0.231412	0.228218	0.202801
LUSC	0.252721	0.251041	0.242103	0.222798	0.166281
DLBC	0	0	0	0	0
MESO	0	0	0	0	0
OV	0.31331	0.309993	0.297132	0.279075	0.271809
PAAD	0.359642	0.376245	0.406334	0.408052	0.359115
PCPG	0.13812	0.14364	0.33546	0.336949	0.230369
PRAD	0.203462	0.208091	0.202525	0.209404	0.186104
READ	0.15627	0.137371	0.155527	0.173759	0.14715
SARC	0.274376	0.270722	0.241368	0.213921	0.283862
SKCM	0.122287	0.128009	0.0695588	0.0921477	0.103313
STAD	0.413746	0.3964	0.476774	0.506414	0.489738
TGCT	0	0	0	0	0
THYM	0.206839	0.212835	0.236704	0.232691	0.49565
THCA	0.17253	0.171927	0.212019	0.229147	0.137515
UCS	0	0	0	0	0
UCEC	0.204065	0.199437	0.199602	0.196916	0.144808
UVM	0	0	0	0	0

## Sheet: EDF 6c
Disease Type	Full Data	Likely Contaminants Removed	Decontamination by Plate-Center Combination	All Putative Contaminants Removed	Most Stringent Filtering
ACC	0	0	0	0	0
BLCA	0.488323	0.510283	0.457895	0.398339	0.493855
LGG	0.601266	0.6092	0.522185	0.444379	0.44822
BRCA	0.561998	0.565926	0.551425	0.544546	0.569147
CESC	0.650371	0.653684	0.562099	0.521468	0.622163
CHOL	0	0	0	0	0
COAD	0.631232	0.628546	0.601238	0.603443	0.675574
ESCA	0.079713	0.0787064	0.084984	0.0797537	0.0353649
GBM	0.486786	0.482949	0.436906	0.403064	0.472005
HNSC	0.489778	0.491314	0.392681	0.332124	0.431609
KICH	0.414323	0.413468	0.4116	0.408675	0.440681
KIRC	0.681171	0.680582	0.603024	0.493987	0.621719
KIRP	0.67027	0.676683	0.616183	0.523434	0.567415
LIHC	0.570608	0.577359	0.554131	0.453442	0.399204
LUAD	0.597209	0.59543	0.566405	0.54012	0.592659
LUSC	0.65411	0.656625	0.656167	0.663055	0.7468
DLBC	0.724311	0.731303	0.705254	0.605164	0.656148
MESO	0	0	0	0	0
OV	0.415028	0.415956	0.356805	0.338117	0.348407
PAAD	0	0	0	0	0
PCPG	0	0	0	0	0
PRAD	0.452395	0.454876	0.371097	0.283658	0.421709
READ	0.599945	0.611265	0.550754	0.482497	0.557272
SARC	0.516603	0.515962	0.467414	0.392233	0.384282
SKCM	0.371662	0.360506	0.451721	0.37445	0.467863
STAD	0.206181	0.210336	0.142465	0.0931546	0.0646727
TGCT	0	0	0	0	0
THYM	0	0	0	0	0
THCA	0.482247	0.480264	0.399573	0.325503	0.503325
UCS	0	0	0	0	0
UCEC	0.618464	0.624995	0.574787	0.555477	0.602879
UVM	0.388649	0.40867	0.299348	0.210794	0.448621
