# Supplementary material for: RETRACTED ARTICLE: Microbiome analyses of blood and tissues suggest cancerdiagnostic approach
Source: Springer Nature journal article supplement (doi:10.1038/s41586-020-2095-1), 2020-03-11
Supplement: 41586_2020_2095_MOESM14_ESM.xlsx [file 41586_2020_2095_MOESM14_ESM.xlsx]

## Sheet: EFD 7a
	DT	variable	value
1	ACC	percentContam.likelyContam	0
2	BLCA	percentContam.likelyContam	0.18
3	LGG	percentContam.likelyContam	0.54
4	BRCA	percentContam.likelyContam	0
5	CESC	percentContam.likelyContam	0
6	CHOL	percentContam.likelyContam	0.21
7	COAD	percentContam.likelyContam	0.07
8	ESCA	percentContam.likelyContam	0.09
9	GBM	percentContam.likelyContam	0
10	HNSC	percentContam.likelyContam	0.1
11	KICH	percentContam.likelyContam	0.7
12	KIRC	percentContam.likelyContam	0
13	KIRP	percentContam.likelyContam	0.09
14	LIHC	percentContam.likelyContam	0
15	LUAD	percentContam.likelyContam	0.25
16	LUSC	percentContam.likelyContam	0
17	DLBC	percentContam.likelyContam	37.05
18	MESO	percentContam.likelyContam	8.98
19	OV	percentContam.likelyContam	0
20	PAAD	percentContam.likelyContam	2.19
21	PCPG	percentContam.likelyContam	0.08
22	PRAD	percentContam.likelyContam	1.99
23	READ	percentContam.likelyContam	0
24	SARC	percentContam.likelyContam	2.97
25	SKCM	percentContam.likelyContam	0
26	STAD	percentContam.likelyContam	2.75
27	TGCT	percentContam.likelyContam	0.19
28	THYM	percentContam.likelyContam	0
29	THCA	percentContam.likelyContam	0.68
30	UCS	percentContam.likelyContam	0
31	UCEC	percentContam.likelyContam	0.66
32	UVM	percentContam.likelyContam	0.05
33	ACC	percentContam.plateCenter	0
34	BLCA	percentContam.plateCenter	0
35	LGG	percentContam.plateCenter	0
36	BRCA	percentContam.plateCenter	0
37	CESC	percentContam.plateCenter	0
38	CHOL	percentContam.plateCenter	0
39	COAD	percentContam.plateCenter	0
40	ESCA	percentContam.plateCenter	0
41	GBM	percentContam.plateCenter	0
42	HNSC	percentContam.plateCenter	0
43	KICH	percentContam.plateCenter	0
44	KIRC	percentContam.plateCenter	0
45	KIRP	percentContam.plateCenter	0
46	LIHC	percentContam.plateCenter	0
47	LUAD	percentContam.plateCenter	0
48	LUSC	percentContam.plateCenter	0
49	DLBC	percentContam.plateCenter	0
50	MESO	percentContam.plateCenter	0
51	OV	percentContam.plateCenter	0
52	PAAD	percentContam.plateCenter	0
53	PCPG	percentContam.plateCenter	0
54	PRAD	percentContam.plateCenter	0
55	READ	percentContam.plateCenter	0
56	SARC	percentContam.plateCenter	0
57	SKCM	percentContam.plateCenter	0
58	STAD	percentContam.plateCenter	0
59	TGCT	percentContam.plateCenter	0
60	THYM	percentContam.plateCenter	0
61	THCA	percentContam.plateCenter	0
62	UCS	percentContam.plateCenter	0
63	UCEC	percentContam.plateCenter	0
64	UVM	percentContam.plateCenter	0
65	ACC	percentContam.allPutative	0
66	BLCA	percentContam.allPutative	0
67	LGG	percentContam.allPutative	0.75
68	BRCA	percentContam.allPutative	0
69	CESC	percentContam.allPutative	0
70	CHOL	percentContam.allPutative	0.11
71	COAD	percentContam.allPutative	0.08
72	ESCA	percentContam.allPutative	0.11
73	GBM	percentContam.allPutative	0
74	HNSC	percentContam.allPutative	0.08
75	KICH	percentContam.allPutative	0.82
76	KIRC	percentContam.allPutative	0
77	KIRP	percentContam.allPutative	0.12
78	LIHC	percentContam.allPutative	0
79	LUAD	percentContam.allPutative	0.11
80	LUSC	percentContam.allPutative	0
81	DLBC	percentContam.allPutative	37.35
82	MESO	percentContam.allPutative	8.55
83	OV	percentContam.allPutative	0
84	PAAD	percentContam.allPutative	0.95
85	PCPG	percentContam.allPutative	0.03
86	PRAD	percentContam.allPutative	3.63
87	READ	percentContam.allPutative	0
88	SARC	percentContam.allPutative	2.36
89	SKCM	percentContam.allPutative	0
90	STAD	percentContam.allPutative	1.92
91	TGCT	percentContam.allPutative	0
92	THYM	percentContam.allPutative	0
93	THCA	percentContam.allPutative	1.04
94	UCS	percentContam.allPutative	0
95	UCEC	percentContam.allPutative	1.12
96	UVM	percentContam.allPutative	0.01
97	ACC	percentContam.mostStringent	0.5
98	BLCA	percentContam.mostStringent	0.61
99	LGG	percentContam.mostStringent	1.13
100	BRCA	percentContam.mostStringent	0.12
101	CESC	percentContam.mostStringent	0.05
102	CHOL	percentContam.mostStringent	4.42
103	COAD	percentContam.mostStringent	1.38
104	ESCA	percentContam.mostStringent	0.09
105	GBM	percentContam.mostStringent	0
106	HNSC	percentContam.mostStringent	0.13
107	KICH	percentContam.mostStringent	2.11
108	KIRC	percentContam.mostStringent	0
109	KIRP	percentContam.mostStringent	0.46
110	LIHC	percentContam.mostStringent	0.66
111	LUAD	percentContam.mostStringent	0.96
112	LUSC	percentContam.mostStringent	0.68
113	DLBC	percentContam.mostStringent	30.86
114	MESO	percentContam.mostStringent	0.21
115	OV	percentContam.mostStringent	0.24
116	PAAD	percentContam.mostStringent	6.58
117	PCPG	percentContam.mostStringent	0.02
118	PRAD	percentContam.mostStringent	0.6
119	READ	percentContam.mostStringent	0.35
120	SARC	percentContam.mostStringent	0.18
121	SKCM	percentContam.mostStringent	1.62
122	STAD	percentContam.mostStringent	0.07
123	TGCT	percentContam.mostStringent	1.24
124	THYM	percentContam.mostStringent	0.42
125	THCA	percentContam.mostStringent	0.31
126	UCS	percentContam.mostStringent	2.58
127	UCEC	percentContam.mostStringent	1.16
128	UVM	percentContam.mostStringent	0

## Sheet: EDF 7b
	DT	variable	value
1	BLCA	percentContam.likelyContam	1.21
2	LGG	percentContam.likelyContam	0
3	BRCA	percentContam.likelyContam	0
4	CESC	percentContam.likelyContam	18.19
5	COAD	percentContam.likelyContam	0
6	ESCA	percentContam.likelyContam	1.39
7	GBM	percentContam.likelyContam	0
8	HNSC	percentContam.likelyContam	0.09
9	KIRP	percentContam.likelyContam	15.63
10	LIHC	percentContam.likelyContam	3.02
11	LUAD	percentContam.likelyContam	0
12	OV	percentContam.likelyContam	0
13	PRAD	percentContam.likelyContam	0
14	READ	percentContam.likelyContam	0
15	SARC	percentContam.likelyContam	0
16	SKCM	percentContam.likelyContam	0.86
17	STAD	percentContam.likelyContam	0
18	THCA	percentContam.likelyContam	0.88
19	UCEC	percentContam.likelyContam	0
20	UVM	percentContam.likelyContam	0
21	BLCA	percentContam.plateCenter	0
22	LGG	percentContam.plateCenter	0
23	BRCA	percentContam.plateCenter	0
24	CESC	percentContam.plateCenter	0
25	COAD	percentContam.plateCenter	0
26	ESCA	percentContam.plateCenter	0
27	GBM	percentContam.plateCenter	0
28	HNSC	percentContam.plateCenter	0
29	KIRP	percentContam.plateCenter	0
30	LIHC	percentContam.plateCenter	0
31	LUAD	percentContam.plateCenter	0
32	OV	percentContam.plateCenter	0
33	PRAD	percentContam.plateCenter	0
34	READ	percentContam.plateCenter	0
35	SARC	percentContam.plateCenter	0
36	SKCM	percentContam.plateCenter	0
37	STAD	percentContam.plateCenter	0
38	THCA	percentContam.plateCenter	0
39	UCEC	percentContam.plateCenter	0
40	UVM	percentContam.plateCenter	0
41	BLCA	percentContam.allPutative	1.32
42	LGG	percentContam.allPutative	0.03
43	BRCA	percentContam.allPutative	0
44	CESC	percentContam.allPutative	13.51
45	COAD	percentContam.allPutative	0
46	ESCA	percentContam.allPutative	1.38
47	GBM	percentContam.allPutative	0
48	HNSC	percentContam.allPutative	0
49	KIRP	percentContam.allPutative	6.91
50	LIHC	percentContam.allPutative	8.51
51	LUAD	percentContam.allPutative	0
52	OV	percentContam.allPutative	0
53	PRAD	percentContam.allPutative	0
54	READ	percentContam.allPutative	0
55	SARC	percentContam.allPutative	0
56	SKCM	percentContam.allPutative	0.75
57	STAD	percentContam.allPutative	0
58	THCA	percentContam.allPutative	0.13
59	UCEC	percentContam.allPutative	0
60	UVM	percentContam.allPutative	1.55
61	BLCA	percentContam.mostStringent	1.2
62	LGG	percentContam.mostStringent	0
63	BRCA	percentContam.mostStringent	1.22
64	CESC	percentContam.mostStringent	0
65	COAD	percentContam.mostStringent	0.87
66	ESCA	percentContam.mostStringent	0
67	GBM	percentContam.mostStringent	0
68	HNSC	percentContam.mostStringent	0
69	KIRP	percentContam.mostStringent	0
70	LIHC	percentContam.mostStringent	0
71	LUAD	percentContam.mostStringent	0.52
72	OV	percentContam.mostStringent	0.68
73	PRAD	percentContam.mostStringent	5.52
74	READ	percentContam.mostStringent	1.35
75	SARC	percentContam.mostStringent	5.51
76	SKCM	percentContam.mostStringent	2.12
77	STAD	percentContam.mostStringent	5.05
78	THCA	percentContam.mostStringent	0.48
79	UCEC	percentContam.mostStringent	1.27
80	UVM	percentContam.mostStringent	0.23
