# Supplementary material for: RETRACTED ARTICLE: Microbiome analyses of blood and tissues suggest cancerdiagnostic approach
Source: Springer Nature journal article supplement (doi:10.1038/s41586-020-2095-1), 2020-03-11
Supplement: 41586_2020_2095_MOESM15_ESM.xlsx [file 41586_2020_2095_MOESM15_ESM.xlsx]

## Sheet: EDF 8a
	dataset	variable	value	sampleSize
1	Kraken (HMS)	Log Loss	0.0575753	5
2	Kraken (HMS)	Log Loss	1.0301	5
3	Kraken (HMS)	Log Loss	0.718459	5
4	Kraken (HMS)	Log Loss	0.754442	5
5	Kraken (HMS)	Log Loss	1.4007	5
6	Kraken (HMS)	Log Loss	1.18197	5
7	Kraken (HMS)	Log Loss	1.12712	5
8	Kraken (HMS)	Log Loss	1.15592	5
9	Kraken (HMS)	Log Loss	0.800537	5
10	Kraken (HMS)	Log Loss	1.60189	5
11	Kraken (HMS)	Log Loss	0.308575	10
12	Kraken (HMS)	Log Loss	0.127875	10
13	Kraken (HMS)	Log Loss	0.393761	10
14	Kraken (HMS)	Log Loss	0.219494	10
15	Kraken (HMS)	Log Loss	0.16542	10
16	Kraken (HMS)	Log Loss	0.401026	10
17	Kraken (HMS)	Log Loss	0.302321	10
18	Kraken (HMS)	Log Loss	0.329738	10
19	Kraken (HMS)	Log Loss	0.379569	10
20	Kraken (HMS)	Log Loss	0.435394	10
21	Kraken (HMS)	Log Loss	0.12964	15
22	Kraken (HMS)	Log Loss	0.211591	15
23	Kraken (HMS)	Log Loss	0.207672	15
24	Kraken (HMS)	Log Loss	0.605469	15
25	Kraken (HMS)	Log Loss	0.212732	15
26	Kraken (HMS)	Log Loss	0.094249	15
27	Kraken (HMS)	Log Loss	0.290444	15
28	Kraken (HMS)	Log Loss	0.115635	15
29	Kraken (HMS)	Log Loss	0.232759	15
30	Kraken (HMS)	Log Loss	0.0576942	15
31	Kraken (HMS)	Log Loss	0.210175	20
32	Kraken (HMS)	Log Loss	0.247517	20
33	Kraken (HMS)	Log Loss	0.0718204	20
34	Kraken (HMS)	Log Loss	0.0616894	20
35	Kraken (HMS)	Log Loss	0.172619	20
36	Kraken (HMS)	Log Loss	0.0705116	20
37	Kraken (HMS)	Log Loss	0.155867	20
38	Kraken (HMS)	Log Loss	0.128218	20
39	Kraken (HMS)	Log Loss	0.136752	20
40	Kraken (HMS)	Log Loss	0.244071	20
41	Kraken (HMS)	Log Loss	0.113964	25
42	Kraken (HMS)	Log Loss	0.131608	25
43	Kraken (HMS)	Log Loss	0.077831	25
44	Kraken (HMS)	Log Loss	0.162971	25
45	Kraken (HMS)	Log Loss	0.178403	25
46	Kraken (HMS)	Log Loss	0.0618098	25
47	Kraken (HMS)	Log Loss	0.10579	25
48	Kraken (HMS)	Log Loss	0.0611796	25
49	Kraken (HMS)	Log Loss	0.116645	25
50	Kraken (HMS)	Log Loss	0.115139	25
51	Kraken (HMS)	Log Loss	0.0694173	30
52	Kraken (HMS)	Log Loss	0.108172	30
53	Kraken (HMS)	Log Loss	0.0682212	30
54	Kraken (HMS)	Log Loss	0.216669	30
55	Kraken (HMS)	Log Loss	0.104515	30
56	Kraken (HMS)	Log Loss	0.121174	30
57	Kraken (HMS)	Log Loss	0.140016	30
58	Kraken (HMS)	Log Loss	0.0534175	30
59	Kraken (HMS)	Log Loss	0.120851	30
60	Kraken (HMS)	Log Loss	0.0335209	30
61	Kraken (HMS)	Log Loss	0.0930438	35
62	Kraken (HMS)	Log Loss	0.050366	35
63	Kraken (HMS)	Log Loss	0.0827669	35
64	Kraken (HMS)	Log Loss	0.077603	35
65	Kraken (HMS)	Log Loss	0.0506712	35
66	Kraken (HMS)	Log Loss	0.0443469	35
67	Kraken (HMS)	Log Loss	0.0751717	35
68	Kraken (HMS)	Log Loss	0.0711258	35
69	Kraken (HMS)	Log Loss	0.0913132	35
70	Kraken (HMS)	Log Loss	0.0832154	35
71	Kraken (HMS)	Log Loss	0.0527949	40
72	Kraken (HMS)	Log Loss	0.0452622	40
73	Kraken (HMS)	Log Loss	0.0452998	40
74	Kraken (HMS)	Log Loss	0.0496101	40
75	Kraken (HMS)	Log Loss	0.0923938	40
76	Kraken (HMS)	Log Loss	0.0975877	40
77	Kraken (HMS)	Log Loss	0.074293	40
78	Kraken (HMS)	Log Loss	0.0691266	40
79	Kraken (HMS)	Log Loss	0.0175086	40
80	Kraken (HMS)	Log Loss	0.109212	40
81	Kraken (Broad)	Log Loss	0.955621	5
82	Kraken (Broad)	Log Loss	0.956491	5
83	Kraken (Broad)	Log Loss	0.787316	5
84	Kraken (Broad)	Log Loss	0.774418	5
85	Kraken (Broad)	Log Loss	0.273387	5
86	Kraken (Broad)	Log Loss	0.24719	5
87	Kraken (Broad)	Log Loss	0.112895	5
88	Kraken (Broad)	Log Loss	1.49572	5
89	Kraken (Broad)	Log Loss	1.02115	5
90	Kraken (Broad)	Log Loss	1.09622	5
91	Kraken (Broad)	Log Loss	0.20643	10
92	Kraken (Broad)	Log Loss	0.468024	10
93	Kraken (Broad)	Log Loss	0.168003	10
94	Kraken (Broad)	Log Loss	0.384471	10
95	Kraken (Broad)	Log Loss	0.461828	10
96	Kraken (Broad)	Log Loss	0.340755	10
97	Kraken (Broad)	Log Loss	0.0480336	10
98	Kraken (Broad)	Log Loss	0.177811	10
99	Kraken (Broad)	Log Loss	0.26203	10
100	Kraken (Broad)	Log Loss	0.127817	10
101	Kraken (Broad)	Log Loss	0.202173	15
102	Kraken (Broad)	Log Loss	0.137589	15
103	Kraken (Broad)	Log Loss	0.150048	15
104	Kraken (Broad)	Log Loss	0.290049	15
105	Kraken (Broad)	Log Loss	0.154218	15
106	Kraken (Broad)	Log Loss	0.163848	15
107	Kraken (Broad)	Log Loss	0.327873	15
108	Kraken (Broad)	Log Loss	0.167132	15
109	Kraken (Broad)	Log Loss	0.228129	15
110	Kraken (Broad)	Log Loss	0.13893	15
111	Kraken (Broad)	Log Loss	0.0608635	20
112	Kraken (Broad)	Log Loss	0.177515	20
113	Kraken (Broad)	Log Loss	0.211223	20
114	Kraken (Broad)	Log Loss	0.0848508	20
115	Kraken (Broad)	Log Loss	0.269498	20
116	Kraken (Broad)	Log Loss	0.0734699	20
117	Kraken (Broad)	Log Loss	0.0590027	20
118	Kraken (Broad)	Log Loss	0.22272	20
119	Kraken (Broad)	Log Loss	0.196622	20
120	Kraken (Broad)	Log Loss	0.263681	20
121	Kraken (Broad)	Log Loss	0.246977	25
122	Kraken (Broad)	Log Loss	0.252575	25
123	Kraken (Broad)	Log Loss	0.228308	25
124	Kraken (Broad)	Log Loss	0.216435	25
125	Kraken (Broad)	Log Loss	0.233748	25
126	Kraken (Broad)	Log Loss	0.213662	25
127	Kraken (Broad)	Log Loss	0.335714	25
128	Kraken (Broad)	Log Loss	0.152979	25
129	Kraken (Broad)	Log Loss	0.144622	25
130	Kraken (Broad)	Log Loss	0.218342	25
131	Kraken (Broad)	Log Loss	0.188674	30
132	Kraken (Broad)	Log Loss	0.102313	30
133	Kraken (Broad)	Log Loss	0.235333	30
134	Kraken (Broad)	Log Loss	0.30052	30
135	Kraken (Broad)	Log Loss	0.18272	30
136	Kraken (Broad)	Log Loss	0.138684	30
137	Kraken (Broad)	Log Loss	0.159174	30
138	Kraken (Broad)	Log Loss	0.158294	30
139	Kraken (Broad)	Log Loss	0.170395	30
140	Kraken (Broad)	Log Loss	0.0995823	30
141	Kraken (Broad)	Log Loss	0.210992	35
142	Kraken (Broad)	Log Loss	0.150805	35
143	Kraken (Broad)	Log Loss	0.218636	35
144	Kraken (Broad)	Log Loss	0.125063	35
145	Kraken (Broad)	Log Loss	0.180712	35
146	Kraken (Broad)	Log Loss	0.191523	35
147	Kraken (Broad)	Log Loss	0.298352	35
148	Kraken (Broad)	Log Loss	0.129863	35
149	Kraken (Broad)	Log Loss	0.124933	35
150	Kraken (Broad)	Log Loss	0.163415	35
151	Kraken (Broad)	Log Loss	0.164902	40
152	Kraken (Broad)	Log Loss	0.236562	40
153	Kraken (Broad)	Log Loss	0.113587	40
154	Kraken (Broad)	Log Loss	0.197351	40
155	Kraken (Broad)	Log Loss	0.161497	40
156	Kraken (Broad)	Log Loss	0.139138	40
157	Kraken (Broad)	Log Loss	0.17961	40
158	Kraken (Broad)	Log Loss	0.218191	40
159	Kraken (Broad)	Log Loss	0.197461	40
160	Kraken (Broad)	Log Loss	0.207395	40
161	Shogun (HMS)	Log Loss	0.653256	5
162	Shogun (HMS)	Log Loss	1.62321	5
163	Shogun (HMS)	Log Loss	0.124073	5
164	Shogun (HMS)	Log Loss	0.720648	5
165	Shogun (HMS)	Log Loss	1.54353	5
166	Shogun (HMS)	Log Loss	0.42533	5
167	Shogun (HMS)	Log Loss	1.16894	5
168	Shogun (HMS)	Log Loss	0.311649	5
169	Shogun (HMS)	Log Loss	0.302074	5
170	Shogun (HMS)	Log Loss	0.949825	5
171	Shogun (HMS)	Log Loss	0.46557	10
172	Shogun (HMS)	Log Loss	0.308067	10
173	Shogun (HMS)	Log Loss	0.113445	10
174	Shogun (HMS)	Log Loss	0.200499	10
175	Shogun (HMS)	Log Loss	0.367694	10
176	Shogun (HMS)	Log Loss	0.299503	10
177	Shogun (HMS)	Log Loss	0.388878	10
178	Shogun (HMS)	Log Loss	0.963532	10
179	Shogun (HMS)	Log Loss	0.271922	10
180	Shogun (HMS)	Log Loss	0.250246	10
181	Shogun (HMS)	Log Loss	0.339593	15
182	Shogun (HMS)	Log Loss	0.388347	15
183	Shogun (HMS)	Log Loss	0.627554	15
184	Shogun (HMS)	Log Loss	0.550845	15
185	Shogun (HMS)	Log Loss	0.503155	15
186	Shogun (HMS)	Log Loss	0.169354	15
187	Shogun (HMS)	Log Loss	0.384496	15
188	Shogun (HMS)	Log Loss	0.198983	15
189	Shogun (HMS)	Log Loss	0.470707	15
190	Shogun (HMS)	Log Loss	0.466225	15
191	Shogun (HMS)	Log Loss	0.301066	20
192	Shogun (HMS)	Log Loss	0.270288	20
193	Shogun (HMS)	Log Loss	0.0743606	20
194	Shogun (HMS)	Log Loss	0.209399	20
195	Shogun (HMS)	Log Loss	0.101293	20
196	Shogun (HMS)	Log Loss	0.242148	20
197	Shogun (HMS)	Log Loss	0.435335	20
198	Shogun (HMS)	Log Loss	0.209188	20
199	Shogun (HMS)	Log Loss	0.0759192	20
200	Shogun (HMS)	Log Loss	0.242179	20
201	Shogun (HMS)	Log Loss	0.115734	25
202	Shogun (HMS)	Log Loss	0.168699	25
203	Shogun (HMS)	Log Loss	0.10952	25
204	Shogun (HMS)	Log Loss	0.0855774	25
205	Shogun (HMS)	Log Loss	0.138474	25
206	Shogun (HMS)	Log Loss	0.130772	25
207	Shogun (HMS)	Log Loss	0.244448	25
208	Shogun (HMS)	Log Loss	0.181272	25
209	Shogun (HMS)	Log Loss	0.104918	25
210	Shogun (HMS)	Log Loss	0.232751	25
211	Shogun (HMS)	Log Loss	0.0527496	30
212	Shogun (HMS)	Log Loss	0.113763	30
213	Shogun (HMS)	Log Loss	0.164532	30
214	Shogun (HMS)	Log Loss	0.104655	30
215	Shogun (HMS)	Log Loss	0.102873	30
216	Shogun (HMS)	Log Loss	0.0793811	30
217	Shogun (HMS)	Log Loss	0.242166	30
218	Shogun (HMS)	Log Loss	0.190892	30
219	Shogun (HMS)	Log Loss	0.117179	30
220	Shogun (HMS)	Log Loss	0.136655	30
221	Shogun (HMS)	Log Loss	0.0718283	35
222	Shogun (HMS)	Log Loss	0.151396	35
223	Shogun (HMS)	Log Loss	0.11868	35
224	Shogun (HMS)	Log Loss	0.0797259	35
225	Shogun (HMS)	Log Loss	0.129822	35
226	Shogun (HMS)	Log Loss	0.0758873	35
227	Shogun (HMS)	Log Loss	0.113025	35
228	Shogun (HMS)	Log Loss	0.0941395	35
229	Shogun (HMS)	Log Loss	0.0729048	35
230	Shogun (HMS)	Log Loss	0.132406	35
231	Shogun (HMS)	Log Loss	0.0458589	40
232	Shogun (HMS)	Log Loss	0.122168	40
233	Shogun (HMS)	Log Loss	0.134673	40
234	Shogun (HMS)	Log Loss	0.0614777	40
235	Shogun (HMS)	Log Loss	0.0610054	40
236	Shogun (HMS)	Log Loss	0.0912256	40
237	Shogun (HMS)	Log Loss	0.068634	40
238	Shogun (HMS)	Log Loss	0.150798	40
239	Shogun (HMS)	Log Loss	0.0925823	40
240	Shogun (HMS)	Log Loss	0.116986	40
241	Shogun (Broad)	Log Loss	0.415169	5
242	Shogun (Broad)	Log Loss	1.27943	5
243	Shogun (Broad)	Log Loss	0.463365	5
244	Shogun (Broad)	Log Loss	1.18261	5
245	Shogun (Broad)	Log Loss	1.41254	5
246	Shogun (Broad)	Log Loss	0.647939	5
247	Shogun (Broad)	Log Loss	1.00814	5
248	Shogun (Broad)	Log Loss	1.16524	5
249	Shogun (Broad)	Log Loss	1.62135	5
250	Shogun (Broad)	Log Loss	1.3701	5
251	Shogun (Broad)	Log Loss	0.6811	10
252	Shogun (Broad)	Log Loss	1.08705	10
253	Shogun (Broad)	Log Loss	0.835856	10
254	Shogun (Broad)	Log Loss	0.696278	10
255	Shogun (Broad)	Log Loss	0.368432	10
256	Shogun (Broad)	Log Loss	0.612378	10
257	Shogun (Broad)	Log Loss	0.720337	10
258	Shogun (Broad)	Log Loss	0.650999	10
259	Shogun (Broad)	Log Loss	0.8564	10
260	Shogun (Broad)	Log Loss	0.859892	10
261	Shogun (Broad)	Log Loss	0.460166	15
262	Shogun (Broad)	Log Loss	0.553098	15
263	Shogun (Broad)	Log Loss	0.416563	15
264	Shogun (Broad)	Log Loss	0.458643	15
265	Shogun (Broad)	Log Loss	0.398715	15
266	Shogun (Broad)	Log Loss	0.647345	15
267	Shogun (Broad)	Log Loss	0.662543	15
268	Shogun (Broad)	Log Loss	0.255711	15
269	Shogun (Broad)	Log Loss	0.486131	15
270	Shogun (Broad)	Log Loss	0.416627	15
271	Shogun (Broad)	Log Loss	0.355639	20
272	Shogun (Broad)	Log Loss	0.312517	20
273	Shogun (Broad)	Log Loss	0.183802	20
274	Shogun (Broad)	Log Loss	0.271008	20
275	Shogun (Broad)	Log Loss	0.291035	20
276	Shogun (Broad)	Log Loss	0.377784	20
277	Shogun (Broad)	Log Loss	0.274744	20
278	Shogun (Broad)	Log Loss	0.508371	20
279	Shogun (Broad)	Log Loss	0.163319	20
280	Shogun (Broad)	Log Loss	0.416547	20
281	Shogun (Broad)	Log Loss	0.23122	25
282	Shogun (Broad)	Log Loss	0.31568	25
283	Shogun (Broad)	Log Loss	0.320593	25
284	Shogun (Broad)	Log Loss	0.449315	25
285	Shogun (Broad)	Log Loss	0.300816	25
286	Shogun (Broad)	Log Loss	0.301302	25
287	Shogun (Broad)	Log Loss	0.297273	25
288	Shogun (Broad)	Log Loss	0.46137	25
289	Shogun (Broad)	Log Loss	0.355673	25
290	Shogun (Broad)	Log Loss	0.295062	25
291	Shogun (Broad)	Log Loss	0.460446	30
292	Shogun (Broad)	Log Loss	0.311004	30
293	Shogun (Broad)	Log Loss	0.448184	30
294	Shogun (Broad)	Log Loss	0.311229	30
295	Shogun (Broad)	Log Loss	0.354491	30
296	Shogun (Broad)	Log Loss	0.328845	30
297	Shogun (Broad)	Log Loss	0.2676	30
298	Shogun (Broad)	Log Loss	0.397595	30
299	Shogun (Broad)	Log Loss	0.271722	30
300	Shogun (Broad)	Log Loss	0.215705	30
301	Shogun (Broad)	Log Loss	0.244601	35
302	Shogun (Broad)	Log Loss	0.256141	35
303	Shogun (Broad)	Log Loss	0.222116	35
304	Shogun (Broad)	Log Loss	0.29235	35
305	Shogun (Broad)	Log Loss	0.404168	35
306	Shogun (Broad)	Log Loss	0.331894	35
307	Shogun (Broad)	Log Loss	0.323397	35
308	Shogun (Broad)	Log Loss	0.271102	35
309	Shogun (Broad)	Log Loss	0.307295	35
310	Shogun (Broad)	Log Loss	0.300213	35
311	Shogun (Broad)	Log Loss	0.209685	40
312	Shogun (Broad)	Log Loss	0.256843	40
313	Shogun (Broad)	Log Loss	0.256041	40
314	Shogun (Broad)	Log Loss	0.219403	40
315	Shogun (Broad)	Log Loss	0.284396	40
316	Shogun (Broad)	Log Loss	0.239375	40
317	Shogun (Broad)	Log Loss	0.271963	40
318	Shogun (Broad)	Log Loss	0.221664	40
319	Shogun (Broad)	Log Loss	0.339107	40
320	Shogun (Broad)	Log Loss	0.235976	40
321	Kraken (HMS)	Mean AUROC	1	5
322	Kraken (HMS)	Mean AUROC	0.833333	5
323	Kraken (HMS)	Mean AUROC	0.846667	5
324	Kraken (HMS)	Mean AUROC	0.893333	5
325	Kraken (HMS)	Mean AUROC	0.713333	5
326	Kraken (HMS)	Mean AUROC	0.72	5
327	Kraken (HMS)	Mean AUROC	0.753333	5
328	Kraken (HMS)	Mean AUROC	0.933333	5
329	Kraken (HMS)	Mean AUROC	0.833333	5
330	Kraken (HMS)	Mean AUROC	0.733333	5
331	Kraken (HMS)	Mean AUROC	0.975	10
332	Kraken (HMS)	Mean AUROC	0.996667	10
333	Kraken (HMS)	Mean AUROC	0.978333	10
334	Kraken (HMS)	Mean AUROC	0.99	10
335	Kraken (HMS)	Mean AUROC	0.99	10
336	Kraken (HMS)	Mean AUROC	0.975	10
337	Kraken (HMS)	Mean AUROC	0.983333	10
338	Kraken (HMS)	Mean AUROC	0.965	10
339	Kraken (HMS)	Mean AUROC	0.971667	10
340	Kraken (HMS)	Mean AUROC	0.973333	10
341	Kraken (HMS)	Mean AUROC	0.993333	15
342	Kraken (HMS)	Mean AUROC	0.985185	15
343	Kraken (HMS)	Mean AUROC	0.991111	15
344	Kraken (HMS)	Mean AUROC	0.954074	15
345	Kraken (HMS)	Mean AUROC	0.982222	15
346	Kraken (HMS)	Mean AUROC	1	15
347	Kraken (HMS)	Mean AUROC	0.985926	15
348	Kraken (HMS)	Mean AUROC	0.997037	15
349	Kraken (HMS)	Mean AUROC	0.983704	15
350	Kraken (HMS)	Mean AUROC	1	15
351	Kraken (HMS)	Mean AUROC	0.989583	20
352	Kraken (HMS)	Mean AUROC	0.982083	20
353	Kraken (HMS)	Mean AUROC	0.999167	20
354	Kraken (HMS)	Mean AUROC	0.999583	20
355	Kraken (HMS)	Mean AUROC	0.993333	20
356	Kraken (HMS)	Mean AUROC	0.999167	20
357	Kraken (HMS)	Mean AUROC	0.9925	20
358	Kraken (HMS)	Mean AUROC	0.991667	20
359	Kraken (HMS)	Mean AUROC	0.996667	20
360	Kraken (HMS)	Mean AUROC	0.986667	20
361	Kraken (HMS)	Mean AUROC	0.992267	25
362	Kraken (HMS)	Mean AUROC	0.9936	25
363	Kraken (HMS)	Mean AUROC	0.999733	25
364	Kraken (HMS)	Mean AUROC	0.994933	25
365	Kraken (HMS)	Mean AUROC	0.990133	25
366	Kraken (HMS)	Mean AUROC	0.9992	25
367	Kraken (HMS)	Mean AUROC	0.997333	25
368	Kraken (HMS)	Mean AUROC	0.998933	25
369	Kraken (HMS)	Mean AUROC	0.996	25
370	Kraken (HMS)	Mean AUROC	0.994667	25
371	Kraken (HMS)	Mean AUROC	0.999074	30
372	Kraken (HMS)	Mean AUROC	0.997407	30
373	Kraken (HMS)	Mean AUROC	0.998519	30
374	Kraken (HMS)	Mean AUROC	0.985741	30
375	Kraken (HMS)	Mean AUROC	0.997407	30
376	Kraken (HMS)	Mean AUROC	0.996296	30
377	Kraken (HMS)	Mean AUROC	0.993519	30
378	Kraken (HMS)	Mean AUROC	0.999074	30
379	Kraken (HMS)	Mean AUROC	0.996667	30
380	Kraken (HMS)	Mean AUROC	1	30
381	Kraken (HMS)	Mean AUROC	0.997007	35
382	Kraken (HMS)	Mean AUROC	0.998776	35
383	Kraken (HMS)	Mean AUROC	0.998503	35
384	Kraken (HMS)	Mean AUROC	0.997823	35
385	Kraken (HMS)	Mean AUROC	0.998503	35
386	Kraken (HMS)	Mean AUROC	0.999864	35
387	Kraken (HMS)	Mean AUROC	0.998639	35
388	Kraken (HMS)	Mean AUROC	0.998231	35
389	Kraken (HMS)	Mean AUROC	0.998095	35
390	Kraken (HMS)	Mean AUROC	0.997551	35
391	Kraken (HMS)	Mean AUROC	0.999479	40
392	Kraken (HMS)	Mean AUROC	0.999479	40
393	Kraken (HMS)	Mean AUROC	0.999687	40
394	Kraken (HMS)	Mean AUROC	0.999271	40
395	Kraken (HMS)	Mean AUROC	0.9975	40
396	Kraken (HMS)	Mean AUROC	0.996979	40
397	Kraken (HMS)	Mean AUROC	0.998021	40
398	Kraken (HMS)	Mean AUROC	0.998229	40
399	Kraken (HMS)	Mean AUROC	1	40
400	Kraken (HMS)	Mean AUROC	0.994062	40
401	Kraken (Broad)	Mean AUROC	0.84	5
402	Kraken (Broad)	Mean AUROC	0.806667	5
403	Kraken (Broad)	Mean AUROC	0.8	5
404	Kraken (Broad)	Mean AUROC	0.84	5
405	Kraken (Broad)	Mean AUROC	0.98	5
406	Kraken (Broad)	Mean AUROC	0.973333	5
407	Kraken (Broad)	Mean AUROC	1	5
408	Kraken (Broad)	Mean AUROC	0.82	5
409	Kraken (Broad)	Mean AUROC	0.813333	5
410	Kraken (Broad)	Mean AUROC	0.76	5
411	Kraken (Broad)	Mean AUROC	0.988333	10
412	Kraken (Broad)	Mean AUROC	0.946667	10
413	Kraken (Broad)	Mean AUROC	0.99	10
414	Kraken (Broad)	Mean AUROC	0.976667	10
415	Kraken (Broad)	Mean AUROC	0.946667	10
416	Kraken (Broad)	Mean AUROC	0.96	10
417	Kraken (Broad)	Mean AUROC	1	10
418	Kraken (Broad)	Mean AUROC	0.998333	10
419	Kraken (Broad)	Mean AUROC	0.985	10
420	Kraken (Broad)	Mean AUROC	0.996667	10
421	Kraken (Broad)	Mean AUROC	0.98963	15
422	Kraken (Broad)	Mean AUROC	0.994815	15
423	Kraken (Broad)	Mean AUROC	0.994815	15
424	Kraken (Broad)	Mean AUROC	0.975556	15
425	Kraken (Broad)	Mean AUROC	0.994074	15
426	Kraken (Broad)	Mean AUROC	0.991111	15
427	Kraken (Broad)	Mean AUROC	0.97037	15
428	Kraken (Broad)	Mean AUROC	0.98963	15
429	Kraken (Broad)	Mean AUROC	0.987407	15
430	Kraken (Broad)	Mean AUROC	0.997037	15
431	Kraken (Broad)	Mean AUROC	0.99955	20
432	Kraken (Broad)	Mean AUROC	0.990673	20
433	Kraken (Broad)	Mean AUROC	0.989772	20
434	Kraken (Broad)	Mean AUROC	0.998569	20
435	Kraken (Broad)	Mean AUROC	0.981426	20
436	Kraken (Broad)	Mean AUROC	0.99955	20
437	Kraken (Broad)	Mean AUROC	0.999059	20
438	Kraken (Broad)	Mean AUROC	0.989202	20
439	Kraken (Broad)	Mean AUROC	0.991574	20
440	Kraken (Broad)	Mean AUROC	0.980233	20
441	Kraken (Broad)	Mean AUROC	0.985191	25
442	Kraken (Broad)	Mean AUROC	0.984463	25
443	Kraken (Broad)	Mean AUROC	0.993445	25
444	Kraken (Broad)	Mean AUROC	0.990271	25
445	Kraken (Broad)	Mean AUROC	0.991242	25
446	Kraken (Broad)	Mean AUROC	0.989711	25
447	Kraken (Broad)	Mean AUROC	0.975593	25
448	Kraken (Broad)	Mean AUROC	0.994323	25
449	Kraken (Broad)	Mean AUROC	0.995275	25
450	Kraken (Broad)	Mean AUROC	0.994566	25
451	Kraken (Broad)	Mean AUROC	0.991239	30
452	Kraken (Broad)	Mean AUROC	0.998401	30
453	Kraken (Broad)	Mean AUROC	0.988951	30
454	Kraken (Broad)	Mean AUROC	0.987311	30
455	Kraken (Broad)	Mean AUROC	0.991566	30
456	Kraken (Broad)	Mean AUROC	0.997803	30
457	Kraken (Broad)	Mean AUROC	0.993478	30
458	Kraken (Broad)	Mean AUROC	0.994604	30
459	Kraken (Broad)	Mean AUROC	0.991037	30
460	Kraken (Broad)	Mean AUROC	0.99742	30
461	Kraken (Broad)	Mean AUROC	0.990778	35
462	Kraken (Broad)	Mean AUROC	0.995744	35
463	Kraken (Broad)	Mean AUROC	0.98691	35
464	Kraken (Broad)	Mean AUROC	0.996402	35
465	Kraken (Broad)	Mean AUROC	0.993633	35
466	Kraken (Broad)	Mean AUROC	0.992642	35
467	Kraken (Broad)	Mean AUROC	0.981911	35
468	Kraken (Broad)	Mean AUROC	0.994344	35
469	Kraken (Broad)	Mean AUROC	0.995852	35
470	Kraken (Broad)	Mean AUROC	0.993719	35
471	Kraken (Broad)	Mean AUROC	0.992763	40
472	Kraken (Broad)	Mean AUROC	0.981274	40
473	Kraken (Broad)	Mean AUROC	0.996582	40
474	Kraken (Broad)	Mean AUROC	0.993507	40
475	Kraken (Broad)	Mean AUROC	0.992965	40
476	Kraken (Broad)	Mean AUROC	0.995016	40
477	Kraken (Broad)	Mean AUROC	0.992522	40
478	Kraken (Broad)	Mean AUROC	0.988842	40
479	Kraken (Broad)	Mean AUROC	0.989138	40
480	Kraken (Broad)	Mean AUROC	0.978092	40
481	Shogun (HMS)	Mean AUROC	0.933333	5
482	Shogun (HMS)	Mean AUROC	0.806667	5
483	Shogun (HMS)	Mean AUROC	1	5
484	Shogun (HMS)	Mean AUROC	0.886667	5
485	Shogun (HMS)	Mean AUROC	0.786667	5
486	Shogun (HMS)	Mean AUROC	0.966667	5
487	Shogun (HMS)	Mean AUROC	0.786667	5
488	Shogun (HMS)	Mean AUROC	0.966667	5
489	Shogun (HMS)	Mean AUROC	0.966667	5
490	Shogun (HMS)	Mean AUROC	0.926667	5
491	Shogun (HMS)	Mean AUROC	0.958333	10
492	Shogun (HMS)	Mean AUROC	0.988333	10
493	Shogun (HMS)	Mean AUROC	1	10
494	Shogun (HMS)	Mean AUROC	0.99	10
495	Shogun (HMS)	Mean AUROC	0.971667	10
496	Shogun (HMS)	Mean AUROC	0.985	10
497	Shogun (HMS)	Mean AUROC	0.971667	10
498	Shogun (HMS)	Mean AUROC	0.915	10
499	Shogun (HMS)	Mean AUROC	0.978333	10
500	Shogun (HMS)	Mean AUROC	0.99	10
501	Shogun (HMS)	Mean AUROC	0.980741	15
502	Shogun (HMS)	Mean AUROC	0.968148	15
503	Shogun (HMS)	Mean AUROC	0.937778	15
504	Shogun (HMS)	Mean AUROC	0.945926	15
505	Shogun (HMS)	Mean AUROC	0.94	15
506	Shogun (HMS)	Mean AUROC	0.997037	15
507	Shogun (HMS)	Mean AUROC	0.966667	15
508	Shogun (HMS)	Mean AUROC	0.991852	15
509	Shogun (HMS)	Mean AUROC	0.971111	15
510	Shogun (HMS)	Mean AUROC	0.958519	15
511	Shogun (HMS)	Mean AUROC	0.985	20
512	Shogun (HMS)	Mean AUROC	0.979167	20
513	Shogun (HMS)	Mean AUROC	0.99875	20
514	Shogun (HMS)	Mean AUROC	0.989583	20
515	Shogun (HMS)	Mean AUROC	0.998333	20
516	Shogun (HMS)	Mean AUROC	0.990417	20
517	Shogun (HMS)	Mean AUROC	0.95625	20
518	Shogun (HMS)	Mean AUROC	0.984583	20
519	Shogun (HMS)	Mean AUROC	0.99875	20
520	Shogun (HMS)	Mean AUROC	0.980417	20
521	Shogun (HMS)	Mean AUROC	0.9968	25
522	Shogun (HMS)	Mean AUROC	0.9904	25
523	Shogun (HMS)	Mean AUROC	0.997867	25
524	Shogun (HMS)	Mean AUROC	0.998667	25
525	Shogun (HMS)	Mean AUROC	0.993067	25
526	Shogun (HMS)	Mean AUROC	0.9952	25
527	Shogun (HMS)	Mean AUROC	0.9848	25
528	Shogun (HMS)	Mean AUROC	0.989333	25
529	Shogun (HMS)	Mean AUROC	0.997067	25
530	Shogun (HMS)	Mean AUROC	0.984267	25
531	Shogun (HMS)	Mean AUROC	1	30
532	Shogun (HMS)	Mean AUROC	0.995926	30
533	Shogun (HMS)	Mean AUROC	0.990185	30
534	Shogun (HMS)	Mean AUROC	0.996852	30
535	Shogun (HMS)	Mean AUROC	0.997778	30
536	Shogun (HMS)	Mean AUROC	0.998148	30
537	Shogun (HMS)	Mean AUROC	0.978519	30
538	Shogun (HMS)	Mean AUROC	0.990556	30
539	Shogun (HMS)	Mean AUROC	0.996296	30
540	Shogun (HMS)	Mean AUROC	0.994444	30
541	Shogun (HMS)	Mean AUROC	0.999592	35
542	Shogun (HMS)	Mean AUROC	0.992789	35
543	Shogun (HMS)	Mean AUROC	0.995646	35
544	Shogun (HMS)	Mean AUROC	0.998776	35
545	Shogun (HMS)	Mean AUROC	0.994014	35
546	Shogun (HMS)	Mean AUROC	0.997551	35
547	Shogun (HMS)	Mean AUROC	0.994014	35
548	Shogun (HMS)	Mean AUROC	0.997551	35
549	Shogun (HMS)	Mean AUROC	0.998639	35
550	Shogun (HMS)	Mean AUROC	0.99619	35
551	Shogun (HMS)	Mean AUROC	0.999687	40
552	Shogun (HMS)	Mean AUROC	0.994792	40
553	Shogun (HMS)	Mean AUROC	0.990521	40
554	Shogun (HMS)	Mean AUROC	0.999167	40
555	Shogun (HMS)	Mean AUROC	0.999167	40
556	Shogun (HMS)	Mean AUROC	0.998437	40
557	Shogun (HMS)	Mean AUROC	0.998854	40
558	Shogun (HMS)	Mean AUROC	0.989896	40
559	Shogun (HMS)	Mean AUROC	0.99875	40
560	Shogun (HMS)	Mean AUROC	0.994792	40
561	Shogun (Broad)	Mean AUROC	0.973333	5
562	Shogun (Broad)	Mean AUROC	0.806667	5
563	Shogun (Broad)	Mean AUROC	0.946667	5
564	Shogun (Broad)	Mean AUROC	0.846667	5
565	Shogun (Broad)	Mean AUROC	0.786667	5
566	Shogun (Broad)	Mean AUROC	0.906667	5
567	Shogun (Broad)	Mean AUROC	0.826667	5
568	Shogun (Broad)	Mean AUROC	0.82	5
569	Shogun (Broad)	Mean AUROC	0.646667	5
570	Shogun (Broad)	Mean AUROC	0.846667	5
571	Shogun (Broad)	Mean AUROC	0.921667	10
572	Shogun (Broad)	Mean AUROC	0.871667	10
573	Shogun (Broad)	Mean AUROC	0.88	10
574	Shogun (Broad)	Mean AUROC	0.923333	10
575	Shogun (Broad)	Mean AUROC	0.951667	10
576	Shogun (Broad)	Mean AUROC	0.966667	10
577	Shogun (Broad)	Mean AUROC	0.92	10
578	Shogun (Broad)	Mean AUROC	0.963333	10
579	Shogun (Broad)	Mean AUROC	0.926667	10
580	Shogun (Broad)	Mean AUROC	0.911667	10
581	Shogun (Broad)	Mean AUROC	0.971111	15
582	Shogun (Broad)	Mean AUROC	0.94	15
583	Shogun (Broad)	Mean AUROC	0.962963	15
584	Shogun (Broad)	Mean AUROC	0.959259	15
585	Shogun (Broad)	Mean AUROC	0.968889	15
586	Shogun (Broad)	Mean AUROC	0.925926	15
587	Shogun (Broad)	Mean AUROC	0.947407	15
588	Shogun (Broad)	Mean AUROC	0.973333	15
589	Shogun (Broad)	Mean AUROC	0.951111	15
590	Shogun (Broad)	Mean AUROC	0.982222	15
591	Shogun (Broad)	Mean AUROC	0.969608	20
592	Shogun (Broad)	Mean AUROC	0.977014	20
593	Shogun (Broad)	Mean AUROC	0.992925	20
594	Shogun (Broad)	Mean AUROC	0.983307	20
595	Shogun (Broad)	Mean AUROC	0.97194	20
596	Shogun (Broad)	Mean AUROC	0.969078	20
597	Shogun (Broad)	Mean AUROC	0.979226	20
598	Shogun (Broad)	Mean AUROC	0.95261	20
599	Shogun (Broad)	Mean AUROC	0.992064	20
600	Shogun (Broad)	Mean AUROC	0.972046	20
601	Shogun (Broad)	Mean AUROC	0.988814	25
602	Shogun (Broad)	Mean AUROC	0.971186	25
603	Shogun (Broad)	Mean AUROC	0.972605	25
604	Shogun (Broad)	Mean AUROC	0.95944	25
605	Shogun (Broad)	Mean AUROC	0.971821	25
606	Shogun (Broad)	Mean AUROC	0.976769	25
607	Shogun (Broad)	Mean AUROC	0.971261	25
608	Shogun (Broad)	Mean AUROC	0.966947	25
609	Shogun (Broad)	Mean AUROC	0.958599	25
610	Shogun (Broad)	Mean AUROC	0.975948	25
611	Shogun (Broad)	Mean AUROC	0.970755	30
612	Shogun (Broad)	Mean AUROC	0.971687	30
613	Shogun (Broad)	Mean AUROC	0.962766	30
614	Shogun (Broad)	Mean AUROC	0.96586	30
615	Shogun (Broad)	Mean AUROC	0.965213	30
616	Shogun (Broad)	Mean AUROC	0.972187	30
617	Shogun (Broad)	Mean AUROC	0.984008	30
618	Shogun (Broad)	Mean AUROC	0.963072	30
619	Shogun (Broad)	Mean AUROC	0.974948	30
620	Shogun (Broad)	Mean AUROC	0.98512	30
621	Shogun (Broad)	Mean AUROC	0.980597	35
622	Shogun (Broad)	Mean AUROC	0.983387	35
623	Shogun (Broad)	Mean AUROC	0.984411	35
624	Shogun (Broad)	Mean AUROC	0.97827	35
625	Shogun (Broad)	Mean AUROC	0.958134	35
626	Shogun (Broad)	Mean AUROC	0.975835	35
627	Shogun (Broad)	Mean AUROC	0.977149	35
628	Shogun (Broad)	Mean AUROC	0.986253	35
629	Shogun (Broad)	Mean AUROC	0.970718	35
630	Shogun (Broad)	Mean AUROC	0.96741	35
631	Shogun (Broad)	Mean AUROC	0.984795	40
632	Shogun (Broad)	Mean AUROC	0.981913	40
633	Shogun (Broad)	Mean AUROC	0.979755	40
634	Shogun (Broad)	Mean AUROC	0.985953	40
635	Shogun (Broad)	Mean AUROC	0.983567	40
636	Shogun (Broad)	Mean AUROC	0.986808	40
637	Shogun (Broad)	Mean AUROC	0.97304	40
638	Shogun (Broad)	Mean AUROC	0.987795	40
639	Shogun (Broad)	Mean AUROC	0.981448	40
640	Shogun (Broad)	Mean AUROC	0.981911	40
641	Kraken (HMS)	Mean AUPR	0.8	5
642	Kraken (HMS)	Mean AUPR	0.573589	5
643	Kraken (HMS)	Mean AUPR	0.587249	5
644	Kraken (HMS)	Mean AUPR	0.683968	5
645	Kraken (HMS)	Mean AUPR	0.464767	5
646	Kraken (HMS)	Mean AUPR	0.423292	5
647	Kraken (HMS)	Mean AUPR	0.539411	5
648	Kraken (HMS)	Mean AUPR	0.676151	5
649	Kraken (HMS)	Mean AUPR	0.548307	5
650	Kraken (HMS)	Mean AUPR	0.530037	5
651	Kraken (HMS)	Mean AUPR	0.871503	10
652	Kraken (HMS)	Mean AUPR	0.893636	10
653	Kraken (HMS)	Mean AUPR	0.862113	10
654	Kraken (HMS)	Mean AUPR	0.880038	10
655	Kraken (HMS)	Mean AUPR	0.881128	10
656	Kraken (HMS)	Mean AUPR	0.858683	10
657	Kraken (HMS)	Mean AUPR	0.875467	10
658	Kraken (HMS)	Mean AUPR	0.833902	10
659	Kraken (HMS)	Mean AUPR	0.847641	10
660	Kraken (HMS)	Mean AUPR	0.851867	10
661	Kraken (HMS)	Mean AUPR	0.921132	15
662	Kraken (HMS)	Mean AUPR	0.908051	15
663	Kraken (HMS)	Mean AUPR	0.915839	15
664	Kraken (HMS)	Mean AUPR	0.852164	15
665	Kraken (HMS)	Mean AUPR	0.89945	15
666	Kraken (HMS)	Mean AUPR	0.933333	15
667	Kraken (HMS)	Mean AUPR	0.908175	15
668	Kraken (HMS)	Mean AUPR	0.928086	15
669	Kraken (HMS)	Mean AUPR	0.903032	15
670	Kraken (HMS)	Mean AUPR	0.933333	15
671	Kraken (HMS)	Mean AUPR	0.930664	20
672	Kraken (HMS)	Mean AUPR	0.91543	20
673	Kraken (HMS)	Mean AUPR	0.948449	20
674	Kraken (HMS)	Mean AUPR	0.949187	20
675	Kraken (HMS)	Mean AUPR	0.937391	20
676	Kraken (HMS)	Mean AUPR	0.948373	20
677	Kraken (HMS)	Mean AUPR	0.935756	20
678	Kraken (HMS)	Mean AUPR	0.933563	20
679	Kraken (HMS)	Mean AUPR	0.943613	20
680	Kraken (HMS)	Mean AUPR	0.928767	20
681	Kraken (HMS)	Mean AUPR	0.945485	25
682	Kraken (HMS)	Mean AUPR	0.946979	25
683	Kraken (HMS)	Mean AUPR	0.959477	25
684	Kraken (HMS)	Mean AUPR	0.950815	25
685	Kraken (HMS)	Mean AUPR	0.939951	25
686	Kraken (HMS)	Mean AUPR	0.958449	25
687	Kraken (HMS)	Mean AUPR	0.955017	25
688	Kraken (HMS)	Mean AUPR	0.957926	25
689	Kraken (HMS)	Mean AUPR	0.952518	25
690	Kraken (HMS)	Mean AUPR	0.950711	25
691	Kraken (HMS)	Mean AUPR	0.964912	30
692	Kraken (HMS)	Mean AUPR	0.962034	30
693	Kraken (HMS)	Mean AUPR	0.963804	30
694	Kraken (HMS)	Mean AUPR	0.94175	30
695	Kraken (HMS)	Mean AUPR	0.962157	30
696	Kraken (HMS)	Mean AUPR	0.959988	30
697	Kraken (HMS)	Mean AUPR	0.953117	30
698	Kraken (HMS)	Mean AUPR	0.964767	30
699	Kraken (HMS)	Mean AUPR	0.960828	30
700	Kraken (HMS)	Mean AUPR	0.966667	30
701	Kraken (HMS)	Mean AUPR	0.965725	35
702	Kraken (HMS)	Mean AUPR	0.969015	35
703	Kraken (HMS)	Mean AUPR	0.968408	35
704	Kraken (HMS)	Mean AUPR	0.96727	35
705	Kraken (HMS)	Mean AUPR	0.9687	35
706	Kraken (HMS)	Mean AUPR	0.97116	35
707	Kraken (HMS)	Mean AUPR	0.968843	35
708	Kraken (HMS)	Mean AUPR	0.968195	35
709	Kraken (HMS)	Mean AUPR	0.967758	35
710	Kraken (HMS)	Mean AUPR	0.966919	35
711	Kraken (HMS)	Mean AUPR	0.973965	40
712	Kraken (HMS)	Mean AUPR	0.973965	40
713	Kraken (HMS)	Mean AUPR	0.974393	40
714	Kraken (HMS)	Mean AUPR	0.9736	40
715	Kraken (HMS)	Mean AUPR	0.970109	40
716	Kraken (HMS)	Mean AUPR	0.969495	40
717	Kraken (HMS)	Mean AUPR	0.971073	40
718	Kraken (HMS)	Mean AUPR	0.971557	40
719	Kraken (HMS)	Mean AUPR	0.975	40
720	Kraken (HMS)	Mean AUPR	0.962773	40
721	Kraken (Broad)	Mean AUPR	0.551114	5
722	Kraken (Broad)	Mean AUPR	0.554004	5
723	Kraken (Broad)	Mean AUPR	0.526415	5
724	Kraken (Broad)	Mean AUPR	0.571156	5
725	Kraken (Broad)	Mean AUPR	0.760556	5
726	Kraken (Broad)	Mean AUPR	0.752143	5
727	Kraken (Broad)	Mean AUPR	0.8	5
728	Kraken (Broad)	Mean AUPR	0.558386	5
729	Kraken (Broad)	Mean AUPR	0.54142	5
730	Kraken (Broad)	Mean AUPR	0.521693	5
731	Kraken (Broad)	Mean AUPR	0.876466	10
732	Kraken (Broad)	Mean AUPR	0.810974	10
733	Kraken (Broad)	Mean AUPR	0.880038	10
734	Kraken (Broad)	Mean AUPR	0.852546	10
735	Kraken (Broad)	Mean AUPR	0.813954	10
736	Kraken (Broad)	Mean AUPR	0.828334	10
737	Kraken (Broad)	Mean AUPR	0.9	10
738	Kraken (Broad)	Mean AUPR	0.896818	10
739	Kraken (Broad)	Mean AUPR	0.877201	10
740	Kraken (Broad)	Mean AUPR	0.893636	10
741	Kraken (Broad)	Mean AUPR	0.914652	15
742	Kraken (Broad)	Mean AUPR	0.923636	15
743	Kraken (Broad)	Mean AUPR	0.924021	15
744	Kraken (Broad)	Mean AUPR	0.889467	15
745	Kraken (Broad)	Mean AUPR	0.923856	15
746	Kraken (Broad)	Mean AUPR	0.922308	15
747	Kraken (Broad)	Mean AUPR	0.878043	15
748	Kraken (Broad)	Mean AUPR	0.914867	15
749	Kraken (Broad)	Mean AUPR	0.90931	15
750	Kraken (Broad)	Mean AUPR	0.927668	15
751	Kraken (Broad)	Mean AUPR	0.946245	20
752	Kraken (Broad)	Mean AUPR	0.930505	20
753	Kraken (Broad)	Mean AUPR	0.927777	20
754	Kraken (Broad)	Mean AUPR	0.943935	20
755	Kraken (Broad)	Mean AUPR	0.909381	20
756	Kraken (Broad)	Mean AUPR	0.946245	20
757	Kraken (Broad)	Mean AUPR	0.945124	20
758	Kraken (Broad)	Mean AUPR	0.927654	20
759	Kraken (Broad)	Mean AUPR	0.931031	20
760	Kraken (Broad)	Mean AUPR	0.908152	20
761	Kraken (Broad)	Mean AUPR	0.933951	25
762	Kraken (Broad)	Mean AUPR	0.932262	25
763	Kraken (Broad)	Mean AUPR	0.941774	25
764	Kraken (Broad)	Mean AUPR	0.936185	25
765	Kraken (Broad)	Mean AUPR	0.934933	25
766	Kraken (Broad)	Mean AUPR	0.937329	25
767	Kraken (Broad)	Mean AUPR	0.912256	25
768	Kraken (Broad)	Mean AUPR	0.940988	25
769	Kraken (Broad)	Mean AUPR	0.94273	25
770	Kraken (Broad)	Mean AUPR	0.941904	25
771	Kraken (Broad)	Mean AUPR	0.940552	30
772	Kraken (Broad)	Mean AUPR	0.954456	30
773	Kraken (Broad)	Mean AUPR	0.938103	30
774	Kraken (Broad)	Mean AUPR	0.937509	30
775	Kraken (Broad)	Mean AUPR	0.942108	30
776	Kraken (Broad)	Mean AUPR	0.951278	30
777	Kraken (Broad)	Mean AUPR	0.930755	30
778	Kraken (Broad)	Mean AUPR	0.946	30
779	Kraken (Broad)	Mean AUPR	0.944384	30
780	Kraken (Broad)	Mean AUPR	0.951705	30
781	Kraken (Broad)	Mean AUPR	0.937699	35
782	Kraken (Broad)	Mean AUPR	0.949822	35
783	Kraken (Broad)	Mean AUPR	0.9408	35
784	Kraken (Broad)	Mean AUPR	0.952604	35
785	Kraken (Broad)	Mean AUPR	0.946635	35
786	Kraken (Broad)	Mean AUPR	0.948891	35
787	Kraken (Broad)	Mean AUPR	0.923416	35
788	Kraken (Broad)	Mean AUPR	0.946915	35
789	Kraken (Broad)	Mean AUPR	0.952095	35
790	Kraken (Broad)	Mean AUPR	0.946512	35
791	Kraken (Broad)	Mean AUPR	0.947044	40
792	Kraken (Broad)	Mean AUPR	0.930114	40
793	Kraken (Broad)	Mean AUPR	0.955598	40
794	Kraken (Broad)	Mean AUPR	0.949816	40
795	Kraken (Broad)	Mean AUPR	0.945128	40
796	Kraken (Broad)	Mean AUPR	0.950833	40
797	Kraken (Broad)	Mean AUPR	0.946429	40
798	Kraken (Broad)	Mean AUPR	0.941824	40
799	Kraken (Broad)	Mean AUPR	0.939307	40
800	Kraken (Broad)	Mean AUPR	0.922629	40
801	Shogun (HMS)	Mean AUPR	0.743272	5
802	Shogun (HMS)	Mean AUPR	0.607216	5
803	Shogun (HMS)	Mean AUPR	0.8	5
804	Shogun (HMS)	Mean AUPR	0.623717	5
805	Shogun (HMS)	Mean AUPR	0.574762	5
806	Shogun (HMS)	Mean AUPR	0.745992	5
807	Shogun (HMS)	Mean AUPR	0.527876	5
808	Shogun (HMS)	Mean AUPR	0.732698	5
809	Shogun (HMS)	Mean AUPR	0.756296	5
810	Shogun (HMS)	Mean AUPR	0.675079	5
811	Shogun (HMS)	Mean AUPR	0.830317	10
812	Shogun (HMS)	Mean AUPR	0.879142	10
813	Shogun (HMS)	Mean AUPR	0.9	10
814	Shogun (HMS)	Mean AUPR	0.881684	10
815	Shogun (HMS)	Mean AUPR	0.847641	10
816	Shogun (HMS)	Mean AUPR	0.872774	10
817	Shogun (HMS)	Mean AUPR	0.846485	10
818	Shogun (HMS)	Mean AUPR	0.76461	10
819	Shogun (HMS)	Mean AUPR	0.8617	10
820	Shogun (HMS)	Mean AUPR	0.880375	10
821	Shogun (HMS)	Mean AUPR	0.902063	15
822	Shogun (HMS)	Mean AUPR	0.877621	15
823	Shogun (HMS)	Mean AUPR	0.823658	15
824	Shogun (HMS)	Mean AUPR	0.863091	15
825	Shogun (HMS)	Mean AUPR	0.820005	15
826	Shogun (HMS)	Mean AUPR	0.927668	15
827	Shogun (HMS)	Mean AUPR	0.889829	15
828	Shogun (HMS)	Mean AUPR	0.919213	15
829	Shogun (HMS)	Mean AUPR	0.882771	15
830	Shogun (HMS)	Mean AUPR	0.863966	15
831	Shogun (HMS)	Mean AUPR	0.923309	20
832	Shogun (HMS)	Mean AUPR	0.912008	20
833	Shogun (HMS)	Mean AUPR	0.947777	20
834	Shogun (HMS)	Mean AUPR	0.931866	20
835	Shogun (HMS)	Mean AUPR	0.947162	20
836	Shogun (HMS)	Mean AUPR	0.93305	20
837	Shogun (HMS)	Mean AUPR	0.879334	20
838	Shogun (HMS)	Mean AUPR	0.930308	20
839	Shogun (HMS)	Mean AUPR	0.947777	20
840	Shogun (HMS)	Mean AUPR	0.913783	20
841	Shogun (HMS)	Mean AUPR	0.953845	25
842	Shogun (HMS)	Mean AUPR	0.944179	25
843	Shogun (HMS)	Mean AUPR	0.956075	25
844	Shogun (HMS)	Mean AUPR	0.957477	25
845	Shogun (HMS)	Mean AUPR	0.94639	25
846	Shogun (HMS)	Mean AUPR	0.951034	25
847	Shogun (HMS)	Mean AUPR	0.939406	25
848	Shogun (HMS)	Mean AUPR	0.941105	25
849	Shogun (HMS)	Mean AUPR	0.955082	25
850	Shogun (HMS)	Mean AUPR	0.934382	25
851	Shogun (HMS)	Mean AUPR	0.966667	30
852	Shogun (HMS)	Mean AUPR	0.958716	30
853	Shogun (HMS)	Mean AUPR	0.947816	30
854	Shogun (HMS)	Mean AUPR	0.961236	30
855	Shogun (HMS)	Mean AUPR	0.962419	30
856	Shogun (HMS)	Mean AUPR	0.963035	30
857	Shogun (HMS)	Mean AUPR	0.921688	30
858	Shogun (HMS)	Mean AUPR	0.949737	30
859	Shogun (HMS)	Mean AUPR	0.959632	30
860	Shogun (HMS)	Mean AUPR	0.957063	30
861	Shogun (HMS)	Mean AUPR	0.970638	35
862	Shogun (HMS)	Mean AUPR	0.958533	35
863	Shogun (HMS)	Mean AUPR	0.963118	35
864	Shogun (HMS)	Mean AUPR	0.969106	35
865	Shogun (HMS)	Mean AUPR	0.960288	35
866	Shogun (HMS)	Mean AUPR	0.966771	35
867	Shogun (HMS)	Mean AUPR	0.9598	35
868	Shogun (HMS)	Mean AUPR	0.966768	35
869	Shogun (HMS)	Mean AUPR	0.968734	35
870	Shogun (HMS)	Mean AUPR	0.964942	35
871	Shogun (HMS)	Mean AUPR	0.974377	40
872	Shogun (HMS)	Mean AUPR	0.965033	40
873	Shogun (HMS)	Mean AUPR	0.960266	40
874	Shogun (HMS)	Mean AUPR	0.973436	40
875	Shogun (HMS)	Mean AUPR	0.973374	40
876	Shogun (HMS)	Mean AUPR	0.971915	40
877	Shogun (HMS)	Mean AUPR	0.972969	40
878	Shogun (HMS)	Mean AUPR	0.956466	40
879	Shogun (HMS)	Mean AUPR	0.972505	40
880	Shogun (HMS)	Mean AUPR	0.964962	40
881	Shogun (Broad)	Mean AUPR	0.760992	5
882	Shogun (Broad)	Mean AUPR	0.552373	5
883	Shogun (Broad)	Mean AUPR	0.705913	5
884	Shogun (Broad)	Mean AUPR	0.566548	5
885	Shogun (Broad)	Mean AUPR	0.57711	5
886	Shogun (Broad)	Mean AUPR	0.662222	5
887	Shogun (Broad)	Mean AUPR	0.591235	5
888	Shogun (Broad)	Mean AUPR	0.583942	5
889	Shogun (Broad)	Mean AUPR	0.40978	5
890	Shogun (Broad)	Mean AUPR	0.614312	5
891	Shogun (Broad)	Mean AUPR	0.797373	10
892	Shogun (Broad)	Mean AUPR	0.697548	10
893	Shogun (Broad)	Mean AUPR	0.711335	10
894	Shogun (Broad)	Mean AUPR	0.775518	10
895	Shogun (Broad)	Mean AUPR	0.795647	10
896	Shogun (Broad)	Mean AUPR	0.841805	10
897	Shogun (Broad)	Mean AUPR	0.768956	10
898	Shogun (Broad)	Mean AUPR	0.839589	10
899	Shogun (Broad)	Mean AUPR	0.781262	10
900	Shogun (Broad)	Mean AUPR	0.7745	10
901	Shogun (Broad)	Mean AUPR	0.883934	15
902	Shogun (Broad)	Mean AUPR	0.832964	15
903	Shogun (Broad)	Mean AUPR	0.871735	15
904	Shogun (Broad)	Mean AUPR	0.866468	15
905	Shogun (Broad)	Mean AUPR	0.881013	15
906	Shogun (Broad)	Mean AUPR	0.804879	15
907	Shogun (Broad)	Mean AUPR	0.836819	15
908	Shogun (Broad)	Mean AUPR	0.884286	15
909	Shogun (Broad)	Mean AUPR	0.84797	15
910	Shogun (Broad)	Mean AUPR	0.90176	15
911	Shogun (Broad)	Mean AUPR	0.887238	20
912	Shogun (Broad)	Mean AUPR	0.912114	20
913	Shogun (Broad)	Mean AUPR	0.934305	20
914	Shogun (Broad)	Mean AUPR	0.919355	20
915	Shogun (Broad)	Mean AUPR	0.888089	20
916	Shogun (Broad)	Mean AUPR	0.894433	20
917	Shogun (Broad)	Mean AUPR	0.913754	20
918	Shogun (Broad)	Mean AUPR	0.866805	20
919	Shogun (Broad)	Mean AUPR	0.931633	20
920	Shogun (Broad)	Mean AUPR	0.903687	20
921	Shogun (Broad)	Mean AUPR	0.929723	25
922	Shogun (Broad)	Mean AUPR	0.891071	25
923	Shogun (Broad)	Mean AUPR	0.902219	25
924	Shogun (Broad)	Mean AUPR	0.888637	25
925	Shogun (Broad)	Mean AUPR	0.902953	25
926	Shogun (Broad)	Mean AUPR	0.917	25
927	Shogun (Broad)	Mean AUPR	0.89563	25
928	Shogun (Broad)	Mean AUPR	0.895122	25
929	Shogun (Broad)	Mean AUPR	0.888256	25
930	Shogun (Broad)	Mean AUPR	0.9099	25
931	Shogun (Broad)	Mean AUPR	0.924427	30
932	Shogun (Broad)	Mean AUPR	0.891613	30
933	Shogun (Broad)	Mean AUPR	0.901965	30
934	Shogun (Broad)	Mean AUPR	0.887653	30
935	Shogun (Broad)	Mean AUPR	0.89078	30
936	Shogun (Broad)	Mean AUPR	0.902268	30
937	Shogun (Broad)	Mean AUPR	0.925907	30
938	Shogun (Broad)	Mean AUPR	0.888948	30
939	Shogun (Broad)	Mean AUPR	0.922758	30
940	Shogun (Broad)	Mean AUPR	0.927069	30
941	Shogun (Broad)	Mean AUPR	0.93235	35
942	Shogun (Broad)	Mean AUPR	0.941697	35
943	Shogun (Broad)	Mean AUPR	0.926732	35
944	Shogun (Broad)	Mean AUPR	0.92991	35
945	Shogun (Broad)	Mean AUPR	0.90584	35
946	Shogun (Broad)	Mean AUPR	0.914804	35
947	Shogun (Broad)	Mean AUPR	0.91424	35
948	Shogun (Broad)	Mean AUPR	0.931138	35
949	Shogun (Broad)	Mean AUPR	0.917152	35
950	Shogun (Broad)	Mean AUPR	0.916107	35
951	Shogun (Broad)	Mean AUPR	0.936861	40
952	Shogun (Broad)	Mean AUPR	0.931933	40
953	Shogun (Broad)	Mean AUPR	0.897416	40
954	Shogun (Broad)	Mean AUPR	0.934883	40
955	Shogun (Broad)	Mean AUPR	0.941598	40
956	Shogun (Broad)	Mean AUPR	0.93573	40
957	Shogun (Broad)	Mean AUPR	0.923726	40
958	Shogun (Broad)	Mean AUPR	0.940985	40
959	Shogun (Broad)	Mean AUPR	0.934635	40
960	Shogun (Broad)	Mean AUPR	0.929337	40
961	Kraken (HMS)	Accuracy	1	5
962	Kraken (HMS)	Accuracy	0.666667	5
963	Kraken (HMS)	Accuracy	0.666667	5
964	Kraken (HMS)	Accuracy	0.866667	5
965	Kraken (HMS)	Accuracy	0.466667	5
966	Kraken (HMS)	Accuracy	0.533333	5
967	Kraken (HMS)	Accuracy	0.666667	5
968	Kraken (HMS)	Accuracy	0.6	5
969	Kraken (HMS)	Accuracy	0.533333	5
970	Kraken (HMS)	Accuracy	0.733333	5
971	Kraken (HMS)	Accuracy	0.933333	10
972	Kraken (HMS)	Accuracy	0.933333	10
973	Kraken (HMS)	Accuracy	0.866667	10
974	Kraken (HMS)	Accuracy	0.9	10
975	Kraken (HMS)	Accuracy	0.866667	10
976	Kraken (HMS)	Accuracy	0.933333	10
977	Kraken (HMS)	Accuracy	0.9	10
978	Kraken (HMS)	Accuracy	0.9	10
979	Kraken (HMS)	Accuracy	0.9	10
980	Kraken (HMS)	Accuracy	0.833333	10
981	Kraken (HMS)	Accuracy	0.933333	15
982	Kraken (HMS)	Accuracy	0.911111	15
983	Kraken (HMS)	Accuracy	0.933333	15
984	Kraken (HMS)	Accuracy	0.888889	15
985	Kraken (HMS)	Accuracy	0.955556	15
986	Kraken (HMS)	Accuracy	0.955556	15
987	Kraken (HMS)	Accuracy	0.888889	15
988	Kraken (HMS)	Accuracy	0.955556	15
989	Kraken (HMS)	Accuracy	0.911111	15
990	Kraken (HMS)	Accuracy	0.977778	15
991	Kraken (HMS)	Accuracy	0.883333	20
992	Kraken (HMS)	Accuracy	0.9	20
993	Kraken (HMS)	Accuracy	0.983333	20
994	Kraken (HMS)	Accuracy	0.983333	20
995	Kraken (HMS)	Accuracy	0.916667	20
996	Kraken (HMS)	Accuracy	0.966667	20
997	Kraken (HMS)	Accuracy	0.95	20
998	Kraken (HMS)	Accuracy	0.966667	20
999	Kraken (HMS)	Accuracy	0.95	20
1000	Kraken (HMS)	Accuracy	0.916667	20
1001	Kraken (HMS)	Accuracy	0.973333	25
1002	Kraken (HMS)	Accuracy	0.96	25
1003	Kraken (HMS)	Accuracy	0.973333	25
1004	Kraken (HMS)	Accuracy	0.946667	25
1005	Kraken (HMS)	Accuracy	0.96	25
1006	Kraken (HMS)	Accuracy	0.973333	25
1007	Kraken (HMS)	Accuracy	0.96	25
1008	Kraken (HMS)	Accuracy	0.973333	25
1009	Kraken (HMS)	Accuracy	0.946667	25
1010	Kraken (HMS)	Accuracy	0.986667	25
1011	Kraken (HMS)	Accuracy	0.966667	30
1012	Kraken (HMS)	Accuracy	0.955556	30
1013	Kraken (HMS)	Accuracy	0.977778	30
1014	Kraken (HMS)	Accuracy	0.933333	30
1015	Kraken (HMS)	Accuracy	0.966667	30
1016	Kraken (HMS)	Accuracy	0.966667	30
1017	Kraken (HMS)	Accuracy	0.922222	30
1018	Kraken (HMS)	Accuracy	0.988889	30
1019	Kraken (HMS)	Accuracy	0.955556	30
1020	Kraken (HMS)	Accuracy	0.988889	30
1021	Kraken (HMS)	Accuracy	0.980952	35
1022	Kraken (HMS)	Accuracy	0.980952	35
1023	Kraken (HMS)	Accuracy	0.971429	35
1024	Kraken (HMS)	Accuracy	0.961905	35
1025	Kraken (HMS)	Accuracy	0.990476	35
1026	Kraken (HMS)	Accuracy	0.971429	35
1027	Kraken (HMS)	Accuracy	0.971429	35
1028	Kraken (HMS)	Accuracy	0.980952	35
1029	Kraken (HMS)	Accuracy	0.952381	35
1030	Kraken (HMS)	Accuracy	0.971429	35
1031	Kraken (HMS)	Accuracy	0.966667	40
1032	Kraken (HMS)	Accuracy	0.991667	40
1033	Kraken (HMS)	Accuracy	0.983333	40
1034	Kraken (HMS)	Accuracy	0.983333	40
1035	Kraken (HMS)	Accuracy	0.958333	40
1036	Kraken (HMS)	Accuracy	0.95	40
1037	Kraken (HMS)	Accuracy	0.975	40
1038	Kraken (HMS)	Accuracy	0.966667	40
1039	Kraken (HMS)	Accuracy	1	40
1040	Kraken (HMS)	Accuracy	0.975	40
1041	Kraken (Broad)	Accuracy	0.533333	5
1042	Kraken (Broad)	Accuracy	0.8	5
1043	Kraken (Broad)	Accuracy	0.666667	5
1044	Kraken (Broad)	Accuracy	0.733333	5
1045	Kraken (Broad)	Accuracy	0.866667	5
1046	Kraken (Broad)	Accuracy	0.933333	5
1047	Kraken (Broad)	Accuracy	1	5
1048	Kraken (Broad)	Accuracy	0.733333	5
1049	Kraken (Broad)	Accuracy	0.8	5
1050	Kraken (Broad)	Accuracy	0.6	5
1051	Kraken (Broad)	Accuracy	0.933333	10
1052	Kraken (Broad)	Accuracy	0.833333	10
1053	Kraken (Broad)	Accuracy	0.9	10
1054	Kraken (Broad)	Accuracy	0.833333	10
1055	Kraken (Broad)	Accuracy	0.833333	10
1056	Kraken (Broad)	Accuracy	0.933333	10
1057	Kraken (Broad)	Accuracy	1	10
1058	Kraken (Broad)	Accuracy	0.933333	10
1059	Kraken (Broad)	Accuracy	0.933333	10
1060	Kraken (Broad)	Accuracy	0.933333	10
1061	Kraken (Broad)	Accuracy	0.888889	15
1062	Kraken (Broad)	Accuracy	0.911111	15
1063	Kraken (Broad)	Accuracy	0.955556	15
1064	Kraken (Broad)	Accuracy	0.911111	15
1065	Kraken (Broad)	Accuracy	0.955556	15
1066	Kraken (Broad)	Accuracy	0.955556	15
1067	Kraken (Broad)	Accuracy	0.888889	15
1068	Kraken (Broad)	Accuracy	0.933333	15
1069	Kraken (Broad)	Accuracy	0.888889	15
1070	Kraken (Broad)	Accuracy	0.955556	15
1071	Kraken (Broad)	Accuracy	0.982456	20
1072	Kraken (Broad)	Accuracy	0.912281	20
1073	Kraken (Broad)	Accuracy	0.929825	20
1074	Kraken (Broad)	Accuracy	0.964912	20
1075	Kraken (Broad)	Accuracy	0.929825	20
1076	Kraken (Broad)	Accuracy	0.964912	20
1077	Kraken (Broad)	Accuracy	0.982456	20
1078	Kraken (Broad)	Accuracy	0.947368	20
1079	Kraken (Broad)	Accuracy	0.894737	20
1080	Kraken (Broad)	Accuracy	0.877193	20
1081	Kraken (Broad)	Accuracy	0.910448	25
1082	Kraken (Broad)	Accuracy	0.925373	25
1083	Kraken (Broad)	Accuracy	0.925373	25
1084	Kraken (Broad)	Accuracy	0.925373	25
1085	Kraken (Broad)	Accuracy	0.895522	25
1086	Kraken (Broad)	Accuracy	0.940299	25
1087	Kraken (Broad)	Accuracy	0.910448	25
1088	Kraken (Broad)	Accuracy	0.955224	25
1089	Kraken (Broad)	Accuracy	0.940299	25
1090	Kraken (Broad)	Accuracy	0.910448	25
1091	Kraken (Broad)	Accuracy	0.922078	30
1092	Kraken (Broad)	Accuracy	0.948052	30
1093	Kraken (Broad)	Accuracy	0.896104	30
1094	Kraken (Broad)	Accuracy	0.896104	30
1095	Kraken (Broad)	Accuracy	0.922078	30
1096	Kraken (Broad)	Accuracy	0.948052	30
1097	Kraken (Broad)	Accuracy	0.922078	30
1098	Kraken (Broad)	Accuracy	0.961039	30
1099	Kraken (Broad)	Accuracy	0.974026	30
1100	Kraken (Broad)	Accuracy	0.961039	30
1101	Kraken (Broad)	Accuracy	0.942529	35
1102	Kraken (Broad)	Accuracy	0.954023	35
1103	Kraken (Broad)	Accuracy	0.91954	35
1104	Kraken (Broad)	Accuracy	0.942529	35
1105	Kraken (Broad)	Accuracy	0.896552	35
1106	Kraken (Broad)	Accuracy	0.931034	35
1107	Kraken (Broad)	Accuracy	0.931034	35
1108	Kraken (Broad)	Accuracy	0.965517	35
1109	Kraken (Broad)	Accuracy	0.942529	35
1110	Kraken (Broad)	Accuracy	0.931034	35
1111	Kraken (Broad)	Accuracy	0.948454	40
1112	Kraken (Broad)	Accuracy	0.917526	40
1113	Kraken (Broad)	Accuracy	0.948454	40
1114	Kraken (Broad)	Accuracy	0.927835	40
1115	Kraken (Broad)	Accuracy	0.927835	40
1116	Kraken (Broad)	Accuracy	0.948454	40
1117	Kraken (Broad)	Accuracy	0.927835	40
1118	Kraken (Broad)	Accuracy	0.927835	40
1119	Kraken (Broad)	Accuracy	0.938144	40
1120	Kraken (Broad)	Accuracy	0.948454	40
1121	Shogun (HMS)	Accuracy	0.933333	5
1122	Shogun (HMS)	Accuracy	0.733333	5
1123	Shogun (HMS)	Accuracy	0.933333	5
1124	Shogun (HMS)	Accuracy	0.8	5
1125	Shogun (HMS)	Accuracy	0.733333	5
1126	Shogun (HMS)	Accuracy	0.8	5
1127	Shogun (HMS)	Accuracy	0.533333	5
1128	Shogun (HMS)	Accuracy	0.933333	5
1129	Shogun (HMS)	Accuracy	0.933333	5
1130	Shogun (HMS)	Accuracy	0.866667	5
1131	Shogun (HMS)	Accuracy	0.833333	10
1132	Shogun (HMS)	Accuracy	0.866667	10
1133	Shogun (HMS)	Accuracy	0.933333	10
1134	Shogun (HMS)	Accuracy	0.9	10
1135	Shogun (HMS)	Accuracy	0.933333	10
1136	Shogun (HMS)	Accuracy	0.833333	10
1137	Shogun (HMS)	Accuracy	0.8	10
1138	Shogun (HMS)	Accuracy	0.8	10
1139	Shogun (HMS)	Accuracy	0.9	10
1140	Shogun (HMS)	Accuracy	0.9	10
1141	Shogun (HMS)	Accuracy	0.888889	15
1142	Shogun (HMS)	Accuracy	0.866667	15
1143	Shogun (HMS)	Accuracy	0.933333	15
1144	Shogun (HMS)	Accuracy	0.911111	15
1145	Shogun (HMS)	Accuracy	0.911111	15
1146	Shogun (HMS)	Accuracy	0.933333	15
1147	Shogun (HMS)	Accuracy	0.911111	15
1148	Shogun (HMS)	Accuracy	0.933333	15
1149	Shogun (HMS)	Accuracy	0.822222	15
1150	Shogun (HMS)	Accuracy	0.888889	15
1151	Shogun (HMS)	Accuracy	0.9	20
1152	Shogun (HMS)	Accuracy	0.866667	20
1153	Shogun (HMS)	Accuracy	0.983333	20
1154	Shogun (HMS)	Accuracy	0.916667	20
1155	Shogun (HMS)	Accuracy	0.966667	20
1156	Shogun (HMS)	Accuracy	0.933333	20
1157	Shogun (HMS)	Accuracy	0.866667	20
1158	Shogun (HMS)	Accuracy	0.966667	20
1159	Shogun (HMS)	Accuracy	0.983333	20
1160	Shogun (HMS)	Accuracy	0.916667	20
1161	Shogun (HMS)	Accuracy	0.946667	25
1162	Shogun (HMS)	Accuracy	0.946667	25
1163	Shogun (HMS)	Accuracy	0.96	25
1164	Shogun (HMS)	Accuracy	0.973333	25
1165	Shogun (HMS)	Accuracy	0.96	25
1166	Shogun (HMS)	Accuracy	0.96	25
1167	Shogun (HMS)	Accuracy	0.933333	25
1168	Shogun (HMS)	Accuracy	0.933333	25
1169	Shogun (HMS)	Accuracy	0.973333	25
1170	Shogun (HMS)	Accuracy	0.946667	25
1171	Shogun (HMS)	Accuracy	1	30
1172	Shogun (HMS)	Accuracy	0.955556	30
1173	Shogun (HMS)	Accuracy	0.933333	30
1174	Shogun (HMS)	Accuracy	0.966667	30
1175	Shogun (HMS)	Accuracy	0.955556	30
1176	Shogun (HMS)	Accuracy	0.966667	30
1177	Shogun (HMS)	Accuracy	0.922222	30
1178	Shogun (HMS)	Accuracy	0.911111	30
1179	Shogun (HMS)	Accuracy	0.955556	30
1180	Shogun (HMS)	Accuracy	0.955556	30
1181	Shogun (HMS)	Accuracy	0.971429	35
1182	Shogun (HMS)	Accuracy	0.952381	35
1183	Shogun (HMS)	Accuracy	0.942857	35
1184	Shogun (HMS)	Accuracy	0.971429	35
1185	Shogun (HMS)	Accuracy	0.952381	35
1186	Shogun (HMS)	Accuracy	0.971429	35
1187	Shogun (HMS)	Accuracy	0.961905	35
1188	Shogun (HMS)	Accuracy	0.961905	35
1189	Shogun (HMS)	Accuracy	0.961905	35
1190	Shogun (HMS)	Accuracy	0.952381	35
1191	Shogun (HMS)	Accuracy	0.983333	40
1192	Shogun (HMS)	Accuracy	0.958333	40
1193	Shogun (HMS)	Accuracy	0.95	40
1194	Shogun (HMS)	Accuracy	0.975	40
1195	Shogun (HMS)	Accuracy	0.983333	40
1196	Shogun (HMS)	Accuracy	0.958333	40
1197	Shogun (HMS)	Accuracy	0.983333	40
1198	Shogun (HMS)	Accuracy	0.975	40
1199	Shogun (HMS)	Accuracy	0.975	40
1200	Shogun (HMS)	Accuracy	0.983333	40
1201	Shogun (Broad)	Accuracy	0.8	5
1202	Shogun (Broad)	Accuracy	0.6	5
1203	Shogun (Broad)	Accuracy	0.8	5
1204	Shogun (Broad)	Accuracy	0.6	5
1205	Shogun (Broad)	Accuracy	0.8	5
1206	Shogun (Broad)	Accuracy	0.733333	5
1207	Shogun (Broad)	Accuracy	0.6	5
1208	Shogun (Broad)	Accuracy	0.666667	5
1209	Shogun (Broad)	Accuracy	0.466667	5
1210	Shogun (Broad)	Accuracy	0.733333	5
1211	Shogun (Broad)	Accuracy	0.9	10
1212	Shogun (Broad)	Accuracy	0.766667	10
1213	Shogun (Broad)	Accuracy	0.766667	10
1214	Shogun (Broad)	Accuracy	0.866667	10
1215	Shogun (Broad)	Accuracy	0.833333	10
1216	Shogun (Broad)	Accuracy	0.833333	10
1217	Shogun (Broad)	Accuracy	0.733333	10
1218	Shogun (Broad)	Accuracy	0.866667	10
1219	Shogun (Broad)	Accuracy	0.766667	10
1220	Shogun (Broad)	Accuracy	0.833333	10
1221	Shogun (Broad)	Accuracy	0.866667	15
1222	Shogun (Broad)	Accuracy	0.844444	15
1223	Shogun (Broad)	Accuracy	0.888889	15
1224	Shogun (Broad)	Accuracy	0.888889	15
1225	Shogun (Broad)	Accuracy	0.844444	15
1226	Shogun (Broad)	Accuracy	0.888889	15
1227	Shogun (Broad)	Accuracy	0.866667	15
1228	Shogun (Broad)	Accuracy	0.933333	15
1229	Shogun (Broad)	Accuracy	0.844444	15
1230	Shogun (Broad)	Accuracy	0.911111	15
1231	Shogun (Broad)	Accuracy	0.842105	20
1232	Shogun (Broad)	Accuracy	0.912281	20
1233	Shogun (Broad)	Accuracy	0.912281	20
1234	Shogun (Broad)	Accuracy	0.929825	20
1235	Shogun (Broad)	Accuracy	0.929825	20
1236	Shogun (Broad)	Accuracy	0.894737	20
1237	Shogun (Broad)	Accuracy	0.929825	20
1238	Shogun (Broad)	Accuracy	0.842105	20
1239	Shogun (Broad)	Accuracy	0.929825	20
1240	Shogun (Broad)	Accuracy	0.894737	20
1241	Shogun (Broad)	Accuracy	0.910448	25
1242	Shogun (Broad)	Accuracy	0.880597	25
1243	Shogun (Broad)	Accuracy	0.895522	25
1244	Shogun (Broad)	Accuracy	0.880597	25
1245	Shogun (Broad)	Accuracy	0.910448	25
1246	Shogun (Broad)	Accuracy	0.910448	25
1247	Shogun (Broad)	Accuracy	0.910448	25
1248	Shogun (Broad)	Accuracy	0.865672	25
1249	Shogun (Broad)	Accuracy	0.925373	25
1250	Shogun (Broad)	Accuracy	0.925373	25
1251	Shogun (Broad)	Accuracy	0.909091	30
1252	Shogun (Broad)	Accuracy	0.922078	30
1253	Shogun (Broad)	Accuracy	0.909091	30
1254	Shogun (Broad)	Accuracy	0.935065	30
1255	Shogun (Broad)	Accuracy	0.935065	30
1256	Shogun (Broad)	Accuracy	0.896104	30
1257	Shogun (Broad)	Accuracy	0.909091	30
1258	Shogun (Broad)	Accuracy	0.896104	30
1259	Shogun (Broad)	Accuracy	0.909091	30
1260	Shogun (Broad)	Accuracy	0.935065	30
1261	Shogun (Broad)	Accuracy	0.954023	35
1262	Shogun (Broad)	Accuracy	0.931034	35
1263	Shogun (Broad)	Accuracy	0.942529	35
1264	Shogun (Broad)	Accuracy	0.931034	35
1265	Shogun (Broad)	Accuracy	0.931034	35
1266	Shogun (Broad)	Accuracy	0.908046	35
1267	Shogun (Broad)	Accuracy	0.91954	35
1268	Shogun (Broad)	Accuracy	0.908046	35
1269	Shogun (Broad)	Accuracy	0.91954	35
1270	Shogun (Broad)	Accuracy	0.91954	35
1271	Shogun (Broad)	Accuracy	0.935484	40
1272	Shogun (Broad)	Accuracy	0.946237	40
1273	Shogun (Broad)	Accuracy	0.924731	40
1274	Shogun (Broad)	Accuracy	0.924731	40
1275	Shogun (Broad)	Accuracy	0.946237	40
1276	Shogun (Broad)	Accuracy	0.913978	40
1277	Shogun (Broad)	Accuracy	0.935484	40
1278	Shogun (Broad)	Accuracy	0.935484	40
1279	Shogun (Broad)	Accuracy	0.924731	40
1280	Shogun (Broad)	Accuracy	0.924731	40
1281	Kraken (HMS)	Kappa	1	5
1282	Kraken (HMS)	Kappa	0.5	5
1283	Kraken (HMS)	Kappa	0.5	5
1284	Kraken (HMS)	Kappa	0.8	5
1285	Kraken (HMS)	Kappa	0.2	5
1286	Kraken (HMS)	Kappa	0.3	5
1287	Kraken (HMS)	Kappa	0.5	5
1288	Kraken (HMS)	Kappa	0.4	5
1289	Kraken (HMS)	Kappa	0.3	5
1290	Kraken (HMS)	Kappa	0.6	5
1291	Kraken (HMS)	Kappa	0.9	10
1292	Kraken (HMS)	Kappa	0.9	10
1293	Kraken (HMS)	Kappa	0.8	10
1294	Kraken (HMS)	Kappa	0.85	10
1295	Kraken (HMS)	Kappa	0.8	10
1296	Kraken (HMS)	Kappa	0.9	10
1297	Kraken (HMS)	Kappa	0.85	10
1298	Kraken (HMS)	Kappa	0.85	10
1299	Kraken (HMS)	Kappa	0.85	10
1300	Kraken (HMS)	Kappa	0.75	10
1301	Kraken (HMS)	Kappa	0.9	15
1302	Kraken (HMS)	Kappa	0.866667	15
1303	Kraken (HMS)	Kappa	0.9	15
1304	Kraken (HMS)	Kappa	0.833333	15
1305	Kraken (HMS)	Kappa	0.933333	15
1306	Kraken (HMS)	Kappa	0.933333	15
1307	Kraken (HMS)	Kappa	0.833333	15
1308	Kraken (HMS)	Kappa	0.933333	15
1309	Kraken (HMS)	Kappa	0.866667	15
1310	Kraken (HMS)	Kappa	0.966667	15
1311	Kraken (HMS)	Kappa	0.825	20
1312	Kraken (HMS)	Kappa	0.85	20
1313	Kraken (HMS)	Kappa	0.975	20
1314	Kraken (HMS)	Kappa	0.975	20
1315	Kraken (HMS)	Kappa	0.875	20
1316	Kraken (HMS)	Kappa	0.95	20
1317	Kraken (HMS)	Kappa	0.925	20
1318	Kraken (HMS)	Kappa	0.95	20
1319	Kraken (HMS)	Kappa	0.925	20
1320	Kraken (HMS)	Kappa	0.875	20
1321	Kraken (HMS)	Kappa	0.96	25
1322	Kraken (HMS)	Kappa	0.94	25
1323	Kraken (HMS)	Kappa	0.96	25
1324	Kraken (HMS)	Kappa	0.92	25
1325	Kraken (HMS)	Kappa	0.94	25
1326	Kraken (HMS)	Kappa	0.96	25
1327	Kraken (HMS)	Kappa	0.94	25
1328	Kraken (HMS)	Kappa	0.96	25
1329	Kraken (HMS)	Kappa	0.92	25
1330	Kraken (HMS)	Kappa	0.98	25
1331	Kraken (HMS)	Kappa	0.95	30
1332	Kraken (HMS)	Kappa	0.933333	30
1333	Kraken (HMS)	Kappa	0.966667	30
1334	Kraken (HMS)	Kappa	0.9	30
1335	Kraken (HMS)	Kappa	0.95	30
1336	Kraken (HMS)	Kappa	0.95	30
1337	Kraken (HMS)	Kappa	0.883333	30
1338	Kraken (HMS)	Kappa	0.983333	30
1339	Kraken (HMS)	Kappa	0.933333	30
1340	Kraken (HMS)	Kappa	0.983333	30
1341	Kraken (HMS)	Kappa	0.971429	35
1342	Kraken (HMS)	Kappa	0.971429	35
1343	Kraken (HMS)	Kappa	0.957143	35
1344	Kraken (HMS)	Kappa	0.942857	35
1345	Kraken (HMS)	Kappa	0.985714	35
1346	Kraken (HMS)	Kappa	0.957143	35
1347	Kraken (HMS)	Kappa	0.957143	35
1348	Kraken (HMS)	Kappa	0.971429	35
1349	Kraken (HMS)	Kappa	0.928571	35
1350	Kraken (HMS)	Kappa	0.957143	35
1351	Kraken (HMS)	Kappa	0.95	40
1352	Kraken (HMS)	Kappa	0.9875	40
1353	Kraken (HMS)	Kappa	0.975	40
1354	Kraken (HMS)	Kappa	0.975	40
1355	Kraken (HMS)	Kappa	0.9375	40
1356	Kraken (HMS)	Kappa	0.925	40
1357	Kraken (HMS)	Kappa	0.9625	40
1358	Kraken (HMS)	Kappa	0.95	40
1359	Kraken (HMS)	Kappa	1	40
1360	Kraken (HMS)	Kappa	0.9625	40
1361	Kraken (Broad)	Kappa	0.3	5
1362	Kraken (Broad)	Kappa	0.7	5
1363	Kraken (Broad)	Kappa	0.5	5
1364	Kraken (Broad)	Kappa	0.6	5
1365	Kraken (Broad)	Kappa	0.8	5
1366	Kraken (Broad)	Kappa	0.9	5
1367	Kraken (Broad)	Kappa	1	5
1368	Kraken (Broad)	Kappa	0.6	5
1369	Kraken (Broad)	Kappa	0.7	5
1370	Kraken (Broad)	Kappa	0.4	5
1371	Kraken (Broad)	Kappa	0.9	10
1372	Kraken (Broad)	Kappa	0.75	10
1373	Kraken (Broad)	Kappa	0.85	10
1374	Kraken (Broad)	Kappa	0.75	10
1375	Kraken (Broad)	Kappa	0.75	10
1376	Kraken (Broad)	Kappa	0.9	10
1377	Kraken (Broad)	Kappa	1	10
1378	Kraken (Broad)	Kappa	0.9	10
1379	Kraken (Broad)	Kappa	0.9	10
1380	Kraken (Broad)	Kappa	0.9	10
1381	Kraken (Broad)	Kappa	0.833333	15
1382	Kraken (Broad)	Kappa	0.866667	15
1383	Kraken (Broad)	Kappa	0.933333	15
1384	Kraken (Broad)	Kappa	0.866667	15
1385	Kraken (Broad)	Kappa	0.933333	15
1386	Kraken (Broad)	Kappa	0.933333	15
1387	Kraken (Broad)	Kappa	0.833333	15
1388	Kraken (Broad)	Kappa	0.9	15
1389	Kraken (Broad)	Kappa	0.833333	15
1390	Kraken (Broad)	Kappa	0.933333	15
1391	Kraken (Broad)	Kappa	0.973574	20
1392	Kraken (Broad)	Kappa	0.868421	20
1393	Kraken (Broad)	Kappa	0.894444	20
1394	Kraken (Broad)	Kappa	0.947222	20
1395	Kraken (Broad)	Kappa	0.894444	20
1396	Kraken (Broad)	Kappa	0.947295	20
1397	Kraken (Broad)	Kappa	0.973648	20
1398	Kraken (Broad)	Kappa	0.920833	20
1399	Kraken (Broad)	Kappa	0.841667	20
1400	Kraken (Broad)	Kappa	0.815278	20
1401	Kraken (Broad)	Kappa	0.864097	25
1402	Kraken (Broad)	Kappa	0.886441	25
1403	Kraken (Broad)	Kappa	0.885821	25
1404	Kraken (Broad)	Kappa	0.886748	25
1405	Kraken (Broad)	Kappa	0.841017	25
1406	Kraken (Broad)	Kappa	0.909398	25
1407	Kraken (Broad)	Kappa	0.863358	25
1408	Kraken (Broad)	Kappa	0.932049	25
1409	Kraken (Broad)	Kappa	0.909643	25
1410	Kraken (Broad)	Kappa	0.863729	25
1411	Kraken (Broad)	Kappa	0.879687	30
1412	Kraken (Broad)	Kappa	0.919519	30
1413	Kraken (Broad)	Kappa	0.839038	30
1414	Kraken (Broad)	Kappa	0.839583	30
1415	Kraken (Broad)	Kappa	0.879279	30
1416	Kraken (Broad)	Kappa	0.919245	30
1417	Kraken (Broad)	Kappa	0.879279	30
1418	Kraken (Broad)	Kappa	0.939434	30
1419	Kraken (Broad)	Kappa	0.95976	30
1420	Kraken (Broad)	Kappa	0.939844	30
1421	Kraken (Broad)	Kappa	0.909601	35
1422	Kraken (Broad)	Kappa	0.927681	35
1423	Kraken (Broad)	Kappa	0.872966	35
1424	Kraken (Broad)	Kappa	0.909601	35
1425	Kraken (Broad)	Kappa	0.837282	35
1426	Kraken (Broad)	Kappa	0.891521	35
1427	Kraken (Broad)	Kappa	0.891114	35
1428	Kraken (Broad)	Kappa	0.945557	35
1429	Kraken (Broad)	Kappa	0.909938	35
1430	Kraken (Broad)	Kappa	0.891925	35
1431	Kraken (Broad)	Kappa	0.917108	40
1432	Kraken (Broad)	Kappa	0.867892	40
1433	Kraken (Broad)	Kappa	0.917755	40
1434	Kraken (Broad)	Kappa	0.884857	40
1435	Kraken (Broad)	Kappa	0.883951	40
1436	Kraken (Broad)	Kappa	0.917755	40
1437	Kraken (Broad)	Kappa	0.884406	40
1438	Kraken (Broad)	Kappa	0.884857	40
1439	Kraken (Broad)	Kappa	0.901689	40
1440	Kraken (Broad)	Kappa	0.917433	40
1441	Shogun (HMS)	Kappa	0.9	5
1442	Shogun (HMS)	Kappa	0.6	5
1443	Shogun (HMS)	Kappa	0.9	5
1444	Shogun (HMS)	Kappa	0.7	5
1445	Shogun (HMS)	Kappa	0.6	5
1446	Shogun (HMS)	Kappa	0.7	5
1447	Shogun (HMS)	Kappa	0.3	5
1448	Shogun (HMS)	Kappa	0.9	5
1449	Shogun (HMS)	Kappa	0.9	5
1450	Shogun (HMS)	Kappa	0.8	5
1451	Shogun (HMS)	Kappa	0.75	10
1452	Shogun (HMS)	Kappa	0.8	10
1453	Shogun (HMS)	Kappa	0.9	10
1454	Shogun (HMS)	Kappa	0.85	10
1455	Shogun (HMS)	Kappa	0.9	10
1456	Shogun (HMS)	Kappa	0.75	10
1457	Shogun (HMS)	Kappa	0.7	10
1458	Shogun (HMS)	Kappa	0.7	10
1459	Shogun (HMS)	Kappa	0.85	10
1460	Shogun (HMS)	Kappa	0.85	10
1461	Shogun (HMS)	Kappa	0.833333	15
1462	Shogun (HMS)	Kappa	0.8	15
1463	Shogun (HMS)	Kappa	0.9	15
1464	Shogun (HMS)	Kappa	0.866667	15
1465	Shogun (HMS)	Kappa	0.866667	15
1466	Shogun (HMS)	Kappa	0.9	15
1467	Shogun (HMS)	Kappa	0.866667	15
1468	Shogun (HMS)	Kappa	0.9	15
1469	Shogun (HMS)	Kappa	0.733333	15
1470	Shogun (HMS)	Kappa	0.833333	15
1471	Shogun (HMS)	Kappa	0.85	20
1472	Shogun (HMS)	Kappa	0.8	20
1473	Shogun (HMS)	Kappa	0.975	20
1474	Shogun (HMS)	Kappa	0.875	20
1475	Shogun (HMS)	Kappa	0.95	20
1476	Shogun (HMS)	Kappa	0.9	20
1477	Shogun (HMS)	Kappa	0.8	20
1478	Shogun (HMS)	Kappa	0.95	20
1479	Shogun (HMS)	Kappa	0.975	20
1480	Shogun (HMS)	Kappa	0.875	20
1481	Shogun (HMS)	Kappa	0.92	25
1482	Shogun (HMS)	Kappa	0.92	25
1483	Shogun (HMS)	Kappa	0.94	25
1484	Shogun (HMS)	Kappa	0.96	25
1485	Shogun (HMS)	Kappa	0.94	25
1486	Shogun (HMS)	Kappa	0.94	25
1487	Shogun (HMS)	Kappa	0.9	25
1488	Shogun (HMS)	Kappa	0.9	25
1489	Shogun (HMS)	Kappa	0.96	25
1490	Shogun (HMS)	Kappa	0.92	25
1491	Shogun (HMS)	Kappa	1	30
1492	Shogun (HMS)	Kappa	0.933333	30
1493	Shogun (HMS)	Kappa	0.9	30
1494	Shogun (HMS)	Kappa	0.95	30
1495	Shogun (HMS)	Kappa	0.933333	30
1496	Shogun (HMS)	Kappa	0.95	30
1497	Shogun (HMS)	Kappa	0.883333	30
1498	Shogun (HMS)	Kappa	0.866667	30
1499	Shogun (HMS)	Kappa	0.933333	30
1500	Shogun (HMS)	Kappa	0.933333	30
1501	Shogun (HMS)	Kappa	0.957143	35
1502	Shogun (HMS)	Kappa	0.928571	35
1503	Shogun (HMS)	Kappa	0.914286	35
1504	Shogun (HMS)	Kappa	0.957143	35
1505	Shogun (HMS)	Kappa	0.928571	35
1506	Shogun (HMS)	Kappa	0.957143	35
1507	Shogun (HMS)	Kappa	0.942857	35
1508	Shogun (HMS)	Kappa	0.942857	35
1509	Shogun (HMS)	Kappa	0.942857	35
1510	Shogun (HMS)	Kappa	0.928571	35
1511	Shogun (HMS)	Kappa	0.975	40
1512	Shogun (HMS)	Kappa	0.9375	40
1513	Shogun (HMS)	Kappa	0.925	40
1514	Shogun (HMS)	Kappa	0.9625	40
1515	Shogun (HMS)	Kappa	0.975	40
1516	Shogun (HMS)	Kappa	0.9375	40
1517	Shogun (HMS)	Kappa	0.975	40
1518	Shogun (HMS)	Kappa	0.9625	40
1519	Shogun (HMS)	Kappa	0.9625	40
1520	Shogun (HMS)	Kappa	0.975	40
1521	Shogun (Broad)	Kappa	0.7	5
1522	Shogun (Broad)	Kappa	0.4	5
1523	Shogun (Broad)	Kappa	0.7	5
1524	Shogun (Broad)	Kappa	0.4	5
1525	Shogun (Broad)	Kappa	0.7	5
1526	Shogun (Broad)	Kappa	0.6	5
1527	Shogun (Broad)	Kappa	0.4	5
1528	Shogun (Broad)	Kappa	0.5	5
1529	Shogun (Broad)	Kappa	0.2	5
1530	Shogun (Broad)	Kappa	0.6	5
1531	Shogun (Broad)	Kappa	0.85	10
1532	Shogun (Broad)	Kappa	0.65	10
1533	Shogun (Broad)	Kappa	0.65	10
1534	Shogun (Broad)	Kappa	0.8	10
1535	Shogun (Broad)	Kappa	0.75	10
1536	Shogun (Broad)	Kappa	0.75	10
1537	Shogun (Broad)	Kappa	0.6	10
1538	Shogun (Broad)	Kappa	0.8	10
1539	Shogun (Broad)	Kappa	0.65	10
1540	Shogun (Broad)	Kappa	0.75	10
1541	Shogun (Broad)	Kappa	0.8	15
1542	Shogun (Broad)	Kappa	0.766667	15
1543	Shogun (Broad)	Kappa	0.833333	15
1544	Shogun (Broad)	Kappa	0.833333	15
1545	Shogun (Broad)	Kappa	0.766667	15
1546	Shogun (Broad)	Kappa	0.833333	15
1547	Shogun (Broad)	Kappa	0.8	15
1548	Shogun (Broad)	Kappa	0.9	15
1549	Shogun (Broad)	Kappa	0.766667	15
1550	Shogun (Broad)	Kappa	0.866667	15
1551	Shogun (Broad)	Kappa	0.764138	20
1552	Shogun (Broad)	Kappa	0.868603	20
1553	Shogun (Broad)	Kappa	0.868603	20
1554	Shogun (Broad)	Kappa	0.894444	20
1555	Shogun (Broad)	Kappa	0.894737	20
1556	Shogun (Broad)	Kappa	0.842324	20
1557	Shogun (Broad)	Kappa	0.894737	20
1558	Shogun (Broad)	Kappa	0.763485	20
1559	Shogun (Broad)	Kappa	0.894737	20
1560	Shogun (Broad)	Kappa	0.841667	20
1561	Shogun (Broad)	Kappa	0.864829	25
1562	Shogun (Broad)	Kappa	0.819285	25
1563	Shogun (Broad)	Kappa	0.842723	25
1564	Shogun (Broad)	Kappa	0.819285	25
1565	Shogun (Broad)	Kappa	0.864829	25
1566	Shogun (Broad)	Kappa	0.864464	25
1567	Shogun (Broad)	Kappa	0.864829	25
1568	Shogun (Broad)	Kappa	0.798866	25
1569	Shogun (Broad)	Kappa	0.887053	25
1570	Shogun (Broad)	Kappa	0.887357	25
1571	Shogun (Broad)	Kappa	0.860579	30
1572	Shogun (Broad)	Kappa	0.879687	30
1573	Shogun (Broad)	Kappa	0.860579	30
1574	Shogun (Broad)	Kappa	0.900078	30
1575	Shogun (Broad)	Kappa	0.900748	30
1576	Shogun (Broad)	Kappa	0.840662	30
1577	Shogun (Broad)	Kappa	0.861047	30
1578	Shogun (Broad)	Kappa	0.841727	30
1579	Shogun (Broad)	Kappa	0.861047	30
1580	Shogun (Broad)	Kappa	0.900078	30
1581	Shogun (Broad)	Kappa	0.92795	35
1582	Shogun (Broad)	Kappa	0.892725	35
1583	Shogun (Broad)	Kappa	0.910604	35
1584	Shogun (Broad)	Kappa	0.892725	35
1585	Shogun (Broad)	Kappa	0.89312	35
1586	Shogun (Broad)	Kappa	0.858017	35
1587	Shogun (Broad)	Kappa	0.875307	35
1588	Shogun (Broad)	Kappa	0.857494	35
1589	Shogun (Broad)	Kappa	0.875307	35
1590	Shogun (Broad)	Kappa	0.875307	35
1591	Shogun (Broad)	Kappa	0.898803	40
1592	Shogun (Broad)	Kappa	0.915022	40
1593	Shogun (Broad)	Kappa	0.882406	40
1594	Shogun (Broad)	Kappa	0.882406	40
1595	Shogun (Broad)	Kappa	0.915331	40
1596	Shogun (Broad)	Kappa	0.866139	40
1597	Shogun (Broad)	Kappa	0.898803	40
1598	Shogun (Broad)	Kappa	0.898803	40
1599	Shogun (Broad)	Kappa	0.881464	40
1600	Shogun (Broad)	Kappa	0.88198	40
1601	Kraken (HMS)	Mean F1	1	5
1602	Kraken (HMS)	Mean F1	0.664646	5
1603	Kraken (HMS)	Mean F1	0.67735	5
1604	Kraken (HMS)	Mean F1	0.865993	5
1605	Kraken (HMS)	Mean F1	0.4633	5
1606	Kraken (HMS)	Mean F1	0.516498	5
1607	Kraken (HMS)	Mean F1	0.670707	5
1608	Kraken (HMS)	Mean F1	0.571429	5
1609	Kraken (HMS)	Mean F1	0.523906	5
1610	Kraken (HMS)	Mean F1	0.727778	5
1611	Kraken (HMS)	Mean F1	0.93325	10
1612	Kraken (HMS)	Mean F1	0.931217	10
1613	Kraken (HMS)	Mean F1	0.86817	10
1614	Kraken (HMS)	Mean F1	0.898162	10
1615	Kraken (HMS)	Mean F1	0.864829	10
1616	Kraken (HMS)	Mean F1	0.934609	10
1617	Kraken (HMS)	Mean F1	0.901941	10
1618	Kraken (HMS)	Mean F1	0.899749	10
1619	Kraken (HMS)	Mean F1	0.899749	10
1620	Kraken (HMS)	Mean F1	0.831987	10
1621	Kraken (HMS)	Mean F1	0.934393	15
1622	Kraken (HMS)	Mean F1	0.911803	15
1623	Kraken (HMS)	Mean F1	0.934025	15
1624	Kraken (HMS)	Mean F1	0.886157	15
1625	Kraken (HMS)	Mean F1	0.955531	15
1626	Kraken (HMS)	Mean F1	0.955357	15
1627	Kraken (HMS)	Mean F1	0.888048	15
1628	Kraken (HMS)	Mean F1	0.956178	15
1629	Kraken (HMS)	Mean F1	0.90937	15
1630	Kraken (HMS)	Mean F1	0.977753	15
1631	Kraken (HMS)	Mean F1	0.884005	20
1632	Kraken (HMS)	Mean F1	0.899948	20
1633	Kraken (HMS)	Mean F1	0.983323	20
1634	Kraken (HMS)	Mean F1	0.983323	20
1635	Kraken (HMS)	Mean F1	0.916208	20
1636	Kraken (HMS)	Mean F1	0.966667	20
1637	Kraken (HMS)	Mean F1	0.950653	20
1638	Kraken (HMS)	Mean F1	0.966667	20
1639	Kraken (HMS)	Mean F1	0.949969	20
1640	Kraken (HMS)	Mean F1	0.917042	20
1641	Kraken (HMS)	Mean F1	0.973333	25
1642	Kraken (HMS)	Mean F1	0.960256	25
1643	Kraken (HMS)	Mean F1	0.973574	25
1644	Kraken (HMS)	Mean F1	0.947148	25
1645	Kraken (HMS)	Mean F1	0.960256	25
1646	Kraken (HMS)	Mean F1	0.973328	25
1647	Kraken (HMS)	Mean F1	0.959984	25
1648	Kraken (HMS)	Mean F1	0.973291	25
1649	Kraken (HMS)	Mean F1	0.946923	25
1650	Kraken (HMS)	Mean F1	0.986661	25
1651	Kraken (HMS)	Mean F1	0.966983	30
1652	Kraken (HMS)	Mean F1	0.955896	30
1653	Kraken (HMS)	Mean F1	0.977778	30
1654	Kraken (HMS)	Mean F1	0.932901	30
1655	Kraken (HMS)	Mean F1	0.966657	30
1656	Kraken (HMS)	Mean F1	0.966657	30
1657	Kraken (HMS)	Mean F1	0.923025	30
1658	Kraken (HMS)	Mean F1	0.988886	30
1659	Kraken (HMS)	Mean F1	0.955546	30
1660	Kraken (HMS)	Mean F1	0.988886	30
1661	Kraken (HMS)	Mean F1	0.980952	35
1662	Kraken (HMS)	Mean F1	0.981079	35
1663	Kraken (HMS)	Mean F1	0.971561	35
1664	Kraken (HMS)	Mean F1	0.962158	35
1665	Kraken (HMS)	Mean F1	0.990474	35
1666	Kraken (HMS)	Mean F1	0.971121	35
1667	Kraken (HMS)	Mean F1	0.971121	35
1668	Kraken (HMS)	Mean F1	0.98095	35
1669	Kraken (HMS)	Mean F1	0.95257	35
1670	Kraken (HMS)	Mean F1	0.971289	35
1671	Kraken (HMS)	Mean F1	0.966445	40
1672	Kraken (HMS)	Mean F1	0.991665	40
1673	Kraken (HMS)	Mean F1	0.983332	40
1674	Kraken (HMS)	Mean F1	0.983332	40
1675	Kraken (HMS)	Mean F1	0.958423	40
1676	Kraken (HMS)	Mean F1	0.95	40
1677	Kraken (HMS)	Mean F1	0.975102	40
1678	Kraken (HMS)	Mean F1	0.966445	40
1679	Kraken (HMS)	Mean F1	1	40
1680	Kraken (HMS)	Mean F1	0.975102	40
1681	Kraken (Broad)	Mean F1	0.505556	5
1682	Kraken (Broad)	Mean F1	0.796296	5
1683	Kraken (Broad)	Mean F1	0.670707	5
1684	Kraken (Broad)	Mean F1	0.731313	5
1685	Kraken (Broad)	Mean F1	0.856061	5
1686	Kraken (Broad)	Mean F1	0.93266	5
1687	Kraken (Broad)	Mean F1	1	5
1688	Kraken (Broad)	Mean F1	0.731313	5
1689	Kraken (Broad)	Mean F1	0.771284	5
1690	Kraken (Broad)	Mean F1	0.590572	5
1691	Kraken (Broad)	Mean F1	0.93325	10
1692	Kraken (Broad)	Mean F1	0.835918	10
1693	Kraken (Broad)	Mean F1	0.898162	10
1694	Kraken (Broad)	Mean F1	0.825149	10
1695	Kraken (Broad)	Mean F1	0.83467	10
1696	Kraken (Broad)	Mean F1	0.93266	10
1697	Kraken (Broad)	Mean F1	1	10
1698	Kraken (Broad)	Mean F1	0.931217	10
1699	Kraken (Broad)	Mean F1	0.93325	10
1700	Kraken (Broad)	Mean F1	0.934609	10
1701	Kraken (Broad)	Mean F1	0.888492	15
1702	Kraken (Broad)	Mean F1	0.911803	15
1703	Kraken (Broad)	Mean F1	0.955357	15
1704	Kraken (Broad)	Mean F1	0.912356	15
1705	Kraken (Broad)	Mean F1	0.955556	15
1706	Kraken (Broad)	Mean F1	0.955556	15
1707	Kraken (Broad)	Mean F1	0.888815	15
1708	Kraken (Broad)	Mean F1	0.933259	15
1709	Kraken (Broad)	Mean F1	0.889368	15
1710	Kraken (Broad)	Mean F1	0.955531	15
1711	Kraken (Broad)	Mean F1	0.981769	20
1712	Kraken (Broad)	Mean F1	0.909788	20
1713	Kraken (Broad)	Mean F1	0.930361	20
1714	Kraken (Broad)	Mean F1	0.963725	20
1715	Kraken (Broad)	Mean F1	0.929431	20
1716	Kraken (Broad)	Mean F1	0.964802	20
1717	Kraken (Broad)	Mean F1	0.981929	20
1718	Kraken (Broad)	Mean F1	0.947059	20
1719	Kraken (Broad)	Mean F1	0.893444	20
1720	Kraken (Broad)	Mean F1	0.878233	20
1721	Kraken (Broad)	Mean F1	0.9097	25
1722	Kraken (Broad)	Mean F1	0.920186	25
1723	Kraken (Broad)	Mean F1	0.919057	25
1724	Kraken (Broad)	Mean F1	0.92486	25
1725	Kraken (Broad)	Mean F1	0.887555	25
1726	Kraken (Broad)	Mean F1	0.937959	25
1727	Kraken (Broad)	Mean F1	0.910042	25
1728	Kraken (Broad)	Mean F1	0.951293	25
1729	Kraken (Broad)	Mean F1	0.93515	25
1730	Kraken (Broad)	Mean F1	0.906455	25
1731	Kraken (Broad)	Mean F1	0.916142	30
1732	Kraken (Broad)	Mean F1	0.941995	30
1733	Kraken (Broad)	Mean F1	0.897265	30
1734	Kraken (Broad)	Mean F1	0.893394	30
1735	Kraken (Broad)	Mean F1	0.920253	30
1736	Kraken (Broad)	Mean F1	0.93647	30
1737	Kraken (Broad)	Mean F1	0.910633	30
1738	Kraken (Broad)	Mean F1	0.957303	30
1739	Kraken (Broad)	Mean F1	0.973323	30
1740	Kraken (Broad)	Mean F1	0.95817	30
1741	Kraken (Broad)	Mean F1	0.936565	35
1742	Kraken (Broad)	Mean F1	0.945945	35
1743	Kraken (Broad)	Mean F1	0.911348	35
1744	Kraken (Broad)	Mean F1	0.936565	35
1745	Kraken (Broad)	Mean F1	0.887642	35
1746	Kraken (Broad)	Mean F1	0.927024	35
1747	Kraken (Broad)	Mean F1	0.920767	35
1748	Kraken (Broad)	Mean F1	0.960384	35
1749	Kraken (Broad)	Mean F1	0.932462	35
1750	Kraken (Broad)	Mean F1	0.922545	35
1751	Kraken (Broad)	Mean F1	0.939136	40
1752	Kraken (Broad)	Mean F1	0.908943	40
1753	Kraken (Broad)	Mean F1	0.940685	40
1754	Kraken (Broad)	Mean F1	0.924242	40
1755	Kraken (Broad)	Mean F1	0.909188	40
1756	Kraken (Broad)	Mean F1	0.940685	40
1757	Kraken (Broad)	Mean F1	0.917156	40
1758	Kraken (Broad)	Mean F1	0.923976	40
1759	Kraken (Broad)	Mean F1	0.927451	40
1760	Kraken (Broad)	Mean F1	0.94624	40
1761	Shogun (HMS)	Mean F1	0.93266	5
1762	Shogun (HMS)	Mean F1	0.710678	5
1763	Shogun (HMS)	Mean F1	0.93266	5
1764	Shogun (HMS)	Mean F1	0.78022	5
1765	Shogun (HMS)	Mean F1	0.722222	5
1766	Shogun (HMS)	Mean F1	0.791919	5
1767	Shogun (HMS)	Mean F1	0.543434	5
1768	Shogun (HMS)	Mean F1	0.93266	5
1769	Shogun (HMS)	Mean F1	0.93266	5
1770	Shogun (HMS)	Mean F1	0.865993	5
1771	Shogun (HMS)	Mean F1	0.828956	10
1772	Shogun (HMS)	Mean F1	0.861111	10
1773	Shogun (HMS)	Mean F1	0.934609	10
1774	Shogun (HMS)	Mean F1	0.901504	10
1775	Shogun (HMS)	Mean F1	0.93266	10
1776	Shogun (HMS)	Mean F1	0.831987	10
1777	Shogun (HMS)	Mean F1	0.798653	10
1778	Shogun (HMS)	Mean F1	0.798653	10
1779	Shogun (HMS)	Mean F1	0.899471	10
1780	Shogun (HMS)	Mean F1	0.895	10
1781	Shogun (HMS)	Mean F1	0.888492	15
1782	Shogun (HMS)	Mean F1	0.866593	15
1783	Shogun (HMS)	Mean F1	0.934025	15
1784	Shogun (HMS)	Mean F1	0.911037	15
1785	Shogun (HMS)	Mean F1	0.907662	15
1786	Shogun (HMS)	Mean F1	0.93266	15
1787	Shogun (HMS)	Mean F1	0.911037	15
1788	Shogun (HMS)	Mean F1	0.934393	15
1789	Shogun (HMS)	Mean F1	0.8211	15
1790	Shogun (HMS)	Mean F1	0.888815	15
1791	Shogun (HMS)	Mean F1	0.899969	20
1792	Shogun (HMS)	Mean F1	0.867042	20
1793	Shogun (HMS)	Mean F1	0.983323	20
1794	Shogun (HMS)	Mean F1	0.916208	20
1795	Shogun (HMS)	Mean F1	0.966583	20
1796	Shogun (HMS)	Mean F1	0.931577	20
1797	Shogun (HMS)	Mean F1	0.86229	20
1798	Shogun (HMS)	Mean F1	0.966667	20
1799	Shogun (HMS)	Mean F1	0.983323	20
1800	Shogun (HMS)	Mean F1	0.917415	20
1801	Shogun (HMS)	Mean F1	0.946389	25
1802	Shogun (HMS)	Mean F1	0.946389	25
1803	Shogun (HMS)	Mean F1	0.959984	25
1804	Shogun (HMS)	Mean F1	0.973291	25
1805	Shogun (HMS)	Mean F1	0.960256	25
1806	Shogun (HMS)	Mean F1	0.959723	25
1807	Shogun (HMS)	Mean F1	0.933579	25
1808	Shogun (HMS)	Mean F1	0.932362	25
1809	Shogun (HMS)	Mean F1	0.973328	25
1810	Shogun (HMS)	Mean F1	0.947148	25
1811	Shogun (HMS)	Mean F1	1	30
1812	Shogun (HMS)	Mean F1	0.955531	30
1813	Shogun (HMS)	Mean F1	0.933861	30
1814	Shogun (HMS)	Mean F1	0.966846	30
1815	Shogun (HMS)	Mean F1	0.955154	30
1816	Shogun (HMS)	Mean F1	0.966657	30
1817	Shogun (HMS)	Mean F1	0.922018	30
1818	Shogun (HMS)	Mean F1	0.911062	30
1819	Shogun (HMS)	Mean F1	0.955896	30
1820	Shogun (HMS)	Mean F1	0.955148	30
1821	Shogun (HMS)	Mean F1	0.971121	35
1822	Shogun (HMS)	Mean F1	0.952509	35
1823	Shogun (HMS)	Mean F1	0.942857	35
1824	Shogun (HMS)	Mean F1	0.971561	35
1825	Shogun (HMS)	Mean F1	0.952509	35
1826	Shogun (HMS)	Mean F1	0.971289	35
1827	Shogun (HMS)	Mean F1	0.962158	35
1828	Shogun (HMS)	Mean F1	0.961765	35
1829	Shogun (HMS)	Mean F1	0.961613	35
1830	Shogun (HMS)	Mean F1	0.952872	35
1831	Shogun (HMS)	Mean F1	0.983332	40
1832	Shogun (HMS)	Mean F1	0.958432	40
1833	Shogun (HMS)	Mean F1	0.949996	40
1834	Shogun (HMS)	Mean F1	0.974768	40
1835	Shogun (HMS)	Mean F1	0.983323	40
1836	Shogun (HMS)	Mean F1	0.958224	40
1837	Shogun (HMS)	Mean F1	0.983332	40
1838	Shogun (HMS)	Mean F1	0.974996	40
1839	Shogun (HMS)	Mean F1	0.974992	40
1840	Shogun (HMS)	Mean F1	0.983431	40
1841	Shogun (Broad)	Mean F1	0.802707	5
1842	Shogun (Broad)	Mean F1	0.590572	5
1843	Shogun (Broad)	Mean F1	0.805387	5
1844	Shogun (Broad)	Mean F1	0.60404	5
1845	Shogun (Broad)	Mean F1	0.791919	5
1846	Shogun (Broad)	Mean F1	0.738721	5
1847	Shogun (Broad)	Mean F1	0.596633	5
1848	Shogun (Broad)	Mean F1	0.655556	5
1849	Shogun (Broad)	Mean F1	0.46936	5
1850	Shogun (Broad)	Mean F1	0.733333	5
1851	Shogun (Broad)	Mean F1	0.901941	10
1852	Shogun (Broad)	Mean F1	0.768003	10
1853	Shogun (Broad)	Mean F1	0.761905	10
1854	Shogun (Broad)	Mean F1	0.869219	10
1855	Shogun (Broad)	Mean F1	0.832916	10
1856	Shogun (Broad)	Mean F1	0.835918	10
1857	Shogun (Broad)	Mean F1	0.729574	10
1858	Shogun (Broad)	Mean F1	0.869219	10
1859	Shogun (Broad)	Mean F1	0.764646	10
1860	Shogun (Broad)	Mean F1	0.834131	10
1861	Shogun (Broad)	Mean F1	0.860516	15
1862	Shogun (Broad)	Mean F1	0.844048	15
1863	Shogun (Broad)	Mean F1	0.885852	15
1864	Shogun (Broad)	Mean F1	0.887595	15
1865	Shogun (Broad)	Mean F1	0.843555	15
1866	Shogun (Broad)	Mean F1	0.890382	15
1867	Shogun (Broad)	Mean F1	0.868214	15
1868	Shogun (Broad)	Mean F1	0.934025	15
1869	Shogun (Broad)	Mean F1	0.847795	15
1870	Shogun (Broad)	Mean F1	0.912253	15
1871	Shogun (Broad)	Mean F1	0.840456	20
1872	Shogun (Broad)	Mean F1	0.90991	20
1873	Shogun (Broad)	Mean F1	0.91177	20
1874	Shogun (Broad)	Mean F1	0.930392	20
1875	Shogun (Broad)	Mean F1	0.927875	20
1876	Shogun (Broad)	Mean F1	0.893776	20
1877	Shogun (Broad)	Mean F1	0.927875	20
1878	Shogun (Broad)	Mean F1	0.839189	20
1879	Shogun (Broad)	Mean F1	0.927875	20
1880	Shogun (Broad)	Mean F1	0.896015	20
1881	Shogun (Broad)	Mean F1	0.904941	25
1882	Shogun (Broad)	Mean F1	0.876417	25
1883	Shogun (Broad)	Mean F1	0.891813	25
1884	Shogun (Broad)	Mean F1	0.875556	25
1885	Shogun (Broad)	Mean F1	0.906486	25
1886	Shogun (Broad)	Mean F1	0.909074	25
1887	Shogun (Broad)	Mean F1	0.906486	25
1888	Shogun (Broad)	Mean F1	0.862411	25
1889	Shogun (Broad)	Mean F1	0.922147	25
1890	Shogun (Broad)	Mean F1	0.919494	25
1891	Shogun (Broad)	Mean F1	0.905634	30
1892	Shogun (Broad)	Mean F1	0.91634	30
1893	Shogun (Broad)	Mean F1	0.905634	30
1894	Shogun (Broad)	Mean F1	0.932069	30
1895	Shogun (Broad)	Mean F1	0.925715	30
1896	Shogun (Broad)	Mean F1	0.887356	30
1897	Shogun (Broad)	Mean F1	0.902908	30
1898	Shogun (Broad)	Mean F1	0.888638	30
1899	Shogun (Broad)	Mean F1	0.902908	30
1900	Shogun (Broad)	Mean F1	0.924132	30
1901	Shogun (Broad)	Mean F1	0.951821	35
1902	Shogun (Broad)	Mean F1	0.924027	35
1903	Shogun (Broad)	Mean F1	0.933977	35
1904	Shogun (Broad)	Mean F1	0.924027	35
1905	Shogun (Broad)	Mean F1	0.920712	35
1906	Shogun (Broad)	Mean F1	0.897441	35
1907	Shogun (Broad)	Mean F1	0.910605	35
1908	Shogun (Broad)	Mean F1	0.900466	35
1909	Shogun (Broad)	Mean F1	0.910605	35
1910	Shogun (Broad)	Mean F1	0.910605	35
1911	Shogun (Broad)	Mean F1	0.927638	40
1912	Shogun (Broad)	Mean F1	0.945414	40
1913	Shogun (Broad)	Mean F1	0.914835	40
1914	Shogun (Broad)	Mean F1	0.914835	40
1915	Shogun (Broad)	Mean F1	0.940775	40
1916	Shogun (Broad)	Mean F1	0.902323	40
1917	Shogun (Broad)	Mean F1	0.927638	40
1918	Shogun (Broad)	Mean F1	0.927638	40
1919	Shogun (Broad)	Mean F1	0.913069	40
1920	Shogun (Broad)	Mean F1	0.918519	40
1921	Kraken (HMS)	Mean Sensitivity	1	5
1922	Kraken (HMS)	Mean Sensitivity	0.666667	5
1923	Kraken (HMS)	Mean Sensitivity	0.666667	5
1924	Kraken (HMS)	Mean Sensitivity	0.866667	5
1925	Kraken (HMS)	Mean Sensitivity	0.466667	5
1926	Kraken (HMS)	Mean Sensitivity	0.533333	5
1927	Kraken (HMS)	Mean Sensitivity	0.666667	5
1928	Kraken (HMS)	Mean Sensitivity	0.6	5
1929	Kraken (HMS)	Mean Sensitivity	0.533333	5
1930	Kraken (HMS)	Mean Sensitivity	0.733333	5
1931	Kraken (HMS)	Mean Sensitivity	0.933333	10
1932	Kraken (HMS)	Mean Sensitivity	0.933333	10
1933	Kraken (HMS)	Mean Sensitivity	0.866667	10
1934	Kraken (HMS)	Mean Sensitivity	0.9	10
1935	Kraken (HMS)	Mean Sensitivity	0.866667	10
1936	Kraken (HMS)	Mean Sensitivity	0.933333	10
1937	Kraken (HMS)	Mean Sensitivity	0.9	10
1938	Kraken (HMS)	Mean Sensitivity	0.9	10
1939	Kraken (HMS)	Mean Sensitivity	0.9	10
1940	Kraken (HMS)	Mean Sensitivity	0.833333	10
1941	Kraken (HMS)	Mean Sensitivity	0.933333	15
1942	Kraken (HMS)	Mean Sensitivity	0.911111	15
1943	Kraken (HMS)	Mean Sensitivity	0.933333	15
1944	Kraken (HMS)	Mean Sensitivity	0.888889	15
1945	Kraken (HMS)	Mean Sensitivity	0.955556	15
1946	Kraken (HMS)	Mean Sensitivity	0.955556	15
1947	Kraken (HMS)	Mean Sensitivity	0.888889	15
1948	Kraken (HMS)	Mean Sensitivity	0.955556	15
1949	Kraken (HMS)	Mean Sensitivity	0.911111	15
1950	Kraken (HMS)	Mean Sensitivity	0.977778	15
1951	Kraken (HMS)	Mean Sensitivity	0.883333	20
1952	Kraken (HMS)	Mean Sensitivity	0.9	20
1953	Kraken (HMS)	Mean Sensitivity	0.983333	20
1954	Kraken (HMS)	Mean Sensitivity	0.983333	20
1955	Kraken (HMS)	Mean Sensitivity	0.916667	20
1956	Kraken (HMS)	Mean Sensitivity	0.966667	20
1957	Kraken (HMS)	Mean Sensitivity	0.95	20
1958	Kraken (HMS)	Mean Sensitivity	0.966667	20
1959	Kraken (HMS)	Mean Sensitivity	0.95	20
1960	Kraken (HMS)	Mean Sensitivity	0.916667	20
1961	Kraken (HMS)	Mean Sensitivity	0.973333	25
1962	Kraken (HMS)	Mean Sensitivity	0.96	25
1963	Kraken (HMS)	Mean Sensitivity	0.973333	25
1964	Kraken (HMS)	Mean Sensitivity	0.946667	25
1965	Kraken (HMS)	Mean Sensitivity	0.96	25
1966	Kraken (HMS)	Mean Sensitivity	0.973333	25
1967	Kraken (HMS)	Mean Sensitivity	0.96	25
1968	Kraken (HMS)	Mean Sensitivity	0.973333	25
1969	Kraken (HMS)	Mean Sensitivity	0.946667	25
1970	Kraken (HMS)	Mean Sensitivity	0.986667	25
1971	Kraken (HMS)	Mean Sensitivity	0.966667	30
1972	Kraken (HMS)	Mean Sensitivity	0.955556	30
1973	Kraken (HMS)	Mean Sensitivity	0.977778	30
1974	Kraken (HMS)	Mean Sensitivity	0.933333	30
1975	Kraken (HMS)	Mean Sensitivity	0.966667	30
1976	Kraken (HMS)	Mean Sensitivity	0.966667	30
1977	Kraken (HMS)	Mean Sensitivity	0.922222	30
1978	Kraken (HMS)	Mean Sensitivity	0.988889	30
1979	Kraken (HMS)	Mean Sensitivity	0.955556	30
1980	Kraken (HMS)	Mean Sensitivity	0.988889	30
1981	Kraken (HMS)	Mean Sensitivity	0.980952	35
1982	Kraken (HMS)	Mean Sensitivity	0.980952	35
1983	Kraken (HMS)	Mean Sensitivity	0.971429	35
1984	Kraken (HMS)	Mean Sensitivity	0.961905	35
1985	Kraken (HMS)	Mean Sensitivity	0.990476	35
1986	Kraken (HMS)	Mean Sensitivity	0.971429	35
1987	Kraken (HMS)	Mean Sensitivity	0.971429	35
1988	Kraken (HMS)	Mean Sensitivity	0.980952	35
1989	Kraken (HMS)	Mean Sensitivity	0.952381	35
1990	Kraken (HMS)	Mean Sensitivity	0.971429	35
1991	Kraken (HMS)	Mean Sensitivity	0.966667	40
1992	Kraken (HMS)	Mean Sensitivity	0.991667	40
1993	Kraken (HMS)	Mean Sensitivity	0.983333	40
1994	Kraken (HMS)	Mean Sensitivity	0.983333	40
1995	Kraken (HMS)	Mean Sensitivity	0.958333	40
1996	Kraken (HMS)	Mean Sensitivity	0.95	40
1997	Kraken (HMS)	Mean Sensitivity	0.975	40
1998	Kraken (HMS)	Mean Sensitivity	0.966667	40
1999	Kraken (HMS)	Mean Sensitivity	1	40
[truncated: 2,481 more rows]

## Sheet: EDF 8b
sampleID	disease_type_consol	dataset	A.fischeri read count
12667.X3039009	Healthy Control	Shogun	6.5
12691.rana30	PRAD	Shogun	23.5
Control.80	bacteria monoculture	Shogun	4.5
12691.rana10	PRAD	Shogun	20.5
12667.X2062971	Healthy Control	Shogun	47.5
12667.X2051123	Healthy Control	Shogun	1.5
12691.rana33	PRAD	Shogun	97.5
12692.2	SKCM	Shogun	9.5
12667.X2050079	Healthy Control	Shogun	4.5
Control.85	bacteria monoculture	Shogun	17.5
Control.78	bacteria monoculture	Shogun	1779.5
Control.29	Healthy Control	Shogun	9.5
12667.X2047268	Healthy Control	Shogun	11.5
12667.X2076954	Healthy Control	Shogun	45.5
Control.65	control blank DNA extraction	Shogun	0.5
12691.rana52	PRAD	Shogun	0.5
12667.X2068980	Healthy Control	Shogun	30.5
Control.23	Healthy Control	Shogun	6.5
12667.X2043129	Healthy Control	Shogun	188.5
Control.64	control blank DNA extraction	Shogun	1.5
Control.32	Healthy Control	Shogun	3.5
12691.rana19	PRAD	Shogun	1565.5
Control.37	Healthy Control	Shogun	5.5
12667.X2471017	Healthy Control	Shogun	17.5
12692.2	SKCM	Shogun	2.5
Control.16	Healthy Control	Shogun	0.5
12692.2	SKCM	Shogun	11.5
12692.2	NSCLC	Shogun	35.5
Control.7	Healthy Control	Shogun	3.5
12667.X2052632	Healthy Control	Shogun	4.5
Control.53	bacteria monoculture	Shogun	297.5
Control.62	control blank DNA extraction	Shogun	0.5
Control.87	bacteria monoculture	Shogun	34.5
12691.rana56	PRAD	Shogun	25.5
12692.2	NSCLC	Shogun	4.5
12667.X2064367	Healthy Control	Shogun	18.5
12667.X2061208	Healthy Control	Shogun	206.5
Control.58	control blank DNA extraction	Shogun	73.5
Control.48	bacteria monoculture	Shogun	8.96446e+07
12691.rana26	PRAD	Shogun	16.5
12691.rana17	PRAD	Shogun	8.5
Control.46	control blank library prep	Shogun	0.5
12667.X3030973	Healthy Control	Shogun	17.5
12691.rana54	PRAD	Shogun	12.5
Control.61	control blank DNA extraction	Shogun	1.5
Control.81	bacteria monoculture	Shogun	4.0005e+07
12691.rana61	PRAD	Shogun	7.5
12692.2	SKCM	Shogun	221.5
12692.2	NSCLC	Shogun	14.5
12667.X2068559	Healthy Control	Shogun	30.5
12667.X2488349	Healthy Control	Shogun	44.5
12667.X2049520	Healthy Control	Shogun	63.5
12692.2	SKCM	Shogun	5.5
12692.2	NSCLC	Shogun	6.5
12667.X2488000	Healthy Control	Shogun	32.5
Control.19	Healthy Control	Shogun	1.5
12667.X2457964	Healthy Control	Shogun	15.5
12692.2	NSCLC	Shogun	5.5
12691.rana35	PRAD	Shogun	20.5
12691.rana03	PRAD	Shogun	596.5
12691.rana20	PRAD	Shogun	1110.5
12691.rana05	PRAD	Shogun	193.5
Control.22	Healthy Control	Shogun	25.5
Control.26	Healthy Control	Shogun	19.5
12667.X2147547	Healthy Control	Shogun	47.5
Control.44	control blank library prep	Shogun	1.5
12667.X3004746	Healthy Control	Shogun	7.5
Control.51	bacteria monoculture	Shogun	62271.5
Control.84	bacteria monoculture	Shogun	63970.5
12667.X2055755	Healthy Control	Shogun	182.5
12667.X2378267	Healthy Control	Shogun	29.5
Control.24	Healthy Control	Shogun	1.5
12667.X2059586	Healthy Control	Shogun	4.5
12691.rana01	PRAD	Shogun	1639.5
12667.X2067131	Healthy Control	Shogun	9.5
12691.rana28	PRAD	Shogun	10.5
12691.rana16	PRAD	Shogun	6.5
12691.rana11	PRAD	Shogun	5.5
Control.25	Healthy Control	Shogun	278.5
Control.2	control blank DNA extraction	Shogun	187.5
12667.X2060998	Healthy Control	Shogun	1659.5
12691.rana21	PRAD	Shogun	252.5
12667.X3003105	Healthy Control	Shogun	16.5
12691.rana47	PRAD	Shogun	7.5
12692.2	SKCM	Shogun	2.5
Control.41	Healthy Control	Shogun	11.5
12667.X2052835	Healthy Control	Shogun	3.5
Control.45	control blank library prep	Shogun	0.5
12692.2	NSCLC	Shogun	10.5
Control.35	Healthy Control	Shogun	120.5
12667.X2403412	Healthy Control	Shogun	2.5
12667.X3106774	Healthy Control	Shogun	23.5
12692.2	NSCLC	Shogun	15.5
Control.90	control blank library prep	Shogun	5.5
Control.66	control blank DNA extraction	Shogun	0.5
12691.rana12	PRAD	Shogun	2.5
Control.34	Healthy Control	Shogun	15.5
Control.15	Healthy Control	Shogun	0.5
Control.12	Healthy Control	Shogun	2.5
12667.X2071711	Healthy Control	Shogun	1215.5
Control.17	Healthy Control	Shogun	77.5
Control.18	Healthy Control	Shogun	1.5
Control.28	Healthy Control	Shogun	30.5
12667.X2036767	Healthy Control	Shogun	275.5
Control.82	bacteria monoculture	Shogun	1.94803e+07
12667.X2061316	Healthy Control	Shogun	4.5
Control.60	control blank DNA extraction	Shogun	15.5
12691.rana24	PRAD	Shogun	249.5
12667.X3076646	Healthy Control	Shogun	9.5
12691.rana45	PRAD	Shogun	6.5
12692.2	NSCLC	Shogun	25.5
12691.rana50	PRAD	Shogun	8.5
12691.rana07	PRAD	Shogun	13.5
Control.95	control blank library prep	Shogun	0.5
Control.38	Healthy Control	Shogun	2.5
Control.39	Healthy Control	Shogun	7.5
12667.X2062455	Healthy Control	Shogun	12.5
12691.rana41	PRAD	Shogun	30.5
12667.X2076870	Healthy Control	Shogun	40.5
Control.73	bacteria monoculture	Shogun	4.5
Control.49	bacteria monoculture	Shogun	8.70853e+07
12692.2	SKCM	Shogun	5.5
12691.rana23	PRAD	Shogun	103.5
12691.rana15	PRAD	Shogun	3.5
Control.30	Healthy Control	Shogun	3.5
12692.2	NSCLC	Shogun	11.5
12691.rana18	PRAD	Shogun	2.5
12667.X3074166	Healthy Control	Shogun	8.5
12692.2	NSCLC	Shogun	4.5
12667.X2041787	Healthy Control	Shogun	71.5
12667.X3056486	Healthy Control	Shogun	20.5
12667.X2061359	Healthy Control	Shogun	4.5
12691.rana13	PRAD	Shogun	11.5
Control.56	control blank DNA extraction	Shogun	0.5
Control.93	control blank library prep	Shogun	0.5
12667.X2056691	Healthy Control	Shogun	1654.5
12667.X2064352	Healthy Control	Shogun	36.5
Control.91	control blank library prep	Shogun	2.5
12691.rana27	PRAD	Shogun	37.5
12667.X2130028	Healthy Control	Shogun	1.5
12667.X2493385	Healthy Control	Shogun	3.5
12691.rana37	PRAD	Shogun	18.5
12691.rana46	PRAD	Shogun	4.5
Control.88	control blank library prep	Shogun	5.5
12667.X2068760	Healthy Control	Shogun	14.5
Control.6	Healthy Control	Shogun	3.5
12692.2	NSCLC	Shogun	213.5
Control.27	Healthy Control	Shogun	1.5
12667.X2454843	Healthy Control	Shogun	10.5
12691.rana53	PRAD	Shogun	4.5
12691.rana22	PRAD	Shogun	89.5
12692.2	SKCM	Shogun	4.5
12691.rana02	PRAD	Shogun	1929.5
Control.4	control blank DNA extraction	Shogun	0.5
12691.rana48	PRAD	Shogun	6.5
12691.rana34	PRAD	Shogun	81.5
Control.71	bacteria monoculture	Shogun	0.5
12691.rana38	PRAD	Shogun	101.5
12667.X3034050	Healthy Control	Shogun	22.5
Control.96	control blank library prep	Shogun	0.5
Control.94	control blank library prep	Shogun	0.5
12691.rana40	PRAD	Shogun	27.5
12692.2	NSCLC	Shogun	8.5
12691.rana29	PRAD	Shogun	10.5
12691.rana55	PRAD	Shogun	5.5
12692.2	NSCLC	Shogun	3.5
12667.X3124859	Healthy Control	Shogun	16.5
12692.2	NSCLC	Shogun	2.5
12691.rana60	PRAD	Shogun	109.5
Control.20	Healthy Control	Shogun	0.5
Control.55	control blank DNA extraction	Shogun	2.5
12667.X2062843	Healthy Control	Shogun	12.5
12667.X2061574	Healthy Control	Shogun	220.5
Control.70	bacteria monoculture	Shogun	34544.5
12691.rana06	PRAD	Shogun	132.5
12691.rana09	PRAD	Shogun	7.5
Control.54	bacteria monoculture	Shogun	12.5
12692.2	SKCM	Shogun	131.5
12667.X2051138	Healthy Control	Shogun	114.5
12667.X2043400	Healthy Control	Shogun	49.5
12667.X2170593	Healthy Control	Shogun	5.5
Control.50	bacteria monoculture	Shogun	627538
Control.86	bacteria monoculture	Shogun	203.5
12692.2	NSCLC	Shogun	5.5
12667.X2036793	Healthy Control	Shogun	168.5
12692.2	NSCLC	Shogun	3.5
12667.X2044156	Healthy Control	Shogun	3.5
Control.59	control blank DNA extraction	Shogun	9.5
Control.79	bacteria monoculture	Shogun	150.5
Control.5	Healthy Control	Shogun	4.5
12692.2	NSCLC	Shogun	3.5
12691.rana49	PRAD	Shogun	1.5
Control.89	control blank library prep	Shogun	1.5
12691.rana44	PRAD	Shogun	4.5
Control.57	control blank DNA extraction	Shogun	0.5
Control.33	Healthy Control	Shogun	3.5
Control.43	Healthy Control	Shogun	1.5
12667.X2065210	Healthy Control	Shogun	3.5
12692.2	SKCM	Shogun	11.5
12691.rana25	PRAD	Shogun	42.5
Control.83	bacteria monoculture	Shogun	505146
Control.3	control blank DNA extraction	Shogun	1.5
Control.76	bacteria monoculture	Shogun	494788
12692.2	SKCM	Shogun	7.5
Control.63	control blank DNA extraction	Shogun	0.5
12692.2	SKCM	Shogun	12.5
12691.rana39	PRAD	Shogun	28.5
12667.X2069281	Healthy Control	Shogun	40.5
12667.X2062809	Healthy Control	Shogun	6.5
12667.X3054832	Healthy Control	Shogun	11.5
Control.14	Healthy Control	Shogun	64.5
12692.2	SKCM	Shogun	27.5
Control.74	bacteria monoculture	Shogun	9.00399e+07
12667.X2483184	Healthy Control	Shogun	10.5
12667.X2342267	Healthy Control	Shogun	1.5
12691.rana04	PRAD	Shogun	301.5
12691.rana31	PRAD	Shogun	2.5
12691.rana42	PRAD	Shogun	13.5
12692.2	NSCLC	Shogun	10.5
12692.2	NSCLC	Shogun	2.5
Control.68	bacteria monoculture	Shogun	2.7207e+07
12692.2	NSCLC	Shogun	1.5
Control.97	control blank library prep	Shogun	8.5
Control.36	Healthy Control	Shogun	62.5
12667.X2496221	Healthy Control	Shogun	11.5
12691.rana59	PRAD	Shogun	5.5
12667.X2339235	Healthy Control	Shogun	15.5
12667.X2470952	Healthy Control	Shogun	0.5
12691.rana14	PRAD	Shogun	1.5
12692.2	SKCM	Shogun	18.5
Control.69	bacteria monoculture	Shogun	506850
Control.21	Healthy Control	Shogun	125.5
Control.77	bacteria monoculture	Shogun	40492.5
12667.X3109641	Healthy Control	Shogun	4.5
12667.X2058733	Healthy Control	Shogun	9.5
12692.2	NSCLC	Shogun	15.5
Control.9	Healthy Control	Shogun	84.5
Control.92	control blank library prep	Shogun	7.5
Control.1	control blank DNA extraction	Shogun	2.5
Control.13	Healthy Control	Shogun	52.5
12692.2	NSCLC	Shogun	20.5
Control.47	control blank library prep	Shogun	0.5
12692.2	NSCLC	Shogun	13.5
12691.rana08	PRAD	Shogun	26.5
12667.X2074003	Healthy Control	Shogun	349.5
12692.2	SKCM	Shogun	335.5
12667.X2048152	Healthy Control	Shogun	3.5
12692.2	NSCLC	Shogun	7.5
Control.8	Healthy Control	Shogun	0.5
Control.31	Healthy Control	Shogun	16.5
12667.X3122336	Healthy Control	Shogun	2.5
12691.rana36	PRAD	Shogun	38.5
12692.2	NSCLC	Shogun	20.5
12691.rana32	PRAD	Shogun	10.5
Control.75	bacteria monoculture	Shogun	8.38709e+07
12667.X2472337	Healthy Control	Shogun	5.5
12692.2	SKCM	Shogun	19.5
Control.40	Healthy Control	Shogun	10.5
Control.67	bacteria monoculture	Shogun	3.77054e+07
Control.10	Healthy Control	Shogun	35.5
Control.11	Healthy Control	Shogun	5.5
Control.52	bacteria monoculture	Shogun	1024.5
Control.42	Healthy Control	Shogun	4.5
12691.rana43	PRAD	Shogun	7.5
12691.rana51	PRAD	Shogun	13.5
Control.72	bacteria monoculture	Shogun	135.5
12667.X30390091	Healthy Control	Kraken	40.5
12691.rana301	PRAD	Kraken	110.5
Control.801	bacteria monoculture	Kraken	14.5
12691.rana101	PRAD	Kraken	89.5
12667.X20629711	Healthy Control	Kraken	200.5
12667.X20511231	Healthy Control	Kraken	14.5
12691.rana331	PRAD	Kraken	539.5
12692.2	SKCM	Kraken	38.5
12667.X20500791	Healthy Control	Kraken	33.5
Control.851	bacteria monoculture	Kraken	41.5
Control.781	bacteria monoculture	Kraken	6359.5
Control.291	Healthy Control	Kraken	32.5
12667.X20472681	Healthy Control	Kraken	46.5
12667.X20769541	Healthy Control	Kraken	193.5
Control.651	control blank DNA extraction	Kraken	0.5
12691.rana521	PRAD	Kraken	28.5
12667.X20689801	Healthy Control	Kraken	45.5
Control.231	Healthy Control	Kraken	2.5
12667.X20431291	Healthy Control	Kraken	48.5
Control.641	control blank DNA extraction	Kraken	3.5
Control.321	Healthy Control	Kraken	13.5
12691.rana191	PRAD	Kraken	4962.5
Control.371	Healthy Control	Kraken	15.5
12667.X24710171	Healthy Control	Kraken	79.5
12692.2	SKCM	Kraken	11.5
Control.161	Healthy Control	Kraken	5.5
12692.2	SKCM	Kraken	72.5
12692.2	NSCLC	Kraken	80.5
Control.710	Healthy Control	Kraken	21.5
12667.X20526321	Healthy Control	Kraken	26.5
Control.531	bacteria monoculture	Kraken	1226.5
Control.621	control blank DNA extraction	Kraken	17.5
Control.871	bacteria monoculture	Kraken	64.5
12691.rana561	PRAD	Kraken	71.5
12692.2	NSCLC	Kraken	14.5
12667.X20643671	Healthy Control	Kraken	68.5
12667.X20612081	Healthy Control	Kraken	539.5
Control.581	control blank DNA extraction	Kraken	172.5
Control.481	bacteria monoculture	Kraken	3.11545e+08
12691.rana261	PRAD	Kraken	67.5
12691.rana171	PRAD	Kraken	35.5
Control.461	control blank library prep	Kraken	6.5
12667.X30309731	Healthy Control	Kraken	80.5
12691.rana541	PRAD	Kraken	15.5
Control.611	control blank DNA extraction	Kraken	1.5
Control.811	bacteria monoculture	Kraken	1.36663e+08
12691.rana611	PRAD	Kraken	43.5
12692.2	SKCM	Kraken	189.5
12692.2	NSCLC	Kraken	49.5
12667.X20685591	Healthy Control	Kraken	23.5
12667.X24883491	Healthy Control	Kraken	135.5
12667.X20495201	Healthy Control	Kraken	28.5
12692.2	SKCM	Kraken	17.5
12692.2	NSCLC	Kraken	2.5
12667.X24880001	Healthy Control	Kraken	194.5
Control.191	Healthy Control	Kraken	14.5
12667.X24579641	Healthy Control	Kraken	52.5
12692.2	NSCLC	Kraken	37.5
12691.rana351	PRAD	Kraken	76.5
12691.rana031	PRAD	Kraken	819.5
12691.rana201	PRAD	Kraken	3249.5
12691.rana051	PRAD	Kraken	32.5
Control.221	Healthy Control	Kraken	58.5
Control.261	Healthy Control	Kraken	66.5
12667.X21475471	Healthy Control	Kraken	159.5
Control.441	control blank library prep	Kraken	1.5
12667.X30047461	Healthy Control	Kraken	73.5
Control.511	bacteria monoculture	Kraken	217352
Control.841	bacteria monoculture	Kraken	169370
12667.X20557551	Healthy Control	Kraken	686.5
12667.X23782671	Healthy Control	Kraken	59.5
Control.241	Healthy Control	Kraken	28.5
12667.X20595861	Healthy Control	Kraken	37.5
12691.rana011	PRAD	Kraken	65.5
12667.X20671311	Healthy Control	Kraken	60.5
12691.rana281	PRAD	Kraken	76.5
12691.rana161	PRAD	Kraken	28.5
12691.rana111	PRAD	Kraken	33.5
Control.251	Healthy Control	Kraken	970.5
Control.210	control blank DNA extraction	Kraken	727.5
12667.X20609981	Healthy Control	Kraken	5541.5
12691.rana211	PRAD	Kraken	820.5
12667.X30031051	Healthy Control	Kraken	56.5
12691.rana471	PRAD	Kraken	21.5
12692.2	SKCM	Kraken	19.5
Control.411	Healthy Control	Kraken	128.5
12667.X20528351	Healthy Control	Kraken	54.5
Control.451	control blank library prep	Kraken	2.5
12692.2	NSCLC	Kraken	56.5
Control.351	Healthy Control	Kraken	296.5
12667.X24034121	Healthy Control	Kraken	12.5
12667.X31067741	Healthy Control	Kraken	57.5
12692.2	NSCLC	Kraken	58.5
Control.901	control blank library prep	Kraken	44.5
Control.661	control blank DNA extraction	Kraken	0.5
12691.rana121	PRAD	Kraken	16.5
Control.341	Healthy Control	Kraken	70.5
Control.151	Healthy Control	Kraken	3.5
Control.121	Healthy Control	Kraken	15.5
12667.X20717111	Healthy Control	Kraken	4750.5
Control.171	Healthy Control	Kraken	159.5
Control.181	Healthy Control	Kraken	32.5
Control.281	Healthy Control	Kraken	117.5
12667.X20367671	Healthy Control	Kraken	125.5
Control.821	bacteria monoculture	Kraken	7.16259e+07
12667.X20613161	Healthy Control	Kraken	27.5
Control.601	control blank DNA extraction	Kraken	21.5
12691.rana241	PRAD	Kraken	615.5
12667.X30766461	Healthy Control	Kraken	39.5
12691.rana451	PRAD	Kraken	30.5
12692.2	NSCLC	Kraken	52.5
12691.rana501	PRAD	Kraken	33.5
12691.rana071	PRAD	Kraken	51.5
Control.951	control blank library prep	Kraken	0.5
Control.381	Healthy Control	Kraken	9.5
Control.391	Healthy Control	Kraken	43.5
12667.X20624551	Healthy Control	Kraken	49.5
12691.rana411	PRAD	Kraken	115.5
12667.X20768701	Healthy Control	Kraken	109.5
Control.731	bacteria monoculture	Kraken	10.5
Control.491	bacteria monoculture	Kraken	2.94353e+08
12692.2	SKCM	Kraken	18.5
12691.rana231	PRAD	Kraken	326.5
12691.rana151	PRAD	Kraken	12.5
Control.301	Healthy Control	Kraken	22.5
12692.2	NSCLC	Kraken	58.5
12691.rana181	PRAD	Kraken	15.5
12667.X30741661	Healthy Control	Kraken	30.5
12692.2	NSCLC	Kraken	48.5
12667.X20417871	Healthy Control	Kraken	42.5
12667.X30564861	Healthy Control	Kraken	99.5
12667.X20613591	Healthy Control	Kraken	27.5
12691.rana131	PRAD	Kraken	63.5
Control.561	control blank DNA extraction	Kraken	0.5
Control.931	control blank library prep	Kraken	0.5
12667.X20566911	Healthy Control	Kraken	6126.5
12667.X20643521	Healthy Control	Kraken	90.5
Control.911	control blank library prep	Kraken	17.5
12691.rana271	PRAD	Kraken	78.5
12667.X21300281	Healthy Control	Kraken	11.5
12667.X24933851	Healthy Control	Kraken	44.5
12691.rana371	PRAD	Kraken	65.5
12691.rana461	PRAD	Kraken	24.5
Control.881	control blank library prep	Kraken	23.5
12667.X20687601	Healthy Control	Kraken	67.5
Control.610	Healthy Control	Kraken	11.5
12692.2	NSCLC	Kraken	24.5
Control.271	Healthy Control	Kraken	3.5
12667.X24548431	Healthy Control	Kraken	31.5
12691.rana531	PRAD	Kraken	13.5
12691.rana221	PRAD	Kraken	415.5
12692.2	SKCM	Kraken	15.5
12691.rana021	PRAD	Kraken	54.5
Control.410	control blank DNA extraction	Kraken	3.5
12691.rana481	PRAD	Kraken	15.5
12691.rana341	PRAD	Kraken	288.5
Control.711	bacteria monoculture	Kraken	0.5
12691.rana381	PRAD	Kraken	273.5
12667.X30340501	Healthy Control	Kraken	98.5
Control.961	control blank library prep	Kraken	1.5
Control.941	control blank library prep	Kraken	2.5
12691.rana401	PRAD	Kraken	94.5
12692.2	NSCLC	Kraken	9.5
12691.rana291	PRAD	Kraken	55.5
12691.rana551	PRAD	Kraken	35.5
12692.2	NSCLC	Kraken	29.5
12667.X31248591	Healthy Control	Kraken	61.5
12692.2	NSCLC	Kraken	16.5
12691.rana601	PRAD	Kraken	428.5
Control.201	Healthy Control	Kraken	5.5
Control.551	control blank DNA extraction	Kraken	3.5
12667.X20628431	Healthy Control	Kraken	12.5
12667.X20615741	Healthy Control	Kraken	958.5
Control.701	bacteria monoculture	Kraken	121166
12691.rana061	PRAD	Kraken	43.5
12691.rana091	PRAD	Kraken	42.5
Control.541	bacteria monoculture	Kraken	42.5
12692.2	SKCM	Kraken	486.5
12667.X20511381	Healthy Control	Kraken	589.5
12667.X20434001	Healthy Control	Kraken	38.5
12667.X21705931	Healthy Control	Kraken	24.5
Control.501	bacteria monoculture	Kraken	2.33021e+06
Control.861	bacteria monoculture	Kraken	611.5
12692.2	NSCLC	Kraken	17.5
12667.X20367931	Healthy Control	Kraken	78.5
12692.2	NSCLC	Kraken	10.5
12667.X20441561	Healthy Control	Kraken	9.5
Control.591	control blank DNA extraction	Kraken	22.5
Control.791	bacteria monoculture	Kraken	573.5
Control.510	Healthy Control	Kraken	19.5
12692.2	NSCLC	Kraken	21.5
12691.rana491	PRAD	Kraken	10.5
Control.891	control blank library prep	Kraken	10.5
12691.rana441	PRAD	Kraken	36.5
Control.571	control blank DNA extraction	Kraken	3.5
Control.331	Healthy Control	Kraken	16.5
Control.431	Healthy Control	Kraken	8.5
12667.X20652101	Healthy Control	Kraken	12.5
12692.2	SKCM	Kraken	88.5
12691.rana251	PRAD	Kraken	169.5
Control.831	bacteria monoculture	Kraken	1.85286e+06
Control.310	control blank DNA extraction	Kraken	9.5
Control.761	bacteria monoculture	Kraken	1.88432e+06
12692.2	SKCM	Kraken	23.5
Control.631	control blank DNA extraction	Kraken	2.5
12692.2	SKCM	Kraken	41.5
12691.rana391	PRAD	Kraken	125.5
12667.X20692811	Healthy Control	Kraken	122.5
12667.X20628091	Healthy Control	Kraken	32.5
12667.X30548321	Healthy Control	Kraken	77.5
Control.141	Healthy Control	Kraken	174.5
12692.2	SKCM	Kraken	165.5
Control.741	bacteria monoculture	Kraken	2.34009e+08
12667.X24831841	Healthy Control	Kraken	40.5
12667.X23422671	Healthy Control	Kraken	10.5
12691.rana041	PRAD	Kraken	597.5
12691.rana311	PRAD	Kraken	20.5
12691.rana421	PRAD	Kraken	44.5
12692.2	NSCLC	Kraken	11.5
12692.2	NSCLC	Kraken	12.5
Control.681	bacteria monoculture	Kraken	9.50637e+07
12692.2	NSCLC	Kraken	20.5
Control.971	control blank library prep	Kraken	65.5
Control.361	Healthy Control	Kraken	160.5
12667.X24962211	Healthy Control	Kraken	49.5
12691.rana591	PRAD	Kraken	20.5
12667.X23392351	Healthy Control	Kraken	51.5
12667.X24709521	Healthy Control	Kraken	9.5
12691.rana141	PRAD	Kraken	8.5
12692.2	SKCM	Kraken	74.5
Control.691	bacteria monoculture	Kraken	1.81466e+06
Control.211	Healthy Control	Kraken	498.5
Control.771	bacteria monoculture	Kraken	186820
12667.X31096411	Healthy Control	Kraken	10.5
12667.X20587331	Healthy Control	Kraken	46.5
12692.2	NSCLC	Kraken	41.5
Control.98	Healthy Control	Kraken	355.5
Control.921	control blank library prep	Kraken	29.5
Control.110	control blank DNA extraction	Kraken	7.5
Control.131	Healthy Control	Kraken	67.5
12692.2	NSCLC	Kraken	37.5
Control.471	control blank library prep	Kraken	6.5
12692.2	NSCLC	Kraken	79.5
12691.rana081	PRAD	Kraken	80.5
12667.X20740031	Healthy Control	Kraken	1135.5
12692.2	SKCM	Kraken	29.5
12667.X20481521	Healthy Control	Kraken	17.5
12692.2	NSCLC	Kraken	24.5
Control.810	Healthy Control	Kraken	21.5
Control.311	Healthy Control	Kraken	52.5
12667.X31223361	Healthy Control	Kraken	19.5
12691.rana361	PRAD	Kraken	137.5
12692.2	NSCLC	Kraken	55.5
12691.rana321	PRAD	Kraken	37.5
Control.751	bacteria monoculture	Kraken	2.88973e+08
12667.X24723371	Healthy Control	Kraken	20.5
12692.2	SKCM	Kraken	78.5
Control.401	Healthy Control	Kraken	27.5
Control.671	bacteria monoculture	Kraken	1.30762e+08
Control.101	Healthy Control	Kraken	89.5
Control.111	Healthy Control	Kraken	24.5
Control.521	bacteria monoculture	Kraken	3670.5
Control.421	Healthy Control	Kraken	9.5
12691.rana431	PRAD	Kraken	14.5
12691.rana511	PRAD	Kraken	74.5
Control.721	bacteria monoculture	Kraken	565.5

## Sheet: EDF 8c
sampleID	Dilution	dataset	A.fischeri read count
Control.80	Vib7	Shogun	4.5
Control.85	Vib5	Shogun	17.5
Control.78	Vib5	Shogun	1779.5
Control.53	Vib6	Shogun	297.5
Control.87	Vib7	Shogun	34.5
Control.48	Vib1	Shogun	8.96446e+07
Control.81	Vib1	Shogun	4.0005e+07
Control.51	Vib4	Shogun	62271.5
Control.84	Vib4	Shogun	63970.5
Control.82	Vib2	Shogun	1.94803e+07
Control.73	Vib7	Shogun	4.5
Control.49	Vib2	Shogun	8.70853e+07
Control.71	Vib5	Shogun	0.5
Control.70	Vib4	Shogun	34544.5
Control.54	Vib7	Shogun	12.5
Control.50	Vib3	Shogun	627538
Control.86	Vib6	Shogun	203.5
Control.79	Vib6	Shogun	150.5
Control.83	Vib3	Shogun	505146
Control.76	Vib3	Shogun	494788
Control.74	Vib1	Shogun	9.00399e+07
Control.68	Vib2	Shogun	2.7207e+07
Control.69	Vib3	Shogun	506850
Control.77	Vib4	Shogun	40492.5
Control.75	Vib2	Shogun	8.38709e+07
Control.67	Vib1	Shogun	3.77054e+07
Control.52	Vib5	Shogun	1024.5
Control.72	Vib6	Shogun	135.5
Control.801	Vib7	Kraken	14.5
Control.851	Vib5	Kraken	41.5
Control.781	Vib5	Kraken	6359.5
Control.531	Vib6	Kraken	1226.5
Control.871	Vib7	Kraken	64.5
Control.481	Vib1	Kraken	3.11545e+08
Control.811	Vib1	Kraken	1.36663e+08
Control.511	Vib4	Kraken	217352
Control.841	Vib4	Kraken	169370
Control.821	Vib2	Kraken	7.16259e+07
Control.731	Vib7	Kraken	10.5
Control.491	Vib2	Kraken	2.94353e+08
Control.711	Vib5	Kraken	0.5
Control.701	Vib4	Kraken	121166
Control.541	Vib7	Kraken	42.5
Control.501	Vib3	Kraken	2.33021e+06
Control.861	Vib6	Kraken	611.5
Control.791	Vib6	Kraken	573.5
Control.831	Vib3	Kraken	1.85286e+06
Control.761	Vib3	Kraken	1.88432e+06
Control.741	Vib1	Kraken	2.34009e+08
Control.681	Vib2	Kraken	9.50637e+07
Control.691	Vib3	Kraken	1.81466e+06
Control.771	Vib4	Kraken	186820
Control.751	Vib2	Kraken	2.88973e+08
Control.671	Vib1	Kraken	1.30762e+08
Control.521	Vib5	Kraken	3670.5
Control.721	Vib6	Kraken	565.5

## Sheet: EDF 8d
sampleID	disease_type_consol	host_age_rounded_nearest_year
12667.X3039009	Control	46
12691.rana30	PRAD	72
12691.rana10	PRAD	82
12667.X2062971	Control	30
12667.X2051123	Control	59
12691.rana33	PRAD	70
12692.2	SKCM	81
12667.X2050079	Control	62
12667.X2047268	Control	47
12667.X2076954	Control	31
12691.rana52	PRAD	80
12667.X2068980	Control	59
12667.X2043129	Control	62
12691.rana19	PRAD	69
12667.X2471017	Control	62
12692.2	SKCM	60
12692.2	SKCM	55
12692.2	NSCLC	75
12667.X2052632	Control	36
12691.rana56	PRAD	80
12692.2	NSCLC	68
12667.X2064367	Control	42
12667.X2061208	Control	66
12691.rana26	PRAD	62
12691.rana17	PRAD	79
12667.X3030973	Control	55
12691.rana54	PRAD	66
12691.rana61	PRAD	67
12692.2	SKCM	70
12692.2	NSCLC	78
12667.X2068559	Control	32
12667.X2488349	Control	31
12667.X2049520	Control	53
12692.2	SKCM	71
12692.2	NSCLC	64
12667.X2488000	Control	40
12667.X2457964	Control	36
12692.2	NSCLC	80
12691.rana35	PRAD	69
12691.rana03	PRAD	64
12691.rana20	PRAD	82
12691.rana05	PRAD	64
12667.X2147547	Control	29
12667.X3004746	Control	30
12667.X2055755	Control	54
12667.X2378267	Control	46
12667.X2059586	Control	43
12691.rana01	PRAD	54
12667.X2067131	Control	54
12691.rana28	PRAD	79
12691.rana16	PRAD	78
12691.rana11	PRAD	62
12667.X2060998	Control	31
12691.rana21	PRAD	64
12667.X3003105	Control	26
12691.rana47	PRAD	69
12692.2	SKCM	41
12667.X2052835	Control	49
12692.2	NSCLC	69
12667.X2403412	Control	63
12667.X3106774	Control	57
12692.2	NSCLC	67
12691.rana12	PRAD	64
12667.X2071711	Control	25
12667.X2036767	Control	46
12667.X2061316	Control	46
12691.rana24	PRAD	70
12667.X3076646	Control	59
12691.rana45	PRAD	71
12692.2	NSCLC	64
12691.rana50	PRAD	76
12691.rana07	PRAD	73
12667.X2062455	Control	46
12691.rana41	PRAD	80
12667.X2076870	Control	47
12692.2	SKCM	60
12691.rana23	PRAD	82
12691.rana15	PRAD	54
12692.2	NSCLC	87
12691.rana18	PRAD	73
12667.X3074166	Control	58
12692.2	NSCLC	71
12667.X2041787	Control	20
12667.X3056486	Control	49
12667.X2061359	Control	34
12691.rana13	PRAD	81
12667.X2056691	Control	40
12667.X2064352	Control	60
12691.rana27	PRAD	55
12667.X2130028	Control	38
12667.X2493385	Control	46
12691.rana37	PRAD	92
12691.rana46	PRAD	53
12667.X2068760	Control	68
12692.2	NSCLC	46
12667.X2454843	Control	34
12691.rana53	PRAD	69
12691.rana22	PRAD	67
12692.2	SKCM	60
12691.rana02	PRAD	62
12691.rana48	PRAD	62
12691.rana34	PRAD	87
12691.rana38	PRAD	41
12667.X3034050	Control	66
12691.rana40	PRAD	73
12692.2	NSCLC	79
12691.rana29	PRAD	72
12691.rana55	PRAD	65
12692.2	NSCLC	83
12667.X3124859	Control	63
12692.2	NSCLC	64
12691.rana60	PRAD	74
12667.X2062843	Control	49
12667.X2061574	Control	61
12691.rana06	PRAD	77
12691.rana09	PRAD	62
12692.2	SKCM	64
12667.X2051138	Control	26
12667.X2043400	Control	36
12667.X2170593	Control	52
12692.2	NSCLC	56
12667.X2036793	Control	51
12692.2	NSCLC	69
12667.X2044156	Control	50
12692.2	NSCLC	62
12691.rana49	PRAD	69
12691.rana44	PRAD	57
12667.X2065210	Control	49
12692.2	SKCM	52
12691.rana25	PRAD	73
12692.2	SKCM	28
12692.2	SKCM	62
12691.rana39	PRAD	85
12667.X2069281	Control	50
12667.X2062809	Control	44
12667.X3054832	Control	21
12692.2	SKCM	53
12667.X2483184	Control	48
12667.X2342267	Control	24
12691.rana04	PRAD	66
12691.rana31	PRAD	67
12691.rana42	PRAD	54
12692.2	NSCLC	74
12692.2	NSCLC	59
12692.2	NSCLC	84
12667.X2496221	Control	41
12691.rana59	PRAD	69
12667.X2339235	Control	25
12667.X2470952	Control	25
12691.rana14	PRAD	66
12692.2	SKCM	58
12667.X3109641	Control	42
12667.X2058733	Control	26
12692.2	NSCLC	58
12692.2	NSCLC	63
12692.2	NSCLC	77
12691.rana08	PRAD	66
12667.X2074003	Control	55
12692.2	SKCM	47
12667.X2048152	Control	47
12692.2	NSCLC	64
12667.X3122336	Control	58
12691.rana36	PRAD	69
12692.2	NSCLC	77
12691.rana32	PRAD	80
12667.X2472337	Control	50
12692.2	SKCM	74
12691.rana43	PRAD	64
12691.rana51	PRAD	82

## Sheet: EDF 8e
	Male	Female
Healthy Controls	52	17
PC	59	0
SKCM	14	2
LC	8	17
Χ2 = 49.688 | df = 3
p = 9.31 x 10-11

## Sheet: EDF 8f
Kraken Taxa	SHOGUN Taxa
k__Archaea.p__Thaumarchaeota.o__Nitrosopumilales.f__Nitrosopumilaceae.g__Candidatus_Nitrosoarchaeum	k__Archaea.p__Crenarchaeota.c__Thermoprotei.o__Acidilobales.f__Acidilobaceae.g__Acidilobus
k__Bacteria.p__Actinobacteria.c__Actinobacteria.o__Micrococcales.f__Dermabacteraceae.g__Helcobacillus	k__Archaea.p__Crenarchaeota.c__Thermoprotei.o__Acidilobales.f__Caldisphaeraceae.g__Caldisphaera
k__Bacteria.p__Actinobacteria.c__Actinobacteria.o__Actinomycetales.f__Actinomycetaceae.g__Arcanobacterium	k__Archaea.p__Crenarchaeota.c__Thermoprotei.o__Desulfurococcales.f__Desulfurococcaceae.g__Ignicoccus
k__Bacteria.p__Proteobacteria.c__Gammaproteobacteria.o__Alteromonadales.f__Alteromonadaceae.g__Aliagarivorans	k__Archaea.p__Crenarchaeota.c__Thermoprotei.o__Desulfurococcales.f__Desulfurococcaceae.g__Staphylothermus
k__Bacteria.p__Proteobacteria.c__Gammaproteobacteria.o__Enterobacteriales.f__Enterobacteriaceae.g__Escherichia	k__Archaea.p__Crenarchaeota.c__Thermoprotei.o__Sulfolobales.f__Sulfolobaceae.g__Metallosphaera
k__Bacteria.p__Proteobacteria.c__Gammaproteobacteria.o__Pasteurellales.f__Pasteurellaceae.g__Bibersteinia	k__Archaea.p__Crenarchaeota.c__Thermoprotei.o__Sulfolobales.f__Sulfolobaceae.g__Sulfolobus
k__Bacteria.p__Actinobacteria.c__Actinobacteria.o__Corynebacteriales.f__Dietziaceae.g__Dietzia	k__Archaea.p__Crenarchaeota.c__Thermoprotei.o__Thermoproteales.f__Thermoproteaceae.g__Pyrobaculum
k__Bacteria.p__Proteobacteria.c__Gammaproteobacteria.o__Enterobacteriales.f__Enterobacteriaceae.g__Enterobacter	k__Archaea.p__Crenarchaeota.c__Thermoprotei.o__Thermoproteales.f__Thermoproteaceae.g__Thermoproteus
k__Bacteria.p__Proteobacteria.c__Gammaproteobacteria.o__Enterobacteriales.f__Enterobacteriaceae.g__Candidatus_Moranella	k__Archaea.p__Crenarchaeota.c__Thermoprotei.o__Thermoproteales.f__Thermoproteaceae.g__Vulcanisaeta
k__Bacteria.p__Bacteroidetes.c__Flavobacteriia.o__Flavobacteriales.f__Flavobacteriaceae.g__Vitellibacter	k__Archaea.p__Euryarchaeota.c__.o__.f__.g__Aciduliprofundum
k__Bacteria.p__Proteobacteria.c__Alphaproteobacteria.o__Rhizobiales.f__Rhodobiaceae.g__Tepidicaulis	k__Archaea.p__Euryarchaeota.c__Halobacteria.o__Halobacteriales.f__.g__
k__Bacteria.p__Bacteroidetes.c__Flavobacteriia.o__Flavobacteriales.f__Flavobacteriaceae.g__Zobellia	k__Archaea.p__Euryarchaeota.c__Halobacteria.o__Halobacteriales.f__Haloarculaceae.g__Halorhabdus
k__Bacteria.p__Bacteroidetes.c__Cytophagia.o__Cytophagales.f__Flammeovirgaceae.g__Cesiribacter	k__Archaea.p__Euryarchaeota.c__Halobacteria.o__Halobacteriales.f__Haloarculaceae.g__Natronomonas
k__Bacteria.p__Proteobacteria.c__Alphaproteobacteria.o__Rhodobacterales.f__Hyphomonadaceae.g__Robiginitomaculum	k__Archaea.p__Euryarchaeota.c__Halobacteria.o__Halobacteriales.f__Halobacteriaceae.g__Haladaptatus
k__Bacteria.p__Tenericutes.c__Mollicutes.o__Mycoplasmatales.f__Mycoplasmataceae.g__Mycoplasma	k__Archaea.p__Euryarchaeota.c__Halobacteria.o__Halobacteriales.f__Halobacteriaceae.g__Halalkalicoccus
k__Bacteria.p__Cyanobacteria.o__Chroococcales.g__Acaryochloris	k__Archaea.p__Euryarchaeota.c__Halobacteria.o__Haloferacales.f__Haloferacaceae.g__Haloquadratum
k__Bacteria.p__Proteobacteria.c__Gammaproteobacteria.o__Enterobacteriales.f__Enterobacteriaceae.g__Photorhabdus	k__Archaea.p__Euryarchaeota.c__Halobacteria.o__Haloferacales.f__Halorubraceae.g__Halorubrum
k__Bacteria.p__Bacteroidetes.c__Flavobacteriia.o__Flavobacteriales.f__Flavobacteriaceae.g__Croceitalea	k__Archaea.p__Euryarchaeota.c__Halobacteria.o__Natrialbales.f__Natrialbaceae.g__Halobiforma
k__Bacteria.p__Chloroflexi.c__Ktedonobacteria.o__Thermogemmatisporales.f__Thermogemmatisporaceae.g__Thermogemmatispora	k__Archaea.p__Euryarchaeota.c__Halobacteria.o__Natrialbales.f__Natrialbaceae.g__Natrialba
k__Archaea.p__Euryarchaeota.c__Halobacteria.o__Haloferacales.f__Haloferacaceae.g__Halogranum	k__Archaea.p__Euryarchaeota.c__Halobacteria.o__Natrialbales.f__Natrialbaceae.g__Natronobacterium
k__Bacteria.p__Actinobacteria.c__Actinobacteria.o__Propionibacteriales.f__Nocardioidaceae.g__Nocardioides	k__Archaea.p__Euryarchaeota.c__Methanobacteria.o__Methanobacteriales.f__Methanobacteriaceae.g__Methanobacterium
k__Bacteria.p__Proteobacteria.c__Gammaproteobacteria.o__Oceanospirillales.f__Oceanospirillaceae.g__Marinospirillum	k__Archaea.p__Euryarchaeota.c__Methanococci.o__Methanococcales.f__Methanocaldococcaceae.g__Methanocaldococcus
k__Bacteria.p__Verrucomicrobia.c__Spartobacteria.g__Terrimicrobium	k__Archaea.p__Euryarchaeota.c__Methanococci.o__Methanococcales.f__Methanocaldococcaceae.g__Methanotorris
k__Archaea.p__Crenarchaeota.c__Thermoprotei.o__Desulfurococcales.f__Desulfurococcaceae.g__Aeropyrum	k__Archaea.p__Euryarchaeota.c__Methanomicrobia.o__Methanomicrobiales.f__Methanomicrobiaceae.g__Methanoculleus
k__Bacteria.p__Proteobacteria.c__Betaproteobacteria.o__Burkholderiales.f__Comamonadaceae.g__Hydrogenophaga	k__Archaea.p__Euryarchaeota.c__Methanomicrobia.o__Methanosarcinales.f__Methanosarcinaceae.g__Methanococcoides
k__Bacteria.p__Proteobacteria.c__Gammaproteobacteria.o__Enterobacteriales.f__Enterobacteriaceae.g__Serratia	k__Archaea.p__Euryarchaeota.c__Methanomicrobia.o__Methanosarcinales.f__Methanosarcinaceae.g__Methanolobus
k__Archaea.p__Euryarchaeota.c__Thermoplasmata.o__Methanomassiliicoccales.f__Methanomassiliicoccaceae.g__Methanomassiliicoccus	k__Archaea.p__Euryarchaeota.c__Methanomicrobia.o__Methanosarcinales.f__Methanosarcinaceae.g__Methanosarcina
k__Bacteria.p__Proteobacteria.c__Gammaproteobacteria.o__Orbales.f__Orbaceae.g__Frischella	k__Archaea.p__Euryarchaeota.c__Thermococci.o__Thermococcales.f__Thermococcaceae.g__Pyrococcus
k__Bacteria.p__Proteobacteria.c__Betaproteobacteria.o__Burkholderiales.f__Comamonadaceae.g__Delftia	k__Archaea.p__Euryarchaeota.c__Thermoplasmata.o__Thermoplasmatales.f__.g__
k__Bacteria.p__Proteobacteria.c__Betaproteobacteria.o__Burkholderiales.f__Oxalobacteraceae.g__Herbaspirillum	k__Archaea.p__Euryarchaeota.c__Thermoplasmata.o__Thermoplasmatales.f__Ferroplasmaceae.g__Acidiplasma
k__Bacteria.p__Actinobacteria.c__Actinobacteria.o__Pseudonocardiales.f__Pseudonocardiaceae.g__Saccharothrix	k__Archaea.p__Thaumarchaeota.c__.o__.f__.g__Candidatus_Nitrosotenuis
k__Archaea.p__Euryarchaeota.c__Halobacteria.o__Haloferacales.f__Haloferacaceae.g__Haloplanus	k__Archaea.p__Thaumarchaeota.c__.o__Nitrosopumilales.f__Nitrosopumilaceae.g__Candidatus_Nitrosoarchaeum
k__Bacteria.p__Firmicutes.c__Clostridia.o__Clostridiales.f__Peptostreptococcaceae.g__Paraclostridium	k__Archaea.p__Thaumarchaeota.c__.o__Nitrosopumilales.f__Nitrosopumilaceae.g__Nitrosopumilus
k__Bacteria.p__Proteobacteria.c__Gammaproteobacteria.o__Xanthomonadales.f__Xanthomonadaceae.g__Xanthomonas	k__Archaea.p__Thaumarchaeota.c__Nitrososphaeria.o__Nitrososphaerales.f__Nitrososphaeraceae.g__Nitrososphaera
k__Bacteria.p__Proteobacteria.c__Gammaproteobacteria.o__Chromatiales.f__Chromatiaceae.g__Rheinheimera	k__Bacteria.p__.c__.o__.f__.g__
k__Bacteria.p__Bacteroidetes.c__Flavobacteriia.o__Flavobacteriales.g__Candidatus_Sulcia	k__Bacteria.p__.c__.o__.f__.g__Thermobaculum
k__Bacteria.p__Firmicutes.c__Clostridia.o__Clostridiales.f__Clostridiaceae.g__Clostridium	k__Bacteria.p__Acidobacteria.c__.o__.f__.g__Thermoanaerobaculum
k__Bacteria.p__Proteobacteria.c__Alphaproteobacteria.o__Caulobacterales.f__Caulobacteraceae.g__Phenylobacterium	k__Bacteria.p__Acidobacteria.c__Acidobacteriia.o__Acidobacteriales.f__Acidobacteriaceae.g__
k__Bacteria.p__Actinobacteria.c__Actinobacteria.o__Pseudonocardiales.f__Pseudonocardiaceae.g__Actinomycetospora	k__Bacteria.p__Acidobacteria.c__Acidobacteriia.o__Acidobacteriales.f__Acidobacteriaceae.g__Terriglobus
k__Archaea.p__Crenarchaeota.c__Thermoprotei.o__Thermoproteales.f__Thermoproteaceae.g__Vulcanisaeta	k__Bacteria.p__Acidobacteria.c__Blastocatellia.o__.f__.g__Pyrinomonas
k__Bacteria.p__Proteobacteria.c__Gammaproteobacteria.o__Enterobacteriales.f__Enterobacteriaceae.g__Sodalis	k__Bacteria.p__Acidobacteria.c__Holophagae.o__Holophagales.f__Holophagaceae.g__Geothrix
k__Bacteria.p__Proteobacteria.c__Betaproteobacteria.o__Neisseriales.f__Neisseriaceae.g__Kingella	k__Bacteria.p__Actinobacteria.c__Acidimicrobiia.o__Acidimicrobiales.f__Acidimicrobiaceae.g__Acidithrix
k__Bacteria.p__Tenericutes.c__Mollicutes.o__Entomoplasmatales.f__Spiroplasmataceae.g__Spiroplasma	k__Bacteria.p__Actinobacteria.c__Actinobacteria.o__Actinomycetales.f__Actinomycetaceae.g__Actinomyces
k__Bacteria.p__Acidobacteria.c__Holophagae.o__Holophagales.f__Holophagaceae.g__Holophaga	k__Bacteria.p__Actinobacteria.c__Actinobacteria.o__Actinomycetales.f__Actinomycetaceae.g__Arcanobacterium
k__Bacteria.p__Proteobacteria.c__Betaproteobacteria.o__Burkholderiales.f__Comamonadaceae.g__Pelomonas	k__Bacteria.p__Actinobacteria.c__Actinobacteria.o__Actinomycetales.f__Actinomycetaceae.g__Trueperella
k__Bacteria.p__Firmicutes.c__Negativicutes.g__Anaerosporomusa	k__Bacteria.p__Actinobacteria.c__Actinobacteria.o__Actinopolysporales.f__Actinopolysporaceae.g__Actinopolyspora
k__Bacteria.p__Proteobacteria.c__Gammaproteobacteria.o__Oceanospirillales.f__Alcanivoracaceae.g__Alcanivorax	k__Bacteria.p__Actinobacteria.c__Actinobacteria.o__Bifidobacteriales.f__Bifidobacteriaceae.g__Bifidobacterium
k__Bacteria.p__Acidobacteria.c__Solibacteres.o__Solibacterales.f__Solibacteraceae.g__Candidatus_Solibacter	k__Bacteria.p__Actinobacteria.c__Actinobacteria.o__Bifidobacteriales.f__Bifidobacteriaceae.g__Gardnerella
k__Bacteria.p__Spirochaetes.c__Spirochaetia.f__Leptospiraceae.g__Leptospira	k__Bacteria.p__Actinobacteria.c__Actinobacteria.o__Bifidobacteriales.f__Bifidobacteriaceae.g__Parascardovia
k__Bacteria.p__Acidobacteria.c__Acidobacteriia.o__Acidobacteriales.f__Acidobacteriaceae.g__Candidatus_Koribacter	k__Bacteria.p__Actinobacteria.c__Actinobacteria.o__Catenulisporales.f__Actinospicaceae.g__Actinospica
k__Bacteria.p__Proteobacteria.c__Gammaproteobacteria.o__Xanthomonadales.f__Xanthomonadaceae.g__Luteimonas	k__Bacteria.p__Actinobacteria.c__Actinobacteria.o__Catenulisporales.f__Catenulisporaceae.g__Catenulispora
k__Archaea.p__Euryarchaeota.c__Halobacteria.o__Halobacteriales.f__Halobacteriaceae.g__Halococcus	k__Bacteria.p__Actinobacteria.c__Actinobacteria.o__Corynebacteriales.f__.g__Lawsonella
k__Archaea.p__Euryarchaeota.c__Thermoplasmata.o__Thermoplasmatales.f__Picrophilaceae.g__Picrophilus	k__Bacteria.p__Actinobacteria.c__Actinobacteria.o__Corynebacteriales.f__.g__Tomitella
k__Bacteria.p__Firmicutes.c__Clostridia.o__Clostridiales.f__Lachnospiraceae.g__Marvinbryantia	k__Bacteria.p__Actinobacteria.c__Actinobacteria.o__Corynebacteriales.f__Corynebacteriaceae.g__Corynebacterium
k__Archaea.p__Crenarchaeota.c__Thermoprotei.o__Desulfurococcales.f__Desulfurococcaceae.g__Ignicoccus	k__Bacteria.p__Actinobacteria.c__Actinobacteria.o__Corynebacteriales.f__Corynebacteriaceae.g__Turicella
k__Bacteria.p__Acidobacteria.c__Blastocatellia.g__Chloracidobacterium	k__Bacteria.p__Actinobacteria.c__Actinobacteria.o__Corynebacteriales.f__Gordoniaceae.g__Gordonia
k__Bacteria.p__Actinobacteria.c__Actinobacteria.o__Micrococcales.f__Microbacteriaceae.g__Microbacterium	k__Bacteria.p__Actinobacteria.c__Actinobacteria.o__Corynebacteriales.f__Gordoniaceae.g__Millisia
k__Bacteria.p__Chlamydiae.c__Chlamydiia.o__Chlamydiales.f__Chlamydiaceae.g__Chlamydia	k__Bacteria.p__Actinobacteria.c__Actinobacteria.o__Corynebacteriales.f__Mycobacteriaceae.g__Hoyosella
k__Bacteria.p__Firmicutes.c__Clostridia.o__Clostridiales.f__Clostridiaceae.g__Youngiibacter	k__Bacteria.p__Actinobacteria.c__Actinobacteria.o__Corynebacteriales.f__Nocardiaceae.g__Nocardia
k__Bacteria.p__Proteobacteria.c__Alphaproteobacteria.o__Rhodobacterales.f__Rhodobacteraceae.g__Ponticoccus	k__Bacteria.p__Actinobacteria.c__Actinobacteria.o__Corynebacteriales.f__Nocardiaceae.g__Rhodococcus
k__Bacteria.p__Firmicutes.c__Clostridia.o__Clostridiales.f__Clostridiales_Family_XIII._Incertae_Sedis.g__Mogibacterium	k__Bacteria.p__Actinobacteria.c__Actinobacteria.o__Corynebacteriales.f__Segniliparaceae.g__Segniliparus
k__Bacteria.p__Proteobacteria.c__Gammaproteobacteria.o__Enterobacteriales.f__Enterobacteriaceae.g__Pectobacterium	k__Bacteria.p__Actinobacteria.c__Actinobacteria.o__Corynebacteriales.f__Tsukamurellaceae.g__Tsukamurella
k__Bacteria.p__Actinobacteria.c__Actinobacteria.o__Streptomycetales.f__Streptomycetaceae.g__Streptomyces	k__Bacteria.p__Actinobacteria.c__Actinobacteria.o__Corynebacteriales.f__Williamsiaceae.g__Williamsia
k__Bacteria.p__Bacteroidetes.c__Chitinophagia.o__Chitinophagales.f__Saprospiraceae.g__Lewinella	k__Bacteria.p__Actinobacteria.c__Actinobacteria.o__Frankiales.f__Cryptosporangiaceae.g__Cryptosporangium
k__Bacteria.p__Deinococcus.Thermus.c__Deinococci.o__Thermales.f__Thermaceae.g__Meiothermus	k__Bacteria.p__Actinobacteria.c__Actinobacteria.o__Frankiales.f__Frankiaceae.g__Frankia
k__Bacteria.p__Chloroflexi.c__Thermomicrobia.o__Thermomicrobiales.f__Thermomicrobiaceae.g__Thermomicrobium	k__Bacteria.p__Actinobacteria.c__Actinobacteria.o__Frankiales.f__Sporichthyaceae.g__Sporichthya
k__Bacteria.p__Proteobacteria.c__Deltaproteobacteria.o__Desulfovibrionales.f__Desulfovibrionaceae.g__Desulfocurvus	k__Bacteria.p__Actinobacteria.c__Actinobacteria.o__Geodermatophilales.f__Geodermatophilaceae.g__Modestobacter
k__Bacteria.p__Actinobacteria.c__Actinobacteria.o__Micrococcales.f__Microbacteriaceae.g__Salinibacterium	k__Bacteria.p__Actinobacteria.c__Actinobacteria.o__Glycomycetales.f__Glycomycetaceae.g__Glycomyces
k__Bacteria.p__Chlamydiae.c__Chlamydiia.o__Chlamydiales.f__Parachlamydiaceae.g__Parachlamydia	k__Bacteria.p__Actinobacteria.c__Actinobacteria.o__Glycomycetales.f__Glycomycetaceae.g__Stackebrandtia
k__Bacteria.p__Actinobacteria.c__Actinobacteria.o__Actinomycetales.f__Actinomycetaceae.g__Trueperella	k__Bacteria.p__Actinobacteria.c__Actinobacteria.o__Micrococcales.f__Brevibacteriaceae.g__Brevibacterium
k__Bacteria.p__Proteobacteria.c__Betaproteobacteria.o__Burkholderiales.f__Burkholderiaceae.g__Paraburkholderia	k__Bacteria.p__Actinobacteria.c__Actinobacteria.o__Micrococcales.f__Cellulomonadaceae.g__Actinotalea
k__Bacteria.p__Proteobacteria.c__Gammaproteobacteria.o__Enterobacteriales.f__Enterobacteriaceae.g__Candidatus_Ishikawaella	k__Bacteria.p__Actinobacteria.c__Actinobacteria.o__Micrococcales.f__Cellulomonadaceae.g__Oerskovia
k__Bacteria.p__Firmicutes.c__Bacilli.o__Lactobacillales.f__Streptococcaceae.g__Streptococcus	k__Bacteria.p__Actinobacteria.c__Actinobacteria.o__Micrococcales.f__Dermabacteraceae.g__Brachybacterium
k__Bacteria.p__Proteobacteria.c__Gammaproteobacteria.o__Cellvibrionales.f__Porticoccaceae.g__Porticoccus	k__Bacteria.p__Actinobacteria.c__Actinobacteria.o__Micrococcales.f__Dermabacteraceae.g__Dermabacter
k__Bacteria.p__Bacteroidetes.c__Chitinophagia.o__Chitinophagales.f__Chitinophagaceae.g__Niastella	k__Bacteria.p__Actinobacteria.c__Actinobacteria.o__Micrococcales.f__Dermabacteraceae.g__Devriesea
k__Bacteria.p__Proteobacteria.c__Alphaproteobacteria.o__Rhodospirillales.f__Acetobacteraceae.g__Kozakia	k__Bacteria.p__Actinobacteria.c__Actinobacteria.o__Micrococcales.f__Dermacoccaceae.g__Demetria
k__Bacteria.p__Proteobacteria.c__Gammaproteobacteria.o__Pseudomonadales.f__Pseudomonadaceae.g__Oblitimonas	k__Bacteria.p__Actinobacteria.c__Actinobacteria.o__Micrococcales.f__Dermacoccaceae.g__Dermacoccus
k__Bacteria.p__Proteobacteria.c__Gammaproteobacteria.o__Chromatiales.f__Chromatiaceae.g__Nitrosococcus	k__Bacteria.p__Actinobacteria.c__Actinobacteria.o__Micrococcales.f__Dermacoccaceae.g__Luteipulveratus
k__Bacteria.p__Actinobacteria.c__Actinobacteria.o__Glycomycetales.f__Glycomycetaceae.g__Stackebrandtia	k__Bacteria.p__Actinobacteria.c__Actinobacteria.o__Micrococcales.f__Dermatophilaceae.g__Dermatophilus
k__Bacteria.p__Proteobacteria.c__Gammaproteobacteria.o__Xanthomonadales.f__Xanthomonadaceae.g__Stenotrophomonas	k__Bacteria.p__Actinobacteria.c__Actinobacteria.o__Micrococcales.f__Dermatophilaceae.g__Piscicoccus
k__Bacteria.p__Proteobacteria.c__Gammaproteobacteria.o__Enterobacteriales.f__Enterobacteriaceae.g__Raoultella	k__Bacteria.p__Actinobacteria.c__Actinobacteria.o__Micrococcales.f__Intrasporangiaceae.g__Intrasporangium
k__Bacteria.p__Verrucomicrobia.c__Spartobacteria.g__Candidatus_Xiphinematobacter	k__Bacteria.p__Actinobacteria.c__Actinobacteria.o__Micrococcales.f__Intrasporangiaceae.g__Knoellia
k__Bacteria.p__Proteobacteria.c__Gammaproteobacteria.o__Thiotrichales.f__Francisellaceae.g__Francisella	k__Bacteria.p__Actinobacteria.c__Actinobacteria.o__Micrococcales.f__Intrasporangiaceae.g__Kribbia
k__Bacteria.p__Proteobacteria.c__Gammaproteobacteria.o__Vibrionales.f__Vibrionaceae.g__Grimontia	k__Bacteria.p__Actinobacteria.c__Actinobacteria.o__Micrococcales.f__Intrasporangiaceae.g__Phycicoccus
k__Bacteria.p__Proteobacteria.c__Gammaproteobacteria.o__Cellvibrionales.f__Cellvibrionaceae.g__Teredinibacter	k__Bacteria.p__Actinobacteria.c__Actinobacteria.o__Micrococcales.f__Intrasporangiaceae.g__Serinicoccus
k__Bacteria.p__Proteobacteria.c__Gammaproteobacteria.o__Enterobacteriales.f__Enterobacteriaceae.g__Arsenophonus	k__Bacteria.p__Actinobacteria.c__Actinobacteria.o__Micrococcales.f__Intrasporangiaceae.g__Tetrasphaera
k__Archaea.p__Euryarchaeota.c__Thermococci.o__Thermococcales.f__Thermococcaceae.g__Thermococcus	k__Bacteria.p__Actinobacteria.c__Actinobacteria.o__Micrococcales.f__Jonesiaceae.g__Jonesia
k__Bacteria.p__Synergistetes.c__Synergistia.o__Synergistales.f__Synergistaceae.g__Synergistes	k__Bacteria.p__Actinobacteria.c__Actinobacteria.o__Micrococcales.f__Microbacteriaceae.g__Agreia
k__Bacteria.p__Proteobacteria.c__Gammaproteobacteria.o__Enterobacteriales.f__Enterobacteriaceae.g__Moellerella	k__Bacteria.p__Actinobacteria.c__Actinobacteria.o__Micrococcales.f__Microbacteriaceae.g__Agromyces
k__Bacteria.p__Bacteroidetes.c__Cytophagia.o__Cytophagales.f__Flammeovirgaceae.g__Flexithrix	k__Bacteria.p__Actinobacteria.c__Actinobacteria.o__Micrococcales.f__Microbacteriaceae.g__Cryocola
k__Bacteria.p__Actinobacteria.c__Actinobacteria.o__Corynebacteriales.f__Mycobacteriaceae.g__Mycobacterium	k__Bacteria.p__Actinobacteria.c__Actinobacteria.o__Micrococcales.f__Microbacteriaceae.g__Curtobacterium
k__Bacteria.p__Actinobacteria.c__Actinobacteria.o__Micrococcales.f__Dermatophilaceae.g__Kineosphaera	k__Bacteria.p__Actinobacteria.c__Actinobacteria.o__Micrococcales.f__Microbacteriaceae.g__Frigoribacterium
k__Archaea.p__Euryarchaeota.c__Halobacteria.o__Halobacteriales.f__Halobacteriaceae.g__Halobacterium	k__Bacteria.p__Actinobacteria.c__Actinobacteria.o__Micrococcales.f__Microbacteriaceae.g__Frondihabitans
k__Bacteria.p__Proteobacteria.c__Betaproteobacteria.o__Burkholderiales.g__Methylibium	k__Bacteria.p__Actinobacteria.c__Actinobacteria.o__Micrococcales.f__Microbacteriaceae.g__Gryllotalpicola
k__Bacteria.p__Fusobacteria.c__Fusobacteriia.o__Fusobacteriales.f__Fusobacteriaceae.g__Fusobacterium	k__Bacteria.p__Actinobacteria.c__Actinobacteria.o__Micrococcales.f__Microbacteriaceae.g__Herbiconiux
k__Bacteria.p__Proteobacteria.c__Alphaproteobacteria.o__Rickettsiales.f__Anaplasmataceae.g__Ehrlichia	k__Bacteria.p__Actinobacteria.c__Actinobacteria.o__Micrococcales.f__Microbacteriaceae.g__Leifsonia
k__Bacteria.p__Proteobacteria.c__Gammaproteobacteria.o__Enterobacteriales.f__Enterobacteriaceae.g__Proteus	k__Bacteria.p__Actinobacteria.c__Actinobacteria.o__Micrococcales.f__Microbacteriaceae.g__Leucobacter
k__Bacteria.p__Proteobacteria.c__Gammaproteobacteria.o__Enterobacteriales.f__Enterobacteriaceae.g__Citrobacter	k__Bacteria.p__Actinobacteria.c__Actinobacteria.o__Micrococcales.f__Microbacteriaceae.g__Microbacterium
k__Bacteria.p__Actinobacteria.c__Actinobacteria.o__Micrococcales.f__Ruaniaceae.g__Ruania	k__Bacteria.p__Actinobacteria.c__Actinobacteria.o__Micrococcales.f__Microbacteriaceae.g__Mycetocola
k__Bacteria.p__Proteobacteria.c__Epsilonproteobacteria.o__Campylobacterales.f__Campylobacteraceae.g__Campylobacter	k__Bacteria.p__Actinobacteria.c__Actinobacteria.o__Micrococcales.f__Microbacteriaceae.g__Plantibacter
k__Bacteria.p__Proteobacteria.c__Gammaproteobacteria.o__Chromatiales.f__Ectothiorhodospiraceae.g__Halorhodospira	k__Bacteria.p__Actinobacteria.c__Actinobacteria.o__Micrococcales.f__Microbacteriaceae.g__Rathayibacter
k__Archaea.p__Euryarchaeota.c__Archaeoglobi.o__Archaeoglobales.f__Archaeoglobaceae.g__Ferroglobus	k__Bacteria.p__Actinobacteria.c__Actinobacteria.o__Micrococcales.f__Microbacteriaceae.g__Rhodoluna
k__Bacteria.p__Actinobacteria.c__Actinobacteria.o__Micromonosporales.f__Micromonosporaceae.g__Pilimelia	k__Bacteria.p__Actinobacteria.c__Actinobacteria.o__Micrococcales.f__Micrococcaceae.g__Acaricomes
k__Bacteria.p__Bacteroidetes.c__Flavobacteriia.o__Flavobacteriales.f__Flavobacteriaceae.g__Flavobacterium	k__Bacteria.p__Actinobacteria.c__Actinobacteria.o__Micrococcales.f__Micrococcaceae.g__Arthrobacter
k__Bacteria.p__Firmicutes.c__Bacilli.o__Bacillales.f__Staphylococcaceae.g__Staphylococcus	k__Bacteria.p__Actinobacteria.c__Actinobacteria.o__Micrococcales.f__Micrococcaceae.g__Glutamicibacter
k__Bacteria.p__Actinobacteria.c__Actinobacteria.o__Micrococcales.f__Dermacoccaceae.g__Luteipulveratus	k__Bacteria.p__Actinobacteria.c__Actinobacteria.o__Micrococcales.f__Micrococcaceae.g__Kocuria
k__Bacteria.p__Firmicutes.c__Clostridia.o__Thermoanaerobacterales.f__Thermoanaerobacteraceae.g__Caldanaerobius	k__Bacteria.p__Actinobacteria.c__Actinobacteria.o__Micrococcales.f__Micrococcaceae.g__Micrococcus
k__Bacteria.p__Proteobacteria.c__Gammaproteobacteria.o__Alteromonadales.f__Alteromonadaceae.g__Glaciecola	k__Bacteria.p__Actinobacteria.c__Actinobacteria.o__Micrococcales.f__Micrococcaceae.g__Neomicrococcus
k__Archaea.p__Crenarchaeota.c__Thermoprotei.o__Desulfurococcales.f__Desulfurococcaceae.g__Staphylothermus	k__Bacteria.p__Actinobacteria.c__Actinobacteria.o__Micrococcales.f__Micrococcaceae.g__Nesterenkonia
k__Bacteria.p__Proteobacteria.c__Alphaproteobacteria.o__Rhodobacterales.f__Rhodobacteraceae.g__Nautella	k__Bacteria.p__Actinobacteria.c__Actinobacteria.o__Micrococcales.f__Micrococcaceae.g__Paeniglutamicibacter
k__Bacteria.p__Firmicutes.c__Clostridia.o__Thermoanaerobacterales.f__Thermoanaerobacteraceae.g__Ammonifex	k__Bacteria.p__Actinobacteria.c__Actinobacteria.o__Micrococcales.f__Micrococcaceae.g__Pseudarthrobacter
k__Bacteria.p__Proteobacteria.c__Alphaproteobacteria.o__Rhizobiales.f__Rhizobiaceae.g__Agrobacterium	k__Bacteria.p__Actinobacteria.c__Actinobacteria.o__Micrococcales.f__Micrococcaceae.g__Renibacterium
k__Bacteria.p__Proteobacteria.c__Alphaproteobacteria.o__Rhodobacterales.f__Rhodobacteraceae.g__Planktomarina	k__Bacteria.p__Actinobacteria.c__Actinobacteria.o__Micrococcales.f__Micrococcaceae.g__Rothia
k__Archaea.p__Euryarchaeota.c__Thermococci.o__Thermococcales.f__Thermococcaceae.g__Palaeococcus	k__Bacteria.p__Actinobacteria.c__Actinobacteria.o__Micrococcales.f__Promicromonosporaceae.g__Cellulosimicrobium
k__Bacteria.p__Bacteroidetes.c__Bacteroidia.o__Bacteroidales.f__Porphyromonadaceae.g__Barnesiella	k__Bacteria.p__Actinobacteria.c__Actinobacteria.o__Micrococcales.f__Promicromonosporaceae.g__Promicromonospora
k__Bacteria.p__Proteobacteria.c__Gammaproteobacteria.o__Enterobacteriales.f__Enterobacteriaceae.g__Providencia	k__Bacteria.p__Actinobacteria.c__Actinobacteria.o__Micromonosporales.f__Micromonosporaceae.g__Actinoplanes
k__Bacteria.p__Bacteroidetes.c__Flavobacteriia.o__Flavobacteriales.f__Flavobacteriaceae.g__Ornithobacterium	k__Bacteria.p__Actinobacteria.c__Actinobacteria.o__Micromonosporales.f__Micromonosporaceae.g__Asanoa
k__Bacteria.p__Proteobacteria.c__Alphaproteobacteria.o__Rhodospirillales.f__Rhodospirillaceae.g__Azospirillum	k__Bacteria.p__Actinobacteria.c__Actinobacteria.o__Micromonosporales.f__Micromonosporaceae.g__Longispora
k__Bacteria.p__Proteobacteria.c__Gammaproteobacteria.o__Pseudomonadales.f__Moraxellaceae.g__Acinetobacter	k__Bacteria.p__Actinobacteria.c__Actinobacteria.o__Micromonosporales.f__Micromonosporaceae.g__Micromonospora
k__Bacteria.p__Actinobacteria.c__Actinobacteria.o__Micrococcales.f__Dermabacteraceae.g__Dermabacter	k__Bacteria.p__Actinobacteria.c__Actinobacteria.o__Micromonosporales.f__Micromonosporaceae.g__Pilimelia
k__Bacteria.p__Proteobacteria.c__Alphaproteobacteria.o__Rhizobiales.f__Xanthobacteraceae.g__Ancylobacter	k__Bacteria.p__Actinobacteria.c__Actinobacteria.o__Propionibacteriales.f__Nocardioidaceae.g__Kribbella
k__Bacteria.p__Synergistetes.c__Synergistia.o__Synergistales.f__Synergistaceae.g__Aminomonas	k__Bacteria.p__Actinobacteria.c__Actinobacteria.o__Propionibacteriales.f__Nocardioidaceae.g__Nocardioides
k__Bacteria.p__Proteobacteria.c__Gammaproteobacteria.o__Vibrionales.f__Vibrionaceae.g__Candidatus_Photodesmus	k__Bacteria.p__Actinobacteria.c__Actinobacteria.o__Propionibacteriales.f__Propionibacteriaceae.g__
k__Bacteria.p__Proteobacteria.c__Gammaproteobacteria.o__Enterobacteriales.f__Enterobacteriaceae.g__Rahnella	k__Bacteria.p__Actinobacteria.c__Actinobacteria.o__Propionibacteriales.f__Propionibacteriaceae.g__Microlunatus
k__Archaea.p__Euryarchaeota.c__Halobacteria.o__Halobacteriales.f__Halobacteriaceae.g__Halorhabdus	k__Bacteria.p__Actinobacteria.c__Actinobacteria.o__Propionibacteriales.f__Propionibacteriaceae.g__Propionibacterium
k__Bacteria.p__Proteobacteria.c__Betaproteobacteria.o__Burkholderiales.g__Rubrivivax	k__Bacteria.p__Actinobacteria.c__Actinobacteria.o__Propionibacteriales.f__Propionibacteriaceae.g__Propionimicrobium
k__Bacteria.p__Proteobacteria.c__Gammaproteobacteria.o__Alteromonadales.f__Pseudoalteromonadaceae.g__Algicola	k__Bacteria.p__Actinobacteria.c__Actinobacteria.o__Propionibacteriales.f__Propionibacteriaceae.g__Tessaracoccus
k__Bacteria.p__Caldiserica.c__Caldisericia.o__Caldisericales.f__Caldisericaceae.g__Caldisericum	k__Bacteria.p__Actinobacteria.c__Actinobacteria.o__Pseudonocardiales.f__Pseudonocardiaceae.g__Actinoalloteichus
k__Bacteria.p__Actinobacteria.c__Coriobacteriia.o__Coriobacteriales.f__Coriobacteriaceae.g__Senegalimassilia	k__Bacteria.p__Actinobacteria.c__Actinobacteria.o__Pseudonocardiales.f__Pseudonocardiaceae.g__Actinosynnema
k__Bacteria.p__Proteobacteria.c__Gammaproteobacteria.o__Methylococcales.f__Methylococcaceae.g__Methylobacter	k__Bacteria.p__Actinobacteria.c__Actinobacteria.o__Pseudonocardiales.f__Pseudonocardiaceae.g__Amycolatopsis
k__Bacteria.p__Proteobacteria.c__Gammaproteobacteria.o__Nevskiales.f__Sinobacteraceae.g__Solimonas	k__Bacteria.p__Actinobacteria.c__Actinobacteria.o__Pseudonocardiales.f__Pseudonocardiaceae.g__Kutzneria
k__Archaea.p__Euryarchaeota.c__Halobacteria.o__Natrialbales.f__Natrialbaceae.g__Haloterrigena	k__Bacteria.p__Actinobacteria.c__Actinobacteria.o__Pseudonocardiales.f__Pseudonocardiaceae.g__Lentzea
k__Bacteria.p__Actinobacteria.c__Actinobacteria.o__Micromonosporales.f__Micromonosporaceae.g__Catenuloplanes	k__Bacteria.p__Actinobacteria.c__Actinobacteria.o__Pseudonocardiales.f__Pseudonocardiaceae.g__Prauserella
k__Bacteria.p__Aquificae.c__Aquificae.o__Aquificales.f__Aquificaceae.g__Thermocrinis	k__Bacteria.p__Actinobacteria.c__Actinobacteria.o__Pseudonocardiales.f__Pseudonocardiaceae.g__Pseudonocardia
k__Bacteria.p__Proteobacteria.c__Gammaproteobacteria.o__Pasteurellales.f__Pasteurellaceae.g__Mannheimia	k__Bacteria.p__Actinobacteria.c__Actinobacteria.o__Pseudonocardiales.f__Pseudonocardiaceae.g__Saccharomonospora
k__Bacteria.p__Proteobacteria.c__Gammaproteobacteria.o__Alteromonadales.f__Moritellaceae.g__Moritella	k__Bacteria.p__Actinobacteria.c__Actinobacteria.o__Pseudonocardiales.f__Pseudonocardiaceae.g__Saccharopolyspora
k__Bacteria.p__Proteobacteria.c__Epsilonproteobacteria.o__Campylobacterales.f__Helicobacteraceae.g__Sulfurimonas	k__Bacteria.p__Actinobacteria.c__Actinobacteria.o__Pseudonocardiales.f__Pseudonocardiaceae.g__Saccharothrix
k__Bacteria.p__Firmicutes.c__Negativicutes.o__Selenomonadales.f__Selenomonadaceae.g__Mitsuokella	k__Bacteria.p__Actinobacteria.c__Actinobacteria.o__Streptomycetales.f__Streptomycetaceae.g__
k__Bacteria.p__Firmicutes.c__Clostridia.o__Clostridiales.g__Flavonifractor	k__Bacteria.p__Actinobacteria.c__Actinobacteria.o__Streptomycetales.f__Streptomycetaceae.g__Streptomyces
k__Bacteria.p__Bacteroidetes.o__Bacteroidetes_Order_II._Incertae_sedis.f__Rhodothermaceae.g__Salisaeta	k__Bacteria.p__Actinobacteria.c__Actinobacteria.o__Streptosporangiales.f__Nocardiopsaceae.g__Nocardiopsis
k__Bacteria.p__Proteobacteria.c__Gammaproteobacteria.o__Pasteurellales.f__Pasteurellaceae.g__Avibacterium	k__Bacteria.p__Actinobacteria.c__Actinobacteria.o__Streptosporangiales.f__Nocardiopsaceae.g__Streptomonospora
k__Bacteria.p__Deinococcus.Thermus.c__Deinococci.o__Deinococcales.f__Deinococcaceae.g__Deinococcus	k__Bacteria.p__Actinobacteria.c__Actinobacteria.o__Streptosporangiales.f__Streptosporangiaceae.g__Herbidospora
k__Archaea.p__Thaumarchaeota.g__Candidatus_Nitrosopelagicus	k__Bacteria.p__Actinobacteria.c__Actinobacteria.o__Streptosporangiales.f__Streptosporangiaceae.g__Microbispora
k__Bacteria.p__Proteobacteria.c__Gammaproteobacteria.o__Enterobacteriales.f__Enterobacteriaceae.g__Candidatus_Hamiltonella	k__Bacteria.p__Actinobacteria.c__Actinobacteria.o__Streptosporangiales.f__Streptosporangiaceae.g__Nonomuraea
k__Bacteria.p__Proteobacteria.c__Gammaproteobacteria.o__Vibrionales.f__Vibrionaceae.g__Photobacterium	k__Bacteria.p__Actinobacteria.c__Actinobacteria.o__Streptosporangiales.f__Streptosporangiaceae.g__Planobispora
k__Bacteria.p__Proteobacteria.c__Zetaproteobacteria.o__Mariprofundales.f__Mariprofundaceae.g__Mariprofundus	k__Bacteria.p__Actinobacteria.c__Actinobacteria.o__Streptosporangiales.f__Streptosporangiaceae.g__Streptosporangium
k__Bacteria.p__Bacteroidetes.c__Bacteroidia.o__Bacteroidales.f__Prevotellaceae.g__Prevotella	k__Bacteria.p__Actinobacteria.c__Actinobacteria.o__Streptosporangiales.f__Thermomonosporaceae.g__Actinomadura
k__Bacteria.p__Bacteroidetes.c__Flavobacteriia.o__Flavobacteriales.f__Flavobacteriaceae.g__Elizabethkingia	k__Bacteria.p__Actinobacteria.c__Actinobacteria.o__Streptosporangiales.f__Thermomonosporaceae.g__Spirillospora
k__Bacteria.p__Proteobacteria.c__Gammaproteobacteria.o__Alteromonadales.f__Alteromonadaceae.g__Alteromonas	k__Bacteria.p__Actinobacteria.c__Actinobacteria.o__Streptosporangiales.f__Thermomonosporaceae.g__Thermomonospora
k__Bacteria.p__Proteobacteria.c__Alphaproteobacteria.o__Caulobacterales.f__Caulobacteraceae.g__Caulobacter	k__Bacteria.p__Actinobacteria.c__Coriobacteriia.o__Coriobacteriales.f__.g__
k__Bacteria.p__Proteobacteria.c__Alphaproteobacteria.o__Rhodobacterales.f__Rhodobacteraceae.g__Rhodobacter	k__Bacteria.p__Actinobacteria.c__Coriobacteriia.o__Coriobacteriales.f__Atopobiaceae.g__Atopobium
k__Bacteria.p__Cyanobacteria.o__Chroococcales.g__Aphanocapsa	k__Bacteria.p__Actinobacteria.c__Coriobacteriia.o__Coriobacteriales.f__Atopobiaceae.g__Olsenella
k__Bacteria.p__Cyanobacteria.o__Nostocales.f__Rivulariaceae.g__Rivularia	k__Bacteria.p__Actinobacteria.c__Coriobacteriia.o__Coriobacteriales.f__Coriobacteriaceae.g__Senegalimassilia
k__Bacteria.p__Proteobacteria.c__Betaproteobacteria.o__Neisseriales.f__Chromobacteriaceae.g__Chromobacterium	k__Bacteria.p__Actinobacteria.c__Coriobacteriia.o__Eggerthellales.f__Eggerthellaceae.g__Adlercreutzia
k__Bacteria.p__Chloroflexi.c__Ardenticatenia.o__Ardenticatenales.f__Ardenticatenaceae.g__Ardenticatena	k__Bacteria.p__Actinobacteria.c__Coriobacteriia.o__Eggerthellales.f__Eggerthellaceae.g__Cryptobacterium
k__Bacteria.p__Proteobacteria.c__Gammaproteobacteria.o__Pseudomonadales.f__Moraxellaceae.g__Psychrobacter	k__Bacteria.p__Actinobacteria.c__Coriobacteriia.o__Eggerthellales.f__Eggerthellaceae.g__Eggerthella
k__Bacteria.p__Bacteroidetes.c__Cytophagia.o__Cytophagales.f__Cyclobacteriaceae.g__Indibacter	k__Bacteria.p__Actinobacteria.c__Coriobacteriia.o__Eggerthellales.f__Eggerthellaceae.g__Gordonibacter
k__Bacteria.p__Bacteroidetes.c__Flavobacteriia.o__Flavobacteriales.f__Flavobacteriaceae.g__Flagellimonas	k__Bacteria.p__Actinobacteria.c__Coriobacteriia.o__Eggerthellales.f__Eggerthellaceae.g__Slackia
k__Bacteria.p__Proteobacteria.c__Gammaproteobacteria.o__Alteromonadales.f__Alteromonadaceae.g__Agarivorans	k__Bacteria.p__Armatimonadetes.c__Chthonomonadetes.o__Chthonomonadales.f__Chthonomonadaceae.g__Chthonomonas
k__Bacteria.p__Proteobacteria.c__Alphaproteobacteria.o__Rhizobiales.f__Rhizobiaceae.g__Rhizobium	k__Bacteria.p__Armatimonadetes.c__Fimbriimonadia.o__Fimbriimonadales.f__Fimbriimonadaceae.g__Fimbriimonas
k__Bacteria.p__Firmicutes.c__Erysipelotrichia.o__Erysipelotrichales.f__Erysipelotrichaceae.g__Bulleidia	k__Bacteria.p__Bacteroidetes.c__.o__.f__.g__
k__Archaea.p__Euryarchaeota.c__Halobacteria.o__Natrialbales.f__Natrialbaceae.g__Natronorubrum	k__Bacteria.p__Bacteroidetes.c__Bacteroidia.o__Bacteroidales.f__.g__
k__Archaea.p__Crenarchaeota.c__Thermoprotei.o__Thermoproteales.f__Thermoproteaceae.g__Thermoproteus	k__Bacteria.p__Bacteroidetes.c__Bacteroidia.o__Bacteroidales.f__Bacteroidaceae.g__Mediterranea
k__Bacteria.p__Proteobacteria.c__Gammaproteobacteria.o__Oceanospirillales.f__Saccharospirillaceae.g__Reinekea	k__Bacteria.p__Bacteroidetes.c__Bacteroidia.o__Bacteroidales.f__Lentimicrobiaceae.g__Lentimicrobium
k__Bacteria.p__Proteobacteria.c__Gammaproteobacteria.o__Salinisphaerales.f__Salinisphaeraceae.g__Salinisphaera	k__Bacteria.p__Bacteroidetes.c__Bacteroidia.o__Bacteroidales.f__Marinifilaceae.g__Marinifilum
k__Bacteria.p__Proteobacteria.c__Gammaproteobacteria.o__Enterobacteriales.f__Enterobacteriaceae.g__Yersinia	k__Bacteria.p__Bacteroidetes.c__Bacteroidia.o__Bacteroidales.f__Marinilabiliaceae.g__Anaerophaga
k__Archaea.p__Euryarchaeota.c__Methanomicrobia.o__Methanomicrobiales.f__Methanomicrobiaceae.g__Methanolacinia	k__Bacteria.p__Bacteroidetes.c__Bacteroidia.o__Bacteroidales.f__Marinilabiliaceae.g__Geofilum
k__Bacteria.p__Proteobacteria.c__Gammaproteobacteria.o__Pasteurellales.f__Pasteurellaceae.g__Pasteurella	k__Bacteria.p__Bacteroidetes.c__Bacteroidia.o__Bacteroidales.f__Marinilabiliaceae.g__Marinilabilia
k__Bacteria.p__Proteobacteria.c__Betaproteobacteria.o__Burkholderiales.f__Comamonadaceae.g__Comamonas	k__Bacteria.p__Bacteroidetes.c__Bacteroidia.o__Bacteroidales.f__Odoribacteraceae.g__Butyricimonas
k__Bacteria.p__Bacteroidetes.c__Flavobacteriia.o__Flavobacteriales.f__Flavobacteriaceae.g__Gaetbulibacter	k__Bacteria.p__Bacteroidetes.c__Bacteroidia.o__Bacteroidales.f__Odoribacteraceae.g__Odoribacter
k__Bacteria.p__Proteobacteria.c__Gammaproteobacteria.g__Wohlfahrtiimonas	k__Bacteria.p__Bacteroidetes.c__Bacteroidia.o__Bacteroidales.f__Porphyromonadaceae.g__
k__Bacteria.p__Proteobacteria.c__Gammaproteobacteria.o__Oceanospirillales.f__Oceanospirillaceae.g__Oleispira	k__Bacteria.p__Bacteroidetes.c__Bacteroidia.o__Bacteroidales.f__Porphyromonadaceae.g__Dysgonomonas
k__Bacteria.p__Bacteroidetes.c__Bacteroidia.o__Bacteroidales.f__Marinilabiliaceae.g__Marinilabilia	k__Bacteria.p__Bacteroidetes.c__Bacteroidia.o__Bacteroidales.f__Porphyromonadaceae.g__Fermentimonas
k__Bacteria.p__Proteobacteria.c__Gammaproteobacteria.o__Vibrionales.f__Vibrionaceae.g__Vibrio	k__Bacteria.p__Bacteroidetes.c__Bacteroidia.o__Bacteroidales.f__Porphyromonadaceae.g__Porphyromonas
k__Bacteria.p__Bacteroidetes.c__Flavobacteriia.o__Flavobacteriales.f__Cryomorphaceae.g__Owenweeksia	k__Bacteria.p__Bacteroidetes.c__Bacteroidia.o__Bacteroidales.f__Porphyromonadaceae.g__Tannerella
k__Bacteria.p__Bacteroidetes.c__Bacteroidia.o__Bacteroidales.f__Lentimicrobiaceae.g__Lentimicrobium	k__Bacteria.p__Bacteroidetes.c__Bacteroidia.o__Bacteroidales.f__Prevotellaceae.g__Alloprevotella
k__Bacteria.p__Proteobacteria.c__Betaproteobacteria.o__Rhodocyclales.f__Rhodocyclaceae.g__Methyloversatilis	k__Bacteria.p__Bacteroidetes.c__Bacteroidia.o__Bacteroidales.f__Prevotellaceae.g__Prevotella
k__Archaea.p__Euryarchaeota.c__Halobacteria.o__Haloferacales.f__Haloferacaceae.g__Haloquadratum	k__Bacteria.p__Bacteroidetes.c__Bacteroidia.o__Bacteroidales.f__Prolixibacteraceae.g__Tangfeifania
k__Bacteria.p__Bacteroidetes.c__Flavobacteriia.o__Flavobacteriales.f__Flavobacteriaceae.g__Olleya	k__Bacteria.p__Bacteroidetes.c__Bacteroidia.o__Bacteroidales.f__Rikenellaceae.g__Alistipes
k__Bacteria.p__Proteobacteria.c__Alphaproteobacteria.o__Rhodobacterales.f__Rhodobacteraceae.g__Shimia	k__Bacteria.p__Bacteroidetes.c__Bacteroidia.o__Bacteroidales.f__Rikenellaceae.g__Mucinivorans
k__Bacteria.p__Proteobacteria.c__Gammaproteobacteria.o__Enterobacteriales.f__Enterobacteriaceae.g__Buchnera	k__Bacteria.p__Bacteroidetes.c__Chitinophagia.o__Chitinophagales.f__Chitinophagaceae.g__
k__Bacteria.p__Proteobacteria.c__Gammaproteobacteria.o__Thiotrichales.g__Fangia	k__Bacteria.p__Bacteroidetes.c__Chitinophagia.o__Chitinophagales.f__Chitinophagaceae.g__Chitinophaga
k__Bacteria.p__Ignavibacteriae.c__Ignavibacteria.o__Ignavibacteriales.f__Melioribacteraceae.g__Melioribacter	k__Bacteria.p__Bacteroidetes.c__Chitinophagia.o__Chitinophagales.f__Chitinophagaceae.g__Flavisolibacter
k__Bacteria.p__Proteobacteria.c__Gammaproteobacteria.o__Chromatiales.f__Chromatiaceae.g__Thiohalocapsa	k__Bacteria.p__Bacteroidetes.c__Chitinophagia.o__Chitinophagales.f__Chitinophagaceae.g__Hydrotalea
k__Bacteria.p__Synergistetes.c__Synergistia.o__Synergistales.f__Synergistaceae.g__Aminiphilus	k__Bacteria.p__Bacteroidetes.c__Chitinophagia.o__Chitinophagales.f__Chitinophagaceae.g__Sediminibacterium
k__Bacteria.p__Bacteroidetes.c__Bacteroidia.o__Bacteroidales.f__Rikenellaceae.g__Rikenella	k__Bacteria.p__Bacteroidetes.c__Chitinophagia.o__Chitinophagales.f__Chitinophagaceae.g__Segetibacter
k__Archaea.p__Euryarchaeota.c__Halobacteria.o__Natrialbales.f__Natrialbaceae.g__Natronolimnobius	k__Bacteria.p__Bacteroidetes.c__Cytophagia.o__Cytophagales.f__Cyclobacteriaceae.g__Algoriphagus
k__Bacteria.p__Proteobacteria.c__Gammaproteobacteria.o__Thiotrichales.f__Piscirickettsiaceae.g__Thioalkalimicrobium	k__Bacteria.p__Bacteroidetes.c__Cytophagia.o__Cytophagales.f__Cyclobacteriaceae.g__Belliella
k__Bacteria.p__Thermotogae.c__Thermotogae.o__Petrotogales.g__Petrotoga	k__Bacteria.p__Bacteroidetes.c__Cytophagia.o__Cytophagales.f__Cyclobacteriaceae.g__Cecembia
k__Bacteria.p__Spirochaetes.c__Spirochaetia.o__Spirochaetales.f__Spirochaetaceae.g__Treponema	k__Bacteria.p__Bacteroidetes.c__Cytophagia.o__Cytophagales.f__Cyclobacteriaceae.g__Cyclobacterium
k__Bacteria.p__Actinobacteria.c__Actinobacteria.o__Micrococcales.f__Microbacteriaceae.g__Cryocola	k__Bacteria.p__Bacteroidetes.c__Cytophagia.o__Cytophagales.f__Cyclobacteriaceae.g__Echinicola
k__Bacteria.p__Proteobacteria.c__Betaproteobacteria.o__Burkholderiales.f__Alcaligenaceae.g__Taylorella	k__Bacteria.p__Bacteroidetes.c__Cytophagia.o__Cytophagales.f__Cytophagaceae.g__Anditalea
k__Bacteria.p__Proteobacteria.c__Gammaproteobacteria.o__Orbales.f__Orbaceae.g__Gilliamella	k__Bacteria.p__Bacteroidetes.c__Cytophagia.o__Cytophagales.f__Cytophagaceae.g__Cytophaga
k__Bacteria.p__Proteobacteria.c__Betaproteobacteria.o__Burkholderiales.f__Comamonadaceae.g__Pseudorhodoferax	k__Bacteria.p__Bacteroidetes.c__Cytophagia.o__Cytophagales.f__Cytophagaceae.g__Dyadobacter
k__Bacteria.p__Actinobacteria.c__Actinobacteria.o__Micromonosporales.f__Micromonosporaceae.g__Micromonospora	k__Bacteria.p__Bacteroidetes.c__Cytophagia.o__Cytophagales.f__Cytophagaceae.g__Fibrella
k__Bacteria.p__Actinobacteria.c__Actinobacteria.o__Actinomycetales.f__Actinomycetaceae.g__Actinotignum	k__Bacteria.p__Bacteroidetes.c__Cytophagia.o__Cytophagales.f__Cytophagaceae.g__Fibrisoma
k__Bacteria.p__Actinobacteria.c__Actinobacteria.o__Streptosporangiales.f__Streptosporangiaceae.g__Microtetraspora	k__Bacteria.p__Bacteroidetes.c__Cytophagia.o__Cytophagales.f__Cytophagaceae.g__Leadbetterella
k__Bacteria.p__Proteobacteria.c__Gammaproteobacteria.o__Legionellales.f__Legionellaceae.g__Legionella	k__Bacteria.p__Bacteroidetes.c__Cytophagia.o__Cytophagales.f__Cytophagaceae.g__Rudanella
k__Bacteria.p__Firmicutes.c__Bacilli.o__Bacillales.f__Bacillaceae.g__Bacillus	k__Bacteria.p__Bacteroidetes.c__Cytophagia.o__Cytophagales.f__Cytophagaceae.g__Runella
k__Bacteria.p__Firmicutes.c__Clostridia.o__Clostridiales.f__Ruminococcaceae.g__Subdoligranulum	k__Bacteria.p__Bacteroidetes.c__Cytophagia.o__Cytophagales.f__Flammeovirgaceae.g__Flammeovirga
k__Bacteria.p__Proteobacteria.c__Gammaproteobacteria.o__Xanthomonadales.f__Xanthomonadaceae.g__Lysobacter	k__Bacteria.p__Bacteroidetes.c__Cytophagia.o__Cytophagales.f__Flammeovirgaceae.g__Flexithrix
k__Bacteria.p__Proteobacteria.c__Betaproteobacteria.o__Burkholderiales.g__Ideonella	k__Bacteria.p__Bacteroidetes.c__Cytophagia.o__Cytophagales.f__Flammeovirgaceae.g__Marivirga
k__Bacteria.p__Bacteroidetes.c__Bacteroidia.o__Bacteroidales.f__Bacteroidaceae.g__Bacteroides	k__Bacteria.p__Bacteroidetes.c__Cytophagia.o__Cytophagales.f__Flammeovirgaceae.g__Nafulsella
k__Bacteria.p__Chloroflexi.c__Anaerolineae.o__Anaerolineales.f__Anaerolineaceae.g__Levilinea	k__Bacteria.p__Bacteroidetes.c__Cytophagia.o__Cytophagales.f__Flammeovirgaceae.g__Reichenbachiella
k__Bacteria.p__Proteobacteria.c__Gammaproteobacteria.o__Alteromonadales.f__Alteromonadaceae.g__Paraglaciecola	k__Bacteria.p__Bacteroidetes.c__Cytophagia.o__Cytophagales.f__Flammeovirgaceae.g__Roseivirga
k__Bacteria.p__Proteobacteria.c__Gammaproteobacteria.o__Cellvibrionales.f__Spongiibacteraceae.g__Spongiibacter	k__Bacteria.p__Bacteroidetes.c__Cytophagia.o__Cytophagales.f__Hymenobacteraceae.g__Rufibacter
k__Bacteria.p__Firmicutes.c__Bacilli.o__Lactobacillales.f__Enterococcaceae.g__Catellicoccus	k__Bacteria.p__Bacteroidetes.c__Cytophagia.o__Cytophagales.f__Microscillaceae.g__Eisenibacter
k__Bacteria.p__Proteobacteria.c__Gammaproteobacteria.o__Enterobacteriales.f__Enterobacteriaceae.g__Pantoea	k__Bacteria.p__Bacteroidetes.c__Flavobacteriia.o__Flavobacteriales.f__.g__
k__Bacteria.p__Proteobacteria.c__Betaproteobacteria.o__Burkholderiales.f__Alcaligenaceae.g__Achromobacter	k__Bacteria.p__Bacteroidetes.c__Flavobacteriia.o__Flavobacteriales.f__Blattabacteriaceae.g__Blattabacterium
k__Bacteria.p__Firmicutes.c__Negativicutes.o__Selenomonadales.f__Selenomonadaceae.g__Centipeda	k__Bacteria.p__Bacteroidetes.c__Flavobacteriia.o__Flavobacteriales.f__Crocinitomicaceae.g__Fluviicola
k__Bacteria.p__Proteobacteria.c__Gammaproteobacteria.o__Thiotrichales.f__Piscirickettsiaceae.g__Methylophaga	k__Bacteria.p__Bacteroidetes.c__Flavobacteriia.o__Flavobacteriales.f__Cryomorphaceae.g__Owenweeksia
k__Archaea.p__Euryarchaeota.c__Halobacteria.o__Haloferacales.f__Haloferacaceae.g__Halogeometricum	k__Bacteria.p__Bacteroidetes.c__Flavobacteriia.o__Flavobacteriales.f__Flavobacteriaceae.g__
k__Archaea.p__Euryarchaeota.c__Halobacteria.o__Halobacteriales.f__Halobacteriaceae.g__Halomicrobium	k__Bacteria.p__Bacteroidetes.c__Flavobacteriia.o__Flavobacteriales.f__Flavobacteriaceae.g__Aequorivita
k__Bacteria.p__Proteobacteria.c__Gammaproteobacteria.o__Xanthomonadales.f__Rhodanobacteraceae.g__Luteibacter	k__Bacteria.p__Bacteroidetes.c__Flavobacteriia.o__Flavobacteriales.f__Flavobacteriaceae.g__Algibacter
k__Bacteria.p__Firmicutes.c__Clostridia.o__Thermoanaerobacterales.f__Thermoanaerobacterales_Family_III._Incertae_Sedis.g__Caldicellulosiruptor	k__Bacteria.p__Bacteroidetes.c__Flavobacteriia.o__Flavobacteriales.f__Flavobacteriaceae.g__Altibacter
k__Bacteria.p__Proteobacteria.c__Gammaproteobacteria.o__Enterobacteriales.f__Enterobacteriaceae.g__Shigella	k__Bacteria.p__Bacteroidetes.c__Flavobacteriia.o__Flavobacteriales.f__Flavobacteriaceae.g__Aquimarina
k__Bacteria.p__Actinobacteria.c__Actinobacteria.o__Pseudonocardiales.f__Pseudonocardiaceae.g__Prauserella	k__Bacteria.p__Bacteroidetes.c__Flavobacteriia.o__Flavobacteriales.f__Flavobacteriaceae.g__Arenibacter
k__Bacteria.p__Proteobacteria.c__Betaproteobacteria.o__Burkholderiales.f__Comamonadaceae.g__Hylemonella	k__Bacteria.p__Bacteroidetes.c__Flavobacteriia.o__Flavobacteriales.f__Flavobacteriaceae.g__Arenitalea
k__Bacteria.p__Proteobacteria.c__Deltaproteobacteria.o__Desulfurellales.f__Desulfurellaceae.g__Desulfurella	k__Bacteria.p__Bacteroidetes.c__Flavobacteriia.o__Flavobacteriales.f__Flavobacteriaceae.g__Bergeyella
k__Bacteria.p__Actinobacteria.c__Actinobacteria.o__Micrococcales.f__Intrasporangiaceae.g__Tetrasphaera	k__Bacteria.p__Bacteroidetes.c__Flavobacteriia.o__Flavobacteriales.f__Flavobacteriaceae.g__Capnocytophaga
k__Bacteria.p__Proteobacteria.c__Deltaproteobacteria.o__Desulfobacterales.f__Desulfobacteraceae.g__Desulfotignum	k__Bacteria.p__Bacteroidetes.c__Flavobacteriia.o__Flavobacteriales.f__Flavobacteriaceae.g__Chishuiella
k__Bacteria.p__Chlorobi.c__Chlorobia.o__Chlorobiales.f__Chlorobiaceae.g__Prosthecochloris	k__Bacteria.p__Bacteroidetes.c__Flavobacteriia.o__Flavobacteriales.f__Flavobacteriaceae.g__Chryseobacterium
k__Archaea.p__Crenarchaeota.c__Thermoprotei.o__Sulfolobales.f__Sulfolobaceae.g__Sulfolobus	k__Bacteria.p__Bacteroidetes.c__Flavobacteriia.o__Flavobacteriales.f__Flavobacteriaceae.g__Cloacibacterium
k__Bacteria.p__Proteobacteria.c__Deltaproteobacteria.o__Syntrophobacterales.f__Syntrophaceae.g__Desulfobacca	k__Bacteria.p__Bacteroidetes.c__Flavobacteriia.o__Flavobacteriales.f__Flavobacteriaceae.g__Cruoricaptor
k__Bacteria.p__Firmicutes.c__Bacilli.o__Bacillales.f__Planococcaceae.g__Paenisporosarcina	k__Bacteria.p__Bacteroidetes.c__Flavobacteriia.o__Flavobacteriales.f__Flavobacteriaceae.g__Empedobacter
k__Bacteria.p__Cyanobacteria.o__Chroococcales.g__Dactylococcopsis	k__Bacteria.p__Bacteroidetes.c__Flavobacteriia.o__Flavobacteriales.f__Flavobacteriaceae.g__Eudoraea
k__Bacteria.p__Actinobacteria.c__Actinobacteria.o__Corynebacteriales.f__Nocardiaceae.g__Rhodococcus	k__Bacteria.p__Bacteroidetes.c__Flavobacteriia.o__Flavobacteriales.f__Flavobacteriaceae.g__Flavobacterium
k__Bacteria.p__Proteobacteria.c__Gammaproteobacteria.o__Oceanospirillales.f__Halomonadaceae.g__Cobetia	k__Bacteria.p__Bacteroidetes.c__Flavobacteriia.o__Flavobacteriales.f__Flavobacteriaceae.g__Formosa
k__Bacteria.p__Proteobacteria.c__Gammaproteobacteria.o__Alteromonadales.f__Pseudoalteromonadaceae.g__Pseudoalteromonas	k__Bacteria.p__Bacteroidetes.c__Flavobacteriia.o__Flavobacteriales.f__Flavobacteriaceae.g__Gelidibacter
k__Bacteria.p__Proteobacteria.c__Gammaproteobacteria.o__Oceanospirillales.f__Oceanospirillaceae.g__Marinomonas	k__Bacteria.p__Bacteroidetes.c__Flavobacteriia.o__Flavobacteriales.f__Flavobacteriaceae.g__Gillisia
k__Bacteria.p__Proteobacteria.c__Deltaproteobacteria.o__Desulfobacterales.f__Desulfobacteraceae.g__Desulfatitalea	k__Bacteria.p__Bacteroidetes.c__Flavobacteriia.o__Flavobacteriales.f__Flavobacteriaceae.g__Gramella
k__Bacteria.p__Proteobacteria.c__Alphaproteobacteria.o__Rhizobiales.f__Bradyrhizobiaceae.g__Bosea	k__Bacteria.p__Bacteroidetes.c__Flavobacteriia.o__Flavobacteriales.f__Flavobacteriaceae.g__Kordia
k__Archaea.p__Euryarchaeota.c__Methanobacteria.o__Methanobacteriales.f__Methanobacteriaceae.g__Methanobrevibacter	k__Bacteria.p__Bacteroidetes.c__Flavobacteriia.o__Flavobacteriales.f__Flavobacteriaceae.g__Lacinutrix
k__Bacteria.p__Actinobacteria.c__Actinobacteria.o__Streptosporangiales.f__Thermomonosporaceae.g__Thermomonospora	k__Bacteria.p__Bacteroidetes.c__Flavobacteriia.o__Flavobacteriales.f__Flavobacteriaceae.g__Mangrovimonas
k__Bacteria.p__Proteobacteria.c__Alphaproteobacteria.o__Rhodobacterales.f__Rhodobacteraceae.g__Sedimentitalea	k__Bacteria.p__Bacteroidetes.c__Flavobacteriia.o__Flavobacteriales.f__Flavobacteriaceae.g__Maribacter
k__Bacteria.p__Proteobacteria.c__Gammaproteobacteria.o__Alteromonadales.f__Colwelliaceae.g__Thalassotalea	k__Bacteria.p__Bacteroidetes.c__Flavobacteriia.o__Flavobacteriales.f__Flavobacteriaceae.g__Ochrovirga
k__Bacteria.p__Verrucomicrobia.c__Opitutae.o__Opitutales.f__Opitutaceae.g__Diplosphaera	k__Bacteria.p__Bacteroidetes.c__Flavobacteriia.o__Flavobacteriales.f__Flavobacteriaceae.g__Olleya
k__Bacteria.p__Actinobacteria.c__Actinobacteria.o__Actinomycetales.f__Actinomycetaceae.g__Actinomyces	k__Bacteria.p__Bacteroidetes.c__Flavobacteriia.o__Flavobacteriales.f__Flavobacteriaceae.g__Polaribacter
k__Bacteria.p__Bacteroidetes.c__Sphingobacteriia.o__Sphingobacteriales.f__Sphingobacteriaceae.g__Sphingobacterium	k__Bacteria.p__Bacteroidetes.c__Flavobacteriia.o__Flavobacteriales.f__Flavobacteriaceae.g__Pseudozobellia
k__Bacteria.p__Proteobacteria.c__Gammaproteobacteria.o__Alteromonadales.f__Idiomarinaceae.g__Idiomarina	k__Bacteria.p__Bacteroidetes.c__Flavobacteriia.o__Flavobacteriales.f__Flavobacteriaceae.g__Psychroflexus
k__Bacteria.p__Firmicutes.c__Bacilli.o__Lactobacillales.f__Lactobacillaceae.g__Lactobacillus	k__Bacteria.p__Bacteroidetes.c__Flavobacteriia.o__Flavobacteriales.f__Flavobacteriaceae.g__Psychroserpens
k__Archaea.p__Euryarchaeota.c__Methanomicrobia.o__Methanomicrobiales.f__Methanoregulaceae.g__Methanoregula	k__Bacteria.p__Bacteroidetes.c__Flavobacteriia.o__Flavobacteriales.f__Flavobacteriaceae.g__Riemerella
k__Bacteria.p__Proteobacteria.c__Gammaproteobacteria.o__Oceanospirillales.f__Oceanospirillaceae.g__Marinobacterium	k__Bacteria.p__Bacteroidetes.c__Flavobacteriia.o__Flavobacteriales.f__Flavobacteriaceae.g__Salegentibacter
k__Bacteria.p__Bacteroidetes.c__Bacteroidia.o__Bacteroidales.f__Porphyromonadaceae.g__Porphyromonas	k__Bacteria.p__Bacteroidetes.c__Flavobacteriia.o__Flavobacteriales.f__Flavobacteriaceae.g__Seonamhaeicola
k__Bacteria.p__Proteobacteria.c__Betaproteobacteria.o__Rhodocyclales.f__Rhodocyclaceae.g__Thauera	k__Bacteria.p__Bacteroidetes.c__Flavobacteriia.o__Flavobacteriales.f__Flavobacteriaceae.g__Siansivirga
k__Bacteria.p__Proteobacteria.c__Gammaproteobacteria.o__Enterobacteriales.f__Enterobacteriaceae.g__Candidatus_Riesia	k__Bacteria.p__Bacteroidetes.c__Flavobacteriia.o__Flavobacteriales.f__Flavobacteriaceae.g__Spongiibacterium
k__Archaea.p__Euryarchaeota.c__Methanomicrobia.o__Methanosarcinales.f__Methanosarcinaceae.g__Methanohalophilus	k__Bacteria.p__Bacteroidetes.c__Flavobacteriia.o__Flavobacteriales.f__Flavobacteriaceae.g__Tamlana
k__Bacteria.p__Proteobacteria.c__Gammaproteobacteria.o__Enterobacteriales.f__Enterobacteriaceae.g__Xenorhabdus	k__Bacteria.p__Bacteroidetes.c__Flavobacteriia.o__Flavobacteriales.f__Flavobacteriaceae.g__Tenacibaculum
k__Bacteria.p__Firmicutes.c__Bacilli.o__Bacillales.f__Bacillaceae.g__Salsuginibacillus	k__Bacteria.p__Bacteroidetes.c__Flavobacteriia.o__Flavobacteriales.f__Flavobacteriaceae.g__Vaginella
k__Bacteria.p__Firmicutes.c__Negativicutes.o__Veillonellales.f__Veillonellaceae.g__Veillonella	k__Bacteria.p__Bacteroidetes.c__Flavobacteriia.o__Flavobacteriales.f__Flavobacteriaceae.g__Winogradskyella
k__Bacteria.p__Proteobacteria.c__Gammaproteobacteria.o__Enterobacteriales.f__Enterobacteriaceae.g__Erwinia	k__Bacteria.p__Bacteroidetes.c__Flavobacteriia.o__Flavobacteriales.f__Flavobacteriaceae.g__Xanthomarina
k__Bacteria.p__Proteobacteria.c__Betaproteobacteria.o__Burkholderiales.f__Burkholderiaceae.g__Burkholderia	k__Bacteria.p__Bacteroidetes.c__Saprospiria.o__Saprospirales.f__Haliscomenobacteraceae.g__Haliscomenobacter
k__Archaea.p__Crenarchaeota.c__Thermoprotei.o__Desulfurococcales.f__Desulfurococcaceae.g__Desulfurococcus	k__Bacteria.p__Bacteroidetes.c__Saprospiria.o__Saprospirales.f__Lewinellaceae.g__Lewinella
k__Bacteria.p__Proteobacteria.c__Alphaproteobacteria.o__Rhodobacterales.f__Rhodobacteraceae.g__Wenxinia	k__Bacteria.p__Bacteroidetes.c__Saprospiria.o__Saprospirales.f__Saprospiraceae.g__Saprospira
k__Bacteria.p__Bacteroidetes.c__Flavobacteriia.o__Flavobacteriales.f__Flavobacteriaceae.g__Capnocytophaga	k__Bacteria.p__Bacteroidetes.c__Sphingobacteriia.o__Sphingobacteriales.f__.g__
k__Bacteria.p__Planctomycetes.c__Planctomycetia.o__Planctomycetales.f__Planctomycetaceae.g__Gimesia	k__Bacteria.p__Bacteroidetes.c__Sphingobacteriia.o__Sphingobacteriales.f__Sphingobacteriaceae.g__Arcticibacter
k__Bacteria.p__Proteobacteria.c__Betaproteobacteria.o__Burkholderiales.f__Burkholderiaceae.g__Cupriavidus	k__Bacteria.p__Bacteroidetes.c__Sphingobacteriia.o__Sphingobacteriales.f__Sphingobacteriaceae.g__Pedobacter
k__Archaea.p__Euryarchaeota.c__Thermoplasmata.o__Methanomassiliicoccales.f__Methanomassiliicoccaceae.g__Candidatus_Methanoplasma	k__Bacteria.p__Balneolaeota.c__Balneolia.o__Balneolales.f__Balneolaceae.g__Balneola
k__Bacteria.p__Proteobacteria.c__Gammaproteobacteria.o__Chromatiales.f__Ectothiorhodospiraceae.g__Ectothiorhodospira	k__Bacteria.p__Balneolaeota.c__Balneolia.o__Balneolales.f__Balneolaceae.g__Gracilimonas
k__Bacteria.p__Actinobacteria.c__Coriobacteriia.o__Eggerthellales.f__Eggerthellaceae.g__Denitrobacterium	k__Bacteria.p__Calditrichaeota.c__Calditrichae.o__Calditrichales.f__Calditrichaceae.g__Caldithrix
k__Bacteria.p__Actinobacteria.c__Actinobacteria.o__Actinomycetales.f__Actinomycetaceae.g__Varibaculum	k__Bacteria.p__Candidatus_Cloacimonetes.c__.o__.f__.g__Candidatus_Cloacimonas
k__Bacteria.p__Proteobacteria.c__Gammaproteobacteria.o__Alteromonadales.f__Alteromonadaceae.g__Alishewanella	k__Bacteria.p__Candidatus_Kryptonia.c__.o__.f__.g__Candidatus_Kryptonium
k__Bacteria.p__Proteobacteria.c__Betaproteobacteria.o__Burkholderiales.f__Comamonadaceae.g__Ramlibacter	k__Bacteria.p__Chlamydiae.c__Chlamydiia.o__Chlamydiales.f__Chlamydiaceae.g__Chlamydia
k__Bacteria.p__Proteobacteria.c__Alphaproteobacteria.o__Caulobacterales.f__Caulobacteraceae.g__Brevundimonas	k__Bacteria.p__Chlamydiae.c__Chlamydiia.o__Parachlamydiales.f__Parachlamydiaceae.g__Neochlamydia
k__Bacteria.p__Proteobacteria.c__Gammaproteobacteria.o__Enterobacteriales.f__Enterobacteriaceae.g__Klebsiella	k__Bacteria.p__Chlamydiae.c__Chlamydiia.o__Parachlamydiales.f__Simkaniaceae.g__Simkania
k__Archaea.p__Euryarchaeota.c__Halobacteria.o__Halobacteriales.f__Halobacteriaceae.g__Halosimplex	k__Bacteria.p__Chlamydiae.c__Chlamydiia.o__Parachlamydiales.f__Waddliaceae.g__Waddlia
k__Bacteria.p__Bacteroidetes.c__Bacteroidia.o__Bacteroidales.f__Prevotellaceae.g__Paraprevotella	k__Bacteria.p__Chlorobi.c__Chlorobia.o__Chlorobiales.f__Chlorobiaceae.g__Chlorobaculum
k__Archaea.p__Euryarchaeota.c__Thermoplasmata.o__Methanomassiliicoccales.f__Methanomassiliicoccaceae.g__Candidatus_Methanomethylophilus	k__Bacteria.p__Chlorobi.c__Chlorobia.o__Chlorobiales.f__Chlorobiaceae.g__Prosthecochloris
k__Bacteria.p__Proteobacteria.c__Betaproteobacteria.o__Burkholderiales.g__Sphaerotilus	k__Bacteria.p__Chloroflexi.c__Anaerolineae.o__Anaerolineales.f__Anaerolineaceae.g__Anaerolinea
k__Bacteria.p__Aquificae.c__Aquificae.o__Aquificales.f__Aquificaceae.g__Aquifex	k__Bacteria.p__Chloroflexi.c__Anaerolineae.o__Anaerolineales.f__Anaerolineaceae.g__Bellilinea
k__Bacteria.p__Bacteroidetes.c__Flavobacteriia.o__Flavobacteriales.f__Blattabacteriaceae.g__Blattabacterium	k__Bacteria.p__Chloroflexi.c__Anaerolineae.o__Anaerolineales.f__Anaerolineaceae.g__Flexilinea
k__Bacteria.p__Actinobacteria.c__Coriobacteriia.o__Eggerthellales.f__Eggerthellaceae.g__Adlercreutzia	k__Bacteria.p__Chloroflexi.c__Ardenticatenia.o__Ardenticatenales.f__Ardenticatenaceae.g__Ardenticatena
k__Bacteria.p__Proteobacteria.c__Gammaproteobacteria.o__Enterobacteriales.f__Enterobacteriaceae.g__Buttiauxella	k__Bacteria.p__Chloroflexi.c__Chloroflexia.o__Herpetosiphonales.f__Herpetosiphonaceae.g__Herpetosiphon
k__Bacteria.p__Proteobacteria.c__Alphaproteobacteria.o__Sphingomonadales.f__Sphingomonadaceae.g__Sphingobium	k__Bacteria.p__Chloroflexi.c__Dehalococcoidia.o__.f__.g__Dehalogenimonas
k__Bacteria.p__Firmicutes.c__Erysipelotrichia.o__Erysipelotrichales.f__Erysipelotrichaceae.g__Dielma	k__Bacteria.p__Chloroflexi.c__Thermomicrobia.o__Sphaerobacterales.f__Sphaerobacteraceae.g__Nitrolancea
k__Bacteria.p__Firmicutes.c__Bacilli.o__Bacillales.f__Bacillaceae.g__Amphibacillus	k__Bacteria.p__Chrysiogenetes.c__Chrysiogenetes.o__Chrysiogenales.f__Chrysiogenaceae.g__Chrysiogenes
k__Bacteria.p__Proteobacteria.c__Gammaproteobacteria.o__Enterobacteriales.f__Enterobacteriaceae.g__Dickeya	k__Bacteria.p__Chrysiogenetes.c__Chrysiogenetes.o__Chrysiogenales.f__Chrysiogenaceae.g__Desulfurispirillum
k__Bacteria.p__Proteobacteria.c__Gammaproteobacteria.o__Cellvibrionales.f__Cellvibrionaceae.g__Marinagarivorans	k__Bacteria.p__Cyanobacteria.c__.o__Chroococcales.f__Aphanothecaceae.g__Candidatus_Atelocyanobacterium
k__Bacteria.p__Proteobacteria.c__Alphaproteobacteria.o__Rhodobacterales.f__Rhodobacteraceae.g__Paracoccus	k__Bacteria.p__Cyanobacteria.c__.o__Chroococcales.f__Chroococcaceae.g__Geminocystis
k__Bacteria.p__Proteobacteria.c__Gammaproteobacteria.o__Pasteurellales.f__Pasteurellaceae.g__Aggregatibacter	k__Bacteria.p__Cyanobacteria.c__.o__Chroococcidiopsidales.f__Chroococcidiopsidaceae.g__Chroococcidiopsis
k__Archaea.p__Euryarchaeota.g__Aciduliprofundum	k__Bacteria.p__Cyanobacteria.c__.o__Gloeoemargaritales.f__Gloeomargaritaceae.g__Gloeomargarita
k__Bacteria.p__Planctomycetes.c__Planctomycetia.o__Candidatus_Brocadiales.f__Candidatus_Brocadiaceae.g__Candidatus_Jettenia	k__Bacteria.p__Cyanobacteria.c__.o__Nostocales.f__Aphanizomenonaceae.g__Dolichospermum
k__Bacteria.p__Proteobacteria.c__Gammaproteobacteria.o__Alteromonadales.f__Psychromonadaceae.g__Psychromonas	k__Bacteria.p__Cyanobacteria.c__.o__Nostocales.f__Chlorogloeopsidaceae.g__Chlorogloeopsis
k__Bacteria.p__Proteobacteria.c__Alphaproteobacteria.o__Sphingomonadales.f__Sphingomonadaceae.g__Citromicrobium	k__Bacteria.p__Cyanobacteria.c__.o__Nostocales.f__Hapalosiphonaceae.g__Fischerella
k__Bacteria.p__Thermodesulfobacteria.c__Thermodesulfobacteria.o__Thermodesulfobacteriales.f__Thermodesulfobacteriaceae.g__Thermodesulfobacterium	k__Bacteria.p__Cyanobacteria.c__.o__Nostocales.f__Hapalosiphonaceae.g__Hapalosiphon
k__Bacteria.g__Thermobaculum	k__Bacteria.p__Cyanobacteria.c__.o__Nostocales.f__Nostocaceae.g__Anabaena
k__Bacteria.p__Firmicutes.c__Erysipelotrichia.o__Erysipelotrichales.f__Erysipelotrichaceae.g__Erysipelatoclostridium	k__Bacteria.p__Cyanobacteria.c__.o__Nostocales.f__Nostocaceae.g__Nostoc
k__Bacteria.p__Firmicutes.c__Bacilli.o__Bacillales.f__Bacillaceae.g__Geobacillus	k__Bacteria.p__Cyanobacteria.c__.o__Nostocales.f__Nostocaceae.g__Richelia
k__Bacteria.p__Proteobacteria.c__Gammaproteobacteria.o__Nevskiales.f__Sinobacteraceae.g__Nevskia	k__Bacteria.p__Cyanobacteria.c__.o__Nostocales.f__Nostocaceae.g__Trichormus
k__Bacteria.p__Proteobacteria.c__Alphaproteobacteria.o__Rhizobiales.f__Methylobacteriaceae.g__Microvirga	k__Bacteria.p__Cyanobacteria.c__.o__Nostocales.f__Rivulariaceae.g__Calothrix
k__Bacteria.p__Proteobacteria.c__Gammaproteobacteria.o__Thiotrichales.f__Piscirickettsiaceae.g__Piscirickettsia	k__Bacteria.p__Cyanobacteria.c__.o__Nostocales.f__Rivulariaceae.g__Rivularia
k__Bacteria.p__Proteobacteria.c__Gammaproteobacteria.o__Enterobacteriales.f__Enterobacteriaceae.g__Candidatus_Blochmannia	k__Bacteria.p__Cyanobacteria.c__.o__Nostocales.f__Scytonemataceae.g__Scytonema
k__Bacteria.p__Spirochaetes.c__Spirochaetia.f__Leptospiraceae.g__Turneriella	k__Bacteria.p__Cyanobacteria.c__.o__Nostocales.f__Symphyonemataceae.g__Mastigocladopsis
k__Bacteria.p__Bacteroidetes.c__Flavobacteriia.o__Flavobacteriales.f__Flavobacteriaceae.g__Altibacter	k__Bacteria.p__Cyanobacteria.c__.o__Oscillatoriales.f__.g__
k__Bacteria.p__Bacteroidetes.c__Sphingobacteriia.o__Sphingobacteriales.f__Sphingobacteriaceae.g__Arcticibacter	k__Bacteria.p__Cyanobacteria.c__.o__Oscillatoriales.f__Coleofasciculaceae.g__Geitlerinema
k__Bacteria.p__Actinobacteria.c__Actinobacteria.o__Micrococcales.f__Promicromonosporaceae.g__Cellulosimicrobium	k__Bacteria.p__Cyanobacteria.c__.o__Oscillatoriales.f__Cyanothecaceae.g__Cyanothece
k__Bacteria.p__Proteobacteria.c__Gammaproteobacteria.o__Aeromonadales.f__Aeromonadaceae.g__Aeromonas	k__Bacteria.p__Cyanobacteria.c__.o__Oscillatoriales.f__Gomontiellaceae.g__Crinalium
k__Bacteria.p__Proteobacteria.c__Gammaproteobacteria.o__Thiotrichales.f__Piscirickettsiaceae.g__Thiomicrospira	k__Bacteria.p__Cyanobacteria.c__.o__Oscillatoriales.f__Microcoleaceae.g__Microcoleus
k__Bacteria.p__Actinobacteria.c__Actinobacteria.o__Micrococcales.f__Micrococcaceae.g__Micrococcus	k__Bacteria.p__Cyanobacteria.c__.o__Oscillatoriales.f__Microcoleaceae.g__Trichodesmium
k__Bacteria.p__Planctomycetes.c__Planctomycetia.o__Planctomycetales.f__Planctomycetaceae.g__Gemmata	k__Bacteria.p__Cyanobacteria.c__.o__Oscillatoriales.f__Oscillatoriaceae.g__Oscillatoria
k__Bacteria.p__Firmicutes.c__Clostridia.o__Clostridiales.f__Peptococcaceae.g__Candidatus_Desulforudis	k__Bacteria.p__Cyanobacteria.c__.o__Oscillatoriales.f__Oscillatoriaceae.g__Phormidium
k__Bacteria.p__Bacteroidetes.c__Flavobacteriia.o__Flavobacteriales.f__Flavobacteriaceae.g__Galbibacter	k__Bacteria.p__Cyanobacteria.c__.o__Pleurocapsales.f__Dermocarpellaceae.g__Stanieria
k__Bacteria.p__Chlamydiae.c__Chlamydiia.o__Chlamydiales.f__Waddliaceae.g__Waddlia	k__Bacteria.p__Cyanobacteria.c__.o__Pleurocapsales.f__Hyellaceae.g__Myxosarcina
k__Bacteria.p__Proteobacteria.c__Gammaproteobacteria.o__Thiotrichales.f__Piscirickettsiaceae.g__Cycloclasticus	k__Bacteria.p__Cyanobacteria.c__.o__Synechococcales.f__Leptolyngbyaceae.g__Neosynechococcus
k__Archaea.p__Candidatus_Korarchaeota.g__Candidatus_Korarchaeum	k__Bacteria.p__Cyanobacteria.c__.o__Synechococcales.f__Leptolyngbyaceae.g__Phormidesmis
k__Archaea.p__Euryarchaeota.c__Thermoplasmata.o__Thermoplasmatales.f__Ferroplasmaceae.g__Acidiplasma	k__Bacteria.p__Cyanobacteria.c__.o__Synechococcales.f__Pseudanabaenaceae.g__Limnothrix
k__Bacteria.p__Proteobacteria.c__Betaproteobacteria.o__Burkholderiales.g__Aquabacterium	k__Bacteria.p__Cyanobacteria.c__.o__Synechococcales.f__Pseudanabaenaceae.g__Prochlorothrix
k__Bacteria.p__Firmicutes.c__Clostridia.o__Clostridiales.f__Clostridiales_Family_XIII._Incertae_Sedis.g__Anaerovorax	k__Bacteria.p__Cyanobacteria.c__.o__Synechococcales.f__Pseudanabaenaceae.g__Pseudanabaena
k__Bacteria.p__Proteobacteria.c__Gammaproteobacteria.o__Alteromonadales.f__Shewanellaceae.g__Shewanella	k__Bacteria.p__Cyanobacteria.c__.o__Synechococcales.f__Synechococcaceae.g__Cyanobium
k__Bacteria.p__Proteobacteria.c__Alphaproteobacteria.o__Rhizobiales.f__Phyllobacteriaceae.g__Mesorhizobium	k__Bacteria.p__Cyanobacteria.c__.o__Synechococcales.f__Synechococcaceae.g__Synechococcus
k__Bacteria.p__Firmicutes.c__Bacilli.o__Bacillales.f__Listeriaceae.g__Listeria	k__Bacteria.p__Cyanobacteria.c__.o__Synechococcales.f__Synechococcaceae.g__Thermosynechococcus
k__Bacteria.p__Bacteroidetes.c__Cytophagia.o__Cytophagales.f__Cyclobacteriaceae.g__Lunatimonas	k__Bacteria.p__Cyanobacteria.c__Gloeobacteria.o__Gloeobacterales.f__Gloeobacteraceae.g__Gloeobacter
k__Bacteria.p__Proteobacteria.c__Alphaproteobacteria.o__Rhodobacterales.f__Rhodobacteraceae.g__Pannonibacter	k__Bacteria.p__Deinococcus.Thermus.c__Deinococci.o__Deinococcales.f__Trueperaceae.g__Truepera
k__Bacteria.p__Proteobacteria.c__Gammaproteobacteria.o__Enterobacteriales.f__Enterobacteriaceae.g__Cronobacter	k__Bacteria.p__Deinococcus.Thermus.c__Deinococci.o__Thermales.f__Thermaceae.g__Meiothermus
k__Bacteria.p__Actinobacteria.c__Actinobacteria.o__Kineosporiales.f__Kineosporiaceae.g__Angustibacter	k__Bacteria.p__Deinococcus.Thermus.c__Deinococci.o__Thermales.f__Thermaceae.g__Thermus
k__Bacteria.p__Proteobacteria.c__Betaproteobacteria.o__Neisseriales.f__Neisseriaceae.g__Neisseria	k__Bacteria.p__Firmicutes.c__Bacilli.o__Bacillales.f__.g__
k__Bacteria.p__Bacteroidetes.c__Bacteroidia.o__Bacteroidales.f__Porphyromonadaceae.g__Paludibacter	k__Bacteria.p__Firmicutes.c__Bacilli.o__Bacillales.f__.g__Exiguobacterium
k__Bacteria.p__Proteobacteria.c__Gammaproteobacteria.o__Enterobacteriales.f__Enterobacteriaceae.g__Salmonella	k__Bacteria.p__Firmicutes.c__Bacilli.o__Bacillales.f__.g__Gemella
k__Bacteria.p__Proteobacteria.c__Gammaproteobacteria.o__Oceanospirillales.f__Halomonadaceae.g__Halomonas	k__Bacteria.p__Firmicutes.c__Bacilli.o__Bacillales.f__Alicyclobacillaceae.g__Effusibacillus
k__Bacteria.p__Planctomycetes.c__Planctomycetia.o__Planctomycetales.f__Planctomycetaceae.g__Blastopirellula	k__Bacteria.p__Firmicutes.c__Bacilli.o__Bacillales.f__Bacillaceae.g__Bacillus
k__Bacteria.p__Proteobacteria.c__Alphaproteobacteria.o__Rhizobiales.f__Xanthobacteraceae.g__Azorhizobium	k__Bacteria.p__Firmicutes.c__Bacilli.o__Bacillales.f__Bacillaceae.g__Caldibacillus
k__Bacteria.p__Actinobacteria.c__Actinobacteria.o__Pseudonocardiales.f__Pseudonocardiaceae.g__Saccharomonospora	k__Bacteria.p__Firmicutes.c__Bacilli.o__Bacillales.f__Bacillaceae.g__Domibacillus
k__Bacteria.p__Proteobacteria.c__Gammaproteobacteria.o__Pasteurellales.f__Pasteurellaceae.g__Actinobacillus	k__Bacteria.p__Firmicutes.c__Bacilli.o__Bacillales.f__Bacillaceae.g__Gracilibacillus
k__Archaea.p__Euryarchaeota.c__Halobacteria.o__Halobacteriales.f__Halobacteriaceae.g__Candidatus_Halobonum	k__Bacteria.p__Firmicutes.c__Bacilli.o__Bacillales.f__Bacillaceae.g__Halobacillus
k__Archaea.p__Euryarchaeota.c__Methanomicrobia.o__Methanosarcinales.f__Methanosaetaceae.g__Methanosaeta	k__Bacteria.p__Firmicutes.c__Bacilli.o__Bacillales.f__Bacillaceae.g__Lysinibacillus
k__Archaea.p__Euryarchaeota.c__Methanobacteria.o__Methanobacteriales.f__Methanobacteriaceae.g__Methanothermobacter	k__Bacteria.p__Firmicutes.c__Bacilli.o__Bacillales.f__Bacillaceae.g__Massilibacterium
k__Bacteria.p__Proteobacteria.c__Gammaproteobacteria.o__Aeromonadales.f__Aeromonadaceae.g__Tolumonas	k__Bacteria.p__Firmicutes.c__Bacilli.o__Bacillales.f__Bacillaceae.g__Oceanobacillus
k__Bacteria.p__Chloroflexi.c__Chloroflexia.o__Chloroflexales.f__Oscillochloridaceae.g__Oscillochloris	k__Bacteria.p__Firmicutes.c__Bacilli.o__Bacillales.f__Bacillaceae.g__Ornithinibacillus
k__Bacteria.p__Proteobacteria.c__Gammaproteobacteria.o__Alteromonadales.f__Ferrimonadaceae.g__Ferrimonas	k__Bacteria.p__Firmicutes.c__Bacilli.o__Bacillales.f__Bacillaceae.g__Paucisalibacillus
k__Archaea.p__Euryarchaeota.c__Archaeoglobi.o__Archaeoglobales.f__Archaeoglobaceae.g__Archaeoglobus	k__Bacteria.p__Firmicutes.c__Bacilli.o__Bacillales.f__Bacillaceae.g__Pontibacillus
k__Bacteria.p__Firmicutes.c__Bacilli.o__Lactobacillales.f__Enterococcaceae.g__Enterococcus	k__Bacteria.p__Firmicutes.c__Bacilli.o__Bacillales.f__Bacillaceae.g__Tepidibacillus
k__Bacteria.p__Cyanobacteria.o__Chroococcales.g__Chamaesiphon	k__Bacteria.p__Firmicutes.c__Bacilli.o__Bacillales.f__Bacillales_Family_X._Incertae_Sedis.g__Thermicanus
k__Bacteria.p__Proteobacteria.c__Alphaproteobacteria.o__Rhizobiales.f__Aurantimonadaceae.g__Aureimonas	k__Bacteria.p__Firmicutes.c__Bacilli.o__Bacillales.f__Listeriaceae.g__Brochothrix
k__Bacteria.p__Proteobacteria.c__Gammaproteobacteria.o__Pseudomonadales.f__Moraxellaceae.g__Moraxella	k__Bacteria.p__Firmicutes.c__Bacilli.o__Bacillales.f__Listeriaceae.g__Listeria
k__Bacteria.p__Proteobacteria.c__Betaproteobacteria.o__Burkholderiales.f__Comamonadaceae.g__Acidovorax	k__Bacteria.p__Firmicutes.c__Bacilli.o__Bacillales.f__Paenibacillaceae.g__Aneurinibacillus
k__Bacteria.p__Actinobacteria.c__Actinobacteria.o__Micrococcales.f__Microbacteriaceae.g__Herbiconiux	k__Bacteria.p__Firmicutes.c__Bacilli.o__Bacillales.f__Paenibacillaceae.g__Brevibacillus
k__Bacteria.p__Proteobacteria.c__Gammaproteobacteria.o__Oceanospirillales.f__Oceanospirillaceae.g__Amphritea	k__Bacteria.p__Firmicutes.c__Bacilli.o__Bacillales.f__Paenibacillaceae.g__Cohnella
k__Bacteria.p__Proteobacteria.c__Gammaproteobacteria.o__Alteromonadales.f__Colwelliaceae.g__Colwellia	k__Bacteria.p__Firmicutes.c__Bacilli.o__Bacillales.f__Paenibacillaceae.g__Gorillibacterium
k__Bacteria.p__Proteobacteria.c__Betaproteobacteria.o__Burkholderiales.f__Burkholderiaceae.g__Ralstonia	k__Bacteria.p__Firmicutes.c__Bacilli.o__Bacillales.f__Paenibacillaceae.g__Paenibacillus
k__Bacteria.p__Proteobacteria.c__Betaproteobacteria.o__Burkholderiales.g__Leptothrix	k__Bacteria.p__Firmicutes.c__Bacilli.o__Bacillales.f__Paenibacillaceae.g__Thermobacillus
k__Bacteria.p__Proteobacteria.c__Gammaproteobacteria.o__Pseudomonadales.f__Pseudomonadaceae.g__Azotobacter	k__Bacteria.p__Firmicutes.c__Bacilli.o__Bacillales.f__Planococcaceae.g__Kurthia
k__Bacteria.p__Proteobacteria.c__Alphaproteobacteria.o__Sphingomonadales.f__Sphingomonadaceae.g__Sphingopyxis	k__Bacteria.p__Firmicutes.c__Bacilli.o__Bacillales.f__Planococcaceae.g__Paenisporosarcina
k__Bacteria.p__Proteobacteria.c__Gammaproteobacteria.o__Pasteurellales.f__Pasteurellaceae.g__Gallibacterium	k__Bacteria.p__Firmicutes.c__Bacilli.o__Bacillales.f__Planococcaceae.g__Planomicrobium
k__Bacteria.p__Proteobacteria.c__Alphaproteobacteria.o__Rhizobiales.f__Bradyrhizobiaceae.g__Bradyrhizobium	k__Bacteria.p__Firmicutes.c__Bacilli.o__Bacillales.f__Planococcaceae.g__Rummeliibacillus
k__Bacteria.p__Proteobacteria.c__Gammaproteobacteria.o__Enterobacteriales.f__Enterobacteriaceae.g__Wigglesworthia	k__Bacteria.p__Firmicutes.c__Bacilli.o__Bacillales.f__Planococcaceae.g__Solibacillus
k__Bacteria.p__Actinobacteria.c__Actinobacteria.o__Micrococcales.f__Microbacteriaceae.g__Rhodoluna	k__Bacteria.p__Firmicutes.c__Bacilli.o__Bacillales.f__Planococcaceae.g__Ureibacillus
k__Bacteria.p__Spirochaetes.c__Spirochaetia.o__Spirochaetales.f__Borreliaceae.g__Borrelia	k__Bacteria.p__Firmicutes.c__Bacilli.o__Bacillales.f__Sporolactobacillaceae.g__
k__Archaea.p__Euryarchaeota.c__Methanomicrobia.o__Methanomicrobiales.f__Methanomicrobiaceae.g__Methanofollis	k__Bacteria.p__Firmicutes.c__Bacilli.o__Bacillales.f__Sporolactobacillaceae.g__Caenibacillus
k__Bacteria.p__Proteobacteria.c__Alphaproteobacteria.o__Caulobacterales.f__Caulobacteraceae.g__Asticcacaulis	k__Bacteria.p__Firmicutes.c__Bacilli.o__Bacillales.f__Sporolactobacillaceae.g__Sporolactobacillus
k__Bacteria.p__Cyanobacteria.o__Nostocales.f__Scytonemataceae.g__Scytonema	k__Bacteria.p__Firmicutes.c__Bacilli.o__Bacillales.f__Sporolactobacillaceae.g__Tuberibacillus
k__Bacteria.p__Proteobacteria.c__Betaproteobacteria.o__Burkholderiales.f__Oxalobacteraceae.g__Massilia	k__Bacteria.p__Firmicutes.c__Bacilli.o__Bacillales.f__Staphylococcaceae.g__Nosocomiicoccus
k__Bacteria.p__Proteobacteria.c__Acidithiobacillia.o__Acidithiobacillales.f__Acidithiobacillaceae.g__Acidithiobacillus	k__Bacteria.p__Firmicutes.c__Bacilli.o__Bacillales.f__Staphylococcaceae.g__Staphylococcus
k__Bacteria.p__Proteobacteria.c__Betaproteobacteria.o__Burkholderiales.f__Comamonadaceae.g__Curvibacter	k__Bacteria.p__Firmicutes.c__Bacilli.o__Bacillales.f__Thermoactinomycetaceae.g__Risungbinella
k__Bacteria.p__Proteobacteria.c__Gammaproteobacteria.o__Pasteurellales.f__Pasteurellaceae.g__Haemophilus	k__Bacteria.p__Firmicutes.c__Bacilli.o__Bacillales.f__Thermoactinomycetaceae.g__Thermoactinomyces
k__Bacteria.p__Proteobacteria.c__Betaproteobacteria.o__Burkholderiales.f__Oxalobacteraceae.g__Duganella	k__Bacteria.p__Firmicutes.c__Bacilli.o__Lactobacillales.f__Aerococcaceae.g__Aerococcus
k__Bacteria.p__Proteobacteria.c__Betaproteobacteria.o__Burkholderiales.f__Comamonadaceae.g__Variovorax	k__Bacteria.p__Firmicutes.c__Bacilli.o__Lactobacillales.f__Aerococcaceae.g__Globicatella
k__Archaea.p__Euryarchaeota.c__Methanomicrobia.o__Methanosarcinales.f__Candidatus_Methanoperedenaceae.g__Candidatus_Methanoperedens	k__Bacteria.p__Firmicutes.c__Bacilli.o__Lactobacillales.f__Carnobacteriaceae.g__Alloiococcus
k__Archaea.p__Euryarchaeota.c__Methanomicrobia.o__Methanomicrobiales.f__Methanoregulaceae.g__Methanolinea	k__Bacteria.p__Firmicutes.c__Bacilli.o__Lactobacillales.f__Carnobacteriaceae.g__Atopobacter
k__Bacteria.p__Proteobacteria.c__Gammaproteobacteria.o__Enterobacteriales.f__Enterobacteriaceae.g__Candidatus_Regiella	k__Bacteria.p__Firmicutes.c__Bacilli.o__Lactobacillales.f__Carnobacteriaceae.g__Dolosigranulum
k__Bacteria.p__Actinobacteria.c__Actinobacteria.o__Micrococcales.f__Micrococcaceae.g__Kocuria	k__Bacteria.p__Firmicutes.c__Bacilli.o__Lactobacillales.f__Carnobacteriaceae.g__Granulicatella
k__Bacteria.p__Bacteroidetes.c__Flavobacteriia.o__Flavobacteriales.f__Flavobacteriaceae.g__Lutibacter	k__Bacteria.p__Firmicutes.c__Bacilli.o__Lactobacillales.f__Carnobacteriaceae.g__Jeotgalibaca
k__Bacteria.p__Proteobacteria.c__Alphaproteobacteria.o__Rhizobiales.f__Methylobacteriaceae.g__Methylobacterium	k__Bacteria.p__Firmicutes.c__Bacilli.o__Lactobacillales.f__Carnobacteriaceae.g__Trichococcus
k__Bacteria.p__Firmicutes.c__Clostridia.o__Thermoanaerobacterales.f__Thermoanaerobacteraceae.g__Thermoanaerobacter	k__Bacteria.p__Firmicutes.c__Bacilli.o__Lactobacillales.f__Enterococcaceae.g__Bavariicoccus
k__Bacteria.p__Cyanobacteria.o__Nostocales.f__Nostocaceae.g__Trichormus	k__Bacteria.p__Firmicutes.c__Bacilli.o__Lactobacillales.f__Enterococcaceae.g__Tetragenococcus
k__Bacteria.p__Proteobacteria.c__Betaproteobacteria.o__Burkholderiales.g__Aquincola	k__Bacteria.p__Firmicutes.c__Bacilli.o__Lactobacillales.f__Lactobacillaceae.g__Lactobacillus
k__Bacteria.p__Actinobacteria.c__Actinobacteria.o__Propionibacteriales.f__Propionibacteriaceae.g__Propionibacterium	k__Bacteria.p__Firmicutes.c__Bacilli.o__Lactobacillales.f__Lactobacillaceae.g__Pediococcus
k__Bacteria.p__Proteobacteria.c__Alphaproteobacteria.o__Rhizobiales.f__Methylobacteriaceae.g__Meganema	k__Bacteria.p__Firmicutes.c__Bacilli.o__Lactobacillales.f__Leuconostocaceae.g__Weissella
k__Bacteria.p__Bacteroidetes.c__Sphingobacteriia.o__Sphingobacteriales.f__Sphingobacteriaceae.g__Olivibacter	k__Bacteria.p__Firmicutes.c__Bacilli.o__Lactobacillales.f__Streptococcaceae.g__Anthococcus
k__Bacteria.p__Proteobacteria.c__Epsilonproteobacteria.o__Campylobacterales.f__Helicobacteraceae.g__Helicobacter	k__Bacteria.p__Firmicutes.c__Bacilli.o__Lactobacillales.f__Streptococcaceae.g__Streptococcus
k__Bacteria.p__Acidobacteria.c__Acidobacteriia.o__Acidobacteriales.f__Acidobacteriaceae.g__Terracidiphilus	k__Bacteria.p__Firmicutes.c__Clostridia.o__Clostridiales.f__.g__Epulopiscium
k__Bacteria.p__Rhodothermaeota.c__Balneolia.o__Balneolales.f__Balneolaceae.g__Gracilimonas	k__Bacteria.p__Firmicutes.c__Clostridia.o__Clostridiales.f__.g__Fenollaria
k__Bacteria.p__Proteobacteria.c__Alphaproteobacteria.o__Sphingomonadales.f__Sphingomonadaceae.g__Novosphingobium	k__Bacteria.p__Firmicutes.c__Clostridia.o__Clostridiales.f__.g__Flavonifractor
k__Bacteria.p__Actinobacteria.c__Actinobacteria.o__Corynebacteriales.f__Corynebacteriaceae.g__Corynebacterium	k__Bacteria.p__Firmicutes.c__Clostridia.o__Clostridiales.f__.g__Gottschalkia
k__Bacteria.p__Chlorobi.c__Chlorobia.o__Chlorobiales.f__Chlorobiaceae.g__Chlorobaculum	k__Bacteria.p__Firmicutes.c__Clostridia.o__Clostridiales.f__.g__Levyella
k__Bacteria.p__Synergistetes.c__Synergistia.o__Synergistales.f__Synergistaceae.g__Cloacibacillus	k__Bacteria.p__Firmicutes.c__Clostridia.o__Clostridiales.f__.g__Proteiniborus
k__Bacteria.p__Proteobacteria.c__Alphaproteobacteria.o__Rhodobacterales.f__Rhodobacteraceae.g__Octadecabacter	k__Bacteria.p__Firmicutes.c__Clostridia.o__Clostridiales.f__Catabacteriaceae.g__Catabacter
k__Bacteria.p__Proteobacteria.c__Betaproteobacteria.o__Burkholderiales.f__Alcaligenaceae.g__Bordetella	k__Bacteria.p__Firmicutes.c__Clostridia.o__Clostridiales.f__Clostridiaceae.g__
k__Bacteria.p__Firmicutes.c__Bacilli.o__Bacillales.f__Paenibacillaceae.g__Paenibacillus	k__Bacteria.p__Firmicutes.c__Clostridia.o__Clostridiales.f__Clostridiaceae.g__Anaerosalibacter
k__Bacteria.p__Firmicutes.c__Clostridia.o__Clostridiales.f__Lachnospiraceae.g__Oribacterium	k__Bacteria.p__Firmicutes.c__Clostridia.o__Clostridiales.f__Clostridiaceae.g__Caldisalinibacter
k__Bacteria.p__Chloroflexi.c__Dehalococcoidia.g__Dehalogenimonas	k__Bacteria.p__Firmicutes.c__Clostridia.o__Clostridiales.f__Clostridiaceae.g__Caloramator
k__Bacteria.p__Proteobacteria.c__Gammaproteobacteria.o__Pasteurellales.f__Pasteurellaceae.g__Histophilus	k__Bacteria.p__Firmicutes.c__Clostridia.o__Clostridiales.f__Clostridiaceae.g__Clostridium
k__Bacteria.p__Proteobacteria.c__Gammaproteobacteria.o__Methylococcales.f__Methylococcaceae.g__Methylosarcina	k__Bacteria.p__Firmicutes.c__Clostridia.o__Clostridiales.f__Clostridiaceae.g__Desnuesiella
k__Archaea.p__Thaumarchaeota.o__Nitrosopumilales.f__Nitrosopumilaceae.g__Nitrosopumilus	k__Bacteria.p__Firmicutes.c__Clostridia.o__Clostridiales.f__Clostridiaceae.g__Geosporobacter
k__Bacteria.p__Chloroflexi.c__Anaerolineae.o__Anaerolineales.f__Anaerolineaceae.g__Ornatilinea	k__Bacteria.p__Firmicutes.c__Clostridia.o__Clostridiales.f__Clostridiaceae.g__Hathewaya
k__Bacteria.p__Proteobacteria.c__Betaproteobacteria.o__Methylophilales.f__Methylophilaceae.g__Methylotenera	k__Bacteria.p__Firmicutes.c__Clostridia.o__Clostridiales.f__Clostridiaceae.g__Hungatella
k__Bacteria.p__Chloroflexi.c__Anaerolineae.o__Anaerolineales.f__Anaerolineaceae.g__Thermanaerothrix	k__Bacteria.p__Firmicutes.c__Clostridia.o__Clostridiales.f__Clostridiaceae.g__Lutispora
k__Bacteria.p__Actinobacteria.c__Actinobacteria.o__Bifidobacteriales.f__Bifidobacteriaceae.g__Alloscardovia	k__Bacteria.p__Firmicutes.c__Clostridia.o__Clostridiales.f__Clostridiaceae.g__Oxobacter
k__Bacteria.p__Proteobacteria.c__Betaproteobacteria.o__Burkholderiales.f__Oxalobacteraceae.g__Noviherbaspirillum	k__Bacteria.p__Firmicutes.c__Clostridia.o__Clostridiales.f__Clostridiales_Family_XII._Incertae_Sedis.g__Fusibacter
k__Bacteria.p__Actinobacteria.c__Actinobacteria.o__Corynebacteriales.f__Nocardiaceae.g__Nocardia	k__Bacteria.p__Firmicutes.c__Clostridia.o__Clostridiales.f__Clostridiales_Family_XIII._Incertae_Sedis.g__
k__Bacteria.p__Proteobacteria.c__Gammaproteobacteria.o__Alteromonadales.f__Alteromonadaceae.g__Gayadomonas	k__Bacteria.p__Firmicutes.c__Clostridia.o__Clostridiales.f__Clostridiales_Family_XIII._Incertae_Sedis.g__Emergencia
k__Bacteria.p__Actinobacteria.c__Actinobacteria.o__Micrococcales.f__Micrococcaceae.g__Pseudoglutamicibacter	k__Bacteria.p__Firmicutes.c__Clostridia.o__Clostridiales.f__Clostridiales_Family_XVII._Incertae_Sedis.g__Sulfobacillus
k__Bacteria.p__Proteobacteria.c__Gammaproteobacteria.o__Oceanospirillales.f__Hahellaceae.g__Hahella	k__Bacteria.p__Firmicutes.c__Clostridia.o__Clostridiales.f__Clostridiales_Family_XVII._Incertae_Sedis.g__Thermaerobacter
k__Bacteria.p__Firmicutes.c__Negativicutes.o__Selenomonadales.f__Sporomusaceae.g__Anaeroarcus	k__Bacteria.p__Firmicutes.c__Clostridia.o__Clostridiales.f__Eubacteriaceae.g__Acetobacterium
k__Bacteria.p__Bacteroidetes.c__Bacteroidia.o__Bacteroidales.f__Porphyromonadaceae.g__Sanguibacteroides	k__Bacteria.p__Firmicutes.c__Clostridia.o__Clostridiales.f__Eubacteriaceae.g__Anaerofustis
k__Bacteria.p__Firmicutes.c__Bacilli.o__Lactobacillales.f__Enterococcaceae.g__Vagococcus	k__Bacteria.p__Firmicutes.c__Clostridia.o__Clostridiales.f__Eubacteriaceae.g__Pseudoramibacter
k__Bacteria.p__Proteobacteria.c__Betaproteobacteria.o__Burkholderiales.f__Alcaligenaceae.g__Azohydromonas	k__Bacteria.p__Firmicutes.c__Clostridia.o__Clostridiales.f__Lachnospiraceae.g__Anaerocolumna
k__Bacteria.p__Firmicutes.c__Clostridia.o__Clostridiales.f__Ruminococcaceae.g__Candidatus_Soleaferrea	k__Bacteria.p__Firmicutes.c__Clostridia.o__Clostridiales.f__Lachnospiraceae.g__Anaerostipes
k__Bacteria.p__Actinobacteria.c__Actinobacteria.o__Micrococcales.f__Microbacteriaceae.g__Curtobacterium	k__Bacteria.p__Firmicutes.c__Clostridia.o__Clostridiales.f__Lachnospiraceae.g__Bariatricus
k__Bacteria.p__Bacteroidetes.c__Flavobacteriia.o__Flavobacteriales.f__Flavobacteriaceae.g__Gillisia	k__Bacteria.p__Firmicutes.c__Clostridia.o__Clostridiales.f__Lachnospiraceae.g__Blautia
k__Bacteria.p__Cyanobacteria.o__Oscillatoriales.g__Nodosilinea	k__Bacteria.p__Firmicutes.c__Clostridia.o__Clostridiales.f__Lachnospiraceae.g__Cellulosilyticum
k__Bacteria.p__Proteobacteria.c__Gammaproteobacteria.o__Legionellales.f__Coxiellaceae.g__Coxiella	k__Bacteria.p__Firmicutes.c__Clostridia.o__Clostridiales.f__Lachnospiraceae.g__Coprococcus
k__Bacteria.p__Thermotogae.c__Thermotogae.o__Petrotogales.g__Marinitoga	k__Bacteria.p__Firmicutes.c__Clostridia.o__Clostridiales.f__Lachnospiraceae.g__Eisenbergiella
k__Bacteria.p__Bacteroidetes.c__Flavobacteriia.o__Flavobacteriales.f__Flavobacteriaceae.g__Chryseobacterium	k__Bacteria.p__Firmicutes.c__Clostridia.o__Clostridiales.f__Lachnospiraceae.g__Fusicatenibacter
k__Bacteria.p__Proteobacteria.c__Betaproteobacteria.o__Burkholderiales.f__Oxalobacteraceae.g__Janthinobacterium	k__Bacteria.p__Firmicutes.c__Clostridia.o__Clostridiales.f__Lachnospiraceae.g__Johnsonella
k__Viruses.o__Caudovirales.f__Siphoviridae.g__Phicbklikevirus	k__Bacteria.p__Firmicutes.c__Clostridia.o__Clostridiales.f__Lachnospiraceae.g__Lachnoanaerobaculum
k__Viruses.o__Caudovirales.f__Siphoviridae.g__T5likevirus	k__Bacteria.p__Firmicutes.c__Clostridia.o__Clostridiales.f__Lachnospiraceae.g__Lachnoclostridium
k__Viruses.f__Astroviridae.g__Avastrovirus	k__Bacteria.p__Firmicutes.c__Clostridia.o__Clostridiales.f__Lachnospiraceae.g__Marvinbryantia
k__Viruses.f__Hepadnaviridae.g__Orthohepadnavirus	k__Bacteria.p__Firmicutes.c__Clostridia.o__Clostridiales.f__Lachnospiraceae.g__Robinsoniella
k__Viruses.o__Picornavirales.f__Picornaviridae.g__Sapelovirus	k__Bacteria.p__Firmicutes.c__Clostridia.o__Clostridiales.f__Lachnospiraceae.g__Roseburia
k__Viruses.f__Ascoviridae.g__Ascovirus	k__Bacteria.p__Firmicutes.c__Clostridia.o__Clostridiales.f__Lachnospiraceae.g__Sellimonas
k__Viruses.o__Picornavirales.f__Secoviridae.g__Fabavirus	k__Bacteria.p__Firmicutes.c__Clostridia.o__Clostridiales.f__Peptococcaceae.g__
k__Viruses.o__Herpesvirales.f__Alloherpesviridae.g__Batrachovirus	k__Bacteria.p__Firmicutes.c__Clostridia.o__Clostridiales.f__Peptococcaceae.g__Desulfitobacterium
k__Viruses.f__Poxviridae.g__Parapoxvirus	k__Bacteria.p__Firmicutes.c__Clostridia.o__Clostridiales.f__Peptococcaceae.g__Desulfurispora
k__Viruses.o__Caudovirales.f__Myoviridae.g__Spo1virus	k__Bacteria.p__Firmicutes.c__Clostridia.o__Clostridiales.f__Peptococcaceae.g__Thermincola
k__Viruses.o__Caudovirales.f__Siphoviridae.g__Yualikevirus	k__Bacteria.p__Firmicutes.c__Clostridia.o__Clostridiales.f__Peptostreptococcaceae.g__Acetoanaerobium
k__Viruses.f__Phycodnaviridae.g__Coccolithovirus	k__Bacteria.p__Firmicutes.c__Clostridia.o__Clostridiales.f__Peptostreptococcaceae.g__Asaccharospora
k__Viruses.o__Herpesvirales.f__Herpesviridae.g__Muromegalovirus	k__Bacteria.p__Firmicutes.c__Clostridia.o__Clostridiales.f__Peptostreptococcaceae.g__Clostridioides
k__Viruses.o__Herpesvirales.f__Herpesviridae.g__Iltovirus	k__Bacteria.p__Firmicutes.c__Clostridia.o__Clostridiales.f__Peptostreptococcaceae.g__Criibacterium
k__Viruses.f__Bunyaviridae.g__Phlebovirus	k__Bacteria.p__Firmicutes.c__Clostridia.o__Clostridiales.f__Peptostreptococcaceae.g__Intestinibacter
k__Viruses.o__Ligamenvirales.f__Rudiviridae.g__Rudivirus	k__Bacteria.p__Firmicutes.c__Clostridia.o__Clostridiales.f__Peptostreptococcaceae.g__Paeniclostridium
k__Viruses.o__Caudovirales.f__Myoviridae.g__Pbunalikevirus	k__Bacteria.p__Firmicutes.c__Clostridia.o__Clostridiales.f__Peptostreptococcaceae.g__Paraclostridium
k__Viruses.f__Iridoviridae.g__Ranavirus	k__Bacteria.p__Firmicutes.c__Clostridia.o__Clostridiales.f__Peptostreptococcaceae.g__Peptoclostridium
k__Viruses.o__Herpesvirales.f__Herpesviridae.g__Mardivirus	k__Bacteria.p__Firmicutes.c__Clostridia.o__Clostridiales.f__Peptostreptococcaceae.g__Peptostreptococcus
k__Viruses.o__Caudovirales.f__Myoviridae.g__Hapunalikevirus	k__Bacteria.p__Firmicutes.c__Clostridia.o__Clostridiales.f__Peptostreptococcaceae.g__Romboutsia
k__Viruses.o__Caudovirales.f__Myoviridae.g__I3likevirus	k__Bacteria.p__Firmicutes.c__Clostridia.o__Clostridiales.f__Ruminococcaceae.g__
k__Viruses.f__Papillomaviridae.g__Nupapillomavirus	k__Bacteria.p__Firmicutes.c__Clostridia.o__Clostridiales.f__Ruminococcaceae.g__Anaerotruncus
k__Viruses.o__Picornavirales.f__Picornaviridae.g__Enterovirus	k__Bacteria.p__Firmicutes.c__Clostridia.o__Clostridiales.f__Ruminococcaceae.g__Angelakisella
k__Viruses.f__Papillomaviridae.g__Gammapapillomavirus	k__Bacteria.p__Firmicutes.c__Clostridia.o__Clostridiales.f__Ruminococcaceae.g__Ethanoligenens
k__Viruses.o__Herpesvirales.f__Herpesviridae.g__Cytomegalovirus	k__Bacteria.p__Firmicutes.c__Clostridia.o__Clostridiales.f__Ruminococcaceae.g__Faecalibacterium
k__Viruses.f__Retroviridae.g__Betaretrovirus	k__Bacteria.p__Firmicutes.c__Clostridia.o__Clostridiales.f__Ruminococcaceae.g__Fournierella
k__Viruses.o__Caudovirales.f__Siphoviridae.g__Xp10likevirus	k__Bacteria.p__Firmicutes.c__Clostridia.o__Clostridiales.f__Ruminococcaceae.g__Mageeibacillus
k__Viruses.g__Tenuivirus	k__Bacteria.p__Firmicutes.c__Clostridia.o__Clostridiales.f__Ruminococcaceae.g__Ruminiclostridium
k__Viruses.f__Bunyaviridae.g__Orthobunyavirus	k__Bacteria.p__Firmicutes.c__Clostridia.o__Clostridiales.f__Ruminococcaceae.g__Ruminococcus
k__Viruses.f__Bunyaviridae.g__Hantavirus	k__Bacteria.p__Firmicutes.c__Clostridia.o__Clostridiales.f__Ruminococcaceae.g__Ruthenibacterium
k__Viruses.f__Reoviridae.g__Cypovirus	k__Bacteria.p__Firmicutes.c__Clostridia.o__Halanaerobiales.f__Halanaerobiaceae.g__Halothermothrix
k__Viruses.o__Caudovirales.f__Siphoviridae.g__Pgonelikevirus	k__Bacteria.p__Firmicutes.c__Clostridia.o__Natranaerobiales.f__Natranaerobiaceae.g__Natranaerobius
k__Viruses.f__Hypoviridae.g__Hypovirus	k__Bacteria.p__Firmicutes.c__Clostridia.o__Thermoanaerobacterales.f__Thermoanaerobacteraceae.g__Caldanaerobacter
k__Viruses.f__Poxviridae.g__Alphaentomopoxvirus	k__Bacteria.p__Firmicutes.c__Clostridia.o__Thermoanaerobacterales.f__Thermoanaerobacteraceae.g__Caldanaerobius
k__Viruses.o__Caudovirales.f__Podoviridae.g__F116likevirus	k__Bacteria.p__Firmicutes.c__Clostridia.o__Thermoanaerobacterales.f__Thermoanaerobacterales_Family_III._Incertae_Sedis.g__Caldicellulosiruptor
k__Viruses.f__Potyviridae.g__Potyvirus	k__Bacteria.p__Firmicutes.c__Clostridia.o__Thermoanaerobacterales.f__Thermoanaerobacterales_Family_III._Incertae_Sedis.g__Thermosediminibacter
k__Viruses.o__Caudovirales.f__Myoviridae.g__P100virus	k__Bacteria.p__Firmicutes.c__Clostridia.o__Thermoanaerobacterales.f__Thermodesulfobiaceae.g__Coprothermobacter
k__Viruses.f__Virgaviridae.g__Tobamovirus	k__Bacteria.p__Firmicutes.c__Erysipelotrichia.o__Erysipelotrichales.f__Erysipelotrichaceae.g__
k__Viruses.o__Caudovirales.f__Siphoviridae.g__N15likevirus	k__Bacteria.p__Firmicutes.c__Erysipelotrichia.o__Erysipelotrichales.f__Erysipelotrichaceae.g__Candidatus_Stoquefichus
k__Viruses.o__Caudovirales.f__Podoviridae.g__T7likevirus	k__Bacteria.p__Firmicutes.c__Erysipelotrichia.o__Erysipelotrichales.f__Erysipelotrichaceae.g__Catenibacterium
k__Viruses.f__Togaviridae.g__Alphavirus	k__Bacteria.p__Firmicutes.c__Erysipelotrichia.o__Erysipelotrichales.f__Erysipelotrichaceae.g__Dubosiella
k__Viruses.f__Flaviviridae.g__Hepacivirus	k__Bacteria.p__Firmicutes.c__Erysipelotrichia.o__Erysipelotrichales.f__Erysipelotrichaceae.g__Eggerthia
k__Viruses.o__Picornavirales.f__Iflaviridae.g__Iflavirus	k__Bacteria.p__Firmicutes.c__Erysipelotrichia.o__Erysipelotrichales.f__Erysipelotrichaceae.g__Holdemania
k__Viruses.o__Picornavirales.f__Secoviridae.g__Nepovirus	k__Bacteria.p__Firmicutes.c__Erysipelotrichia.o__Erysipelotrichales.f__Erysipelotrichaceae.g__Merdibacter
k__Viruses.o__Caudovirales.f__Siphoviridae.g__Bignuzlikevirus	k__Bacteria.p__Firmicutes.c__Negativicutes.o__Acidaminococcales.f__Acidaminococcaceae.g__Acidaminococcus
k__Viruses.o__Mononegavirales.f__Paramyxoviridae.g__Rubulavirus	k__Bacteria.p__Firmicutes.c__Negativicutes.o__Acidaminococcales.f__Acidaminococcaceae.g__Phascolarctobacterium
k__Viruses.f__Closteroviridae.g__Crinivirus	k__Bacteria.p__Firmicutes.c__Negativicutes.o__Selenomonadales.f__Selenomonadaceae.g__Megamonas
k__Viruses.f__Closteroviridae.g__Closterovirus	k__Bacteria.p__Firmicutes.c__Negativicutes.o__Selenomonadales.f__Selenomonadaceae.g__Mitsuokella
k__Viruses.f__Poxviridae.g__Molluscipoxvirus	k__Bacteria.p__Firmicutes.c__Negativicutes.o__Selenomonadales.f__Selenomonadaceae.g__Propionispira
k__Viruses.f__Mimiviridae.g__Cafeteriavirus	k__Bacteria.p__Firmicutes.c__Negativicutes.o__Selenomonadales.f__Selenomonadaceae.g__Schwartzia
k__Viruses.f__Caulimoviridae.g__Cavemovirus	k__Bacteria.p__Firmicutes.c__Negativicutes.o__Selenomonadales.f__Sporomusaceae.g__Anaeromusa
k__Viruses.o__Picornavirales.f__Picornaviridae.g__Aquamavirus	k__Bacteria.p__Firmicutes.c__Negativicutes.o__Selenomonadales.f__Sporomusaceae.g__Pelosinus
k__Viruses.f__Poxviridae.g__Capripoxvirus	k__Bacteria.p__Firmicutes.c__Negativicutes.o__Selenomonadales.f__Sporomusaceae.g__Thermosinus
k__Viruses.f__Virgaviridae.g__Hordeivirus	k__Bacteria.p__Firmicutes.c__Negativicutes.o__Veillonellales.f__Veillonellaceae.g__Anaeroglobus
k__Viruses.f__Partitiviridae.g__Betapartitivirus	k__Bacteria.p__Firmicutes.c__Negativicutes.o__Veillonellales.f__Veillonellaceae.g__Dialister
k__Viruses.f__Poxviridae.g__Crocodylidpoxvirus	k__Bacteria.p__Firmicutes.c__Negativicutes.o__Veillonellales.f__Veillonellaceae.g__Megasphaera
k__Viruses.o__Herpesvirales.f__Herpesviridae.g__Proboscivirus	k__Bacteria.p__Firmicutes.c__Negativicutes.o__Veillonellales.f__Veillonellaceae.g__Veillonella
k__Viruses.o__Caudovirales.f__Myoviridae.g__P2likevirus	k__Bacteria.p__Firmicutes.c__Tissierellia.o__.f__.g__
k__Viruses.o__Picornavirales.f__Picornaviridae.g__Dicipivirus	k__Bacteria.p__Firmicutes.c__Tissierellia.o__.f__.g__Dethiosulfatibacter
k__Viruses.g__Higrevirus	k__Bacteria.p__Firmicutes.c__Tissierellia.o__.f__.g__Ezakiella
k__Viruses.f__Poxviridae.g__Cervidpoxvirus	k__Bacteria.p__Firmicutes.c__Tissierellia.o__.f__.g__Kallipyga
k__Viruses.f__Virgaviridae.g__Furovirus	k__Bacteria.p__Firmicutes.c__Tissierellia.o__Tissierellales.f__.g__Sporanaerobacter
k__Viruses.f__Nimaviridae.g__Whispovirus	k__Bacteria.p__Firmicutes.c__Tissierellia.o__Tissierellales.f__Peptoniphilaceae.g__Anaerosphaera
k__Viruses.f__Papillomaviridae.g__Alphapapillomavirus	k__Bacteria.p__Firmicutes.c__Tissierellia.o__Tissierellales.f__Peptoniphilaceae.g__Finegoldia
k__Viruses.f__Mimiviridae.g__Mimivirus	k__Bacteria.p__Firmicutes.c__Tissierellia.o__Tissierellales.f__Peptoniphilaceae.g__Lagierella
k__Viruses.f__Phycodnaviridae.g__Phaeovirus	k__Bacteria.p__Firmicutes.c__Tissierellia.o__Tissierellales.f__Peptoniphilaceae.g__Parvimonas
k__Viruses.o__Caudovirales.f__Siphoviridae.g__Skunalikevirus	k__Bacteria.p__Firmicutes.c__Tissierellia.o__Tissierellales.f__Tissierellaceae.g__Tissierella
k__Viruses.f__Parvoviridae.g__Tetraparvovirus	k__Bacteria.p__Firmicutes.c__Tissierellia.o__Tissierellales.f__Tissierellaceae.g__Urmitella
k__Viruses.o__Caudovirales.f__Myoviridae.g__Kayvirus	k__Bacteria.p__Fusobacteria.c__Fusobacteriia.o__Fusobacteriales.f__Fusobacteriaceae.g__Cetobacterium
k__Viruses.o__Caudovirales.f__Podoviridae.g__Bcep22likevirus	k__Bacteria.p__Fusobacteria.c__Fusobacteriia.o__Fusobacteriales.f__Fusobacteriaceae.g__Fusobacterium
k__Viruses.o__Caudovirales.f__Siphoviridae.g__Tm4likevirus	k__Bacteria.p__Fusobacteria.c__Fusobacteriia.o__Fusobacteriales.f__Fusobacteriaceae.g__Psychrilyobacter
k__Viruses.f__Poxviridae.g__Yatapoxvirus	k__Bacteria.p__Fusobacteria.c__Fusobacteriia.o__Fusobacteriales.f__Leptotrichiaceae.g__Leptotrichia
k__Viruses.f__Anelloviridae.g__Alphatorquevirus	k__Bacteria.p__Fusobacteria.c__Fusobacteriia.o__Fusobacteriales.f__Leptotrichiaceae.g__Sneathia
k__Viruses.f__Sphaerolipoviridae.g__Gammasphaerolipovirus	k__Bacteria.p__Fusobacteria.c__Fusobacteriia.o__Fusobacteriales.f__Leptotrichiaceae.g__Streptobacillus
	k__Bacteria.p__Gemmatimonadetes.c__Gemmatimonadetes.o__Gemmatimonadales.f__Gemmatimonadaceae.g__Gemmatimonas
	k__Bacteria.p__Ignavibacteriae.c__Ignavibacteria.o__Ignavibacteriales.f__Ignavibacteriaceae.g__Ignavibacterium
	k__Bacteria.p__Lentisphaerae.c__Lentisphaeria.o__Lentisphaerales.f__Lentisphaeraceae.g__Lentisphaera
	k__Bacteria.p__Nitrospirae.c__Nitrospira.o__Nitrospirales.f__Nitrospiraceae.g__Nitrospira
	k__Bacteria.p__Planctomycetes.c__Phycisphaerae.o__.f__.g__
	k__Bacteria.p__Planctomycetes.c__Phycisphaerae.o__Phycisphaerales.f__Phycisphaeraceae.g__Phycisphaera
	k__Bacteria.p__Planctomycetes.c__Planctomycetia.o__Candidatus_Brocadiales.f__Candidatus_Brocadiaceae.g__Candidatus_Brocadia
	k__Bacteria.p__Planctomycetes.c__Planctomycetia.o__Planctomycetales.f__Gemmataceae.g__Gemmata
	k__Bacteria.p__Planctomycetes.c__Planctomycetia.o__Planctomycetales.f__Gemmataceae.g__Zavarzinella
	k__Bacteria.p__Planctomycetes.c__Planctomycetia.o__Planctomycetales.f__Planctomycetaceae.g__Blastopirellula
	k__Bacteria.p__Planctomycetes.c__Planctomycetia.o__Planctomycetales.f__Planctomycetaceae.g__Fuerstia
	k__Bacteria.p__Planctomycetes.c__Planctomycetia.o__Planctomycetales.f__Planctomycetaceae.g__Pirellula
	k__Bacteria.p__Planctomycetes.c__Planctomycetia.o__Planctomycetales.f__Planctomycetaceae.g__Planctopirus
	k__Bacteria.p__Planctomycetes.c__Planctomycetia.o__Planctomycetales.f__Planctomycetaceae.g__Roseimaritima
	k__Bacteria.p__Planctomycetes.c__Planctomycetia.o__Planctomycetales.f__Planctomycetaceae.g__Rubripirellula
	k__Bacteria.p__Proteobacteria.c__Acidithiobacillia.o__Acidithiobacillales.f__Thermithiobacillaceae.g__Thermithiobacillus
	k__Bacteria.p__Proteobacteria.c__Alphaproteobacteria.o__Caulobacterales.f__Caulobacteraceae.g__Asticcacaulis
	k__Bacteria.p__Proteobacteria.c__Alphaproteobacteria.o__Caulobacterales.f__Caulobacteraceae.g__Brevundimonas
	k__Bacteria.p__Proteobacteria.c__Alphaproteobacteria.o__Caulobacterales.f__Caulobacteraceae.g__Caulobacter
	k__Bacteria.p__Proteobacteria.c__Alphaproteobacteria.o__Caulobacterales.f__Caulobacteraceae.g__Phenylobacterium
	k__Bacteria.p__Proteobacteria.c__Alphaproteobacteria.o__Holosporales.f__.g__Caedibacter
	k__Bacteria.p__Proteobacteria.c__Alphaproteobacteria.o__Holosporales.f__Candidatus_Paracaedibacteraceae.g__Candidatus_Odyssella
	k__Bacteria.p__Proteobacteria.c__Alphaproteobacteria.o__Holosporales.f__Candidatus_Paracaedibacteraceae.g__Candidatus_Paracaedibacter
	k__Bacteria.p__Proteobacteria.c__Alphaproteobacteria.o__Holosporales.f__Holosporaceae.g__Holospora
	k__Bacteria.p__Proteobacteria.c__Alphaproteobacteria.o__Kordiimonadales.f__Kordiimonadaceae.g__Kordiimonas
	k__Bacteria.p__Proteobacteria.c__Alphaproteobacteria.o__Pelagibacterales.f__Pelagibacteraceae.g__
	k__Bacteria.p__Proteobacteria.c__Alphaproteobacteria.o__Pelagibacterales.f__Pelagibacteraceae.g__Candidatus_Pelagibacter
	k__Bacteria.p__Proteobacteria.c__Alphaproteobacteria.o__Rhizobiales.f__Aurantimonadaceae.g__Aurantimonas
	k__Bacteria.p__Proteobacteria.c__Alphaproteobacteria.o__Rhizobiales.f__Bartonellaceae.g__Bartonella
	k__Bacteria.p__Proteobacteria.c__Alphaproteobacteria.o__Rhizobiales.f__Beijerinckiaceae.g__Methyloferula
	k__Bacteria.p__Proteobacteria.c__Alphaproteobacteria.o__Rhizobiales.f__Bradyrhizobiaceae.g__Afipia
	k__Bacteria.p__Proteobacteria.c__Alphaproteobacteria.o__Rhizobiales.f__Bradyrhizobiaceae.g__Bosea
	k__Bacteria.p__Proteobacteria.c__Alphaproteobacteria.o__Rhizobiales.f__Bradyrhizobiaceae.g__Bradyrhizobium
	k__Bacteria.p__Proteobacteria.c__Alphaproteobacteria.o__Rhizobiales.f__Bradyrhizobiaceae.g__Rhodopseudomonas
	k__Bacteria.p__Proteobacteria.c__Alphaproteobacteria.o__Rhizobiales.f__Brucellaceae.g__Brucella
	k__Bacteria.p__Proteobacteria.c__Alphaproteobacteria.o__Rhizobiales.f__Brucellaceae.g__Ochrobactrum
	k__Bacteria.p__Proteobacteria.c__Alphaproteobacteria.o__Rhizobiales.f__Hyphomicrobiaceae.g__Blastochloris
	k__Bacteria.p__Proteobacteria.c__Alphaproteobacteria.o__Rhizobiales.f__Hyphomicrobiaceae.g__Devosia
	k__Bacteria.p__Proteobacteria.c__Alphaproteobacteria.o__Rhizobiales.f__Hyphomicrobiaceae.g__Filomicrobium
	k__Bacteria.p__Proteobacteria.c__Alphaproteobacteria.o__Rhizobiales.f__Hyphomicrobiaceae.g__Hyphomicrobium
	k__Bacteria.p__Proteobacteria.c__Alphaproteobacteria.o__Rhizobiales.f__Hyphomicrobiaceae.g__Maritalea
	k__Bacteria.p__Proteobacteria.c__Alphaproteobacteria.o__Rhizobiales.f__Hyphomicrobiaceae.g__Pelagibacterium
	k__Bacteria.p__Proteobacteria.c__Alphaproteobacteria.o__Rhizobiales.f__Methylobacteriaceae.g__Meganema
	k__Bacteria.p__Proteobacteria.c__Alphaproteobacteria.o__Rhizobiales.f__Methylobacteriaceae.g__Methylobacterium
	k__Bacteria.p__Proteobacteria.c__Alphaproteobacteria.o__Rhizobiales.f__Methylobacteriaceae.g__Microvirga
	k__Bacteria.p__Proteobacteria.c__Alphaproteobacteria.o__Rhizobiales.f__Methylocystaceae.g__Methylocystis
	k__Bacteria.p__Proteobacteria.c__Alphaproteobacteria.o__Rhizobiales.f__Methylocystaceae.g__Methylopila
	k__Bacteria.p__Proteobacteria.c__Alphaproteobacteria.o__Rhizobiales.f__Phyllobacteriaceae.g__Aminobacter
	k__Bacteria.p__Proteobacteria.c__Alphaproteobacteria.o__Rhizobiales.f__Phyllobacteriaceae.g__Aquamicrobium
	k__Bacteria.p__Proteobacteria.c__Alphaproteobacteria.o__Rhizobiales.f__Phyllobacteriaceae.g__Chelativorans
	k__Bacteria.p__Proteobacteria.c__Alphaproteobacteria.o__Rhizobiales.f__Phyllobacteriaceae.g__Mesorhizobium
	k__Bacteria.p__Proteobacteria.c__Alphaproteobacteria.o__Rhizobiales.f__Rhizobiaceae.g__Candidatus_Liberibacter
	k__Bacteria.p__Proteobacteria.c__Alphaproteobacteria.o__Rhizobiales.f__Rhizobiaceae.g__Kaistia
	k__Bacteria.p__Proteobacteria.c__Alphaproteobacteria.o__Rhizobiales.f__Rhizobiaceae.g__Rhizobium
	k__Bacteria.p__Proteobacteria.c__Alphaproteobacteria.o__Rhizobiales.f__Rhizobiaceae.g__Sinorhizobium
	k__Bacteria.p__Proteobacteria.c__Alphaproteobacteria.o__Rhizobiales.f__Rhodobiaceae.g__Parvibaculum
	k__Bacteria.p__Proteobacteria.c__Alphaproteobacteria.o__Rhizobiales.f__Xanthobacteraceae.g__
	k__Bacteria.p__Proteobacteria.c__Alphaproteobacteria.o__Rhizobiales.f__Xanthobacteraceae.g__Labrys
	k__Bacteria.p__Proteobacteria.c__Alphaproteobacteria.o__Rhizobiales.f__Xanthobacteraceae.g__Pseudolabrys
	k__Bacteria.p__Proteobacteria.c__Alphaproteobacteria.o__Rhizobiales.f__Xanthobacteraceae.g__Xanthobacter
	k__Bacteria.p__Proteobacteria.c__Alphaproteobacteria.o__Rhodobacterales.f__Hyphomonadaceae.g__Hellea
	k__Bacteria.p__Proteobacteria.c__Alphaproteobacteria.o__Rhodobacterales.f__Hyphomonadaceae.g__Oceanicaulis
	k__Bacteria.p__Proteobacteria.c__Alphaproteobacteria.o__Rhodobacterales.f__Rhodobacteraceae.g__Actibacterium
	k__Bacteria.p__Proteobacteria.c__Alphaproteobacteria.o__Rhodobacterales.f__Rhodobacteraceae.g__Acuticoccus
	k__Bacteria.p__Proteobacteria.c__Alphaproteobacteria.o__Rhodobacterales.f__Rhodobacteraceae.g__Ahrensia
	k__Bacteria.p__Proteobacteria.c__Alphaproteobacteria.o__Rhodobacterales.f__Rhodobacteraceae.g__Defluviimonas
	k__Bacteria.p__Proteobacteria.c__Alphaproteobacteria.o__Rhodobacterales.f__Rhodobacteraceae.g__Dinoroseobacter
	k__Bacteria.p__Proteobacteria.c__Alphaproteobacteria.o__Rhodobacterales.f__Rhodobacteraceae.g__Ketogulonicigenium
	k__Bacteria.p__Proteobacteria.c__Alphaproteobacteria.o__Rhodobacterales.f__Rhodobacteraceae.g__Leisingera
	k__Bacteria.p__Proteobacteria.c__Alphaproteobacteria.o__Rhodobacterales.f__Rhodobacteraceae.g__Litoreibacter
	k__Bacteria.p__Proteobacteria.c__Alphaproteobacteria.o__Rhodobacterales.f__Rhodobacteraceae.g__Marinovum
	k__Bacteria.p__Proteobacteria.c__Alphaproteobacteria.o__Rhodobacterales.f__Rhodobacteraceae.g__Natronohydrobacter
	k__Bacteria.p__Proteobacteria.c__Alphaproteobacteria.o__Rhodobacterales.f__Rhodobacteraceae.g__Nereida
	k__Bacteria.p__Proteobacteria.c__Alphaproteobacteria.o__Rhodobacterales.f__Rhodobacteraceae.g__Nesiotobacter
	k__Bacteria.p__Proteobacteria.c__Alphaproteobacteria.o__Rhodobacterales.f__Rhodobacteraceae.g__Oceanicola
	k__Bacteria.p__Proteobacteria.c__Alphaproteobacteria.o__Rhodobacterales.f__Rhodobacteraceae.g__Paenirhodobacter
	k__Bacteria.p__Proteobacteria.c__Alphaproteobacteria.o__Rhodobacterales.f__Rhodobacteraceae.g__Paracoccus
	k__Bacteria.p__Proteobacteria.c__Alphaproteobacteria.o__Rhodobacterales.f__Rhodobacteraceae.g__Phaeobacter
	k__Bacteria.p__Proteobacteria.c__Alphaproteobacteria.o__Rhodobacterales.f__Rhodobacteraceae.g__Pleomorphobacterium
	k__Bacteria.p__Proteobacteria.c__Alphaproteobacteria.o__Rhodobacterales.f__Rhodobacteraceae.g__Pseudodonghicola
	k__Bacteria.p__Proteobacteria.c__Alphaproteobacteria.o__Rhodobacterales.f__Rhodobacteraceae.g__Pseudopelagicola
	k__Bacteria.p__Proteobacteria.c__Alphaproteobacteria.o__Rhodobacterales.f__Rhodobacteraceae.g__Rhodovulum
	k__Bacteria.p__Proteobacteria.c__Alphaproteobacteria.o__Rhodobacterales.f__Rhodobacteraceae.g__Roseibium
	k__Bacteria.p__Proteobacteria.c__Alphaproteobacteria.o__Rhodobacterales.f__Rhodobacteraceae.g__Roseobacter
	k__Bacteria.p__Proteobacteria.c__Alphaproteobacteria.o__Rhodobacterales.f__Rhodobacteraceae.g__Roseovarius
	k__Bacteria.p__Proteobacteria.c__Alphaproteobacteria.o__Rhodobacterales.f__Rhodobacteraceae.g__Sedimentitalea
	k__Bacteria.p__Proteobacteria.c__Alphaproteobacteria.o__Rhodobacterales.f__Rhodobacteraceae.g__Sediminimonas
	k__Bacteria.p__Proteobacteria.c__Alphaproteobacteria.o__Rhodobacterales.f__Rhodobacteraceae.g__Stappia
	k__Bacteria.p__Proteobacteria.c__Alphaproteobacteria.o__Rhodobacterales.f__Rhodobacteraceae.g__Tateyamaria
	k__Bacteria.p__Proteobacteria.c__Alphaproteobacteria.o__Rhodobacterales.f__Rhodobacteraceae.g__Thiobacimonas
	k__Bacteria.p__Proteobacteria.c__Alphaproteobacteria.o__Rhodobacterales.f__Rhodobacteraceae.g__Yangia
	k__Bacteria.p__Proteobacteria.c__Alphaproteobacteria.o__Rhodospirillales.f__.g__Elioraea
	k__Bacteria.p__Proteobacteria.c__Alphaproteobacteria.o__Rhodospirillales.f__Acetobacteraceae.g__Acetobacter
	k__Bacteria.p__Proteobacteria.c__Alphaproteobacteria.o__Rhodospirillales.f__Acetobacteraceae.g__Acidisphaera
	k__Bacteria.p__Proteobacteria.c__Alphaproteobacteria.o__Rhodospirillales.f__Acetobacteraceae.g__Acidocella
	k__Bacteria.p__Proteobacteria.c__Alphaproteobacteria.o__Rhodospirillales.f__Acetobacteraceae.g__Acidomonas
	k__Bacteria.p__Proteobacteria.c__Alphaproteobacteria.o__Rhodospirillales.f__Acetobacteraceae.g__Asaia
	k__Bacteria.p__Proteobacteria.c__Alphaproteobacteria.o__Rhodospirillales.f__Acetobacteraceae.g__Belnapia
	k__Bacteria.p__Proteobacteria.c__Alphaproteobacteria.o__Rhodospirillales.f__Acetobacteraceae.g__Gluconacetobacter
	k__Bacteria.p__Proteobacteria.c__Alphaproteobacteria.o__Rhodospirillales.f__Acetobacteraceae.g__Granulibacter
	k__Bacteria.p__Proteobacteria.c__Alphaproteobacteria.o__Rhodospirillales.f__Acetobacteraceae.g__Neoasaia
	k__Bacteria.p__Proteobacteria.c__Alphaproteobacteria.o__Rhodospirillales.f__Acetobacteraceae.g__Roseomonas
	k__Bacteria.p__Proteobacteria.c__Alphaproteobacteria.o__Rhodospirillales.f__Acetobacteraceae.g__Rubritepida
	k__Bacteria.p__Proteobacteria.c__Alphaproteobacteria.o__Rhodospirillales.f__Rhodospirillaceae.g__Azospirillum
	k__Bacteria.p__Proteobacteria.c__Alphaproteobacteria.o__Rhodospirillales.f__Rhodospirillaceae.g__Caenispirillum
	k__Bacteria.p__Proteobacteria.c__Alphaproteobacteria.o__Rhodospirillales.f__Rhodospirillaceae.g__Dongia
	k__Bacteria.p__Proteobacteria.c__Alphaproteobacteria.o__Rhodospirillales.f__Rhodospirillaceae.g__Elstera
	k__Bacteria.p__Proteobacteria.c__Alphaproteobacteria.o__Rhodospirillales.f__Rhodospirillaceae.g__Fodinicurvata
	k__Bacteria.p__Proteobacteria.c__Alphaproteobacteria.o__Rhodospirillales.f__Rhodospirillaceae.g__Insolitispirillum
	k__Bacteria.p__Proteobacteria.c__Alphaproteobacteria.o__Rhodospirillales.f__Rhodospirillaceae.g__Niveispirillum
	k__Bacteria.p__Proteobacteria.c__Alphaproteobacteria.o__Rhodospirillales.f__Rhodospirillaceae.g__Novispirillum
	k__Bacteria.p__Proteobacteria.c__Alphaproteobacteria.o__Rhodospirillales.f__Rhodospirillaceae.g__Phaeospirillum
	k__Bacteria.p__Proteobacteria.c__Alphaproteobacteria.o__Rhodospirillales.f__Rhodospirillaceae.g__Rhodocista
	k__Bacteria.p__Proteobacteria.c__Alphaproteobacteria.o__Rhodospirillales.f__Rhodospirillaceae.g__Thalassospira
	k__Bacteria.p__Proteobacteria.c__Alphaproteobacteria.o__Rhodospirillales.f__Rhodospirillaceae.g__Tistrella
	k__Bacteria.p__Proteobacteria.c__Alphaproteobacteria.o__Rickettsiales.f__.g__Candidatus_Hepatobacter
	k__Bacteria.p__Proteobacteria.c__Alphaproteobacteria.o__Rickettsiales.f__Rickettsiaceae.g__Occidentia
	k__Bacteria.p__Proteobacteria.c__Alphaproteobacteria.o__Sphingomonadales.f__Erythrobacteraceae.g__Altererythrobacter
	k__Bacteria.p__Proteobacteria.c__Alphaproteobacteria.o__Sphingomonadales.f__Sphingomonadaceae.g__Blastomonas
	k__Bacteria.p__Proteobacteria.c__Alphaproteobacteria.o__Sphingomonadales.f__Sphingomonadaceae.g__Novosphingobium
	k__Bacteria.p__Proteobacteria.c__Alphaproteobacteria.o__Sphingomonadales.f__Sphingomonadaceae.g__Pacificimonas
	k__Bacteria.p__Proteobacteria.c__Alphaproteobacteria.o__Sphingomonadales.f__Sphingomonadaceae.g__Sandarakinorhabdus
	k__Bacteria.p__Proteobacteria.c__Alphaproteobacteria.o__Sphingomonadales.f__Sphingomonadaceae.g__Sphingobium
	k__Bacteria.p__Proteobacteria.c__Alphaproteobacteria.o__Sphingomonadales.f__Sphingomonadaceae.g__Sphingomonas
	k__Bacteria.p__Proteobacteria.c__Alphaproteobacteria.o__Sphingomonadales.f__Sphingomonadaceae.g__Sphingopyxis
	k__Bacteria.p__Proteobacteria.c__Alphaproteobacteria.o__Sphingomonadales.f__Sphingomonadaceae.g__Sphingorhabdus
	k__Bacteria.p__Proteobacteria.c__Betaproteobacteria.o__.f__.g__Candidatus_Accumulibacter
	k__Bacteria.p__Proteobacteria.c__Betaproteobacteria.o__.f__.g__Kinetoplastibacterium
	k__Bacteria.p__Proteobacteria.c__Betaproteobacteria.o__Burkholderiales.f__.g__
	k__Bacteria.p__Proteobacteria.c__Betaproteobacteria.o__Burkholderiales.f__.g__Aquabacterium
	k__Bacteria.p__Proteobacteria.c__Betaproteobacteria.o__Burkholderiales.f__.g__Aquincola
	k__Bacteria.p__Proteobacteria.c__Betaproteobacteria.o__Burkholderiales.f__.g__Ideonella
	k__Bacteria.p__Proteobacteria.c__Betaproteobacteria.o__Burkholderiales.f__.g__Leptothrix
	k__Bacteria.p__Proteobacteria.c__Betaproteobacteria.o__Burkholderiales.f__.g__Methylibium
	k__Bacteria.p__Proteobacteria.c__Betaproteobacteria.o__Burkholderiales.f__.g__Paucibacter
	k__Bacteria.p__Proteobacteria.c__Betaproteobacteria.o__Burkholderiales.f__.g__Sphaerotilus
	k__Bacteria.p__Proteobacteria.c__Betaproteobacteria.o__Burkholderiales.f__.g__Tepidimonas
	k__Bacteria.p__Proteobacteria.c__Betaproteobacteria.o__Burkholderiales.f__.g__Thiomonas
	k__Bacteria.p__Proteobacteria.c__Betaproteobacteria.o__Burkholderiales.f__Alcaligenaceae.g__Achromobacter
	k__Bacteria.p__Proteobacteria.c__Betaproteobacteria.o__Burkholderiales.f__Alcaligenaceae.g__Advenella
	k__Bacteria.p__Proteobacteria.c__Betaproteobacteria.o__Burkholderiales.f__Alcaligenaceae.g__Alcaligenes
	k__Bacteria.p__Proteobacteria.c__Betaproteobacteria.o__Burkholderiales.f__Alcaligenaceae.g__Azohydromonas
	k__Bacteria.p__Proteobacteria.c__Betaproteobacteria.o__Burkholderiales.f__Alcaligenaceae.g__Bordetella
	k__Bacteria.p__Proteobacteria.c__Betaproteobacteria.o__Burkholderiales.f__Alcaligenaceae.g__Castellaniella
	k__Bacteria.p__Proteobacteria.c__Betaproteobacteria.o__Burkholderiales.f__Alcaligenaceae.g__Kerstersia
	k__Bacteria.p__Proteobacteria.c__Betaproteobacteria.o__Burkholderiales.f__Alcaligenaceae.g__Oligella
	k__Bacteria.p__Proteobacteria.c__Betaproteobacteria.o__Burkholderiales.f__Alcaligenaceae.g__Pelistega
	k__Bacteria.p__Proteobacteria.c__Betaproteobacteria.o__Burkholderiales.f__Burkholderiaceae.g__Burkholderia
	k__Bacteria.p__Proteobacteria.c__Betaproteobacteria.o__Burkholderiales.f__Burkholderiaceae.g__Candidatus_Glomeribacter
	k__Bacteria.p__Proteobacteria.c__Betaproteobacteria.o__Burkholderiales.f__Burkholderiaceae.g__Chitinimonas
	k__Bacteria.p__Proteobacteria.c__Betaproteobacteria.o__Burkholderiales.f__Burkholderiaceae.g__Cupriavidus
	k__Bacteria.p__Proteobacteria.c__Betaproteobacteria.o__Burkholderiales.f__Burkholderiaceae.g__Lautropia
	k__Bacteria.p__Proteobacteria.c__Betaproteobacteria.o__Burkholderiales.f__Burkholderiaceae.g__Paraburkholderia
	k__Bacteria.p__Proteobacteria.c__Betaproteobacteria.o__Burkholderiales.f__Burkholderiaceae.g__Polynucleobacter
	k__Bacteria.p__Proteobacteria.c__Betaproteobacteria.o__Burkholderiales.f__Burkholderiaceae.g__Ralstonia
	k__Bacteria.p__Proteobacteria.c__Betaproteobacteria.o__Burkholderiales.f__Comamonadaceae.g__
	k__Bacteria.p__Proteobacteria.c__Betaproteobacteria.o__Burkholderiales.f__Comamonadaceae.g__Acidovorax
	k__Bacteria.p__Proteobacteria.c__Betaproteobacteria.o__Burkholderiales.f__Comamonadaceae.g__Alicycliphilus
	k__Bacteria.p__Proteobacteria.c__Betaproteobacteria.o__Burkholderiales.f__Comamonadaceae.g__Caenimonas
	k__Bacteria.p__Proteobacteria.c__Betaproteobacteria.o__Burkholderiales.f__Comamonadaceae.g__Caldimonas
	k__Bacteria.p__Proteobacteria.c__Betaproteobacteria.o__Burkholderiales.f__Comamonadaceae.g__Candidatus_Symbiobacter
	k__Bacteria.p__Proteobacteria.c__Betaproteobacteria.o__Burkholderiales.f__Comamonadaceae.g__Comamonas
	k__Bacteria.p__Proteobacteria.c__Betaproteobacteria.o__Burkholderiales.f__Comamonadaceae.g__Curvibacter
	k__Bacteria.p__Proteobacteria.c__Betaproteobacteria.o__Burkholderiales.f__Comamonadaceae.g__Delftia
	k__Bacteria.p__Proteobacteria.c__Betaproteobacteria.o__Burkholderiales.f__Comamonadaceae.g__Lampropedia
	k__Bacteria.p__Proteobacteria.c__Betaproteobacteria.o__Burkholderiales.f__Comamonadaceae.g__Limnohabitans
	k__Bacteria.p__Proteobacteria.c__Betaproteobacteria.o__Burkholderiales.f__Comamonadaceae.g__Melaminivora
	k__Bacteria.p__Proteobacteria.c__Betaproteobacteria.o__Burkholderiales.f__Comamonadaceae.g__Ottowia
	k__Bacteria.p__Proteobacteria.c__Betaproteobacteria.o__Burkholderiales.f__Comamonadaceae.g__Pelomonas
	k__Bacteria.p__Proteobacteria.c__Betaproteobacteria.o__Burkholderiales.f__Comamonadaceae.g__Pseudacidovorax
	k__Bacteria.p__Proteobacteria.c__Betaproteobacteria.o__Burkholderiales.f__Comamonadaceae.g__Rhodoferax
	k__Bacteria.p__Proteobacteria.c__Betaproteobacteria.o__Burkholderiales.f__Comamonadaceae.g__Xenophilus
	k__Bacteria.p__Proteobacteria.c__Betaproteobacteria.o__Burkholderiales.f__Oxalobacteraceae.g__Collimonas
	k__Bacteria.p__Proteobacteria.c__Betaproteobacteria.o__Burkholderiales.f__Oxalobacteraceae.g__Duganella
	k__Bacteria.p__Proteobacteria.c__Betaproteobacteria.o__Burkholderiales.f__Oxalobacteraceae.g__Herbaspirillum
	k__Bacteria.p__Proteobacteria.c__Betaproteobacteria.o__Burkholderiales.f__Oxalobacteraceae.g__Herminiimonas
	k__Bacteria.p__Proteobacteria.c__Betaproteobacteria.o__Burkholderiales.f__Oxalobacteraceae.g__Janthinobacterium
	k__Bacteria.p__Proteobacteria.c__Betaproteobacteria.o__Burkholderiales.f__Oxalobacteraceae.g__Massilia
	k__Bacteria.p__Proteobacteria.c__Betaproteobacteria.o__Burkholderiales.f__Oxalobacteraceae.g__Noviherbaspirillum
	k__Bacteria.p__Proteobacteria.c__Betaproteobacteria.o__Burkholderiales.f__Oxalobacteraceae.g__Pseudoduganella
	k__Bacteria.p__Proteobacteria.c__Betaproteobacteria.o__Burkholderiales.f__Sutterellaceae.g__Sutterella
	k__Bacteria.p__Proteobacteria.c__Betaproteobacteria.o__Ferrovales.f__Ferrovaceae.g__Ferrovum
	k__Bacteria.p__Proteobacteria.c__Betaproteobacteria.o__Gallionellales.f__Gallionellaceae.g__Gallionella
	k__Bacteria.p__Proteobacteria.c__Betaproteobacteria.o__Gallionellales.f__Gallionellaceae.g__Sideroxydans
	k__Bacteria.p__Proteobacteria.c__Betaproteobacteria.o__Hydrogenophilales.f__Hydrogenophilaceae.g__Tepidiphilus
	k__Bacteria.p__Proteobacteria.c__Betaproteobacteria.o__Hydrogenophilales.f__Hydrogenophilaceae.g__Thiobacillus
	k__Bacteria.p__Proteobacteria.c__Betaproteobacteria.o__Methylophilales.f__Methylophilaceae.g__Candidatus_Methylopumilus
	k__Bacteria.p__Proteobacteria.c__Betaproteobacteria.o__Methylophilales.f__Methylophilaceae.g__Methylobacillus
	k__Bacteria.p__Proteobacteria.c__Betaproteobacteria.o__Methylophilales.f__Methylophilaceae.g__Methylophilus
	k__Bacteria.p__Proteobacteria.c__Betaproteobacteria.o__Methylophilales.f__Methylophilaceae.g__Methylovorus
	k__Bacteria.p__Proteobacteria.c__Betaproteobacteria.o__Neisseriales.f__Chromobacteriaceae.g__Andreprevotia
	k__Bacteria.p__Proteobacteria.c__Betaproteobacteria.o__Neisseriales.f__Chromobacteriaceae.g__Aquaspirillum
	k__Bacteria.p__Proteobacteria.c__Betaproteobacteria.o__Neisseriales.f__Chromobacteriaceae.g__Aquitalea
	k__Bacteria.p__Proteobacteria.c__Betaproteobacteria.o__Neisseriales.f__Chromobacteriaceae.g__Chitinilyticum
	k__Bacteria.p__Proteobacteria.c__Betaproteobacteria.o__Neisseriales.f__Chromobacteriaceae.g__Chitiniphilus
	k__Bacteria.p__Proteobacteria.c__Betaproteobacteria.o__Neisseriales.f__Chromobacteriaceae.g__Gulbenkiania
	k__Bacteria.p__Proteobacteria.c__Betaproteobacteria.o__Neisseriales.f__Chromobacteriaceae.g__Leeia
	k__Bacteria.p__Proteobacteria.c__Betaproteobacteria.o__Neisseriales.f__Chromobacteriaceae.g__Microvirgula
	k__Bacteria.p__Proteobacteria.c__Betaproteobacteria.o__Neisseriales.f__Chromobacteriaceae.g__Silvimonas
	k__Bacteria.p__Proteobacteria.c__Betaproteobacteria.o__Neisseriales.f__Neisseriaceae.g__Alysiella
	k__Bacteria.p__Proteobacteria.c__Betaproteobacteria.o__Neisseriales.f__Neisseriaceae.g__Conchiformibius
	k__Bacteria.p__Proteobacteria.c__Betaproteobacteria.o__Neisseriales.f__Neisseriaceae.g__Crenobacter
	k__Bacteria.p__Proteobacteria.c__Betaproteobacteria.o__Neisseriales.f__Neisseriaceae.g__Eikenella
	k__Bacteria.p__Proteobacteria.c__Betaproteobacteria.o__Neisseriales.f__Neisseriaceae.g__Kingella
	k__Bacteria.p__Proteobacteria.c__Betaproteobacteria.o__Neisseriales.f__Neisseriaceae.g__Morococcus
	k__Bacteria.p__Proteobacteria.c__Betaproteobacteria.o__Neisseriales.f__Neisseriaceae.g__Neisseria
	k__Bacteria.p__Proteobacteria.c__Betaproteobacteria.o__Rhodocyclales.f__Rhodocyclaceae.g__
	k__Bacteria.p__Proteobacteria.c__Betaproteobacteria.o__Rhodocyclales.f__Rhodocyclaceae.g__Aromatoleum
	k__Bacteria.p__Proteobacteria.c__Betaproteobacteria.o__Rhodocyclales.f__Rhodocyclaceae.g__Azoarcus
	k__Bacteria.p__Proteobacteria.c__Betaproteobacteria.o__Rhodocyclales.f__Rhodocyclaceae.g__Azospira
	k__Bacteria.p__Proteobacteria.c__Betaproteobacteria.o__Rhodocyclales.f__Rhodocyclaceae.g__Dechloromonas
	k__Bacteria.p__Proteobacteria.c__Betaproteobacteria.o__Rhodocyclales.f__Rhodocyclaceae.g__Thauera
	k__Bacteria.p__Proteobacteria.c__Betaproteobacteria.o__Rhodocyclales.f__Rhodocyclaceae.g__Uliginosibacterium
	k__Bacteria.p__Proteobacteria.c__Deltaproteobacteria.o__.f__.g__
	k__Bacteria.p__Proteobacteria.c__Deltaproteobacteria.o__.f__Candidatus_Desulfofervidaceae.g__Candidatus_Desulfofervidus
	k__Bacteria.p__Proteobacteria.c__Deltaproteobacteria.o__Bdellovibrionales.f__Halobacteriovoraceae.g__Halobacteriovorax
	k__Bacteria.p__Proteobacteria.c__Deltaproteobacteria.o__Desulfobacterales.f__Desulfobacteraceae.g__Desulfococcus
	k__Bacteria.p__Proteobacteria.c__Deltaproteobacteria.o__Desulfobacterales.f__Desulfobacteraceae.g__Desulfosarcina
	k__Bacteria.p__Proteobacteria.c__Deltaproteobacteria.o__Desulfobacterales.f__Desulfobacteraceae.g__Desulfospira
	k__Bacteria.p__Proteobacteria.c__Deltaproteobacteria.o__Desulfobacterales.f__Desulfobulbaceae.g__Desulfotalea
	k__Bacteria.p__Proteobacteria.c__Deltaproteobacteria.o__Desulfovibrionales.f__Desulfohalobiaceae.g__Desulfonatronospira
	k__Bacteria.p__Proteobacteria.c__Deltaproteobacteria.o__Desulfovibrionales.f__Desulfohalobiaceae.g__Desulfovermiculus
	k__Bacteria.p__Proteobacteria.c__Deltaproteobacteria.o__Desulfovibrionales.f__Desulfovibrionaceae.g__Bilophila
	k__Bacteria.p__Proteobacteria.c__Deltaproteobacteria.o__Desulfovibrionales.f__Desulfovibrionaceae.g__Desulfocurvus
	k__Bacteria.p__Proteobacteria.c__Deltaproteobacteria.o__Desulfuromonadales.f__Desulfuromonadaceae.g__Pelobacter
	k__Bacteria.p__Proteobacteria.c__Deltaproteobacteria.o__Desulfuromonadales.f__Geobacteraceae.g__Geobacter
	k__Bacteria.p__Proteobacteria.c__Deltaproteobacteria.o__Myxococcales.f__Anaeromyxobacteraceae.g__Anaeromyxobacter
	k__Bacteria.p__Proteobacteria.c__Deltaproteobacteria.o__Myxococcales.f__Archangiaceae.g__Archangium
	k__Bacteria.p__Proteobacteria.c__Deltaproteobacteria.o__Myxococcales.f__Archangiaceae.g__Cystobacter
	k__Bacteria.p__Proteobacteria.c__Deltaproteobacteria.o__Myxococcales.f__Archangiaceae.g__Hyalangium
	k__Bacteria.p__Proteobacteria.c__Deltaproteobacteria.o__Myxococcales.f__Archangiaceae.g__Stigmatella
	k__Bacteria.p__Proteobacteria.c__Deltaproteobacteria.o__Myxococcales.f__Nannocystaceae.g__Plesiocystis
	k__Bacteria.p__Proteobacteria.c__Deltaproteobacteria.o__Myxococcales.f__Sandaracinaceae.g__Sandaracinus
	k__Bacteria.p__Proteobacteria.c__Deltaproteobacteria.o__Myxococcales.f__Vulgatibacteraceae.g__Vulgatibacter
	k__Bacteria.p__Proteobacteria.c__Deltaproteobacteria.o__Syntrophobacterales.f__Syntrophobacteraceae.g__Syntrophobacter
	k__Bacteria.p__Proteobacteria.c__Epsilonproteobacteria.o__.f__.g__Sulfurovum
	k__Bacteria.p__Proteobacteria.c__Epsilonproteobacteria.o__Campylobacterales.f__.g__Nitratifractor
	k__Bacteria.p__Proteobacteria.c__Epsilonproteobacteria.o__Campylobacterales.f__Campylobacteraceae.g__Arcobacter
	k__Bacteria.p__Proteobacteria.c__Epsilonproteobacteria.o__Campylobacterales.f__Campylobacteraceae.g__Sulfurospirillum
	k__Bacteria.p__Proteobacteria.c__Epsilonproteobacteria.o__Campylobacterales.f__Helicobacteraceae.g__Sulfuricurvum
	k__Bacteria.p__Proteobacteria.c__Epsilonproteobacteria.o__Campylobacterales.f__Helicobacteraceae.g__Sulfurimonas
	k__Bacteria.p__Proteobacteria.c__Epsilonproteobacteria.o__Campylobacterales.f__Helicobacteraceae.g__Wolinella
	k__Bacteria.p__Proteobacteria.c__Epsilonproteobacteria.o__Nautiliales.f__Nautiliaceae.g__Lebetimonas
	k__Bacteria.p__Proteobacteria.c__Epsilonproteobacteria.o__Nautiliales.f__Nautiliaceae.g__Nautilia
	k__Bacteria.p__Proteobacteria.c__Gammaproteobacteria.o__.f__.g__
	k__Bacteria.p__Proteobacteria.c__Gammaproteobacteria.o__.f__.g__Candidatus_Thiodiazotropha
	k__Bacteria.p__Proteobacteria.c__Gammaproteobacteria.o__.f__.g__Gallaecimonas
	k__Bacteria.p__Proteobacteria.c__Gammaproteobacteria.o__.f__.g__Pseudohongiella
	k__Bacteria.p__Proteobacteria.c__Gammaproteobacteria.o__.f__.g__Sedimenticola
	k__Bacteria.p__Proteobacteria.c__Gammaproteobacteria.o__.f__.g__Wohlfahrtiimonas
	k__Bacteria.p__Proteobacteria.c__Gammaproteobacteria.o__.f__Competibacteraceae.g__Candidatus_Contendobacter
	k__Bacteria.p__Proteobacteria.c__Gammaproteobacteria.o__Aeromonadales.f__Aeromonadaceae.g__Aeromonas
	k__Bacteria.p__Proteobacteria.c__Gammaproteobacteria.o__Aeromonadales.f__Aeromonadaceae.g__Oceanimonas
	k__Bacteria.p__Proteobacteria.c__Gammaproteobacteria.o__Aeromonadales.f__Aeromonadaceae.g__Tolumonas
	k__Bacteria.p__Proteobacteria.c__Gammaproteobacteria.o__Aeromonadales.f__Succinivibrionaceae.g__Anaerobiospirillum
	k__Bacteria.p__Proteobacteria.c__Gammaproteobacteria.o__Aeromonadales.f__Succinivibrionaceae.g__Ruminobacter
	k__Bacteria.p__Proteobacteria.c__Gammaproteobacteria.o__Alteromonadales.f__.g__
	k__Bacteria.p__Proteobacteria.c__Gammaproteobacteria.o__Alteromonadales.f__Alteromonadaceae.g__
	k__Bacteria.p__Proteobacteria.c__Gammaproteobacteria.o__Alteromonadales.f__Alteromonadaceae.g__Agarivorans
	k__Bacteria.p__Proteobacteria.c__Gammaproteobacteria.o__Alteromonadales.f__Alteromonadaceae.g__Aliagarivorans
	k__Bacteria.p__Proteobacteria.c__Gammaproteobacteria.o__Alteromonadales.f__Alteromonadaceae.g__Alishewanella
	k__Bacteria.p__Proteobacteria.c__Gammaproteobacteria.o__Alteromonadales.f__Alteromonadaceae.g__Alteromonas
	k__Bacteria.p__Proteobacteria.c__Gammaproteobacteria.o__Alteromonadales.f__Alteromonadaceae.g__Catenovulum
	k__Bacteria.p__Proteobacteria.c__Gammaproteobacteria.o__Alteromonadales.f__Alteromonadaceae.g__Gayadomonas
	k__Bacteria.p__Proteobacteria.c__Gammaproteobacteria.o__Alteromonadales.f__Alteromonadaceae.g__Glaciecola
	k__Bacteria.p__Proteobacteria.c__Gammaproteobacteria.o__Alteromonadales.f__Alteromonadaceae.g__Marinobacter
	k__Bacteria.p__Proteobacteria.c__Gammaproteobacteria.o__Alteromonadales.f__Alteromonadaceae.g__Paraglaciecola
	k__Bacteria.p__Proteobacteria.c__Gammaproteobacteria.o__Alteromonadales.f__Colwelliaceae.g__Thalassotalea
	k__Bacteria.p__Proteobacteria.c__Gammaproteobacteria.o__Alteromonadales.f__Moritellaceae.g__Moritella
	k__Bacteria.p__Proteobacteria.c__Gammaproteobacteria.o__Alteromonadales.f__Pseudoalteromonadaceae.g__Algicola
	k__Bacteria.p__Proteobacteria.c__Gammaproteobacteria.o__Alteromonadales.f__Pseudoalteromonadaceae.g__Pseudoalteromonas
	k__Bacteria.p__Proteobacteria.c__Gammaproteobacteria.o__Alteromonadales.f__Psychromonadaceae.g__Psychromonas
	k__Bacteria.p__Proteobacteria.c__Gammaproteobacteria.o__Alteromonadales.f__Shewanellaceae.g__Shewanella
	k__Bacteria.p__Proteobacteria.c__Gammaproteobacteria.o__Cardiobacteriales.f__Cardiobacteriaceae.g__Cardiobacterium
	k__Bacteria.p__Proteobacteria.c__Gammaproteobacteria.o__Cellvibrionales.f__Cellvibrionaceae.g__Gilvimarinus
	k__Bacteria.p__Proteobacteria.c__Gammaproteobacteria.o__Cellvibrionales.f__Cellvibrionaceae.g__Simiduia
	k__Bacteria.p__Proteobacteria.c__Gammaproteobacteria.o__Cellvibrionales.f__Halieaceae.g__Haliea
	k__Bacteria.p__Proteobacteria.c__Gammaproteobacteria.o__Cellvibrionales.f__Halieaceae.g__Halioglobus
	k__Bacteria.p__Proteobacteria.c__Gammaproteobacteria.o__Cellvibrionales.f__Microbulbiferaceae.g__Microbulbifer
	k__Bacteria.p__Proteobacteria.c__Gammaproteobacteria.o__Cellvibrionales.f__Spongiibacteraceae.g__
	k__Bacteria.p__Proteobacteria.c__Gammaproteobacteria.o__Cellvibrionales.f__Spongiibacteraceae.g__Dasania
	k__Bacteria.p__Proteobacteria.c__Gammaproteobacteria.o__Chromatiales.f__Chromatiaceae.g__Arsukibacterium
	k__Bacteria.p__Proteobacteria.c__Gammaproteobacteria.o__Chromatiales.f__Chromatiaceae.g__Marichromatium
	k__Bacteria.p__Proteobacteria.c__Gammaproteobacteria.o__Chromatiales.f__Chromatiaceae.g__Thiocapsa
	k__Bacteria.p__Proteobacteria.c__Gammaproteobacteria.o__Chromatiales.f__Ectothiorhodospiraceae.g__Halofilum
	k__Bacteria.p__Proteobacteria.c__Gammaproteobacteria.o__Chromatiales.f__Ectothiorhodospiraceae.g__Spiribacter
	k__Bacteria.p__Proteobacteria.c__Gammaproteobacteria.o__Chromatiales.f__Ectothiorhodospiraceae.g__Thiorhodospira
	k__Bacteria.p__Proteobacteria.c__Gammaproteobacteria.o__Chromatiales.f__Halothiobacillaceae.g__Halothiobacillus
	k__Bacteria.p__Proteobacteria.c__Gammaproteobacteria.o__Chromatiales.f__Wenzhouxiangellaceae.g__Wenzhouxiangella
	k__Bacteria.p__Proteobacteria.c__Gammaproteobacteria.o__Enterobacterales.f__.g__Plesiomonas
	k__Bacteria.p__Proteobacteria.c__Gammaproteobacteria.o__Enterobacterales.f__Budviciaceae.g__Leminorella
	k__Bacteria.p__Proteobacteria.c__Gammaproteobacteria.o__Enterobacterales.f__Enterobacteriaceae.g__
	k__Bacteria.p__Proteobacteria.c__Gammaproteobacteria.o__Enterobacterales.f__Enterobacteriaceae.g__Candidatus_Blochmannia
	k__Bacteria.p__Proteobacteria.c__Gammaproteobacteria.o__Enterobacterales.f__Enterobacteriaceae.g__Candidatus_Tachikawaea
	k__Bacteria.p__Proteobacteria.c__Gammaproteobacteria.o__Enterobacterales.f__Enterobacteriaceae.g__Cedecea
	k__Bacteria.p__Proteobacteria.c__Gammaproteobacteria.o__Enterobacterales.f__Enterobacteriaceae.g__Citrobacter
	k__Bacteria.p__Proteobacteria.c__Gammaproteobacteria.o__Enterobacterales.f__Enterobacteriaceae.g__Enterobacter
	k__Bacteria.p__Proteobacteria.c__Gammaproteobacteria.o__Enterobacterales.f__Enterobacteriaceae.g__Klebsiella
	k__Bacteria.p__Proteobacteria.c__Gammaproteobacteria.o__Enterobacterales.f__Enterobacteriaceae.g__Kluyvera
	k__Bacteria.p__Proteobacteria.c__Gammaproteobacteria.o__Enterobacterales.f__Enterobacteriaceae.g__Kosakonia
	k__Bacteria.p__Proteobacteria.c__Gammaproteobacteria.o__Enterobacterales.f__Enterobacteriaceae.g__Lelliottia
	k__Bacteria.p__Proteobacteria.c__Gammaproteobacteria.o__Enterobacterales.f__Enterobacteriaceae.g__Pluralibacter
	k__Bacteria.p__Proteobacteria.c__Gammaproteobacteria.o__Enterobacterales.f__Erwiniaceae.g__Buchnera
	k__Bacteria.p__Proteobacteria.c__Gammaproteobacteria.o__Enterobacterales.f__Erwiniaceae.g__Pantoea
	k__Bacteria.p__Proteobacteria.c__Gammaproteobacteria.o__Enterobacterales.f__Erwiniaceae.g__Tatumella
	k__Bacteria.p__Proteobacteria.c__Gammaproteobacteria.o__Enterobacterales.f__Hafniaceae.g__Edwardsiella
	k__Bacteria.p__Proteobacteria.c__Gammaproteobacteria.o__Enterobacterales.f__Hafniaceae.g__Hafnia
	k__Bacteria.p__Proteobacteria.c__Gammaproteobacteria.o__Enterobacterales.f__Hafniaceae.g__Obesumbacterium
	k__Bacteria.p__Proteobacteria.c__Gammaproteobacteria.o__Enterobacterales.f__Morganellaceae.g__Arsenophonus
	k__Bacteria.p__Proteobacteria.c__Gammaproteobacteria.o__Enterobacterales.f__Morganellaceae.g__Photorhabdus
	k__Bacteria.p__Proteobacteria.c__Gammaproteobacteria.o__Enterobacterales.f__Morganellaceae.g__Providencia
	k__Bacteria.p__Proteobacteria.c__Gammaproteobacteria.o__Enterobacterales.f__Morganellaceae.g__Xenorhabdus
	k__Bacteria.p__Proteobacteria.c__Gammaproteobacteria.o__Enterobacterales.f__Pectobacteriaceae.g__Brenneria
	k__Bacteria.p__Proteobacteria.c__Gammaproteobacteria.o__Enterobacterales.f__Pectobacteriaceae.g__Sodalis
	k__Bacteria.p__Proteobacteria.c__Gammaproteobacteria.o__Enterobacterales.f__Yersiniaceae.g__Chania
	k__Bacteria.p__Proteobacteria.c__Gammaproteobacteria.o__Enterobacterales.f__Yersiniaceae.g__Rahnella
	k__Bacteria.p__Proteobacteria.c__Gammaproteobacteria.o__Enterobacterales.f__Yersiniaceae.g__Rouxiella
	k__Bacteria.p__Proteobacteria.c__Gammaproteobacteria.o__Enterobacterales.f__Yersiniaceae.g__Serratia
	k__Bacteria.p__Proteobacteria.c__Gammaproteobacteria.o__Legionellales.f__Coxiellaceae.g__Coxiella
	k__Bacteria.p__Proteobacteria.c__Gammaproteobacteria.o__Legionellales.f__Coxiellaceae.g__Rickettsiella
	k__Bacteria.p__Proteobacteria.c__Gammaproteobacteria.o__Legionellales.f__Legionellaceae.g__Fluoribacter
	k__Bacteria.p__Proteobacteria.c__Gammaproteobacteria.o__Legionellales.f__Legionellaceae.g__Legionella
	k__Bacteria.p__Proteobacteria.c__Gammaproteobacteria.o__Legionellales.f__Legionellaceae.g__Tatlockia
	k__Bacteria.p__Proteobacteria.c__Gammaproteobacteria.o__Methylococcales.f__Methylococcaceae.g__Methylobacter
	k__Bacteria.p__Proteobacteria.c__Gammaproteobacteria.o__Methylococcales.f__Methylococcaceae.g__Methylocaldum
	k__Bacteria.p__Proteobacteria.c__Gammaproteobacteria.o__Methylococcales.f__Methylococcaceae.g__Methylococcus
	k__Bacteria.p__Proteobacteria.c__Gammaproteobacteria.o__Methylococcales.f__Methylococcaceae.g__Methyloglobulus
	k__Bacteria.p__Proteobacteria.c__Gammaproteobacteria.o__Methylococcales.f__Methylococcaceae.g__Methylomonas
	k__Bacteria.p__Proteobacteria.c__Gammaproteobacteria.o__Methylococcales.f__Methylothermaceae.g__Methylohalobius
	k__Bacteria.p__Proteobacteria.c__Gammaproteobacteria.o__Nevskiales.f__Sinobacteraceae.g__Steroidobacter
	k__Bacteria.p__Proteobacteria.c__Gammaproteobacteria.o__Oceanospirillales.f__.g__Terasakiispira
	k__Bacteria.p__Proteobacteria.c__Gammaproteobacteria.o__Oceanospirillales.f__Alcanivoracaceae.g__Alcanivorax
	k__Bacteria.p__Proteobacteria.c__Gammaproteobacteria.o__Oceanospirillales.f__Hahellaceae.g__Endozoicomonas
	k__Bacteria.p__Proteobacteria.c__Gammaproteobacteria.o__Oceanospirillales.f__Hahellaceae.g__Hahella
	k__Bacteria.p__Proteobacteria.c__Gammaproteobacteria.o__Oceanospirillales.f__Halomonadaceae.g__Carnimonas
	k__Bacteria.p__Proteobacteria.c__Gammaproteobacteria.o__Oceanospirillales.f__Halomonadaceae.g__Chromohalobacter
	k__Bacteria.p__Proteobacteria.c__Gammaproteobacteria.o__Oceanospirillales.f__Halomonadaceae.g__Cobetia
	k__Bacteria.p__Proteobacteria.c__Gammaproteobacteria.o__Oceanospirillales.f__Halomonadaceae.g__Halotalea
	k__Bacteria.p__Proteobacteria.c__Gammaproteobacteria.o__Oceanospirillales.f__Oceanospirillaceae.g__Amphritea
	k__Bacteria.p__Proteobacteria.c__Gammaproteobacteria.o__Oceanospirillales.f__Oceanospirillaceae.g__Marinobacterium
	k__Bacteria.p__Proteobacteria.c__Gammaproteobacteria.o__Oceanospirillales.f__Oceanospirillaceae.g__Marinomonas
	k__Bacteria.p__Proteobacteria.c__Gammaproteobacteria.o__Oceanospirillales.f__Oceanospirillaceae.g__Marinospirillum
	k__Bacteria.p__Proteobacteria.c__Gammaproteobacteria.o__Oceanospirillales.f__Oceanospirillaceae.g__Motiliproteus
	k__Bacteria.p__Proteobacteria.c__Gammaproteobacteria.o__Oceanospirillales.f__Oceanospirillaceae.g__Neptuniibacter
	k__Bacteria.p__Proteobacteria.c__Gammaproteobacteria.o__Oceanospirillales.f__Oceanospirillaceae.g__Nitrincola
	k__Bacteria.p__Proteobacteria.c__Gammaproteobacteria.o__Oceanospirillales.f__Saccharospirillaceae.g__Gynuella
	k__Bacteria.p__Proteobacteria.c__Gammaproteobacteria.o__Oceanospirillales.f__Saccharospirillaceae.g__Saccharospirillum
	k__Bacteria.p__Proteobacteria.c__Gammaproteobacteria.o__Pasteurellales.f__Pasteurellaceae.g__Basfia
	k__Bacteria.p__Proteobacteria.c__Gammaproteobacteria.o__Pasteurellales.f__Pasteurellaceae.g__Gallibacterium
	k__Bacteria.p__Proteobacteria.c__Gammaproteobacteria.o__Pasteurellales.f__Pasteurellaceae.g__Haemophilus
	k__Bacteria.p__Proteobacteria.c__Gammaproteobacteria.o__Pasteurellales.f__Pasteurellaceae.g__Muribacter
	k__Bacteria.p__Proteobacteria.c__Gammaproteobacteria.o__Pasteurellales.f__Pasteurellaceae.g__Necropsobacter
	k__Bacteria.p__Proteobacteria.c__Gammaproteobacteria.o__Pasteurellales.f__Pasteurellaceae.g__Pasteurella
	k__Bacteria.p__Proteobacteria.c__Gammaproteobacteria.o__Pseudomonadales.f__Moraxellaceae.g__Acinetobacter
	k__Bacteria.p__Proteobacteria.c__Gammaproteobacteria.o__Pseudomonadales.f__Moraxellaceae.g__Alkanindiges
	k__Bacteria.p__Proteobacteria.c__Gammaproteobacteria.o__Pseudomonadales.f__Moraxellaceae.g__Moraxella
	k__Bacteria.p__Proteobacteria.c__Gammaproteobacteria.o__Pseudomonadales.f__Pseudomonadaceae.g__Azotobacter
	k__Bacteria.p__Proteobacteria.c__Gammaproteobacteria.o__Pseudomonadales.f__Pseudomonadaceae.g__Pseudomonas
	k__Bacteria.p__Proteobacteria.c__Gammaproteobacteria.o__Thiotrichales.f__.g__Fangia
	k__Bacteria.p__Proteobacteria.c__Gammaproteobacteria.o__Thiotrichales.f__Francisellaceae.g__
	k__Bacteria.p__Proteobacteria.c__Gammaproteobacteria.o__Thiotrichales.f__Thiotrichaceae.g__Beggiatoa
	k__Bacteria.p__Proteobacteria.c__Gammaproteobacteria.o__Thiotrichales.f__Thiotrichaceae.g__Leucothrix
	k__Bacteria.p__Proteobacteria.c__Gammaproteobacteria.o__Thiotrichales.f__Thiotrichaceae.g__Thioploca
	k__Bacteria.p__Proteobacteria.c__Gammaproteobacteria.o__Thiotrichales.f__Thiotrichaceae.g__Thiothrix
	k__Bacteria.p__Proteobacteria.c__Gammaproteobacteria.o__Vibrionales.f__Vibrionaceae.g__Photobacterium
	k__Bacteria.p__Proteobacteria.c__Gammaproteobacteria.o__Vibrionales.f__Vibrionaceae.g__Vibrio
	k__Bacteria.p__Proteobacteria.c__Gammaproteobacteria.o__Xanthomonadales.f__Rhodanobacteraceae.g__
	k__Bacteria.p__Proteobacteria.c__Gammaproteobacteria.o__Xanthomonadales.f__Rhodanobacteraceae.g__Frateuria
	k__Bacteria.p__Proteobacteria.c__Gammaproteobacteria.o__Xanthomonadales.f__Rhodanobacteraceae.g__Luteibacter
	k__Bacteria.p__Proteobacteria.c__Gammaproteobacteria.o__Xanthomonadales.f__Rhodanobacteraceae.g__Mizugakiibacter
	k__Bacteria.p__Proteobacteria.c__Gammaproteobacteria.o__Xanthomonadales.f__Rhodanobacteraceae.g__Rhodanobacter
	k__Bacteria.p__Proteobacteria.c__Gammaproteobacteria.o__Xanthomonadales.f__Xanthomonadaceae.g__Luteimonas
	k__Bacteria.p__Proteobacteria.c__Gammaproteobacteria.o__Xanthomonadales.f__Xanthomonadaceae.g__Lysobacter
	k__Bacteria.p__Proteobacteria.c__Gammaproteobacteria.o__Xanthomonadales.f__Xanthomonadaceae.g__Silanimonas
	k__Bacteria.p__Proteobacteria.c__Gammaproteobacteria.o__Xanthomonadales.f__Xanthomonadaceae.g__Stenotrophomonas
	k__Bacteria.p__Proteobacteria.c__Gammaproteobacteria.o__Xanthomonadales.f__Xanthomonadaceae.g__Thermomonas
	k__Bacteria.p__Proteobacteria.c__Gammaproteobacteria.o__Xanthomonadales.f__Xanthomonadaceae.g__Xanthomonas
	k__Bacteria.p__Proteobacteria.c__Gammaproteobacteria.o__Xanthomonadales.f__Xanthomonadaceae.g__Xylella
	k__Bacteria.p__Proteobacteria.c__Zetaproteobacteria.o__.f__.g__
	k__Bacteria.p__Spirochaetes.c__Spirochaetia.o__.f__Leptospiraceae.g__Leptonema
	k__Bacteria.p__Spirochaetes.c__Spirochaetia.o__.f__Leptospiraceae.g__Turneriella
	k__Bacteria.p__Spirochaetes.c__Spirochaetia.o__Brachyspirales.f__Brachyspiraceae.g__Brachyspira
	k__Bacteria.p__Spirochaetes.c__Spirochaetia.o__Spirochaetales.f__Borreliaceae.g__Borrelia
	k__Bacteria.p__Spirochaetes.c__Spirochaetia.o__Spirochaetales.f__Borreliaceae.g__Borreliella
	k__Bacteria.p__Spirochaetes.c__Spirochaetia.o__Spirochaetales.f__Spirochaetaceae.g__Sphaerochaeta
	k__Bacteria.p__Spirochaetes.c__Spirochaetia.o__Spirochaetales.f__Spirochaetaceae.g__Spirochaeta
	k__Bacteria.p__Synergistetes.c__Synergistia.o__Synergistales.f__Synergistaceae.g__Acetomicrobium
	k__Bacteria.p__Synergistetes.c__Synergistia.o__Synergistales.f__Synergistaceae.g__Aminiphilus
	k__Bacteria.p__Synergistetes.c__Synergistia.o__Synergistales.f__Synergistaceae.g__Cloacibacillus
	k__Bacteria.p__Synergistetes.c__Synergistia.o__Synergistales.f__Synergistaceae.g__Pyramidobacter
	k__Bacteria.p__Synergistetes.c__Synergistia.o__Synergistales.f__Synergistaceae.g__Thermovirga
	k__Bacteria.p__Tenericutes.c__Mollicutes.o__Acholeplasmatales.f__Acholeplasmataceae.g__Candidatus_Phytoplasma
	k__Bacteria.p__Thermodesulfobacteria.c__Thermodesulfobacteria.o__Thermodesulfobacteriales.f__Thermodesulfobacteriaceae.g__Caldimicrobium
	k__Bacteria.p__Thermodesulfobacteria.c__Thermodesulfobacteria.o__Thermodesulfobacteriales.f__Thermodesulfobacteriaceae.g__Thermodesulfobacterium
	k__Bacteria.p__Thermodesulfobacteria.c__Thermodesulfobacteria.o__Thermodesulfobacteriales.f__Thermodesulfobacteriaceae.g__Thermosulfurimonas
	k__Bacteria.p__Thermotogae.c__Thermotogae.o__Kosmotogales.f__Kosmotogaceae.g__Kosmotoga
	k__Bacteria.p__Thermotogae.c__Thermotogae.o__Petrotogales.f__.g__Defluviitoga
	k__Bacteria.p__Thermotogae.c__Thermotogae.o__Petrotogales.f__.g__Marinitoga
	k__Bacteria.p__Thermotogae.c__Thermotogae.o__Thermotogales.f__Fervidobacteriaceae.g__Fervidobacterium
	k__Bacteria.p__Thermotogae.c__Thermotogae.o__Thermotogales.f__Fervidobacteriaceae.g__Thermosipho
	k__Bacteria.p__Thermotogae.c__Thermotogae.o__Thermotogales.f__Thermotogaceae.g__Pseudothermotoga
	k__Bacteria.p__Thermotogae.c__Thermotogae.o__Thermotogales.f__Thermotogaceae.g__Thermotoga
	k__Bacteria.p__Verrucomicrobia.c__.o__.f__.g__
	k__Bacteria.p__Verrucomicrobia.c__Methylacidiphilae.o__Methylacidiphilales.f__Methylacidiphilaceae.g__Methylacidiphilum
	k__Bacteria.p__Verrucomicrobia.c__Opitutae.o__Opitutales.f__Opitutaceae.g__Diplosphaera
	k__Bacteria.p__Verrucomicrobia.c__Opitutae.o__Opitutales.f__Opitutaceae.g__Lacunisphaera
	k__Bacteria.p__Verrucomicrobia.c__Opitutae.o__Opitutales.f__Opitutaceae.g__Opitutus
	k__Bacteria.p__Verrucomicrobia.c__Opitutae.o__Puniceicoccales.f__Puniceicoccaceae.g__Coraliomargarita
	k__Bacteria.p__Verrucomicrobia.c__Spartobacteria.o__.f__.g__Terrimicrobium
	k__Bacteria.p__Verrucomicrobia.c__Spartobacteria.o__Chthoniobacterales.f__Chthoniobacteraceae.g__Chthoniobacter
	k__Bacteria.p__Verrucomicrobia.c__Verrucomicrobiae.o__Verrucomicrobiales.f__Verrucomicrobiaceae.g__Verrucomicrobium

## Sheet: EDF 8g
	obs_age_year	pred_age_year	dataset
1	46	45.3861	Kraken
2	30	47.4458	Kraken
3	59	45.5151	Kraken
4	62	38.0977	Kraken
5	47	50.9467	Kraken
6	31	44.6059	Kraken
7	59	40.9815	Kraken
8	62	40.2331	Kraken
9	62	45.4692	Kraken
10	36	44.8503	Kraken
11	42	46.7454	Kraken
12	66	45.9809	Kraken
13	55	40.4607	Kraken
14	32	46.8929	Kraken
15	31	41.3539	Kraken
16	53	39.4621	Kraken
17	40	43.8924	Kraken
18	36	54.8191	Kraken
19	29	44.4419	Kraken
20	30	49.5557	Kraken
21	54	40.4252	Kraken
22	46	48.7343	Kraken
23	43	44.2745	Kraken
24	54	45.6164	Kraken
25	31	41.7112	Kraken
26	26	44.7303	Kraken
27	49	46.0479	Kraken
28	63	41.1827	Kraken
29	57	53.0022	Kraken
30	25	39.5647	Kraken
31	46	44.4342	Kraken
32	46	42.8587	Kraken
33	59	41.3153	Kraken
34	46	45.3432	Kraken
35	47	42.7421	Kraken
36	58	43.2766	Kraken
37	20	47.544	Kraken
38	49	44.6652	Kraken
39	34	46.4223	Kraken
40	40	37.6816	Kraken
41	60	46.974	Kraken
42	38	45.8785	Kraken
43	46	45.2056	Kraken
44	68	44.4624	Kraken
45	34	43.3554	Kraken
46	66	46.2944	Kraken
47	63	38.7961	Kraken
48	49	51.904	Kraken
49	61	46.6523	Kraken
50	26	42.9325	Kraken
51	36	46.5371	Kraken
52	52	41.4664	Kraken
53	51	47.2266	Kraken
54	50	53.2026	Kraken
55	49	41.4259	Kraken
56	50	38.375	Kraken
57	44	55.4131	Kraken
58	21	49.1054	Kraken
59	48	51.5139	Kraken
60	24	48.5949	Kraken
61	41	49.894	Kraken
62	25	48.5399	Kraken
63	25	57.4681	Kraken
64	42	46.0136	Kraken
65	26	44.339	Kraken
66	55	42.3217	Kraken
67	47	46.5054	Kraken
68	58	43.3882	Kraken
69	50	48.3674	Kraken
70	46	44.1995	Shogun
71	30	45.9373	Shogun
72	59	46.8827	Shogun
73	62	42.8783	Shogun
74	47	55.3727	Shogun
75	31	43.9503	Shogun
76	59	47.8746	Shogun
77	62	36.5097	Shogun
78	62	46.3411	Shogun
79	36	42.7596	Shogun
80	42	48.8294	Shogun
81	66	44.6748	Shogun
82	55	53.8001	Shogun
83	32	39.9452	Shogun
84	31	45.6149	Shogun
85	53	44.859	Shogun
86	40	40.7993	Shogun
87	36	35.2194	Shogun
88	29	40.3435	Shogun
89	30	50.1558	Shogun
90	54	45.6771	Shogun
91	46	51.4556	Shogun
92	43	41.8696	Shogun
93	54	47.4033	Shogun
94	31	44.1797	Shogun
95	26	50.4175	Shogun
96	49	53.1725	Shogun
97	63	52.2086	Shogun
98	57	51.4398	Shogun
99	25	47.5664	Shogun
100	46	45.792	Shogun
101	46	38.9417	Shogun
102	59	44.8948	Shogun
103	46	44.437	Shogun
104	47	43.4271	Shogun
105	58	48.4935	Shogun
106	20	51.0984	Shogun
107	49	45.5316	Shogun
108	34	29.3212	Shogun
109	40	36.909	Shogun
110	60	49.9194	Shogun
111	38	47.4443	Shogun
112	46	38.8726	Shogun
113	68	42.3503	Shogun
114	34	46.438	Shogun
115	66	41.3521	Shogun
116	63	48.3059	Shogun
117	49	51.6548	Shogun
118	61	47.4043	Shogun
119	26	39.1222	Shogun
120	36	47.0536	Shogun
121	52	58.1469	Shogun
122	51	42.7717	Shogun
123	50	45.6098	Shogun
124	49	43.5745	Shogun
125	50	45.7496	Shogun
126	44	38.8329	Shogun
127	21	43.9519	Shogun
128	48	47.226	Shogun
129	24	46.0952	Shogun
130	41	44.2241	Shogun
131	25	48.4324	Shogun
132	25	44.3276	Shogun
133	42	49.0175	Shogun
134	26	47.1676	Shogun
135	55	44.9542	Shogun
136	47	43.3168	Shogun
137	58	43.5155	Shogun
138	50	46.7313	Shogun

## Sheet: EDF 8h
	permuted	variable	value
1	TRUE	aucroc	0.596667
2	TRUE	aucroc	0.621667
3	TRUE	aucroc	0.681667
4	TRUE	aucroc	0.53
5	TRUE	aucroc	0.543333
6	TRUE	aucroc	0.741667
7	TRUE	aucroc	0.623333
8	TRUE	aucroc	0.566667
9	TRUE	aucroc	0.546667
10	TRUE	aucroc	0.576667
11	TRUE	aucroc	0.615
12	TRUE	aucroc	0.651667
13	TRUE	aucroc	0.663333
14	TRUE	aucroc	0.645
15	TRUE	aucroc	0.546667
16	TRUE	aucroc	0.686667
17	TRUE	aucroc	0.616667
18	TRUE	aucroc	0.685
19	TRUE	aucroc	0.645
20	TRUE	aucroc	0.585
21	TRUE	aucroc	0.62
22	TRUE	aucroc	0.615
23	TRUE	aucroc	0.611667
24	TRUE	aucroc	0.53
25	TRUE	aucroc	0.58
26	TRUE	aucroc	0.681667
27	TRUE	aucroc	0.635
28	TRUE	aucroc	0.633333
29	TRUE	aucroc	0.601667
30	TRUE	aucroc	0.613333
31	TRUE	aucroc	0.651667
32	TRUE	aucroc	0.641667
33	TRUE	aucroc	0.593333
34	TRUE	aucroc	0.701667
35	TRUE	aucroc	0.666667
36	TRUE	aucroc	0.628333
37	TRUE	aucroc	0.731667
38	TRUE	aucroc	0.566667
39	TRUE	aucroc	0.67
40	TRUE	aucroc	0.658333
41	TRUE	aucroc	0.611667
42	TRUE	aucroc	0.575
43	TRUE	aucroc	0.59
44	TRUE	aucroc	0.656667
45	TRUE	aucroc	0.573333
46	TRUE	aucroc	0.691667
47	TRUE	aucroc	0.671667
48	TRUE	aucroc	0.718333
49	TRUE	aucroc	0.631667
50	TRUE	aucroc	0.685
51	TRUE	aucroc	0.625
52	TRUE	aucroc	0.631667
53	TRUE	aucroc	0.555
54	TRUE	aucroc	0.62
55	TRUE	aucroc	0.54
56	TRUE	aucroc	0.683333
57	TRUE	aucroc	0.718333
58	TRUE	aucroc	0.671667
59	TRUE	aucroc	0.618333
60	TRUE	aucroc	0.598333
61	TRUE	aucroc	0.601667
62	TRUE	aucroc	0.595
63	TRUE	aucroc	0.595
64	TRUE	aucroc	0.583333
65	TRUE	aucroc	0.455
66	TRUE	aucroc	0.59
67	TRUE	aucroc	0.648333
68	TRUE	aucroc	0.7
69	TRUE	aucroc	0.635
70	TRUE	aucroc	0.461667
71	TRUE	aucroc	0.626667
72	TRUE	aucroc	0.623333
73	TRUE	aucroc	0.623333
74	TRUE	aucroc	0.551667
75	TRUE	aucroc	0.61
76	TRUE	aucroc	0.658333
77	TRUE	aucroc	0.675
78	TRUE	aucroc	0.681667
79	TRUE	aucroc	0.588333
80	TRUE	aucroc	0.565
81	TRUE	aucroc	0.57
82	TRUE	aucroc	0.603333
83	TRUE	aucroc	0.61
84	TRUE	aucroc	0.59
85	TRUE	aucroc	0.696667
86	TRUE	aucroc	0.633333
87	TRUE	aucroc	0.683333
88	TRUE	aucroc	0.638333
89	TRUE	aucroc	0.655
90	TRUE	aucroc	0.605
91	TRUE	aucroc	0.735
92	TRUE	aucroc	0.58
93	TRUE	aucroc	0.661667
94	TRUE	aucroc	0.52
95	TRUE	aucroc	0.563333
96	TRUE	aucroc	0.686667
97	TRUE	aucroc	0.68
98	TRUE	aucroc	0.558333
99	TRUE	aucroc	0.526667
100	TRUE	aucroc	0.638333
101	FALSE	aucroc	0.928333
102	FALSE	aucroc	0.925
103	FALSE	aucroc	0.901667
104	FALSE	aucroc	0.916667
105	FALSE	aucroc	0.905
106	FALSE	aucroc	0.896667
107	FALSE	aucroc	0.926667
108	FALSE	aucroc	0.863333
109	FALSE	aucroc	0.958333
110	FALSE	aucroc	0.921667
111	FALSE	aucroc	0.946667
112	FALSE	aucroc	0.938333
113	FALSE	aucroc	0.923333
114	FALSE	aucroc	0.893333
115	FALSE	aucroc	0.85
116	FALSE	aucroc	0.903333
117	FALSE	aucroc	0.846667
118	FALSE	aucroc	0.873333
119	FALSE	aucroc	0.908333
120	FALSE	aucroc	0.848333
121	FALSE	aucroc	0.936667
122	FALSE	aucroc	0.893333
123	FALSE	aucroc	0.91
124	FALSE	aucroc	0.928333
125	FALSE	aucroc	0.943333
126	FALSE	aucroc	0.87
127	FALSE	aucroc	0.921667
128	FALSE	aucroc	0.901667
129	FALSE	aucroc	0.953333
130	FALSE	aucroc	0.891667
131	FALSE	aucroc	0.846667
132	FALSE	aucroc	0.878333
133	FALSE	aucroc	0.971667
134	FALSE	aucroc	0.95
135	FALSE	aucroc	0.871667
136	FALSE	aucroc	0.956667
137	FALSE	aucroc	0.89
138	FALSE	aucroc	0.913333
139	FALSE	aucroc	0.941667
140	FALSE	aucroc	0.896667
141	FALSE	aucroc	0.931667
142	FALSE	aucroc	0.943333
143	FALSE	aucroc	0.89
144	FALSE	aucroc	0.913333
145	FALSE	aucroc	0.941667
146	FALSE	aucroc	0.896667
147	FALSE	aucroc	0.931667
148	FALSE	aucroc	0.943333
149	FALSE	aucroc	0.89
150	FALSE	aucroc	0.913333
151	FALSE	aucroc	0.941667
152	FALSE	aucroc	0.896667
153	FALSE	aucroc	0.931667
154	FALSE	aucroc	0.943333
155	FALSE	aucroc	0.89
156	FALSE	aucroc	0.913333
157	FALSE	aucroc	0.941667
158	FALSE	aucroc	0.896667
159	FALSE	aucroc	0.931667
160	FALSE	aucroc	0.943333
161	FALSE	aucroc	0.89
162	FALSE	aucroc	0.913333
163	FALSE	aucroc	0.941667
164	FALSE	aucroc	0.896667
165	FALSE	aucroc	0.931667
166	FALSE	aucroc	0.943333
167	FALSE	aucroc	0.89
168	FALSE	aucroc	0.913333
169	FALSE	aucroc	0.941667
170	FALSE	aucroc	0.896667
171	FALSE	aucroc	0.931667
172	FALSE	aucroc	0.943333
173	FALSE	aucroc	0.89
174	FALSE	aucroc	0.913333
175	FALSE	aucroc	0.941667
176	FALSE	aucroc	0.896667
177	FALSE	aucroc	0.931667
178	FALSE	aucroc	0.943333
179	FALSE	aucroc	0.89
180	FALSE	aucroc	0.913333
181	FALSE	aucroc	0.941667
182	FALSE	aucroc	0.896667
183	FALSE	aucroc	0.931667
184	FALSE	aucroc	0.943333
185	FALSE	aucroc	0.89
186	FALSE	aucroc	0.913333
187	FALSE	aucroc	0.941667
188	FALSE	aucroc	0.896667
189	FALSE	aucroc	0.931667
190	FALSE	aucroc	0.943333
191	FALSE	aucroc	0.89
192	FALSE	aucroc	0.913333
193	FALSE	aucroc	0.941667
194	FALSE	aucroc	0.896667
195	FALSE	aucroc	0.931667
196	FALSE	aucroc	0.943333
197	FALSE	aucroc	0.89
198	FALSE	aucroc	0.913333
199	FALSE	aucroc	0.941667
200	FALSE	aucroc	0.896667
201	TRUE	aupr	0.698412
202	TRUE	aupr	0.713846
203	TRUE	aupr	0.796487
204	TRUE	aupr	0.665889
205	TRUE	aupr	0.699398
206	TRUE	aupr	0.806615
207	TRUE	aupr	0.670295
208	TRUE	aupr	0.669026
209	TRUE	aupr	0.679306
210	TRUE	aupr	0.747448
211	TRUE	aupr	0.726181
212	TRUE	aupr	0.680839
213	TRUE	aupr	0.779354
214	TRUE	aupr	0.766426
215	TRUE	aupr	0.64533
216	TRUE	aupr	0.77947
217	TRUE	aupr	0.731117
218	TRUE	aupr	0.79798
219	TRUE	aupr	0.752461
220	TRUE	aupr	0.680638
221	TRUE	aupr	0.738305
222	TRUE	aupr	0.695268
223	TRUE	aupr	0.739665
224	TRUE	aupr	0.647741
225	TRUE	aupr	0.717075
226	TRUE	aupr	0.78886
227	TRUE	aupr	0.709677
228	TRUE	aupr	0.763102
229	TRUE	aupr	0.723635
230	TRUE	aupr	0.707755
231	TRUE	aupr	0.770379
232	TRUE	aupr	0.730311
233	TRUE	aupr	0.690572
234	TRUE	aupr	0.778612
235	TRUE	aupr	0.790243
236	TRUE	aupr	0.733345
237	TRUE	aupr	0.823015
238	TRUE	aupr	0.727126
239	TRUE	aupr	0.821953
240	TRUE	aupr	0.785786
241	TRUE	aupr	0.699525
242	TRUE	aupr	0.701883
243	TRUE	aupr	0.653997
244	TRUE	aupr	0.714827
245	TRUE	aupr	0.713869
246	TRUE	aupr	0.824439
247	TRUE	aupr	0.700449
248	TRUE	aupr	0.771144
249	TRUE	aupr	0.712059
250	TRUE	aupr	0.789002
251	TRUE	aupr	0.729797
252	TRUE	aupr	0.738696
253	TRUE	aupr	0.739411
254	TRUE	aupr	0.764968
255	TRUE	aupr	0.643089
256	TRUE	aupr	0.786045
257	TRUE	aupr	0.835428
258	TRUE	aupr	0.758254
259	TRUE	aupr	0.785063
260	TRUE	aupr	0.726271
261	TRUE	aupr	0.767587
262	TRUE	aupr	0.699895
263	TRUE	aupr	0.751048
264	TRUE	aupr	0.712505
265	TRUE	aupr	0.641734
266	TRUE	aupr	0.691778
267	TRUE	aupr	0.768811
268	TRUE	aupr	0.787989
269	TRUE	aupr	0.729333
270	TRUE	aupr	0.564663
271	TRUE	aupr	0.752466
272	TRUE	aupr	0.724356
273	TRUE	aupr	0.723109
274	TRUE	aupr	0.699664
275	TRUE	aupr	0.720784
276	TRUE	aupr	0.757752
277	TRUE	aupr	0.729712
278	TRUE	aupr	0.804957
279	TRUE	aupr	0.700305
280	TRUE	aupr	0.652298
281	TRUE	aupr	0.721515
282	TRUE	aupr	0.699992
283	TRUE	aupr	0.738829
284	TRUE	aupr	0.739354
285	TRUE	aupr	0.810771
286	TRUE	aupr	0.711551
287	TRUE	aupr	0.779252
288	TRUE	aupr	0.748512
289	TRUE	aupr	0.797612
290	TRUE	aupr	0.744807
291	TRUE	aupr	0.804596
292	TRUE	aupr	0.714853
293	TRUE	aupr	0.781407
294	TRUE	aupr	0.710647
295	TRUE	aupr	0.677959
296	TRUE	aupr	0.808889
297	TRUE	aupr	0.797773
298	TRUE	aupr	0.716923
299	TRUE	aupr	0.66984
300	TRUE	aupr	0.782163
301	FALSE	aupr	0.955739
302	FALSE	aupr	0.943543
303	FALSE	aupr	0.946408
304	FALSE	aupr	0.943939
305	FALSE	aupr	0.948162
306	FALSE	aupr	0.925279
307	FALSE	aupr	0.954789
308	FALSE	aupr	0.907871
309	FALSE	aupr	0.973682
310	FALSE	aupr	0.951813
311	FALSE	aupr	0.971705
312	FALSE	aupr	0.954765
313	FALSE	aupr	0.954784
314	FALSE	aupr	0.931923
315	FALSE	aupr	0.912571
316	FALSE	aupr	0.936102
317	FALSE	aupr	0.908989
318	FALSE	aupr	0.91806
319	FALSE	aupr	0.940873
320	FALSE	aupr	0.906442
321	FALSE	aupr	0.959618
322	FALSE	aupr	0.932295
323	FALSE	aupr	0.901887
324	FALSE	aupr	0.948116
325	FALSE	aupr	0.96384
326	FALSE	aupr	0.9201
327	FALSE	aupr	0.94567
328	FALSE	aupr	0.902007
329	FALSE	aupr	0.969774
330	FALSE	aupr	0.873471
331	FALSE	aupr	0.897868
332	FALSE	aupr	0.930202
333	FALSE	aupr	0.981374
334	FALSE	aupr	0.971346
335	FALSE	aupr	0.867868
336	FALSE	aupr	0.967906
337	FALSE	aupr	0.914243
338	FALSE	aupr	0.943724
339	FALSE	aupr	0.964561
340	FALSE	aupr	0.922826
341	FALSE	aupr	0.956785
342	FALSE	aupr	0.969226
343	FALSE	aupr	0.914243
344	FALSE	aupr	0.943724
345	FALSE	aupr	0.964561
346	FALSE	aupr	0.922826
347	FALSE	aupr	0.956785
348	FALSE	aupr	0.969226
349	FALSE	aupr	0.914243
350	FALSE	aupr	0.943724
351	FALSE	aupr	0.964561
352	FALSE	aupr	0.922826
353	FALSE	aupr	0.956785
354	FALSE	aupr	0.969226
355	FALSE	aupr	0.914243
356	FALSE	aupr	0.943724
357	FALSE	aupr	0.964561
358	FALSE	aupr	0.922826
359	FALSE	aupr	0.956785
360	FALSE	aupr	0.969226
361	FALSE	aupr	0.914243
362	FALSE	aupr	0.943724
363	FALSE	aupr	0.964561
364	FALSE	aupr	0.922826
365	FALSE	aupr	0.956785
366	FALSE	aupr	0.969226
367	FALSE	aupr	0.914243
368	FALSE	aupr	0.943724
369	FALSE	aupr	0.964561
370	FALSE	aupr	0.922826
371	FALSE	aupr	0.956785
372	FALSE	aupr	0.969226
373	FALSE	aupr	0.914243
374	FALSE	aupr	0.943724
375	FALSE	aupr	0.964561
376	FALSE	aupr	0.922826
377	FALSE	aupr	0.956785
378	FALSE	aupr	0.969226
379	FALSE	aupr	0.914243
380	FALSE	aupr	0.943724
381	FALSE	aupr	0.964561
382	FALSE	aupr	0.922826
383	FALSE	aupr	0.956785
384	FALSE	aupr	0.969226
385	FALSE	aupr	0.914243
386	FALSE	aupr	0.943724
387	FALSE	aupr	0.964561
388	FALSE	aupr	0.922826
389	FALSE	aupr	0.956785
390	FALSE	aupr	0.969226
391	FALSE	aupr	0.914243
392	FALSE	aupr	0.943724
393	FALSE	aupr	0.964561
394	FALSE	aupr	0.922826
395	FALSE	aupr	0.956785
396	FALSE	aupr	0.969226
397	FALSE	aupr	0.914243
398	FALSE	aupr	0.943724
399	FALSE	aupr	0.964561
400	FALSE	aupr	0.922826

## Sheet: EDF 8i
	permuted	variable	value
1	TRUE	aucroc	0.848333
2	TRUE	aucroc	0.766667
3	TRUE	aucroc	0.875
4	TRUE	aucroc	0.845
5	TRUE	aucroc	0.76
6	TRUE	aucroc	0.79
7	TRUE	aucroc	0.808333
8	TRUE	aucroc	0.713333
9	TRUE	aucroc	0.773333
10	TRUE	aucroc	0.858333
11	TRUE	aucroc	0.796667
12	TRUE	aucroc	0.781667
13	TRUE	aucroc	0.76
14	TRUE	aucroc	0.788333
15	TRUE	aucroc	0.81
16	TRUE	aucroc	0.811667
17	TRUE	aucroc	0.818333
18	TRUE	aucroc	0.725
19	TRUE	aucroc	0.826667
20	TRUE	aucroc	0.86
21	TRUE	aucroc	0.706667
22	TRUE	aucroc	0.783333
23	TRUE	aucroc	0.796667
24	TRUE	aucroc	0.915
25	TRUE	aucroc	0.888333
26	TRUE	aucroc	0.74
27	TRUE	aucroc	0.773333
28	TRUE	aucroc	0.848333
29	TRUE	aucroc	0.745
30	TRUE	aucroc	0.863333
31	TRUE	aucroc	0.801667
32	TRUE	aucroc	0.758333
33	TRUE	aucroc	0.751667
34	TRUE	aucroc	0.846667
35	TRUE	aucroc	0.87
36	TRUE	aucroc	0.806667
37	TRUE	aucroc	0.848333
38	TRUE	aucroc	0.72
39	TRUE	aucroc	0.841667
40	TRUE	aucroc	0.8
41	TRUE	aucroc	0.856667
42	TRUE	aucroc	0.723333
43	TRUE	aucroc	0.926667
44	TRUE	aucroc	0.798333
45	TRUE	aucroc	0.87
46	TRUE	aucroc	0.738333
47	TRUE	aucroc	0.836667
48	TRUE	aucroc	0.855
49	TRUE	aucroc	0.825
50	TRUE	aucroc	0.748333
51	TRUE	aucroc	0.82
52	TRUE	aucroc	0.725
53	TRUE	aucroc	0.743333
54	TRUE	aucroc	0.75
55	TRUE	aucroc	0.875
56	TRUE	aucroc	0.806667
57	TRUE	aucroc	0.805
58	TRUE	aucroc	0.753333
59	TRUE	aucroc	0.785
60	TRUE	aucroc	0.771667
61	TRUE	aucroc	0.796667
62	TRUE	aucroc	0.773333
63	TRUE	aucroc	0.771667
64	TRUE	aucroc	0.63
65	TRUE	aucroc	0.781667
66	TRUE	aucroc	0.816667
67	TRUE	aucroc	0.591667
68	TRUE	aucroc	0.788333
69	TRUE	aucroc	0.713333
70	TRUE	aucroc	0.753333
71	TRUE	aucroc	0.816667
72	TRUE	aucroc	0.783333
73	TRUE	aucroc	0.873333
74	TRUE	aucroc	0.741667
75	TRUE	aucroc	0.881667
76	TRUE	aucroc	0.88
77	TRUE	aucroc	0.886667
78	TRUE	aucroc	0.683333
79	TRUE	aucroc	0.785
80	TRUE	aucroc	0.848333
81	TRUE	aucroc	0.83
82	TRUE	aucroc	0.78
83	TRUE	aucroc	0.885
84	TRUE	aucroc	0.811667
85	TRUE	aucroc	0.798333
86	TRUE	aucroc	0.818333
87	TRUE	aucroc	0.73
88	TRUE	aucroc	0.863333
89	TRUE	aucroc	0.918333
90	TRUE	aucroc	0.745
91	TRUE	aucroc	0.811667
92	TRUE	aucroc	0.888333
93	TRUE	aucroc	0.796667
94	TRUE	aucroc	0.856667
95	TRUE	aucroc	0.868333
96	TRUE	aucroc	0.806667
97	TRUE	aucroc	0.815
98	TRUE	aucroc	0.803333
99	TRUE	aucroc	0.82
100	TRUE	aucroc	0.798333
101	FALSE	aucroc	0.906667
102	FALSE	aucroc	0.891667
103	FALSE	aucroc	0.893333
104	FALSE	aucroc	0.835
105	FALSE	aucroc	0.816667
106	FALSE	aucroc	0.773333
107	FALSE	aucroc	0.825
108	FALSE	aucroc	0.86
109	FALSE	aucroc	0.913333
110	FALSE	aucroc	0.81
111	FALSE	aucroc	0.826667
112	FALSE	aucroc	0.868333
113	FALSE	aucroc	0.91
114	FALSE	aucroc	0.773333
115	FALSE	aucroc	0.875
116	FALSE	aucroc	0.91
117	FALSE	aucroc	0.928333
118	FALSE	aucroc	0.856667
119	FALSE	aucroc	0.885
120	FALSE	aucroc	0.845
121	FALSE	aucroc	0.905
122	FALSE	aucroc	0.875
123	FALSE	aucroc	0.89
124	FALSE	aucroc	0.918333
125	FALSE	aucroc	0.928333
126	FALSE	aucroc	0.851667
127	FALSE	aucroc	0.788333
128	FALSE	aucroc	0.876667
129	FALSE	aucroc	0.846667
130	FALSE	aucroc	0.89
131	FALSE	aucroc	0.951667
132	FALSE	aucroc	0.926667
133	FALSE	aucroc	0.848333
134	FALSE	aucroc	0.845
135	FALSE	aucroc	0.8
136	FALSE	aucroc	0.908333
137	FALSE	aucroc	0.82
138	FALSE	aucroc	0.883333
139	FALSE	aucroc	0.871667
140	FALSE	aucroc	0.865
141	FALSE	aucroc	0.861667
142	FALSE	aucroc	0.888333
143	FALSE	aucroc	0.843333
144	FALSE	aucroc	0.876667
145	FALSE	aucroc	0.803333
146	FALSE	aucroc	0.773333
147	FALSE	aucroc	0.878333
148	FALSE	aucroc	0.795
149	FALSE	aucroc	0.813333
150	FALSE	aucroc	0.851667
151	FALSE	aucroc	0.853333
152	FALSE	aucroc	0.915
153	FALSE	aucroc	0.915
154	FALSE	aucroc	0.925
155	FALSE	aucroc	0.893333
156	FALSE	aucroc	0.951667
157	FALSE	aucroc	0.921667
158	FALSE	aucroc	0.908333
159	FALSE	aucroc	0.895
160	FALSE	aucroc	0.901667
161	FALSE	aucroc	0.878333
162	FALSE	aucroc	0.848333
163	FALSE	aucroc	0.88
164	FALSE	aucroc	0.921667
165	FALSE	aucroc	0.73
166	FALSE	aucroc	0.821667
167	FALSE	aucroc	0.878333
168	FALSE	aucroc	0.901667
169	FALSE	aucroc	0.878333
170	FALSE	aucroc	0.848333
171	FALSE	aucroc	0.88
172	FALSE	aucroc	0.921667
173	FALSE	aucroc	0.73
174	FALSE	aucroc	0.821667
175	FALSE	aucroc	0.878333
176	FALSE	aucroc	0.901667
177	FALSE	aucroc	0.878333
178	FALSE	aucroc	0.848333
179	FALSE	aucroc	0.88
180	FALSE	aucroc	0.921667
181	FALSE	aucroc	0.73
182	FALSE	aucroc	0.821667
183	FALSE	aucroc	0.878333
184	FALSE	aucroc	0.901667
185	FALSE	aucroc	0.878333
186	FALSE	aucroc	0.848333
187	FALSE	aucroc	0.88
188	FALSE	aucroc	0.921667
189	FALSE	aucroc	0.73
190	FALSE	aucroc	0.821667
191	FALSE	aucroc	0.878333
192	FALSE	aucroc	0.901667
193	FALSE	aucroc	0.878333
194	FALSE	aucroc	0.848333
195	FALSE	aucroc	0.88
196	FALSE	aucroc	0.921667
197	FALSE	aucroc	0.73
198	FALSE	aucroc	0.821667
199	FALSE	aucroc	0.878333
200	FALSE	aucroc	0.901667
201	TRUE	aupr	0.88329
202	TRUE	aupr	0.859966
203	TRUE	aupr	0.920259
204	TRUE	aupr	0.891476
205	TRUE	aupr	0.870101
206	TRUE	aupr	0.847324
207	TRUE	aupr	0.886677
208	TRUE	aupr	0.814149
209	TRUE	aupr	0.841368
210	TRUE	aupr	0.898974
211	TRUE	aupr	0.888874
212	TRUE	aupr	0.848581
213	TRUE	aupr	0.830902
214	TRUE	aupr	0.836868
215	TRUE	aupr	0.870774
216	TRUE	aupr	0.888541
217	TRUE	aupr	0.887927
218	TRUE	aupr	0.831099
219	TRUE	aupr	0.900584
220	TRUE	aupr	0.899772
221	TRUE	aupr	0.784509
222	TRUE	aupr	0.858533
223	TRUE	aupr	0.870546
224	TRUE	aupr	0.942177
225	TRUE	aupr	0.918999
226	TRUE	aupr	0.836589
227	TRUE	aupr	0.84487
228	TRUE	aupr	0.916223
229	TRUE	aupr	0.837401
230	TRUE	aupr	0.906281
231	TRUE	aupr	0.883472
232	TRUE	aupr	0.861027
233	TRUE	aupr	0.831785
234	TRUE	aupr	0.894258
235	TRUE	aupr	0.922511
236	TRUE	aupr	0.877576
237	TRUE	aupr	0.905386
238	TRUE	aupr	0.761834
239	TRUE	aupr	0.895849
240	TRUE	aupr	0.870556
241	TRUE	aupr	0.911938
242	TRUE	aupr	0.838679
243	TRUE	aupr	0.939025
244	TRUE	aupr	0.874969
245	TRUE	aupr	0.893786
246	TRUE	aupr	0.811532
247	TRUE	aupr	0.897354
248	TRUE	aupr	0.917976
249	TRUE	aupr	0.9082
250	TRUE	aupr	0.786299
251	TRUE	aupr	0.898377
252	TRUE	aupr	0.822477
253	TRUE	aupr	0.836146
254	TRUE	aupr	0.836107
255	TRUE	aupr	0.918353
256	TRUE	aupr	0.870948
257	TRUE	aupr	0.878741
258	TRUE	aupr	0.836127
259	TRUE	aupr	0.854506
260	TRUE	aupr	0.865656
261	TRUE	aupr	0.868302
262	TRUE	aupr	0.852343
263	TRUE	aupr	0.864917
264	TRUE	aupr	0.750798
265	TRUE	aupr	0.846748
266	TRUE	aupr	0.893259
267	TRUE	aupr	0.717766
268	TRUE	aupr	0.84561
269	TRUE	aupr	0.807704
270	TRUE	aupr	0.831235
271	TRUE	aupr	0.895686
272	TRUE	aupr	0.867227
273	TRUE	aupr	0.928262
274	TRUE	aupr	0.832564
275	TRUE	aupr	0.939194
276	TRUE	aupr	0.934933
277	TRUE	aupr	0.90229
278	TRUE	aupr	0.794574
279	TRUE	aupr	0.874617
280	TRUE	aupr	0.900075
281	TRUE	aupr	0.88894
282	TRUE	aupr	0.833499
283	TRUE	aupr	0.920634
284	TRUE	aupr	0.893785
285	TRUE	aupr	0.891275
286	TRUE	aupr	0.885936
287	TRUE	aupr	0.832513
288	TRUE	aupr	0.902044
289	TRUE	aupr	0.939336
290	TRUE	aupr	0.842544
291	TRUE	aupr	0.888214
292	TRUE	aupr	0.932988
293	TRUE	aupr	0.879512
294	TRUE	aupr	0.90246
295	TRUE	aupr	0.920712
296	TRUE	aupr	0.882748
297	TRUE	aupr	0.885062
298	TRUE	aupr	0.834106
299	TRUE	aupr	0.877544
300	TRUE	aupr	0.88301
301	FALSE	aupr	0.938605
302	FALSE	aupr	0.930115
303	FALSE	aupr	0.927652
304	FALSE	aupr	0.891845
305	FALSE	aupr	0.896486
306	FALSE	aupr	0.864364
307	FALSE	aupr	0.846239
308	FALSE	aupr	0.912544
309	FALSE	aupr	0.952562
310	FALSE	aupr	0.882648
311	FALSE	aupr	0.901466
312	FALSE	aupr	0.925989
313	FALSE	aupr	0.935933
314	FALSE	aupr	0.862502
315	FALSE	aupr	0.927961
316	FALSE	aupr	0.951014
317	FALSE	aupr	0.945671
318	FALSE	aupr	0.91154
319	FALSE	aupr	0.937558
320	FALSE	aupr	0.908974
321	FALSE	aupr	0.936621
322	FALSE	aupr	0.929289
323	FALSE	aupr	0.930326
324	FALSE	aupr	0.953159
325	FALSE	aupr	0.960915
326	FALSE	aupr	0.91507
327	FALSE	aupr	0.849719
328	FALSE	aupr	0.91427
329	FALSE	aupr	0.912999
330	FALSE	aupr	0.924651
331	FALSE	aupr	0.966326
332	FALSE	aupr	0.958037
333	FALSE	aupr	0.915208
334	FALSE	aupr	0.909372
335	FALSE	aupr	0.831453
336	FALSE	aupr	0.916784
337	FALSE	aupr	0.885999
338	FALSE	aupr	0.925863
339	FALSE	aupr	0.918677
340	FALSE	aupr	0.919962
341	FALSE	aupr	0.915464
342	FALSE	aupr	0.936957
343	FALSE	aupr	0.900585
344	FALSE	aupr	0.923406
345	FALSE	aupr	0.881828
346	FALSE	aupr	0.863066
347	FALSE	aupr	0.924855
348	FALSE	aupr	0.837258
349	FALSE	aupr	0.898749
350	FALSE	aupr	0.908589
351	FALSE	aupr	0.901354
352	FALSE	aupr	0.944385
353	FALSE	aupr	0.949136
354	FALSE	aupr	0.957337
355	FALSE	aupr	0.928399
356	FALSE	aupr	0.970259
357	FALSE	aupr	0.945878
358	FALSE	aupr	0.95287
359	FALSE	aupr	0.936436
360	FALSE	aupr	0.938164
361	FALSE	aupr	0.923967
362	FALSE	aupr	0.902092
363	FALSE	aupr	0.924258
364	FALSE	aupr	0.953552
365	FALSE	aupr	0.820171
366	FALSE	aupr	0.892134
367	FALSE	aupr	0.927689
368	FALSE	aupr	0.938164
369	FALSE	aupr	0.923967
370	FALSE	aupr	0.902092
371	FALSE	aupr	0.924258
372	FALSE	aupr	0.953552
373	FALSE	aupr	0.820171
374	FALSE	aupr	0.892134
375	FALSE	aupr	0.927689
376	FALSE	aupr	0.938164
377	FALSE	aupr	0.923967
378	FALSE	aupr	0.902092
379	FALSE	aupr	0.924258
380	FALSE	aupr	0.953552
381	FALSE	aupr	0.820171
382	FALSE	aupr	0.892134
383	FALSE	aupr	0.927689
384	FALSE	aupr	0.938164
385	FALSE	aupr	0.923967
386	FALSE	aupr	0.902092
387	FALSE	aupr	0.924258
388	FALSE	aupr	0.953552
389	FALSE	aupr	0.820171
390	FALSE	aupr	0.892134
391	FALSE	aupr	0.927689
392	FALSE	aupr	0.938164
393	FALSE	aupr	0.923967
394	FALSE	aupr	0.902092
395	FALSE	aupr	0.924258
396	FALSE	aupr	0.953552
397	FALSE	aupr	0.820171
398	FALSE	aupr	0.892134
399	FALSE	aupr	0.927689
400	FALSE	aupr	0.938164

## Sheet: EDF 8j
	permuted	variable	value
1	TRUE	aucroc	0.578333
2	TRUE	aucroc	0.676667
3	TRUE	aucroc	0.576667
4	TRUE	aucroc	0.585
5	TRUE	aucroc	0.603333
6	TRUE	aucroc	0.556667
7	TRUE	aucroc	0.633333
8	TRUE	aucroc	0.701667
9	TRUE	aucroc	0.535
10	TRUE	aucroc	0.63
11	TRUE	aucroc	0.565
12	TRUE	aucroc	0.593333
13	TRUE	aucroc	0.63
14	TRUE	aucroc	0.648333
15	TRUE	aucroc	0.613333
16	TRUE	aucroc	0.713333
17	TRUE	aucroc	0.568333
18	TRUE	aucroc	0.523333
19	TRUE	aucroc	0.636667
20	TRUE	aucroc	0.598333
21	TRUE	aucroc	0.573333
22	TRUE	aucroc	0.538333
23	TRUE	aucroc	0.618333
24	TRUE	aucroc	0.555
25	TRUE	aucroc	0.591667
26	TRUE	aucroc	0.65
27	TRUE	aucroc	0.661667
28	TRUE	aucroc	0.61
29	TRUE	aucroc	0.626667
30	TRUE	aucroc	0.546667
31	TRUE	aucroc	0.653333
32	TRUE	aucroc	0.713333
33	TRUE	aucroc	0.606667
34	TRUE	aucroc	0.621667
35	TRUE	aucroc	0.635
36	TRUE	aucroc	0.703333
37	TRUE	aucroc	0.588333
38	TRUE	aucroc	0.55
39	TRUE	aucroc	0.591667
40	TRUE	aucroc	0.671667
41	TRUE	aucroc	0.563333
42	TRUE	aucroc	0.571667
43	TRUE	aucroc	0.546667
44	TRUE	aucroc	0.688333
45	TRUE	aucroc	0.571667
46	TRUE	aucroc	0.635
47	TRUE	aucroc	0.631667
48	TRUE	aucroc	0.608333
49	TRUE	aucroc	0.596667
50	TRUE	aucroc	0.64
51	TRUE	aucroc	0.608333
52	TRUE	aucroc	0.621667
53	TRUE	aucroc	0.77
54	TRUE	aucroc	0.64
55	TRUE	aucroc	0.595
56	TRUE	aucroc	0.555
57	TRUE	aucroc	0.67
58	TRUE	aucroc	0.556667
59	TRUE	aucroc	0.653333
60	TRUE	aucroc	0.536667
61	TRUE	aucroc	0.618333
62	TRUE	aucroc	0.56
63	TRUE	aucroc	0.591667
64	TRUE	aucroc	0.486667
65	TRUE	aucroc	0.605
66	TRUE	aucroc	0.78
67	TRUE	aucroc	0.611667
68	TRUE	aucroc	0.571667
69	TRUE	aucroc	0.66
70	TRUE	aucroc	0.635
71	TRUE	aucroc	0.606667
72	TRUE	aucroc	0.731667
73	TRUE	aucroc	0.613333
74	TRUE	aucroc	0.655
75	TRUE	aucroc	0.556667
76	TRUE	aucroc	0.536667
77	TRUE	aucroc	0.67
78	TRUE	aucroc	0.611667
79	TRUE	aucroc	0.568333
80	TRUE	aucroc	0.605
81	TRUE	aucroc	0.685
82	TRUE	aucroc	0.586667
83	TRUE	aucroc	0.726667
84	TRUE	aucroc	0.593333
85	TRUE	aucroc	0.591667
86	TRUE	aucroc	0.65
87	TRUE	aucroc	0.65
88	TRUE	aucroc	0.553333
89	TRUE	aucroc	0.67
90	TRUE	aucroc	0.63
91	TRUE	aucroc	0.736667
92	TRUE	aucroc	0.486667
93	TRUE	aucroc	0.603333
94	TRUE	aucroc	0.605
95	TRUE	aucroc	0.706667
96	TRUE	aucroc	0.628333
97	TRUE	aucroc	0.496667
98	TRUE	aucroc	0.636667
99	TRUE	aucroc	0.52
100	TRUE	aucroc	0.625
101	FALSE	aucroc	0.918333
102	FALSE	aucroc	0.98
103	FALSE	aucroc	0.905
104	FALSE	aucroc	0.971667
105	FALSE	aucroc	0.931667
106	FALSE	aucroc	0.931667
107	FALSE	aucroc	0.928333
108	FALSE	aucroc	0.868333
109	FALSE	aucroc	0.946667
110	FALSE	aucroc	0.966667
111	FALSE	aucroc	0.928333
112	FALSE	aucroc	0.915
113	FALSE	aucroc	0.908333
114	FALSE	aucroc	0.883333
115	FALSE	aucroc	0.85
116	FALSE	aucroc	0.96
117	FALSE	aucroc	0.953333
118	FALSE	aucroc	0.926667
119	FALSE	aucroc	0.903333
120	FALSE	aucroc	0.855
121	FALSE	aucroc	0.951667
122	FALSE	aucroc	0.965
123	FALSE	aucroc	0.943333
124	FALSE	aucroc	0.88
125	FALSE	aucroc	0.913333
126	FALSE	aucroc	0.898333
127	FALSE	aucroc	0.946667
128	FALSE	aucroc	0.913333
129	FALSE	aucroc	0.858333
130	FALSE	aucroc	0.961667
131	FALSE	aucroc	0.876667
132	FALSE	aucroc	0.875
133	FALSE	aucroc	0.95
134	FALSE	aucroc	0.875
135	FALSE	aucroc	0.963333
136	FALSE	aucroc	0.918333
137	FALSE	aucroc	0.84
138	FALSE	aucroc	0.875
139	FALSE	aucroc	0.94
140	FALSE	aucroc	0.923333
141	FALSE	aucroc	0.925
142	FALSE	aucroc	0.941667
143	FALSE	aucroc	0.848333
144	FALSE	aucroc	0.893333
145	FALSE	aucroc	0.928333
146	FALSE	aucroc	0.871667
147	FALSE	aucroc	0.913333
148	FALSE	aucroc	0.898333
149	FALSE	aucroc	0.946667
150	FALSE	aucroc	0.913333
151	FALSE	aucroc	0.858333
152	FALSE	aucroc	0.961667
153	FALSE	aucroc	0.876667
154	FALSE	aucroc	0.875
155	FALSE	aucroc	0.95
156	FALSE	aucroc	0.875
157	FALSE	aucroc	0.963333
158	FALSE	aucroc	0.918333
159	FALSE	aucroc	0.84
160	FALSE	aucroc	0.875
161	FALSE	aucroc	0.94
162	FALSE	aucroc	0.923333
163	FALSE	aucroc	0.925
164	FALSE	aucroc	0.941667
165	FALSE	aucroc	0.848333
166	FALSE	aucroc	0.893333
167	FALSE	aucroc	0.928333
168	FALSE	aucroc	0.871667
169	FALSE	aucroc	0.913333
170	FALSE	aucroc	0.898333
171	FALSE	aucroc	0.946667
172	FALSE	aucroc	0.913333
173	FALSE	aucroc	0.858333
174	FALSE	aucroc	0.961667
175	FALSE	aucroc	0.876667
176	FALSE	aucroc	0.875
177	FALSE	aucroc	0.95
178	FALSE	aucroc	0.875
179	FALSE	aucroc	0.963333
180	FALSE	aucroc	0.918333
181	FALSE	aucroc	0.84
182	FALSE	aucroc	0.875
183	FALSE	aucroc	0.94
184	FALSE	aucroc	0.923333
185	FALSE	aucroc	0.925
186	FALSE	aucroc	0.941667
187	FALSE	aucroc	0.848333
188	FALSE	aucroc	0.893333
189	FALSE	aucroc	0.928333
190	FALSE	aucroc	0.871667
191	FALSE	aucroc	0.913333
192	FALSE	aucroc	0.898333
193	FALSE	aucroc	0.946667
194	FALSE	aucroc	0.913333
195	FALSE	aucroc	0.858333
196	FALSE	aucroc	0.961667
197	FALSE	aucroc	0.876667
198	FALSE	aucroc	0.875
199	FALSE	aucroc	0.95
200	FALSE	aucroc	0.875
201	TRUE	aupr	0.652205
202	TRUE	aupr	0.807829
203	TRUE	aupr	0.688738
204	TRUE	aupr	0.682433
205	TRUE	aupr	0.766634
206	TRUE	aupr	0.711659
207	TRUE	aupr	0.777205
208	TRUE	aupr	0.792119
209	TRUE	aupr	0.637006
210	TRUE	aupr	0.712088
211	TRUE	aupr	0.629617
212	TRUE	aupr	0.736483
213	TRUE	aupr	0.782661
214	TRUE	aupr	0.768711
215	TRUE	aupr	0.725347
216	TRUE	aupr	0.814099
217	TRUE	aupr	0.691917
218	TRUE	aupr	0.653254
219	TRUE	aupr	0.754853
220	TRUE	aupr	0.742532
221	TRUE	aupr	0.714908
222	TRUE	aupr	0.681421
223	TRUE	aupr	0.749022
224	TRUE	aupr	0.674063
225	TRUE	aupr	0.655473
226	TRUE	aupr	0.789992
227	TRUE	aupr	0.772829
228	TRUE	aupr	0.697125
229	TRUE	aupr	0.743449
230	TRUE	aupr	0.671409
231	TRUE	aupr	0.754372
232	TRUE	aupr	0.825197
233	TRUE	aupr	0.743974
234	TRUE	aupr	0.771664
235	TRUE	aupr	0.767009
236	TRUE	aupr	0.814024
237	TRUE	aupr	0.717978
238	TRUE	aupr	0.67738
239	TRUE	aupr	0.710453
240	TRUE	aupr	0.804524
241	TRUE	aupr	0.688114
242	TRUE	aupr	0.716042
243	TRUE	aupr	0.64002
244	TRUE	aupr	0.820711
245	TRUE	aupr	0.67418
246	TRUE	aupr	0.750474
247	TRUE	aupr	0.755342
248	TRUE	aupr	0.678125
249	TRUE	aupr	0.73618
250	TRUE	aupr	0.780429
251	TRUE	aupr	0.726792
252	TRUE	aupr	0.735349
253	TRUE	aupr	0.812517
254	TRUE	aupr	0.741205
255	TRUE	aupr	0.639597
256	TRUE	aupr	0.699378
257	TRUE	aupr	0.799896
258	TRUE	aupr	0.707402
259	TRUE	aupr	0.789855
260	TRUE	aupr	0.696654
261	TRUE	aupr	0.718706
262	TRUE	aupr	0.688546
263	TRUE	aupr	0.725473
264	TRUE	aupr	0.625663
265	TRUE	aupr	0.667752
266	TRUE	aupr	0.824457
267	TRUE	aupr	0.702792
268	TRUE	aupr	0.737075
269	TRUE	aupr	0.760381
270	TRUE	aupr	0.776047
271	TRUE	aupr	0.735956
272	TRUE	aupr	0.849098
273	TRUE	aupr	0.683486
274	TRUE	aupr	0.773999
275	TRUE	aupr	0.718297
276	TRUE	aupr	0.657301
277	TRUE	aupr	0.733008
278	TRUE	aupr	0.746617
279	TRUE	aupr	0.729863
280	TRUE	aupr	0.726552
281	TRUE	aupr	0.8314
282	TRUE	aupr	0.63774
283	TRUE	aupr	0.808954
284	TRUE	aupr	0.714968
285	TRUE	aupr	0.725865
286	TRUE	aupr	0.778673
287	TRUE	aupr	0.760027
288	TRUE	aupr	0.658493
289	TRUE	aupr	0.780653
290	TRUE	aupr	0.739787
291	TRUE	aupr	0.823655
292	TRUE	aupr	0.624675
293	TRUE	aupr	0.750095
294	TRUE	aupr	0.7416
295	TRUE	aupr	0.809096
296	TRUE	aupr	0.74957
297	TRUE	aupr	0.672515
298	TRUE	aupr	0.774536
299	TRUE	aupr	0.616261
300	TRUE	aupr	0.770171
301	FALSE	aupr	0.96065
302	FALSE	aupr	0.987125
303	FALSE	aupr	0.933158
304	FALSE	aupr	0.982336
305	FALSE	aupr	0.952715
306	FALSE	aupr	0.962086
307	FALSE	aupr	0.948801
308	FALSE	aupr	0.927094
309	FALSE	aupr	0.965025
310	FALSE	aupr	0.977202
311	FALSE	aupr	0.952616
312	FALSE	aupr	0.948279
313	FALSE	aupr	0.944069
314	FALSE	aupr	0.897688
315	FALSE	aupr	0.899445
316	FALSE	aupr	0.979281
317	FALSE	aupr	0.973683
318	FALSE	aupr	0.955371
319	FALSE	aupr	0.939851
320	FALSE	aupr	0.899392
321	FALSE	aupr	0.97082
322	FALSE	aupr	0.973024
323	FALSE	aupr	0.966391
324	FALSE	aupr	0.929826
325	FALSE	aupr	0.918507
326	FALSE	aupr	0.93561
327	FALSE	aupr	0.972421
328	FALSE	aupr	0.945078
329	FALSE	aupr	0.900213
330	FALSE	aupr	0.977081
331	FALSE	aupr	0.907633
332	FALSE	aupr	0.901406
333	FALSE	aupr	0.967801
334	FALSE	aupr	0.926561
335	FALSE	aupr	0.974318
336	FALSE	aupr	0.944031
337	FALSE	aupr	0.888638
338	FALSE	aupr	0.932067
339	FALSE	aupr	0.956086
340	FALSE	aupr	0.957085
341	FALSE	aupr	0.955577
342	FALSE	aupr	0.963199
343	FALSE	aupr	0.911466
344	FALSE	aupr	0.927648
345	FALSE	aupr	0.947179
346	FALSE	aupr	0.915498
347	FALSE	aupr	0.918507
348	FALSE	aupr	0.93561
349	FALSE	aupr	0.972421
350	FALSE	aupr	0.945078
351	FALSE	aupr	0.900213
352	FALSE	aupr	0.977081
353	FALSE	aupr	0.907633
354	FALSE	aupr	0.901406
355	FALSE	aupr	0.967801
356	FALSE	aupr	0.926561
357	FALSE	aupr	0.974318
358	FALSE	aupr	0.944031
359	FALSE	aupr	0.888638
360	FALSE	aupr	0.932067
361	FALSE	aupr	0.956086
362	FALSE	aupr	0.957085
363	FALSE	aupr	0.955577
364	FALSE	aupr	0.963199
365	FALSE	aupr	0.911466
366	FALSE	aupr	0.927648
367	FALSE	aupr	0.947179
368	FALSE	aupr	0.915498
369	FALSE	aupr	0.918507
370	FALSE	aupr	0.93561
371	FALSE	aupr	0.972421
372	FALSE	aupr	0.945078
373	FALSE	aupr	0.900213
374	FALSE	aupr	0.977081
375	FALSE	aupr	0.907633
376	FALSE	aupr	0.901406
377	FALSE	aupr	0.967801
378	FALSE	aupr	0.926561
379	FALSE	aupr	0.974318
380	FALSE	aupr	0.944031
381	FALSE	aupr	0.888638
382	FALSE	aupr	0.932067
383	FALSE	aupr	0.956086
384	FALSE	aupr	0.957085
385	FALSE	aupr	0.955577
386	FALSE	aupr	0.963199
387	FALSE	aupr	0.911466
388	FALSE	aupr	0.927648
389	FALSE	aupr	0.947179
390	FALSE	aupr	0.915498
391	FALSE	aupr	0.918507
392	FALSE	aupr	0.93561
393	FALSE	aupr	0.972421
394	FALSE	aupr	0.945078
395	FALSE	aupr	0.900213
396	FALSE	aupr	0.977081
397	FALSE	aupr	0.907633
398	FALSE	aupr	0.901406
399	FALSE	aupr	0.967801
400	FALSE	aupr	0.926561

[truncated: 1 more sheets: EDF 8k]
