# Supplementary material for: RETRACTED ARTICLE: Microbiome analyses of blood and tissues suggest cancerdiagnostic approach
Source: Springer Nature journal article supplement (doi:10.1038/s41586-020-2095-1), 2020-03-11
Supplement: 41586_2020_2095_MOESM16_ESM.xlsx [file 41586_2020_2095_MOESM16_ESM.xlsx]

## Sheet: EDF 9a ROC
	FPR	Sensitivity
1	0	0
2	0	0.0333333
3	0	0.0666667
4	0	0.1
5	0	0.133333
6	0	0.166667
7	0	0.2
8	0	0.233333
9	0	0.266667
10	0	0.3
11	0	0.333333
12	0	0.366667
13	0	0.4
14	0	0.433333
15	0	0.466667
16	0	0.5
17	0	0.533333
18	0	0.566667
19	0	0.6
20	0	0.633333
21	0	0.666667
22	0.05	0.666667
23	0.05	0.7
24	0.1	0.7
25	0.1	0.733333
26	0.1	0.766667
27	0.15	0.766667
28	0.15	0.8
29	0.15	0.833333
30	0.15	0.866667
31	0.2	0.866667
32	0.25	0.866667
33	0.25	0.9
34	0.25	0.933333
35	0.3	0.933333
36	0.35	0.933333
37	0.4	0.933333
38	0.4	0.966667
39	0.45	0.966667
40	0.5	0.966667
41	0.55	0.966667
42	0.6	0.966667
43	0.65	0.966667
44	0.7	0.966667
45	0.75	0.966667
46	0.8	0.966667
47	0.85	0.966667
48	0.85	1
49	0.9	1
50	0.95	1
51	1	1
52	0	0
53	0	0.0333333
54	0	0.0666667
55	0	0.1
56	0	0.133333
57	0	0.166667
58	0	0.2
59	0	0.233333
60	0	0.266667
61	0	0.3
62	0	0.333333
63	0	0.366667
64	0	0.4
65	0	0.433333
66	0	0.466667
67	0	0.5
68	0	0.533333
69	0	0.566667
70	0	0.6
71	0	0.633333
72	0	0.666667
73	0	0.7
74	0	0.733333
75	0.05	0.733333
76	0.05	0.766667
77	0.05	0.8
78	0.1	0.8
79	0.15	0.8
80	0.2	0.8
81	0.25	0.8
82	0.25	0.833333
83	0.25	0.866667
84	0.25	0.9
85	0.25	0.933333
86	0.3	0.933333
87	0.35	0.933333
88	0.4	0.933333
89	0.45	0.933333
90	0.45	0.966667
91	0.5	0.966667
92	0.55	0.966667
93	0.6	0.966667
94	0.65	0.966667
95	0.65	1
96	0.7	1
97	0.75	1
98	0.8	1
99	0.85	1
100	0.9	1
101	0.95	1
102	1	1
103	0	0
104	0	0.0333333
105	0	0.0666667
106	0	0.1
107	0	0.133333
108	0	0.166667
109	0	0.2
110	0	0.233333
111	0	0.266667
112	0	0.3
113	0	0.333333
114	0	0.366667
115	0	0.4
116	0	0.433333
117	0	0.466667
118	0	0.5
119	0	0.533333
120	0	0.566667
121	0	0.6
122	0	0.633333
123	0.05	0.633333
124	0.05	0.666667
125	0.1	0.666667
126	0.1	0.7
127	0.1	0.733333
128	0.1	0.766667
129	0.1	0.8
130	0.1	0.833333
131	0.15	0.833333
132	0.2	0.833333
133	0.25	0.833333
134	0.25	0.866667
135	0.25	0.9
136	0.25	0.933333
137	0.25	0.966667
138	0.3	0.966667
139	0.35	0.966667
140	0.4	0.966667
141	0.45	0.966667
142	0.5	0.966667
143	0.55	0.966667
144	0.6	0.966667
145	0.6	1
146	0.65	1
147	0.7	1
148	0.75	1
149	0.8	1
150	0.85	1
151	0.9	1
152	0.95	1
153	1	1
154	0	0
155	0	0.0333333
156	0	0.0666667
157	0	0.1
158	0	0.133333
159	0	0.166667
160	0	0.2
161	0	0.233333
162	0	0.266667
163	0	0.3
164	0	0.333333
165	0	0.366667
166	0	0.4
167	0	0.433333
168	0	0.466667
169	0	0.5
170	0	0.533333
171	0	0.566667
172	0	0.6
173	0	0.633333
174	0.05	0.633333
175	0.05	0.666667
176	0.1	0.666667
177	0.1	0.7
178	0.1	0.733333
179	0.1	0.766667
180	0.1	0.8
181	0.15	0.8
182	0.2	0.8
183	0.25	0.8
184	0.25	0.833333
185	0.3	0.833333
186	0.35	0.833333
187	0.35	0.866667
188	0.4	0.866667
189	0.4	0.9
190	0.45	0.9
191	0.45	0.933333
192	0.45	0.966667
193	0.5	0.966667
194	0.55	0.966667
195	0.6	0.966667
196	0.65	0.966667
197	0.7	0.966667
198	0.75	0.966667
199	0.8	0.966667
200	0.8	1
201	0.85	1
202	0.9	1
203	0.95	1
204	1	1
205	0	0
206	0	0.0333333
207	0	0.0666667
208	0	0.1
209	0	0.133333
210	0	0.166667
211	0	0.2
212	0.05	0.2
213	0.05	0.233333
214	0.05	0.266667
215	0.05	0.3
216	0.05	0.333333
217	0.05	0.366667
218	0.05	0.4
219	0.05	0.433333
220	0.05	0.466667
221	0.05	0.5
222	0.05	0.533333
223	0.05	0.566667
224	0.05	0.6
225	0.05	0.633333
226	0.1	0.633333
227	0.1	0.666667
228	0.1	0.7
229	0.1	0.733333
230	0.1	0.766667
231	0.1	0.8
232	0.15	0.8
233	0.15	0.833333
234	0.2	0.833333
235	0.2	0.866667
236	0.2	0.9
237	0.25	0.9
238	0.25	0.933333
239	0.3	0.933333
240	0.3	0.966667
241	0.3	1
242	0.35	1
243	0.4	1
244	0.45	1
245	0.5	1
246	0.55	1
247	0.6	1
248	0.65	1
249	0.7	1
250	0.75	1
251	0.8	1
252	0.85	1
253	0.9	1
254	0.95	1
255	1	1
256	0	0
257	0	0.0333333
258	0	0.0666667
259	0	0.1
260	0.05	0.1
261	0.05	0.133333
262	0.05	0.166667
263	0.05	0.2
264	0.05	0.233333
265	0.05	0.266667
266	0.05	0.3
267	0.05	0.333333
268	0.05	0.366667
269	0.05	0.4
270	0.05	0.433333
271	0.05	0.466667
272	0.05	0.5
273	0.05	0.533333
274	0.05	0.566667
275	0.05	0.6
276	0.05	0.633333
277	0.05	0.666667
278	0.05	0.7
279	0.05	0.733333
280	0.1	0.733333
281	0.1	0.766667
282	0.1	0.8
283	0.15	0.8
284	0.2	0.8
285	0.2	0.833333
286	0.25	0.833333
287	0.3	0.833333
288	0.3	0.866667
289	0.35	0.866667
290	0.4	0.866667
291	0.4	0.9
292	0.45	0.9
293	0.45	0.933333
294	0.5	0.933333
295	0.5	0.966667
296	0.55	0.966667
297	0.6	0.966667
298	0.65	0.966667
299	0.65	1
300	0.7	1
301	0.75	1
302	0.8	1
303	0.85	1
304	0.9	1
305	0.95	1
306	1	1
307	0	0
308	0	0.0333333
309	0	0.0666667
310	0	0.1
311	0	0.133333
312	0	0.166667
313	0	0.2
314	0	0.233333
315	0	0.266667
316	0	0.3
317	0	0.333333
318	0	0.366667
319	0	0.4
320	0	0.433333
321	0	0.466667
322	0	0.5
323	0	0.533333
324	0	0.566667
325	0	0.6
326	0.05	0.6
327	0.05	0.633333
328	0.05	0.666667
329	0.05	0.7
330	0.05	0.733333
331	0.1	0.733333
332	0.1	0.766667
333	0.15	0.766667
334	0.15	0.8
335	0.15	0.833333
336	0.2	0.833333
337	0.25	0.833333
338	0.3	0.833333
339	0.3	0.866667
340	0.35	0.866667
341	0.35	0.9
342	0.35	0.933333
343	0.35	0.966667
344	0.4	0.966667
345	0.45	0.966667
346	0.5	0.966667
347	0.55	0.966667
348	0.6	0.966667
349	0.65	0.966667
350	0.7	0.966667
351	0.75	0.966667
352	0.8	0.966667
353	0.85	0.966667
354	0.9	0.966667
355	0.95	0.966667
356	0.95	1
357	1	1
358	0	0
359	0	0.0333333
360	0	0.0666667
361	0	0.1
362	0	0.133333
363	0	0.166667
364	0	0.2
365	0	0.233333
366	0.05	0.233333
367	0.05	0.266667
368	0.05	0.3
369	0.05	0.333333
370	0.05	0.366667
371	0.05	0.4
372	0.05	0.433333
373	0.05	0.466667
374	0.05	0.5
375	0.05	0.533333
376	0.05	0.566667
377	0.05	0.6
378	0.05	0.633333
379	0.05	0.666667
380	0.05	0.7
381	0.05	0.733333
382	0.05	0.766667
383	0.05	0.8
384	0.05	0.833333
385	0.05	0.866667
386	0.1	0.866667
387	0.15	0.866667
388	0.2	0.866667
389	0.2	0.9
390	0.2	0.933333
391	0.25	0.933333
392	0.25	0.966667
393	0.3	0.966667
394	0.3	1
395	0.35	1
396	0.4	1
397	0.45	1
398	0.5	1
399	0.55	1
400	0.6	1
401	0.65	1
402	0.7	1
403	0.75	1
404	0.8	1
405	0.85	1
406	0.9	1
407	0.95	1
408	1	1
409	0	0
410	0	0.0333333
411	0	0.0666667
412	0	0.1
413	0	0.133333
414	0	0.166667
415	0	0.2
416	0	0.233333
417	0	0.266667
418	0	0.3
419	0	0.333333
420	0	0.366667
421	0	0.4
422	0	0.433333
423	0	0.466667
424	0	0.5
425	0	0.533333
426	0	0.566667
427	0	0.6
428	0	0.633333
429	0	0.666667
430	0	0.7
431	0	0.733333
432	0	0.766667
433	0.05	0.766667
434	0.05	0.8
435	0.05	0.833333
436	0.1	0.833333
437	0.1	0.866667
438	0.1	0.9
439	0.1	0.933333
440	0.1	0.966667
441	0.15	0.966667
442	0.2	0.966667
443	0.2	1
444	0.25	1
445	0.3	1
446	0.35	1
447	0.4	1
448	0.45	1
449	0.5	1
450	0.55	1
451	0.6	1
452	0.65	1
453	0.7	1
454	0.75	1
455	0.8	1
456	0.85	1
457	0.9	1
458	0.95	1
459	1	1
460	0	0
461	0	0.0333333
462	0	0.0666667
463	0	0.1
464	0	0.133333
465	0	0.166667
466	0	0.2
467	0	0.233333
468	0	0.266667
469	0	0.3
470	0	0.333333
471	0	0.366667
472	0	0.4
473	0	0.433333
474	0	0.466667
475	0	0.5
476	0	0.533333
477	0	0.566667
478	0	0.6
479	0	0.633333
480	0	0.666667
481	0	0.7
482	0	0.733333
483	0	0.766667
484	0.05	0.766667
485	0.05	0.8
486	0.1	0.8
487	0.15	0.8
488	0.2	0.8
489	0.25	0.8
490	0.3	0.8
491	0.35	0.8
492	0.35	0.833333
493	0.35	0.866667
494	0.35	0.9
495	0.35	0.933333
496	0.35	0.966667
497	0.4	0.966667
498	0.45	0.966667
499	0.5	0.966667
500	0.55	0.966667
501	0.6	0.966667
502	0.65	0.966667
503	0.7	0.966667
504	0.75	0.966667
505	0.75	1
506	0.8	1
507	0.85	1
508	0.9	1
509	0.95	1
510	1	1
511	0	0
512	0	0.0333333
513	0	0.0666667
514	0	0.1
515	0	0.133333
516	0	0.166667
517	0	0.2
518	0	0.233333
519	0	0.266667
520	0	0.3
521	0	0.333333
522	0	0.366667
523	0	0.4
524	0	0.433333
525	0	0.466667
526	0	0.5
527	0	0.533333
528	0.05	0.533333
529	0.1	0.533333
530	0.1	0.566667
531	0.1	0.6
532	0.1	0.633333
533	0.15	0.633333
534	0.15	0.666667
535	0.15	0.7
536	0.2	0.7
537	0.25	0.7
538	0.25	0.733333
539	0.25	0.766667
540	0.3	0.766667
541	0.3	0.8
542	0.3	0.833333
543	0.3	0.866667
544	0.3	0.9
545	0.35	0.9
546	0.4	0.9
547	0.45	0.9
548	0.45	0.933333
549	0.45	0.966667
550	0.5	0.966667
551	0.55	0.966667
552	0.55	1
553	0.6	1
554	0.65	1
555	0.7	1
556	0.75	1
557	0.8	1
558	0.85	1
559	0.9	1
560	0.95	1
561	1	1
562	0	0
563	0	0.0333333
564	0	0.0666667
565	0	0.1
566	0	0.133333
567	0.05	0.133333
568	0.05	0.166667
569	0.05	0.2
570	0.05	0.233333
571	0.05	0.266667
572	0.05	0.3
573	0.05	0.333333
574	0.05	0.366667
575	0.05	0.4
576	0.05	0.433333
577	0.05	0.466667
578	0.05	0.5
579	0.05	0.533333
580	0.05	0.566667
581	0.05	0.6
582	0.05	0.633333
583	0.05	0.666667
584	0.05	0.7
585	0.05	0.733333
586	0.05	0.766667
587	0.05	0.8
588	0.05	0.833333
589	0.05	0.866667
590	0.05	0.9
591	0.1	0.9
592	0.1	0.933333
593	0.15	0.933333
594	0.2	0.933333
595	0.2	0.966667
596	0.25	0.966667
597	0.3	0.966667
598	0.35	0.966667
599	0.4	0.966667
600	0.45	0.966667
601	0.5	0.966667
602	0.55	0.966667
603	0.6	0.966667
604	0.65	0.966667
605	0.7	0.966667
606	0.75	0.966667
607	0.75	1
608	0.8	1
609	0.85	1
610	0.9	1
611	0.95	1
612	1	1
613	0	0
614	0	0.0333333
615	0	0.0666667
616	0	0.1
617	0	0.133333
618	0	0.166667
619	0	0.2
620	0	0.233333
621	0	0.266667
622	0	0.3
623	0	0.333333
624	0	0.366667
625	0	0.4
626	0	0.433333
627	0	0.466667
628	0	0.5
629	0	0.533333
630	0	0.566667
631	0	0.6
632	0	0.633333
633	0	0.666667
634	0.05	0.666667
635	0.05	0.7
636	0.05	0.733333
637	0.05	0.766667
638	0.1	0.766667
639	0.1	0.8
640	0.15	0.8
641	0.15	0.833333
642	0.2	0.833333
643	0.25	0.833333
644	0.3	0.833333
645	0.3	0.866667
646	0.3	0.9
647	0.3	0.933333
648	0.35	0.933333
649	0.4	0.933333
650	0.4	0.966667
651	0.45	0.966667
652	0.5	0.966667
653	0.55	0.966667
654	0.6	0.966667
655	0.65	0.966667
656	0.7	0.966667
657	0.75	0.966667
658	0.8	0.966667
659	0.85	0.966667
660	0.9	0.966667
661	0.9	1
662	0.95	1
663	1	1
664	0	0
665	0	0.0333333
666	0	0.0666667
667	0	0.1
668	0	0.133333
669	0	0.166667
670	0	0.2
671	0	0.233333
672	0	0.266667
673	0	0.3
674	0	0.333333
675	0	0.366667
676	0	0.4
677	0	0.433333
678	0	0.466667
679	0	0.5
680	0	0.533333
681	0	0.566667
682	0	0.6
683	0	0.633333
684	0	0.666667
685	0	0.7
686	0.05	0.7
687	0.05	0.733333
688	0.1	0.733333
689	0.15	0.733333
690	0.15	0.766667
691	0.15	0.8
692	0.15	0.833333
693	0.15	0.866667
694	0.15	0.9
695	0.15	0.933333
696	0.2	0.933333
697	0.25	0.933333
698	0.25	0.966667
699	0.3	0.966667
700	0.35	0.966667
701	0.4	0.966667
702	0.45	0.966667
703	0.5	0.966667
704	0.55	0.966667
705	0.6	0.966667
706	0.65	0.966667
707	0.7	0.966667
708	0.75	0.966667
709	0.8	0.966667
710	0.8	1
711	0.85	1
712	0.9	1
713	0.95	1
714	1	1
715	0	0
716	0	0.0333333
717	0	0.0666667
718	0	0.1
719	0	0.133333
720	0	0.166667
721	0	0.2
722	0	0.233333
723	0	0.266667
724	0	0.3
725	0	0.333333
726	0	0.366667
727	0	0.4
728	0	0.433333
729	0	0.466667
730	0.05	0.466667
731	0.1	0.466667
732	0.1	0.5
733	0.1	0.533333
734	0.1	0.566667
735	0.1	0.6
736	0.1	0.633333
737	0.1	0.666667
738	0.1	0.7
739	0.1	0.733333
740	0.1	0.766667
741	0.1	0.8
742	0.1	0.833333
743	0.15	0.833333
744	0.2	0.833333
745	0.2	0.866667
746	0.2	0.9
747	0.2	0.933333
748	0.25	0.933333
749	0.3	0.933333
750	0.35	0.933333
751	0.4	0.933333
752	0.4	0.966667
753	0.45	0.966667
754	0.5	0.966667
755	0.55	0.966667
756	0.6	0.966667
757	0.65	0.966667
758	0.7	0.966667
759	0.7	1
760	0.75	1
761	0.8	1
762	0.85	1
763	0.9	1
764	0.95	1
765	1	1
766	0	0
767	0	0.0333333
768	0	0.0666667
769	0	0.1
770	0	0.133333
771	0	0.166667
772	0	0.2
773	0	0.233333
774	0	0.266667
775	0	0.3
776	0	0.333333
777	0	0.366667
778	0.05	0.366667
779	0.05	0.4
780	0.05	0.433333
781	0.05	0.466667
782	0.05	0.5
783	0.05	0.533333
784	0.05	0.566667
785	0.05	0.6
786	0.05	0.633333
787	0.05	0.666667
788	0.05	0.7
789	0.1	0.7
790	0.1	0.733333
791	0.15	0.733333
792	0.15	0.766667
793	0.15	0.8
794	0.15	0.833333
795	0.15	0.866667
796	0.15	0.9
797	0.2	0.9
798	0.25	0.9
799	0.3	0.9
800	0.3	0.933333
801	0.35	0.933333
802	0.4	0.933333
803	0.45	0.933333
804	0.5	0.933333
805	0.55	0.933333
806	0.6	0.933333
807	0.65	0.933333
808	0.7	0.933333
809	0.75	0.933333
810	0.8	0.933333
811	0.85	0.933333
812	0.9	0.933333
813	0.9	0.966667
814	0.95	0.966667
815	0.95	1
816	1	1
817	0	0
818	0	0.0333333
819	0	0.0666667
820	0	0.1
821	0	0.133333
822	0	0.166667
823	0	0.2
824	0	0.233333
825	0	0.266667
826	0	0.3
827	0	0.333333
828	0.05	0.333333
829	0.05	0.4
830	0.05	0.433333
831	0.05	0.466667
832	0.05	0.5
833	0.05	0.533333
834	0.05	0.566667
835	0.05	0.6
836	0.05	0.633333
837	0.05	0.666667
838	0.05	0.7
839	0.05	0.733333
840	0.1	0.733333
841	0.15	0.733333
842	0.2	0.733333
843	0.2	0.766667
844	0.25	0.766667
845	0.3	0.766667
846	0.3	0.8
847	0.35	0.8
848	0.35	0.833333
849	0.35	0.866667
850	0.4	0.866667
851	0.45	0.866667
852	0.45	0.9
853	0.5	0.9
854	0.5	0.933333
855	0.5	0.966667
856	0.55	0.966667
857	0.6	0.966667
858	0.65	0.966667
859	0.7	0.966667
860	0.75	0.966667
861	0.75	1
862	0.8	1
863	0.85	1
864	0.9	1
865	0.95	1
866	1	1
867	0	0
868	0	0.0333333
869	0	0.0666667
870	0	0.1
871	0	0.133333
872	0	0.166667
873	0	0.2
874	0	0.233333
875	0	0.266667
876	0	0.3
877	0	0.333333
878	0	0.366667
879	0	0.4
880	0	0.433333
881	0.05	0.433333
882	0.05	0.466667
883	0.05	0.5
884	0.05	0.533333
885	0.05	0.566667
886	0.05	0.6
887	0.05	0.633333
888	0.05	0.666667
889	0.05	0.7
890	0.1	0.7
891	0.1	0.733333
892	0.15	0.733333
893	0.15	0.766667
894	0.15	0.8
895	0.15	0.833333
896	0.15	0.866667
897	0.15	0.9
898	0.15	0.933333
899	0.2	0.933333
900	0.2	0.966667
901	0.25	0.966667
902	0.3	0.966667
903	0.35	0.966667
904	0.4	0.966667
905	0.45	0.966667
906	0.5	0.966667
907	0.55	0.966667
908	0.6	0.966667
909	0.65	0.966667
910	0.65	1
911	0.7	1
912	0.75	1
913	0.8	1
914	0.85	1
915	0.9	1
916	0.95	1
917	1	1
918	0	0
919	0	0.0333333
920	0	0.0666667
921	0	0.1
922	0	0.133333
923	0	0.166667
924	0	0.2
925	0	0.233333
926	0	0.266667
927	0	0.3
928	0	0.333333
929	0	0.366667
930	0	0.4
931	0	0.433333
932	0	0.466667
933	0	0.5
934	0	0.533333
935	0.05	0.533333
936	0.05	0.566667
937	0.1	0.566667
938	0.1	0.6
939	0.15	0.6
940	0.2	0.6
941	0.2	0.633333
942	0.2	0.666667
943	0.2	0.7
944	0.25	0.7
945	0.25	0.733333
946	0.25	0.766667
947	0.25	0.8
948	0.25	0.833333
949	0.3	0.833333
950	0.35	0.833333
951	0.35	0.866667
952	0.35	0.9
953	0.35	0.933333
954	0.35	0.966667
955	0.4	0.966667
956	0.45	0.966667
957	0.5	0.966667
958	0.55	0.966667
959	0.6	0.966667
960	0.65	0.966667
961	0.7	0.966667
962	0.75	0.966667
963	0.8	0.966667
964	0.85	0.966667
965	0.9	0.966667
966	0.95	0.966667
967	0.95	1
968	1	1
969	0	0
970	0	0.0333333
971	0	0.0666667
972	0	0.1
973	0	0.133333
974	0	0.166667
975	0	0.2
976	0	0.233333
977	0	0.266667
978	0	0.3
979	0	0.333333
980	0	0.366667
981	0	0.4
982	0.05	0.4
983	0.05	0.433333
984	0.1	0.433333
985	0.1	0.466667
986	0.15	0.466667
987	0.15	0.5
988	0.15	0.533333
989	0.15	0.566667
990	0.15	0.6
991	0.15	0.633333
992	0.15	0.666667
993	0.15	0.7
994	0.15	0.733333
995	0.15	0.766667
996	0.15	0.8
997	0.15	0.833333
998	0.2	0.833333
999	0.2	0.866667
1000	0.25	0.866667
1001	0.25	0.9
1002	0.25	0.933333
1003	0.25	0.966667
1004	0.3	0.966667
1005	0.35	0.966667
1006	0.35	1
1007	0.4	1
1008	0.45	1
1009	0.5	1
1010	0.55	1
1011	0.6	1
1012	0.65	1
1013	0.7	1
1014	0.75	1
1015	0.8	1
1016	0.85	1
1017	0.9	1
1018	0.95	1
1019	1	1
1020	0	0
1021	0	0.0333333
1022	0	0.0666667
1023	0	0.1
1024	0	0.133333
1025	0	0.166667
1026	0	0.2
1027	0	0.233333
1028	0	0.266667
1029	0	0.3
1030	0	0.333333
1031	0	0.366667
1032	0	0.4
1033	0	0.433333
1034	0	0.466667
1035	0	0.5
1036	0	0.533333
1037	0	0.566667
1038	0	0.6
1039	0	0.633333
1040	0	0.666667
1041	0.05	0.666667
1042	0.05	0.7
1043	0.05	0.733333
1044	0.1	0.733333
1045	0.1	0.766667
1046	0.1	0.8
1047	0.1	0.833333
1048	0.15	0.833333
1049	0.15	0.866667
1050	0.15	0.9
1051	0.15	0.933333
1052	0.2	0.933333
1053	0.25	0.933333
1054	0.3	0.933333
1055	0.3	0.966667
1056	0.35	0.966667
1057	0.4	0.966667
1058	0.45	0.966667
1059	0.45	1
1060	0.5	1
1061	0.55	1
1062	0.6	1
1063	0.65	1
1064	0.7	1
1065	0.75	1
1066	0.8	1
1067	0.85	1
1068	0.9	1
1069	0.95	1
1070	1	1
1071	0	0
1072	0	0.0333333
1073	0	0.0666667
1074	0	0.1
1075	0	0.133333
1076	0	0.166667
1077	0	0.2
1078	0	0.233333
1079	0	0.266667
1080	0	0.3
1081	0	0.333333
1082	0	0.366667
1083	0	0.4
1084	0	0.433333
1085	0	0.466667
1086	0	0.5
1087	0	0.533333
1088	0	0.566667
1089	0	0.6
1090	0	0.633333
1091	0	0.666667
1092	0	0.7
1093	0	0.733333
1094	0	0.766667
1095	0	0.8
1096	0	0.833333
1097	0.05	0.833333
1098	0.05	0.866667
1099	0.1	0.866667
1100	0.15	0.866667
1101	0.2	0.866667
1102	0.25	0.866667
1103	0.25	0.9
1104	0.25	0.933333
1105	0.25	0.966667
1106	0.3	0.966667
1107	0.35	0.966667
1108	0.35	1
1109	0.4	1
1110	0.45	1
1111	0.5	1
1112	0.55	1
1113	0.6	1
1114	0.65	1
1115	0.7	1
1116	0.75	1
1117	0.8	1
1118	0.85	1
1119	0.9	1
1120	0.95	1
1121	1	1
1122	0	0
1123	0	0.0333333
1124	0	0.0666667
1125	0	0.1
1126	0	0.133333
1127	0	0.166667
1128	0	0.2
1129	0	0.233333
1130	0	0.266667
1131	0	0.3
1132	0	0.333333
1133	0	0.366667
1134	0	0.4
1135	0	0.433333
1136	0	0.466667
1137	0	0.5
1138	0	0.533333
1139	0	0.566667
1140	0	0.6
1141	0	0.633333
1142	0	0.666667
1143	0	0.7
1144	0.05	0.7
1145	0.05	0.733333
1146	0.05	0.766667
1147	0.1	0.766667
1148	0.1	0.8
1149	0.1	0.833333
1150	0.1	0.866667
1151	0.1	0.9
1152	0.15	0.9
1153	0.15	0.933333
1154	0.2	0.933333
1155	0.25	0.933333
1156	0.25	0.966667
1157	0.3	0.966667
1158	0.35	0.966667
1159	0.35	1
1160	0.4	1
1161	0.45	1
1162	0.5	1
1163	0.55	1
1164	0.6	1
1165	0.65	1
1166	0.7	1
1167	0.75	1
1168	0.8	1
1169	0.85	1
1170	0.9	1
1171	0.95	1
1172	1	1
1173	0	0
1174	0	0.0333333
1175	0	0.0666667
1176	0	0.1
1177	0	0.133333
1178	0	0.166667
1179	0	0.2
1180	0	0.233333
1181	0	0.266667
1182	0	0.3
1183	0	0.333333
1184	0	0.366667
1185	0	0.4
1186	0	0.433333
1187	0	0.466667
1188	0	0.5
1189	0	0.533333
1190	0	0.566667
1191	0	0.6
1192	0	0.633333
1193	0	0.666667
1194	0	0.7
1195	0	0.733333
1196	0	0.766667
1197	0.05	0.766667
1198	0.05	0.8
1199	0.05	0.833333
1200	0.05	0.866667
1201	0.1	0.866667
1202	0.15	0.866667
1203	0.15	0.9
1204	0.15	0.933333
1205	0.2	0.933333
1206	0.2	0.966667
1207	0.25	0.966667
1208	0.3	0.966667
1209	0.35	0.966667
1210	0.35	1
1211	0.4	1
1212	0.45	1
1213	0.5	1
1214	0.55	1
1215	0.6	1
1216	0.65	1
1217	0.7	1
1218	0.75	1
1219	0.8	1
1220	0.85	1
1221	0.9	1
1222	0.95	1
1223	1	1
1224	0	0
1225	0	0.0333333
1226	0	0.0666667
1227	0	0.1
1228	0	0.133333
1229	0	0.166667
1230	0	0.2
1231	0	0.233333
1232	0	0.266667
1233	0	0.3
1234	0	0.333333
1235	0	0.366667
1236	0.05	0.366667
1237	0.05	0.4
1238	0.05	0.433333
1239	0.05	0.466667
1240	0.05	0.5
1241	0.05	0.533333
1242	0.1	0.533333
1243	0.1	0.566667
1244	0.1	0.6
1245	0.1	0.633333
1246	0.1	0.666667
1247	0.1	0.7
1248	0.1	0.733333
1249	0.1	0.766667
1250	0.15	0.766667
1251	0.15	0.8
1252	0.2	0.8
1253	0.25	0.8
1254	0.25	0.833333
1255	0.3	0.833333
1256	0.35	0.833333
1257	0.4	0.833333
1258	0.4	0.866667
1259	0.4	0.9
1260	0.4	0.933333
1261	0.4	0.966667
1262	0.45	0.966667
1263	0.45	1
1264	0.5	1
1265	0.55	1
1266	0.6	1
1267	0.65	1
1268	0.7	1
1269	0.75	1
1270	0.8	1
1271	0.85	1
1272	0.9	1
1273	0.95	1
1274	1	1
1275	0	0
1276	0	0.0333333
1277	0	0.0666667
1278	0	0.1
1279	0	0.133333
1280	0	0.166667
1281	0	0.2
1282	0	0.233333
1283	0	0.266667
1284	0	0.3
1285	0	0.333333
1286	0	0.366667
1287	0	0.4
1288	0	0.433333
1289	0	0.466667
1290	0	0.5
1291	0	0.533333
1292	0	0.566667
1293	0.05	0.566667
1294	0.05	0.6
1295	0.05	0.633333
1296	0.05	0.666667
1297	0.05	0.7
1298	0.05	0.733333
1299	0.05	0.766667
1300	0.05	0.8
1301	0.05	0.833333
1302	0.05	0.866667
1303	0.1	0.866667
1304	0.15	0.866667
1305	0.15	0.9
1306	0.2	0.9
1307	0.25	0.9
1308	0.25	0.933333
1309	0.3	0.933333
1310	0.35	0.933333
1311	0.35	0.966667
1312	0.4	0.966667
1313	0.45	0.966667
1314	0.5	0.966667
1315	0.55	0.966667
1316	0.6	0.966667
1317	0.65	0.966667
1318	0.7	0.966667
1319	0.75	0.966667
1320	0.8	0.966667
1321	0.85	0.966667
1322	0.85	1
1323	0.9	1
1324	0.95	1
1325	1	1
1326	0	0
1327	0	0.0333333
1328	0	0.0666667
1329	0	0.1
1330	0	0.133333
1331	0	0.166667
1332	0	0.2
1333	0	0.233333
1334	0	0.266667
1335	0	0.3
1336	0	0.333333
1337	0	0.366667
1338	0	0.4
1339	0	0.433333
1340	0	0.466667
1341	0	0.5
1342	0	0.533333
1343	0	0.566667
1344	0	0.6
1345	0	0.633333
1346	0	0.666667
1347	0	0.7
1348	0	0.733333
1349	0	0.766667
1350	0	0.8
1351	0	0.833333
1352	0	0.866667
1353	0.05	0.866667
1354	0.05	0.9
1355	0.1	0.9
1356	0.15	0.9
1357	0.2	0.9
1358	0.25	0.9
1359	0.3	0.9
1360	0.3	0.933333
1361	0.35	0.933333
1362	0.4	0.933333
1363	0.45	0.933333
1364	0.45	0.966667
1365	0.5	0.966667
1366	0.55	0.966667
1367	0.6	0.966667
1368	0.65	0.966667
1369	0.7	0.966667
1370	0.75	0.966667
1371	0.75	1
1372	0.8	1
1373	0.85	1
1374	0.9	1
1375	0.95	1
1376	1	1
1377	0	0
1378	0	0.0333333
1379	0	0.0666667
1380	0	0.1
1381	0	0.133333
1382	0	0.166667
1383	0	0.2
1384	0	0.233333
1385	0	0.266667
1386	0	0.3
1387	0	0.333333
1388	0	0.366667
1389	0	0.4
1390	0	0.433333
1391	0	0.466667
1392	0	0.5
1393	0	0.533333
1394	0	0.566667
1395	0.05	0.566667
1396	0.05	0.6
1397	0.05	0.633333
1398	0.05	0.666667
1399	0.05	0.7
1400	0.05	0.733333
1401	0.05	0.766667
1402	0.05	0.8
1403	0.1	0.8
1404	0.1	0.833333
1405	0.1	0.866667
1406	0.1	0.9
1407	0.15	0.9
1408	0.2	0.9
1409	0.2	0.933333
1410	0.25	0.933333
1411	0.25	0.966667
1412	0.3	0.966667
1413	0.35	0.966667
1414	0.4	0.966667
1415	0.45	0.966667
1416	0.5	0.966667
1417	0.55	0.966667
1418	0.6	0.966667
1419	0.65	0.966667
1420	0.7	0.966667
1421	0.75	0.966667
1422	0.75	1
1423	0.8	1
1424	0.85	1
1425	0.9	1
1426	0.95	1
1427	1	1
1428	0	0
1429	0	0.0333333
1430	0	0.0666667
1431	0	0.1
1432	0	0.133333
1433	0	0.166667
1434	0	0.2
1435	0	0.233333
1436	0	0.266667
1437	0	0.3
1438	0	0.333333
1439	0	0.366667
1440	0	0.4
1441	0	0.433333
1442	0	0.466667
1443	0	0.5
1444	0	0.533333
1445	0	0.566667
1446	0.05	0.566667
1447	0.1	0.566667
1448	0.1	0.6
1449	0.1	0.633333
1450	0.15	0.633333
1451	0.15	0.666667
1452	0.2	0.666667
1453	0.2	0.7
1454	0.2	0.733333
1455	0.25	0.733333
1456	0.25	0.766667
1457	0.25	0.8
1458	0.25	0.833333
1459	0.25	0.866667
1460	0.3	0.866667
1461	0.3	0.9
1462	0.3	0.933333
1463	0.35	0.933333
1464	0.4	0.933333
1465	0.45	0.933333
1466	0.5	0.933333
1467	0.55	0.933333
1468	0.55	0.966667
1469	0.55	1
1470	0.6	1
1471	0.65	1
1472	0.7	1
1473	0.75	1
1474	0.8	1
1475	0.85	1
1476	0.9	1
1477	0.95	1
1478	1	1
1479	0	0
1480	0	0.0333333
1481	0	0.0666667
1482	0	0.1
1483	0	0.133333
1484	0	0.166667
1485	0	0.2
1486	0	0.233333
1487	0	0.266667
1488	0	0.3
1489	0.05	0.3
1490	0.05	0.333333
1491	0.05	0.366667
1492	0.05	0.4
1493	0.05	0.433333
1494	0.05	0.466667
1495	0.05	0.5
1496	0.05	0.533333
1497	0.05	0.566667
1498	0.05	0.6
1499	0.05	0.633333
1500	0.05	0.666667
1501	0.05	0.7
1502	0.1	0.7
1503	0.1	0.733333
1504	0.1	0.766667
1505	0.1	0.8
1506	0.1	0.833333
1507	0.1	0.866667
1508	0.15	0.866667
1509	0.2	0.866667
1510	0.25	0.866667
1511	0.25	0.9
1512	0.3	0.9
1513	0.35	0.9
1514	0.4	0.9
1515	0.4	0.933333
1516	0.45	0.933333
1517	0.5	0.933333
1518	0.55	0.933333
1519	0.55	0.966667
1520	0.55	1
1521	0.6	1
1522	0.65	1
1523	0.7	1
1524	0.75	1
1525	0.8	1
1526	0.85	1
1527	0.9	1
1528	0.95	1
1529	1	1
1530	0	0
1531	0	0.0333333
1532	0	0.0666667
1533	0	0.1
1534	0	0.133333
1535	0	0.166667
1536	0	0.2
1537	0	0.233333
1538	0	0.266667
1539	0	0.3
1540	0	0.333333
1541	0	0.366667
1542	0	0.4
1543	0	0.433333
1544	0	0.466667
1545	0	0.5
1546	0	0.533333
1547	0.05	0.533333
1548	0.05	0.566667
1549	0.05	0.6
1550	0.05	0.633333
1551	0.05	0.666667
1552	0.05	0.7
1553	0.05	0.733333
1554	0.05	0.766667
1555	0.05	0.8
1556	0.1	0.8
1557	0.1	0.833333
1558	0.1	0.866667
1559	0.15	0.866667
1560	0.15	0.9
1561	0.2	0.9
1562	0.2	0.933333
1563	0.25	0.933333
1564	0.3	0.933333
1565	0.35	0.933333
1566	0.4	0.933333
1567	0.4	0.966667
1568	0.45	0.966667
1569	0.5	0.966667
1570	0.55	0.966667
1571	0.6	0.966667
1572	0.65	0.966667
1573	0.7	0.966667
1574	0.75	0.966667
1575	0.8	0.966667
1576	0.85	0.966667
1577	0.9	0.966667
1578	0.95	0.966667
1579	1	0.966667
1580	1	1
1581	0	0
1582	0	0.0333333
1583	0	0.0666667
1584	0	0.1
1585	0	0.133333
1586	0	0.166667
1587	0	0.2
1588	0	0.233333
1589	0	0.266667
1590	0	0.3
1591	0	0.333333
1592	0	0.366667
1593	0	0.4
1594	0.05	0.4
1595	0.05	0.433333
1596	0.05	0.466667
1597	0.05	0.5
1598	0.05	0.533333
1599	0.05	0.566667
1600	0.05	0.6
1601	0.05	0.633333
1602	0.1	0.633333
1603	0.1	0.666667
1604	0.1	0.7
1605	0.1	0.733333
1606	0.1	0.766667
1607	0.1	0.8
1608	0.15	0.8
1609	0.15	0.833333
1610	0.15	0.866667
1611	0.15	0.9
1612	0.2	0.9
1613	0.2	0.933333
1614	0.2	0.966667
1615	0.25	0.966667
1616	0.3	0.966667
1617	0.35	0.966667
1618	0.35	1
1619	0.4	1
1620	0.45	1
1621	0.5	1
1622	0.55	1
1623	0.6	1
1624	0.65	1
1625	0.7	1
1626	0.75	1
1627	0.8	1
1628	0.85	1
1629	0.9	1
1630	0.95	1
1631	1	1
1632	0	0
1633	0	0.0333333
1634	0	0.0666667
1635	0	0.1
1636	0	0.133333
1637	0	0.166667
1638	0	0.2
1639	0	0.233333
1640	0	0.266667
1641	0	0.3
1642	0	0.333333
1643	0	0.366667
1644	0	0.4
1645	0	0.433333
1646	0	0.466667
1647	0	0.5
1648	0	0.533333
1649	0	0.566667
1650	0	0.6
1651	0	0.633333
1652	0	0.666667
1653	0.05	0.666667
1654	0.05	0.7
1655	0.05	0.733333
1656	0.05	0.766667
1657	0.05	0.8
1658	0.05	0.833333
1659	0.1	0.833333
1660	0.1	0.866667
1661	0.15	0.866667
1662	0.15	0.9
1663	0.2	0.9
1664	0.25	0.9
1665	0.25	0.933333
1666	0.3	0.933333
1667	0.35	0.933333
1668	0.4	0.933333
1669	0.45	0.933333
1670	0.5	0.933333
1671	0.55	0.933333
1672	0.6	0.933333
1673	0.65	0.933333
1674	0.65	0.966667
1675	0.7	0.966667
1676	0.75	0.966667
1677	0.8	0.966667
1678	0.85	0.966667
1679	0.85	1
1680	0.9	1
1681	0.95	1
1682	1	1
1683	0	0
1684	0	0.0333333
1685	0	0.0666667
1686	0	0.1
1687	0	0.133333
1688	0	0.166667
1689	0	0.2
1690	0	0.233333
1691	0	0.266667
1692	0.05	0.266667
1693	0.05	0.3
1694	0.05	0.333333
1695	0.05	0.366667
1696	0.05	0.4
1697	0.05	0.433333
1698	0.05	0.466667
1699	0.05	0.5
1700	0.05	0.533333
1701	0.05	0.566667
1702	0.05	0.6
1703	0.05	0.633333
1704	0.05	0.666667
1705	0.05	0.7
1706	0.05	0.733333
1707	0.05	0.766667
1708	0.05	0.8
1709	0.05	0.833333
1710	0.1	0.833333
1711	0.15	0.833333
1712	0.15	0.866667
1713	0.2	0.866667
1714	0.2	0.9
1715	0.2	0.933333
1716	0.25	0.933333
1717	0.3	0.933333
1718	0.35	0.933333
1719	0.35	0.966667
1720	0.4	0.966667
1721	0.4	1
1722	0.45	1
1723	0.5	1
1724	0.55	1
1725	0.6	1
1726	0.65	1
1727	0.7	1
1728	0.75	1
1729	0.8	1
1730	0.85	1
1731	0.9	1
1732	0.95	1
1733	1	1
1734	0	0
1735	0	0.0333333
1736	0	0.0666667
1737	0	0.1
1738	0	0.133333
1739	0	0.166667
1740	0	0.2
1741	0	0.233333
1742	0	0.266667
1743	0	0.3
1744	0	0.333333
1745	0	0.366667
1746	0	0.4
1747	0	0.433333
1748	0	0.466667
1749	0.05	0.466667
1750	0.05	0.5
1751	0.05	0.533333
1752	0.05	0.566667
1753	0.1	0.566667
1754	0.1	0.6
1755	0.1	0.633333
1756	0.15	0.633333
1757	0.15	0.666667
1758	0.15	0.7
1759	0.15	0.733333
1760	0.15	0.766667
1761	0.15	0.8
1762	0.15	0.833333
1763	0.15	0.866667
1764	0.2	0.866667
1765	0.25	0.866667
1766	0.25	0.9
1767	0.25	0.933333
1768	0.3	0.933333
1769	0.3	0.966667
1770	0.35	0.966667
1771	0.4	0.966667
1772	0.45	0.966667
1773	0.5	0.966667
1774	0.55	0.966667
1775	0.6	0.966667
1776	0.65	0.966667
1777	0.7	0.966667
1778	0.75	0.966667
1779	0.8	0.966667
1780	0.85	0.966667
1781	0.9	0.966667
1782	0.95	0.966667
1783	0.95	1
1784	1	1
1785	0	0
1786	0	0.0333333
1787	0	0.0666667
1788	0	0.1
1789	0	0.133333
1790	0	0.166667
1791	0	0.2
1792	0	0.233333
1793	0	0.266667
1794	0	0.3
1795	0	0.333333
1796	0	0.366667
1797	0	0.4
1798	0	0.433333
1799	0	0.466667
1800	0	0.5
1801	0	0.533333
1802	0	0.566667
1803	0	0.6
1804	0.05	0.6
1805	0.05	0.633333
1806	0.1	0.633333
1807	0.15	0.633333
1808	0.15	0.666667
1809	0.15	0.7
1810	0.15	0.733333
1811	0.15	0.766667
1812	0.15	0.8
1813	0.15	0.833333
1814	0.15	0.866667
1815	0.15	0.9
1816	0.15	0.933333
1817	0.2	0.933333
1818	0.25	0.933333
1819	0.3	0.933333
1820	0.35	0.933333
1821	0.4	0.933333
1822	0.45	0.933333
1823	0.5	0.933333
1824	0.55	0.933333
1825	0.6	0.933333
1826	0.6	0.966667
1827	0.65	0.966667
1828	0.7	0.966667
1829	0.75	0.966667
1830	0.75	1
1831	0.8	1
1832	0.85	1
1833	0.9	1
1834	0.95	1
1835	1	1
1836	0	0
1837	0	0.0333333
1838	0	0.0666667
1839	0	0.1
1840	0	0.133333
1841	0	0.166667
1842	0.05	0.166667
1843	0.05	0.2
1844	0.05	0.233333
1845	0.05	0.266667
1846	0.05	0.3
1847	0.05	0.333333
1848	0.05	0.366667
1849	0.05	0.4
1850	0.05	0.433333
1851	0.05	0.466667
1852	0.05	0.5
1853	0.05	0.533333
1854	0.1	0.533333
1855	0.1	0.566667
1856	0.1	0.6
1857	0.1	0.633333
1858	0.1	0.666667
1859	0.1	0.7
1860	0.1	0.733333
1861	0.15	0.733333
1862	0.15	0.766667
1863	0.15	0.8
1864	0.15	0.833333
1865	0.2	0.833333
1866	0.2	0.866667
1867	0.2	0.9
1868	0.2	0.933333
1869	0.25	0.933333
1870	0.3	0.933333
1871	0.3	0.966667
1872	0.35	0.966667
1873	0.4	0.966667
1874	0.45	0.966667
1875	0.5	0.966667
1876	0.55	0.966667
1877	0.6	0.966667
1878	0.6	1
1879	0.65	1
1880	0.7	1
1881	0.75	1
1882	0.8	1
1883	0.85	1
1884	0.9	1
1885	0.95	1
1886	1	1
1887	0	0
1888	0	0.0333333
1889	0	0.0666667
1890	0	0.1
1891	0	0.133333
1892	0	0.166667
1893	0	0.2
1894	0	0.233333
1895	0	0.266667
1896	0	0.3
1897	0	0.333333
1898	0	0.366667
1899	0	0.4
1900	0	0.433333
1901	0	0.466667
1902	0	0.5
1903	0	0.533333
1904	0	0.566667
1905	0	0.6
1906	0	0.633333
1907	0.05	0.633333
1908	0.05	0.666667
1909	0.05	0.7
1910	0.1	0.7
1911	0.1	0.733333
1912	0.1	0.766667
1913	0.1	0.8
1914	0.1	0.833333
1915	0.15	0.833333
1916	0.2	0.833333
1917	0.25	0.833333
1918	0.3	0.833333
1919	0.35	0.833333
1920	0.35	0.866667
1921	0.35	0.9
1922	0.4	0.9
1923	0.4	0.933333
1924	0.4	0.966667
1925	0.45	0.966667
1926	0.5	0.966667
1927	0.55	0.966667
1928	0.6	0.966667
1929	0.65	0.966667
1930	0.65	1
1931	0.7	1
1932	0.75	1
1933	0.8	1
1934	0.85	1
1935	0.9	1
1936	0.95	1
1937	1	1
1938	0	0
1939	0	0.0333333
1940	0	0.0666667
1941	0	0.1
1942	0	0.133333
1943	0	0.166667
1944	0	0.2
1945	0	0.233333
1946	0	0.266667
1947	0	0.3
1948	0	0.333333
1949	0	0.366667
1950	0	0.4
1951	0	0.433333
1952	0	0.466667
1953	0	0.5
1954	0.05	0.5
1955	0.05	0.533333
1956	0.05	0.566667
1957	0.05	0.6
1958	0.1	0.6
1959	0.1	0.633333
1960	0.1	0.666667
1961	0.1	0.7
1962	0.1	0.733333
1963	0.15	0.733333
1964	0.2	0.733333
1965	0.2	0.766667
1966	0.2	0.8
1967	0.2	0.833333
1968	0.25	0.833333
1969	0.25	0.866667
1970	0.25	0.9
1971	0.25	0.933333
1972	0.3	0.933333
1973	0.35	0.933333
1974	0.35	0.966667
1975	0.35	1
1976	0.4	1
1977	0.45	1
1978	0.5	1
1979	0.55	1
1980	0.6	1
1981	0.65	1
1982	0.7	1
1983	0.75	1
1984	0.8	1
1985	0.85	1
1986	0.9	1
1987	0.95	1
1988	1	1
1989	0	0
1990	0	0.0333333
1991	0	0.0666667
1992	0	0.1
1993	0	0.133333
1994	0	0.166667
1995	0	0.2
1996	0	0.233333
1997	0	0.266667
1998	0	0.3
1999	0.05	0.3
[truncated: 23,484 more rows]

## Sheet: EDF 9a PR
	Recall	Precision
1	1	0.6
2	1	0.6
3	1	0.612245
4	1	0.625
5	1	0.638298
6	0.966667	0.630435
7	0.966667	0.644444
8	0.966667	0.659091
9	0.966667	0.674419
10	0.966667	0.690476
11	0.966667	0.707317
12	0.966667	0.725
13	0.966667	0.74359
14	0.966667	0.763158
15	0.966667	0.783784
16	0.933333	0.777778
17	0.933333	0.8
18	0.933333	0.823529
19	0.933333	0.848485
20	0.9	0.84375
21	0.866667	0.83871
22	0.866667	0.866667
23	0.866667	0.896552
24	0.833333	0.892857
25	0.8	0.888889
26	0.766667	0.884615
27	0.766667	0.92
28	0.733333	0.916667
29	0.7	0.913043
30	0.7	0.954545
31	0.666667	0.952381
32	0.666667	1
33	0.633333	1
34	0.6	1
35	0.566667	1
36	0.533333	1
37	0.5	1
38	0.466667	1
39	0.433333	1
40	0.4	1
41	0.366667	1
42	0.333333	1
43	0.3	1
44	0.266667	1
45	0.233333	1
46	0.2	1
47	0.166667	1
48	0.133333	1
49	0.1	1
50	0.0666667	1
51	0.0333333	1
52	0	1
53	1	0.6
54	1	0.6
55	1	0.612245
56	1	0.625
57	1	0.638298
58	1	0.652174
59	1	0.666667
60	1	0.681818
61	1	0.697674
62	0.966667	0.690476
63	0.966667	0.707317
64	0.966667	0.725
65	0.966667	0.74359
66	0.966667	0.763158
67	0.933333	0.756757
68	0.933333	0.777778
69	0.933333	0.8
70	0.933333	0.823529
71	0.933333	0.848485
72	0.9	0.84375
73	0.866667	0.83871
74	0.833333	0.833333
75	0.8	0.827586
76	0.8	0.857143
77	0.8	0.888889
78	0.8	0.923077
79	0.8	0.96
80	0.766667	0.958333
81	0.733333	0.956522
82	0.733333	1
83	0.7	1
84	0.666667	1
85	0.633333	1
86	0.6	1
87	0.566667	1
88	0.533333	1
89	0.5	1
90	0.466667	1
91	0.433333	1
92	0.4	1
93	0.366667	1
94	0.333333	1
95	0.3	1
96	0.266667	1
97	0.233333	1
98	0.2	1
99	0.166667	1
100	0.133333	1
101	0.1	1
102	0.0666667	1
103	0.0333333	1
104	0	1
105	1	0.6
106	1	0.6
107	1	0.612245
108	1	0.625
109	1	0.638298
110	1	0.652174
111	1	0.666667
112	1	0.681818
113	1	0.697674
114	1	0.714286
115	0.966667	0.707317
116	0.966667	0.725
117	0.966667	0.74359
118	0.966667	0.763158
119	0.966667	0.783784
120	0.966667	0.805556
121	0.966667	0.828571
122	0.966667	0.852941
123	0.933333	0.848485
124	0.9	0.84375
125	0.866667	0.83871
126	0.833333	0.833333
127	0.833333	0.862069
128	0.833333	0.892857
129	0.833333	0.925926
130	0.8	0.923077
131	0.766667	0.92
132	0.733333	0.916667
133	0.7	0.913043
134	0.666667	0.909091
135	0.666667	0.952381
136	0.633333	0.95
137	0.633333	1
138	0.6	1
139	0.566667	1
140	0.533333	1
141	0.5	1
142	0.466667	1
143	0.433333	1
144	0.4	1
145	0.366667	1
146	0.333333	1
147	0.3	1
148	0.266667	1
149	0.233333	1
150	0.2	1
151	0.166667	1
152	0.133333	1
153	0.1	1
154	0.0666667	1
155	0.0333333	1
156	0	1
157	1	0.6
158	1	0.6
159	1	0.612245
160	1	0.625
161	1	0.638298
162	1	0.652174
163	0.966667	0.644444
164	0.966667	0.659091
165	0.966667	0.674419
166	0.966667	0.690476
167	0.966667	0.707317
168	0.966667	0.725
169	0.966667	0.74359
170	0.966667	0.763158
171	0.933333	0.756757
172	0.9	0.75
173	0.9	0.771429
174	0.866667	0.764706
175	0.866667	0.787879
176	0.833333	0.78125
177	0.833333	0.806452
178	0.833333	0.833333
179	0.8	0.827586
180	0.8	0.857143
181	0.8	0.888889
182	0.8	0.923077
183	0.766667	0.92
184	0.733333	0.916667
185	0.7	0.913043
186	0.666667	0.909091
187	0.666667	0.952381
188	0.633333	0.95
189	0.633333	1
190	0.6	1
191	0.566667	1
192	0.533333	1
193	0.5	1
194	0.466667	1
195	0.433333	1
196	0.4	1
197	0.366667	1
198	0.333333	1
199	0.3	1
200	0.266667	1
201	0.233333	1
202	0.2	1
203	0.166667	1
204	0.133333	1
205	0.1	1
206	0.0666667	1
207	0.0333333	1
208	0	1
209	1	0.6
210	1	0.6
211	1	0.612245
212	1	0.625
213	1	0.638298
214	1	0.652174
215	1	0.666667
216	1	0.681818
217	1	0.697674
218	1	0.714286
219	1	0.731707
220	1	0.75
221	1	0.769231
222	1	0.789474
223	1	0.810811
224	1	0.833333
225	0.966667	0.828571
226	0.933333	0.823529
227	0.933333	0.848485
228	0.9	0.84375
229	0.9	0.870968
230	0.866667	0.866667
231	0.833333	0.862069
232	0.833333	0.892857
233	0.8	0.888889
234	0.8	0.923077
235	0.766667	0.92
236	0.733333	0.916667
237	0.7	0.913043
238	0.666667	0.909091
239	0.633333	0.904762
240	0.633333	0.95
241	0.6	0.947368
242	0.566667	0.944444
243	0.533333	0.941176
244	0.5	0.9375
245	0.466667	0.933333
246	0.433333	0.928571
247	0.4	0.923077
248	0.366667	0.916667
249	0.333333	0.909091
250	0.3	0.9
251	0.266667	0.888889
252	0.233333	0.875
253	0.2	0.857143
254	0.2	1
255	0.166667	1
256	0.133333	1
257	0.1	1
258	0.0666667	1
259	0.0333333	1
260	0	1
261	1	0.6
262	1	0.6
263	1	0.612245
264	1	0.625
265	1	0.638298
266	1	0.652174
267	1	0.666667
268	1	0.681818
269	1	0.697674
270	0.966667	0.690476
271	0.966667	0.707317
272	0.966667	0.725
273	0.966667	0.74359
274	0.933333	0.736842
275	0.933333	0.756757
276	0.9	0.75
277	0.9	0.771429
278	0.866667	0.764706
279	0.866667	0.787879
280	0.866667	0.8125
281	0.833333	0.806452
282	0.833333	0.833333
283	0.833333	0.862069
284	0.8	0.857143
285	0.8	0.888889
286	0.8	0.923077
287	0.766667	0.92
288	0.733333	0.916667
289	0.733333	0.956522
290	0.7	0.954545
291	0.666667	0.952381
292	0.633333	0.95
293	0.6	0.947368
294	0.566667	0.944444
295	0.533333	0.941176
296	0.5	0.9375
297	0.466667	0.933333
298	0.433333	0.928571
299	0.4	0.923077
300	0.366667	0.916667
301	0.333333	0.909091
302	0.3	0.9
303	0.266667	0.888889
304	0.233333	0.875
305	0.2	0.857143
306	0.166667	0.833333
307	0.133333	0.8
308	0.1	0.75
309	0.1	1
310	0.0666667	1
311	0.0333333	1
312	0	1
313	1	0.6
314	1	0.6
315	1	0.612245
316	0.966667	0.604167
317	0.966667	0.617021
318	0.966667	0.630435
319	0.966667	0.644444
320	0.966667	0.659091
321	0.966667	0.674419
322	0.966667	0.690476
323	0.966667	0.707317
324	0.966667	0.725
325	0.966667	0.74359
326	0.966667	0.763158
327	0.966667	0.783784
328	0.966667	0.805556
329	0.933333	0.8
330	0.9	0.794118
331	0.866667	0.787879
332	0.866667	0.8125
333	0.833333	0.806452
334	0.833333	0.833333
335	0.833333	0.862069
336	0.833333	0.892857
337	0.8	0.888889
338	0.766667	0.884615
339	0.766667	0.92
340	0.733333	0.916667
341	0.733333	0.956522
342	0.7	0.954545
343	0.666667	0.952381
344	0.633333	0.95
345	0.6	0.947368
346	0.6	1
347	0.566667	1
348	0.533333	1
349	0.5	1
350	0.466667	1
351	0.433333	1
352	0.4	1
353	0.366667	1
354	0.333333	1
355	0.3	1
356	0.266667	1
357	0.233333	1
358	0.2	1
359	0.166667	1
360	0.133333	1
361	0.1	1
362	0.0666667	1
363	0.0333333	1
364	0	1
365	1	0.6
366	1	0.6
367	1	0.612245
368	1	0.625
369	1	0.638298
370	1	0.652174
371	1	0.666667
372	1	0.681818
373	1	0.697674
374	1	0.714286
375	1	0.731707
376	1	0.75
377	1	0.769231
378	1	0.789474
379	1	0.810811
380	1	0.833333
381	0.966667	0.828571
382	0.966667	0.852941
383	0.933333	0.848485
384	0.933333	0.875
385	0.9	0.870968
386	0.866667	0.866667
387	0.866667	0.896552
388	0.866667	0.928571
389	0.866667	0.962963
390	0.833333	0.961538
391	0.8	0.96
392	0.766667	0.958333
393	0.733333	0.956522
394	0.7	0.954545
395	0.666667	0.952381
396	0.633333	0.95
397	0.6	0.947368
398	0.566667	0.944444
399	0.533333	0.941176
400	0.5	0.9375
401	0.466667	0.933333
402	0.433333	0.928571
403	0.4	0.923077
404	0.366667	0.916667
405	0.333333	0.909091
406	0.3	0.9
407	0.266667	0.888889
408	0.233333	0.875
409	0.233333	1
410	0.2	1
411	0.166667	1
412	0.133333	1
413	0.1	1
414	0.0666667	1
415	0.0333333	1
416	0	1
417	1	0.6
418	1	0.6
419	1	0.612245
420	1	0.625
421	1	0.638298
422	1	0.652174
423	1	0.666667
424	1	0.681818
425	1	0.697674
426	1	0.714286
427	1	0.731707
428	1	0.75
429	1	0.769231
430	1	0.789474
431	1	0.810811
432	1	0.833333
433	1	0.857143
434	1	0.882353
435	0.966667	0.878788
436	0.966667	0.90625
437	0.966667	0.935484
438	0.933333	0.933333
439	0.9	0.931034
440	0.866667	0.928571
441	0.833333	0.925926
442	0.833333	0.961538
443	0.8	0.96
444	0.766667	0.958333
445	0.766667	1
446	0.733333	1
447	0.7	1
448	0.666667	1
449	0.633333	1
450	0.6	1
451	0.566667	1
452	0.533333	1
453	0.5	1
454	0.466667	1
455	0.433333	1
456	0.4	1
457	0.366667	1
458	0.333333	1
459	0.3	1
460	0.266667	1
461	0.233333	1
462	0.2	1
463	0.166667	1
464	0.133333	1
465	0.1	1
466	0.0666667	1
467	0.0333333	1
468	0	1
469	1	0.6
470	1	0.6
471	1	0.612245
472	1	0.625
473	1	0.638298
474	1	0.652174
475	1	0.666667
476	0.966667	0.659091
477	0.966667	0.674419
478	0.966667	0.690476
479	0.966667	0.707317
480	0.966667	0.725
481	0.966667	0.74359
482	0.966667	0.763158
483	0.966667	0.783784
484	0.966667	0.805556
485	0.933333	0.8
486	0.9	0.794118
487	0.866667	0.787879
488	0.833333	0.78125
489	0.8	0.774194
490	0.8	0.8
491	0.8	0.827586
492	0.8	0.857143
493	0.8	0.888889
494	0.8	0.923077
495	0.8	0.96
496	0.766667	0.958333
497	0.766667	1
498	0.733333	1
499	0.7	1
500	0.666667	1
501	0.633333	1
502	0.6	1
503	0.566667	1
504	0.533333	1
505	0.5	1
506	0.466667	1
507	0.433333	1
508	0.4	1
509	0.366667	1
510	0.333333	1
511	0.3	1
512	0.266667	1
513	0.233333	1
514	0.2	1
515	0.166667	1
516	0.133333	1
517	0.1	1
518	0.0666667	1
519	0.0333333	1
520	0	1
521	1	0.6
522	1	0.6
523	1	0.612245
524	1	0.625
525	1	0.638298
526	1	0.652174
527	1	0.666667
528	1	0.681818
529	1	0.697674
530	1	0.714286
531	1	0.731707
532	0.966667	0.725
533	0.966667	0.74359
534	0.966667	0.763158
535	0.933333	0.756757
536	0.9	0.75
537	0.9	0.771429
538	0.9	0.794118
539	0.9	0.818182
540	0.866667	0.8125
541	0.833333	0.806452
542	0.8	0.8
543	0.766667	0.793103
544	0.766667	0.821429
545	0.733333	0.814815
546	0.7	0.807692
547	0.7	0.84
548	0.7	0.875
549	0.666667	0.869565
550	0.633333	0.863636
551	0.633333	0.904762
552	0.6	0.9
553	0.566667	0.894737
554	0.533333	0.888889
555	0.533333	0.941176
556	0.533333	1
557	0.5	1
558	0.466667	1
559	0.433333	1
560	0.4	1
561	0.366667	1
562	0.333333	1
563	0.3	1
564	0.266667	1
565	0.233333	1
566	0.2	1
567	0.166667	1
568	0.133333	1
569	0.1	1
570	0.0666667	1
571	0.0333333	1
572	0	1
573	1	0.6
574	1	0.6
575	1	0.612245
576	1	0.625
577	1	0.638298
578	1	0.652174
579	1	0.666667
580	0.966667	0.659091
581	0.966667	0.674419
582	0.966667	0.690476
583	0.966667	0.707317
584	0.966667	0.725
585	0.966667	0.74359
586	0.966667	0.763158
587	0.966667	0.783784
588	0.966667	0.805556
589	0.966667	0.828571
590	0.966667	0.852941
591	0.966667	0.878788
592	0.933333	0.875
593	0.933333	0.903226
594	0.933333	0.933333
595	0.9	0.931034
596	0.9	0.964286
597	0.866667	0.962963
598	0.833333	0.961538
599	0.8	0.96
600	0.766667	0.958333
601	0.733333	0.956522
602	0.7	0.954545
603	0.666667	0.952381
604	0.633333	0.95
605	0.6	0.947368
606	0.566667	0.944444
607	0.533333	0.941176
608	0.5	0.9375
609	0.466667	0.933333
610	0.433333	0.928571
611	0.4	0.923077
612	0.366667	0.916667
613	0.333333	0.909091
614	0.3	0.9
615	0.266667	0.888889
616	0.233333	0.875
617	0.2	0.857143
618	0.166667	0.833333
619	0.133333	0.8
620	0.133333	1
621	0.1	1
622	0.0666667	1
623	0.0333333	1
624	0	1
625	1	0.6
626	1	0.6
627	1	0.612245
628	1	0.625
629	0.966667	0.617021
630	0.966667	0.630435
631	0.966667	0.644444
632	0.966667	0.659091
633	0.966667	0.674419
634	0.966667	0.690476
635	0.966667	0.707317
636	0.966667	0.725
637	0.966667	0.74359
638	0.966667	0.763158
639	0.966667	0.783784
640	0.933333	0.777778
641	0.933333	0.8
642	0.933333	0.823529
643	0.9	0.818182
644	0.866667	0.8125
645	0.833333	0.806452
646	0.833333	0.833333
647	0.833333	0.862069
648	0.833333	0.892857
649	0.8	0.888889
650	0.8	0.923077
651	0.766667	0.92
652	0.766667	0.958333
653	0.733333	0.956522
654	0.7	0.954545
655	0.666667	0.952381
656	0.666667	1
657	0.633333	1
658	0.6	1
659	0.566667	1
660	0.533333	1
661	0.5	1
662	0.466667	1
663	0.433333	1
664	0.4	1
665	0.366667	1
666	0.333333	1
667	0.3	1
668	0.266667	1
669	0.233333	1
670	0.2	1
671	0.166667	1
672	0.133333	1
673	0.1	1
674	0.0666667	1
675	0.0333333	1
676	0	1
677	1	0.6
678	1	0.6
679	1	0.612245
680	1	0.625
681	1	0.638298
682	1	0.652174
683	0.966667	0.644444
684	0.966667	0.659091
685	0.966667	0.674419
686	0.966667	0.690476
687	0.966667	0.707317
688	0.966667	0.725
689	0.966667	0.74359
690	0.966667	0.763158
691	0.966667	0.783784
692	0.966667	0.805556
693	0.966667	0.828571
694	0.966667	0.852941
695	0.933333	0.848485
696	0.933333	0.875
697	0.933333	0.903226
698	0.9	0.9
699	0.866667	0.896552
700	0.833333	0.892857
701	0.8	0.888889
702	0.766667	0.884615
703	0.733333	0.88
704	0.733333	0.916667
705	0.733333	0.956522
706	0.7	0.954545
707	0.7	1
708	0.666667	1
709	0.633333	1
710	0.6	1
711	0.566667	1
712	0.533333	1
713	0.5	1
714	0.466667	1
715	0.433333	1
716	0.4	1
717	0.366667	1
718	0.333333	1
719	0.3	1
720	0.266667	1
721	0.233333	1
722	0.2	1
723	0.166667	1
724	0.133333	1
725	0.1	1
726	0.0666667	1
727	0.0333333	1
728	0	1
729	1	0.6
730	1	0.6
731	1	0.612245
732	1	0.625
733	1	0.638298
734	1	0.652174
735	1	0.666667
736	1	0.681818
737	0.966667	0.674419
738	0.966667	0.690476
739	0.966667	0.707317
740	0.966667	0.725
741	0.966667	0.74359
742	0.966667	0.763158
743	0.966667	0.783784
744	0.933333	0.777778
745	0.933333	0.8
746	0.933333	0.823529
747	0.933333	0.848485
748	0.933333	0.875
749	0.9	0.870968
750	0.866667	0.866667
751	0.833333	0.862069
752	0.833333	0.892857
753	0.833333	0.925926
754	0.8	0.923077
755	0.766667	0.92
756	0.733333	0.916667
757	0.7	0.913043
758	0.666667	0.909091
759	0.633333	0.904762
760	0.6	0.9
761	0.566667	0.894737
762	0.533333	0.888889
763	0.5	0.882353
764	0.466667	0.875
765	0.466667	0.933333
766	0.466667	1
767	0.433333	1
768	0.4	1
769	0.366667	1
770	0.333333	1
771	0.3	1
772	0.266667	1
773	0.233333	1
774	0.2	1
775	0.166667	1
776	0.133333	1
777	0.1	1
778	0.0666667	1
779	0.0333333	1
780	0	1
781	1	0.6
782	1	0.6
783	1	0.612245
784	0.966667	0.604167
785	0.966667	0.617021
786	0.933333	0.608696
787	0.933333	0.622222
788	0.933333	0.636364
789	0.933333	0.651163
790	0.933333	0.666667
791	0.933333	0.682927
792	0.933333	0.7
793	0.933333	0.717949
794	0.933333	0.736842
795	0.933333	0.756757
796	0.933333	0.777778
797	0.933333	0.8
798	0.933333	0.823529
799	0.9	0.818182
800	0.9	0.84375
801	0.9	0.870968
802	0.9	0.9
803	0.866667	0.896552
804	0.833333	0.892857
805	0.8	0.888889
806	0.766667	0.884615
807	0.733333	0.88
808	0.733333	0.916667
809	0.7	0.913043
810	0.7	0.954545
811	0.666667	0.952381
812	0.633333	0.95
813	0.6	0.947368
814	0.566667	0.944444
815	0.533333	0.941176
816	0.5	0.9375
817	0.466667	0.933333
818	0.433333	0.928571
819	0.4	0.923077
820	0.366667	0.916667
821	0.366667	1
822	0.333333	1
823	0.3	1
824	0.266667	1
825	0.233333	1
826	0.2	1
827	0.166667	1
828	0.133333	1
829	0.1	1
830	0.0666667	1
831	0.0333333	1
832	0	1
833	1	0.6
834	1	0.6
835	1	0.612245
836	1	0.625
837	1	0.638298
838	1	0.652174
839	1	0.666667
840	0.966667	0.659091
841	0.966667	0.674419
842	0.966667	0.690476
843	0.966667	0.707317
844	0.966667	0.725
845	0.966667	0.74359
846	0.933333	0.736842
847	0.9	0.72973
848	0.9	0.75
849	0.866667	0.742857
850	0.866667	0.764706
851	0.866667	0.787879
852	0.833333	0.78125
853	0.8	0.774194
854	0.8	0.8
855	0.766667	0.793103
856	0.766667	0.821429
857	0.766667	0.851852
858	0.733333	0.846154
859	0.733333	0.88
860	0.733333	0.916667
861	0.733333	0.956522
862	0.7	0.954545
863	0.666667	0.952381
864	0.633333	0.95
865	0.6	0.947368
866	0.566667	0.944444
867	0.533333	0.941176
868	0.5	0.9375
869	0.466667	0.933333
870	0.433333	0.928571
871	0.4	0.923077
872	0.4	0.923077
873	0.366667	0.916667
874	0.333333	0.909091
875	0.333333	0.909091
876	0.333333	1
877	0.3	1
878	0.266667	1
879	0.233333	1
880	0.2	1
881	0.166667	1
882	0.133333	1
883	0.1	1
884	0.0666667	1
885	0.0333333	1
886	0	1
887	1	0.6
888	1	0.6
889	1	0.612245
890	1	0.625
891	1	0.638298
892	1	0.652174
893	1	0.666667
894	1	0.681818
895	1	0.697674
896	0.966667	0.690476
897	0.966667	0.707317
898	0.966667	0.725
899	0.966667	0.74359
900	0.966667	0.763158
901	0.966667	0.783784
902	0.966667	0.805556
903	0.966667	0.828571
904	0.966667	0.852941
905	0.966667	0.878788
906	0.933333	0.875
907	0.933333	0.903226
908	0.9	0.9
909	0.866667	0.896552
910	0.833333	0.892857
911	0.8	0.888889
912	0.766667	0.884615
913	0.733333	0.88
914	0.733333	0.916667
915	0.7	0.913043
916	0.7	0.954545
917	0.666667	0.952381
918	0.633333	0.95
919	0.6	0.947368
920	0.566667	0.944444
921	0.533333	0.941176
922	0.5	0.9375
923	0.466667	0.933333
924	0.433333	0.928571
925	0.433333	1
926	0.4	1
927	0.366667	1
928	0.333333	1
929	0.3	1
930	0.266667	1
931	0.233333	1
932	0.2	1
933	0.166667	1
934	0.133333	1
935	0.1	1
936	0.0666667	1
937	0.0333333	1
938	0	1
939	1	0.6
940	1	0.6
941	1	0.612245
942	0.966667	0.604167
943	0.966667	0.617021
944	0.966667	0.630435
945	0.966667	0.644444
946	0.966667	0.659091
947	0.966667	0.674419
948	0.966667	0.690476
949	0.966667	0.707317
950	0.966667	0.725
951	0.966667	0.74359
952	0.966667	0.763158
953	0.966667	0.783784
954	0.966667	0.805556
955	0.933333	0.8
956	0.9	0.794118
957	0.866667	0.787879
958	0.833333	0.78125
959	0.833333	0.806452
960	0.833333	0.833333
961	0.8	0.827586
962	0.766667	0.821429
963	0.733333	0.814815
964	0.7	0.807692
965	0.7	0.84
966	0.666667	0.833333
967	0.633333	0.826087
968	0.6	0.818182
969	0.6	0.857143
970	0.6	0.9
971	0.566667	0.894737
972	0.566667	0.944444
973	0.533333	0.941176
974	0.533333	1
975	0.5	1
976	0.466667	1
977	0.433333	1
978	0.4	1
979	0.366667	1
980	0.333333	1
981	0.3	1
982	0.266667	1
983	0.233333	1
984	0.2	1
985	0.166667	1
986	0.133333	1
987	0.1	1
988	0.0666667	1
989	0.0333333	1
990	0	1
991	1	0.6
992	1	0.6
993	1	0.612245
994	1	0.625
995	1	0.638298
996	1	0.652174
997	1	0.666667
998	1	0.681818
999	1	0.697674
1000	1	0.714286
1001	1	0.731707
1002	1	0.75
1003	1	0.769231
1004	1	0.789474
1005	1	0.810811
1006	0.966667	0.805556
1007	0.966667	0.828571
1008	0.966667	0.852941
1009	0.933333	0.848485
1010	0.9	0.84375
1011	0.866667	0.83871
1012	0.866667	0.866667
1013	0.833333	0.862069
1014	0.833333	0.892857
1015	0.8	0.888889
1016	0.766667	0.884615
1017	0.733333	0.88
1018	0.7	0.875
1019	0.666667	0.869565
1020	0.633333	0.863636
1021	0.6	0.857143
1022	0.566667	0.85
1023	0.533333	0.842105
1024	0.5	0.833333
1025	0.466667	0.823529
1026	0.466667	0.875
1027	0.433333	0.866667
1028	0.433333	0.928571
1029	0.4	0.923077
1030	0.4	1
1031	0.366667	1
1032	0.333333	1
1033	0.3	1
1034	0.266667	1
1035	0.233333	1
1036	0.2	1
1037	0.166667	1
1038	0.133333	1
1039	0.1	1
1040	0.0666667	1
1041	0.0333333	1
1042	0	1
1043	1	0.6
1044	1	0.6
1045	1	0.612245
1046	1	0.625
1047	1	0.638298
1048	1	0.652174
1049	1	0.666667
1050	1	0.681818
1051	1	0.697674
1052	1	0.714286
1053	1	0.731707
1054	1	0.75
1055	1	0.769231
1056	0.966667	0.763158
1057	0.966667	0.783784
1058	0.966667	0.805556
1059	0.966667	0.828571
1060	0.933333	0.823529
1061	0.933333	0.848485
1062	0.933333	0.875
1063	0.933333	0.903226
1064	0.9	0.9
1065	0.866667	0.896552
1066	0.833333	0.892857
1067	0.833333	0.925926
1068	0.8	0.923077
1069	0.766667	0.92
1070	0.733333	0.916667
1071	0.733333	0.956522
1072	0.7	0.954545
1073	0.666667	0.952381
1074	0.666667	1
1075	0.633333	1
1076	0.6	1
1077	0.566667	1
1078	0.533333	1
1079	0.5	1
1080	0.466667	1
1081	0.433333	1
1082	0.4	1
1083	0.366667	1
1084	0.333333	1
1085	0.3	1
1086	0.266667	1
1087	0.233333	1
1088	0.2	1
1089	0.166667	1
1090	0.133333	1
1091	0.1	1
1092	0.0666667	1
1093	0.0333333	1
1094	0	1
1095	1	0.6
1096	1	0.6
1097	1	0.612245
1098	1	0.625
1099	1	0.638298
1100	1	0.652174
1101	1	0.666667
1102	1	0.681818
1103	1	0.697674
1104	1	0.714286
1105	1	0.731707
1106	1	0.75
1107	1	0.769231
1108	1	0.789474
1109	1	0.810811
1110	0.966667	0.805556
1111	0.966667	0.828571
1112	0.966667	0.852941
1113	0.933333	0.848485
1114	0.9	0.84375
1115	0.866667	0.83871
1116	0.866667	0.866667
1117	0.866667	0.896552
1118	0.866667	0.928571
1119	0.866667	0.962963
1120	0.833333	0.961538
1121	0.833333	1
1122	0.8	1
1123	0.766667	1
1124	0.733333	1
1125	0.7	1
1126	0.666667	1
1127	0.633333	1
1128	0.6	1
1129	0.566667	1
1130	0.533333	1
1131	0.5	1
1132	0.466667	1
1133	0.433333	1
1134	0.4	1
1135	0.366667	1
1136	0.333333	1
1137	0.3	1
1138	0.266667	1
1139	0.233333	1
1140	0.2	1
1141	0.166667	1
1142	0.133333	1
1143	0.1	1
1144	0.0666667	1
1145	0.0333333	1
1146	0	1
1147	1	0.6
1148	1	0.6
1149	1	0.612245
1150	1	0.625
1151	1	0.638298
1152	1	0.652174
1153	1	0.666667
1154	1	0.681818
1155	1	0.697674
1156	1	0.714286
1157	1	0.731707
1158	1	0.75
1159	1	0.769231
1160	1	0.789474
1161	1	0.810811
1162	0.966667	0.805556
1163	0.966667	0.828571
1164	0.966667	0.852941
1165	0.933333	0.848485
1166	0.933333	0.875
1167	0.933333	0.903226
1168	0.9	0.9
1169	0.9	0.931034
1170	0.866667	0.928571
1171	0.833333	0.925926
1172	0.8	0.923077
1173	0.766667	0.92
1174	0.766667	0.958333
1175	0.733333	0.956522
1176	0.7	0.954545
1177	0.7	1
1178	0.666667	1
1179	0.633333	1
1180	0.6	1
1181	0.566667	1
1182	0.533333	1
1183	0.5	1
1184	0.466667	1
1185	0.433333	1
1186	0.4	1
1187	0.366667	1
1188	0.333333	1
1189	0.3	1
1190	0.266667	1
1191	0.233333	1
1192	0.2	1
1193	0.166667	1
1194	0.133333	1
1195	0.1	1
1196	0.0666667	1
1197	0.0333333	1
1198	0	1
1199	1	0.6
1200	1	0.6
1201	1	0.612245
1202	1	0.625
1203	1	0.638298
1204	1	0.652174
1205	1	0.666667
1206	1	0.681818
1207	1	0.697674
1208	1	0.714286
1209	1	0.731707
1210	1	0.75
1211	1	0.769231
1212	1	0.789474
1213	1	0.810811
1214	0.966667	0.805556
1215	0.966667	0.828571
1216	0.966667	0.852941
1217	0.966667	0.878788
1218	0.933333	0.875
1219	0.933333	0.903226
1220	0.9	0.9
1221	0.866667	0.896552
1222	0.866667	0.928571
1223	0.866667	0.962963
1224	0.833333	0.961538
1225	0.8	0.96
1226	0.766667	0.958333
1227	0.766667	1
1228	0.733333	1
1229	0.7	1
1230	0.666667	1
1231	0.633333	1
1232	0.6	1
1233	0.566667	1
1234	0.533333	1
1235	0.5	1
1236	0.466667	1
1237	0.433333	1
1238	0.4	1
1239	0.366667	1
1240	0.333333	1
1241	0.3	1
1242	0.266667	1
1243	0.233333	1
1244	0.2	1
1245	0.166667	1
1246	0.133333	1
1247	0.1	1
1248	0.0666667	1
1249	0.0333333	1
1250	0	1
1251	1	0.6
1252	1	0.6
1253	1	0.612245
1254	1	0.625
1255	1	0.638298
1256	1	0.652174
1257	1	0.666667
1258	1	0.681818
1259	1	0.697674
1260	1	0.714286
1261	1	0.731707
1262	1	0.75
1263	1	0.769231
1264	0.966667	0.763158
1265	0.966667	0.783784
1266	0.933333	0.777778
1267	0.9	0.771429
1268	0.866667	0.764706
1269	0.833333	0.757576
1270	0.833333	0.78125
1271	0.833333	0.806452
1272	0.833333	0.833333
1273	0.8	0.827586
1274	0.8	0.857143
1275	0.8	0.888889
1276	0.766667	0.884615
1277	0.766667	0.92
1278	0.733333	0.916667
1279	0.7	0.913043
1280	0.666667	0.909091
1281	0.633333	0.904762
1282	0.6	0.9
1283	0.566667	0.894737
1284	0.533333	0.888889
1285	0.533333	0.941176
1286	0.5	0.9375
1287	0.466667	0.933333
1288	0.433333	0.928571
1289	0.4	0.923077
1290	0.366667	0.916667
1291	0.366667	1
1292	0.333333	1
1293	0.3	1
1294	0.266667	1
1295	0.233333	1
1296	0.2	1
1297	0.166667	1
1298	0.133333	1
1299	0.1	1
1300	0.0666667	1
1301	0.0333333	1
1302	0	1
1303	1	0.6
1304	1	0.6
1305	1	0.612245
1306	1	0.625
1307	1	0.638298
1308	0.966667	0.630435
1309	0.966667	0.644444
1310	0.966667	0.659091
1311	0.966667	0.674419
1312	0.966667	0.690476
1313	0.966667	0.707317
1314	0.966667	0.725
1315	0.966667	0.74359
1316	0.966667	0.763158
1317	0.966667	0.783784
1318	0.966667	0.805556
1319	0.933333	0.8
1320	0.933333	0.823529
1321	0.933333	0.848485
1322	0.9	0.84375
1323	0.9	0.870968
1324	0.9	0.9
1325	0.866667	0.896552
1326	0.866667	0.928571
1327	0.866667	0.962963
1328	0.833333	0.961538
1329	0.8	0.96
1330	0.766667	0.958333
1331	0.733333	0.956522
1332	0.7	0.954545
1333	0.666667	0.952381
1334	0.633333	0.95
1335	0.6	0.947368
1336	0.566667	0.944444
1337	0.566667	1
1338	0.533333	1
1339	0.5	1
1340	0.466667	1
1341	0.433333	1
1342	0.4	1
1343	0.366667	1
1344	0.333333	1
1345	0.3	1
1346	0.266667	1
1347	0.233333	1
1348	0.2	1
1349	0.166667	1
1350	0.133333	1
1351	0.1	1
1352	0.0666667	1
1353	0.0333333	1
1354	0	1
1355	1	0.6
1356	1	0.6
1357	1	0.612245
1358	1	0.625
1359	1	0.638298
1360	1	0.652174
1361	1	0.666667
1362	0.966667	0.659091
1363	0.966667	0.674419
1364	0.966667	0.690476
1365	0.966667	0.707317
1366	0.966667	0.725
1367	0.966667	0.74359
1368	0.966667	0.763158
1369	0.933333	0.756757
1370	0.933333	0.777778
1371	0.933333	0.8
1372	0.933333	0.823529
1373	0.9	0.818182
1374	0.9	0.84375
1375	0.9	0.870968
1376	0.9	0.9
1377	0.9	0.931034
1378	0.9	0.964286
1379	0.866667	0.962963
1380	0.866667	1
1381	0.833333	1
1382	0.8	1
1383	0.766667	1
1384	0.733333	1
1385	0.7	1
1386	0.666667	1
1387	0.633333	1
1388	0.6	1
1389	0.566667	1
1390	0.533333	1
1391	0.5	1
1392	0.466667	1
1393	0.433333	1
1394	0.4	1
1395	0.366667	1
1396	0.333333	1
1397	0.3	1
1398	0.266667	1
1399	0.233333	1
1400	0.2	1
1401	0.166667	1
1402	0.133333	1
1403	0.1	1
1404	0.0666667	1
1405	0.0333333	1
1406	0	1
1407	1	0.6
1408	1	0.6
1409	1	0.612245
1410	1	0.625
1411	1	0.638298
1412	1	0.652174
1413	1	0.666667
1414	0.966667	0.659091
1415	0.966667	0.674419
1416	0.966667	0.690476
1417	0.966667	0.707317
1418	0.966667	0.725
1419	0.966667	0.74359
1420	0.966667	0.763158
1421	0.966667	0.783784
1422	0.966667	0.805556
1423	0.966667	0.828571
1424	0.966667	0.852941
1425	0.933333	0.848485
1426	0.933333	0.875
1427	0.9	0.870968
1428	0.9	0.9
1429	0.9	0.931034
1430	0.866667	0.928571
1431	0.833333	0.925926
1432	0.8	0.923077
1433	0.8	0.96
1434	0.766667	0.958333
1435	0.733333	0.956522
1436	0.7	0.954545
1437	0.666667	0.952381
1438	0.633333	0.95
1439	0.6	0.947368
1440	0.566667	0.944444
1441	0.566667	1
1442	0.533333	1
1443	0.5	1
1444	0.466667	1
1445	0.433333	1
1446	0.4	1
1447	0.366667	1
1448	0.333333	1
1449	0.3	1
1450	0.266667	1
1451	0.233333	1
1452	0.2	1
1453	0.166667	1
1454	0.133333	1
1455	0.1	1
1456	0.0666667	1
1457	0.0333333	1
1458	0	1
1459	1	0.6
1460	1	0.6
1461	1	0.612245
1462	1	0.625
1463	1	0.638298
1464	1	0.652174
1465	1	0.666667
1466	1	0.681818
1467	1	0.697674
1468	1	0.714286
1469	1	0.731707
1470	0.966667	0.725
1471	0.933333	0.717949
1472	0.933333	0.736842
1473	0.933333	0.756757
1474	0.933333	0.777778
1475	0.933333	0.8
1476	0.933333	0.823529
1477	0.9	0.818182
1478	0.866667	0.8125
1479	0.866667	0.83871
1480	0.833333	0.833333
1481	0.8	0.827586
1482	0.766667	0.821429
1483	0.733333	0.814815
1484	0.733333	0.846154
1485	0.7	0.84
1486	0.666667	0.833333
1487	0.666667	0.869565
1488	0.633333	0.863636
1489	0.633333	0.904762
1490	0.6	0.9
1491	0.566667	0.894737
1492	0.566667	0.944444
1493	0.566667	1
1494	0.533333	1
1495	0.5	1
1496	0.466667	1
1497	0.433333	1
1498	0.4	1
1499	0.366667	1
1500	0.333333	1
1501	0.3	1
1502	0.266667	1
1503	0.233333	1
1504	0.2	1
1505	0.166667	1
1506	0.133333	1
1507	0.1	1
1508	0.0666667	1
1509	0.0333333	1
1510	0	1
1511	1	0.6
1512	1	0.6
1513	1	0.612245
1514	1	0.625
1515	1	0.638298
1516	1	0.652174
1517	1	0.666667
1518	1	0.681818
1519	1	0.697674
1520	1	0.714286
1521	1	0.731707
1522	0.966667	0.725
1523	0.933333	0.717949
1524	0.933333	0.736842
1525	0.933333	0.756757
1526	0.933333	0.777778
1527	0.9	0.771429
1528	0.9	0.794118
1529	0.9	0.818182
1530	0.9	0.84375
1531	0.866667	0.83871
1532	0.866667	0.866667
1533	0.866667	0.896552
1534	0.866667	0.928571
1535	0.833333	0.925926
1536	0.8	0.923077
1537	0.766667	0.92
1538	0.733333	0.916667
1539	0.7	0.913043
1540	0.7	0.954545
1541	0.666667	0.952381
1542	0.633333	0.95
1543	0.6	0.947368
1544	0.566667	0.944444
1545	0.533333	0.941176
1546	0.5	0.9375
1547	0.466667	0.933333
1548	0.433333	0.928571
1549	0.4	0.923077
1550	0.366667	0.916667
1551	0.333333	0.909091
1552	0.3	0.9
1553	0.3	1
1554	0.266667	1
1555	0.233333	1
1556	0.2	1
1557	0.166667	1
1558	0.133333	1
1559	0.1	1
1560	0.0666667	1
1561	0.0333333	1
1562	0	1
1563	1	0.6
1564	1	0.6
1565	0.966667	0.591837
1566	0.966667	0.604167
1567	0.966667	0.617021
1568	0.966667	0.630435
1569	0.966667	0.644444
1570	0.966667	0.659091
1571	0.966667	0.674419
1572	0.966667	0.690476
1573	0.966667	0.707317
1574	0.966667	0.725
1575	0.966667	0.74359
1576	0.966667	0.763158
1577	0.966667	0.783784
1578	0.933333	0.777778
1579	0.933333	0.8
1580	0.933333	0.823529
1581	0.933333	0.848485
1582	0.933333	0.875
1583	0.9	0.870968
1584	0.9	0.9
1585	0.866667	0.896552
1586	0.866667	0.928571
1587	0.833333	0.925926
1588	0.8	0.923077
1589	0.8	0.96
1590	0.766667	0.958333
1591	0.733333	0.956522
1592	0.7	0.954545
1593	0.666667	0.952381
1594	0.633333	0.95
1595	0.6	0.947368
1596	0.566667	0.944444
1597	0.533333	0.941176
1598	0.533333	1
1599	0.5	1
1600	0.466667	1
1601	0.433333	1
1602	0.4	1
1603	0.366667	1
1604	0.333333	1
1605	0.3	1
1606	0.266667	1
1607	0.233333	1
1608	0.2	1
1609	0.166667	1
1610	0.133333	1
1611	0.1	1
1612	0.0666667	1
1613	0.0333333	1
1614	0	1
1615	1	0.6
1616	1	0.6
1617	1	0.612245
1618	1	0.625
1619	1	0.638298
1620	1	0.652174
1621	1	0.666667
1622	1	0.681818
1623	1	0.697674
1624	1	0.714286
1625	1	0.731707
1626	1	0.75
1627	1	0.769231
1628	1	0.789474
1629	1	0.810811
1630	0.966667	0.805556
1631	0.966667	0.828571
1632	0.966667	0.852941
1633	0.966667	0.878788
1634	0.933333	0.875
1635	0.9	0.870968
1636	0.9	0.9
1637	0.866667	0.896552
1638	0.833333	0.892857
1639	0.8	0.888889
1640	0.8	0.923077
1641	0.766667	0.92
1642	0.733333	0.916667
1643	0.7	0.913043
1644	0.666667	0.909091
1645	0.633333	0.904762
1646	0.633333	0.95
1647	0.6	0.947368
1648	0.566667	0.944444
1649	0.533333	0.941176
1650	0.5	0.9375
1651	0.466667	0.933333
1652	0.433333	0.928571
1653	0.4	0.923077
1654	0.4	1
1655	0.366667	1
1656	0.333333	1
1657	0.3	1
1658	0.266667	1
1659	0.233333	1
1660	0.2	1
1661	0.166667	1
1662	0.133333	1
1663	0.1	1
1664	0.0666667	1
1665	0.0333333	1
1666	0	1
1667	1	0.6
1668	1	0.6
1669	1	0.612245
1670	1	0.625
1671	1	0.638298
1672	0.966667	0.630435
1673	0.966667	0.644444
1674	0.966667	0.659091
1675	0.966667	0.674419
1676	0.966667	0.690476
1677	0.933333	0.682927
1678	0.933333	0.7
1679	0.933333	0.717949
1680	0.933333	0.736842
1681	0.933333	0.756757
1682	0.933333	0.777778
1683	0.933333	0.8
1684	0.933333	0.823529
1685	0.933333	0.848485
1686	0.9	0.84375
1687	0.9	0.870968
1688	0.9	0.9
1689	0.866667	0.896552
1690	0.866667	0.928571
1691	0.833333	0.925926
1692	0.833333	0.961538
1693	0.8	0.96
1694	0.766667	0.958333
1695	0.733333	0.956522
1696	0.7	0.954545
1697	0.666667	0.952381
1698	0.666667	1
1699	0.633333	1
1700	0.6	1
1701	0.566667	1
1702	0.533333	1
1703	0.5	1
1704	0.466667	1
1705	0.433333	1
1706	0.4	1
1707	0.366667	1
1708	0.333333	1
1709	0.3	1
1710	0.266667	1
1711	0.233333	1
1712	0.2	1
1713	0.166667	1
1714	0.133333	1
1715	0.1	1
1716	0.0666667	1
1717	0.0333333	1
1718	0	1
1719	1	0.6
1720	1	0.6
1721	1	0.612245
1722	1	0.625
1723	1	0.638298
1724	1	0.652174
1725	1	0.666667
1726	1	0.681818
1727	1	0.697674
1728	1	0.714286
1729	1	0.731707
1730	1	0.75
1731	1	0.769231
1732	1	0.789474
1733	0.966667	0.783784
1734	0.966667	0.805556
1735	0.933333	0.8
1736	0.933333	0.823529
1737	0.933333	0.848485
1738	0.933333	0.875
1739	0.9	0.870968
1740	0.866667	0.866667
1741	0.866667	0.896552
1742	0.833333	0.892857
1743	0.833333	0.925926
1744	0.833333	0.961538
1745	0.8	0.96
1746	0.766667	0.958333
1747	0.733333	0.956522
1748	0.7	0.954545
1749	0.666667	0.952381
1750	0.633333	0.95
1751	0.6	0.947368
1752	0.566667	0.944444
1753	0.533333	0.941176
1754	0.5	0.9375
1755	0.466667	0.933333
1756	0.433333	0.928571
1757	0.4	0.923077
1758	0.366667	0.916667
1759	0.333333	0.909091
1760	0.3	0.9
1761	0.266667	0.888889
1762	0.266667	1
1763	0.233333	1
1764	0.2	1
1765	0.166667	1
1766	0.133333	1
1767	0.1	1
1768	0.0666667	1
1769	0.0333333	1
1770	0	1
1771	1	0.6
1772	1	0.6
1773	1	0.612245
1774	0.966667	0.604167
1775	0.966667	0.617021
1776	0.966667	0.630435
1777	0.966667	0.644444
1778	0.966667	0.659091
1779	0.966667	0.674419
1780	0.966667	0.690476
1781	0.966667	0.707317
1782	0.966667	0.725
1783	0.966667	0.74359
1784	0.966667	0.763158
1785	0.966667	0.783784
1786	0.966667	0.805556
1787	0.966667	0.828571
1788	0.933333	0.823529
1789	0.933333	0.848485
1790	0.9	0.84375
1791	0.866667	0.83871
1792	0.866667	0.866667
1793	0.866667	0.896552
1794	0.833333	0.892857
1795	0.8	0.888889
1796	0.766667	0.884615
1797	0.733333	0.88
1798	0.7	0.875
1799	0.666667	0.869565
1800	0.633333	0.863636
1801	0.633333	0.904762
1802	0.6	0.9
1803	0.566667	0.894737
1804	0.566667	0.944444
1805	0.533333	0.941176
1806	0.5	0.9375
1807	0.466667	0.933333
1808	0.466667	1
1809	0.433333	1
1810	0.4	1
1811	0.366667	1
1812	0.333333	1
1813	0.3	1
1814	0.266667	1
1815	0.233333	1
1816	0.2	1
1817	0.166667	1
1818	0.133333	1
1819	0.1	1
1820	0.0666667	1
1821	0.0333333	1
1822	0	1
1823	1	0.6
1824	1	0.6
1825	1	0.612245
1826	1	0.625
1827	1	0.638298
1828	1	0.652174
1829	1	0.666667
1830	0.966667	0.659091
1831	0.966667	0.674419
1832	0.966667	0.690476
1833	0.966667	0.707317
1834	0.933333	0.7
1835	0.933333	0.717949
1836	0.933333	0.736842
1837	0.933333	0.756757
1838	0.933333	0.777778
1839	0.933333	0.8
1840	0.933333	0.823529
1841	0.933333	0.848485
1842	0.933333	0.875
1843	0.933333	0.903226
1844	0.9	0.9
1845	0.866667	0.896552
1846	0.833333	0.892857
1847	0.8	0.888889
1848	0.766667	0.884615
1849	0.733333	0.88
1850	0.7	0.875
1851	0.666667	0.869565
1852	0.633333	0.863636
1853	0.633333	0.904762
1854	0.633333	0.95
1855	0.6	0.947368
1856	0.6	1
1857	0.566667	1
1858	0.533333	1
1859	0.5	1
1860	0.466667	1
1861	0.433333	1
1862	0.4	1
1863	0.366667	1
1864	0.333333	1
1865	0.3	1
1866	0.266667	1
1867	0.233333	1
1868	0.2	1
1869	0.166667	1
1870	0.133333	1
1871	0.1	1
1872	0.0666667	1
1873	0.0333333	1
1874	0	1
1875	1	0.6
1876	1	0.6
1877	1	0.612245
1878	1	0.625
1879	1	0.638298
1880	1	0.652174
1881	1	0.666667
1882	1	0.681818
1883	1	0.697674
1884	1	0.714286
1885	0.966667	0.707317
1886	0.966667	0.725
1887	0.966667	0.74359
1888	0.966667	0.763158
1889	0.966667	0.783784
1890	0.966667	0.805556
1891	0.966667	0.828571
1892	0.933333	0.823529
1893	0.933333	0.848485
1894	0.933333	0.875
1895	0.9	0.870968
1896	0.866667	0.866667
1897	0.833333	0.862069
1898	0.833333	0.892857
1899	0.8	0.888889
1900	0.766667	0.884615
1901	0.733333	0.88
1902	0.733333	0.916667
1903	0.7	0.913043
1904	0.666667	0.909091
1905	0.633333	0.904762
1906	0.6	0.9
1907	0.566667	0.894737
1908	0.533333	0.888889
1909	0.533333	0.941176
1910	0.5	0.9375
1911	0.466667	0.933333
1912	0.433333	0.928571
1913	0.4	0.923077
1914	0.366667	0.916667
1915	0.333333	0.909091
1916	0.3	0.9
1917	0.266667	0.888889
1918	0.233333	0.875
1919	0.2	0.857143
1920	0.166667	0.833333
1921	0.166667	1
1922	0.133333	1
1923	0.1	1
1924	0.0666667	1
1925	0.0333333	1
1926	0	1
1927	1	0.6
1928	1	0.6
1929	1	0.612245
1930	1	0.625
1931	1	0.638298
1932	1	0.652174
1933	1	0.666667
1934	1	0.681818
1935	1	0.697674
1936	0.966667	0.690476
1937	0.966667	0.707317
1938	0.966667	0.725
1939	0.966667	0.74359
1940	0.966667	0.763158
1941	0.966667	0.783784
1942	0.933333	0.777778
1943	0.9	0.771429
1944	0.9	0.794118
1945	0.866667	0.787879
1946	0.833333	0.78125
1947	0.833333	0.806452
1948	0.833333	0.833333
1949	0.833333	0.862069
1950	0.833333	0.892857
1951	0.833333	0.925926
1952	0.8	0.923077
1953	0.766667	0.92
1954	0.733333	0.916667
1955	0.7	0.913043
1956	0.7	0.954545
1957	0.666667	0.952381
1958	0.633333	0.95
1959	0.633333	1
1960	0.6	1
1961	0.566667	1
1962	0.533333	1
1963	0.5	1
1964	0.466667	1
1965	0.433333	1
1966	0.4	1
1967	0.366667	1
1968	0.333333	1
1969	0.3	1
1970	0.266667	1
1971	0.233333	1
1972	0.2	1
1973	0.166667	1
1974	0.133333	1
1975	0.1	1
1976	0.0666667	1
1977	0.0333333	1
1978	0	1
1979	1	0.6
1980	1	0.6
1981	1	0.612245
1982	1	0.625
1983	1	0.638298
1984	1	0.652174
1985	1	0.666667
1986	1	0.681818
1987	1	0.697674
1988	1	0.714286
1989	1	0.731707
1990	1	0.75
1991	1	0.769231
1992	1	0.789474
1993	1	0.810811
1994	0.966667	0.805556
1995	0.933333	0.8
1996	0.933333	0.823529
1997	0.933333	0.848485
1998	0.9	0.84375
1999	0.866667	0.83871
[truncated: 23,994 more rows]

## Sheet: EDF 9b ROC
	FPR	Sensitivity	Probability Cutoff	Class 1	Class 2
1	0	0	0.987338	PC	Control
2	0	0.0169492	0.984353	PC	Control
3	0	0.0338983	0.983276	PC	Control
4	0	0.0508475	0.982308	PC	Control
5	0	0.0677966	0.981145	PC	Control
6	0	0.0847458	0.981104	PC	Control
7	0	0.101695	0.979609	PC	Control
8	0	0.118644	0.97922	PC	Control
9	0	0.135593	0.978063	PC	Control
10	0	0.152542	0.976959	PC	Control
11	0	0.169492	0.975509	PC	Control
12	0	0.186441	0.975396	PC	Control
13	0	0.20339	0.974275	PC	Control
14	0	0.220339	0.972043	PC	Control
15	0	0.237288	0.971242	PC	Control
16	0	0.254237	0.970821	PC	Control
17	0	0.271186	0.968573	PC	Control
18	0	0.288136	0.965306	PC	Control
19	0	0.305085	0.964561	PC	Control
20	0	0.322034	0.960887	PC	Control
21	0	0.338983	0.960411	PC	Control
22	0	0.355932	0.959632	PC	Control
23	0	0.372881	0.95905	PC	Control
24	0	0.389831	0.958648	PC	Control
25	0	0.40678	0.955744	PC	Control
26	0	0.423729	0.955568	PC	Control
27	0	0.440678	0.955418	PC	Control
28	0	0.457627	0.952783	PC	Control
29	0	0.474576	0.948623	PC	Control
30	0	0.491525	0.943576	PC	Control
31	0	0.508475	0.942314	PC	Control
32	0.0144928	0.508475	0.931382	PC	Control
33	0.0144928	0.525424	0.926892	PC	Control
34	0.0289855	0.525424	0.915702	PC	Control
35	0.0289855	0.542373	0.912443	PC	Control
36	0.0289855	0.559322	0.911248	PC	Control
37	0.0289855	0.576271	0.909002	PC	Control
38	0.0434783	0.576271	0.901924	PC	Control
39	0.0434783	0.59322	0.900325	PC	Control
40	0.0434783	0.610169	0.897958	PC	Control
41	0.0434783	0.627119	0.887055	PC	Control
42	0.0434783	0.644068	0.886119	PC	Control
43	0.0434783	0.661017	0.876771	PC	Control
44	0.0434783	0.677966	0.860481	PC	Control
45	0.0434783	0.694915	0.859275	PC	Control
46	0.0434783	0.711864	0.848727	PC	Control
47	0.0434783	0.728814	0.844071	PC	Control
48	0.0434783	0.745763	0.828379	PC	Control
49	0.0434783	0.762712	0.796375	PC	Control
50	0.0434783	0.779661	0.769903	PC	Control
51	0.0434783	0.79661	0.749977	PC	Control
52	0.057971	0.79661	0.726984	PC	Control
53	0.0724638	0.79661	0.695339	PC	Control
54	0.0724638	0.813559	0.683458	PC	Control
55	0.0724638	0.830508	0.660602	PC	Control
56	0.0869565	0.830508	0.651971	PC	Control
57	0.101449	0.830508	0.629902	PC	Control
58	0.101449	0.847458	0.625929	PC	Control
59	0.101449	0.864407	0.619364	PC	Control
60	0.101449	0.881356	0.523437	PC	Control
61	0.115942	0.881356	0.505626	PC	Control
62	0.130435	0.881356	0.455233	PC	Control
63	0.144928	0.881356	0.392719	PC	Control
64	0.15942	0.881356	0.367812	PC	Control
65	0.173913	0.881356	0.355379	PC	Control
66	0.173913	0.898305	0.284223	PC	Control
67	0.188406	0.898305	0.276503	PC	Control
68	0.188406	0.915254	0.247298	PC	Control
69	0.188406	0.932203	0.210608	PC	Control
70	0.188406	0.949153	0.204452	PC	Control
71	0.188406	0.966102	0.115291	PC	Control
72	0.202899	0.966102	0.107446	PC	Control
73	0.217391	0.966102	0.106665	PC	Control
74	0.231884	0.966102	0.102115	PC	Control
75	0.246377	0.966102	0.0908246	PC	Control
76	0.246377	0.983051	0.0586055	PC	Control
77	0.26087	0.983051	0.0545028	PC	Control
78	0.275362	0.983051	0.0543335	PC	Control
79	0.289855	0.983051	0.0508963	PC	Control
80	0.304348	0.983051	0.0498824	PC	Control
81	0.318841	0.983051	0.048103	PC	Control
82	0.333333	0.983051	0.0470429	PC	Control
83	0.347826	0.983051	0.0467446	PC	Control
84	0.362319	0.983051	0.0444222	PC	Control
85	0.376812	0.983051	0.0437167	PC	Control
86	0.391304	0.983051	0.0420889	PC	Control
87	0.405797	0.983051	0.0400581	PC	Control
88	0.42029	0.983051	0.0389968	PC	Control
89	0.434783	0.983051	0.0376975	PC	Control
90	0.449275	0.983051	0.037507	PC	Control
91	0.463768	0.983051	0.037078	PC	Control
92	0.478261	0.983051	0.0370756	PC	Control
93	0.492754	0.983051	0.0370244	PC	Control
94	0.507246	0.983051	0.0334288	PC	Control
95	0.521739	0.983051	0.0324879	PC	Control
96	0.536232	0.983051	0.03186	PC	Control
97	0.550725	0.983051	0.0305482	PC	Control
98	0.565217	0.983051	0.0304582	PC	Control
99	0.57971	0.983051	0.0300321	PC	Control
100	0.594203	0.983051	0.0298583	PC	Control
101	0.608696	0.983051	0.0283519	PC	Control
102	0.623188	0.983051	0.027456	PC	Control
103	0.637681	0.983051	0.0263096	PC	Control
104	0.652174	0.983051	0.0258981	PC	Control
105	0.666667	0.983051	0.024867	PC	Control
106	0.681159	0.983051	0.024681	PC	Control
107	0.695652	0.983051	0.0246655	PC	Control
108	0.710145	0.983051	0.0235061	PC	Control
109	0.724638	0.983051	0.0232618	PC	Control
110	0.73913	0.983051	0.022049	PC	Control
111	0.753623	0.983051	0.0211547	PC	Control
112	0.768116	0.983051	0.0208178	PC	Control
113	0.782609	0.983051	0.0204962	PC	Control
114	0.797101	0.983051	0.0194421	PC	Control
115	0.811594	0.983051	0.0191392	PC	Control
116	0.826087	0.983051	0.0180811	PC	Control
117	0.84058	0.983051	0.0173403	PC	Control
118	0.855072	0.983051	0.0154798	PC	Control
119	0.869565	0.983051	0.0153222	PC	Control
120	0.884058	0.983051	0.0149018	PC	Control
121	0.898551	0.983051	0.0144532	PC	Control
122	0.913043	0.983051	0.0130116	PC	Control
123	0.927536	0.983051	0.0128952	PC	Control
124	0.942029	0.983051	0.0124109	PC	Control
125	0.942029	1	0.0119764	PC	Control
126	0.956522	1	0.0108016	PC	Control
127	0.971014	1	0.00887635	PC	Control
128	0.985507	1	0.00722767	PC	Control
129	1	1	0.00722767	PC	Control

## Sheet: EDF 9b PR
	Recall	Precision	Probability Cutoff	Class 1	Class 2
1	1	0.460938	0.00722767	PC	Control
2	1	0.460938	0.00722767	PC	Control
3	1	0.464567	0.00887635	PC	Control
4	1	0.468254	0.0108016	PC	Control
5	1	0.472	0.0119764	PC	Control
6	1	0.475806	0.0124109	PC	Control
7	0.983051	0.471545	0.0128952	PC	Control
8	0.983051	0.47541	0.0130116	PC	Control
9	0.983051	0.479339	0.0144532	PC	Control
10	0.983051	0.483333	0.0149018	PC	Control
11	0.983051	0.487395	0.0153222	PC	Control
12	0.983051	0.491525	0.0154798	PC	Control
13	0.983051	0.495726	0.0173403	PC	Control
14	0.983051	0.5	0.0180811	PC	Control
15	0.983051	0.504348	0.0191392	PC	Control
16	0.983051	0.508772	0.0194421	PC	Control
17	0.983051	0.513274	0.0204962	PC	Control
18	0.983051	0.517857	0.0208178	PC	Control
19	0.983051	0.522523	0.0211547	PC	Control
20	0.983051	0.527273	0.022049	PC	Control
21	0.983051	0.53211	0.0232618	PC	Control
22	0.983051	0.537037	0.0235061	PC	Control
23	0.983051	0.542056	0.0246655	PC	Control
24	0.983051	0.54717	0.024681	PC	Control
25	0.983051	0.552381	0.024867	PC	Control
26	0.983051	0.557692	0.0258981	PC	Control
27	0.983051	0.563107	0.0263096	PC	Control
28	0.983051	0.568627	0.027456	PC	Control
29	0.983051	0.574257	0.0283519	PC	Control
30	0.983051	0.58	0.0298583	PC	Control
31	0.983051	0.585859	0.0300321	PC	Control
32	0.983051	0.591837	0.0304582	PC	Control
33	0.983051	0.597938	0.0305482	PC	Control
34	0.983051	0.604167	0.03186	PC	Control
35	0.983051	0.610526	0.0324879	PC	Control
36	0.983051	0.617021	0.0334288	PC	Control
37	0.983051	0.623656	0.0370244	PC	Control
38	0.983051	0.630435	0.0370756	PC	Control
39	0.983051	0.637363	0.037078	PC	Control
40	0.983051	0.644444	0.037507	PC	Control
41	0.983051	0.651685	0.0376975	PC	Control
42	0.983051	0.659091	0.0389968	PC	Control
43	0.983051	0.666667	0.0400581	PC	Control
44	0.983051	0.674419	0.0420889	PC	Control
45	0.983051	0.682353	0.0437167	PC	Control
46	0.983051	0.690476	0.0444222	PC	Control
47	0.983051	0.698795	0.0467446	PC	Control
48	0.983051	0.707317	0.0470429	PC	Control
49	0.983051	0.716049	0.048103	PC	Control
50	0.983051	0.725	0.0498824	PC	Control
51	0.983051	0.734177	0.0508963	PC	Control
52	0.983051	0.74359	0.0543335	PC	Control
53	0.983051	0.753247	0.0545028	PC	Control
54	0.983051	0.763158	0.0586055	PC	Control
55	0.983051	0.773333	0.0908246	PC	Control
56	0.966102	0.77027	0.102115	PC	Control
57	0.966102	0.780822	0.106665	PC	Control
58	0.966102	0.791667	0.107446	PC	Control
59	0.966102	0.802817	0.115291	PC	Control
60	0.966102	0.814286	0.204452	PC	Control
61	0.949153	0.811594	0.210608	PC	Control
62	0.932203	0.808824	0.247298	PC	Control
63	0.915254	0.80597	0.276503	PC	Control
64	0.898305	0.80303	0.284223	PC	Control
65	0.898305	0.815385	0.355379	PC	Control
66	0.881356	0.8125	0.367812	PC	Control
67	0.881356	0.825397	0.392719	PC	Control
68	0.881356	0.83871	0.455233	PC	Control
69	0.881356	0.852459	0.505626	PC	Control
70	0.881356	0.866667	0.523437	PC	Control
71	0.881356	0.881356	0.619364	PC	Control
72	0.864407	0.87931	0.625929	PC	Control
73	0.847458	0.877193	0.629902	PC	Control
74	0.830508	0.875	0.651971	PC	Control
75	0.830508	0.890909	0.660602	PC	Control
76	0.830508	0.907407	0.683458	PC	Control
77	0.813559	0.90566	0.695339	PC	Control
78	0.79661	0.903846	0.726984	PC	Control
79	0.79661	0.921569	0.749977	PC	Control
80	0.79661	0.94	0.769903	PC	Control
81	0.779661	0.938776	0.796375	PC	Control
82	0.762712	0.9375	0.828379	PC	Control
83	0.745763	0.93617	0.844071	PC	Control
84	0.728814	0.934783	0.848727	PC	Control
85	0.711864	0.933333	0.859275	PC	Control
86	0.694915	0.931818	0.860481	PC	Control
87	0.677966	0.930233	0.876771	PC	Control
88	0.661017	0.928571	0.886119	PC	Control
89	0.644068	0.926829	0.887055	PC	Control
90	0.627119	0.925	0.897958	PC	Control
91	0.610169	0.923077	0.900325	PC	Control
92	0.59322	0.921053	0.901924	PC	Control
93	0.576271	0.918919	0.909002	PC	Control
94	0.576271	0.944444	0.911248	PC	Control
95	0.559322	0.942857	0.912443	PC	Control
96	0.542373	0.941176	0.915702	PC	Control
97	0.525424	0.939394	0.926892	PC	Control
98	0.525424	0.96875	0.931382	PC	Control
99	0.508475	0.967742	0.942314	PC	Control
100	0.508475	1	0.943576	PC	Control
101	0.491525	1	0.948623	PC	Control
102	0.474576	1	0.952783	PC	Control
103	0.457627	1	0.955418	PC	Control
104	0.440678	1	0.955568	PC	Control
105	0.423729	1	0.955744	PC	Control
106	0.40678	1	0.958648	PC	Control
107	0.389831	1	0.95905	PC	Control
108	0.372881	1	0.959632	PC	Control
109	0.355932	1	0.960411	PC	Control
110	0.338983	1	0.960887	PC	Control
111	0.322034	1	0.964561	PC	Control
112	0.305085	1	0.965306	PC	Control
113	0.288136	1	0.968573	PC	Control
114	0.271186	1	0.970821	PC	Control
115	0.254237	1	0.971242	PC	Control
116	0.237288	1	0.972043	PC	Control
117	0.220339	1	0.974275	PC	Control
118	0.20339	1	0.975396	PC	Control
119	0.186441	1	0.975509	PC	Control
120	0.169492	1	0.976959	PC	Control
121	0.152542	1	0.978063	PC	Control
122	0.135593	1	0.97922	PC	Control
123	0.118644	1	0.979609	PC	Control
124	0.101695	1	0.981104	PC	Control
125	0.0847458	1	0.981145	PC	Control
126	0.0677966	1	0.982308	PC	Control
127	0.0508475	1	0.983276	PC	Control
128	0.0338983	1	0.984353	PC	Control
129	0.0169492	1	0.987338	PC	Control
130	0	1	0.987338	PC	Control

## Sheet: EDF 9c ROC
	FPR	Sensitivity	Probability Cutoff	Class 1	Class 2
1	0	0	0.996659	LC	Control
2	0	0.04	0.99488	LC	Control
3	0	0.08	0.992925	LC	Control
4	0	0.12	0.991799	LC	Control
5	0	0.16	0.990609	LC	Control
6	0	0.2	0.985512	LC	Control
7	0	0.24	0.983755	LC	Control
8	0	0.28	0.983252	LC	Control
9	0	0.32	0.97855	LC	Control
10	0	0.36	0.975685	LC	Control
11	0	0.4	0.974179	LC	Control
12	0	0.44	0.972006	LC	Control
13	0	0.48	0.962523	LC	Control
14	0	0.52	0.960995	LC	Control
15	0	0.56	0.955785	LC	Control
16	0	0.6	0.94613	LC	Control
17	0.0144928	0.6	0.943643	LC	Control
18	0.0144928	0.64	0.922552	LC	Control
19	0.0144928	0.68	0.916608	LC	Control
20	0.0289855	0.68	0.909237	LC	Control
21	0.0289855	0.72	0.896735	LC	Control
22	0.0289855	0.76	0.843031	LC	Control
23	0.0434783	0.76	0.842587	LC	Control
24	0.0434783	0.8	0.55794	LC	Control
25	0.057971	0.8	0.497132	LC	Control
26	0.057971	0.84	0.386266	LC	Control
27	0.0724638	0.84	0.384889	LC	Control
28	0.0869565	0.84	0.380022	LC	Control
29	0.0869565	0.88	0.374493	LC	Control
30	0.101449	0.88	0.319033	LC	Control
31	0.101449	0.92	0.271625	LC	Control
32	0.115942	0.92	0.242944	LC	Control
33	0.130435	0.92	0.129209	LC	Control
34	0.144928	0.92	0.124541	LC	Control
35	0.15942	0.92	0.116985	LC	Control
36	0.173913	0.92	0.0788071	LC	Control
37	0.173913	0.96	0.0715732	LC	Control
38	0.188406	0.96	0.0678195	LC	Control
39	0.202899	0.96	0.0663296	LC	Control
40	0.217391	0.96	0.057376	LC	Control
41	0.231884	0.96	0.0565503	LC	Control
42	0.246377	0.96	0.0532692	LC	Control
43	0.26087	0.96	0.0530293	LC	Control
44	0.275362	0.96	0.0495874	LC	Control
45	0.289855	0.96	0.0492923	LC	Control
46	0.304348	0.96	0.0463377	LC	Control
47	0.318841	0.96	0.0430502	LC	Control
48	0.333333	0.96	0.0415155	LC	Control
49	0.347826	0.96	0.0413476	LC	Control
50	0.362319	0.96	0.0408115	LC	Control
51	0.376812	0.96	0.0396313	LC	Control
52	0.376812	1	0.0392005	LC	Control
53	0.391304	1	0.0354268	LC	Control
54	0.405797	1	0.0346396	LC	Control
55	0.42029	1	0.0289449	LC	Control
56	0.449275	1	0.0261155	LC	Control
57	0.463768	1	0.025816	LC	Control
58	0.478261	1	0.0244836	LC	Control
59	0.492754	1	0.0232537	LC	Control
60	0.507246	1	0.0226654	LC	Control
61	0.521739	1	0.0222664	LC	Control
62	0.536232	1	0.0219536	LC	Control
63	0.550725	1	0.0218921	LC	Control
64	0.565217	1	0.0218778	LC	Control
65	0.57971	1	0.0213619	LC	Control
66	0.594203	1	0.02042	LC	Control
67	0.608696	1	0.0193451	LC	Control
68	0.623188	1	0.0186745	LC	Control
69	0.637681	1	0.0182027	LC	Control
70	0.652174	1	0.0159443	LC	Control
71	0.666667	1	0.0159417	LC	Control
72	0.681159	1	0.0143681	LC	Control
73	0.695652	1	0.0140635	LC	Control
74	0.710145	1	0.0138838	LC	Control
75	0.724638	1	0.0133977	LC	Control
76	0.73913	1	0.0121556	LC	Control
77	0.753623	1	0.0107514	LC	Control
78	0.768116	1	0.0106189	LC	Control
79	0.782609	1	0.00950921	LC	Control
80	0.797101	1	0.00896659	LC	Control
81	0.811594	1	0.00825791	LC	Control
82	0.826087	1	0.00807529	LC	Control
83	0.84058	1	0.00792679	LC	Control
84	0.855072	1	0.00763552	LC	Control
85	0.869565	1	0.00733828	LC	Control
86	0.884058	1	0.00722696	LC	Control
87	0.898551	1	0.00674641	LC	Control
88	0.913043	1	0.00600037	LC	Control
89	0.927536	1	0.00577543	LC	Control
90	0.942029	1	0.00576667	LC	Control
91	0.956522	1	0.00487568	LC	Control
92	0.971014	1	0.00452834	LC	Control
93	0.985507	1	0.000641673	LC	Control
94	1	1	0.000641673	LC	Control

## Sheet: EDF 9c PR
	Recall	Precision	Probability Cutoff	Class 1	Class 2
1	1	0.265957	0.000641673	LC	Control
2	1	0.265957	0.000641673	LC	Control
3	1	0.268817	0.00452834	LC	Control
4	1	0.271739	0.00487568	LC	Control
5	1	0.274725	0.00576667	LC	Control
6	1	0.277778	0.00577543	LC	Control
7	1	0.280899	0.00600037	LC	Control
8	1	0.284091	0.00674641	LC	Control
9	1	0.287356	0.00722696	LC	Control
10	1	0.290698	0.00733828	LC	Control
11	1	0.294118	0.00763552	LC	Control
12	1	0.297619	0.00792679	LC	Control
13	1	0.301205	0.00807529	LC	Control
14	1	0.304878	0.00825791	LC	Control
15	1	0.308642	0.00896659	LC	Control
16	1	0.3125	0.00950921	LC	Control
17	1	0.316456	0.0106189	LC	Control
18	1	0.320513	0.0107514	LC	Control
19	1	0.324675	0.0121556	LC	Control
20	1	0.328947	0.0133977	LC	Control
21	1	0.333333	0.0138838	LC	Control
22	1	0.337838	0.0140635	LC	Control
23	1	0.342466	0.0143681	LC	Control
24	1	0.347222	0.0159417	LC	Control
25	1	0.352113	0.0159443	LC	Control
26	1	0.357143	0.0182027	LC	Control
27	1	0.362319	0.0186745	LC	Control
28	1	0.367647	0.0193451	LC	Control
29	1	0.373134	0.02042	LC	Control
30	1	0.378788	0.0213619	LC	Control
31	1	0.384615	0.0218778	LC	Control
32	1	0.390625	0.0218921	LC	Control
33	1	0.396825	0.0219536	LC	Control
34	1	0.403226	0.0222664	LC	Control
35	1	0.409836	0.0226654	LC	Control
36	1	0.416667	0.0232537	LC	Control
37	1	0.423729	0.0244836	LC	Control
38	1	0.431034	0.025816	LC	Control
39	1	0.438596	0.0261155	LC	Control
40	1	0.446429	0.0289449	LC	Control
41	1	0.462963	0.0346396	LC	Control
42	1	0.471698	0.0354268	LC	Control
43	1	0.480769	0.0392005	LC	Control
44	1	0.490196	0.0396313	LC	Control
45	0.96	0.48	0.0408115	LC	Control
46	0.96	0.489796	0.0413476	LC	Control
47	0.96	0.5	0.0415155	LC	Control
48	0.96	0.510638	0.0430502	LC	Control
49	0.96	0.521739	0.0463377	LC	Control
50	0.96	0.533333	0.0492923	LC	Control
51	0.96	0.545455	0.0495874	LC	Control
52	0.96	0.55814	0.0530293	LC	Control
53	0.96	0.571429	0.0532692	LC	Control
54	0.96	0.585366	0.0565503	LC	Control
55	0.96	0.6	0.057376	LC	Control
56	0.96	0.615385	0.0663296	LC	Control
57	0.96	0.631579	0.0678195	LC	Control
58	0.96	0.648649	0.0715732	LC	Control
59	0.96	0.666667	0.0788071	LC	Control
60	0.92	0.657143	0.116985	LC	Control
61	0.92	0.676471	0.124541	LC	Control
62	0.92	0.69697	0.129209	LC	Control
63	0.92	0.71875	0.242944	LC	Control
64	0.92	0.741935	0.271625	LC	Control
65	0.92	0.766667	0.319033	LC	Control
66	0.88	0.758621	0.374493	LC	Control
67	0.88	0.785714	0.380022	LC	Control
68	0.84	0.777778	0.384889	LC	Control
69	0.84	0.807692	0.386266	LC	Control
70	0.84	0.84	0.497132	LC	Control
71	0.8	0.833333	0.55794	LC	Control
72	0.8	0.869565	0.842587	LC	Control
73	0.76	0.863636	0.843031	LC	Control
74	0.76	0.904762	0.896735	LC	Control
75	0.72	0.9	0.909237	LC	Control
76	0.68	0.894737	0.916608	LC	Control
77	0.68	0.944444	0.922552	LC	Control
78	0.64	0.941176	0.943643	LC	Control
79	0.6	0.9375	0.94613	LC	Control
80	0.6	1	0.955785	LC	Control
81	0.56	1	0.960995	LC	Control
82	0.52	1	0.962523	LC	Control
83	0.48	1	0.972006	LC	Control
84	0.44	1	0.974179	LC	Control
85	0.4	1	0.975685	LC	Control
86	0.36	1	0.97855	LC	Control
87	0.32	1	0.983252	LC	Control
88	0.28	1	0.983755	LC	Control
89	0.24	1	0.985512	LC	Control
90	0.2	1	0.990609	LC	Control
91	0.16	1	0.991799	LC	Control
92	0.12	1	0.992925	LC	Control
93	0.08	1	0.99488	LC	Control
94	0.04	1	0.996659	LC	Control
95	0	1	0.996659	LC	Control

## Sheet: EDF 9d ROC
	FPR	Sensitivity	Probability Cutoff	Class 1	Class 2
1	0	0	0.766014	SKCM	Control
2	0.0144928	0	0.750906	SKCM	Control
3	0.0144928	0.0625	0.731608	SKCM	Control
4	0.0289855	0.0625	0.713106	SKCM	Control
5	0.0434783	0.0625	0.69981	SKCM	Control
6	0.0434783	0.125	0.687101	SKCM	Control
7	0.0434783	0.1875	0.649603	SKCM	Control
8	0.0434783	0.25	0.64855	SKCM	Control
9	0.0434783	0.3125	0.648188	SKCM	Control
10	0.0434783	0.375	0.606665	SKCM	Control
11	0.057971	0.375	0.57299	SKCM	Control
12	0.0724638	0.375	0.572701	SKCM	Control
13	0.0724638	0.4375	0.504282	SKCM	Control
14	0.0869565	0.4375	0.484915	SKCM	Control
15	0.0869565	0.5	0.483997	SKCM	Control
16	0.101449	0.5	0.466061	SKCM	Control
17	0.115942	0.5	0.454787	SKCM	Control
18	0.115942	0.5625	0.453753	SKCM	Control
19	0.115942	0.625	0.440139	SKCM	Control
20	0.115942	0.6875	0.400474	SKCM	Control
21	0.130435	0.6875	0.372027	SKCM	Control
22	0.130435	0.75	0.349071	SKCM	Control
23	0.144928	0.75	0.33442	SKCM	Control
24	0.15942	0.75	0.317905	SKCM	Control
25	0.173913	0.75	0.307588	SKCM	Control
26	0.188406	0.75	0.288511	SKCM	Control
27	0.202899	0.75	0.259256	SKCM	Control
28	0.217391	0.75	0.238057	SKCM	Control
29	0.231884	0.75	0.227222	SKCM	Control
30	0.246377	0.75	0.22712	SKCM	Control
31	0.26087	0.75	0.214598	SKCM	Control
32	0.275362	0.75	0.187674	SKCM	Control
33	0.289855	0.75	0.179848	SKCM	Control
34	0.304348	0.75	0.175454	SKCM	Control
35	0.318841	0.75	0.175002	SKCM	Control
36	0.333333	0.75	0.172527	SKCM	Control
37	0.347826	0.75	0.170374	SKCM	Control
38	0.362319	0.75	0.164742	SKCM	Control
39	0.376812	0.75	0.149297	SKCM	Control
40	0.391304	0.75	0.140618	SKCM	Control
41	0.405797	0.75	0.138069	SKCM	Control
42	0.42029	0.75	0.122371	SKCM	Control
43	0.434783	0.75	0.120881	SKCM	Control
44	0.449275	0.75	0.117948	SKCM	Control
45	0.463768	0.75	0.114801	SKCM	Control
46	0.478261	0.75	0.113775	SKCM	Control
47	0.478261	0.8125	0.109406	SKCM	Control
48	0.492754	0.8125	0.103184	SKCM	Control
49	0.507246	0.8125	0.100105	SKCM	Control
50	0.521739	0.8125	0.09385	SKCM	Control
51	0.536232	0.8125	0.0872001	SKCM	Control
52	0.550725	0.8125	0.0861804	SKCM	Control
53	0.565217	0.8125	0.0851753	SKCM	Control
54	0.57971	0.8125	0.0829345	SKCM	Control
55	0.594203	0.8125	0.0784085	SKCM	Control
56	0.608696	0.8125	0.0777399	SKCM	Control
57	0.623188	0.8125	0.0763681	SKCM	Control
58	0.637681	0.8125	0.0750193	SKCM	Control
59	0.652174	0.8125	0.0748379	SKCM	Control
60	0.666667	0.8125	0.0716723	SKCM	Control
61	0.681159	0.8125	0.0683819	SKCM	Control
62	0.695652	0.8125	0.0626255	SKCM	Control
63	0.710145	0.8125	0.0620497	SKCM	Control
64	0.724638	0.8125	0.0607944	SKCM	Control
65	0.73913	0.8125	0.0473419	SKCM	Control
66	0.753623	0.8125	0.046886	SKCM	Control
67	0.768116	0.8125	0.0434212	SKCM	Control
68	0.782609	0.8125	0.0424227	SKCM	Control
69	0.782609	0.875	0.0404285	SKCM	Control
70	0.782609	0.9375	0.0401661	SKCM	Control
71	0.797101	0.9375	0.0398609	SKCM	Control
72	0.811594	0.9375	0.0392557	SKCM	Control
73	0.826087	0.9375	0.036723	SKCM	Control
74	0.84058	0.9375	0.036063	SKCM	Control
75	0.855072	0.9375	0.0338476	SKCM	Control
76	0.869565	0.9375	0.0331696	SKCM	Control
77	0.884058	0.9375	0.0290519	SKCM	Control
78	0.898551	0.9375	0.0276203	SKCM	Control
79	0.913043	0.9375	0.0265425	SKCM	Control
80	0.927536	0.9375	0.0253345	SKCM	Control
81	0.942029	0.9375	0.0195668	SKCM	Control
82	0.956522	0.9375	0.0182433	SKCM	Control
83	0.971014	0.9375	0.0167996	SKCM	Control
84	0.985507	0.9375	0.0151345	SKCM	Control
85	1	0.9375	0.0130346	SKCM	Control
86	1	1	0.0130346	SKCM	Control

## Sheet: EDF 9d PR
	Recall	Precision	Probability Cutoff	Class 1	Class 2
1	1	0.188235	0.0130346	SKCM	Control
2	1	0.188235	0.0130346	SKCM	Control
3	0.9375	0.178571	0.0151345	SKCM	Control
4	0.9375	0.180723	0.0167996	SKCM	Control
5	0.9375	0.182927	0.0182433	SKCM	Control
6	0.9375	0.185185	0.0195668	SKCM	Control
7	0.9375	0.1875	0.0253345	SKCM	Control
8	0.9375	0.189873	0.0265425	SKCM	Control
9	0.9375	0.192308	0.0276203	SKCM	Control
10	0.9375	0.194805	0.0290519	SKCM	Control
11	0.9375	0.197368	0.0331696	SKCM	Control
12	0.9375	0.2	0.0338476	SKCM	Control
13	0.9375	0.202703	0.036063	SKCM	Control
14	0.9375	0.205479	0.036723	SKCM	Control
15	0.9375	0.208333	0.0392557	SKCM	Control
16	0.9375	0.211268	0.0398609	SKCM	Control
17	0.9375	0.214286	0.0401661	SKCM	Control
18	0.9375	0.217391	0.0404285	SKCM	Control
19	0.875	0.205882	0.0424227	SKCM	Control
20	0.8125	0.19403	0.0434212	SKCM	Control
21	0.8125	0.19697	0.046886	SKCM	Control
22	0.8125	0.2	0.0473419	SKCM	Control
23	0.8125	0.203125	0.0607944	SKCM	Control
24	0.8125	0.206349	0.0620497	SKCM	Control
25	0.8125	0.209677	0.0626255	SKCM	Control
26	0.8125	0.213115	0.0683819	SKCM	Control
27	0.8125	0.216667	0.0716723	SKCM	Control
28	0.8125	0.220339	0.0748379	SKCM	Control
29	0.8125	0.224138	0.0750193	SKCM	Control
30	0.8125	0.22807	0.0763681	SKCM	Control
31	0.8125	0.232143	0.0777399	SKCM	Control
32	0.8125	0.236364	0.0784085	SKCM	Control
33	0.8125	0.240741	0.0829345	SKCM	Control
34	0.8125	0.245283	0.0851753	SKCM	Control
35	0.8125	0.25	0.0861804	SKCM	Control
36	0.8125	0.254902	0.0872001	SKCM	Control
37	0.8125	0.26	0.09385	SKCM	Control
38	0.8125	0.265306	0.100105	SKCM	Control
39	0.8125	0.270833	0.103184	SKCM	Control
40	0.8125	0.276596	0.109406	SKCM	Control
41	0.8125	0.282609	0.113775	SKCM	Control
42	0.75	0.266667	0.114801	SKCM	Control
43	0.75	0.272727	0.117948	SKCM	Control
44	0.75	0.27907	0.120881	SKCM	Control
45	0.75	0.285714	0.122371	SKCM	Control
46	0.75	0.292683	0.138069	SKCM	Control
47	0.75	0.3	0.140618	SKCM	Control
48	0.75	0.307692	0.149297	SKCM	Control
49	0.75	0.315789	0.164742	SKCM	Control
50	0.75	0.324324	0.170374	SKCM	Control
51	0.75	0.333333	0.172527	SKCM	Control
52	0.75	0.342857	0.175002	SKCM	Control
53	0.75	0.352941	0.175454	SKCM	Control
54	0.75	0.363636	0.179848	SKCM	Control
55	0.75	0.375	0.187674	SKCM	Control
56	0.75	0.387097	0.214598	SKCM	Control
57	0.75	0.4	0.22712	SKCM	Control
58	0.75	0.413793	0.227222	SKCM	Control
59	0.75	0.428571	0.238057	SKCM	Control
60	0.75	0.444444	0.259256	SKCM	Control
61	0.75	0.461538	0.288511	SKCM	Control
62	0.75	0.48	0.307588	SKCM	Control
63	0.75	0.5	0.317905	SKCM	Control
64	0.75	0.521739	0.33442	SKCM	Control
65	0.75	0.545455	0.349071	SKCM	Control
66	0.75	0.571429	0.372027	SKCM	Control
67	0.6875	0.55	0.400474	SKCM	Control
68	0.6875	0.578947	0.440139	SKCM	Control
69	0.625	0.555556	0.453753	SKCM	Control
70	0.5625	0.529412	0.454787	SKCM	Control
71	0.5	0.5	0.466061	SKCM	Control
72	0.5	0.533333	0.483997	SKCM	Control
73	0.5	0.571429	0.484915	SKCM	Control
74	0.4375	0.538462	0.504282	SKCM	Control
75	0.4375	0.583333	0.572701	SKCM	Control
76	0.375	0.545455	0.57299	SKCM	Control
77	0.375	0.6	0.606665	SKCM	Control
78	0.375	0.666667	0.648188	SKCM	Control
79	0.3125	0.625	0.64855	SKCM	Control
80	0.25	0.571429	0.649603	SKCM	Control
81	0.1875	0.5	0.687101	SKCM	Control
82	0.125	0.4	0.69981	SKCM	Control
83	0.0625	0.25	0.713106	SKCM	Control
84	0.0625	0.333333	0.731608	SKCM	Control
85	0.0625	0.5	0.750906	SKCM	Control
86	0	0	0.766014	SKCM	Control
87	0	0	0.766014	SKCM	Control

## Sheet: EDF 9e ROC
	FPR	Sensitivity	Probability Cutoff	Class 1	Class 2
1	0	0	0.980513	PC	LC
2	0	0.0169492	0.978701	PC	LC
3	0	0.0338983	0.975957	PC	LC
4	0	0.0508475	0.973322	PC	LC
5	0	0.0677966	0.973209	PC	LC
6	0	0.0847458	0.973106	PC	LC
7	0.04	0.0847458	0.971464	PC	LC
8	0.08	0.0847458	0.970397	PC	LC
9	0.08	0.101695	0.968535	PC	LC
10	0.08	0.118644	0.967655	PC	LC
11	0.08	0.135593	0.967448	PC	LC
12	0.08	0.152542	0.966772	PC	LC
13	0.08	0.169492	0.965229	PC	LC
14	0.08	0.186441	0.963419	PC	LC
15	0.08	0.20339	0.963096	PC	LC
16	0.08	0.220339	0.963029	PC	LC
17	0.08	0.237288	0.962867	PC	LC
18	0.08	0.254237	0.962854	PC	LC
19	0.08	0.271186	0.960167	PC	LC
20	0.08	0.288136	0.959795	PC	LC
21	0.08	0.305085	0.956301	PC	LC
22	0.08	0.322034	0.95599	PC	LC
23	0.08	0.338983	0.955615	PC	LC
24	0.08	0.355932	0.953333	PC	LC
25	0.08	0.372881	0.950733	PC	LC
26	0.08	0.389831	0.947443	PC	LC
27	0.08	0.40678	0.944811	PC	LC
28	0.08	0.423729	0.943428	PC	LC
29	0.08	0.440678	0.938699	PC	LC
30	0.08	0.457627	0.938045	PC	LC
31	0.08	0.474576	0.936531	PC	LC
32	0.08	0.491525	0.93313	PC	LC
33	0.08	0.508475	0.925846	PC	LC
34	0.08	0.525424	0.924715	PC	LC
35	0.08	0.542373	0.918009	PC	LC
36	0.08	0.559322	0.917786	PC	LC
37	0.08	0.576271	0.917381	PC	LC
38	0.08	0.59322	0.917069	PC	LC
39	0.08	0.610169	0.916586	PC	LC
40	0.08	0.627119	0.913694	PC	LC
41	0.08	0.644068	0.912763	PC	LC
42	0.08	0.661017	0.911522	PC	LC
43	0.08	0.677966	0.909247	PC	LC
44	0.08	0.694915	0.907467	PC	LC
45	0.12	0.694915	0.905703	PC	LC
46	0.12	0.711864	0.905003	PC	LC
47	0.12	0.728814	0.902832	PC	LC
48	0.12	0.745763	0.886751	PC	LC
49	0.12	0.762712	0.885783	PC	LC
50	0.12	0.779661	0.882967	PC	LC
51	0.12	0.79661	0.882186	PC	LC
52	0.12	0.813559	0.873122	PC	LC
53	0.12	0.830508	0.867675	PC	LC
54	0.12	0.847458	0.852992	PC	LC
55	0.12	0.864407	0.831787	PC	LC
56	0.12	0.881356	0.811106	PC	LC
57	0.16	0.881356	0.801114	PC	LC
58	0.2	0.881356	0.79365	PC	LC
59	0.2	0.898305	0.77489	PC	LC
60	0.2	0.915254	0.77136	PC	LC
61	0.24	0.915254	0.770009	PC	LC
62	0.24	0.932203	0.691948	PC	LC
63	0.28	0.932203	0.58589	PC	LC
64	0.32	0.932203	0.584013	PC	LC
65	0.32	0.949153	0.337552	PC	LC
66	0.32	0.966102	0.299776	PC	LC
67	0.32	0.983051	0.266096	PC	LC
68	0.32	1	0.0995421	PC	LC
69	0.36	1	0.0673955	PC	LC
70	0.4	1	0.0440083	PC	LC
71	0.44	1	0.043286	PC	LC
72	0.48	1	0.0405124	PC	LC
73	0.52	1	0.0359388	PC	LC
74	0.56	1	0.0318176	PC	LC
75	0.6	1	0.0306998	PC	LC
76	0.64	1	0.0281114	PC	LC
77	0.68	1	0.0261996	PC	LC
78	0.72	1	0.0237629	PC	LC
79	0.76	1	0.0235679	PC	LC
80	0.8	1	0.0220002	PC	LC
81	0.84	1	0.0216109	PC	LC
82	0.88	1	0.0210277	PC	LC
83	0.92	1	0.0188058	PC	LC
84	0.96	1	0.0183128	PC	LC
85	1	1	0.0183128	PC	LC

## Sheet: EDF 9e PR
	Recall	Precision	Probability Cutoff	Class 1	Class 2
1	1	0.702381	0.0183128	PC	LC
2	1	0.702381	0.0183128	PC	LC
3	1	0.710843	0.0188058	PC	LC
4	1	0.719512	0.0210277	PC	LC
5	1	0.728395	0.0216109	PC	LC
6	1	0.7375	0.0220002	PC	LC
7	1	0.746835	0.0235679	PC	LC
8	1	0.75641	0.0237629	PC	LC
9	1	0.766234	0.0261996	PC	LC
10	1	0.776316	0.0281114	PC	LC
11	1	0.786667	0.0306998	PC	LC
12	1	0.797297	0.0318176	PC	LC
13	1	0.808219	0.0359388	PC	LC
14	1	0.819444	0.0405124	PC	LC
15	1	0.830986	0.043286	PC	LC
16	1	0.842857	0.0440083	PC	LC
17	1	0.855072	0.0673955	PC	LC
18	1	0.867647	0.0995421	PC	LC
19	1	0.880597	0.266096	PC	LC
20	0.983051	0.878788	0.299776	PC	LC
21	0.966102	0.876923	0.337552	PC	LC
22	0.949153	0.875	0.584013	PC	LC
23	0.932203	0.873016	0.58589	PC	LC
24	0.932203	0.887097	0.691948	PC	LC
25	0.932203	0.901639	0.770009	PC	LC
26	0.915254	0.9	0.77136	PC	LC
27	0.915254	0.915254	0.77489	PC	LC
28	0.898305	0.913793	0.79365	PC	LC
29	0.881356	0.912281	0.801114	PC	LC
30	0.881356	0.928571	0.811106	PC	LC
31	0.881356	0.945455	0.831787	PC	LC
32	0.864407	0.944444	0.852992	PC	LC
33	0.847458	0.943396	0.867675	PC	LC
34	0.830508	0.942308	0.873122	PC	LC
35	0.813559	0.941176	0.882186	PC	LC
36	0.79661	0.94	0.882967	PC	LC
37	0.779661	0.938776	0.885783	PC	LC
38	0.762712	0.9375	0.886751	PC	LC
39	0.745763	0.93617	0.902832	PC	LC
40	0.728814	0.934783	0.905003	PC	LC
41	0.711864	0.933333	0.905703	PC	LC
42	0.694915	0.931818	0.907467	PC	LC
43	0.694915	0.953488	0.909247	PC	LC
44	0.677966	0.952381	0.911522	PC	LC
45	0.661017	0.95122	0.912763	PC	LC
46	0.644068	0.95	0.913694	PC	LC
47	0.627119	0.948718	0.916586	PC	LC
48	0.610169	0.947368	0.917069	PC	LC
49	0.59322	0.945946	0.917381	PC	LC
50	0.576271	0.944444	0.917786	PC	LC
51	0.559322	0.942857	0.918009	PC	LC
52	0.542373	0.941176	0.924715	PC	LC
53	0.525424	0.939394	0.925846	PC	LC
54	0.508475	0.9375	0.93313	PC	LC
55	0.491525	0.935484	0.936531	PC	LC
56	0.474576	0.933333	0.938045	PC	LC
57	0.457627	0.931034	0.938699	PC	LC
58	0.440678	0.928571	0.943428	PC	LC
59	0.423729	0.925926	0.944811	PC	LC
60	0.40678	0.923077	0.947443	PC	LC
61	0.389831	0.92	0.950733	PC	LC
62	0.372881	0.916667	0.953333	PC	LC
63	0.355932	0.913043	0.955615	PC	LC
64	0.338983	0.909091	0.95599	PC	LC
65	0.322034	0.904762	0.956301	PC	LC
66	0.305085	0.9	0.959795	PC	LC
67	0.288136	0.894737	0.960167	PC	LC
68	0.271186	0.888889	0.962854	PC	LC
69	0.254237	0.882353	0.962867	PC	LC
70	0.237288	0.875	0.963029	PC	LC
71	0.220339	0.866667	0.963096	PC	LC
72	0.20339	0.857143	0.963419	PC	LC
73	0.186441	0.846154	0.965229	PC	LC
74	0.169492	0.833333	0.966772	PC	LC
75	0.152542	0.818182	0.967448	PC	LC
76	0.135593	0.8	0.967655	PC	LC
77	0.118644	0.777778	0.968535	PC	LC
78	0.101695	0.75	0.970397	PC	LC
79	0.0847458	0.714286	0.971464	PC	LC
80	0.0847458	0.833333	0.973106	PC	LC
81	0.0847458	1	0.973209	PC	LC
82	0.0677966	1	0.973322	PC	LC
83	0.0508475	1	0.975957	PC	LC
84	0.0338983	1	0.978701	PC	LC
85	0.0169492	1	0.980513	PC	LC
86	0	1	0.980513	PC	LC

[truncated: 4 more sheets: EDF 9f ROC, EDF 9f PR, EDF 9g ROC, EDF 9g PR]
